# Supplementary material
Source: PubMed Central journal article supplement (PMC8251457)
Supplement: TBED-69-1131-s001.pdf [file TBED-69-1131-s001.pdf]

## Supplementary appendix for

**Supplement to:** Geodemography, environment and societal characteristics drive the global diversity of emerging, zoonotic and human pathogens

### Table of contents

| S. No. | Contents                                                                                                                                                                                                                                                                                                                                                                                                                                                                | Page   |
|--------|-------------------------------------------------------------------------------------------------------------------------------------------------------------------------------------------------------------------------------------------------------------------------------------------------------------------------------------------------------------------------------------------------------------------------------------------------------------------------|--------|
|        | <b>Methods</b>                                                                                                                                                                                                                                                                                                                                                                                                                                                          |        |
| 1      | Microbe-country dataset development                                                                                                                                                                                                                                                                                                                                                                                                                                     | 3      |
| 2      | Table S1. List of country-specific social, environmental and geodemographic variables used in the study.                                                                                                                                                                                                                                                                                                                                                                | 4–5    |
| 3      | Table S2. Country-specific parameters, and number of human, emerging, zoonotic, and total pathogens isolated from different countries                                                                                                                                                                                                                                                                                                                                   | 6–46   |
| 4      | List of variables that were log-transformed during analysis of this study                                                                                                                                                                                                                                                                                                                                                                                               | 47     |
| 5      | Table S3. List of variables that were retained after excluding correlated variables                                                                                                                                                                                                                                                                                                                                                                                     | 48–49  |
| 6      | Table S4. Country-specific predictor and response variables used for prediction                                                                                                                                                                                                                                                                                                                                                                                         | 50–71  |
|        | <b>Results</b>                                                                                                                                                                                                                                                                                                                                                                                                                                                          |        |
| 7      | Table S5. Summary statistics of country-specific predictor and response variables used in this study                                                                                                                                                                                                                                                                                                                                                                    | 72–75  |
| 8      | Table S6. Summary statistics of log-transformed variables used in the study.                                                                                                                                                                                                                                                                                                                                                                                            | 76–77  |
|        | <b>Zoonotic pathogen diversity</b>                                                                                                                                                                                                                                                                                                                                                                                                                                      |        |
| 9      | Table S7. Univariable analysis (outcome: logarithm of zoonotic pathogen count; original data)                                                                                                                                                                                                                                                                                                                                                                           | 78–79  |
| 10     | Table S8. Univariable analysis (outcome: logarithm of zoonotic pathogen count; winsorised data)                                                                                                                                                                                                                                                                                                                                                                         | 80–81  |
| 11     | Table S9. Generalized additive model of zoonotic pathogens reported from different countries (original data– uncontrolled research effort)                                                                                                                                                                                                                                                                                                                              | 82     |
| 12     | Table S10. Generalized additive model of zoonotic pathogens reported from different countries (winsorized data– uncontrolled research effort)                                                                                                                                                                                                                                                                                                                           | 83     |
| 13     | Fig. S1. Smoothed curves of the additive effect to the estimated logarithm of number of zoonotic pathogens (winsorized data–uncontrolled research effort) for the individual environmental and social parameters in the Generalized Additive Model. Shaded areas represent 95% confidence intervals. Plots showing the combined effect of the linear and nonparametric contributions as well as significant interactions among smoothed terms have also been presented. | 84     |
| 14     | Table S11. Generalized additive model of zoonotic pathogens reported from different countries (original data - after controlling for the research effort)                                                                                                                                                                                                                                                                                                               | 85     |
| 15     | Table S12. Generalized additive model of zoonotic pathogen diversity (winsorized data–controlled research effort)                                                                                                                                                                                                                                                                                                                                                       | 86     |
| 16     | Fig. S2. Smoothed curves of the additive effect to the estimated logarithm of number of zoonotic pathogens (winsorized data–controlled research effort) for the individual environmental and social parameters in the Generalized Additive Model. Shaded areas represent 95% confidence intervals. Plots showing the combined effect of the linear and nonparametric contributions as well as significant interactions among smoothed terms have also been presented.   | 87     |
|        | <b>Emerging pathogen diversity</b>                                                                                                                                                                                                                                                                                                                                                                                                                                      |        |
| 17     | Table S13. Univariable analysis (outcome: logarithm of emerging pathogen count; original data)                                                                                                                                                                                                                                                                                                                                                                          | 88–89  |
| 18     | Table S14. Univariable analysis (outcome: logarithm of emerging pathogen count; winsorised data)                                                                                                                                                                                                                                                                                                                                                                        | 90–91  |
| 19     | Table S15. Generalized additive model of emerging pathogens reported from different countries (original data– <u>uncontrolled research effort</u> )                                                                                                                                                                                                                                                                                                                     | 92     |
| 20     | Table S16. Generalized additive modelling of emerging pathogen diversity (winsorized data–uncontrolled research effort)                                                                                                                                                                                                                                                                                                                                                 | 93     |
| 21     | Fig. S3. Smoothed curves of the additive effect to the estimated logarithm of number of emerging pathogens (winsorized data–uncontrolled research effort) for the individual environmental and social parameters in the Generalized Additive Model. Shaded areas represent 95% confidence intervals. Plots showing the combined effect of the linear and                                                                                                                | 94–100 |

|    |                                                                                                                                                                                                                                                                                                                                                                                                                                                                       |         |
|----|-----------------------------------------------------------------------------------------------------------------------------------------------------------------------------------------------------------------------------------------------------------------------------------------------------------------------------------------------------------------------------------------------------------------------------------------------------------------------|---------|
|    | nonparametric contributions as well as significant interactions among smoothed terms have also been presented.                                                                                                                                                                                                                                                                                                                                                        |         |
| 22 | Table S17. Generalized additive model of emerging pathogens reported from different countries (original data – after controlling for the research effort)                                                                                                                                                                                                                                                                                                             | 101     |
| 23 | Table S18. Generalized additive model of emerging pathogens reported from different countries (winsorized data–controlled research effort)                                                                                                                                                                                                                                                                                                                            | 102     |
| 24 | Fig. S4. Smoothed curves of the additive effect to the estimated logarithm of number of emerging pathogens (winsorized data–controlled research effort) for the individual environmental and social parameters in the Generalized Additive Model. Shaded areas represent 95% confidence intervals. Plots showing the combined effect of the linear and nonparametric contributions as well as significant interactions among smoothed terms have also been presented. | 103–106 |
|    | <b><i>Human pathogen diversity</i></b>                                                                                                                                                                                                                                                                                                                                                                                                                                |         |
| 25 | Table S19. Univariable analysis (outcome: logarithm of human pathogen count; original data)                                                                                                                                                                                                                                                                                                                                                                           | 107–108 |
| 26 | Table S20. Univariable analysis (outcome: logarithm of human pathogen count; winsorised data)                                                                                                                                                                                                                                                                                                                                                                         | 109–110 |
| 27 | Table S21. Generalized additive model of human pathogens reported from different countries (original data– uncontrolled research effort)                                                                                                                                                                                                                                                                                                                              | 111     |
| 28 | Table S22. Generalized additive model of human pathogens reported from different countries (winsorised data–uncontrolled research effort)                                                                                                                                                                                                                                                                                                                             | 112     |
| 29 | Fig. S5. Smoothed curves of the additive effect to the estimated logarithm of number of human pathogens (winsorized data–uncontrolled research effort) for the individual environmental and social parameters in the Generalized Additive Model. Shaded areas represent 95% confidence intervals. Plots showing the combined effect of the linear and nonparametric contributions as well as significant interactions among smoothed terms have also been presented.  | 113–115 |
| 30 | Table S23. Generalized additive model of human pathogens reported from different countries (original data - after controlling for the research effort)                                                                                                                                                                                                                                                                                                                | 116     |
| 31 | Table S24. Generalized additive model of human pathogens reported from different countries (winsorised data - after controlling for the research effort)                                                                                                                                                                                                                                                                                                              | 117     |
| 32 | Fig. S6. Smoothed curves of the additive effect to the estimated logarithm of number of human pathogens (winsorized data–uncontrolled research effort) for the individual environmental and social parameters in the Generalized Additive Model. Shaded areas represent 95% confidence intervals. Plots showing the combined effect of the linear and nonparametric contributions as well as significant interactions among smoothed terms have also been presented.  | 118–121 |
|    | <b>Predictive ability</b>                                                                                                                                                                                                                                                                                                                                                                                                                                             |         |
| 33 | Table S25. Predictive values (in logarithm of pathogen counts) of zoonotic/human/emerging pathogen diversity estimated for different countries                                                                                                                                                                                                                                                                                                                        | 122–127 |
| 34 | <b>References</b>                                                                                                                                                                                                                                                                                                                                                                                                                                                     | 128–129 |
| 35 | List of pathogens along with the pathogen classifications (human, emerging and zoonotic) used in the current study                                                                                                                                                                                                                                                                                                                                                    | 130-408 |

---

## **Methods (in detail)**

### **Microbe-country dataset development**

We compiled a database of microbes reported from different countries. The procedure followed for the database development are outlined below.

#### **a) Microbe-location dataset**

A species-location interactions dataset developed by Wardeh and colleagues (Wardeh, Risley, McIntyre, Setzkorn, & Baylis, 2015) was used to determine viral, bacterial, parasitic, and fungal species reported from different countries. The published dataset contained 157, 204 locations reported for 72,533 species. The following species-location interactions from 157, 204 unique locations for 72,533 species were retained in the dataset used for analysis in this manuscript: virus (n = 11725), viroid (n = 141), bacteria (n = 14668), fungi (n = 20512), helminth (n = 4066), protozoan (n = 3113), and other (n = 997). Other species-location interactions (of species with no possible aetiology of human disease, emergence, zoonoses) from 157, 204 unique locations for 72,533 species were discarded including amphibian (n = 3664), arthropods (n = 26487), aves (n = 8358), bryozoa (n = 112), cnidaria (n = 1059), domestic (n = 2391), fish (n = 7872), green algae (n = 944), higher plants (n = 31094), human (n = 1105), mammal (n = 3620), Methanothermobacter (n = 3), mollusca (n = 4002), other plant (n = 3473), porifera (n = 149), primate (n = 396), reptile (n = 3087), rodent (n = 2288), segmented worm (n = 775), and water mould (n = 1047). This resulted in the retention of 55222 unique microbe-location interactions. Note that this dataset was not limited to microbes isolated from animal hosts.

#### **b) Microbe-Vertebrate interactions dataset**

We used the species-species interactions dataset developed by Wardeh and colleagues (Wardeh et al., 2015). This database consisted of 22515 unique interactions between 6314 carrier (host) species and 8905 cargo (microbe) species. These interactions were referred as cargo-carrier interactions where cargo refers to the species that has been isolated from another host species and carrier refers to the host species from which the cargo species has been isolated.

The 22515 species-species interactions were filtered both ways: initially by selecting desired cargoes followed by the selection of the desired carrier species.

Initially, the interactions containing the following microbes (cargo) were retained: virus (n = 4190), viroid (n = 93), bacteria (n = 7963), fungi (n = 2195), helminth (n = 3375), protozoan (n = 1458), and others (n = 71). Other interactions involving cargoes belonging to species with no possible aetiology of human disease, emergence, zoonoses were discarded: arthropod (n = 2762), brown algae (n = 2), bryozoan (n = 2), cnidaria (n = 326), diatom (n = 2), golden algae (n = 1), green algae (n = 8), higher plants (n = 1), mollusca (n = 4), segmented worm (n = 19), and water mould (n = 43). This resulted in the retention of 19345 interactions from 22515 unique cargo-carrier interactions. Note that these interactions were not limited to microbes (cargoes) isolated from animal (carrier) hosts.

Following this, the interactions involving desired host (vertebrate carrier) species such as amphibian (n = 191), aves (n = 1326), domestic animals (n = 3134), fish (n = 2547), human (n = 1631), mammal (n = 1551), others (n = 44), primate (n = 427), reptile (n = 235), and rodent (n = 578) carriers from the above mentioned 19345 unique cargo-carrier interactions were retained.

The interactions involving carrier (non-vertebrate host) species such as other arthropod (n = 2688), bacteria (n = 102), bryozoa (n = 37), fungi (n = 99), green algae (n = 38), helminth (n = 112), higher plants (n = 7106), methanothermobacter (n = 1), mollusca (n = 333), other plant (n = 75), porifera (n = 76), protozoa (n = 34), segmented worm (n = 45), and cnidarian (n = 105) carriers from the remaining 19345 unique cargo-carrier interactions were discarded.

This resulted in the selection of 10406 carriers from 19345 unique cargo-carrier interactions, and were retained. Overall, these procedures resulted in 4468 (vertebrate host) carriers leading to 10406 cargo-carrier interactions. From this dataset, a unique list of 4468 cargo-host names was obtained. These species were only recorded in the above-selected hosts.

#### **c) Microbe-country interactions in vertebrate hosts**

For selection of country-location interactions for the above mentioned 4468 cargo-hosts, we matched the list of 4468 cargo-host names with the 55222-unique microbe-location interactions, and only those representing unique 4468 cargo hosts were retained.

Overall, filtering by country resulted in the selection of 24280 species-country interactions representing the selected cargo interactions. From these 24280 species-country interactions, we removed duplicate rows leading to 13892 unique microbe-country interactions.

### Country-specific parameters

The data for the following (n=49) country-specific variables were recorded.

Table S1. List of country-specific social, environmental and geodemographic variables used in the study.

| Variable                                                                                     | Reference                                                    |
|----------------------------------------------------------------------------------------------|--------------------------------------------------------------|
| Agriculture land (% of land area – 2015 data or most recent)                                 | (WDI, 2017a)                                                 |
| Land area (square km 2017 data)                                                              | (WDI, 2017a)                                                 |
| Mean annual precipitation                                                                    | <b>(Mitchell, Carter, Jones, &amp; Hulme, 2004)</b>          |
| Human development index (HDI) rank                                                           | <b>(UNDP, 2018)</b>                                          |
| Human development index (HDI) value                                                          | <b>(UNDP, 2018)</b>                                          |
| Life expectancy at birth                                                                     | <b>(UNDP, 2018)</b>                                          |
| Expected years of schooling                                                                  | <b>(UNDP, 2018)</b>                                          |
| Mean years of schooling                                                                      | <b>(UNDP, 2018)</b>                                          |
| GNI minus HDI rank                                                                           | <b>(UNDP, 2018)</b>                                          |
| Human population (in millions), 2017                                                         | (WDI, 2017a),<br>(WDI, 2017c)                                |
| Average population growth percent 2000-2017                                                  | (WDI, 2017a)                                                 |
| Gross domestic product (% growth 2017)                                                       | (WDI, 2017c)                                                 |
| Gross domestic product per capita (% growth 2017)                                            | (WDI, 2017c)                                                 |
| Latitude (for the capital of each country)                                                   | (UNDESAPD, 2015)                                             |
| Longitude (for the capital of each country)                                                  | (UNDESAPD, 2015)                                             |
| National biodiversity index                                                                  | (Global biodiversity outlook 1, 2001)                        |
| Exports of goods and services (% of GDP)                                                     | (WDI, 2017a)                                                 |
| Imports of goods and services (% of GDP)                                                     | (WDI, 2017a)                                                 |
| Food imports (% of merchandise imports)                                                      | (WDI, 2017a)                                                 |
| Food exports (% of merchandise exports)                                                      | (WDI, 2017a)                                                 |
| Average precipitation in depth mm per year – 2014 data or most recent                        | (WDI, 2017a)                                                 |
| Forest area (% of land area – 2015 data)                                                     | (WDI, 2017a)                                                 |
| Human population density per square kilometre of the land area – 2017 data (*or most recent) | (WDI, 2017a),<br>(WDI, 2017c)                                |
| Mean annual temperature average                                                              | <b>(Mitchell et al., 2004)</b>                               |
| Gross Domestic Product (GDP) Value (current US \$ 2015 or the most recent value)             | (FAO, 2016)                                                  |
| GDP per capita (2015, or most recent value current US\$ per inhabitant)                      | (FAO, 2016)                                                  |
| Gross National income per capita                                                             | (UNDP, 2018)                                                 |
| Health expenditure (current % of GDP 2015)                                                   | (WDI, 2016)                                                  |
| Health expenditure per capita \$ 2015                                                        | (WDI, 2017a)                                                 |
| Physicians per 1000 people (2008-16)                                                         | (WDI, 2016)                                                  |
| Nurses and midwives per 1,000 people (2008-16)                                               | (WDI, 2016)                                                  |
| Prevalence of undernourishment – per cent of population 2016                                 | (WDI, 2017a)                                                 |
| Crude death rate per 1,000 people                                                            | (WDI, 2017b)                                                 |
| Crude birth rate per 1,000 people                                                            | (WDI, 2017b)                                                 |
| Surface area (square km thousands 2017)                                                      | (WDI, 2017c)                                                 |
| Gross national income (Atlas method (\$ billions 2017)                                       | (WDI, 2017c)                                                 |
| Gross national income per capita, Atlas method (\$ 2017)                                     | (WDI, 2017c)                                                 |
| Cattle population                                                                            | (Gilbert et al., 2018a; Gilbert et al., 2018b, 2018c, 2018d, |

|                                                                                           |                                                                                                                                       |
|-------------------------------------------------------------------------------------------|---------------------------------------------------------------------------------------------------------------------------------------|
| Chicken population                                                                        | 2018e, 2018f, 2018g, 2018h, 2018i)<br>(Gilbert et al., 2018a; Gilbert et al., 2018b, 2018c, 2018d, 2018e, 2018f, 2018g, 2018h, 2018i) |
| Goat population                                                                           | (Gilbert et al., 2018a; Gilbert et al., 2018b, 2018c, 2018d, 2018e, 2018f, 2018g, 2018h, 2018i)                                       |
| Horse population                                                                          | (Gilbert et al., 2018a; Gilbert et al., 2018b, 2018c, 2018d, 2018e, 2018f, 2018g, 2018h, 2018i)                                       |
| Pig population                                                                            | (Gilbert et al., 2018a; Gilbert et al., 2018b, 2018c, 2018d, 2018e, 2018f, 2018g, 2018h, 2018i)                                       |
| Sheep population                                                                          | (Gilbert et al., 2018a; Gilbert et al., 2018b, 2018c, 2018d, 2018e, 2018f, 2018g, 2018h, 2018i)                                       |
| Buffalo population                                                                        | (Gilbert et al., 2018a; Gilbert et al., 2018b, 2018c, 2018d, 2018e, 2018f, 2018g, 2018h, 2018i)                                       |
| Duck population                                                                           | (Gilbert et al., 2018a; Gilbert et al., 2018b, 2018c, 2018d, 2018e, 2018f, 2018g, 2018h, 2018i)                                       |
| National rainfall index (1998-2002)                                                       | (FAO, 2016)                                                                                                                           |
| Multidimensional Poverty index                                                            | <b>(UNDP, 2018)</b>                                                                                                                   |
| Poverty headcount percent                                                                 | <b>(UNDP, 2018)</b>                                                                                                                   |
| Number of poor populations in multidimensional poverty                                    | <b>(UNDP, 2018)</b>                                                                                                                   |
| Gross domestic expenditure research and development (GERD – total in '000 local currency) | (OECD, 2019b)                                                                                                                         |

The GERD National currency unit data was converted into US dollars using National currency units/US dollar, 2018 or latest available data(OECD, 2019a). The National currency units/US dollar for remaining countries was used from world bank data (<https://data.worldbank.org/indicator/pa.nus.fcrf>).

**Table S2. Country-specific parameters, and number of human, emerging, zoonotic, and total pathogens isolated from different countries**

| Country             | Agri land percentage | Land area  | Mean annual precipitation | HDI rank | HDI value | Life expectancy | Expected years schooling | Mean years schooling | GNI minus HDI rank | Human population | Average population growth percent | GDP percent growth | GDP per capita percent growth | Latitude |
|---------------------|----------------------|------------|---------------------------|----------|-----------|-----------------|--------------------------|----------------------|--------------------|------------------|-----------------------------------|--------------------|-------------------------------|----------|
| Afghanistan         | 58.07                | 652860.00  | 311.32                    | 168.00   | 0.50      | 64.00           | 10.40                    | 3.80                 | 0.00               | 35.50            | 3.40                              | 2.60               | 0.10                          | 34.53    |
| Albania             | 42.86                | 27400.00   | 1053.24                   | 68.00    | 0.79      | 78.50           | 14.80                    | 10.00                | 23.00              | 2.90             | -0.40                             | 3.80               | 3.90                          | 41.33    |
| Algeria             | 17.41                | 2381741.00 | 81.97                     | 85.00    | 0.75      | 76.30           | 14.40                    | 8.00                 | -5.00              | 41.30            | 1.70                              | 1.70               | -0.10                         | 36.75    |
| American Samoa      | 24.50                | 200.00     | NA                        | NA       | NA        | NA              | NA                       | NA                   | NA                 | 0.10             | -0.20                             | -2.60              | -2.70                         | -14.28   |
| Andorra             | 40.02                | 470.00     | NA                        | 35.00    | 0.86      | 81.70           | 13.50                    | 10.20                | -18.00             | 0.10             | 1.00                              | 1.90               | 2.30                          | 42.51    |
| Angola              | 47.48                | 1246700.00 | 991.31                    | 147.00   | 0.58      | 61.80           | 11.80                    | 5.10                 | -16.00             | 29.80            | 3.50                              | 0.70               | -2.60                         | -8.84    |
| Antigua And Barbuda | 20.45                | 440.00     | NA                        | 70.00    | 0.78      | 76.50           | 13.20                    | 9.20                 | -12.00             | 0.10             | 1.20                              | 3.30               | 2.30                          | 17.12    |
| Argentina           | 54.34                | 2736690.00 | 559.05                    | 47.00    | 0.83      | 76.70           | 17.40                    | 9.90                 | 19.00              | 44.30            | 1.00                              | 2.90               | 1.90                          | -34.61   |
| Armenia             | 58.88                | 28470.00   | 502.28                    | 83.00    | 0.76      | 74.80           | 13.00                    | 11.70                | 24.00              | 2.90             | -0.30                             | 7.50               | 7.30                          | 40.18    |
| Australia           | 47.63                | 7682300.00 | 473.09                    | 3.00     | 0.94      | 83.10           | 22.90                    | 12.90                | 18.00              | 24.60            | 1.50                              | 2.00               | 0.30                          | -35.28   |
| Austria             | 32.94                | 82523.00   | 1161.18                   | 20.00    | 0.91      | 81.80           | 16.10                    | 12.10                | 0.00               | 8.80             | 0.60                              | 3.00               | 2.20                          | 48.21    |
| Azerbaijan          | 57.70                | 82663.00   | 433.88                    | 80.00    | 0.76      | 72.10           | 12.70                    | 10.70                | -7.00              | 9.90             | 1.20                              | 0.10               | -1.00                         | 40.38    |
| Bahamas             | 1.40                 | 10010.00   | 1280.08                   | 54.00    | 0.81      | 75.80           | 12.80                    | 11.10                | -10.00             | 0.40             | 1.70                              | 1.40               | 0.40                          | 25.06    |

|                      |       |            |         |        |      |       |       |       |        |        |       |      |       |        |
|----------------------|-------|------------|---------|--------|------|-------|-------|-------|--------|--------|-------|------|-------|--------|
| Bahrain              | 11.15 | 771.00     | NA      | 43.00  | 0.85 | 77.00 | 16.00 | 9.40  | -19.00 | 1.50   | 4.80  | 3.90 | -0.80 | 26.22  |
| Bangladesh           | 70.63 | 130170.00  | 2266.52 | 136.00 | 0.61 | 72.80 | 11.40 | 5.80  | 9.00   | 164.70 | 1.30  | 7.30 | 6.20  | 23.71  |
| Barbados             | 32.56 | 430.00     | NA      | 58.00  | 0.80 | 76.10 | 15.30 | 10.60 | 14.00  | 0.30   | 0.30  | 1.70 | 1.40  | 13.10  |
| Belarus              | 42.29 | 202910.00  | 610.07  | 53.00  | 0.81 | 73.10 | 15.50 | 12.30 | 18.00  | 9.50   | -0.30 | 2.40 | 2.40  | 53.90  |
| Belgium              | 43.86 | 30280.00   | 874.30  | 17.00  | 0.92 | 81.30 | 19.80 | 11.80 | 6.00   | 11.40  | 0.60  | 1.70 | 1.40  | 50.85  |
| Belize               | 7.01  | 22810.00   | 2089.26 | 106.00 | 0.71 | 70.60 | 12.80 | 10.50 | 14.00  | 0.40   | 2.40  | 0.90 | -1.20 | 17.25  |
| Benin                | 33.26 | 112760.00  | 1034.27 | 163.00 | 0.52 | 61.20 | 12.60 | 3.60  | 2.00   | 11.20  | 2.90  | 5.60 | 2.70  | 6.37   |
| Bhutan               | 13.79 | 38117.00   | 1780.46 | 134.00 | 0.61 | 70.60 | 12.30 | 3.10  | -21.00 | 0.80   | 2.00  | 6.80 | 5.50  | 27.47  |
| Bolivia              | 34.81 | 1083300.00 | 1095.56 | 118.00 | 0.69 | 69.50 | 14.00 | 8.90  | NA     | 11.10  | 1.70  | 4.20 | 2.70  | -16.50 |
| Bosnia & Herzegovina | 42.64 | 51200.00   | 1071.76 | 77.00  | 0.77 | 77.10 | 14.20 | 9.70  | 16.00  | 3.50   | -0.40 | 3.00 | 3.30  | 43.85  |
| Botswana             | 45.88 | 566730.00  | 394.48  | 101.00 | 0.72 | 67.60 | 12.60 | 9.30  | -26.00 | 2.30   | 1.70  | 2.40 | 0.50  | -24.65 |
| Brazil               | 33.81 | 8358140.00 | 1762.97 | 79.00  | 0.76 | 75.70 | 15.40 | 7.80  | 2.00   | 209.30 | 1.00  | 1.00 | 0.20  | -15.78 |
| Brunei               | 2.73  | 5270.00    | 3160.78 | 39.00  | 0.85 | 77.40 | 14.50 | 9.10  | -35.00 | 0.40   | 1.50  | 1.30 | 0.00  | 4.94   |
| Bulgaria             | 46.17 | 108560.00  | 602.84  | 51.00  | 0.81 | 74.90 | 14.80 | 11.80 | 13.00  | 7.10   | -0.80 | 3.60 | 4.30  | 42.70  |
| Burkina Faso         | 44.23 | 273600.00  | 774.29  | 183.00 | 0.42 | 60.80 | 8.50  | 1.50  | -7.00  | 19.20  | 3.00  | 6.70 | 3.70  | 12.36  |
| Burundi              | 79.13 | 25680.00   | 1262.81 | 185.00 | 0.42 | 57.90 | 11.70 | 3.00  | 4.00   | 10.90  | 3.10  | 0.50 | -2.60 | -3.38  |
| Cambodia             | 30.90 | 176520.00  | 1918.68 | 146.00 | 0.58 | 69.30 | 11.70 | 4.80  | 3.00   | 16.00  | 1.60  | 6.80 | 5.20  | 11.56  |



|                                  |       |                |         |            |      |       |       |       |                |         |       |       |       |        |
|----------------------------------|-------|----------------|---------|------------|------|-------|-------|-------|----------------|---------|-------|-------|-------|--------|
| Cameroon                         | 20.63 | 472710.00      | 1613.07 | 151.0<br>0 | 0.56 | 58.60 | 12.20 | 6.30  | 2.00           | 24.10   | 2.70  | 3.20  | 0.50  | 3.87   |
| Canada                           | 6.89  | 9093510.0<br>0 | 457.47  | 12.00      | 0.93 | 82.50 | 16.40 | 13.30 | 10.0<br>0      | 36.70   | 1.00  | 3.00  | 1.80  | 45.42  |
| Cape Verde                       | 19.60 | 4030.00        | NA      | 125.0<br>0 | 0.65 | 73.00 | 12.60 | 6.10  | 2.00           | 0.50    | 1.30  | 3.90  | 2.60  | 14.92  |
| Central African Republic         | 8.15  | 622980.00      | 1354.67 | 188.0<br>0 | 0.37 | 52.90 | 7.20  | 4.30  | 3.00           | 4.70    | 1.30  | 4.30  | 2.90  | 4.36   |
| Chad                             | 39.66 | 1259200.0<br>0 | 330.51  | 186.0<br>0 | 0.40 | 53.20 | 8.00  | 2.30  | -<br>15.0<br>0 | 14.90   | 3.40  | -3.00 | -5.90 | 12.11  |
| Chile                            | 21.23 | 743532.00      | 631.17  | 44.00      | 0.84 | 79.70 | 16.40 | 10.30 | 13.0<br>0      | 18.10   | 1.00  | 1.50  | 0.70  | -33.46 |
| China                            | 56.22 | 9388211.0<br>0 | 574.77  | 86.00      | 0.75 | 76.40 | 13.80 | 7.80  | -9.00          | 1386.40 | 0.50  | 6.90  | 6.30  | 39.91  |
| Colombia                         | 40.26 | 1109500.0<br>0 | 2618.59 | 90.00      | 0.75 | 74.60 | 14.40 | 8.30  | -4.00          | 49.10   | 1.10  | 1.80  | 0.90  | 4.61   |
| Comoros                          | 71.47 | 1861.00        | 1846.39 | 165.0<br>0 | 0.50 | 63.90 | 11.20 | 4.80  | 15.0<br>0      | 0.80    | 2.40  | 2.50  | 0.20  | -11.70 |
| Costa Rica                       | 35.47 | 51060.00       | 3268.27 | 63.00      | 0.79 | 80.00 | 15.40 | 8.80  | 15.0<br>0      | 4.90    | 1.30  | 3.20  | 2.20  | 9.93   |
| Croatia                          | 27.48 | 55960.00       | 1037.35 | 46.00      | 0.83 | 77.80 | 15.00 | 11.30 | 10.0<br>0      | 4.10    | -0.40 | 2.80  | 4.00  | 45.81  |
| Cuba                             | 59.99 | 104020.00      | 1329.49 | 73.00      | 0.78 | 79.90 | 14.00 | 11.80 | 43.0<br>0      | 11.50   | 0.20  | 4.40  | 4.20  | 23.12  |
| Cyprus                           | 13.77 | 9240.00        | 436.25  | 32.00      | 0.87 | 80.70 | 14.60 | 12.10 | 4.00           | 1.20    | 1.30  | 3.90  | 3.50  | 35.16  |
| Czech Republic                   | 54.56 | 77210.00       | 667.00  | 27.00      | 0.89 | 78.90 | 16.90 | 12.70 | NA             | 10.60   | 0.20  | 4.30  | 4.00  | 50.09  |
| Democratic Republic Of The Congo | 11.56 | 2267050.0<br>0 | 1535.04 | 176.0<br>0 | 0.46 | 60.00 | 9.80  | 6.80  | 12.0<br>0      | 81.30   | 3.20  | 3.70  | 0.40  | -4.33  |
| Denmark                          | 62.18 | 42262.00       | 698.65  | 11.00      | 0.93 | 80.90 | 19.10 | 12.60 | 3.00           | 5.80    | 0.50  | 2.20  | 1.50  | 55.68  |
| Djibouti                         | 73.43 | 23180.00       | 196.19  | 172.0<br>0 | 0.48 | 62.60 | 6.20  | 4.10  | -<br>21.0<br>0 | 1.00    | 1.70  | 4.10  | 2.50  | 11.59  |
| Dominica                         | 33.33 | 750.00         | NA      | 103.0<br>0 | 0.72 | 78.00 | 12.70 | 7.80  | 6.00           | 0.10    | 0.30  | -4.20 | -4.70 | 15.30  |

|                    |       |            |         |        |      |       |       |       |        |        |       |       |        |        |
|--------------------|-------|------------|---------|--------|------|-------|-------|-------|--------|--------|-------|-------|--------|--------|
| Dominican Republic | 48.69 | 48310.00   | 1417.07 | 94.00  | 0.74 | 74.00 | 13.70 | 7.80  | -15.00 | 10.80  | 1.30  | 4.60  | 3.40   | 18.49  |
| East Timor         | 25.55 | 14870.00   | 1239.77 | 132.00 | 0.63 | 69.20 | 12.80 | 4.50  | -10.00 | 1.30   | 2.30  | -8.00 | -10.00 | -8.56  |
| Ecuador            | 23.31 | 248360.00  | 1945.27 | 86.00  | 0.75 | 76.60 | 14.70 | 8.70  | 15.00  | 16.60  | 1.60  | 3.00  | 1.50   | -0.23  |
| Egypt              | 3.84  | 995450.00  | 32.91   | 115.00 | 0.70 | 71.70 | 13.10 | 7.20  | -15.00 | 97.60  | 2.00  | 4.20  | 2.20   | 30.04  |
| El Salvador        | 77.32 | 20720.00   | 1672.81 | 121.00 | 0.67 | 73.80 | 12.60 | 6.90  | 0.00   | 6.40   | 0.50  | 2.30  | 1.80   | 13.69  |
| Equatorial Guinea  | 10.12 | 28050.00   | 2213.31 | 141.00 | 0.59 | 57.90 | 9.30  | 5.50  | -80.00 | 1.30   | 4.30  | -3.20 | -6.70  | 3.75   |
| Eritrea            | 75.17 | 101000.00  | 257.70  | 179.00 | 0.44 | 65.50 | 5.40  | 4.00  | -9.00  | NA     | NA    | NA    | NA     | 15.33  |
| Estonia            | 23.44 | 42390.00   | 629.79  | 30.00  | 0.87 | 77.70 | 16.10 | 12.70 | 10.00  | 1.30   | -0.40 | 4.90  | 4.90   | 59.44  |
| Ethiopia           | 36.26 | 1000000.00 | 830.51  | 173.00 | 0.46 | 65.90 | 8.50  | 2.70  | -1.00  | 105.00 | 2.70  | 10.20 | 7.60   | 9.02   |
| Fiji               | 23.26 | 18270.00   | 2905.11 | 92.00  | 0.74 | 70.40 | 15.30 | 10.80 | 18.00  | 0.90   | 0.60  | 3.80  | 3.00   | -18.14 |
| Finland            | 7.48  | 303890.00  | 524.70  | 15.00  | 0.92 | 81.50 | 17.60 | 12.40 | 10.00  | 5.50   | 0.40  | 2.60  | 2.30   | 60.17  |
| France             | 52.46 | 547557.00  | 838.93  | 24.00  | 0.90 | 82.70 | 16.40 | 11.50 | 2.00   | 67.10  | 0.60  | 1.80  | 1.40   | 48.85  |
| Gabon              | 20.03 | 257670.00  | 1819.44 | 110.00 | 0.70 | 66.50 | 12.80 | 8.20  | -40.00 | 2.00   | 2.90  | 1.10  | -1.20  | 0.39   |
| Gambia             | 59.78 | 10120.00   | 990.48  | 174.00 | 0.46 | 61.40 | 9.20  | 3.50  | 4.00   | 2.10   | 3.10  | 3.50  | 0.40   | 13.45  |
| Georgia            | 36.67 | 69490.00   | 959.44  | 70.00  | 0.78 | 73.40 | 15.00 | 12.80 | 35.00  | 3.70   | -1.00 | 5.00  | 5.00   | 41.69  |
| Germany            | 47.96 | 348900.00  | 713.50  | 5.00   | 0.94 | 81.20 | 17.00 | 14.10 | 13.00  | 82.70  | 0.00  | 2.20  | 1.80   | 52.52  |
| Ghana              | 69.00 | 227540.00  | 1184.94 | 140.00 | 0.59 | 63.00 | 11.60 | 7.10  | 3.00   | 28.80  | 2.50  | 8.50  | 6.10   | 5.56   |

|               |       |           |         |       |      |       |       |       |      |         |       |       |       |       |
|---------------|-------|-----------|---------|-------|------|-------|-------|-------|------|---------|-------|-------|-------|-------|
| Greece        | 60.38 | 128900.00 | 668.22  | 31.00 | 0.87 | 81.40 | 17.30 | 10.80 | 20.0 | 10.80   | 0.00  | 1.40  | 1.50  | 37.95 |
| Grenada       | 23.53 | 340.00    | NA      | 75.00 | 0.77 | 73.80 | 16.90 | 8.70  | 0    | 0.10    | 0.30  | 3.70  | 3.20  | 12.06 |
| Guatemala     | 35.40 | 107160.00 | 2606.33 | 127.0 | 0.65 | 73.70 | 10.80 | 6.50  | 0    | 16.90   | 2.20  | 2.80  | 0.70  | 14.61 |
| Guinea        | 59.01 | 245720.00 | 1693.56 | 175.0 | 0.46 | 60.60 | 9.10  | 2.60  | -    | 12.70   | 2.20  | 8.20  | 5.50  | 9.57  |
| Guinea-Bissau | 57.97 | 28120.00  | 1646.95 | 177.0 | 0.46 | 57.80 | 10.50 | 3.00  | 0    | 1.90    | 2.40  | 5.90  | 3.30  | 11.86 |
| Guyana        | 8.53  | 196850.00 | 2364.69 | 125.0 | 0.65 | 66.80 | 11.40 | 8.40  | 0    | 0.80    | 0.20  | 2.90  | 2.30  | 6.80  |
| Haiti         | 66.76 | 27560.00  | 1480.20 | 168.0 | 0.50 | 63.60 | 9.30  | 5.30  | 0    | 11.00   | 1.50  | 1.20  | -0.10 | 18.54 |
| Honduras      | 28.91 | 111890.00 | 1945.76 | 133.0 | 0.62 | 73.80 | 10.20 | 6.50  | 0    | 9.30    | 2.10  | 4.80  | 3.10  | 14.08 |
| Hong Kong     | 4.86  | 1050.00   | NA      | 7.00  | 0.93 | 84.10 | 16.30 | 12.00 | 0    | 7.40    | 0.60  | 3.80  | 3.00  | 22.28 |
| Hungary       | 59.06 | 90530.00  | 571.75  | 45.00 | 0.84 | 76.10 | 15.10 | 11.90 | 3.00 | 9.80    | -0.30 | 4.00  | 4.30  | 47.50 |
| Iceland       | 18.67 | 100250.00 | 1039.82 | 6.00  | 0.94 | 82.90 | 19.30 | 12.40 | 13.0 | 0.30    | 1.10  | 3.60  | 1.90  | 64.14 |
| India         | 60.45 | 2973190.0 | 1072.22 | 130.0 | 0.64 | 68.80 | 12.30 | 6.40  | 0    | 1339.20 | 1.40  | 6.60  | 5.40  | 28.67 |
| Indonesia     | 31.46 | 1811570.0 | 2801.54 | 116.0 | 0.69 | 69.40 | 12.80 | 8.00  | -    | 264.00  | 1.30  | 5.10  | 3.90  | -6.21 |
| Iran          | 28.21 | 1628760.0 | 227.36  | 60.00 | 0.80 | 76.20 | 14.90 | 9.80  | 0    | 81.20   | 1.20  | 4.30  | 3.20  | 35.69 |
| Iraq          | 21.34 | 434320.00 | 196.34  | 120.0 | 0.69 | 70.00 | 11.00 | 6.80  | -    | 38.30   | 2.90  | -0.80 | -3.60 | 33.34 |
| Ireland       | 64.31 | 68890.00  | 1110.63 | 4.00  | 0.94 | 81.60 | 19.60 | 12.50 | 0    | 4.80    | 1.40  | 7.80  | 6.50  | 53.33 |
| Israel        | 24.67 | 21640.00  | 248.69  | 22.00 | 0.90 | 82.70 | 15.90 | 13.00 | 13.0 | 8.70    | 1.90  | 3.30  | 1.40  | 31.77 |
| Italy         | 44.01 | 294140.00 | 930.19  | 28.00 | 0.88 | 83.20 | 16.30 | 10.20 | 0    | 60.60   | 0.40  | 1.50  | 1.60  | 41.89 |
| Ivory Coast   | 64.78 | 318000.00 | 1356.08 | 170.0 | 0.49 | 54.10 | 9.00  | 5.20  | -    | 24.30   | 2.20  | 7.80  | 5.10  | 5.35  |
|               |       |           |         | 0     |      |       |       |       | 0    |         |       |       |       |       |

|               |       |            |         |        |      |       |       |       |       |        |       |       |       |        |
|---------------|-------|------------|---------|--------|------|-------|-------|-------|-------|--------|-------|-------|-------|--------|
| Jamaica       | 41·00 | 10830·00   | 2114·18 | 97·00  | 0·73 | 76·10 | 13·10 | 9·80  | 17·00 | 2·90   | 0·50  | 0·50  | 0·20  | 18·00  |
| Japan         | 12·33 | 364560·00  | 1603·76 | 19·00  | 0·91 | 83·90 | 15·20 | 12·80 | 9·00  | 126·80 | 0·00  | 1·70  | 1·90  | 35·69  |
| Jordan        | 11·90 | 88780·00   | 102·31  | 95·00  | 0·74 | 74·50 | 13·10 | 10·40 | 16·00 | 9·70   | 3·80  | 2·00  | -0·60 | 31·96  |
| Kazakhstan    | 80·38 | 2699700·00 | 252·26  | 58·00  | 0·80 | 70·00 | 15·10 | 11·80 | -3·00 | 18·00  | 1·10  | 4·00  | 2·60  | 51·18  |
| Kenya         | 48·55 | 569140·00  | 678·11  | 142·00 | 0·59 | 67·30 | 12·10 | 6·50  | 16·00 | 49·70  | 2·70  | 4·90  | 2·30  | -1·28  |
| Kiribati      | 41·98 | 810·00     | NA      | 134·00 | 0·61 | 66·50 | 12·90 | 7·90  | 22·00 | 0·10   | 1·90  | 3·10  | 1·30  | 1·33   |
| Kuwait        | 8·38  | 17820·00   | 108·59  | 56·00  | 0·80 | 74·80 | 13·60 | 7·30  | -     | 4·10   | 4·10  | -2·90 | -4·80 | 29·35  |
| Kyrgyzstan    | 55·04 | 191800·00  | 390·72  | 122·00 | 0·67 | 71·10 | 13·40 | 10·90 | 32·00 | 6·20   | 1·40  | 4·60  | 2·50  | NA     |
| Laos          | 10·26 | 230800·00  | 1758·35 | 139·00 | 0·60 | 67·00 | 11·20 | 5·20  | -     | 6·90   | 1·50  | 6·90  | 5·30  | 17·97  |
| Latvia        | 30·31 | 62180·00   | 638·87  | 41·00  | 0·85 | 74·70 | 15·80 | 12·80 | 8·00  | 1·90   | -1·20 | 4·50  | 5·60  | 56·95  |
| Lebanon       | 64·32 | 10230·00   | 721·11  | 80·00  | 0·76 | 79·80 | 12·50 | 8·70  | 3·00  | 6·10   | 3·70  | 2·00  | 0·80  | 33·90  |
| Lesotho       | 75·01 | 30360·00   | 775·67  | 159·00 | 0·52 | 54·60 | 10·60 | 6·30  | -4·00 | 2·20   | 1·00  | 5·60  | 4·20  | -29·32 |
| Liberia       | 28·03 | 96320·00   | 2460·08 | 181·00 | 0·44 | 63·00 | 10·00 | 4·70  | 9·00  | 4·70   | 2·90  | 2·50  | -0·10 | 6·30   |
| Libya         | 8·72  | 1759540·00 | 45·98   | 108·00 | 0·71 | 72·10 | 13·40 | 7·30  | -     | 6·40   | 1·00  | 26·70 | 25·10 | 32·88  |
| Liechtenstein | 32·25 | 160·00     | NA      | 17·00  | 0·92 | 80·40 | 14·70 | 12·50 | -     | 0·00   | 0·80  | NA    | NA    | 47·14  |
| Lithuania     | 47·98 | 62650·00   | 651·72  | 35·00  | 0·86 | 74·80 | 16·10 | 13·00 | 7·00  | 2·80   | -1·30 | 3·80  | 5·30  | 54·69  |
| Luxembourg    | 50·68 | 2590·00    | 848·81  | 21·00  | 0·90 | 82·00 | 14·00 | 12·10 | -     | 0·60   | 1·90  | 2·30  | -0·70 | 49·61  |
| Macedonia     | 50·08 | 25220·00   | 632·50  | 80·00  | 0·76 | 75·90 | 13·30 | 9·60  | 9·00  | 2·10   | 0·10  | 0·00  | -0·10 | 42·00  |
| Madagascar    | 71·18 | 581800·00  | 1475·68 | 161·00 | 0·52 | 66·30 | 10·60 | 6·10  | 20·00 | 25·60  | 2·80  | 4·20  | 1·40  | -18·91 |

|             |       |                |         |            |      |       |       |       |                |        |       |       |       |        |
|-------------|-------|----------------|---------|------------|------|-------|-------|-------|----------------|--------|-------|-------|-------|--------|
| Malawi      | 61.41 | 94280.00       | 1112.29 | 171.0<br>0 | 0.48 | 63.70 | 10.80 | 4.50  | 14.0<br>0      | 18.60  | 2.90  | 4.00  | 1.00  | -13.97 |
| Malaysia    | 23.86 | 328550.00      | 2992.79 | 57.00      | 0.80 | 75.50 | 13.70 | 10.20 | -<br>11.0<br>0 | 31.60  | 1.80  | 5.90  | 4.40  | 3.14   |
| Maldives    | 26.33 | 300.00         | NA      | 101.0<br>0 | 0.72 | 77.60 | 12.60 | 6.30  | -<br>19.0<br>0 | 0.40   | 2.60  | 8.80  | 6.70  | 4.17   |
| Mali        | 33.77 | 1220190.0<br>0 | 303.01  | 182.0<br>0 | 0.43 | 58.50 | 7.70  | 2.30  | -<br>16.0<br>0 | 18.50  | 3.10  | 5.30  | 2.20  | 12.65  |
| Malta       | 31.97 | 320.00         | NA      | 29.00      | 0.88 | 81.00 | 15.90 | 11.30 | 3.00           | 0.50   | 1.00  | 6.40  | 4.10  | 35.90  |
| Mauritania  | 38.53 | 1030700.0<br>0 | 90.00   | 159.0<br>0 | 0.52 | 63.40 | 8.60  | 4.50  | -<br>13.0<br>0 | 4.40   | 2.90  | 3.50  | 0.70  | 18.09  |
| Mauritius   | 41.87 | 2030.00        | 1953.02 | 65.00      | 0.79 | 74.90 | 15.10 | 9.30  | -6.00          | 1.30   | 0.40  | 3.80  | 3.70  | -20.16 |
| Mexico      | 54.89 | 1943950.0<br>0 | 738.14  | 74.00      | 0.77 | 77.30 | 14.10 | 8.60  | -6.00          | 129.20 | 1.40  | 2.00  | 0.80  | 19.43  |
| Micronesia  | 31.43 | 700.00         | NA      | 131.0<br>0 | 0.63 | 69.30 | 11.70 | 8.00  | 13.0<br>0      | 0.10   | -0.10 | 2.00  | 1.40  | 6.92   |
| Moldova     | 74.81 | 32870.00       | 538.89  | 112.0<br>0 | 0.70 | 71.70 | 11.60 | 11.60 | NA             | 3.50   | -0.10 | 4.50  | 4.60  | 47.01  |
| Mongolia    | 72.67 | 1553560.0<br>0 | 227.23  | 92.00      | 0.74 | 69.50 | 15.50 | 10.10 | 11.0<br>0      | 3.10   | 1.50  | 5.90  | 4.20  | 47.91  |
| Morocco     | 68.54 | 446300.00      | 322.27  | 123.0<br>0 | 0.67 | 76.10 | 12.40 | 5.50  | -5.00          | 35.70  | 1.30  | 4.10  | 2.70  | 34.01  |
| Mozambique  | 63.52 | 786380.00      | 1007.81 | 180.0<br>0 | 0.44 | 58.90 | 9.70  | 3.50  | 4.00           | 29.70  | 2.90  | 3.70  | 0.80  | -25.97 |
| Myanmar     | 19.50 | 653080.00      | 2007.70 | 148.0<br>0 | 0.58 | 66.70 | 10.00 | 4.90  | -<br>15.0<br>0 | 53.40  | 0.90  | 6.40  | 5.40  | 19.75  |
| Namibia     | 47.14 | 823290.00      | 273.83  | 129.0<br>0 | 0.65 | 64.90 | 12.30 | 6.80  | -<br>25.0<br>0 | 2.50   | 1.70  | -0.80 | -2.90 | -22.56 |
| Nepal       | 28.75 | 143350.00      | 1406.41 | 149.0<br>0 | 0.57 | 70.60 | 12.20 | 4.90  | 12.0<br>0      | 29.30  | 1.20  | 7.50  | 6.30  | 27.70  |
| Netherlands | 54.53 | 33690.00       | 766.07  | 10.00      | 0.93 | 82.00 | 18.00 | 12.20 | 5.00           | 17.10  | 0.40  | 3.20  | 2.50  | 52.08  |
| New Zealand | 42.22 | 263310.00      | 1790.95 | 16.00      | 0.92 | 82.00 | 18.90 | 12.50 | 18.0<br>0      | 4.80   | 1.30  | 3.00  | 0.90  | -41.29 |

|                          |       |                |         |            |      |       |       |       |                |        |       |       |       |        |
|--------------------------|-------|----------------|---------|------------|------|-------|-------|-------|----------------|--------|-------|-------|-------|--------|
| Nicaragua                | 42.09 | 120340.00      | 2406.97 | 124.0<br>0 | 0.66 | 75.70 | 12.10 | 6.70  | 14.0<br>0      | 6.20   | 1.30  | 4.90  | 3.70  | 12.13  |
| Niger                    | 36.06 | 1266700.0<br>0 | 160.80  | 189.0<br>0 | 0.35 | 60.40 | 5.40  | 2.00  | -2.00          | 21.50  | 3.80  | 4.90  | 1.00  | 13.51  |
| Nigeria                  | 77.74 | 910770.00      | 1138.53 | 157.0<br>0 | 0.53 | 53.90 | 10.00 | 6.20  | -<br>20.0<br>0 | 190.90 | 2.60  | 0.80  | -1.80 | 9.06   |
| North<br>Korea           | 21.84 | 120410.00      | 1110.43 | NA         | NA   | 71.90 | 12.00 | NA    | NA             | 25.50  | 0.60  | NA    | NA    | 39.03  |
| Norway                   | 2.70  | 365245.00      | 1051.84 | 1.00       | 0.95 | 82.30 | 17.90 | 12.60 | 5.00           | 5.30   | 1.00  | 1.90  | 1.00  | 59.91  |
| Oman                     | 4.75  | 309500.00      | 88.21   | 48.00      | 0.82 | 77.30 | 13.90 | 9.50  | -<br>19.0<br>0 | 4.60   | 4.20  | -0.30 | -4.80 | 23.61  |
| Pakistan                 | 47.03 | 770880.00      | 301.02  | 150.0<br>0 | 0.56 | 66.60 | 8.60  | 5.20  | -<br>14.0<br>0 | 197.00 | 2.10  | 5.70  | 3.70  | 33.70  |
| Palau                    | 10.87 | 460.00         | NA      | 60.00      | 0.80 | 73.40 | 15.60 | 12.30 | 28.0<br>0      | 0.00   | 0.70  | -3.70 | -4.70 | 7.34   |
| Panama                   | 30.36 | 74340.00       | 2487.03 | 66.00      | 0.79 | 78.20 | 12.70 | 10.20 | -4.00          | 4.10   | 1.80  | 5.40  | 3.70  | 9.00   |
| Papua New<br>Guinea      | 2.63  | 452860.00      | 3106.06 | 153.0<br>0 | 0.54 | 65.70 | 10.00 | 4.60  | -3.00          | 8.30   | 2.30  | 2.20  | 0.10  | -9.44  |
| Paraguay                 | 55.08 | 397300.00      | 1093.89 | 110.0<br>0 | 0.70 | 73.20 | 12.70 | 8.40  | -2.00          | 6.80   | 1.50  | 0.80  | -0.50 | -25.30 |
| Peru                     | 19.01 | 1280000.0<br>0 | 1513.24 | 89.00      | 0.75 | 75.20 | 13.80 | 9.20  | 3.00           | 32.20  | 1.30  | 2.50  | 1.30  | -12.04 |
| Philippines              | 41.72 | 298170.00      | 2317.59 | 113.0<br>0 | 0.70 | 69.20 | 12.60 | 9.30  | -7.00          | 104.90 | 1.70  | 6.70  | 5.10  | 14.60  |
| Poland                   | 46.93 | 306190.00      | 600.66  | 33.00      | 0.87 | 77.80 | 16.40 | 12.30 | 12.0<br>0      | 38.00  | 0.00  | 4.60  | 4.50  | 52.23  |
| Portugal                 | 40.39 | 91605.00       | 835.35  | 41.00      | 0.85 | 81.40 | 16.30 | 9.20  | 2.00           | 10.30  | 0.00  | 2.70  | 3.00  | 38.72  |
| Puerto Rico              | 22.29 | 8870.00        | 2126.02 | NA         | NA   | NA    | NA    | NA    | NA             | 3.30   | -0.80 | -2.60 | -0.70 | 18.47  |
| Qatar                    | 5.65  | 11610.00       | 65.22   | 37.00      | 0.86 | 78.30 | 13.40 | 9.80  | -<br>36.0<br>0 | 2.60   | 8.80  | 1.60  | -1.10 | 25.27  |
| Republic of<br>The Congo | 31.12 | 341500.00      | 1635.05 | 137.0<br>0 | 0.61 | 65.10 | 11.40 | 6.30  | -5.00          | 5.30   | 2.90  | -4.60 | -7.00 | -4.27  |
| Romania                  | 60.13 | 230080.00      | 642.21  | 52.00      | 0.81 | 75.60 | 14.30 | 11.00 | 2.00           | 19.60  | -0.80 | 6.90  | 7.60  | 44.43  |
| Russia                   | 13.29 | 16376870.00    | 434.80  | 49.00      | 0.82 | 71.20 | 15.50 | 12.00 | 3.00           | 144.50 | -0.10 | 1.50  | 40.70 | 55.75  |

|                                           |       |                |         |            |      |       |       |       |                |       |       |       |       |        |
|-------------------------------------------|-------|----------------|---------|------------|------|-------|-------|-------|----------------|-------|-------|-------|-------|--------|
| Rwanda                                    | 73.44 | 24670.00       | 1162.80 | 158.0<br>0 | 0.52 | 67.50 | 11.20 | 4.10  | 11.0<br>0      | 12.20 | 2.50  | 6.10  | 3.60  | -1.95  |
| Saint Kitts<br>And Nevis                  | 23.08 | 260.00         | NA      | 72.00      | 0.78 | 74.40 | 14.40 | 8.40  | -<br>19.0<br>0 | 0.10  | 1.20  | 1.70  | 0.80  | 17.29  |
| Saint Lucia                               | 17.38 | 610.00         | NA      | 90.00      | 0.75 | 75.70 | 13.60 | 8.90  | 4.00           | 0.20  | 0.80  | 2.70  | 2.20  | 14.01  |
| Saint<br>Vincent and<br>the<br>Grenadines | 25.64 | 390.00         | 1585.97 | 99.00      | 0.72 | 73.30 | 13.30 | 8.60  | 0.00           | 0.10  | 0.10  | 1.60  | 1.40  | 13.16  |
| Samoa                                     | 12.37 | 2830.00        | NA      | 104.0<br>0 | 0.71 | 75.20 | 12.50 | 10.30 | 24.0<br>0      | 0.20  | 0.70  | 2.50  | 1.80  | -13.83 |
| Sao Tome<br>and<br>Principe               | 50.73 | 960.00         | NA      | 143.0<br>0 | 0.59 | 66.80 | 12.50 | 6.30  | 16.0<br>0      | 0.20  | 2.30  | 3.90  | 1.60  | 0.34   |
| Saudi<br>Arabia                           | 80.78 | 2149690.0<br>0 | 73.40   | 39.00      | 0.85 | 74.70 | 16.90 | 9.50  | -<br>26.0<br>0 | 32.90 | 2.70  | -0.70 | -2.70 | 24.69  |
| Senegal                                   | 46.06 | 192530.00      | 701.10  | 164.0<br>0 | 0.51 | 67.50 | 9.70  | 3.00  | -2.00          | 15.90 | 2.80  | 6.80  | 3.80  | 14.69  |
| Serbia                                    | 39.66 | 87460.00       | 726.46  | 67.00      | 0.79 | 75.30 | 14.60 | 11.10 | 18.0<br>0      | 7.00  | -0.40 | 1.90  | 2.40  | 44.82  |
| Seychelles                                | 3.37  | 460.00         | NA      | 62.00      | 0.80 | 73.70 | 14.80 | 9.50  | -<br>15.0<br>0 | 0.10  | 1.00  | 4.20  | 2.90  | -4.62  |
| Sierra<br>Leone                           | 54.71 | 72180.00       | 2471.72 | 184.0<br>0 | 0.42 | 52.20 | 9.80  | 3.50  | -2.00          | 7.60  | 3.00  | 4.20  | 1.90  | 8.48   |
| Singapore                                 | 0.93  | 709.00         | NA      | 9.00       | 0.93 | 83.20 | 16.20 | 11.50 | -6.00          | 5.60  | 2.00  | 3.60  | 3.50  | 1.29   |
| Slovakia                                  | 39.97 | 48086.00       | 767.52  | 38.00      | 0.86 | 77.00 | 15.00 | 12.50 | NA             | 5.40  | 0.10  | 3.40  | 3.20  | 48.15  |
| Slovenia                                  | 30.62 | 20140.00       | 1361.81 | 25.00      | 0.90 | 81.10 | 17.20 | 12.20 | 12.0<br>0      | 2.10  | 0.20  | 5.00  | 4.90  | 46.05  |
| Solomon<br>Islands                        | 3.86  | 27990.00       | 3157.37 | 152.0<br>0 | 0.55 | 71.00 | 10.20 | 5.50  | 15.0<br>0      | 0.60  | 2.30  | 3.20  | 1.20  | -9.43  |
| Somalia                                   | 70.34 | 627340.00      | 265.35  | NA         | NA   | 56.70 | NA    | NA    | NA             | 14.70 | 2.90  | NA    | NA    | 2.04   |
| South<br>Africa                           | 79.83 | 1213090.0<br>0 | 474.78  | 113.0<br>0 | 0.70 | 63.40 | 13.30 | 10.10 | -<br>23.0<br>0 | 56.70 | 1.30  | 1.30  | 0.10  | -33.93 |
| South<br>Korea                            | 17.81 | 97480.00       | 1344.73 | 22.00      | 0.90 | 82.40 | 16.50 | 12.10 | 8.00           | 51.50 | 0.50  | 3.10  | 2.60  | 37.57  |

|                     |       |                |         |            |      |       |       |       |                |       |      |        |        |        |
|---------------------|-------|----------------|---------|------------|------|-------|-------|-------|----------------|-------|------|--------|--------|--------|
| South Sudan         | NA    | NA             | 956.58  | 187.0<br>0 | 0.39 | 57.30 | 4.90  | 4.80  | -1.00          | 12.60 | 3.70 | -13.80 | -16.30 | 4.85   |
| Spain               | 52.51 | 500210.00      | 622.99  | 26.00      | 0.89 | 83.30 | 17.90 | 9.80  | 7.00           | 46.60 | 0.80 | 3.10   | 2.90   | 40.42  |
| Sri Lanka           | 43.69 | 62710.00       | 1699.41 | 76.00      | 0.77 | 75.50 | 13.90 | 10.90 | 19.0<br>0      | 21.40 | 0.80 | 3.10   | 2.00   | 6.93   |
| Sudan               | 28.70 | 2376000.0<br>0 | 234.04  | 167.0<br>0 | 0.50 | 64.70 | 7.40  | 3.70  | -<br>25.0<br>0 | 40.50 | 2.30 | 4.30   | 1.80   | 15.55  |
| Suriname            | 0.57  | 156000.00      | 2316.81 | 100.0<br>0 | 0.72 | 71.50 | 12.70 | 8.50  | -<br>16.0<br>0 | 0.60  | 1.00 | 0.10   | -0.80  | 5.87   |
| Swaziland           | 71.05 | 17200.00       | 798.37  | 144.0<br>0 | 0.59 | 58.30 | 11.20 | 6.50  | -<br>29.0<br>0 | 1.40  | 1.50 | 2.00   | 0.20   | -26.32 |
| Sweden              | 7.46  | 407310.00      | 621.15  | 7.00       | 0.93 | 82.60 | 17.60 | 12.40 | 9.00           | 10.10 | 0.70 | 2.30   | 0.80   | 59.33  |
| Switzerland         | 38.18 | 39516.00       | 1646.41 | 2.00       | 0.94 | 83.50 | 16.20 | 13.40 | 8.00           | 8.50  | 1.00 | 1.10   | 0.00   | 46.95  |
| Syria               | 75.81 | 183630.00      | 296.37  | 155.0<br>0 | 0.54 | 71.00 | 8.80  | 5.10  | 8.00           | 18.30 | 0.60 | NA     | NA     | 33.51  |
| Tajikistan          | 34.19 | 138786.00      | 492.02  | 127.0<br>0 | 0.65 | 71.20 | 11.20 | 10.40 | 25.0<br>0      | 8.90  | 2.10 | 7.10   | 4.90   | 38.54  |
| Tanzania            | 44.76 | 885800.00      | 1052.38 | 154.0<br>0 | 0.54 | 66.30 | 8.90  | 5.80  | NA             | 57.30 | 3.00 | 7.10   | 3.90   | -6.17  |
| Thailand            | 43.28 | 510890.00      | 1532.48 | 83.00      | 0.76 | 75.50 | 14.70 | 7.60  | -7.00          | 69.00 | 0.50 | 3.90   | 3.60   | 13.72  |
| Togo                | 70.23 | 54390.00       | 1189.11 | 165.0<br>0 | 0.50 | 60.50 | 12.40 | 4.80  | 14.0<br>0      | 7.80  | 2.60 | 5.60   | 3.00   | 6.14   |
| Tonga               | 45.83 | 720.00         | NA      | 98.00      | 0.73 | 73.20 | 14.30 | 11.20 | 37.0<br>0      | 0.10  | 0.60 | 2.70   | 1.80   | -21.14 |
| Trinidad and Tobago | 10.53 | 5130.00        | 1831.41 | 69.00      | 0.78 | 70.80 | 12.90 | 10.90 | -<br>28.0<br>0 | 1.40  | 0.50 | -2.30  | -2.60  | 10.67  |
| Tunisia             | 64.84 | 155360.00      | 267.09  | 95.00      | 0.74 | 75.90 | 15.10 | 7.20  | 7.00           | 11.50 | 1.00 | 2.00   | 0.80   | 36.82  |
| Turkey              | 50.08 | 769630.00      | 573.28  | 64.00      | 0.79 | 76.00 | 15.20 | 8.00  | -<br>14.0<br>0 | 80.70 | 1.40 | 7.40   | 5.80   | 39.92  |
| Turkmenistan        | 72.01 | 469930.00      | 156.75  | 108.0<br>0 | 0.71 | 68.00 | 10.80 | 9.80  | -<br>34.0<br>0 | 5.80  | 1.40 | 6.50   | 4.70   | 37.95  |
| Uganda              | 71.89 | 200520.00      | 1207.90 | 162.0<br>0 | 0.52 | 60.20 | 11.60 | 6.10  | 13.0<br>0      | 42.90 | 3.40 | 4.00   | 0.60   | 0.32   |



|                      |       |           |         |       |      |       |       |       |       |        |       |        |        |        |
|----------------------|-------|-----------|---------|-------|------|-------|-------|-------|-------|--------|-------|--------|--------|--------|
| Ukraine              | 71.25 | 579290.00 | 561.79  | 88.00 | 0.75 | 72.10 | 15.00 | 11.30 | 24.0  | 44.80  | -0.50 | 2.50   | 3.00   | 50.45  |
| United Arab Emirates | 4.57  | 83600.00  | 67.81   | 34.00 | 0.86 | 77.40 | 13.60 | 10.80 | -     | 9.40   | 6.40  | 0.80   | -0.60  | 24.46  |
| United Kingdom       | 70.84 | 241930.00 | 1154.30 | 14.00 | 0.92 | 81.70 | 17.40 | 12.90 | 13.0  | 66.00  | 0.70  | 1.80   | 1.10   | 51.51  |
| United States        | 44.37 | 9147420.0 | 654.54  | 13.00 | 0.92 | 79.50 | 16.50 | 13.40 | -2.00 | 325.70 | 0.80  | 2.30   | 1.50   | 38.90  |
| Uruguay              | 82.56 | 175020.00 | 1250.48 | 55.00 | 0.80 | 77.60 | 15.90 | 8.70  | 5.00  | 3.50   | 0.20  | 2.70   | 2.30   | -34.83 |
| Uzbekistan           | 62.93 | 425400.00 | 191.82  | 105.0 | 0.71 | 71.40 | 12.00 | 11.50 | 19.0  | 32.40  | 1.60  | 5.30   | 3.50   | 41.26  |
| Vanuatu              | 15.34 | 12190.00  | 2662.11 | 138.0 | 0.60 | 72.30 | 10.90 | 6.80  | 19.0  | 0.30   | 2.40  | 4.50   | 2.30   | -17.73 |
| Venezuela            | 24.49 | 882050.00 | 1957.65 | 78.00 | 0.76 | 74.70 | 14.30 | 10.30 | 20.0  | 32.00  | 1.60  | NA     | NA     | 10.49  |
| Vietnam              | 37.77 | 310070.00 | 1835.16 | 116.0 | 0.69 | 76.50 | 12.70 | 8.20  | 14.0  | 95.50  | 1.00  | 6.80   | 5.70   | 21.02  |
| Yemen                | 44.60 | 527970.00 | 166.54  | 178.0 | 0.45 | 65.20 | 9.00  | 3.00  | 5.00  | 28.30  | 2.70  | -34.30 | -35.90 | 15.35  |
| Zambia               | 32.06 | 743390.00 | 1004.75 | 144.0 | 0.59 | 62.30 | 12.50 | 7.00  | 3.00  | 17.10  | 2.80  | 4.10   | 1.00   | -15.41 |
| Zimbabwe             | 41.88 | 386850.00 | 668.97  | 156.0 | 0.54 | 61.70 | 10.30 | 8.10  | 17.0  | 16.50  | 1.80  | 3.40   | 1.10   | -17.83 |

| Country             | Longitude | Buffalo population | Duck population | National Diversity Index | Number poor | Exports percent GDP | Imports percent GDP | Food import percent | Food exports percent | Average ppt | Forest area percent | Human population density | Mean annual temperature average | GDP value       |
|---------------------|-----------|--------------------|-----------------|--------------------------|-------------|---------------------|---------------------|---------------------|----------------------|-------------|---------------------|--------------------------|---------------------------------|-----------------|
| Afghanistan         | 69.17     | NA                 | 387038.00       | 0.46                     | 19442.00    | 6.90                | 49.02               | 23.56               | 56.92                | 327.00      | 2.07                | 54.42                    | 12.92                           | 1920000000.00   |
| Albania             | 19.82     | NA                 | 1044268.00      | 0.53                     | 60.00       | 31.52               | 46.55               | 14.52               | 9.20                 | 1485.00     | 28.16               | 104.87                   | 11.27                           | 1150000000.00   |
| Algeria             | 3.04      | NA                 | NA              | 0.31                     | 858.00      | 24.03               | 36.34               | 20.24               | 0.98                 | 89.00       | 0.82                | 17.35                    | 22.58                           | 16700000000.00  |
| American Samoa      | -170.70   | NA                 | NA              | NA                       | NA          | 65.05               | 93.47               | NA                  | NA                   | NA          | 87.70               | 278.21                   | NA                              | NA              |
| Andorra             | 1.52      | NA                 | NA              | NA                       | NA          | NA                  | NA                  | 23.63               | 1.01                 | NA          | 34.04               | 163.76                   | NA                              | 325000000.00    |
| Angola              | 13.23     | NA                 | NA              | 0.64                     | 14743.00    | 29.94               | 27.65               | 15.68               | 0.14                 | 1010.00     | 46.41               | 23.89                    | 21.51                           | 10300000000.00  |
| Antigua And Barbuda | -61.85    | NA                 | NA              | NA                       | NA          | 41.70               | 47.03               | 17.60               | 7.44                 | 1030.00     | 22.27               | 231.85                   | NA                              | 130000000.00    |
| Argentina           | -58.40    | 82094.00           | NA              | 0.62                     | NA          | 11.18               | 13.84               | 4.18                | 62.23                | 591.00      | 9.91                | 16.18                    | 14.22                           | 54800000000.00  |
| Armenia             | 44.51     | NA                 | NA              | 0.56                     | 5.00        | 38.05               | 50.40               | 18.39               | 32.70                | 562.00      | 11.66               | 102.93                   | 6.37                            | 1060000000.00   |
| Australia           | 149.13    | 4414.00            | 1004462.00      | 0.85                     | NA          | 21.27               | 20.62               | 6.62                | 14.94                | 534.00      | 16.24               | 3.20                     | 21.51                           | 134000000000.00 |
| Austria             | 16.37     | NA                 | 46225.00        | 0.47                     | NA          | 53.94               | 50.77               | 8.09                | 7.70                 | 1110.00     | 46.88               | 106.75                   | 6.19                            | 37400000000.00  |
| Azerbaijan          | 49.89     | 265922.00          | NA              | 0.53                     | 477.00      | 48.69               | 41.98               | 18.93               | 4.78                 | 447.00      | 13.78               | 119.31                   | 12.22                           | 5300000000.00   |
| Bahamas             | -77.34    | NA                 | NA              | 0.44                     | NA          | 33.65               | 41.81               | 19.33               | 28.30                | 1292.00     | 51.45               | 39.50                    | 25.06                           | 888000000.00    |
| Bahrain             | 50.58     | NA                 | NA              | NA                       | NA          | 73.97               | 65.59               | 12.04               | 2.56                 | 83.00       | 0.78                | 1935.91                  | NA                              | 3220000000.00   |
| Bangladesh          | 90.41     | 541184.00          | 39006200.00     | 0.54                     | 66916.00    | 15.04               | 20.27               | 16.56               | 2.71                 | 2666.00     | 10.98               | 1265.04                  | 25.47                           | 19500000000.00  |
| Barbados            | -59.62    | NA                 | NA              | NA                       | 7.00        | 37.00               | 43.71               | 21.95               | 36.77                | 1422.00     | 14.65               | 664.46                   | NA                              | 445000000.00    |
| Belarus             | 27.57     | NA                 | 1201159.00      | 0.37                     | NA          | 66.60               | 66.95               | 13.85               | 17.06                | 618.00      | 42.55               | 46.86                    | 6.29                            | 5460000000.00   |

|                          |        |            |            |      |          |       |       |       |       |         |       |        |       |                 |
|--------------------------|--------|------------|------------|------|----------|-------|-------|-------|-------|---------|-------|--------|-------|-----------------|
| Belgium                  | 4.35   | NA         | 229180.00  | 0.45 | NA       | 85.05 | 84.35 | 9.66  | 10.17 | 847.00  | 22.57 | 375.56 | 9.51  | 45400000000.00  |
| Belize                   | -88.77 | 26.00      | 5307.00    | 0.64 | 16.00    | 52.01 | 60.83 | 20.53 | 84.58 | 1705.00 | 59.90 | 16.43  | 25.06 | 1760000000.00   |
| Benin                    | 2.42   | NA         | NA         | 0.62 | 6875.00  | 30.93 | 48.45 | 48.97 | 33.43 | 1039.00 | 38.23 | 99.11  | 27.46 | 8480000000.00   |
| Bhutan                   | 89.64  | 737.00     | NA         | 0.61 | 298.00   | 26.04 | 47.99 | 13.72 | 6.94  | 2200.00 | 72.28 | 21.19  | 8.58  | 1960000000.00   |
| Bolivia                  | -68.15 | NA         | NA         | 0.72 | 2227.00  | 24.90 | 31.80 | 8.34  | 15.50 | 1146.00 | 50.55 | 10.20  | 20.98 | 33200000000.00  |
| Bosnia And Herzegovina   | 18.36  | NA         | NA         | 0.53 | 77.00    | 35.97 | 50.96 | 17.01 | 8.65  | 1028.00 | 42.68 | 68.50  | 9.02  | 1600000000.00   |
| Botswana                 | 25.91  | NA         | NA         | 0.46 | NA       | 55.11 | 42.02 | 12.57 | 1.77  | 416.00  | 19.13 | 4.04   | 21.48 | 1440000000.00   |
| Brazil                   | -47.93 | 1261958.00 | 3715759.00 | 0.88 | 7978.00  | 12.57 | 11.55 | 6.58  | 36.11 | 1761.00 | 59.05 | 25.04  | 24.92 | 177000000000.00 |
| Brunei                   | 114.95 | NA         | NA         | 0.78 | NA       | 49.57 | 35.60 | 14.96 | 0.19  | 2722.00 | 72.11 | 81.35  | 25.93 | 15500000000.00  |
| Bulgaria                 | 23.32  | 9542.00    | 1280984.00 | 0.49 | NA       | 66.33 | 64.80 | 10.05 | 15.01 | 608.00  | 35.22 | 65.18  | 10.40 | 4900000000.00   |
| Burkina Faso             | -1.54  | NA         | 211828.00  | 0.53 | 15665.00 | 28.45 | 34.38 | 13.68 | 33.37 | 748.00  | 19.55 | 70.15  | 28.18 | 1110000000.00   |
| Burundi                  | 29.36  | NA         | NA         | 0.68 | 7823.00  | 6.24  | 31.92 | 19.40 | 78.83 | 1274.00 | 10.75 | 423.06 | 20.27 | 3090000000.00   |
| Cambodia                 | 104.92 | 672727.00  | 5157821.00 | 0.57 | 5499.00  | 60.73 | 64.16 | 7.28  | 4.59  | 1904.00 | 53.57 | 90.67  | 26.94 | 1800000000.00   |
| Cameroon                 | 11.52  | NA         | 194579.00  | 0.69 | 10641.00 | 16.96 | 19.98 | 21.95 | 45.13 | 1604.00 | 39.80 | 50.88  | 24.53 | 2920000000.00   |
| Canada                   | -75.70 | 83935.00   | 1072653.00 | 0.30 | NA       | 30.89 | 33.17 | 8.32  | 12.90 | 537.00  | 38.17 | 4.04   | -7.14 | 155000000000.00 |
| Cape Verde               | -23.51 | NA         | NA         | NA   | NA       | 39.13 | 63.94 | 30.10 | 77.32 | 228.00  | 22.31 | 135.58 | NA    | 1630000000.00   |
| Central African Republic | 18.55  | NA         | NA         | 0.51 | 3646.00  | 12.52 | 31.77 | 15.92 | 0.35  | 1343.00 | 35.59 | 7.48   | 24.84 | 1500000000.00   |
| Chad                     | 15.04  | NA         | NA         | 0.36 | 12409.00 | 33.85 | 39.68 | NA    | NA    | 322.00  | 3.87  | 11.83  | 26.65 | 10900000000.00  |

|                                  |        |             |               |      |          |       |       |       |       |         |       |        |       |                  |
|----------------------------------|--------|-------------|---------------|------|----------|-------|-------|-------|-------|---------|-------|--------|-------|------------------|
| Chile                            | -70.65 | NA          | NA            | 0.57 | NA       | 28.70 | 26.99 | 10.03 | 23.99 | 1522.00 | 23.85 | 24.28  | 8.37  | 24000000000.00   |
| China                            | 116.40 | 22723012.00 | 1950801879.00 | 0.84 | 57629.00 | 19.76 | 18.05 | 6.53  | 3.15  | 645.00  | 22.19 | 147.67 | 6.33  | 1090000000000.00 |
| Colombia                         | -74.08 | 188079.00   | 575056.00     | 0.94 | 2448.00  | 14.77 | 20.09 | 13.04 | 18.33 | 3240.00 | 52.73 | 44.22  | 24.40 | 292000000000.00  |
| Comoros                          | 43.26  | NA          | NA            | NA   | 297.00   | 17.70 | 44.20 | 31.45 | 78.21 | 900.00  | 19.88 | 437.35 | 23.99 | 624000000.00     |
| Costa Rica                       | -84.08 | NA          | NA            | 0.82 | NA       | 34.15 | 33.42 | 13.25 | 44.43 | 2926.00 | 53.98 | 96.08  | 23.85 | 51100000000.00   |
| Croatia                          | 15.98  | NA          | NA            | 0.54 | NA       | 51.26 | 49.10 | 13.02 | 13.38 | 1113.00 | 34.35 | 73.73  | 10.47 | 48700000000.00   |
| Cuba                             | -82.38 | NA          | NA            | 0.70 | NA       | 17.15 | 14.45 | 11.92 | 10.46 | 1335.00 | 30.76 | 110.41 | 25.13 | 77100000000.00   |
| Cyprus                           | 33.37  | NA          | 2784.00       | 0.45 | NA       | 63.82 | 67.79 | 14.09 | 27.62 | 498.00  | 18.69 | 127.66 | 18.71 | 19300000000.00   |
| Czech Republic                   | 14.42  | NA          | 337726.00     | 0.50 | NA       | 79.45 | 72.24 | 5.80  | 4.57  | 677.00  | 34.54 | 137.18 | 7.67  | 18200000000.00   |
| Democratic Republic Of The Congo | 15.31  | NA          | NA            | 0.65 | 57050.00 | 35.60 | 39.43 | NA    | NA    | 1543.00 | 67.30 | 35.88  | 24.04 | 35200000000.00   |
| Denmark                          | 12.57  | NA          | 223663.00     | 0.40 | NA       | 55.21 | 48.15 | 13.87 | 20.36 | 703.00  | 14.58 | 136.52 | 7.82  | 29500000000.00   |
| Djibouti                         | 43.14  | NA          | NA            | 0.43 | 326.00   | 34.23 | 74.26 | 29.32 | 0.43  | 220.00  | 0.24  | 41.28  | 27.64 | 1590000000.00    |
| Dominica                         | -61.39 | NA          | NA            | NA   | NA       | 44.21 | 56.21 | 24.93 | 13.74 | 2083.00 | 57.77 | 98.57  | NA    | 538000000.00     |
| Dominican Republic               | -69.90 | NA          | NA            | 0.66 | 441.00   | 24.83 | 28.09 | 15.06 | 27.76 | 1410.00 | 41.05 | 222.87 | 23.93 | 67100000000.00   |
| East Timor                       | 125.57 | NA          | NA            | NA   | 584.00   | 2.28  | 36.99 | 14.36 | 30.49 | 1500.00 | 46.13 | 87.18  | 24.97 | 1410000000.00    |
| Ecuador                          | -78.52 | 3396.00     | 351945.00     | 0.87 | 736.00   | 20.76 | 21.28 | 10.21 | 50.27 | 2274.00 | 50.52 | 66.94  | 21.33 | 101000000000.00  |
| Egypt                            | 31.24  | 3818242.00  | 4658920.00    | 0.33 | 4992.00  | 16.30 | 28.49 | 19.23 | 18.78 | 51.00   | 0.07  | 98.00  | 22.12 | 331000000000.00  |
| El Salvador                      | -89.19 | NA          | 3696.00       | 0.62 | 504.00   | 27.64 | 44.91 | 16.91 | 18.69 | 1784.00 | 12.79 | 307.81 | 24.77 | 25900000000.00   |

|                   |        |          |             |      |          |       |        |       |       |         |       |        |       |                 |
|-------------------|--------|----------|-------------|------|----------|-------|--------|-------|-------|---------|-------|--------|-------|-----------------|
| Equatorial Guinea | 8.78   | NA       | NA          | 0.71 | NA       | 56.53 | 37.88  | NA    | NA    | 2156.00 | 55.90 | 45.19  | 24.13 | 940000000.00    |
| Eritrea           | 38.93  | NA       | NA          | 0.59 | NA       | NA    | 23.15  | 45.55 | 41.99 | 384.00  | 14.95 | 44.30  | 26.07 | 261000000.00    |
| Estonia           | 24.75  | NA       | 13716.00    | 0.44 | NA       | 78.03 | 73.55  | 10.92 | 10.14 | 626.00  | 52.65 | 31.03  | 5.03  | 2270000000.00   |
| Ethiopia          | 38.75  | NA       | NA          | 0.59 | 85834.00 | 7.74  | 23.71  | 8.41  | 83.82 | 848.00  | 12.50 | 104.96 | 22.37 | 6150000000.00   |
| Fiji              | 178.44 | NA       | 71985.00    | 0.52 | NA       | 26.41 | 51.58  | 18.30 | 72.63 | 2592.00 | 55.68 | 49.56  | 23.37 | 439000000.00    |
| Finland           | 24.94  | NA       | NA          | 0.29 | NA       | 38.59 | 38.13  | 8.02  | 2.57  | 536.00  | 73.11 | 18.14  | 1.35  | 23000000000.00  |
| France            | 2.35   | NA       | 25344000.00 | 0.42 | NA       | 30.88 | 31.98  | 9.81  | 12.44 | 867.00  | 31.03 | 122.58 | 10.54 | 242000000000.00 |
| Gabon             | 9.45   | NA       | NA          | 0.64 | 298.00   | 43.74 | 26.75  | 17.14 | 0.76  | 1831.00 | 89.26 | 7.86   | 25.00 | 1430000000.00   |
| Gambia            | -16.68 | NA       | NA          | 0.60 | 1127.00  | 20.81 | 39.98  | 43.05 | 66.36 | 836.00  | 48.22 | 207.57 | 26.77 | 85100000.00     |
| Georgia           | 44.83  | 29541.00 | NA          | 0.55 | NA       | 50.41 | 62.17  | 14.13 | 31.17 | 1026.00 | 40.62 | 65.03  | 7.36  | 1400000000.00   |
| Germany           | 13.41  | 5850.00  | 2184400.00  | 0.37 | NA       | 47.24 | 39.66  | 8.11  | 5.64  | 700.00  | 32.73 | 237.02 | 8.50  | 336000000000.00 |
| Ghana             | -0.20  | NA       | 330045.00   | 0.65 | 8158.00  | 39.92 | 50.72  | 14.60 | 51.29 | 1187.00 | 41.03 | 126.72 | 27.25 | 3790000000.00   |
| Greece            | 23.75  | 3716.00  | 58202.00    | 0.55 | NA       | 33.22 | 34.30  | 13.48 | 19.78 | 652.00  | 31.45 | 83.48  | 13.66 | 19500000000.00  |
| Grenada           | -61.75 | NA       | NA          | NA   | NA       | 56.10 | 52.36  | 24.09 | 58.41 | 2350.00 | 49.97 | 317.13 | NA    | 97800000.00     |
| Guatemala         | -90.53 | 1948.00  | 296148.00   | 0.74 | 4821.00  | 18.80 | 26.86  | 14.70 | 45.01 | 1996.00 | 33.03 | 157.83 | 23.07 | 6380000000.00   |
| Guinea            | -13.65 | NA       | 387482.00   | 0.60 | 7679.00  | 42.95 | 103.87 | 23.45 | 7.52  | 1651.00 | 25.90 | 51.75  | 25.55 | 670000000.00    |
| Guinea-Bissau     | -15.60 | NA       | 42988.00    | 0.59 | 1224.00  | 27.36 | 31.59  | 50.69 | 98.66 | 1577.00 | 70.13 | 66.19  | 26.61 | 106000000.00    |
| Guyana            | -58.16 | NA       | NA          | 0.69 | 26.00    | 43.70 | 57.13  | 14.91 | 54.50 | 2387.00 | 83.95 | 3.95   | 25.80 | 317000000.00    |
| Haiti             | -72.34 | NA       | 232175.00   | 0.68 | 5163.00  | 18.84 | 56.49  | NA    | NA    | 1440.00 | 3.52  | 398.45 | 24.48 | 888000000.00    |

|             |        |              |             |      |           |        |        |       |       |         |       |         |       |                 |
|-------------|--------|--------------|-------------|------|-----------|--------|--------|-------|-------|---------|-------|---------|-------|-----------------|
| Honduras    | -87.21 | NA           | NA          | 0.65 | 1776.00   | 43.56  | 58.86  | 18.04 | 64.81 | 1976.00 | 41.04 | 82.81   | 23.39 | 2020000000.00   |
| Hong Kong   | 114.19 | NA           | NA          | NA   | NA        | 188.00 | 187.09 | 5.00  | 18.35 | NA      | NA    | 7039.71 | NA    | NA              |
| Hungary     | 19.04  | NA           | 2691000.00  | 0.44 | NA        | 90.09  | 82.27  | 5.65  | 8.23  | 589.00  | 22.85 | 108.04  | 10.06 | 12100000000.00  |
| Iceland     | -21.90 | NA           | NA          | 0.11 | NA        | 46.96  | 42.85  | 9.63  | 42.77 | 1940.00 | 0.49  | 3.40    | 1.35  | 1660000000.00   |
| India       | 77.22  | 112751266.00 | 28882064.00 | 0.73 | 364225.00 | 18.87  | 21.77  | 5.81  | 12.16 | 1083.00 | 23.77 | 450.42  | 23.95 | 207000000000.00 |
| Indonesia   | 106.84 | 1082393.00   | 29169456.00 | 1.00 | 18922.00  | 20.37  | 19.17  | 11.92 | 23.44 | 2702.00 | 50.24 | 145.73  | 25.72 | 86200000000.00  |
| Iran        | 51.42  | 2684490.00   | NA          | 0.47 | NA        | 23.79  | 22.29  | 14.13 | 3.67  | 228.00  | 6.56  | 49.83   | 16.93 | 42500000000.00  |
| Iraq        | 44.40  | 285537.00    | NA          | 0.43 | 5453.00   | 37.63  | 36.32  | 7.20  | 0.00  | 216.00  | 1.90  | 88.13   | 21.58 | 16900000000.00  |
| Ireland     | -6.25  | NA           | 218499.00   | 0.28 | NA        | 120.01 | 87.88  | 10.64 | 10.47 | 1118.00 | 10.95 | 69.87   | 9.11  | 23800000000.00  |
| Israel      | 35.22  | NA           | NA          | 0.60 | NA        | 30.27  | 28.18  | 8.69  | 3.25  | 435.00  | 7.62  | 402.61  | 19.70 | 29600000000.00  |
| Italy       | 12.48  | 360287.00    | NA          | 0.51 | NA        | 31.30  | 28.22  | 10.71 | 9.01  | 832.00  | 31.61 | 205.86  | 11.50 | 181000000000.00 |
| Ivory Coast | -4.03  | NA           | NA          | 0.63 | 10926.00  | 29.18  | 19.40  | 19.83 | 68.76 | 1348.00 | 32.71 | 76.40   | 26.30 | 3180000000.00   |
| Jamaica     | -76.79 | NA           | 3364.00     | 0.67 | 135.00    | 31.55  | 45.52  | 16.23 | 26.95 | 2051.00 | 30.95 | 266.88  | 24.47 | 1400000000.00   |
| Japan       | 139.69 | NA           | NA          | 0.64 | NA        | 16.12  | 15.15  | 10.03 | 0.86  | 1668.00 | 68.46 | 347.78  | 10.36 | 412000000000.00 |
| Jordan      | 35.95  | NA           | 4862.00     | 0.47 | 123.00    | 35.58  | 57.03  | 19.12 | 17.81 | 111.00  | 1.10  | 109.29  | 18.35 | 3750000000.00   |
| Kazakhstan  | 71.45  | NA           | NA          | 0.44 | 81.00     | 31.84  | 28.47  | 11.34 | 4.88  | 250.00  | 1.23  | 6.68    | 5.99  | 18400000000.00  |
| Kenya       | 36.82  | NA           | 138460.00   | 0.64 | 18837.00  | 13.93  | 25.47  | 10.72 | 46.22 | 630.00  | 7.75  | 87.32   | 24.50 | 6340000000.00   |
| Kiribati    | 172.98 | NA           | NA          | NA   | NA        | 9.92   | 95.41  | 40.70 | 67.00 | 630.00  | 15.00 | 143.70  | NA    | 14500000.00     |
| Kuwait      | 47.98  | NA           | NA          | 0.22 | NA        | 48.23  | 46.43  | 15.15 | 0.95  | 121.00  | 0.35  | 232.13  | 25.15 | 11300000000.00  |

|               |        |           |            |      |          |        |        |       |       |         |       |         |       |                 |
|---------------|--------|-----------|------------|------|----------|--------|--------|-------|-------|---------|-------|---------|-------|-----------------|
| Kyrgyzstan    | NA     | NA        | 103671.00  | 0.41 | 136.00   | 35.42  | 66.79  | 14.26 | 21.32 | 533.00  | 3.32  | 32.33   | 1.09  | 6570000000.00   |
| Laos          | 102.60 | 773695.00 | 1789885.00 | 0.62 | 2737.00  | 34.34  | 41.49  | 13.47 | 30.59 | 1834.00 | 81.29 | 29.71   | 23.22 | 12300000000.00  |
| Latvia        | 24.11  | NA        | 60792.00   | 0.42 | NA       | 60.47  | 61.80  | 16.16 | 20.42 | 641.00  | 53.97 | 31.21   | 5.63  | 27000000000.00  |
| Lebanon       | 35.48  | NA        | NA         | 0.57 | NA       | 23.60  | 46.37  | 18.10 | 29.92 | 661.00  | 13.42 | 594.56  | 15.61 | 47100000000.00  |
| Lesotho       | 27.48  | NA        | NA         | 0.42 | 741.00   | 42.25  | 83.13  | 20.75 | 14.34 | 788.00  | 1.61  | 73.56   | 11.97 | 2180000000.00   |
| Liberia       | -10.80 | NA        | 58200.00   | 0.56 | 2994.00  | 21.42  | 100.28 | NA    | NA    | 2391.00 | 43.39 | 49.13   | 25.25 | 2050000000.00   |
| Libya         | 13.19  | NA        | NA         | 0.24 | 124.00   | 38.01  | 70.64  | 12.13 | 0.00  | 56.00   | 0.12  | 3.62    | 21.90 | 29200000000.00  |
| Liechtenstein | 9.52   | NA        | NA         | NA   | NA       | NA     | NA     | NA    | NA    | 56.00   | 43.13 | 237.01  | NA    | 5490000000.00   |
| Lithuania     | 25.28  | NA        | 35233.00   | NA   | NA       | 81.31  | 79.29  | 12.27 | 17.22 | 656.00  | 34.80 | 45.14   | 6.24  | 41200000000.00  |
| Luxembourg    | 6.13   | NA        | NA         | NA   | NA       | 230.02 | 193.97 | 11.96 | 9.30  | 934.00  | 33.47 | 231.45  | 8.88  | 57800000000.00  |
| Macedonia     | 21.43  | NA        | NA         | 0.55 | 53.00    | 55.11  | 68.85  | 10.79 | 10.30 | 619.00  | 39.57 | 82.60   | 9.85  | 10100000000.00  |
| Madagascar    | 47.54  | NA        | 3774516.00 | 0.81 | 19366.00 | 35.42  | 39.04  | 15.41 | 38.92 | 1513.00 | 21.44 | 43.95   | 22.01 | 9980000000.00   |
| Malawi        | 33.79  | NA        | 429170.00  | 0.63 | 9539.00  | 29.16  | 36.17  | 11.41 | 77.24 | 1181.00 | 33.38 | 197.52  | 21.98 | 6570000000.00   |
| Malaysia      | 101.69 | 118674.00 | 9351106.00 | 0.81 | NA       | 71.47  | 64.45  | 8.11  | 11.09 | 2875.00 | 67.55 | 96.25   | 25.14 | 296000000000.00 |
| Maldives      | 73.51  | NA        | NA         | NA   | 8.00     | 72.81  | 77.61  | 20.93 | 98.56 | 1972.00 | 3.33  | 1454.43 | NA    | 3140000000.00   |
| Mali          | -8.00  | NA        | 161269.00  | 0.38 | 14056.00 | 22.08  | 41.05  | 16.12 | 38.32 | 282.00  | 3.86  | 15.20   | 28.30 | 13100000000.00  |
| Malta         | 14.51  | NA        | NA         | NA   | NA       | 136.11 | 125.41 | 10.36 | 7.66  | 560.00  | 1.09  | 1454.04 | NA    | 9640000000.00   |
| Mauritania    | -15.98 | NA        | NA         | 0.34 | 2176.00  | 43.18  | 66.09  | 13.78 | 50.72 | 92.00   | 0.22  | 4.29    | 27.69 | 5440000000.00   |
| Mauritius     | 57.50  | NA        | NA         | NA   | NA       | 42.07  | 55.06  | 24.16 | 38.49 | 2041.00 | 19.01 | 622.96  | 23.13 | 11500000000.00  |

|             |        |             |             |      |          |       |       |       |       |         |       |        |       |                 |
|-------------|--------|-------------|-------------|------|----------|-------|-------|-------|-------|---------|-------|--------|-------|-----------------|
| Mexico      | -99.14 | NA          | 41447.00    | 0.93 | 8061.00  | 37.88 | 39.69 | 5.91  | 7.92  | 758.00  | 33.97 | 66.44  | 20.54 | 114000000000.00 |
| Micronesia  | 158.16 | NA          | NA          | NA   | NA       | 26.62 | 72.40 | NA    | NA    | 758.00  | 91.81 | 150.78 | NA    | 318000000.00    |
| Moldova     | 28.86  | NA          | 1172368.00  | 0.45 | 38.00    | 42.54 | 70.66 | 13.97 | 63.86 | 450.00  | 12.44 | 123.65 | 9.67  | 6550000000.00   |
| Mongolia    | 106.88 | NA          | NA          | NA   | 310.00   | 59.47 | 57.12 | 15.11 | 1.94  | 241.00  | 8.08  | 1.98   | -0.50 | 11800000000.00  |
| Morocco     | -6.83  | NA          | NA          | 0.46 | 6550.00  | 36.78 | 46.68 | 12.30 | 20.96 | 346.00  | 12.62 | 80.08  | 17.23 | 10000000000.00  |
| Mozambique  | 32.59  | 366.00      | 1881736.00  | 0.52 | 20913.00 | 38.27 | 70.64 | 14.99 | 15.50 | 1032.00 | 48.25 | 37.73  | 23.69 | 14700000000.00  |
| Myanmar     | 96.13  | 3075813.00  | 15281795.00 | 0.63 | 20280.00 | 17.09 | 21.97 | 14.66 | 31.97 | 2091.00 | 44.47 | 81.72  | 22.96 | 64900000000.00  |
| Namibia     | 17.08  | NA          | NA          | 0.55 | 1007.00  | 36.68 | 47.50 | 13.46 | 36.27 | 285.00  | 8.40  | 3.08   | 20.04 | 11500000000.00  |
| Nepal       | 85.32  | 4626618.00  | 384170.00   | 0.64 | 10217.00 | 9.76  | 42.02 | 18.12 | 26.13 | 1500.00 | 25.36 | 204.43 | 12.74 | 20900000000.00  |
| Netherlands | 4.30   | NA          | 1086990.00  | 0.41 | NA       | 86.46 | 74.78 | 13.96 | 17.46 | 778.00  | 11.16 | 508.54 | 9.20  | 75300000000.00  |
| New Zealand | 174.78 | NA          | NA          | 0.52 | NA       | 25.82 | 25.51 | 11.52 | 62.81 | 1732.00 | 38.56 | 18.21  | 9.98  | 17400000000.00  |
| Nicaragua   | -86.25 | NA          | NA          | 0.64 | 1003.00  | 41.23 | 55.42 | 14.02 | 52.35 | 2280.00 | 25.88 | 51.67  | 24.59 | 12700000000.00  |
| Niger       | 2.11   | NA          | 427747.00   | 0.41 | 18727.00 | 16.62 | 32.96 | 25.12 | 38.79 | 151.00  | 0.90  | 16.96  | 27.24 | 7140000000.00   |
| Nigeria     | 7.49   | NA          | 9553912.00  | 0.55 | 96623.00 | 9.22  | 11.50 | 16.30 | 1.65  | 1150.00 | 7.68  | 209.59 | 26.78 | 48100000000.00  |
| North Korea | 125.75 | NA          | NA          | 0.37 | NA       | NA    | NA    | NA    | NA    | 1054.00 | 41.78 | 211.70 | 4.86  | NA              |
| Norway      | 10.75  | NA          | 214190.00   | 0.30 | NA       | 35.47 | 33.05 | 9.13  | 11.91 | 1414.00 | 33.16 | 14.46  | 0.75  | 38800000000.00  |
| Oman        | 58.59  | NA          | NA          | 0.36 | NA       | 41.22 | 35.59 | 15.92 | 5.46  | 125.00  | 0.01  | 14.98  | 25.45 | 70300000000.00  |
| Pakistan    | 73.06  | 25990253.00 | 2431779.00  | 0.50 | 84773.00 | 8.24  | 17.55 | 11.81 | 18.65 | 494.00  | 1.91  | 255.57 | 19.98 | 27000000000.00  |
| Palau       | 134.48 | NA          | NA          | NA   | NA       | 50.24 | 76.44 | 23.03 | 21.76 | NA      | 87.61 | 47.24  | NA    | 287000000.00    |
| Panama      | -79.52 | 2394.00     | 94148.00    | 0.79 | NA       | 41.38 | 45.90 | 5.01  | 8.66  | 2928.00 | 62.11 | 55.13  | 24.72 | 52100000000.00  |



|                                  |         |            |             |      |         |       |       |       |       |         |       |        |       |                 |
|----------------------------------|---------|------------|-------------|------|---------|-------|-------|-------|-------|---------|-------|--------|-------|-----------------|
| Papua New Guinea                 | 147.18  | NA         | NA          | 0.78 | NA      | NA    | NA    | 11.03 | 27.14 | 3142.00 | 74.10 | 18.22  | 25.05 | 1690000000.00   |
| Paraguay                         | -57.64  | NA         | 717600.00   | 0.61 | 308.00  | 41.80 | 42.78 | 8.76  | 61.82 | 1130.00 | 38.57 | 17.14  | 23.48 | 2760000000.00   |
| Peru                             | -77.03  | NA         | 1680970.00  | 0.84 | 3954.00 | 24.26 | 22.60 | 12.12 | 23.07 | 1738.00 | 57.79 | 25.13  | 19.46 | 19200000000.00  |
| Philippines                      | 120.98  | 2961485.00 | 7739879.00  | 0.79 | 7653.00 | 30.55 | 40.11 | 11.08 | 9.49  | 2348.00 | 26.96 | 351.87 | 25.33 | 29200000000.00  |
| Poland                           | 21.01   | NA         | 5551344.00  | 0.37 | NA      | 53.39 | 49.40 | 8.77  | 13.02 | 600.00  | 30.81 | 124.03 | 7.87  | 47500000000.00  |
| Portugal                         | -9.14   | NA         | NA          | 0.51 | NA      | 43.11 | 42.08 | 14.80 | 12.15 | 854.00  | 34.74 | 112.37 | 14.97 | 19900000000.00  |
| Puerto Rico                      | -66.11  | NA         | NA          | NA   | NA      | 68.41 | 41.24 | NA    | NA    | 2054.00 | 55.91 | 376.23 | 24.28 | 10300000000.00  |
| Qatar                            | 51.52   | NA         | 12266.00    | 0.19 | NA      | 47.49 | 41.63 | 9.83  | 0.03  | 74.00   | 0.00  | 227.32 | 26.92 | 16700000000.00  |
| Republic Of The Congo            | 15.28   | NA         | 1023.00     | 0.65 | 2072.00 | 79.76 | 58.82 | 17.85 | 0.25  | 1646.00 | 65.40 | 15.40  | 24.52 | 8550000000.00   |
| Romania                          | 26.10   | 22380.00   | 3772338.00  | 0.42 | NA      | 41.44 | 43.57 | 9.25  | 10.28 | 637.00  | 29.82 | 85.13  | 8.81  | 17800000000.00  |
| Russia                           | 37.62   | NA         | 15667236.00 | 0.45 | NA      | 26.04 | 20.69 | 12.16 | 5.75  | 460.00  | 49.76 | 8.82   | -6.32 | 133000000000.00 |
| Rwanda                           | 30.06   | NA         | 6729.00     | 0.73 | 6655.00 | 18.24 | 32.77 | 19.38 | 56.20 | 1212.00 | 19.46 | 494.87 | 19.01 | 8100000000.00   |
| Saint Kitts And Nevis            | -62.73  | NA         | NA          | NA   | NA      | 56.99 | 56.53 | 25.38 | 13.26 | 1427.00 | 42.31 | 212.87 | NA    | 922000000.00    |
| Saint Lucia                      | -60.99  | NA         | 969.00      | NA   | 3.00    | NA    | NA    | 22.62 | 36.25 | 2301.00 | 33.28 | 293.19 | NA    | 144000000.00    |
| Saint Vincent And The Grenadines | -61.22  | NA         | NA          | NA   | NA      | 34.52 | 49.06 | 27.98 | 85.95 | 1583.00 | 69.23 | 281.79 | 26.82 | 751000000.00    |
| Samoa                            | -171.77 | NA         | 281.00      | NA   | NA      | 29.34 | 49.85 | 27.77 | 56.00 | NA      | 60.42 | 69.41  | NA    | 761000000.00    |
| Sao Tome And Principe            | 6.73    | NA         | NA          | NA   | 44.00   | NA    | NA    | 29.73 | 85.40 | 3200.00 | 55.83 | 212.84 | NA    | 337000000.00    |

|                 |        |           |             |      |          |        |        |       |       |         |       |         |       |                 |
|-----------------|--------|-----------|-------------|------|----------|--------|--------|-------|-------|---------|-------|---------|-------|-----------------|
| Saudi Arabia    | 46.71  | NA        | NA          | 0.28 | NA       | 33.54  | 28.14  | 14.90 | 1.74  | 59.00   | 0.45  | 15.32   | 24.65 | 64600000000.00  |
| Senegal         | -17.44 | NA        | NA          | 0.51 | 8389.00  | 27.04  | 42.75  | 23.98 | 38.48 | 686.00  | 42.97 | 82.33   | 27.87 | 13800000000.00  |
| Serbia          | 20.46  | NA        | 527310.00   | NA   | 30.00    | 52.45  | 61.26  | 5.78  | 18.61 | 686.00  | 31.10 | 80.29   | 10.18 | 36500000000.00  |
| Seychelles      | 55.45  | NA        | NA          | NA   | NA       | 88.02  | 104.01 | 18.37 | 89.46 | 2330.00 | 88.41 | 208.35  | NA    | 1440000000.00   |
| Sierra Leone    | -13.23 | NA        | 399103.00   | 0.65 | 5657.00  | 24.91  | 54.50  | 32.57 | 73.35 | 2526.00 | 42.17 | 104.70  | 26.04 | 4470000000.00   |
| Singapore       | 103.85 | NA        | NA          | NA   | NA       | 173.35 | 149.08 | 4.04  | 2.70  | 2497.00 | 23.06 | 7915.73 | NA    | 29300000000.00  |
| Slovakia        | 17.11  | 500.00    | 170550.00   | 0.59 | NA       | 96.30  | 92.88  | 5.64  | 3.63  | 824.00  | 40.35 | 113.13  | 7.27  | 86600000000.00  |
| Slovenia        | 14.51  | NA        | 16280.00    | 0.56 | NA       | 82.21  | 72.55  | 8.18  | 4.39  | 1162.00 | 61.97 | 102.62  | 8.04  | 42700000000.00  |
| Solomon Islands | 159.95 | NA        | NA          | 0.60 | NA       | 45.07  | 53.32  | 24.57 | 23.63 | 3028.00 | 78.06 | 21.84   | 25.68 | 1160000000.00   |
| Somalia         | 45.34  | NA        | NA          | 0.53 | 11773.00 | 13.46  | 64.21  | NA    | NA    | 282.00  | 10.14 | 23.50   | 26.77 | 5950000000.00   |
| South Africa    | 18.42  | NA        | NA          | 0.71 | 4604.00  | 29.77  | 28.41  | 7.90  | 11.47 | 495.00  | 7.62  | 46.75   | 17.60 | 31300000000.00  |
| South Korea     | 126.98 | NA        | 12735187.00 | 0.42 | NA       | 43.09  | 37.69  | 5.93  | 1.31  | 1274.00 | 63.44 | 527.97  | 10.66 | 138000000000.00 |
| South Sudan     | 31.58  | NA        | NA          | NA   | 11242.00 | 54.95  | 61.75  | NA    | NA    | 900.00  | NA    | NA      | 26.93 | 9020000000.00   |
| Spain           | -3.70  | 704.00    | 164450.00   | 0.49 | NA       | 34.09  | 31.43  | 11.28 | 16.24 | 636.00  | 36.82 | 93.10   | 13.03 | 120000000000.00 |
| Sri Lanka       | 79.85  | 414630.00 | 11850.00    | 0.66 | NA       | 21.93  | 29.14  | 13.38 | 26.04 | 1712.00 | 33.01 | 341.96  | 26.76 | 82300000000.00  |
| Sudan           | 32.53  | NA        | NA          | 0.54 | 20738.00 | 9.69   | 11.82  | 17.98 | 6.68  | 250.00  | 8.08  | 23.26   | 26.82 | 84100000000.00  |
| Suriname        | -55.17 | NA        | NA          | 0.62 | 52.00    | 68.93  | 60.64  | 16.74 | 12.51 | 2331.00 | 98.28 | 3.61    | 25.77 | 4880000000.00   |
| Swaziland       | 31.13  | 95.00     | NA          | NA   | 263.00   | 49.52  | 52.68  | 20.54 | 21.13 | 788.00  | 34.07 | 79.49   | 20.41 | 4060000000.00   |
| Sweden          | 18.06  | NA        | NA          | 0.30 | NA       | 45.32  | 41.12  | 10.68 | 6.34  | 624.00  | 68.92 | 24.72   | 1.55  | 49300000000.00  |

|                      |         |           |             |      |          |        |       |       |       |         |       |        |       |                 |
|----------------------|---------|-----------|-------------|------|----------|--------|-------|-------|-------|---------|-------|--------|-------|-----------------|
| Switzerland          | 7.45    | NA        | 3942.00     | 0.50 | NA       | 64.98  | 53.93 | 6.00  | 3.92  | 1537.00 | 31.73 | 214.24 | 4.75  | 66500000000.00  |
| Syria                | 36.31   | 6375.00   | 44028.00    | 0.47 | 1362.00  | NA     | 37.83 | NA    | 21.01 | 252.00  | 2.67  | 99.49  | 17.65 | 4040000000.00   |
| Tajikistan           | 68.78   | NA        | NA          | 0.46 | 1058.00  | 15.71  | 40.89 | NA    | NA    | 691.00  | 2.97  | 64.28  | 3.03  | 785000000.00    |
| Tanzania             | 35.74   | NA        | 1163058.00  | 0.67 | 30915.00 | 19.59  | 22.74 | 10.76 | 56.72 | 1071.00 | 52.00 | 64.70  | 22.31 | 4490000000.00   |
| Thailand             | 100.53  | 908055.00 | 32620489.00 | 0.67 | 543.00   | 68.11  | 53.55 | 7.03  | 13.89 | 1622.00 | 32.10 | 135.13 | 26.25 | 39500000000.00  |
| Togo                 | 1.21    | NA        | 13200.00    | 0.69 | 3679.00  | 40.47  | 59.51 | 17.68 | 22.42 | 1168.00 | 3.46  | 143.37 | 26.80 | 400000000.00    |
| Tonga                | -175.20 | NA        | 2705.00     | NA   | NA       | 21.31  | 68.12 | 27.18 | 85.68 | NA      | 12.50 | 150.03 | NA    | 43400000.00     |
| Trinidad And Tobago  | -61.52  | NA        | NA          | 0.69 | 9.00     | NA     | NA    | 11.41 | 4.00  | 2200.00 | 45.71 | 266.89 | 25.86 | 2780000000.00   |
| Tunisia              | 10.17   | NA        | NA          | 0.41 | 151.00   | 43.81  | 56.10 | 11.15 | 10.32 | 207.00  | 6.70  | 74.23  | 19.36 | 4300000000.00   |
| Turkey               | 32.85   | 120627.00 | 399077.00   | 0.57 | NA       | 24.84  | 29.33 | 5.67  | 11.03 | 593.00  | 15.22 | 104.91 | 10.93 | 71800000000.00  |
| Turkmenistan         | 58.38   | NA        | NA          | 0.45 | 23.00    | NA     | 44.39 | NA    | NA    | 161.00  | 8.78  | 12.25  | 15.22 | 3730000000.00   |
| Uganda               | 32.58   | NA        | 674378.00   | 0.66 | 23549.00 | 18.51  | 25.91 | 13.33 | 65.65 | 1180.00 | 10.36 | 213.76 | 22.60 | 2640000000.00   |
| Ukraine              | 30.52   | NA        | 10666785.00 | 0.42 | 107.00   | 47.95  | 54.27 | 8.40  | 40.81 | 565.00  | 16.67 | 77.39  | 8.21  | 9060000000.00   |
| United Arab Emirates | 54.36   | NA        | NA          | 0.39 | NA       | 100.38 | 72.43 | 6.67  | 1.49  | 78.00   | 3.86  | 112.44 | 26.83 | 37000000000.00  |
| United Kingdom       | -0.13   | 3719.00   | 2451127.00  | 0.32 | NA       | 30.53  | 31.93 | 10.15 | 6.87  | 1220.00 | 13.00 | 272.90 | 8.31  | 28500000000.00  |
| United States        | -77.04  | 57017.00  | 3195983.00  | 0.68 | NA       | 11.89  | 14.69 | 6.10  | 10.26 | 715.00  | 33.90 | 35.61  | 6.75  | 179000000000.00 |
| Uruguay              | -56.17  | NA        | NA          | 0.49 | NA       | 21.56  | 18.43 | 13.30 | 63.49 | 1300.00 | 10.54 | 19.75  | 17.57 | 5340000000.00   |
| Uzbekistan           | 69.22   | NA        | NA          | 0.44 | 1377.00  | 28.52  | 29.54 | NA    | NA    | 206.00  | 7.57  | 76.13  | 12.52 | 6670000000.00   |
| Vanuatu              | 168.32  | NA        | NA          | 0.39 | 105.00   | 48.56  | 49.39 | NA    | NA    | 206.00  | 36.10 | 22.66  | 23.84 | 81500000.00     |

|           |        |            |             |      |          |        |       |       |       |         |       |        |       |                |
|-----------|--------|------------|-------------|------|----------|--------|-------|-------|-------|---------|-------|--------|-------|----------------|
| Venezuela | -66.88 | 225790.00  | 142724.00   | 0.85 | NA       | 16.69  | 31.40 | 18.41 | 0.04  | 2044.00 | 52.93 | 36.25  | 25.32 | 37100000000.00 |
| Vietnam   | 105.84 | 2778333.00 | 77470775.00 | 0.68 | 4724.00  | 101.56 | 98.75 | 8.74  | 12.87 | 1821.00 | 47.64 | 308.13 | 24.07 | 19400000000.00 |
| Yemen     | 44.21  | NA         | NA          | NA   | 13178.00 | 3.58   | 29.95 | 46.93 | 81.00 | 167.00  | 1.04  | 53.51  | 23.16 | 36000000000.00 |
| Zambia    | 28.28  | NA         | NA          | 0.54 | 8856.00  | 35.24  | 36.39 | 5.64  | 8.89  | 1020.00 | 65.42 | 22.99  | 21.58 | 21200000000.00 |
| Zimbabwe  | 31.05  | NA         | NA          | 0.59 | 5602.00  | 24.12  | 37.40 | 20.13 | 53.39 | 657.00  | 36.35 | 42.73  | 21.03 | 13900000000.00 |

| Country             | GDP per capita | National income per capita | Health expenditure per percent GDP | Health expenditure per capita | Physicians per 1000 people | Nurses midwives per 1000 people | Prevalence undernourished | Death rate per 1000 people | Birth rate per 1000 people | Surface area | Human population density | GNI Atlas | GNI per capita Atlas | Cattle population |
|---------------------|----------------|----------------------------|------------------------------------|-------------------------------|----------------------------|---------------------------------|---------------------------|----------------------------|----------------------------|--------------|--------------------------|-----------|----------------------|-------------------|
| Afghanistan         | 590.3          | 1824                       | 10.3                               | 60.1                          | 0.3                        | 0.4                             | 30                        | 7                          | 33                         | 652.9        | 54                       | 20.2      | 570                  | 3706186           |
| Albania             | 3954           | 11886                      | 6.8                                | 265.9                         | 1.3                        | 3.9                             | 6                         | 7                          | 12                         | 28.8         | 105                      | 12.4      | 4320                 | 498018            |
| Algeria             | 4210           | 13802                      | 7.1                                | 291.6                         | 1.2                        | 1.9                             | 5                         | 5                          | 23                         | 2381.7       | 17                       | 163.5     | 3960                 | 1345593           |
| American Samoa      | NA             | NA                         | NA                                 | NA                            | NA                         | NA                              | NA                        | NA                         | NA                         | 0.2          | 278                      | NA        | NA                   | 300               |
| Andorra             | 46106          | 47574                      | 12                                 | 4315.7                        | 3.7                        | 4.4                             | NA                        | 4                          | 9                          | 0.5          | 164                      | NA        | NA                   | 1717              |
| Angola              | 4116           | 5790                       | 2.9                                | 108.6                         | 0.1                        | 1.4                             | 24                        | 9                          | 42                         | 1246.7       | 24                       | 99.1      | 3330                 | 4790599           |
| Antigua And Barbuda | 14129          | 20764                      | 4.8                                | 657.2                         | NA                         | NA                              | NA                        | 6                          | 16                         | 0.4          | 232                      | 1.4       | 1417                 | NA                |
| Argentina           | 12622          | 18461                      | 6.8                                | 997.9                         | 3.9                        | 4.2                             | 4                         | 8                          | 17                         | 2780.4       | 16                       | 577.1     | 1304                 | 4249899           |
| Armenia             | 3499           | 9144                       | 10.1                               | 366                           | 2.8                        | 5.4                             | 4                         | 10                         | 13                         | 29.7         | 103                      | 11.7      | 4000                 | 688553            |
| Australia           | 55906          | 43560                      | 9.4                                | 4934                          | 3.5                        | 12.6                            | 3                         | 7                          | 13                         | 7741.2       | 3                        | 1263.5    | 5136                 | 2769196           |
| Austria             | 43768          | 45415                      | 10.3                               | 4536.1                        | 5.2                        | 8.3                             | 3                         | 9                          | 10                         | 83.9         | 107                      | 400.3     | 4544                 | 2023648           |
| Azerbaijan          | 5439           | 15600                      | 6.7                                | 368.3                         | 3.4                        | 6.9                             | 3                         | 6                          | 16                         | 86.6         | 119                      | 40.2      | 4080                 | 2445178           |
| Bahamas             | 22898          | 26681                      | 7.4                                | 1685.5                        | 2.3                        | 4                               | NA                        | 6                          | 14                         | 13.9         | 39                       | 11.5      | 2917                 | NA                |
| Bahrain             | 23400          | 41580                      | 5.2                                | 1190                          | 0.9                        | 2.5                             | NA                        | 2                          | 15                         | 0.8          | 1936                     | 30.2      | 2024                 | NA                |
| Bangladesh          | 1211           | 3677                       | 2.6                                | 31.8                          | 0.5                        | 0.3                             | 15                        | 5                          | 19                         | 147.6        | 1265                     | 242.8     | 1470                 | 2566457           |
| Barbados            | 15662          | 15843                      | 7.5                                | 1160.2                        | 1.8                        | 4.9                             | 4                         | 11                         | 12                         | 0.4          | 664                      | 4.4       | 1554                 | NA                |
| Belarus             | 5751           | 16323                      | 6.1                                | 351.8                         | 4.1                        | 11.4                            | 3                         | 13                         | 12                         | 207.6        | 47                       | 50.2      | 5280                 | 4190500           |
| Belgium             | 40181          | 42156                      | 10.5                               | 4228.3                        | 3                          | 11.1                            | 3                         | 10                         | 11                         | 30.5         | 376                      | 475.2     | 4179                 | 1878963           |
| Belize              | 4907           | 7166                       | 6.2                                | 301.2                         | 0.8                        | 2                               | 7                         | 5                          | 23                         | 23           | 16                       | 1.6       | 4390                 | 104149            |
| Benin               | 779.1          | 2061                       | 4                                  | 31.3                          | 0.2                        | 0.6                             | 10                        | 9                          | 37                         | 114.8        | 99                       | 9         | 800                  | 2166000           |

|                          |       |       |      |        |     |     |    |    |    |        |     |         |      |           |
|--------------------------|-------|-------|------|--------|-----|-----|----|----|----|--------|-----|---------|------|-----------|
| Bhutan                   | 2533  | 8065  | 3.5  | 91.1   | 0.4 | 1.5 | NA | 6  | 18 | 38.4   | 21  | 2.2     | 2720 | 300780    |
| Bolivia                  | 3095  | 6714  | 6.4  | 197.3  | 0.5 | 1   | 20 | 7  | 23 | 1098.6 | 10  | 34.6    | 3130 | 8315504   |
| Bosnia And Herzegovina   | 4198  | 11716 | 9.4  | 431.2  | 1.9 | 5.9 | 3  | 11 | 9  | 51.2   | 68  | 17.3    | 4940 | NA        |
| Botswana                 | 6362  | 15534 | 6    | 389.4  | 0.4 | 2.7 | 29 | 7  | 24 | 581.7  | 4   | 15.6    | 6820 | 1844866   |
| Brazil                   | 8516  | 13755 | 8.9  | 780.4  | 1.9 | 7.4 | 3  | 6  | 14 | 8515.8 | 25  | 1796.5  | 8580 | 212343932 |
| Brunei                   | 36607 | 76427 | 2.6  | 812.2  | 1.7 | 6.5 | 3  | 4  | 16 | 5.8    | 81  | 12.7    | 2960 | NA        |
| Bulgaria                 | 6847  | 18740 | 8.2  | 572    | 4   | 5.3 | 3  | 15 | 9  | 111    | 65  | 54.9    | 7760 | 572581    |
| Burkina Faso             | 613   | 1650  | 5.4  | 33.4   | 0   | 0.6 | 21 | 9  | 39 | 274.2  | 70  | 11.7    | 610  | 9090997   |
| Burundi                  | 276   | 702   | 8.2  | 24.3   | NA  | NA  | NA | 11 | 42 | 27.8   | 423 | 3.1     | 290  | 364732    |
| Cambodia                 | 1159  | 3413  | 6    | 69.6   | 0.1 | 1   | 19 | 6  | 23 | 181    | 91  | 19.7    | 1230 | 3339623   |
| Cameroon                 | 1251  | 3315  | 5.1  | 63.6   | 0.1 | 0.5 | 7  | 10 | 36 | 475.4  | 51  | 32.7    | 1360 | 1253931   |
| Canada                   | 43127 | 43433 | 10.4 | 4507.6 | 2.5 | 9.8 | 3  | 8  | 11 | 9984.7 | 4   | 1573.5  | 4287 | 127710806 |
| Cape Verde               | 3131  | 5983  | 4.8  | 145.8  | 0.8 | 1.3 | 12 | 6  | 21 | 4      | 136 | 1.6     | 2990 | 22306     |
| Central African Republic | 306.8 | 663   | 4.8  | 16.6   | 0   | 0.3 | 62 | 14 | 36 | 623    | 7   | 1.8     | 390  | 2501269   |
| Chad                     | 775.7 | 1750  | 4.6  | 35.6   | 0   | 0.3 | 40 | 13 | 43 | 1284   | 12  | 9.4     | 630  | 6879722   |
| Chile                    | 13372 | 21910 | 8.1  | 1102   | 1   | 0.1 | 3  | 6  | 13 | 756.1  | 24  | 245.7   | 1361 | 37185320  |
| China                    | 7745  | 15270 | 5.3  | 425.6  | 1.8 | 2.3 | 9  | 7  | 12 | 9562.9 | 148 | 12042.9 | 8690 | 135686083 |
| Colombia                 | 6054  | 12938 | 6.2  | 374.2  | 1.8 | 1.1 | 7  | 6  | 15 | 1141.7 | 44  | 286.1   | 5830 | 22527783  |
| Comoros                  | 791.1 | 1399  | 8    | 58.5   | NA  | NA  | NA | 7  | 33 | 1.9    | 437 | 0.6     | 760  | 64000     |
| Costa Rica               | 10630 | 14636 | 8.1  | 929.1  | 1.2 | 0.8 | 4  | 5  | 14 | 51.1   | 96  | 54.1    | 1104 | 12788170  |
| Croatia                  | 11493 | 22162 | 7.4  | 852.1  | 3.1 | 6.5 | 3  | 12 | 9  | 56.6   | 74  | 51.3    | 1243 | 3980370   |
| Cuba                     | 6773  | 7524  | NA   | NA     | 7.5 | 8   | 3  | 8  | 11 | 109.9  | 110 | NA      | NA   | 2980869   |
| Cyprus                   | 16583 | 31568 | 6.8  | 1563.3 | 2.5 | 4.1 | 5  | 7  | 11 | 9.3    | 128 | 20.4    | 2372 | 534130    |
| Czech Republic           | 17263 | 30588 | 7.3  | 1284   | 3.7 | 8.4 | 3  | 10 | 11 | 78.9   | 137 | 192.3   | 1816 | 13280080  |

|                                  |       |       |      |        |     |      |    |    |    |        |     |        |      |           |
|----------------------------------|-------|-------|------|--------|-----|------|----|----|----|--------|-----|--------|------|-----------|
| Democratic Republic Of The Congo | 456.1 | 796   | 4.3  | 19.8   | 0.1 | 1    | NA | 10 | 42 | 2344.9 | 36  | 36.5   | 450  | 669342    |
| Denmark                          | 52037 | 47918 | 10.3 | 5497.4 | 3.7 | 17   | 3  | 9  | 11 | 42.9   | 137 | 318.6  | 5522 | 15710500  |
| Djibouti                         | 1790  | 3392  | 4.4  | 81.7   | 0.2 | 0.6  | 20 | 8  | 23 | 23.2   | 41  | 1.8    | 1880 | 297001    |
| Dominica                         | 7399  | 8344  | 5.4  | 383.7  | NA  | NA   | 5  | NA | NA | 0.8    | 99  | 0.5    | 6990 | NA        |
| Dominican Republic               | 6374  | 13921 | 6.2  | 396.7  | 1.5 | 1.3  | 10 | 6  | 20 | 48.7   | 223 | 71.4   | 6630 | 2453276   |
| East Timor                       | 1192  | 6846  | 3.1  | 71.7   | 0.1 | 1.3  | 27 | 6  | 35 | 14.9   | 87  | 2.3    | 1790 | NA        |
| Ecuador                          | 6256  | 10347 | 8.5  | 530.1  | 1.7 | 2.1  | 8  | 5  | 20 | 256.4  | 67  | 97.8   | 5890 | 4481052   |
| Egypt                            | 3617  | 10355 | 4.2  | 156.6  | 0.8 | 1.4  | 5  | 6  | 26 | 1001.5 | 98  | 293.4  | 3010 | 4779743   |
| El Salvador                      | 4219  | 6868  | 6.9  | 283.2  | 1.6 | 0.4  | 10 | 7  | 19 | 21     | 308 | 22.7   | 3560 | 1141323   |
| Equatorial Guinea                | 11120 | 19513 | 2.7  | 280    | NA  | NA   | NA | 10 | 34 | 28.1   | 45  | 8.9    | 7060 | 320       |
| Eritrea                          | 533.1 | 1750  | 3.3  | 30.9   | NA  | NA   | NA | 7  | 32 | 117.6  | NA  | NA     | NA   | 1927137   |
| Estonia                          | 17282 | 28993 | 6.5  | 1112   | 3.4 | 6.4  | 3  | 12 | 11 | 45.2   | 31  | 23.9   | 1819 | 2807310   |
| Ethiopia                         | 619.1 | 1719  | 4    | 24.3   | 0   | 0.2  | 21 | 7  | 32 | 1104.3 | 105 | 77.3   | 740  | 45543318  |
| Fiji                             | 4916  | 8324  | 3.6  | 174.9  | 0.8 | 2.9  | 4  | 7  | 19 | 18.3   | 50  | 4.5    | 4970 | 134412    |
| Finland                          | 41795 | 41002 | 9.4  | 4005.5 | 3.2 | 15   | 3  | 10 | 10 | 338.4  | 18  | 245.7  | 4458 | 9128180   |
| France                           | 37581 | 39254 | 11.1 | 4026.1 | 3.2 | 10.6 | 3  | 9  | 12 | 549.1  | 123 | 2548.3 | 3797 | 168826106 |
| Gabon                            | 8313  | 16431 | 2.7  | 197.9  | 0.4 | 2.9  | 9  | 8  | 30 | 267.7  | 8   | 13.4   | 6610 | 18321     |
| Gambia                           | 427.4 | 1516  | 6.7  | 31.9   | 0.1 | 1.6  | 10 | 8  | 39 | 11.3   | 208 | 0.9    | 450  | 323167    |
| Georgia                          | 3491  | 9186  | 7.9  | 280.9  | 4.8 | 4    | 7  | 13 | 13 | 69.7   | 65  | 14.1   | 3790 | 1157781   |
| Germany                          | 41641 | 46136 | 11.2 | 4591.8 | 4.2 | 13.8 | 3  | 11 | 9  | 357.4  | 237 | 3596.6 | 4349 | 126511400 |
| Ghana                            | 1381  | 4096  | 5.9  | 79.6   | 0.1 | 0.9  | 6  | 8  | 31 | 238.5  | 127 | 42.9   | 1490 | 1858451   |
| Greece                           | 17800 | 24648 | 8.4  | 1504.8 | 6.3 | 3.4  | 3  | 11 | 9  | 132    | 83  | 194.7  | 1809 | 6149940   |
| Grenada                          | 9159  | 12864 | 5    | 460.3  | NA  | NA   | NA | 7  | 19 | 0.3    | 317 | 1      | 9650 | NA        |
| Guatemala                        | 3903  | 7278  | 5.7  | 224.4  | 0.9 | 0.9  | 16 | 5  | 25 | 108.9  | 158 | 68.6   | 4060 | 1627522   |
| Guinea                           | 531.3 | 2067  | 4.5  | 25.1   | 0.1 | 0.4  | 20 | 9  | 36 | 245.9  | 52  | 10.2   | 800  | 5234783   |
| Guinea-Bissau                    | 573.1 | 1552  | 6.9  | 39.5   | 0   | 0.6  | 26 | 11 | 37 | 36.1   | 66  | 1.2    | 660  | 1506911   |

|             |       |       |      |        |     |      |    |    |    |        |      |        |      |         |
|-------------|-------|-------|------|--------|-----|------|----|----|----|--------|------|--------|------|---------|
| Guyana      | 4127  | 7447  | 4.5  | 184.5  | 0.2 | 0.5  | 8  | 8  | 21 | 215    | 4    | 3.5    | 4460 | NA      |
| Haiti       | 828.8 | 1665  | 6.9  | 53.6   | NA  | NA   | 46 | 9  | 24 | 27.8   | 398  | 8.4    | 760  | 1103769 |
| Honduras    | 2496  | 4215  | 7.6  | 176.6  | NA  | NA   | 15 | 5  | 22 | 112.5  | 83   | 20.8   | 2250 | 2077460 |
| Hong Kong   | NA    | 58420 | NA   | NA     | NA  | NA   | 3  | 6  | 8  | 1.1    | 7040 | 342.3  | 4631 | NA      |
|             |       |       |      |        |     |      |    |    |    |        |      |        | 0    |         |
| Hungary     | 12278 | 25393 | 7.2  | 893.7  | 3.1 | 6.6  | 3  | 13 | 10 | 93     | 108  | 125.9  | 1287 | 774000  |
|             |       |       |      |        |     |      |    |    |    |        |      |        | 0    |         |
| Iceland     | 50390 | 45810 | 8.6  | 4375.4 | 3.8 | 15.2 | 3  | 7  | 12 | 103    | 3    | 20.8   | 6083 | 73781   |
|             |       |       |      |        |     |      |    |    |    |        |      |        | 0    |         |
| India       | 1579  | 6353  | 3.9  | 63.3   | 0.8 | 2.1  | 15 | 7  | 19 | 3287.3 | 450  | 2430.8 | 1820 | 2129260 |
|             |       |       |      |        |     |      |    |    |    |        |      |        | 47   |         |
| Indonesia   | 3347  | 10846 | 3.3  | 111.8  | 0.2 | 1.3  | 8  | 7  | 19 | 1910.9 | 146  | 934.4  | 3540 | 1274071 |
|             |       |       |      |        |     |      |    |    |    |        |      |        | 6    |         |
| Iran        | 5372  | 19130 | 7.6  | 366    | 1.5 | 1.6  | 5  | 5  | 17 | 1745.2 | 50   | 438.4  | 5400 | 6075770 |
| Iraq        | 4640  | 17789 | 3.4  | 154.5  | 0.9 | 1.8  | 28 | 5  | 33 | 435.1  | 88   | 182.6  | 4770 | 2552113 |
| Ireland     | 50768 | 53754 | 7.8  | 4757.1 | 3   | 12.4 | 3  | 6  | 14 | 70.3   | 70   | 266.2  | 5529 | 6848055 |
|             |       |       |      |        |     |      |    |    |    |        |      |        | 0    |         |
| Israel      | 36706 | 32711 | 7.4  | 2756.1 | 3.6 | 5.1  | 3  | 5  | 21 | 22.1   | 403  | 324.7  | 3727 | 177194  |
|             |       |       |      |        |     |      |    |    |    |        |      |        | 0    |         |
| Italy       | 30269 | 35299 | 9    | 2700.4 | 4   | 5.7  | 3  | 10 | 8  | 301.3  | 206  | 1878.3 | 3102 | 5587719 |
|             |       |       |      |        |     |      |    |    |    |        |      |        | 0    |         |
| Ivory Coast | 1399  | 3481  | 5.4  | 75.5   | 0.1 | 0.5  | 21 | 12 | 37 | 322.5  | 76   | 37.5   | 1540 | 1135196 |
| Jamaica     | 5015  | 7846  | 5.9  | 294.3  | 0.5 | 1.7  | 9  | 7  | 17 | 11     | 267  | 13.7   | 4750 | 113338  |
| Japan       | 32550 | 38986 | 10.9 | 3732.6 | 2.4 | 11.2 | 3  | 11 | 8  | 378    | 348  | 4888.1 | 3855 | 4065420 |
|             |       |       |      |        |     |      |    |    |    |        |      |        | 0    |         |
| Jordan      | 4940  | 8288  | 6.3  | 257.4  | 3.4 | 3.1  | 14 | 4  | 26 | 89.3   | 109  | 38.7   | 3980 | 88215   |
| Kazakhstan  | 10440 | 22626 | 3.9  | 379.1  | 3.3 | 8.5  | 3  | 7  | 23 | 2724.9 | 7    | 142.3  | 7890 | 5690000 |
| Kenya       | 1377  | 2961  | 5.2  | 70.1   | 0.2 | 1.6  | 24 | 6  | 31 | 580.4  | 87   | 71.4   | 1440 | 1746577 |
|             |       |       |      |        |     |      |    |    |    |        |      |        | 4    |         |
| Kiribati    | 1292  | 3042  | 7.6  | 108.4  | 0.2 | 4.6  | 3  | 7  | 28 | 0.8    | 144  | 0.3    | 2780 | NA      |
| Kuwait      | 29034 | 70524 | 4    | 1168.8 | 2.6 | 7    | 3  | 3  | 16 | 17.8   | 232  | 130    | 3143 | 27310   |
|             |       |       |      |        |     |      |    |    |    |        |      |        | 0    |         |
| Kyrgyzstan  | 1106  | 3255  | 8.2  | 92.1   | 1.9 | 6.4  | 7  | 6  | 26 | 199.9  | 32   | 7      | 1130 | 1131496 |
| Laos        | 1812  | 6070  | 2.8  | 53     | 0.5 | 1    | 17 | 7  | 24 | 236.8  | 30   | 15.6   | 2270 | 1583334 |
| Latvia      | 13723 | 25002 | 5.8  | 783.8  | 3.2 | 4.9  | 3  | 15 | 11 | 64.5   | 31   | 28.6   | 1474 | 380226  |
|             |       |       |      |        |     |      |    |    |    |        |      |        | 0    |         |
| Lebanon     | 8050  | 13378 | 7.4  | 645.2  | 2.4 | 2.6  | 11 | 5  | 15 | 10.5   | 595  | 50.5   | 8310 | 56626   |
| Lesotho     | 1022  | 3255  | 8.4  | 90.9   | NA  | NA   | 13 | 13 | 28 | 30.4   | 74   | 2.8    | 1280 | 540133  |
| Liberia     | 455.9 | 667   | 15.2 | 69.3   | 0   | 0.5  | 39 | 8  | 34 | 111.4  | 49   | 1.8    | 380  | 10660   |



|               |        |       |      |        |     |      |    |    |    |        |      |        |       |          |
|---------------|--------|-------|------|--------|-----|------|----|----|----|--------|------|--------|-------|----------|
| Libya         | 4644   | 11100 | NA   | NA     | 2.1 | 6.9  | NA | 5  | 20 | 1759.5 | 4    | 41.7   | 6540  | 154270   |
| Liechtenstein | 149165 | 97336 | NA   | NA     | NA  | NA   | NA | 7  | 10 | 0.2    | 237  | NA     | NA    | 6078     |
| Lithuania     | 14331  | 28314 | 6.5  | 923.3  | 4.4 | 8.1  | 3  | 14 | 11 | 65.3   | 45   | 43     | 15200 | 780051   |
| Luxembourg    | 101911 | 65016 | 6    | 6236   | 2.9 | 12.3 | 3  | 7  | 10 | 2.6    | 231  | 42.1   | 70260 | 188473   |
| Macedonia     | 4854   | 12505 | 6.1  | 295.4  | 2.9 | 3.8  | 4  | 10 | 11 | 25.7   | 83   | 10.2   | 4880  | 232526   |
| Madagascar    | 411.8  | 1358  | 5.2  | 21     | 0.1 | 0.2  | 43 | 6  | 33 | 587.3  | 44   | 10.3   | 400   | 9500138  |
| Malawi        | 381.4  | 1064  | 9.3  | 34.2   | 0   | 0.3  | 26 | 7  | 37 | 118.5  | 198  | 6      | 320   | 884132   |
| Malaysia      | 9759   | 26107 | 4    | 385.6  | 1.5 | 4.1  | 3  | 5  | 17 | 330.8  | 96   | 305.1  | 9650  | 742558   |
| Maldives      | 8641   | 13567 | 11.5 | 943.9  | 3.6 | 8.2  | 11 | 3  | 18 | 0.3    | 1454 | 4.2    | 9570  | NA       |
| Mali          | 744.3  | 1953  | 5.8  | 42.3   | 0.1 | 0.4  | 6  | 10 | 43 | 1240.2 | 15   | 14.3   | 770   | 7431226  |
| Malta         | 23030  | 34396 | 9.6  | 2304.2 | 3.9 | 9.1  | 3  | 8  | 10 | 0.3    | 1454 | 11.1   | 23810 | 15688    |
| Mauritania    | 1338   | 3592  | 4.6  | 53.6   | 0.1 | 0.7  | 11 | 8  | 34 | 1030.7 | 4    | 4.9    | 1100  | 795500   |
| Mauritius     | 9042   | 20189 | 5.5  | 506.1  | 2   | 3.3  | 6  | 8  | 10 | 2      | 623  | 12.8   | 10140 | 5707     |
| Mexico        | 8975   | 16944 | 5.9  | 534.8  | 2.2 | 2.6  | 4  | 5  | 18 | 1964.4 | 66   | 1112.5 | 8610  | 23237877 |
| Micronesia    | 3044   | 3843  | 13.1 | 394.9  | 0.2 | 3.3  | NA | 6  | 24 | 0.7    | 151  | 0.4    | 3590  | NA       |
| Moldova       | 1610   | 5554  | 10.2 | 186.4  | 3.2 | 4.5  | NA | 11 | 10 | 33.9   | 124  | 7.8    | 2180  | 191200   |
| Mongolia      | 3974   | 10103 | 3.9  | 152.5  | 3.3 | 4.1  | 19 | 6  | 24 | 1564.1 | 2    | 10.1   | 3290  | 2583027  |
| Morocco       | 2909   | 7340  | 5.5  | 159.8  | 0.6 | 0.9  | 4  | 5  | 20 | 446.6  | 80   | 103.9  | 2860  | 2651200  |
| Mozambique    | 525    | 1093  | 5.4  | 28.3   | 0.1 | 0.4  | 31 | 10 | 39 | 799.4  | 38   | 12.3   | 420   | 590363   |
| Myanmar       | 1204   | 5567  | 4.9  | 59.1   | 0.6 | 0.9  | 11 | 8  | 18 | 676.6  | 82   | 63.5   | 1190  | 13981114 |
| Namibia       | 4695   | 9387  | 8.9  | 423.1  | 0.4 | 2.8  | 25 | 7  | 29 | 824.3  | 3    | 11.6   | 4600  | 2671062  |
| Nepal         | 732.3  | 2471  | 6.1  | 44.4   | 0.6 | 2    | 10 | 6  | 20 | 147.2  | 204  | 23.3   | 790   | 6323417  |
| Netherlands   | 44490  | 47900 | 10.7 | 4746   | 3.5 | 10.5 | 3  | 9  | 10 | 41.5   | 509  | 791.3  | 46180 | 3975194  |
| New Zealand   | 38419  | 33970 | 9.3  | 3553.6 | 3.1 | 11.1 | 3  | 7  | 13 | 267.7  | 18   | 186.8  | 38970 | 10162494 |
| Nicaragua     | 2087   | 5157  | 7.8  | 162.9  | 0.9 | 1.4  | 16 | 5  | 20 | 130.4  | 52   | 13.2   | 2130  | 4136422  |
| Niger         | 359    | 906   | 7.2  | 25.7   | 0   | 0.1  | 14 | 10 | 48 | 1267   | 17   | 7.7    | 360   | 7336087  |
| Nigeria       | 2640   | 5231  | 3.6  | 97.3   | 0.4 | 1.6  | 12 | 12 | 39 | 923.8  | 210  | 397.5  | 2080  | 19095227 |

|                       |       |        |      |        |     |      |    |    |    |         |     |        |       |          |
|-----------------------|-------|--------|------|--------|-----|------|----|----|----|---------|-----|--------|-------|----------|
| North Korea           | NA    | NA     | NA   | NA     | 3.5 | 4.1  | 43 | 9  | 14 | 120.5   | 212 | NA     | NA    | NA       |
| Norway                | 74458 | 68012  | 10   | 7464.1 | 4.4 | 17.8 | 3  | 8  | 11 | 385.2   | 14  | 401.4  | 75990 | 872707   |
| Oman                  | 15643 | 36290  | 3.8  | 636.5  | 1.9 | 4.2  | 5  | 3  | 19 | 309.5   | 15  | 66.9   | 14440 | 332780   |
| Pakistan              | 1429  | 5311   | 2.7  | 38     | 1   | 0.5  | 21 | 7  | 28 | 796.1   | 256 | 311.7  | 1580  | 24114455 |
| Palau                 | 13499 | 12831  | 10.6 | 1420.2 | 1.2 | 5.3  | NA | 10 | 12 | 0.5     | 47  | 0.3    | 12530 | NA       |
| Panama                | 13269 | 19178  | 7    | 920.6  | 1.6 | 2.3  | 9  | 5  | 20 | 75.4    | 55  | 53.7   | 13100 | 1728208  |
| Papua New Guinea      | 2222  | 3403   | 3.8  | 77.3   | 0.1 | 0.5  | NA | 7  | 28 | 462.8   | 18  | 19.8   | 2410  | 62888    |
| Paraguay              | 4161  | 8380   | 7.8  | 321.3  | 1.3 | 1    | 11 | 6  | 21 | 406.8   | 17  | 26.7   | 3920  | 10466641 |
| Peru                  | 6119  | 11789  | 5.3  | 323    | 1.1 | 1.5  | 9  | 6  | 19 | 1285.2  | 25  | 191.9  | 5970  | 5156044  |
| Philippines           | 2900  | 9154   | 4.4  | 126.9  | NA  | 0.2  | 14 | 7  | 23 | 300     | 352 | 383.5  | 3660  | 2599466  |
| Poland                | 12302 | 26150  | 6.3  | 796.7  | 2.3 | 5.7  | 3  | 10 | 10 | 312.7   | 124 | 482.5  | 12710 | 5755071  |
| Portugal              | 19227 | 27315  | 9    | 1721.7 | 4.4 | 6.4  | 3  | 11 | 8  | 92.2    | 112 | 204    | 19820 | 1173975  |
| Puerto Rico           | 27966 | NA     | NA   | NA     | NA  | NA   | NA | 8  | 9  | 8.9     | 376 | 66.3   | 19460 | 257248   |
| Qatar                 | 74720 | 116818 | 3.1  | 2029.5 | 2   | 5.7  | NA | 2  | 10 | 11.6    | 227 | 161.2  | 61070 | 14590    |
| Republic Of The Congo | 1851  | 5694   | 3.4  | 58.8   | 0.1 | 0.8  | 38 | 7  | 35 | 342     | 15  | 7.2    | 1360  | 72100    |
| Romania               | 9123  | 22646  | 5    | 442.4  | 2.7 | 6.4  | 3  | 13 | 10 | 238.4   | 85  | 195.2  | 9970  | 2068888  |
| Russia                | 9271  | 24233  | 5.6  | 523.8  | 4   | 8.7  | 3  | 13 | 13 | 17098.3 | 9   | 1355.6 | 9230  | 21446360 |
| Rwanda                | 697.3 | 1811   | 7.9  | 56.7   | 0.1 | 0.8  | 36 | 6  | 31 | 26.3    | 495 | 8.8    | 720   | 1123553  |
| Saint Kitts And Nevis | 16590 | 23978  | 5.6  | 907    | NA  | NA   | NA | NA | NA | 0.3     | 213 | 0.9    | 16030 | NA       |
| Saint Lucia           | 7764  | 11695  | 6    | 481.6  | 0.1 | NA   | NA | 8  | 12 | 0.6     | 293 | 1.6    | 8780  | 5345     |
| Saint Vincent         | 6862  | 10499  | 4.2  | 284    | NA  | NA   | 6  | 7  | 16 | 0.4     | 282 | 0.8    | 6990  | 4767     |

|                       |       |       |      |        |     |      |    |    |    |        |      |        |      |          |  |
|-----------------------|-------|-------|------|--------|-----|------|----|----|----|--------|------|--------|------|----------|--|
| And The Grenadines    |       |       |      |        |     |      |    |    |    |        |      |        |      |          |  |
| Samoa                 | 3939  | 5909  | 5.6  | 222.9  | 0.3 | 1.5  | 3  | 5  | 25 | 2.8    | 69   | 0.8    | 4100 | 500071   |  |
| Sao Tome And Principe | 1773  | 2941  | 9.8  | 159.9  | NA  | NA   | 10 | 7  | 34 | 1      | 213  | 0.4    | 1770 | NA       |  |
| Saudi Arabia          | 20482 | 49680 | 5.8  | 1194.1 | 2.6 | 5.2  | 6  | 4  | 20 | 2149.7 | 15   | 661.5  | 2008 | 4865030  |  |
| Senegal               | 910.8 | 2384  | 4    | 36.1   | 0.1 | 0.3  | 11 | 6  | 36 | 196.7  | 82   | 15.1   | 950  | 3260855  |  |
| Serbia                | 4125  | 13019 | 9.4  | 491.3  | 2.5 | 4.7  | 6  | 14 | 9  | 88.4   | 80   | 36.4   | 5180 | 903713   |  |
| Seychelles            | 14903 | 26077 | 3.4  | 491.8  | 1   | 4.4  | NA | 8  | 17 | 0.5    | 208  | 1.4    | 1418 | 5060     |  |
| Sierra Leone          | 693.4 | 1240  | 18.3 | 106.7  | 0   | 0.3  | 26 | 13 | 35 | 72.3   | 105  | 3.8    | 510  | 98632    |  |
| Singapore             | 52284 | 82503 | 4.3  | 2280.3 | 2.3 | 7.1  | NA | 5  | 9  | 0.7    | 7916 | 306    | 5453 | NA0      |  |
| Slovakia              | 15957 | 29467 | 6.9  | 1108.4 | 3.5 | 6    | 3  | 10 | 11 | 49     | 113  | 90.3   | 1661 | 4633580  |  |
| Slovenia              | 20671 | 30594 | 8.5  | 1771.6 | 2.8 | 8.8  | 3  | 10 | 10 | 20.3   | 103  | 45.5   | 2200 | 4715840  |  |
| Solomon Islands       | 1982  | 1872  | 8    | 152.1  | 0.2 | 1.8  | 12 | 5  | 29 | 28.9   | 22   | 1.2    | 1920 | NA       |  |
| Somalia               | 551.9 | NA    | NA   | NA     | 0   | 0.1  | NA | 11 | 43 | 637.7  | 24   | NA     | NA   | 4409430  |  |
| South Africa          | 5744  | 11923 | 8.2  | 470.8  | 0.8 | 5.2  | 6  | 10 | 21 | 1219.1 | 47   | 308.2  | 5430 | 13919931 |  |
| South Korea           | 27439 | 35945 | 7.4  | 2012.7 | 2.3 | 6.9  | 3  | 6  | 8  | 100.3  | 528  | 1460.5 | 2838 | 33421310 |  |
| South Sudan           | 730.6 | 963   | 2.5  | 28     | NA  | NA   | NA | 11 | 36 | 644.3  | NA   | 4.8    | 390  | NA       |  |
| Spain                 | 26018 | 34258 | 9.2  | 2353.9 | 3.9 | 5.3  | 3  | 9  | 9  | 505.9  | 93   | 1265.9 | 2718 | 58407160 |  |
| Sri Lanka             | 3974  | 11326 | 3    | 117.9  | 0.9 | 2.8  | 11 | 7  | 15 | 65.6   | 342  | 82.4   | 3840 | 1265037  |  |
| Sudan                 | 2089  | 4119  | 6.3  | 151.8  | 0.3 | 1.2  | 25 | 7  | 33 | 1879.4 | 23   | 96.4   | 2380 | 31425786 |  |
| Suriname              | 8983  | 13306 | 6.5  | 577.5  | NA  | NA   | 8  | 7  | 18 | 163.8  | 4    | 3.4    | 6020 | 123630   |  |
| Swaziland             | 3155  | 7620  | 7    | 232.7  | 0.1 | 1.4  | 21 | 10 | 29 | 17.4   | 79   | 4.1    | 2960 | 627486   |  |
| Sweden                | 50414 | 47766 | 11   | 5600.1 | 4.2 | 11.9 | 3  | 9  | 12 | 447.4  | 25   | 529.5  | 5259 | 15362450 |  |

|             |       |       |      |        |     |      |    |    |    |        |     |         |      |         |
|-------------|-------|-------|------|--------|-----|------|----|----|----|--------|-----|---------|------|---------|
| Switzerland | 80130 | 57625 | 12.1 | 9818   | 4.2 | 18.2 | 3  | 8  | 11 | 41.3   | 214 | 682.1   | 8056 | 1597484 |
|             |       |       |      |        |     |      |    |    |    |        |     |         | 0    |         |
| Syria       | 2080  | 2337  | NA   | NA     | 1.5 | 2.3  | NA | 6  | 21 | 185.2  | 99  | NA      | NA   | 1066654 |
| Tajikistan  | 925.9 | 3317  | 6.9  | 63     | 1.7 | 5.3  | NA | 5  | 29 | 141.4  | 64  | 8.8     | 990  | 2006485 |
| Tanzania    | 839.6 | 2655  | 6.1  | 31.7   | 0   | 0.4  | 32 | 7  | 38 | 947.3  | 65  | 50.4    | 910  | 2396790 |
|             |       |       |      |        |     |      |    |    |    |        |     |         | 2    |         |
| Thailand    | 5812  | 15516 | 3.8  | 217.1  | 0.5 | 2.3  | 9  | 8  | 10 | 513.1  | 135 | 411.7   | 5960 | 4312408 |
| Togo        | 547.9 | 1453  | 6.6  | 36.6   | 0.1 | 0.3  | 16 | 9  | 34 | 56.8   | 143 | 4.7     | 610  | 307500  |
| Tonga       | 4090  | 5547  | 5.9  | 221.4  | 0.6 | 3.9  | NA | 6  | 24 | 0.8    | 150 | 0.4     | 4010 | 18762   |
| Trinidad    | 20445 | 28622 | 6    | 1146.2 | 1.8 | 3.3  | 5  | 10 | 14 | 5.1    | 267 | 21      | 1535 | NA      |
| And         |       |       |      |        |     |      |    |    |    |        |     |         | 0    |         |
| Tobago      |       |       |      |        |     |      |    |    |    |        |     |         |      |         |
| Tunisia     | 3822  | 10275 | 6.7  | 258    | 1.3 | 2.6  | 5  | 6  | 18 | 163.6  | 74  | 40.4    | 3500 | 654260  |
| Turkey      | 9127  | 24804 | 4.1  | 454.6  | 1.7 | 2.6  | 3  | 6  | 16 | 785.4  | 105 | 882.9   | 1093 | 1395320 |
|             |       |       |      |        |     |      |    |    |    |        |     |         | 0    | 5       |
| Turkmenist  | 6947  | 15594 | 6.3  | 405.1  | 2.3 | 4.8  | 6  | 7  | 25 | 488.1  | 12  | 38.3    | 6650 | 2216500 |
| an          |       |       |      |        |     |      |    |    |    |        |     |         |      |         |
| Uganda      | 675.6 | 1658  | 7.3  | 46.1   | 0.1 | 0.6  | 41 | 9  | 42 | 241.6  | 214 | 25.6    | 600  | 1401214 |
|             |       |       |      |        |     |      |    |    |    |        |     |         |      | 2       |
| Ukraine     | 2022  | 8130  | 6.1  | 125    | 3   | 7    | 3  | 15 | 10 | 603.6  | 77  | 101.5   | 2390 | 4531900 |
| United      | 40406 | 67805 | 3.5  | 1402   | 1.6 | 3.1  | 3  | 2  | 10 | 83.6   | 112 | 367.8   | 3913 | 44320   |
| Arab        |       |       |      |        |     |      |    |    |    |        |     |         | 0    |         |
| Emirates    |       |       |      |        |     |      |    |    |    |        |     |         |      |         |
| United      | 44039 | 39116 | 9.9  | 4355.8 | 2.8 | 8.4  | 3  | 9  | 12 | 243.6  | 273 | 2675.9  | 4053 | 1006059 |
| Kingdom     |       |       |      |        |     |      |    |    |    |        |     |         | 0    | 0       |
| United      | 55629 | 54941 | 16.8 | 9535.9 | 2.6 | NA   | 3  | 8  | 12 | 9831.5 | 36  | 18980.3 | 5827 | 8982610 |
| States      |       |       |      |        |     |      |    |    |    |        |     |         | 0    | 6       |
| Uruguay     | 15572 | 19930 | 9.2  | 1281.3 | 3.7 | 5.5  | 3  | 9  | 14 | 176.2  | 20  | 52.7    | 1525 | 1184269 |
|             |       |       |      |        |     |      |    |    |    |        |     |         | 0    | 5       |
| Uzbekistan  | 2232  | 6470  | 6.2  | 133.9  | 2.5 | 12.5 | 7  | 5  | 23 | 447.4  | 76  | 64.2    | 1980 | 7457900 |
| Vanuatu     | 3080  | 2995  | 3.5  | 99     | 0.2 | 2.2  | 7  | 5  | 26 | 12.2   | 23  | 0.8     | 2920 | NA      |
| Venezuela   | 11926 | 10672 | 3.2  | 973    | NA  | NA   | 12 | 6  | 19 | 912.1  | 36  | NA      | NA   | 1330297 |
|             |       |       |      |        |     |      |    |    |    |        |     |         |      | 6       |
| Vietnam     | 2076  | 5859  | 5.7  | 116.7  | 0.8 | 1.4  | 11 | 6  | 17 | 331    | 308 | 206.9   | 2170 | 3710385 |
| Yemen       | 1340  | 1239  | 6    | 72     | 0.3 | 0.8  | 34 | 6  | 32 | 528    | 54  | 28.3    | 1030 | 1721906 |
| Zambia      | 1308  | 3557  | 5.4  | 69.4   | 0.1 | 0.9  | 45 | 8  | 38 | 752.6  | 23  | 22.3    | 1300 | 3445630 |
| Zimbabwe    | 890.4 | 1683  | 10.3 | 94.3   | 0.1 | 1.2  | 47 | 8  | 33 | 390.8  | 43  | 15.1    | 910  | 5106673 |

| Country             | Chicken population | Goat population | Horse population | Pig population | Sheep population | National rainfall index | Poverty index | Poverty Headcount percent | Number poor | GERD US dollar | Research & development expenditure percent GDP | Human microbe | Zoonotic microbe | Emerging microbe | Total microbe |
|---------------------|--------------------|-----------------|------------------|----------------|------------------|-------------------------|---------------|---------------------------|-------------|----------------|------------------------------------------------|---------------|------------------|------------------|---------------|
| Afghanistan         | 12136388           | 7216121         | 142043           | NA             | 8725266          | 185.00                  | 0.27          | 56.10                     | 19442.00    | NA             | NA                                             | 14            | 7                | 11               | 18            |
| Albania             | 5937753            | 810133          | 97461            | 158818         | 1808803          | 1136.00                 | 0.01          | 2.03                      | 60.00       | NA             | 0.15                                           | 4             | 3                | 3                | 8             |
| Algeria             | 62892080           | 2875820         | 41560            | 5703           | 16331022         | 241.50                  | 0.01          | 2.11                      | 858.00      | 908894.66      | 0.53                                           | 20            | 13               | 14               | 27            |
| American Samoa      | 35429              | NA              | NA               | 16904          | NA               | NA                      | NA            | NA                        | NA          | NA             | NA                                             | 1             | NA               | 1                | 2             |
| Andorra             | NA                 | 371             | 688              | NA             | 2656             | NA                      | NA            | NA                        | NA          | NA             | NA                                             | 1             | NA               | 1                | 1             |
| Angola              | 27207038           | 4164696         | 4394             | 2603364        | 1065019          | 1137.00                 | 0.28          | 51.17                     | 14743.00    | NA             | NA                                             | 12            | 6                | 9                | 16            |
| Antigua And Barbuda | NA                 | NA              | NA               | NA             | NA               | NA                      | NA            | NA                        | NA          | NA             | NA                                             | 1             | NA               | 1                | 4             |
| Argentina           | 24413110           | 3720469         | 1482982          | 2049697        | 11512554         | 1062.00                 | NA            | NA                        | NA          | 1552769.00     | 0.53                                           | 87            | 52               | 41               | 156           |
| Armenia             | NA                 | 31891           | 11430            | 142432         | 713879           | 352.10                  | 0.00          | 0.19                      | 5.00        | 26268.85       | 0.23                                           | 3             | 1                | 1                | 5             |
| Australia           | 74518563           | 555812          | 292356           | 2241733        | 75894699         | 717.10                  | NA            | NA                        | NA          | 23302690.58    | 1.92                                           | 171           | 112              | 69               | 550           |
| Austria             | 13918813           | 80894           | 81637            | 3247180        | 398459           | 1126.00                 | NA            | NA                        | NA          | 13789031.88    | 3.09                                           | 65            | 42               | 26               | 134           |
| Azerbaijan          | 27697665           | 656319          | 75210            | 6143           | 7987313          | 459.70                  | 0.02          | 4.90                      | 477.00      | 75523.26       | 0.19                                           | 8             | 4                | 7                | 9             |
| Bahamas             | NA                 | NA              | NA               | NA             | NA               | 1320.00                 | NA            | NA                        | NA          | NA             | NA                                             | 9             | 3                | 2                | 20            |
| Bahrain             | NA                 | NA              | NA               | NA             | NA               | NA                      | NA            | NA                        | NA          | 33419.36       | 0.10                                           | NA            | NA               | NA               | 5             |
| Bangladesh          | 96849425           | 16191517        | NA               | 206872         | 1291451          | 2309.00                 | 0.19          | 41.07                     | 66916.00    | NA             | NA                                             | 51            | 32               | 34               | 74            |

|                        |            |          |         |         |          |         |      |       |          |             |      |     |     |    |     |
|------------------------|------------|----------|---------|---------|----------|---------|------|-------|----------|-------------|------|-----|-----|----|-----|
| Barbados               | NA         | NA       | NA      | NA      | NA       | NA      | 0-01 | 2-49  | 7-00     | NA          | NA   | 1   | NA  | 1  | 3   |
| Belarus                | 35285344   | 72312    | 35500   | 3319000 | 51830    | 615-70  | NA   | NA    | NA       | 320043-52   | 0-59 | 17  | 7   | 9  | 27  |
| Belgium                | 33380000   | 31560    | 37090   | 6429210 | 99697    | 1070-00 | NA   | NA    | NA       | 13452538-37 | 2-49 | 52  | 35  | 22 | 120 |
| Belize                 | 1764435    | 823      | 6610    | 23201   | 12712    | 2013-00 | 0-02 | 4-35  | 16-00    | NA          | NA   | 3   | 2   | NA | 6   |
| Benin                  | 17483000   | 860000   | 620     | 414000  | 860000   | 959-50  | 0-35 | 63-24 | 6875-00  | NA          | NA   | 14  | 7   | 12 | 16  |
| Bhutan                 | 551183     | 39256    | 17201   | 15375   | 9756     | 2609-00 | 0-18 | 37-34 | 298-00   | NA          | NA   | 1   | 1   | 1  | 4   |
| Bolivia                | 195367524  | 3737024  | 354764  | 2829956 | 6267743  | 1503-00 | 0-09 | 20-45 | 2227-00  | NA          | 0-16 | 24  | 19  | 13 | 31  |
| Bosnia And Herzegovina | NA         | 70604    | NA      | 5290959 | 1054689  | 1019-00 | 0-01 | 2-19  | 77-00    | 36151-88    | 0-20 | 5   | 3   | 3  | 9   |
| Botswana               | 1072507    | 1605642  | 26827   | 11104   | 227247   | 430-40  | NA   | NA    | NA       | 64971-01    | 0-54 | 6   | 3   | 6  | 11  |
| Brazil                 | 1288609639 | 8224507  | 5455565 | 3889336 | 16797594 | 1934-00 | 0-02 | 3-84  | 7978-00  | 21682612-86 | 1-27 | 176 | 122 | 70 | 384 |
| Brunei                 | NA         | NA       | NA      | NA      | NA       | 3564-00 | NA   | NA    | NA       | NA          | 0-04 | 1   | NA  | NA | 2   |
| Bulgaria               | 13986385   | 388291   | 69374   | 469815  | 1528752  | 543-30  | NA   | NA    | NA       | 458801-45   | 0-78 | 23  | 14  | 11 | 49  |
| Burkina Faso           | 25699625   | 11633992 | 37810   | 1572427 | 7770083  | 759-00  | 0-52 | 84-01 | 15665-00 | 86349-19    | 0-22 | 22  | 13  | 16 | 35  |
| Burundi                | 2835179    | 1126579  | NA      | 156138  | 218905   | 997-80  | 0-40 | 74-33 | 7823-00  | NA          | 0-12 | 10  | 5   | 8  | 12  |
| Cambodia               | 15981181   | 564      | 12526   | 2076990 | 13207    | 2348-00 | 0-16 | 34-89 | 5499-00  | 21431-77    | 0-12 | 25  | 15  | 15 | 31  |
| Cameroon               | 11411072   | 1134772  | 14907   | 218080  | 346584   | 1694-00 | 0-24 | 45-40 | 10641-00 | NA          | NA   | 33  | 20  | 24 | 67  |
| Canada                 | 105325593  | 172241   | 390308  | 9582594 | 933430   | 693-60  | NA   | NA    | NA       | 26587191-36 | 1-53 | 119 | 75  | 58 | 291 |
| Cape Verde             | 327562     | 148094   | 340     | 77316   | 10400    | 144-00  | NA   | NA    | NA       | NA          | NA   | 6   | 2   | 5  | 12  |

|                                  |            |           |         |           |           |         |      |       |          |              |      |     |     |    |     |
|----------------------------------|------------|-----------|---------|-----------|-----------|---------|------|-------|----------|--------------|------|-----|-----|----|-----|
| Central African Republic         | NA         | NA        | NA      | NA        | 133620    | 1331·00 | 0·47 | 79·36 | 3646·00  | NA           | NA   | 23  | 13  | 18 | 32  |
| Chad                             | 47867370   | 6287562   | 415386  | 39220     | 6287562   | 648·20  | 0·54 | 85·86 | 12409·00 | 30891·53     | 0·32 | 9   | 5   | 8  | 10  |
| Chile                            | 40362000   | 705527    | 304252  | 2928606   | 3888485   | 2483·00 | NA   | NA    | NA       | 956647·09    | 0·36 | 43  | 31  | 27 | 81  |
| China                            | 3907334138 | 190964383 | 6046000 | 510417525 | 173900001 | 1049·00 | 0·02 | 4·11  | 57629·00 | 266114411·90 | 2·11 | 297 | 187 | 91 | 766 |
| Colombia                         | 156038910  | 1088937   | 1153820 | 4610453   | 1318241   | 2862·00 | 0·02 | 5·03  | 2448·00  | 0·21         | 0·24 | 49  | 29  | 27 | 85  |
| Comoros                          | 221550     | 181000    | NA      | NA        | 19200     | 2304·00 | 0·18 | 37·37 | 297·00   | NA           | NA   | 4   | 3   | 3  | 4   |
| Costa Rica                       | 18589455   | 12852     | 66942   | 435243    | 35800     | 2865·00 | NA   | NA    | NA       | 246292·78    | 0·46 | 15  | 9   | 10 | 38  |
| Croatia                          | 10477514   | 203340    | 11114   | 1726895   | 750877    | 824·20  | NA   | NA    | NA       | 503424·11    | 0·85 | 25  | 16  | 15 | 53  |
| Cuba                             | NA         | 585131    | 365012  | 426890    | 1008338   | 1103·00 | NA   | NA    | NA       | 508658·54    | 0·35 | 23  | 13  | 16 | 35  |
| Cyprus                           | 3048542    | 241636    | 752     | 330391    | 267490    | 344·30  | NA   | NA    | NA       | 128335·30    | 0·50 | 23  | 14  | 15 | 33  |
| Czech Republic                   | 6062700    | 16818     | 24905   | 1906929   | 183826    | 707·10  | NA   | NA    | NA       | NA           | 1·68 | 51  | 28  | 20 | 202 |
| Democratic Republic Of The Congo | 20561809   | 6202825   | NA      | 960305    | 814107    | 1571·00 | 0·38 | 72·46 | 57050·00 | 97433·31     | 0·08 | 36  | 21  | 26 | 53  |
| Denmark                          | 35219669   | 2008      | 59735   | 13173060  | 159626    | 694·00  | NA   | NA    | NA       | 10539667·46  | 2·87 | 72  | 44  | 32 | 129 |
| Djibouti                         | NA         | NA        | NA      | NA        | NA        | 107·40  | 0·17 | 34·63 | 326·00   | NA           | NA   | 6   | 3   | 6  | 8   |
| Dominica                         | NA         | NA        | NA      | NA        | NA        | NA      | NA   | NA    | NA       | NA           | NA   | 1   | NA  | 1  | 5   |
| Dominican Republic               | NA         | NA        | NA      | NA        | NA        | 820·90  | 0·02 | 4·15  | 441·00   | NA           | NA   | 9   | 3   | 5  | 13  |
| East Timor                       | NA         | NA        | NA      | NA        | NA        | NA      | 0·21 | 46·05 | 584·00   | NA           | NA   | 3   | 1   | 3  | 4   |

|                   |          |          |         |          |          |         |      |       |          |              |      |     |    |    |     |
|-------------------|----------|----------|---------|----------|----------|---------|------|-------|----------|--------------|------|-----|----|----|-----|
| Ecuador           | 40823593 | 178191   | 371093  | 1517202  | 1127222  | 2575.00 | 0.02 | 4.49  | 736.00   | 450306.47    | 0.44 | 33  | 21 | 19 | 47  |
| Egypt             | 68452380 | 4174993  | 65971   | NA       | 5365065  | 106.60  | 0.02 | 5.22  | 4992.00  | 1182586.05   | 0.61 | 74  | 48 | 35 | 128 |
| El Salvador       | 35123656 | 6983     | 12843   | 165859   | 11475    | 1434.00 | 0.03 | 7.95  | 504.00   | 35060.00     | 0.15 | 9   | 3  | 8  | 11  |
| Equatorial Guinea | NA       | NA       | NA      | NA       | NA       | 2447.00 | NA   | NA    | NA       | NA           | NA   | 8   | 3  | 8  | 13  |
| Eritrea           | NA       | 4661761  | NA      | 2203     | 2128845  | 333.00  | NA   | NA    | NA       | NA           | NA   | 2   | 1  | 1  | 3   |
| Estonia           | 1611794  | 3669     | 5200    | 327195   | 87140    | 621.40  | NA   | NA    | NA       | 359291.62    | 1.28 | 16  | 11 | 10 | 27  |
| Ethiopia          | 50374607 | 23095013 | 1907050 | 28598    | 22511719 | 1073.00 | 0.49 | 83.82 | 85834.00 | 219631.67    | 0.60 | 34  | 21 | 24 | 52  |
| Fiji              | 3972089  | 100695   | 27123   | 73698    | 14068    | 2376.00 | NA   | NA    | NA       | NA           | NA   | 9   | 5  | 8  | 12  |
| Finland           | 8737149  | 2115     | 74600   | 1173548  | 126309   | 518.30  | NA   | NA    | NA       | 7288311.69   | 2.75 | 54  | 37 | 23 | 112 |
| France            | 68489203 | 1390980  | 410329  | 13817080 | 7458190  | 818.00  | NA   | NA    | NA       | 59218417.95  | 2.25 | 148 | 99 | 64 | 374 |
| Gabon             | 3100001  | 90002    | NA      | 213000   | 195002   | 1842.00 | 0.07 | 15.04 | 298.00   | NA           | 0.58 | 18  | 8  | 14 | 29  |
| Gambia            | 820438   | 228404   | 32268   | 24281    | 129232   | 598.40  | 0.29 | 55.29 | 1127.00  | NA           | 0.13 | 11  | 4  | 9  | 16  |
| Georgia           | 7967100  | 97824    | 38165   | 480695   | 648715   | 1140.00 | NA   | NA    | NA       | 43884.46     | 0.30 | 13  | 8  | 8  | 18  |
| Germany           | 10787000 | 124200   | 470540  | 27341240 | 2129250  | 835.50  | NA   | NA    | NA       | 116944687.10 | 2.94 | 152 | 85 | 41 | 359 |
| Ghana             | 19943642 | 6193315  | NA      | 917141   | 4003190  | 1112.00 | 0.13 | 28.92 | 8158.00  | NA           | 0.38 | 31  | 17 | 16 | 54  |
| Greece            | 27882413 | 3654794  | 26238   | 767958   | 8686117  | 597.80  | NA   | NA    | NA       | 2400236.13   | 1.01 | 51  | 27 | 28 | 84  |
| Grenada           | NA       | NA       | NA      | NA       | NA       | NA      | NA   | NA    | NA       | NA           | NA   | 2   | NA | 1  | 3   |
| Guatemala         | 21518212 | 50152    | 160813  | 419170   | 340682   | 2216.00 | 0.13 | 29.07 | 4821.00  | 19843.54     | 0.03 | 24  | 17 | 14 | 30  |
| Guinea            | 13213984 | 1119001  | 650     | 97205    | 942368   | 1638.00 | 0.34 | 61.95 | 7679.00  | NA           | NA   | 8   | 3  | 7  | 11  |
| Guinea-Bissau     | 1691674  | 737936   | 1124    | 473321   | 314501   | 1223.00 | 0.37 | 67.42 | 1224.00  | NA           | NA   | 10  | 6  | 10 | 12  |



|             |            |           |         |          |          |         |      |       |           |               |      |     |     |    |     |
|-------------|------------|-----------|---------|----------|----------|---------|------|-------|-----------|---------------|------|-----|-----|----|-----|
| Guyana      | NA         | NA        | NA      | NA       | NA       | 2177.00 | 0.01 | 3.37  | 26.00     | NA            | NA   | 4   | 1   | 3  | 6   |
| Haiti       | 7321307    | 2110599   | 274763  | 1095151  | 359390   | 1226.00 | 0.23 | 47.60 | 5163.00   | NA            | NA   | 17  | 7   | 14 | 21  |
| Honduras    | NA         | NA        | NA      | NA       | NA       | 1618.00 | 0.09 | 19.49 | 1776.00   | 2933.59       | 0.01 | 6   | 1   | 6  | 12  |
| Hong Kong   | NA         | NA        | NA      | NA       | NA       | NA      | NA   | NA    | NA        | NA            | 0.80 | 57  | 35  | 31 | 86  |
| Hungary     | 28595000   | 91460     | 68275   | 2935000  | 1239000  | 587.50  | NA   | NA    | NA        | 1914267.32    | 1.21 | 54  | 31  | 24 | 127 |
| Iceland     | 323427     | NA        | 77168   | 3615     | 469429   | 923.40  | NA   | NA    | NA        | 513924.28     | NA   | 7   | 3   | 4  | 16  |
| India       | 606978885  | 151023872 | 405817  | 11048893 | 82826222 | 1502.00 | 0.12 | 27.51 | 364225.00 | 12476582.49   | 0.62 | 229 | 136 | 67 | 496 |
| Indonesia   | 1474592337 | 13490562  | 143147  | 5824080  | 3781797  | 2929.00 | 0.03 | 7.25  | 18922.00  | 2272311.26    | 0.08 | 51  | 29  | 26 | 83  |
| Iran        | 371166000  | 22094251  | 132000  | NA       | 50214615 | 207.10  | NA   | NA    | NA        | 755424.56     | 0.25 | 123 | 77  | 47 | 211 |
| Iraq        | NA         | 1476845   | 48300   | NA       | 7722375  | 225.00  | 0.06 | 14.66 | 5453.00   | 86052.74      | 0.04 | 14  | 8   | 7  | 19  |
| Ireland     | 10537388   | 10520     | 106020  | 1516291  | 6339633  | 1202.00 | NA   | NA    | NA        | 3649704.84    | 1.18 | 36  | 22  | 19 | 55  |
| Israel      | NA         | 32559     | NA      | NA       | 305603   | 391.60  | NA   | NA    | NA        | 16093372.32   | 4.25 | 47  | 29  | 22 | 91  |
| Italy       | 139031114  | 754209    | 174706  | 9331143  | 6218034  | 830.20  | NA   | NA    | NA        | 27574079.10   | 1.29 | 152 | 98  | 54 | 321 |
| Ivory Coast | 17125712   | 884603    | NA      | 476708   | 901115   | 1187.00 | 0.24 | 46.11 | 10926.00  | NA            | NA   | 20  | 11  | 12 | 36  |
| Jamaica     | 11026836   | 420188    | 1855    | 361540   | 11058    | 1328.00 | 0.02 | 4.69  | 135.00    | NA            | NA   | 8   | 2   | 5  | 15  |
| Japan       | 301377000  | 19454     | 74302   | 9684730  | 16096    | 1578.00 | NA   | NA    | NA        | 15859251.2.40 | 3.14 | 263 | 168 | 70 | 586 |
| Jordan      | 20999241   | 559006    | 7987    | NA       | 2495776  | 148.80  | 0.01 | 1.30  | 123.00    | 277439.31     | 0.33 | 6   | 4   | 4  | 7   |
| Kazakhstan  | 33139260   | 2821328   | 1686200 | 1031600  | 14811972 | 274.50  | 0.00 | 0.45  | 81.00     | 211301.23     | 0.14 | 7   | 5   | 5  | 17  |
| Kenya       | 31827529   | 27740153  | NA      | 334669   | 17129606 | 902.10  | 0.18 | 38.87 | 18837.00  | NA            | NA   | 64  | 40  | 40 | 105 |
| Kiribati    | NA         | NA        | NA      | NA       | NA       | NA      | NA   | NA    | NA        | NA            | NA   | 1   | NA  | 1  | 3   |

|               |           |         |         |         |         |         |      |       |          |            |      |     |    |    |     |
|---------------|-----------|---------|---------|---------|---------|---------|------|-------|----------|------------|------|-----|----|----|-----|
| Kuwait        | 44202697  | 153391  | NA      | NA      | 628041  | 67.35   | NA   | NA    | NA       | 98121.88   | 0.08 | 18  | 13 | 11 | 39  |
| Kyrgyzstan    | 4592057   | 945151  | 397988  | 54955   | 3047736 | 372.50  | 0.01 | 2.29  | 136.00   | 8247.42    | 0.11 | 7   | 4  | 5  | 12  |
| Laos          | 16047773  | 212539  | NA      | 2663363 | 20316   | 1933.00 | 0.21 | 40.49 | 2737.00  | NA         | 0.04 | 15  | 10 | 6  | 17  |
| Latvia        | 4377805   | 12217   | 10165   | 384746  | 81436   | 605.40  | NA   | NA    | NA       | 162809.92  | 0.44 | 12  | 5  | 6  | 22  |
| Lebanon       | NA        | 403860  | NA      | NA      | 265344  | 557.50  | NA   | NA    | NA       | NA         | NA   | 9   | 6  | 7  | 10  |
| Lesotho       | 453085    | 824699  | 55398   | 63416   | 1346597 | 734.90  | 0.15 | 33.64 | 741.00   | 1152.16    | 0.05 | 1   | 1  | 1  | 1   |
| Liberia       | 951260    | 96750   | NA      | 64990   | 48450   | 2413.00 | 0.33 | 64.90 | 2994.00  | NA         | NA   | 8   | 4  | 7  | 9   |
| Libya         | NA        | 1250315 | 35000   | NA      | 5030673 | 140.60  | 0.01 | 1.97  | 124.00   | NA         | NA   | 6   | 4  | 6  | 7   |
| Liechtenstein | 12000     | 452     | 312     | 1811    | 3963    | NA      | NA   | NA    | NA       | NA         | NA   | 1   | 1  | NA | 1   |
| Lithuania     | 9465819   | 14988   | 45325   | 942163  | 52843   | 585.40  | NA   | NA    | NA       | 441056.67  | 0.85 | 26  | 9  | 6  | 47  |
| Luxembourg    | 100787    | NA      | 6365    | 77841   | 8064    | NA      | NA   | NA    | NA       | 820070.84  | 1.24 | 5   | 2  | 4  | 7   |
| Macedonia     | 1713878   | 131066  | 32548   | 173185  | 749341  | 621.50  | 0.01 | 2.53  | 53.00    | 42038.50   | NA   | 1   | 1  | 1  | 4   |
| Madagascar    | 24213520  | 1218219 | NA      | 1247036 | 695228  | 1541.00 | 0.45 | 77.79 | 19366.00 | 1679.45    | 0.01 | 21  | 12 | 19 | 29  |
| Malawi        | 75577457  | 262301  | NA      | 792364  | 76610   | 1125.00 | 0.24 | 52.73 | 9539.00  | NA         | NA   | 17  | 8  | 17 | 21  |
| Malaysia      | 251157340 | 458646  | 4782    | 1831251 | 131923  | 3194.00 | NA   | NA    | NA       | 4112882.03 | 1.30 | 81  | 50 | 33 | 156 |
| Maldives      | NA        | NA      | NA      | NA      | NA      | NA      | 0.01 | 1.88  | 8.00     | NA         | NA   | 56  | 39 | 39 | 63  |
| Mali          | 38587450  | 9206601 | 527970  | 105349  | 8239797 | 577.60  | 0.46 | 78.11 | 14056.00 | 44754.27   | 0.29 | 20  | 7  | 10 | 30  |
| Malta         | 966810    | 4384    | NA      | 70593   | 11873   | NA      | NA   | NA    | NA       | 72153.48   | 0.60 | 3   | 2  | 3  | 4   |
| Mauritania    | NA        | 782450  | 188     | NA      | 1236549 | 190.30  | 0.26 | 50.60 | 2176.00  | NA         | 0.18 | 7   | 4  | 6  | 12  |
| Mauritius     | NA        | 27361   | NA      | 15287   | 2177    | NA      | NA   | NA    | NA       | 48578.89   |      | 4   | 2  | 3  | 9   |
| Mexico        | 356824347 | 8989262 | 1328524 | 8964101 | 7306600 | 1052.00 | 0.03 | 6.32  | 8061.00  | 5081339.53 | 0.49 | 102 | 61 | 48 | 234 |

|             |           |          |         |          |          |         |      |       |          |             |      |    |    |    |     |
|-------------|-----------|----------|---------|----------|----------|---------|------|-------|----------|-------------|------|----|----|----|-----|
| Micronesia  | NA        | NA       | NA      | NA       | NA       | NA      | NA   | NA    | NA       | NA          | NA   | 6  | 2  | 6  | 8   |
| Moldova     | 10399134  | 131840   | 51275   | 410400   | 692160   | 541.30  | 0.00 | 0.94  | 38.00    | NA          | 0.30 | 2  | 1  | 2  | 3   |
| Mongolia    | 469414    | 17601985 | 2328541 | 40421    | 18119414 | 177.50  | 0.04 | 10.24 | 310.00   | 15407.33    | 0.13 | 15 | 5  | 9  | 26  |
| Morocco     | NA        | 5178300  | 158800  | 4783     | 16114000 | 287.90  | 0.09 | 18.57 | 6550.00  | NA          | 0.71 | 29 | 16 | 16 | 50  |
| Mozambique  | 22636314  | 933931   | 18489   | 1340712  | 347933   | 1005.00 | 0.41 | 72.54 | 20913.00 | 31408.62    | 0.34 | 13 | 5  | 6  | 23  |
| Myanmar     | 171724243 | 3782501  | NA      | 10248983 | 767033   | 2329.00 | 0.18 | 38.35 | 20280.00 | 21181.75    | 0.16 | 19 | 11 | 11 | 26  |
| Namibia     | 458010    | 2131929  | 41130   | 52485    | 2693149  | 339.00  | 0.18 | 40.59 | 1007.00  | 35442.06    | 0.34 | 7  | 5  | 5  | 14  |
| Nepal       | 22948864  | 10652326 | 17871   | 842546   | 600010   | 1751.00 | 0.15 | 35.25 | 10217.00 | NA          | 0.30 | 26 | 18 | 19 | 44  |
| Netherlands | 101247711 | 352828   | 142531  | 12254972 | 1129500  | 893.10  | NA   | NA    | NA       | 17326446.28 | 2.03 | 74 | 43 | 34 | 153 |
| New Zealand | NA        | 84352    | 56832   | 174212   | 31226422 | 1154.00 | NA   | NA    | NA       | 2168166.09  | 1.26 | 35 | 19 | 21 | 69  |
| Nicaragua   | 12715158  | 15924    | 361680  | 418485   | 105610   | 2013.00 | 0.07 | 16.30 | 1003.00  | 12429.12    | 0.11 | 12 | 5  | 6  | 18  |
| Niger       | 6674216   | 11238266 | 230175  | 39000    | 9192020  | 310.40  | 0.59 | 90.59 | 18727.00 | NA          | NA   | 11 | 4  | 6  | 13  |
| Nigeria     | 108539888 | 65652372 | 101509  | 6040819  | 37440022 | 1295.00 | 0.29 | 51.95 | 96623.00 | NA          | 0.22 | 58 | 38 | 38 | 90  |
| North Korea | NA        | NA       | NA      | NA       | NA       | NA      | NA   | NA    | NA       | NA          | NA   | 2  | 1  | 2  | 2   |
| Norway      | 14273145  | 63292    | 36396   | 810605   | 2300464  | 1414.00 | NA   | NA    | NA       | 8571621.79  | 2.03 | 47 | 35 | 25 | 109 |
| Oman        | NA        | 1719120  | NA      | NA       | 388590   | 23.44   | NA   | NA    | NA       | 163013.31   | 0.22 | 18 | 13 | 6  | 30  |
| Pakistan    | 160611310 | 45738255 | 259130  | NA       | 15025659 | 355.60  | 0.23 | 43.88 | 84773.00 | 715169.98   | 0.25 | 47 | 26 | 24 | 76  |
| Palau       | NA        | NA       | NA      | NA       | NA       | NA      | NA   | NA    | NA       | NA          | NA   | NA | NA | NA | 6   |
| Panama      | 18719174  | 8348     | 114269  | 322121   | 18665    | 2461.00 | NA   | NA    | NA       | 28300.00    | 0.06 | 31 | 21 | 15 | 44  |

|                                  |           |         |        |          |          |         |      |       |         |             |      |     |    |    |     |
|----------------------------------|-----------|---------|--------|----------|----------|---------|------|-------|---------|-------------|------|-----|----|----|-----|
| Papua New Guinea                 | NA        | NA      | NA     | NA       | NA       | 3250.00 | NA   | NA    | NA      | 6439.44     | 0.03 | 15  | 6  | 13 | 23  |
| Paraguay                         | 16055854  | 129898  | 283804 | 1072655  | 364514   | 1228.00 | 0.02 | 4.57  | 308.00  | 42525.70    | 0.15 | 7   | 4  | 5  | 21  |
| Peru                             | 118070907 | 1946217 | 579577 | 2223893  | 9522592  | 2229.00 | 0.05 | 12.45 | 3954.00 | 252940.43   | 0.12 | 42  | 29 | 27 | 59  |
| Philippines                      | 134115530 | 3801523 | 247916 | 12325686 | 48821    | 2640.00 | 0.04 | 7.41  | 7653.00 | 315768.06   | 0.14 | 34  | 21 | 21 | 44  |
| Poland                           | 155002798 | 89800   | 263795 | 15276334 | 218400   | 600.90  | NA   | NA    | NA      | 5697259.14  | 0.97 | 51  | 37 | 27 | 111 |
| Portugal                         | 34368861  | 405622  | 33522  | 1851290  | 2211173  | 920.70  | NA   | NA    | NA      | 3025632.82  | 1.27 | 68  | 42 | 27 | 134 |
| Puerto Rico                      | 9039659   | 4344    | 8965   | 48016    | 10759    | 1093.00 | NA   | NA    | NA      | NA          | 0.43 | 24  | 16 | 18 | 39  |
| Qatar                            | NA        | 216048  | 4059   | NA       | 448477   | 36.00   | NA   | NA    | NA      | 839159.34   | 0.51 | 5   | 4  | 2  | 7   |
| Republic Of The Congo            | NA        | 49159   | NA     | 15455    | 7106     | 1653.00 | 0.19 | 40.42 | 2072.00 | NA          | NA   | 13  | 4  | 12 | 20  |
| Romania                          | 67147608  | 1417176 | 524741 | 5041788  | 9518225  | 647.40  | NA   | NA    | NA      | 1095151.45  | 0.48 | 27  | 17 | 16 | 41  |
| Russia                           | 355477700 | NA      | NA     | 19334130 | 19937700 | 489.30  | NA   | NA    | NA      | 16262724.20 | 1.10 | 114 | 69 | 51 | 230 |
| Rwanda                           | 9845546   | 3305917 | NA     | 716593   | 630842   | 1052.00 | 0.27 | 55.84 | 6655.00 | NA          | NA   | 9   | 3  | 9  | 12  |
| Saint Kitts And Nevis            | NA        | NA      | NA     | NA       | NA       | NA      | NA   | NA    | NA      | NA          | NA   | NA  | NA | NA | 3   |
| Saint Lucia                      | 129861    | 8816    | NA     | 19520    | 7736     | NA      | 0.01 | 1.92  | 3.00    | NA          | 0.33 | 1   | NA | 1  | 2   |
| Saint Vincent And The Grenadines | 65920     | NA      | NA     | 4807     | NA       | NA      | NA   | NA    | NA      | NA          | NA   | 1   | NA | 1  | 2   |
| Samoa                            | 30760     | 128     | NA     | NA       | 249      | NA      | NA   | NA    | NA      | NA          | NA   | 6   | 2  | 6  | 7   |

|                             |               |              |        |              |              |             |      |       |              |                 |      |     |    |    |     |
|-----------------------------|---------------|--------------|--------|--------------|--------------|-------------|------|-------|--------------|-----------------|------|-----|----|----|-----|
| Sao Tome<br>And<br>Principe | NA            | NA           | NA     | NA           | NA           | NA          | 0-09 | 22-12 | 44-00        | NA              | NA   | 3   | 1  | 1  | 3   |
| Saudi<br>Arabia             | 5859096<br>46 | 107539<br>4  | NA     | NA           | 624990<br>4  | 128-6<br>0  | NA   | NA    | NA           | 6086391-<br>81  | 0-82 | 49  | 29 | 28 | 70  |
| Senegal                     | 4417048<br>6  | 459830<br>3  | 517715 | 344165       | 538290<br>3  | 576-0<br>0  | 0-29 | 54-43 | 8389-0<br>0  | 104203-8<br>5   | 0-75 | 38  | 24 | 26 | 51  |
| Serbia                      | 2133848<br>9  | 230091       | 16855  | 370470<br>2  | 172750<br>3  | NA          | 0-00 | 0-34  | 30-00        | 385403-2<br>0   | 0-93 | 6   | 3  | 4  | 17  |
| Seychelle<br>s              | NA            | 802          | NA     | 9490         | NA           | NA          | NA   | NA    | NA           | 3087-07         | 0-22 | 3   | 2  | 3  | 4   |
| Sierra<br>Leone             | 4336349       | 814269       | NA     | 57877        | 574706       | 2546-<br>00 | 0-42 | 76-49 | 5657-0<br>0  | NA              | NA   | 7   | 4  | 7  | 11  |
| Singapore                   | NA            | NA           | NA     | NA           | NA           | NA          | NA   | NA    | NA           | 6898115-<br>94  | 2-16 | 55  | 31 | 36 | 69  |
| Slovakia                    | 1105445<br>9  | 34053        | 6937   | 580393       | 376978       | 762-7<br>0  | NA   | NA    | NA           | 35063-44        | 0-79 | 20  | 13 | 8  | 49  |
| Slovenia                    | 4005852       | 34864        | 22517  | 308540       | 137737       | 949-3<br>0  | NA   | NA    | NA           | 945847-7<br>0   | 2-00 | 21  | 13 | 14 | 40  |
| Solomon<br>Islands          | NA            | NA           | NA     | NA           | NA           | 2945-<br>00 | NA   | NA    | NA           | NA              | NA   | 10  | 3  | 9  | 13  |
| Somalia                     | 2748355       | 261595<br>67 | NA     | 4002         | 149090<br>95 | 408-3<br>0  | 0-52 | 82-22 | 11773-<br>00 | NA              | NA   | 11  | 5  | 8  | 13  |
| South<br>Africa             | 1835831<br>55 | 613814<br>6  | 284693 | 197993<br>1  | 203316<br>85 | 548-3<br>0  | 0-03 | 8-22  | 4604-0<br>0  | 2695640-<br>28  | 0-80 | 76  | 45 | 38 | 162 |
| South<br>Korea              | 1495113<br>09 | 256211       | 29670  | 991220<br>4  | 3027         | NA          | NA   | NA    | NA           | NA              | 4-23 | 88  | 53 | 35 | 219 |
| South<br>Sudan              | NA            | NA           | NA     | NA           | NA           | NA          | 0-58 | 91-92 | 11242-<br>00 | NA              | NA   | 2   | 2  | 2  | 6   |
| Spain                       | 1988950<br>09 | 236346<br>0  | 160283 | 247120<br>57 | 165728<br>68 | 536-0<br>0  | NA   | NA    | NA           | 16590318<br>.77 | 1-19 | 151 | 93 | 54 | 384 |
| Sri Lanka                   | 1663026<br>0  | 303888       | NA     | 105210       | 6202         | 1656-<br>00 | NA   | NA    | NA           | 78084-62        | 0-11 | 10  | 6  | 9  | 19  |
| Sudan                       | 3502492<br>2  | 392126<br>54 | 786146 | NA           | 458837<br>79 | NA          | 0-28 | 52-40 | 20738-<br>00 | NA              | 0-30 | 24  | 18 | 16 | 40  |
| Suriname                    | NA            | NA           | NA     | NA           | 450          | 1848-<br>00 | 0-04 | 9-38  | 52-00        | NA              | NA   | 2   | NA | 2  | 4   |
| Swazilan<br>d               | 1936344       | 458516       | 1183   | 38915        | 15973        | 648-0<br>0  | 0-08 | 19-59 | 263-00       | NA              | NA   | 1   | 1  | 1  | 3   |

|                      |            |          |         |          |          |         |      |       |          |             |      |     |     |    |     |
|----------------------|------------|----------|---------|----------|----------|---------|------|-------|----------|-------------|------|-----|-----|----|-----|
| Sweden               | 5388028    | NA       | 95445   | 1464024  | 563869   | 700.40  | NA   | NA    | NA       | 17524559.99 | 3.25 | 76  | 47  | 31 | 154 |
| Switzerland          | 8741117    | 85131    | 60156   | 1557204  | 431889   | 1450.00 | NA   | NA    | NA       | 22555188.14 | 3.37 | 46  | 28  | 19 | 106 |
| Syria                | 12827000   | 2378105  | 16052   | NA       | 17884310 | 375.80  | 0.03 | 7.39  | 1362.00  | 1885.47     | 0.01 | 10  | 4   | 4  | 15  |
| Tajikistan           | 46305068   | 174476   | 76301   | 694      | 2846727  | 338.60  | 0.05 | 12.11 | 1058.00  | 8257.31     | 0.12 | 4   | 3   | 3  | 9   |
| Tanzania             | 26839380   | 13649567 | 71      | 1602764  | 5724316  | 1114.00 | 0.28 | 55.63 | 30915.00 | 168477.48   | 0.53 | 34  | 23  | 24 | 53  |
| Thailand             | 191375293  | 468377   | 8871    | 9504920  | 43901    | 1724.00 | 0.00 | 0.79  | 543.00   | 3345757.22  | 0.78 | 117 | 69  | 49 | 208 |
| Togo                 | NA         | 2061700  | 1848    | 282156   | 1657114  | 1071.00 | 0.25 | 48.37 | 3679.00  | 10343.83    | 0.27 | 14  | 9   | 11 | 17  |
| Tonga                | 92071      | 1744     | 1942    | 110310   | 1240     | NA      | NA   | NA    | NA       | NA          | NA   | 1   | NA  | 1  | 3   |
| Trinidad And Tobago  | NA         | NA       | NA      | 35273    | NA       | 1839.00 | 0.00 | 0.64  | 9.00     | 20128.32    | 0.09 | 20  | 14  | 16 | 24  |
| Tunisia              | NA         | 1272460  | 24653   | NA       | 6802420  | 326.10  | 0.01 | 1.32  | 151.00   | 223966.94   | 0.60 | 37  | 26  | 21 | 62  |
| Turkey               | 312242044  | 11007764 | 122724  | 1642     | 30366212 | 614.50  | NA   | NA    | NA       | 6183818.97  | 0.88 | 64  | 46  | 30 | 140 |
| Turkmenistan         | 16875300   | 2402106  | 25500   | NA       | 14755794 | 71.38   | 0.00 | 0.40  | 23.00    | NA          | NA   | 4   | 2   | 2  | 6   |
| Uganda               | 33192614   | 10435223 | 1247    | 2059709  | 3474322  | 1350.00 | 0.28 | 56.76 | 23549.00 | 32695.32    | 0.17 | 43  | 26  | 32 | 72  |
| Ukraine              | 196268844  | 493596   | 316800  | 7350700  | 877504   | 1813.00 | 0.00 | 0.24  | 107.00   | 502981.20   | 0.45 | 16  | 9   | 7  | 66  |
| United Arab Emirates | NA         | 1579165  | NA      | NA       | 1841828  | 51.95   | NA   | NA    | NA       | 3443051.77  | 0.96 | 7   | 5   | 4  | 12  |
| United Kingdom       | 141051980  | 77820    | 295247  | 4400820  | 31018780 | 1082.00 | NA   | NA    | NA       | 45469333.33 | 1.69 | 222 | 131 | 71 | 502 |
| United States        | 1710342895 | 2579052  | 3607866 | 58027961 | 5186685  | 938.70  | NA   | NA    | NA       | 54324900.00 | NA   | 288 | 190 | 94 | 858 |
| Uruguay              | 11369831   | 5712     | 383263  | 137912   | 7427126  | 1550.00 | NA   | NA    | NA       | 226324.97   | 0.41 | 27  | 16  | 14 | 40  |
| Uzbekistan           | NA         | 2021696  | NA      | 81600    | 10613904 | 188.80  | 0.02 | 4.38  | 1377.00  | 92090.21    | 0.19 | 7   | 4   | 6  | 11  |

|           |           |         |        |          |         |         |      |       |          |            |      |    |    |    |    |
|-----------|-----------|---------|--------|----------|---------|---------|------|-------|----------|------------|------|----|----|----|----|
| Vanuatu   | NA        | 34086   | 5559   | NA       | 258     | NA      | 0.17 | 38.76 | 105.00   | NA         | NA   | 3  | NA | 3  | 5  |
| Venezuela | 91417167  | 1057056 | 163433 | 2787338  | 600986  | 1813.00 | NA   | NA    | NA       | 2827211.88 | 0.12 | 41 | 24 | 23 | 66 |
| Vietnam   | 281951107 | NA      | 83760  | 21377435 | NA      | 1991.00 | 0.02 | 5.00  | 4724.00  | 1178742.78 | 0.44 | 53 | 27 | 25 | 85 |
| Yemen     | NA        | 9255373 | 1978   | NA       | 9551311 | 232.70  | 0.24 | 47.77 | 13178.00 | NA         | NA   | 6  | 3  | 5  | 10 |
| Zambia    | 16766820  | 636419  | 757    | 517553   | 217503  | 1065.00 | 0.26 | 53.38 | 8856.00  | NA         | 0.28 | 18 | 12 | 13 | 26 |
| Zimbabwe  | 21372428  | 3170533 | 86519  | 202234   | 362666  | 722.50  | 0.15 | 34.69 | 5602.00  | NA         | NA   | 16 | 10 | 13 | 30 |

## **List of variables that were log-transformed during analysis of this study**

### **Response variables**

1. Log (human microbe)
2. Log (zoonotic microbe)
3. Log (emerging microbe)
4. Log (total microbe)

### **Predictor variables**

1. Log (land area)
2. Log (longitude)
3. Log (number poor)
4. Log (exports percent GDP)
5. Log (imports percent GDP)
6. Log (food imports percent)
7. Log (food exports percent)
8. Log (human population density)
9. Log (mean annual temperature average)
10. Log (GDP value)
11. Log (GDP per capita)
12. Log (National income per capita)
13. Log (Health expenditure percent GDP)
14. Log (Health expenditure per capita)
15. Log (Nurses/midwives per 1000people)
16. Log (prevalence undernourished)
17. Log (surface area)
18. Log (Human population density)
19. Log (GNI Atlas)
20. Log (cattle)
21. Log (chicken)
22. Log (goat)
23. Log (horse)
24. Log (pig)
25. Log (sheep)
26. Log (poverty index)
27. Log (poverty headcount percent)
28. Log (number poor)



**Table S3· List of variables that were retained after excluding correlated variables**

| <b>Base variable</b>                | <b>Correlation reported (&gt; 0·899 or &lt; -0·899)</b>                                                                                                                                                                                                              | <b>Variable retained</b> |
|-------------------------------------|----------------------------------------------------------------------------------------------------------------------------------------------------------------------------------------------------------------------------------------------------------------------|--------------------------|
| Agriculture land (% of land area)   | --                                                                                                                                                                                                                                                                   | Yes                      |
| Log land area                       | Log surface area (0·97), Log chicken population (0·91)                                                                                                                                                                                                               | Yes                      |
| Mean annual precipitation           | Average precipitation (0·91), National rainfall index (0·91)                                                                                                                                                                                                         | No                       |
| HDI rank                            | HDI value (-0·98), Expected years schooling (-0·92), Log GDP per capita (-0·96), Log national income per capita (-0·95), Log health expenditure per capita (-0·92), Log GNI per capita Atlas (-0·96), Log poverty index (0·91), Log poverty headcount percent (0·91) | No                       |
| HDI value                           | HDI rank (-0·98), Life expectancy (0·90), Log GDP per capita (-0·96), Log national income per capita (-0·95), Log health expenditure per capita (-0·92), Log GNI per capita Atlas (-0·96), Log poverty index (0·91), Log poverty headcount percent (0·91)            | Yes                      |
| Life expectancy                     | already correlated                                                                                                                                                                                                                                                   | No                       |
| Expected years schooling            | already correlated                                                                                                                                                                                                                                                   | No                       |
| Mean years schooling                | -                                                                                                                                                                                                                                                                    | Yes                      |
| GNI minus HDI rank                  | --                                                                                                                                                                                                                                                                   | Yes                      |
| Human population                    | --                                                                                                                                                                                                                                                                   | Yes                      |
| Average population growth percent   | Birth rate per 1000 people (0·94)                                                                                                                                                                                                                                    | Yes                      |
| GDP percent growth                  | GDP per capita percent growth (0·96)                                                                                                                                                                                                                                 | Yes                      |
| GDP per capita percent growth       | already correlated                                                                                                                                                                                                                                                   | No                       |
| Latitude                            | --                                                                                                                                                                                                                                                                   | Yes                      |
| Longitude                           | --                                                                                                                                                                                                                                                                   | Yes                      |
| Buffalo population                  | --                                                                                                                                                                                                                                                                   | Yes                      |
| Duck population                     | --                                                                                                                                                                                                                                                                   | Yes                      |
| National diversity index            | --                                                                                                                                                                                                                                                                   | Yes                      |
| Log exports percent GDP             | --                                                                                                                                                                                                                                                                   | Yes                      |
| Log imports percent GDP             | Log horse population (-0·92)                                                                                                                                                                                                                                         | Yes                      |
| Log food imports percent            | --                                                                                                                                                                                                                                                                   | Yes                      |
| Log food exports percent            | --                                                                                                                                                                                                                                                                   | Yes                      |
| Average precipitation               | already correlated                                                                                                                                                                                                                                                   | No                       |
| Forest area percent                 | --                                                                                                                                                                                                                                                                   | Yes                      |
| Log human population density        | --                                                                                                                                                                                                                                                                   | Yes                      |
| Log mean annual temperature average | --                                                                                                                                                                                                                                                                   | Yes                      |
| Log GDP value                       | Log surface area (0·90), Log GNI Atlas (0·99), Log cattle population (0·90), Log chicken population (0·97), Log pig population (0·92)                                                                                                                                | No                       |
| Log GDP per capita_                 | already correlated                                                                                                                                                                                                                                                   | No                       |
| Log national income per capita      | already correlated                                                                                                                                                                                                                                                   | No                       |
| Log health expenditure percent GDP  | --                                                                                                                                                                                                                                                                   | Yes                      |
| Log health expenditure per capita   | already correlated                                                                                                                                                                                                                                                   | No                       |
| Physicians per 1000 people          | --                                                                                                                                                                                                                                                                   | Yes                      |
| Log Nurses midwives per 1000 people | --                                                                                                                                                                                                                                                                   | Yes                      |

|                                    |                    |     |
|------------------------------------|--------------------|-----|
| Log prevalence<br>undernourishment | --                 | Yes |
| Death rate per 1000 people         | --                 | Yes |
| Birth rate per 1000 people         | already correlated | No  |
| Log surface area                   | already correlated | No  |
| Log GNI Atlas                      | already correlated | No  |
| Log GNI per capita Atlas           | already correlated | No  |
| Log cattle population              | already correlated | No  |
| Log chicken population             | already correlated | No  |
| Log goat population                | --                 | Yes |
| Log horse population               | already correlated | No  |
| Log pig population                 | already correlated | No  |
| Log sheep population               | --                 | Yes |
| National rainfall index            | already correlated | Yes |
| Log poverty index                  | already correlated | No  |
| Log poverty headcount percent      | already correlated | No  |
| Log number poor                    | --                 | Yes |

---

**Table. S4. Country-specific predictor and response variables used for prediction**

| Country                   | Agri<br>land<br>perce<br>nt | Land area  | HDI<br>valu<br>e | GNI<br>minu<br>s<br>HDI<br>rank | longitu<br>de | Nation<br>al<br>diversit<br>y index | Expor<br>ts<br>percen<br>t GDP | Forest<br>area<br>perce<br>nt | Human<br>populatio<br>n density | Mean<br>annual<br>temperatu<br>re average | Health<br>expenditu<br>re percent<br>GDP | Deat<br>h<br>rate<br>per<br>1000<br>peopl<br>e | Sheep<br>population | Nation<br>al<br>rainfall<br>index |
|---------------------------|-----------------------------|------------|------------------|---------------------------------|---------------|-------------------------------------|--------------------------------|-------------------------------|---------------------------------|-------------------------------------------|------------------------------------------|------------------------------------------------|---------------------|-----------------------------------|
| Afghanistan               | 58.07                       | 652860.00  | 0.50             | 0.00                            | 69.17         | 0.46                                | 6.90                           | 2.07                          | 54.42                           | 12.92                                     | 10.30                                    | 7.00                                           | 8725266.00          | 185.00                            |
| Albania                   | 42.86                       | 27400.00   | 0.79             | 23.00                           | 19.82         | 0.53                                | 31.52                          | 28.16                         | 104.87                          | 11.27                                     | 6.80                                     | 7.00                                           | 1808803.00          | 1136.00                           |
| Algeria                   | 17.41                       | 2381741.00 | 0.75             | -5.00                           | 3.04          | 0.31                                | 24.03                          | 0.82                          | 17.35                           | 22.58                                     | 7.10                                     | 5.00                                           | 16331022.00         | 241.50                            |
| American Samoa            | 24.50                       | 200.00     | NA               | NA                              | -170.70       | NA                                  | 65.05                          | 87.70                         | 278.21                          | NA                                        | NA                                       | NA                                             | NA                  | NA                                |
| Andorra                   | 40.02                       | 470.00     | 0.86             | -18.00                          | 1.52          | NA                                  | NA                             | 34.04                         | 163.76                          | NA                                        | 12.00                                    | 4.00                                           | 2656.00             | NA                                |
| Angola                    | 47.48                       | 1246700.00 | 0.58             | -16.00                          | 13.23         | 0.64                                | 29.94                          | 46.41                         | 23.89                           | 21.51                                     | 2.90                                     | 9.00                                           | 1065019.00          | 1137.00                           |
| Anguilla                  | NA                          | NA         | NA               | NA                              | NA            | NA                                  | NA                             | NA                            | NA                              | NA                                        | NA                                       | NA                                             | NA                  | NA                                |
| Antarctica                | NA                          | NA         | NA               | NA                              | NA            | NA                                  | NA                             | NA                            | NA                              | NA                                        | NA                                       | NA                                             | NA                  | NA                                |
| Antigua<br>And<br>Barbuda | 20.45                       | 440.00     | 0.78             | -12.00                          | -61.85        | NA                                  | 41.70                          | 22.27                         | 231.85                          | NA                                        | 4.80                                     | 6.00                                           | NA                  | NA                                |
| Argentina                 | 54.34                       | 2736690.00 | 0.83             | 19.00                           | -58.40        | 0.62                                | 11.18                          | 9.91                          | 16.18                           | 14.22                                     | 6.80                                     | 8.00                                           | 11512554.00         | 1062.00                           |
| Armenia                   | 58.88                       | 28470.00   | 0.76             | 24.00                           | 44.51         | 0.56                                | 38.05                          | 11.66                         | 102.93                          | 6.37                                      | 10.10                                    | 10.00                                          | 713879.00           | 352.10                            |
| Aruba                     | 11.11                       | 180.00     | NA               | NA                              | -70.03        | NA                                  | NA                             | 2.33                          | 584.80                          | NA                                        | NA                                       | 9.00                                           | NA                  | NA                                |
| Australia                 | 47.63                       | 7682300.00 | 0.94             | 18.00                           | 149.13        | 0.85                                | 21.27                          | 16.24                         | 3.20                            | 21.51                                     | 9.40                                     | 7.00                                           | 75894699.00         | 717.10                            |
| Austria                   | 32.94                       | 82523.00   | 0.91             | 0.00                            | 16.37         | 0.47                                | 53.94                          | 46.88                         | 106.75                          | 6.19                                      | 10.30                                    | 9.00                                           | 398459.00           | 1126.00                           |
| Azerbaijan                | 57.70                       | 82663.00   | 0.76             | -7.00                           | 49.89         | 0.53                                | 48.69                          | 13.78                         | 119.31                          | 12.22                                     | 6.70                                     | 6.00                                           | 7987313.00          | 459.70                            |

|                                   |       |            |      |        |        |      |       |       |         |       |       |       |             |         |
|-----------------------------------|-------|------------|------|--------|--------|------|-------|-------|---------|-------|-------|-------|-------------|---------|
| Bahamas                           | 1.40  | 10010.00   | 0.81 | -10.00 | -77.34 | 0.44 | 33.65 | 51.45 | 39.50   | 25.06 | 7.40  | 6.00  | NA          | 1320.00 |
| Bahrain                           | 11.15 | 771.00     | 0.85 | -19.00 | 50.58  | NA   | 73.97 | 0.78  | 1935.91 | NA    | 5.20  | 2.00  | NA          | NA      |
| Bangladesh                        | 70.63 | 130170.00  | 0.61 | 9.00   | 90.41  | 0.54 | 15.04 | 10.98 | 1265.04 | 25.47 | 2.60  | 5.00  | 1291451.00  | 2309.00 |
| Barbados                          | 32.56 | 430.00     | 0.80 | 14.00  | -59.62 | NA   | 37.00 | 14.65 | 664.46  | NA    | 7.50  | 11.00 | NA          | NA      |
| Belarus                           | 42.29 | 202910.00  | 0.81 | 18.00  | 27.57  | 0.37 | 66.60 | 42.55 | 46.86   | 6.29  | 6.10  | 13.00 | 51830.00    | 615.70  |
| Belgium                           | 43.86 | 30280.00   | 0.92 | 6.00   | 4.35   | 0.45 | 85.05 | 22.57 | 375.56  | 9.51  | 10.50 | 10.00 | 99697.00    | 1070.00 |
| Belize                            | 7.01  | 22810.00   | 0.71 | 14.00  | -88.77 | 0.64 | 52.01 | 59.90 | 16.43   | 25.06 | 6.20  | 5.00  | 12712.00    | 2013.00 |
| Benin                             | 33.26 | 112760.00  | 0.52 | 2.00   | 2.42   | 0.62 | 30.93 | 38.23 | 99.11   | 27.46 | 4.00  | 9.00  | 860000.00   | 959.50  |
| Bhutan                            | 13.79 | 38117.00   | 0.61 | -21.00 | 89.64  | 0.61 | 26.04 | 72.28 | 21.19   | 8.58  | 3.50  | 6.00  | 9756.00     | 2609.00 |
| Bolivia                           | 34.81 | 1083300.00 | 0.69 | NA     | -68.15 | 0.72 | 24.90 | 50.55 | 10.20   | 20.98 | 6.40  | 7.00  | 6267743.00  | 1503.00 |
| Bonaire, Saint Eustatius And Saba | NA    | NA         | NA   | NA     | NA     | NA   | NA    | NA    | NA      | NA    | NA    | NA    | NA          | NA      |
| Bosnia And Herzegovina            | 42.64 | 51200.00   | 0.77 | 16.00  | 18.36  | 0.53 | 35.97 | 42.68 | 68.50   | 9.02  | 9.40  | 11.00 | 1054689.00  | 1019.00 |
| Botswana                          | 45.88 | 566730.00  | 0.72 | -26.00 | 25.91  | 0.46 | 55.11 | 19.13 | 4.04    | 21.48 | 6.00  | 7.00  | 227247.00   | 430.40  |
| Brazil                            | 33.81 | 8358140.00 | 0.76 | 2.00   | -47.93 | 0.88 | 12.57 | 59.05 | 25.04   | 24.92 | 8.90  | 6.00  | 16797594.00 | 1934.00 |
| British Virgin Islands            | 46.67 | 150.00     | NA   | NA     | -64.62 | NA   | NA    | 24.13 | 207.97  | NA    | NA    | NA    | NA          | NA      |

|                          |       |            |      |        |         |      |       |       |        |       |       |       |              |         |
|--------------------------|-------|------------|------|--------|---------|------|-------|-------|--------|-------|-------|-------|--------------|---------|
| Brunei                   | 2.73  | 5270.00    | 0.85 | -35.00 | 114.95  | 0.78 | 49.57 | 72.11 | 81.35  | 25.93 | 2.60  | 4.00  | NA           | 3564.00 |
| Bulgaria                 | 46.17 | 108560.00  | 0.81 | 13.00  | 23.32   | 0.49 | 66.33 | 35.22 | 65.18  | 10.40 | 8.20  | 15.00 | 1528752.00   | 543.30  |
| Burkina Faso             | 44.23 | 273600.00  | 0.42 | -7.00  | -1.54   | 0.53 | 28.45 | 19.55 | 70.15  | 28.18 | 5.40  | 9.00  | 7770083.00   | 759.00  |
| Burundi                  | 79.13 | 25680.00   | 0.42 | 4.00   | 29.36   | 0.68 | 6.24  | 10.75 | 423.06 | 20.27 | 8.20  | 11.00 | 218905.00    | 997.80  |
| Cambodia                 | 30.90 | 176520.00  | 0.58 | 3.00   | 104.92  | 0.57 | 60.73 | 53.57 | 90.67  | 26.94 | 6.00  | 6.00  | 13207.00     | 2348.00 |
| Cameroon                 | 20.63 | 472710.00  | 0.56 | 2.00   | 11.52   | 0.69 | 16.96 | 39.80 | 50.88  | 24.53 | 5.10  | 10.00 | 346584.00    | 1694.00 |
| Canada                   | 6.89  | 9093510.00 | 0.93 | 10.00  | -75.70  | 0.30 | 30.89 | 38.17 | 4.04   | -7.14 | 10.40 | 8.00  | 933430.00    | 693.60  |
| Cape Verde               | 19.60 | 4030.00    | 0.65 | 2.00   | -23.51  | NA   | 39.13 | 22.31 | 135.58 | NA    | 4.80  | 6.00  | 10400.00     | 144.00  |
| Cayman Islands           | 11.25 | 240.00     | NA   | NA     | -81.37  | NA   | NA    | 52.92 | 256.50 | NA    | NA    | NA    | NA           | NA      |
| Central African Republic | 8.15  | 622980.00  | 0.37 | 3.00   | 18.55   | 0.51 | 12.52 | 35.59 | 7.48   | 24.84 | 4.80  | 14.00 | 133620.00    | 1331.00 |
| Chad                     | 39.66 | 1259200.00 | 0.40 | -15.00 | 15.04   | 0.36 | 33.85 | 3.87  | 11.83  | 26.65 | 4.60  | 13.00 | 6287562.00   | 648.20  |
| Chile                    | 21.23 | 743532.00  | 0.84 | 13.00  | -70.65  | 0.57 | 28.70 | 23.85 | 24.28  | 8.37  | 8.10  | 6.00  | 3888485.00   | 2483.00 |
| China                    | 56.22 | 9388211.00 | 0.75 | -9.00  | 116.40  | 0.84 | 19.76 | 22.19 | 147.67 | 6.33  | 5.30  | 7.00  | 173900001.00 | 1049.00 |
| Colombia                 | 40.26 | 1109500.00 | 0.75 | -4.00  | -74.08  | 0.94 | 14.77 | 52.73 | 44.22  | 24.40 | 6.20  | 6.00  | 1318241.00   | 2862.00 |
| Comoros                  | 71.47 | 1861.00    | 0.50 | 15.00  | 43.26   | NA   | 17.70 | 19.88 | 437.35 | 23.99 | 8.00  | 7.00  | 19200.00     | 2304.00 |
| Cook Islands             | NA    | NA         | NA   | NA     | -159.76 | NA   | NA    | NA    | NA     | NA    | NA    | NA    | NA           | NA      |
| Costa Rica               | 35.47 | 51060.00   | 0.79 | 15.00  | -84.08  | 0.82 | 34.15 | 53.98 | 96.08  | 23.85 | 8.10  | 5.00  | 35800.00     | 2865.00 |
| Croatia                  | 27.48 | 55960.00   | 0.83 | 10.00  | 15.98   | 0.54 | 51.26 | 34.35 | 73.73  | 10.47 | 7.40  | 12.00 | 750877.00    | 824.20  |
| Cuba                     | 59.99 | 104020.00  | 0.78 | 43.00  | -82.38  | 0.70 | 17.15 | 30.76 | 110.41 | 25.13 | NA    | 8.00  | 1008338.00   | 1103.00 |

|                                  |       |            |      |        |        |      |       |       |        |       |       |       |             |         |
|----------------------------------|-------|------------|------|--------|--------|------|-------|-------|--------|-------|-------|-------|-------------|---------|
| Curacao                          | NA    | 444.00     | NA   | NA     | -68.93 | NA   | NA    | NA    | 362.64 | NA    | NA    | 9.00  | NA          | NA      |
| Cyprus                           | 13.77 | 9240.00    | 0.87 | 4.00   | 33.37  | 0.45 | 63.82 | 18.69 | 127.66 | 18.71 | 6.80  | 7.00  | 267490.00   | 344.30  |
| Czech Republic                   | 54.56 | 77210.00   | 0.89 | NA     | 14.42  | 0.50 | 79.45 | 34.54 | 137.18 | 7.67  | 7.30  | 10.00 | 183826.00   | 707.10  |
| Democratic Republic Of The Congo | 11.56 | 2267050.00 | 0.46 | 12.00  | 15.31  | 0.65 | 35.60 | 67.30 | 35.88  | 24.04 | 4.30  | 10.00 | 814107.00   | 1571.00 |
| Denmark                          | 62.18 | 42262.00   | 0.93 | 3.00   | 12.57  | 0.40 | 55.21 | 14.58 | 136.52 | 7.82  | 10.30 | 9.00  | 159626.00   | 694.00  |
| Djibouti                         | 73.43 | 23180.00   | 0.48 | -21.00 | 43.14  | 0.43 | 34.23 | 0.24  | 41.28  | 27.64 | 4.40  | 8.00  | NA          | 107.40  |
| Dominica                         | 33.33 | 750.00     | 0.72 | 6.00   | -61.39 | NA   | 44.21 | 57.77 | 98.57  | NA    | 5.40  | NA    | NA          | NA      |
| Dominican Republic               | 48.69 | 48310.00   | 0.74 | -15.00 | -69.90 | 0.66 | 24.83 | 41.05 | 222.87 | 23.93 | 6.20  | 6.00  | NA          | 820.90  |
| East Timor                       | 25.55 | 14870.00   | 0.63 | -10.00 | 125.57 | NA   | 2.28  | 46.13 | 87.18  | 24.97 | 3.10  | 6.00  | NA          | NA      |
| Ecuador                          | 23.31 | 248360.00  | 0.75 | 15.00  | -78.52 | 0.87 | 20.76 | 50.52 | 66.94  | 21.33 | 8.50  | 5.00  | 1127222.00  | 2575.00 |
| Egypt                            | 3.84  | 995450.00  | 0.70 | -15.00 | 31.24  | 0.33 | 16.30 | 0.07  | 98.00  | 22.12 | 4.20  | 6.00  | 5365065.00  | 106.60  |
| El Salvador                      | 77.32 | 20720.00   | 0.67 | 0.00   | -89.19 | 0.62 | 27.64 | 12.79 | 307.81 | 24.77 | 6.90  | 7.00  | 11475.00    | 1434.00 |
| Equatorial Guinea                | 10.12 | 28050.00   | 0.59 | -80.00 | 8.78   | 0.71 | 56.53 | 55.90 | 45.19  | 24.13 | 2.70  | 10.00 | NA          | 2447.00 |
| Eritrea                          | 75.17 | 101000.00  | 0.44 | -9.00  | 38.93  | 0.59 | NA    | 14.95 | 44.30  | 26.07 | 3.30  | 7.00  | 2128845.00  | 333.00  |
| Estonia                          | 23.44 | 42390.00   | 0.87 | 10.00  | 24.75  | 0.44 | 78.03 | 52.65 | 31.03  | 5.03  | 6.50  | 12.00 | 87140.00    | 621.40  |
| Ethiopia                         | 36.26 | 1000000.00 | 0.46 | -1.00  | 38.75  | 0.59 | 7.74  | 12.50 | 104.96 | 22.37 | 4.00  | 7.00  | 22511719.00 | 1073.00 |
| Falkland Islands                 | NA    | NA         | NA   | NA     | -57.85 | NA   | NA    | NA    | NA     | 5.79  | NA    | NA    | 681763.00   | NA      |
| Faroe Islands                    | 2.15  | 1396.00    | NA   | NA     | -6.77  | NA   | NA    | 0.06  | 35.31  | NA    | NA    | 8.00  | NA          | NA      |

|                     |       |           |      |                |         |      |       |       |        |       |       |       |            |             |
|---------------------|-------|-----------|------|----------------|---------|------|-------|-------|--------|-------|-------|-------|------------|-------------|
| Fiji                | 23.26 | 18270.00  | 0.74 | 18.0<br>0      | 178.44  | 0.52 | 26.41 | 55.68 | 49.56  | 23.37 | 3.60  | 7.00  | 14068.00   | 2376.0<br>0 |
| Finland             | 7.48  | 303890.00 | 0.92 | 10.0<br>0      | 24.94   | 0.29 | 38.59 | 73.11 | 18.14  | 1.35  | 9.40  | 10.00 | 126309.00  | 518.30      |
| France              | 52.46 | 547557.00 | 0.90 | 2.00           | 2.35    | 0.42 | 30.88 | 31.03 | 122.58 | 10.54 | 11.10 | 9.00  | 7458190.00 | 818.00      |
| French<br>Guiana    | NA    | NA        | NA   | NA             | -52.33  | NA   | NA    | NA    | NA     | 25.62 | NA    | NA    | 714.00     | NA          |
| French<br>Polynesia | 12.43 | 3660.00   | NA   | NA             | -149.57 | NA   | NA    | 42.35 | 77.32  | NA    | NA    | 5.00  | NA         | NA          |
| Gabon               | 20.03 | 257670.00 | 0.70 | -<br>40.0<br>0 | 9.45    | 0.64 | 43.74 | 89.26 | 7.86   | 25.00 | 2.70  | 8.00  | 195002.00  | 1842.0<br>0 |
| Gambia              | 59.78 | 10120.00  | 0.46 | 4.00           | -16.68  | 0.60 | 20.81 | 48.22 | 207.57 | 26.77 | 6.70  | 8.00  | 129232.00  | 598.40      |
| Georgia             | 36.67 | 69490.00  | 0.78 | 35.0<br>0      | 44.83   | 0.55 | 50.41 | 40.62 | 65.03  | 7.36  | 7.90  | 13.00 | 648715.00  | 1140.0<br>0 |
| Germany             | 47.96 | 348900.00 | 0.94 | 13.0<br>0      | 13.41   | 0.37 | 47.24 | 32.73 | 237.02 | 8.50  | 11.20 | 11.00 | 2129250.00 | 835.50      |
| Ghana               | 69.00 | 227540.00 | 0.59 | 3.00           | -0.20   | 0.65 | 39.92 | 41.03 | 126.72 | 27.25 | 5.90  | 8.00  | 4003190.00 | 1112.0<br>0 |
| Greece              | 60.38 | 128900.00 | 0.87 | 20.0<br>0      | 23.75   | 0.55 | 33.22 | 31.45 | 83.48  | 13.66 | 8.40  | 11.00 | 8686117.00 | 597.80      |
| Greenland           | 0.57  | 410450.00 | NA   | NA             | -51.72  | NA   | 38.98 | 0.00  | 0.14   | NA    | NA    | 9.00  | NA         | NA          |
| Grenada             | 23.53 | 340.00    | 0.77 | 12.0<br>0      | -61.75  | NA   | 56.10 | 49.97 | 317.13 | NA    | 5.00  | 7.00  | NA         | NA          |
| Guadeloupe          | NA    | NA        | NA   | NA             | -61.73  | NA   | NA    | NA    | NA     | 25.02 | NA    | NA    | 547.00     | NA          |
| Guam                | 33.33 | 540.00    | NA   | NA             | 144.75  | NA   | 19.40 | 46.30 | 304.13 | NA    | NA    | 5.00  | NA         | NA          |
| Guatemala           | 35.40 | 107160.00 | 0.65 | -8.00          | -90.53  | 0.74 | 18.80 | 33.03 | 157.83 | 23.07 | 5.70  | 5.00  | 340682.00  | 2216.0<br>0 |
| Guinea              | 59.01 | 245720.00 | 0.46 | -<br>11.0<br>0 | -13.65  | 0.60 | 42.95 | 25.90 | 51.75  | 25.55 | 4.50  | 9.00  | 942368.00  | 1638.0<br>0 |
| Guinea-<br>Bissau   | 57.97 | 28120.00  | 0.46 | 0.00           | -15.60  | 0.59 | 27.36 | 70.13 | 66.19  | 26.61 | 6.90  | 11.00 | 314501.00  | 1223.0<br>0 |
| Guyana              | 8.53  | 196850.00 | 0.65 | -8.00          | -58.16  | 0.69 | 43.70 | 83.95 | 3.95   | 25.80 | 4.50  | 8.00  | NA         | 2177.0<br>0 |
| Haiti               | 66.76 | 27560.00  | 0.50 | 6.00           | -72.34  | 0.68 | 18.84 | 3.52  | 398.45 | 24.48 | 6.90  | 9.00  | 359390.00  | 1226.0<br>0 |
| Honduras            | 28.91 | 111890.00 | 0.62 | 8.00           | -87.21  | 0.65 | 43.56 | 41.04 | 82.81  | 23.39 | 7.60  | 5.00  | NA         | 1618.0<br>0 |

|             |       |           |      |       |        |      |        |       |         |       |       |       |            |        |
|-------------|-------|-----------|------|-------|--------|------|--------|-------|---------|-------|-------|-------|------------|--------|
| Hong Kong   | 4.86  | 1050.00   | 0.93 | NA    | 114.19 | NA   | 188.00 | NA    | 7039.71 | NA    | NA    | 6.00  | NA         | NA     |
| Hungary     | 59.06 | 90530.00  | 0.84 | 3.00  | 19.04  | 0.44 | 90.09  | 22.85 | 108.04  | 10.06 | 7.20  | 13.00 | 1239000.00 | 587.50 |
| Iceland     | 18.67 | 100250.00 | 0.94 | 13.0  | -21.90 | 0.11 | 46.96  | 0.49  | 3.40    | 1.35  | 8.60  | 7.00  | 469429.00  | 923.40 |
| India       | 60.45 | 2973190.0 | 0.64 | -5.00 | 77.22  | 0.73 | 18.87  | 23.77 | 450.42  | 23.95 | 3.90  | 7.00  | 82826222.0 | 1502.0 |
| Indonesia   | 31.46 | 1811570.0 | 0.69 | -     | 106.84 | 1.00 | 20.37  | 50.24 | 145.73  | 25.72 | 3.30  | 7.00  | 3781797.00 | 2929.0 |
| Iran        | 28.21 | 1628760.0 | 0.80 | 3.00  | 51.42  | 0.47 | 23.79  | 6.56  | 49.83   | 16.93 | 7.60  | 5.00  | 50214615.0 | 207.10 |
| Iraq        | 21.34 | 434320.00 | 0.69 | -     | 44.40  | 0.43 | 37.63  | 1.90  | 88.13   | 21.58 | 3.40  | 5.00  | 7722375.00 | 225.00 |
| Ireland     | 64.31 | 68890.00  | 0.94 | 8.00  | -6.25  | 0.28 | 120.01 | 10.95 | 69.87   | 9.11  | 7.80  | 6.00  | 6339633.00 | 1202.0 |
| Isle Of Man | 70.88 | 570.00    | NA   | NA    | -4.48  | NA   | NA     | 6.07  | 147.87  | NA    | NA    | NA    | NA         | NA     |
| Israel      | 24.67 | 21640.00  | 0.90 | 13.0  | 35.22  | 0.60 | 30.27  | 7.62  | 402.61  | 19.70 | 7.40  | 5.00  | 305603.00  | 391.60 |
| Italy       | 44.01 | 294140.00 | 0.88 | 3.00  | 12.48  | 0.51 | 31.30  | 31.61 | 205.86  | 11.50 | 9.00  | 10.00 | 6218034.00 | 830.20 |
| Ivory Coast | 64.78 | 318000.00 | 0.49 | -     | -4.03  | 0.63 | 29.18  | 32.71 | 76.40   | 26.30 | 5.40  | 12.00 | 901115.00  | 1187.0 |
| Jamaica     | 41.00 | 10830.00  | 0.73 | 17.0  | -76.79 | 0.67 | 31.55  | 30.95 | 266.88  | 24.47 | 5.90  | 7.00  | 11058.00   | 1328.0 |
| Japan       | 12.33 | 364560.00 | 0.91 | 9.00  | 139.69 | 0.64 | 16.12  | 68.46 | 347.78  | 10.36 | 10.90 | 11.00 | 16096.00   | 1578.0 |
| Jordan      | 11.90 | 88780.00  | 0.74 | 16.0  | 35.95  | 0.47 | 35.58  | 1.10  | 109.29  | 18.35 | 6.30  | 4.00  | 2495776.00 | 148.80 |
| Kazakhstan  | 80.38 | 2699700.0 | 0.80 | -3.00 | 71.45  | 0.44 | 31.84  | 1.23  | 6.68    | 5.99  | 3.90  | 7.00  | 14811972.0 | 274.50 |
| Kenya       | 48.55 | 569140.00 | 0.59 | 16.0  | 36.82  | 0.64 | 13.93  | 7.75  | 87.32   | 24.50 | 5.20  | 6.00  | 17129606.0 | 902.10 |
| Kiribati    | 41.98 | 810.00    | 0.61 | 22.0  | 172.98 | NA   | 9.92   | 15.00 | 143.70  | NA    | 7.60  | 7.00  | NA         | NA     |
| Kuwait      | 8.38  | 17820.00  | 0.80 | -     | 47.98  | 0.22 | 48.23  | 0.35  | 232.13  | 25.15 | 4.00  | 3.00  | 628041.00  | 67.35  |



|               |       |                |      |                |        |      |        |       |          |       |       |       |            |             |
|---------------|-------|----------------|------|----------------|--------|------|--------|-------|----------|-------|-------|-------|------------|-------------|
| Kyrgyzstan    | 55.04 | 191800.00      | 0.67 | 32.0<br>0      | NA     | 0.41 | 35.42  | 3.32  | 32.33    | 1.09  | 8.20  | 6.00  | 3047736.00 | 372.50      |
| Laos          | 10.26 | 230800.00      | 0.60 | -<br>13.0<br>0 | 102.60 | 0.62 | 34.34  | 81.29 | 29.71    | 23.22 | 2.80  | 7.00  | 20316.00   | 1933.0<br>0 |
| Latvia        | 30.31 | 62180.00       | 0.85 | 8.00           | 24.11  | 0.42 | 60.47  | 53.97 | 31.21    | 5.63  | 5.80  | 15.00 | 81436.00   | 605.40      |
| Lebanon       | 64.32 | 10230.00       | 0.76 | 3.00           | 35.48  | 0.57 | 23.60  | 13.42 | 594.56   | 15.61 | 7.40  | 5.00  | 265344.00  | 557.50      |
| Lesotho       | 75.01 | 30360.00       | 0.52 | -4.00          | 27.48  | 0.42 | 42.25  | 1.61  | 73.56    | 11.97 | 8.40  | 13.00 | 1346597.00 | 734.90      |
| Liberia       | 28.03 | 96320.00       | 0.44 | 9.00           | -10.80 | 0.56 | 21.42  | 43.39 | 49.13    | 25.25 | 15.20 | 8.00  | 48450.00   | 2413.0<br>0 |
| Libya         | 8.72  | 1759540.0<br>0 | 0.71 | -<br>12.0<br>0 | 13.19  | 0.24 | 38.01  | 0.12  | 3.62     | 21.90 | NA    | 5.00  | 5030673.00 | 140.60      |
| Liechtenstein | 32.25 | 160.00         | 0.92 | -<br>15.0<br>0 | 9.52   | NA   | NA     | 43.13 | 237.01   | NA    | NA    | 7.00  | 3963.00    | NA          |
| Lithuania     | 47.98 | 62650.00       | 0.86 | 7.00           | 25.28  | NA   | 81.31  | 34.80 | 45.14    | 6.24  | 6.50  | 14.00 | 52843.00   | 585.40      |
| Luxembourg    | 50.68 | 2590.00        | 0.90 | -<br>13.0<br>0 | 6.13   | NA   | 230.02 | 33.47 | 231.45   | 8.88  | 6.00  | 7.00  | 8064.00    | NA          |
| Macao         | NA    | 30.30          | NA   | NA             | 113.55 | NA   | 79.40  | NA    | 20546.77 | NA    | NA    | 4.00  | NA         | NA          |
| Macedonia     | 50.08 | 25220.00       | 0.76 | 9.00           | 21.43  | 0.55 | 55.11  | 39.57 | 82.60    | 9.85  | 6.10  | 10.00 | 749341.00  | 621.50      |
| Madagascar    | 71.18 | 581800.00      | 0.52 | 20.0<br>0      | 47.54  | 0.81 | 35.42  | 21.44 | 43.95    | 22.01 | 5.20  | 6.00  | 695228.00  | 1541.0<br>0 |
| Malawi        | 61.41 | 94280.00       | 0.48 | 14.0<br>0      | 33.79  | 0.63 | 29.16  | 33.38 | 197.52   | 21.98 | 9.30  | 7.00  | 76610.00   | 1125.0<br>0 |
| Malaysia      | 23.86 | 328550.00      | 0.80 | -<br>11.0<br>0 | 101.69 | 0.81 | 71.47  | 67.55 | 96.25    | 25.14 | 4.00  | 5.00  | 131923.00  | 3194.0<br>0 |
| Maldives      | 26.33 | 300.00         | 0.72 | -<br>19.0<br>0 | 73.51  | NA   | 72.81  | 3.33  | 1454.43  | NA    | 11.50 | 3.00  | NA         | NA          |
| Mali          | 33.77 | 1220190.0<br>0 | 0.43 | -<br>16.0<br>0 | -8.00  | 0.38 | 22.08  | 3.86  | 15.20    | 28.30 | 5.80  | 10.00 | 8239797.00 | 577.60      |
| Malta         | 31.97 | 320.00         | 0.88 | 3.00           | 14.51  | NA   | 136.11 | 1.09  | 1454.04  | NA    | 9.60  | 8.00  | 11873.00   | NA          |
| Martinique    | NA    | NA             | NA   | NA             | -61.07 | NA   | NA     | NA    | NA       | NA    | NA    | NA    | 3986.00    | NA          |

|               |       |            |      |        |         |      |       |       |        |       |       |       |             |         |
|---------------|-------|------------|------|--------|---------|------|-------|-------|--------|-------|-------|-------|-------------|---------|
| Mauritania    | 38.53 | 1030700.00 | 0.52 | -13.00 | -15.98  | 0.34 | 43.18 | 0.22  | 4.29   | 27.69 | 4.60  | 8.00  | 1236549.00  | 190.30  |
| Mauritius     | 41.87 | 2030.00    | 0.79 | -6.00  | 57.50   | NA   | 42.07 | 19.01 | 622.96 | 23.13 | 5.50  | 8.00  | 2177.00     | NA      |
| Mayotte       | NA    | NA         | NA   | NA     | 45.23   | NA   | NA    | NA    | NA     | NA    | NA    | NA    | 1100.00     | NA      |
| Mexico        | 54.89 | 1943950.00 | 0.77 | -6.00  | -99.14  | 0.93 | 37.88 | 33.97 | 66.44  | 20.54 | 5.90  | 5.00  | 7306600.00  | 1052.00 |
| Micronesia    | 31.43 | 700.00     | 0.63 | 13.00  | 158.16  | NA   | 26.62 | 91.81 | 150.78 | NA    | 13.10 | 6.00  | NA          | NA      |
| Moldova       | 74.81 | 32870.00   | 0.70 | NA     | 28.86   | 0.45 | 42.54 | 12.44 | 123.65 | 9.67  | 10.20 | 11.00 | 692160.00   | 541.30  |
| Mongolia      | 72.67 | 1553560.00 | 0.74 | 11.00  | 106.88  | NA   | 59.47 | 8.08  | 1.98   | -0.50 | 3.90  | 6.00  | 18119414.00 | 177.50  |
| Montserrat    | NA    | NA         | NA   | NA     | -62.21  | NA   | NA    | NA    | NA     | NA    | NA    | NA    | NA          | NA      |
| Morocco       | 68.54 | 446300.00  | 0.67 | -5.00  | -6.83   | 0.46 | 36.78 | 12.62 | 80.08  | 17.23 | 5.50  | 5.00  | 16114000.00 | 287.90  |
| Mozambique    | 63.52 | 786380.00  | 0.44 | 4.00   | 32.59   | 0.52 | 38.27 | 48.25 | 37.73  | 23.69 | 5.40  | 10.00 | 347933.00   | 1005.00 |
| Myanmar       | 19.50 | 653080.00  | 0.58 | -15.00 | 96.13   | 0.63 | 17.09 | 44.47 | 81.72  | 22.96 | 4.90  | 8.00  | 767033.00   | 2329.00 |
| Namibia       | 47.14 | 823290.00  | 0.65 | -25.00 | 17.08   | 0.55 | 36.68 | 8.40  | 3.08   | 20.04 | 8.90  | 7.00  | 2693149.00  | 339.00  |
| Nepal         | 28.75 | 143350.00  | 0.57 | 12.00  | 85.32   | 0.64 | 9.76  | 25.36 | 204.43 | 12.74 | 6.10  | 6.00  | 600010.00   | 1751.00 |
| Netherlands   | 54.53 | 33690.00   | 0.93 | 5.00   | 4.30    | 0.41 | 86.46 | 11.16 | 508.54 | 9.20  | 10.70 | 9.00  | 1129500.00  | 893.10  |
| New Caledonia | 10.08 | 18280.00   | NA   | NA     | 166.46  | NA   | NA    | 45.90 | 15.34  | 21.96 | NA    | 6.00  | 1152.00     | NA      |
| New Zealand   | 42.22 | 263310.00  | 0.92 | 18.00  | 174.78  | 0.52 | 25.82 | 38.56 | 18.21  | 9.98  | 9.30  | 7.00  | 31226422.00 | 1154.00 |
| Nicaragua     | 42.09 | 120340.00  | 0.66 | 14.00  | -86.25  | 0.64 | 41.23 | 25.88 | 51.67  | 24.59 | 7.80  | 5.00  | 105610.00   | 2013.00 |
| Niger         | 36.06 | 1266700.00 | 0.35 | -2.00  | 2.11    | 0.41 | 16.62 | 0.90  | 16.96  | 27.24 | 7.20  | 10.00 | 9192020.00  | 310.40  |
| Nigeria       | 77.74 | 910770.00  | 0.53 | -20.00 | 7.49    | 0.55 | 9.22  | 7.68  | 209.59 | 26.78 | 3.60  | 12.00 | 37440022.00 | 1295.00 |
| Niue          | NA    | NA         | NA   | NA     | -169.92 | NA   | NA    | NA    | NA     | NA    | NA    | NA    | NA          | NA      |

|                          |       |            |      |        |        |      |       |       |        |       |       |       |             |         |
|--------------------------|-------|------------|------|--------|--------|------|-------|-------|--------|-------|-------|-------|-------------|---------|
| North Korea              | 21.84 | 120410.00  | NA   | NA     | 125.75 | 0.37 | NA    | 41.78 | 211.70 | 4.86  | NA    | 9.00  | NA          | NA      |
| Northern Mariana Islands | 6.52  | 460.00     | NA   | NA     | 145.75 | NA   | 73.59 | 64.13 | 119.88 | NA    | NA    | NA    | NA          | NA      |
| Norway                   | 2.70  | 365245.00  | 0.95 | 5.00   | 10.75  | 0.30 | 35.47 | 33.16 | 14.46  | 0.75  | 10.00 | 8.00  | 2300464.00  | 1414.00 |
| Oman                     | 4.75  | 309500.00  | 0.82 | -19.00 | 58.59  | 0.36 | 41.22 | 0.01  | 14.98  | 25.45 | 3.80  | 3.00  | 388590.00   | 23.44   |
| Pakistan                 | 47.03 | 770880.00  | 0.56 | -14.00 | 73.06  | 0.50 | 8.24  | 1.91  | 255.57 | 19.98 | 2.70  | 7.00  | 15025659.00 | 355.60  |
| Palau                    | 10.87 | 460.00     | 0.80 | 28.00  | 134.48 | NA   | 50.24 | 87.61 | 47.24  | NA    | 10.60 | 10.00 | NA          | NA      |
| Palestinian Territory    | NA    | NA         | 0.69 | 21.00  | 35.20  | NA   | NA    | NA    | NA     | NA    | NA    | NA    | NA          | NA      |
| Panama                   | 30.36 | 74340.00   | 0.79 | -4.00  | -79.52 | 0.79 | 41.38 | 62.11 | 55.13  | 24.72 | 7.00  | 5.00  | 18665.00    | 2461.00 |
| Papua New Guinea         | 2.63  | 452860.00  | 0.54 | -3.00  | 147.18 | 0.78 | NA    | 74.10 | 18.22  | 25.05 | 3.80  | 7.00  | NA          | 3250.00 |
| Paraguay                 | 55.08 | 397300.00  | 0.70 | -2.00  | -57.64 | 0.61 | 41.80 | 38.57 | 17.14  | 23.48 | 7.80  | 6.00  | 364514.00   | 1228.00 |
| Peru                     | 19.01 | 1280000.00 | 0.75 | 3.00   | -77.03 | 0.84 | 24.26 | 57.79 | 25.13  | 19.46 | 5.30  | 6.00  | 9522592.00  | 2229.00 |
| Philippines              | 41.72 | 298170.00  | 0.70 | -7.00  | 120.98 | 0.79 | 30.55 | 26.96 | 351.87 | 25.33 | 4.40  | 7.00  | 48821.00    | 2640.00 |
| Poland                   | 46.93 | 306190.00  | 0.87 | 12.00  | 21.01  | 0.37 | 53.39 | 30.81 | 124.03 | 7.87  | 6.30  | 10.00 | 218400.00   | 600.90  |
| Portugal                 | 40.39 | 91605.00   | 0.85 | 2.00   | -9.14  | 0.51 | 43.11 | 34.74 | 112.37 | 14.97 | 9.00  | 11.00 | 2211173.00  | 920.70  |
| Puerto Rico              | 22.29 | 8870.00    | NA   | NA     | -66.11 | NA   | 68.41 | 55.91 | 376.23 | 24.28 | NA    | 8.00  | 10759.00    | 1093.00 |
| Qatar                    | 5.65  | 11610.00   | 0.86 | -36.00 | 51.52  | 0.19 | 47.49 | 0.00  | 227.32 | 26.92 | 3.10  | 2.00  | 448477.00   | 36.00   |
| Republic Of The Congo    | 31.12 | 341500.00  | 0.61 | -5.00  | 15.28  | 0.65 | 79.76 | 65.40 | 15.40  | 24.52 | 3.40  | 7.00  | 7106.00     | 1653.00 |
| Reunion                  | NA    | NA         | NA   | NA     | 55.45  | NA   | NA    | NA    | NA     | 21.08 | NA    | NA    | 2122.00     | NA      |

|                                  |       |             |      |        |         |      |        |       |         |       |       |       |             |         |
|----------------------------------|-------|-------------|------|--------|---------|------|--------|-------|---------|-------|-------|-------|-------------|---------|
| Romania                          | 60.13 | 230080.00   | 0.81 | 2.00   | 26.10   | 0.42 | 41.44  | 29.82 | 85.13   | 8.81  | 5.00  | 13.00 | 9518225.00  | 647.40  |
| Russia                           | 13.29 | 16376870.00 | 0.82 | 3.00   | 37.62   | 0.45 | 26.04  | 49.76 | 8.82    | -6.32 | 5.60  | 13.00 | 19937700.00 | 489.30  |
| Rwanda                           | 73.44 | 24670.00    | 0.52 | 11.00  | 30.06   | 0.73 | 18.24  | 19.46 | 494.87  | 19.01 | 7.90  | 6.00  | 630842.00   | 1052.00 |
| Saint Helena                     | NA    | NA          | NA   | NA     | -5.72   | NA   | NA     | NA    | NA      | NA    | NA    | NA    | 651.00      | NA      |
| Saint Kitts And Nevis            | 23.08 | 260.00      | 0.78 | -19.00 | -62.73  | NA   | 56.99  | 42.31 | 212.87  | NA    | 5.60  | NA    | NA          | NA      |
| Saint Lucia                      | 17.38 | 610.00      | 0.75 | 4.00   | -60.99  | NA   | NA     | 33.28 | 293.19  | NA    | 6.00  | 8.00  | 7736.00     | NA      |
| Saint Martin                     | NA    | 54.40       | NA   | NA     | NA      | NA   | NA     | 18.38 | 590.53  | NA    | NA    | 4.00  | NA          | NA      |
| Saint Martin                     | NA    | 34.00       | NA   | NA     | -63.05  | NA   | NA     | NA    | 1209.09 | NA    | NA    | NA    | NA          | NA      |
| Saint Vincent And The Grenadines | 25.64 | 390.00      | 0.72 | 0.00   | -61.22  | NA   | 34.52  | 69.23 | 281.79  | 26.82 | 4.20  | 7.00  | NA          | NA      |
| Samoa                            | 12.37 | 2830.00     | 0.71 | 24.00  | -171.77 | NA   | 29.34  | 60.42 | 69.41   | NA    | 5.60  | 5.00  | 249.00      | NA      |
| Sao Tome And Principe            | 50.73 | 960.00      | 0.59 | 16.00  | 6.73    | NA   | NA     | 55.83 | 212.84  | NA    | 9.80  | 7.00  | NA          | NA      |
| Saudi Arabia                     | 80.78 | 2149690.00  | 0.85 | -26.00 | 46.71   | 0.28 | 33.54  | 0.45  | 15.32   | 24.65 | 5.80  | 4.00  | 6249904.00  | 128.60  |
| Senegal                          | 46.06 | 192530.00   | 0.51 | -2.00  | -17.44  | 0.51 | 27.04  | 42.97 | 82.33   | 27.87 | 4.00  | 6.00  | 5382903.00  | 576.00  |
| Serbia                           | 39.66 | 87460.00    | 0.79 | 18.00  | 20.46   | NA   | 52.45  | 31.10 | 80.29   | 10.18 | 9.40  | 14.00 | 1727503.00  | NA      |
| Seychelles                       | 3.37  | 460.00      | 0.80 | -15.00 | 55.45   | NA   | 88.02  | 88.41 | 208.35  | NA    | 3.40  | 8.00  | NA          | NA      |
| Sierra Leone                     | 54.71 | 72180.00    | 0.42 | -2.00  | -13.23  | 0.65 | 24.91  | 42.17 | 104.70  | 26.04 | 18.30 | 13.00 | 574706.00   | 2546.00 |
| Singapore                        | 0.93  | 709.00      | 0.93 | -6.00  | 103.85  | NA   | 173.35 | 23.06 | 7915.73 | NA    | 4.30  | 5.00  | NA          | NA      |
| Slovakia                         | 39.97 | 48086.00    | 0.86 | NA     | 17.11   | 0.59 | 96.30  | 40.35 | 113.13  | 7.27  | 6.90  | 10.00 | 376978.00   | 762.70  |
| Slovenia                         | 30.62 | 20140.00    | 0.90 | 12.00  | 14.51   | 0.56 | 82.21  | 61.97 | 102.62  | 8.04  | 8.50  | 10.00 | 137737.00   | 949.30  |

|                 |       |            |      |        |        |      |       |       |        |       |       |       |             |         |
|-----------------|-------|------------|------|--------|--------|------|-------|-------|--------|-------|-------|-------|-------------|---------|
| Solomon Islands | 3.86  | 27990.00   | 0.55 | 15.00  | 159.95 | 0.60 | 45.07 | 78.06 | 21.84  | 25.68 | 8.00  | 5.00  | NA          | 2945.00 |
| Somalia         | 70.34 | 627340.00  | NA   | NA     | 45.34  | 0.53 | 13.46 | 10.14 | 23.50  | 26.77 | NA    | 11.00 | 14909095.00 | 408.30  |
| South Africa    | 79.83 | 1213090.00 | 0.70 | -23.00 | 18.42  | 0.71 | 29.77 | 7.62  | 46.75  | 17.60 | 8.20  | 10.00 | 20331685.00 | 548.30  |
| South Korea     | 17.81 | 97480.00   | 0.90 | 8.00   | 126.98 | 0.42 | 43.09 | 63.44 | 527.97 | 10.66 | 7.40  | 6.00  | 3027.00     | NA      |
| South Sudan     | NA    | NA         | 0.39 | -1.00  | 31.58  | NA   | 54.95 | NA    | NA     | 26.93 | 2.50  | 11.00 | NA          | NA      |
| Spain           | 52.51 | 500210.00  | 0.89 | 7.00   | -3.70  | 0.49 | 34.09 | 36.82 | 93.10  | 13.03 | 9.20  | 9.00  | 16572868.00 | 536.00  |
| Sri Lanka       | 43.69 | 62710.00   | 0.77 | 19.00  | 79.85  | 0.66 | 21.93 | 33.01 | 341.96 | 26.76 | 3.00  | 7.00  | 6202.00     | 1656.00 |
| Sudan           | 28.70 | 2376000.00 | 0.50 | -25.00 | 32.53  | 0.54 | 9.69  | 8.08  | 23.26  | 26.82 | 6.30  | 7.00  | 45883779.00 | NA      |
| Suriname        | 0.57  | 156000.00  | 0.72 | -16.00 | -55.17 | 0.62 | 68.93 | 98.28 | 3.61   | 25.77 | 6.50  | 7.00  | 450.00      | 1848.00 |
| Swaziland       | 71.05 | 17200.00   | 0.59 | -29.00 | 31.13  | NA   | 49.52 | 34.07 | 79.49  | 20.41 | 7.00  | 10.00 | 15973.00    | 648.00  |
| Sweden          | 7.46  | 407310.00  | 0.93 | 9.00   | 18.06  | 0.30 | 45.32 | 68.92 | 24.72  | 1.55  | 11.00 | 9.00  | 563869.00   | 700.40  |
| Switzerland     | 38.18 | 39516.00   | 0.94 | 8.00   | 7.45   | 0.50 | 64.98 | 31.73 | 214.24 | 4.75  | 12.10 | 8.00  | 431889.00   | 1450.00 |
| Syria           | 75.81 | 183630.00  | 0.54 | 8.00   | 36.31  | 0.47 | NA    | 2.67  | 99.49  | 17.65 | NA    | 6.00  | 17884310.00 | 375.80  |
| Taiwan          | NA    | NA         | NA   | NA     | NA     | NA   | NA    | NA    | NA     | NA    | NA    | NA    | NA          | NA      |
| Tajikistan      | 34.19 | 138786.00  | 0.65 | 25.00  | 68.78  | 0.46 | 15.71 | 2.97  | 64.28  | 3.03  | 6.90  | 5.00  | 2846727.00  | 338.60  |
| Tanzania        | 44.76 | 885800.00  | 0.54 | NA     | 35.74  | 0.67 | 19.59 | 52.00 | 64.70  | 22.31 | 6.10  | 7.00  | 5724316.00  | 1114.00 |
| Thailand        | 43.28 | 510890.00  | 0.76 | -7.00  | 100.53 | 0.67 | 68.11 | 32.10 | 135.13 | 26.25 | 3.80  | 8.00  | 43901.00    | 1724.00 |
| Togo            | 70.23 | 54390.00   | 0.50 | 14.00  | 1.21   | 0.69 | 40.47 | 3.46  | 143.37 | 26.80 | 6.60  | 9.00  | 1657114.00  | 1071.00 |

|                                                  |       |                |      |                |         |      |        |       |        |       |       |       |                 |             |
|--------------------------------------------------|-------|----------------|------|----------------|---------|------|--------|-------|--------|-------|-------|-------|-----------------|-------------|
| Tonga                                            | 45.83 | 720.00         | 0.73 | 37.0<br>0      | -175.20 | NA   | 21.31  | 12.50 | 150.03 | NA    | 5.90  | 6.00  | 1240.00         | NA          |
| Trinidad<br>And<br>Tobago                        | 10.53 | 5130.00        | 0.78 | -<br>28.0<br>0 | -61.52  | 0.69 | NA     | 45.71 | 266.89 | 25.86 | 6.00  | 10.00 | NA              | 1839.0<br>0 |
| Tunisia                                          | 64.84 | 155360.00      | 0.74 | 7.00           | 10.17   | 0.41 | 43.81  | 6.70  | 74.23  | 19.36 | 6.70  | 6.00  | 6802420.00      | 326.10      |
| Turkey                                           | 50.08 | 769630.00      | 0.79 | -<br>14.0<br>0 | 32.85   | 0.57 | 24.84  | 15.22 | 104.91 | 10.93 | 4.10  | 6.00  | 30366212.0<br>0 | 614.50      |
| Turkmenist<br>an                                 | 72.01 | 469930.00      | 0.71 | -<br>34.0<br>0 | 58.38   | 0.45 | NA     | 8.78  | 12.25  | 15.22 | 6.30  | 7.00  | 14755794.0<br>0 | 71.38       |
| Turks And<br>Caicos<br>Islands                   | 1.05  | 950.00         | NA   | NA             | -71.14  | NA   | NA     | 36.21 | 37.31  | NA    | NA    | NA    | NA              | NA          |
| U.S. Virgin<br>Islands                           | 11.43 | 350.00         | NA   | NA             | -64.93  | NA   | 40.69  | 50.29 | 306.48 | 25.74 | NA    | 8.00  | NA              | NA          |
| Uganda                                           | 71.89 | 200520.00      | 0.52 | 13.0<br>0      | 32.58   | 0.66 | 18.51  | 10.36 | 213.76 | 22.60 | 7.30  | 9.00  | 3474322.00      | 1350.0<br>0 |
| Ukraine                                          | 71.25 | 579290.00      | 0.75 | 24.0<br>0      | 30.52   | 0.42 | 47.95  | 16.67 | 77.39  | 8.21  | 6.10  | 15.00 | 877504.00       | 1813.0<br>0 |
| United<br>Arab<br>Emirates                       | 4.57  | 83600.00       | 0.86 | -<br>27.0<br>0 | 54.36   | 0.39 | 100.38 | 3.86  | 112.44 | 26.83 | 3.50  | 2.00  | 1841828.00      | 51.95       |
| United<br>Kingdom                                | 70.84 | 241930.00      | 0.92 | 13.0<br>0      | -0.13   | 0.32 | 30.53  | 13.00 | 272.90 | 8.31  | 9.90  | 9.00  | 31018780.0<br>0 | 1082.0<br>0 |
| United<br>States                                 | 44.37 | 9147420.0<br>0 | 0.92 | -2.00          | -77.04  | 0.68 | 11.89  | 33.90 | 35.61  | 6.75  | 16.80 | 8.00  | 5186685.00      | 938.70      |
| United<br>States<br>Minor<br>Outlying<br>Islands | NA    | NA             | NA   | NA             | NA      | NA   | NA     | NA    | NA     | NA    | NA    | NA    | NA              | NA          |
| Uruguay                                          | 82.56 | 175020.00      | 0.80 | 5.00           | -56.17  | 0.49 | 21.56  | 10.54 | 19.75  | 17.57 | 9.20  | 9.00  | 7427126.00      | 1550.0<br>0 |
| Uzbekistan                                       | 62.93 | 425400.00      | 0.71 | 19.0<br>0      | 69.22   | 0.44 | 28.52  | 7.57  | 76.13  | 12.52 | 6.20  | 5.00  | 10613904.0<br>0 | 188.80      |
| Vanuatu                                          | 15.34 | 12190.00       | 0.60 | 19.0<br>0      | 168.32  | 0.39 | 48.56  | 36.10 | 22.66  | 23.84 | 3.50  | 5.00  | 258.00          | NA          |

|                      |       |           |      |           |         |      |        |       |        |       |       |      |            |             |
|----------------------|-------|-----------|------|-----------|---------|------|--------|-------|--------|-------|-------|------|------------|-------------|
| Venezuela            | 24.49 | 882050.00 | 0.76 | 20.0<br>0 | -66.88  | 0.85 | 16.69  | 52.93 | 36.25  | 25.32 | 3.20  | 6.00 | 600986.00  | 1813.0<br>0 |
| Vietnam              | 37.77 | 310070.00 | 0.69 | 14.0<br>0 | 105.84  | 0.68 | 101.56 | 47.64 | 308.13 | 24.07 | 5.70  | 6.00 | NA         | 1991.0<br>0 |
| Wallis And<br>Futuna | NA    | NA        | NA   | NA        | -176.17 | NA   | NA     | NA    | NA     | NA    | NA    | NA   | NA         | NA          |
| Yemen                | 44.60 | 527970.00 | 0.45 | 5.00      | 44.21   | NA   | 3.58   | 1.04  | 53.51  | 23.16 | 6.00  | 6.00 | 9551311.00 | 232.70      |
| Zambia               | 32.06 | 743390.00 | 0.59 | 3.00      | 28.28   | 0.54 | 35.24  | 65.42 | 22.99  | 21.58 | 5.40  | 8.00 | 217503.00  | 1065.0<br>0 |
| Zimbabwe             | 41.88 | 386850.00 | 0.54 | 17.0<br>0 | 31.05   | 0.59 | 24.12  | 36.35 | 42.73  | 21.03 | 10.30 | 8.00 | 362666.00  | 722.50      |
| Channel<br>Islands   | 48.42 | 190.00    | NA   | NA        | -2.54   | NA   | NA     | 4.21  | 870.07 | NA    | NA    | 9.00 | NA         | NA          |

| Country                   | Human<br>micro<br>be | Zoonotic<br>microbe | Emerging<br>microbe | Total<br>micro<br>be | Log<br>exports<br>percent<br>GDP | Log<br>human<br>population<br>density | Log mean<br>annual<br>temperature<br>average | Log<br>health<br>expenditure<br>percent<br>GDP | Log<br>sheep<br>population | GERD US<br>dollar | Log<br>human<br>micro<br>be | Log<br>zoonotic<br>micro<br>be | Log<br>emerging<br>microbe | Log<br>total<br>micro<br>be |
|---------------------------|----------------------|---------------------|---------------------|----------------------|----------------------------------|---------------------------------------|----------------------------------------------|------------------------------------------------|----------------------------|-------------------|-----------------------------|--------------------------------|----------------------------|-----------------------------|
| Afghanistan               | 14.00                | 7.00                | 11.00               | 18.00                | 1.93                             | 4.00                                  | 2.56                                         | 2.33                                           | 15.98                      | NA                | 2.64                        | 1.95                           | 2.40                       | 2.89                        |
| Albania                   | 4.00                 | 3.00                | 3.00                | 8.00                 | 3.45                             | 4.65                                  | 2.42                                         | 1.92                                           | 14.41                      | NA                | 1.39                        | 1.10                           | 1.10                       | 2.08                        |
| Algeria                   | 20.00                | 13.00               | 14.00               | 27.00                | 3.18                             | 2.85                                  | 3.12                                         | 1.96                                           | 16.61                      | 908894.66         | 3.00                        | 2.56                           | 2.64                       | 3.30                        |
| American<br>Samoa         | 1.00                 | NA                  | 1.00                | 2.00                 | 4.18                             | 5.63                                  | NA                                           | NA                                             | NA                         | NA                | 0.00                        | NA                             | 0.00                       | 0.69                        |
| Andorra                   | 1.00                 | NA                  | 1.00                | 1.00                 | NA                               | 5.10                                  | NA                                           | 2.48                                           | 7.88                       | NA                | 0.00                        | NA                             | 0.00                       | 0.00                        |
| Angola                    | 12.00                | 6.00                | 9.00                | 16.00                | 3.40                             | 3.17                                  | 3.07                                         | 1.06                                           | 13.88                      | NA                | 2.48                        | 1.79                           | 2.20                       | 2.77                        |
| Anguilla                  | NA                   | NA                  | NA                  | 1.00                 | NA                               | NA                                    | NA                                           | NA                                             | NA                         | NA                | NA                          | NA                             | NA                         | 0.00                        |
| Antarctica                | 22.00                | 11.00               | 1.00                | 42.00                | NA                               | NA                                    | NA                                           | NA                                             | NA                         | NA                | 3.09                        | 2.40                           | 0.00                       | 3.74                        |
| Antigua<br>And<br>Barbuda | 1.00                 | NA                  | 1.00                | 4.00                 | 3.73                             | 5.45                                  | NA                                           | 1.57                                           | NA                         | NA                | 0.00                        | NA                             | 0.00                       | 1.39                        |
| Argentina                 | 87.00                | 52.00               | 41.00               | 156.00               | 2.41                             | 2.78                                  | 2.65                                         | 1.92                                           | 16.26                      | 1552769.00        | 4.47                        | 3.95                           | 3.71                       | 5.05                        |
| Armenia                   | 3.00                 | 1.00                | 1.00                | 5.00                 | 3.64                             | 4.63                                  | 1.85                                         | 2.31                                           | 13.48                      | 26268.85          | 1.10                        | 0.00                           | 0.00                       | 1.61                        |
| Aruba                     | NA                   | NA                  | NA                  | 2.00                 | NA                               | 6.37                                  | NA                                           | NA                                             | NA                         | NA                | NA                          | NA                             | NA                         | 0.69                        |
| Australia                 | 171.00               | 112.00              | 69.00               | 550.00               | 3.06                             | 1.16                                  | 3.07                                         | 2.24                                           | 18.14                      | 23302690.58       | 5.14                        | 4.72                           | 4.23                       | 6.31                        |
| Austria                   | 65.00                | 42.00               | 26.00               | 134.00               | 3.99                             | 4.67                                  | 1.82                                         | 2.33                                           | 12.90                      | 13789031.88       | 4.17                        | 3.74                           | 3.26                       | 4.90                        |
| Azerbaijan                | 8.00                 | 4.00                | 7.00                | 9.00                 | 3.89                             | 4.78                                  | 2.50                                         | 1.90                                           | 15.89                      | 75523.26          | 2.08                        | 1.39                           | 1.95                       | 2.20                        |
| Bahamas                   | 9.00                 | 3.00                | 2.00                | 20.00                | 3.52                             | 3.68                                  | 3.22                                         | 2.00                                           | NA                         | NA                | 2.20                        | 1.10                           | 0.69                       | 3.00                        |
| Bahrain                   | NA                   | NA                  | NA                  | 5.00                 | 4.30                             | 7.57                                  | NA                                           | 1.65                                           | NA                         | 33419.36          | NA                          | NA                             | NA                         | 1.61                        |
| Bangladesh                | 51.00                | 32.00               | 34.00               | 74.00                | 2.71                             | 7.14                                  | 3.24                                         | 0.96                                           | 14.07                      | NA                | 3.93                        | 3.47                           | 3.53                       | 4.30                        |
| Barbados                  | 1.00                 | NA                  | 1.00                | 3.00                 | 3.61                             | 6.50                                  | NA                                           | 2.01                                           | NA                         | NA                | 0.00                        | NA                             | 0.00                       | 1.10                        |
| Belarus                   | 17.00                | 7.00                | 9.00                | 27.00                | 4.20                             | 3.85                                  | 1.84                                         | 1.81                                           | 10.86                      | 320043.52         | 2.83                        | 1.95                           | 2.20                       | 3.30                        |
| Belgium                   | 52.00                | 35.00               | 22.00               | 120.00               | 4.44                             | 5.93                                  | 2.25                                         | 2.35                                           | 11.51                      | 13452538.37       | 3.95                        | 3.56                           | 3.09                       | 4.79                        |
| Belize                    | 3.00                 | 2.00                | NA                  | 6.00                 | 3.95                             | 2.80                                  | 3.22                                         | 1.82                                           | 9.45                       | NA                | 1.10                        | 0.69                           | NA                         | 1.79                        |
| Benin                     | 14.00                | 7.00                | 12.00               | 16.00                | 3.43                             | 4.60                                  | 3.31                                         | 1.39                                           | 13.66                      | NA                | 2.64                        | 1.95                           | 2.48                       | 2.77                        |
| Bhutan                    | 1.00                 | 1.00                | 1.00                | 4.00                 | 3.26                             | 3.05                                  | 2.15                                         | 1.25                                           | 9.19                       | NA                | 0.00                        | 0.00                           | 0.00                       | 1.39                        |
| Bolivia                   | 24.00                | 19.00               | 13.00               | 31.00                | 3.22                             | 2.32                                  | 3.04                                         | 1.86                                           | 15.65                      | NA                | 3.18                        | 2.94                           | 2.56                       | 3.43                        |



|                                            |        |        |       |        |      |      |      |      |       |                  |      |      |      |      |
|--------------------------------------------|--------|--------|-------|--------|------|------|------|------|-------|------------------|------|------|------|------|
| Bonaire,<br>Saint<br>Eustatius<br>And Saba | 1·00   | 1·00   | NA    | 1·00   | NA   | NA   | NA   | NA   | NA    | NA               | 0·00 | 0·00 | NA   | 0·00 |
| Bosnia<br>And<br>Herzegovin<br>a           | 5·00   | 3·00   | 3·00  | 9·00   | 3·58 | 4·23 | 2·20 | 2·24 | 13·87 | 36151·88         | 1·61 | 1·10 | 1·10 | 2·20 |
| Botswana                                   | 6·00   | 3·00   | 6·00  | 11·00  | 4·01 | 1·40 | 3·07 | 1·79 | 12·33 | 64971·01         | 1·79 | 1·10 | 1·79 | 2·40 |
| Brazil                                     | 176·00 | 122·00 | 70·00 | 384·00 | 2·53 | 3·22 | 3·22 | 2·19 | 16·64 | 21682612·8<br>6  | 5·17 | 4·80 | 4·25 | 5·95 |
| British<br>Virgin<br>Islands               | NA     | NA     | NA    | 1·00   | NA   | 5·34 | NA   | NA   | NA    | NA               | NA   | NA   | NA   | 0·00 |
| Brunei                                     | 1·00   | NA     | NA    | 2·00   | 3·90 | 4·40 | 3·26 | 0·96 | NA    | NA               | 0·00 | NA   | NA   | 0·69 |
| Bulgaria                                   | 23·00  | 14·00  | 11·00 | 49·00  | 4·19 | 4·18 | 2·34 | 2·10 | 14·24 | 458801·45        | 3·14 | 2·64 | 2·40 | 3·89 |
| Burkina<br>Faso                            | 22·00  | 13·00  | 16·00 | 35·00  | 3·35 | 4·25 | 3·34 | 1·69 | 15·87 | 86349·19         | 3·09 | 2·56 | 2·77 | 3·56 |
| Burundi                                    | 10·00  | 5·00   | 8·00  | 12·00  | 1·83 | 6·05 | 3·01 | 2·10 | 12·30 | NA               | 2·30 | 1·61 | 2·08 | 2·48 |
| Cambodia                                   | 25·00  | 15·00  | 15·00 | 31·00  | 4·11 | 4·51 | 3·29 | 1·79 | 9·49  | 21431·77         | 3·22 | 2·71 | 2·71 | 3·43 |
| Cameroon                                   | 33·00  | 20·00  | 24·00 | 67·00  | 2·83 | 3·93 | 3·20 | 1·63 | 12·76 | NA               | 3·50 | 3·00 | 3·18 | 4·20 |
| Canada                                     | 119·00 | 75·00  | 58·00 | 291·00 | 3·43 | 1·40 | NA   | 2·34 | 13·75 | 26587191·3<br>6  | 4·78 | 4·32 | 4·06 | 5·67 |
| Cape<br>Verde                              | 6·00   | 2·00   | 5·00  | 12·00  | 3·67 | 4·91 | NA   | 1·57 | 9·25  | NA               | 1·79 | 0·69 | 1·61 | 2·48 |
| Cayman<br>Islands                          | NA     | NA     | NA    | 1·00   | NA   | 5·55 | NA   | NA   | NA    | NA               | NA   | NA   | NA   | 0·00 |
| Central<br>African<br>Republic             | 23·00  | 13·00  | 18·00 | 32·00  | 2·53 | 2·01 | 3·21 | 1·57 | 11·80 | NA               | 3·14 | 2·56 | 2·89 | 3·47 |
| Chad                                       | 9·00   | 5·00   | 8·00  | 10·00  | 3·52 | 2·47 | 3·28 | 1·53 | 15·65 | 30891·53         | 2·20 | 1·61 | 2·08 | 2·30 |
| Chile                                      | 43·00  | 31·00  | 27·00 | 81·00  | 3·36 | 3·19 | 2·12 | 2·09 | 15·17 | 956647·09        | 3·76 | 3·43 | 3·30 | 4·39 |
| China                                      | 297·00 | 187·00 | 91·00 | 766·00 | 2·98 | 5·00 | 1·85 | 1·67 | 18·97 | 266114411·<br>90 | 5·69 | 5·23 | 4·51 | 6·64 |
| Colombia                                   | 49·00  | 29·00  | 27·00 | 85·00  | 2·69 | 3·79 | 3·19 | 1·82 | 14·09 | 0·21             | 3·89 | 3·37 | 3·30 | 4·44 |
| Comoros                                    | 4·00   | 3·00   | 3·00  | 4·00   | 2·87 | 6·08 | 3·18 | 2·08 | 9·86  | NA               | 1·39 | 1·10 | 1·10 | 1·39 |
| Cook<br>Islands                            | NA     | NA     | NA    | 1·00   | NA   | NA   | NA   | NA   | NA    | NA               | NA   | NA   | NA   | 0·00 |
| Costa Rica                                 | 15·00  | 9·00   | 10·00 | 38·00  | 3·53 | 4·57 | 3·17 | 2·09 | 10·49 | 246292·78        | 2·71 | 2·20 | 2·30 | 3·64 |

|                                  |        |       |       |        |      |      |      |      |       |             |      |      |      |      |
|----------------------------------|--------|-------|-------|--------|------|------|------|------|-------|-------------|------|------|------|------|
| Croatia                          | 25.00  | 16.00 | 15.00 | 53.00  | 3.94 | 4.30 | 2.35 | 2.00 | 13.53 | 503424.11   | 3.22 | 2.77 | 2.71 | 3.97 |
| Cuba                             | 23.00  | 13.00 | 16.00 | 35.00  | 2.84 | 4.70 | 3.22 | NA   | 13.82 | 508658.54   | 3.14 | 2.56 | 2.77 | 3.56 |
| Curacao                          | 1.00   | NA    | 1.00  | 2.00   | NA   | 5.89 | NA   | NA   | NA    | NA          | 0.00 | NA   | 0.00 | 0.69 |
| Cyprus                           | 23.00  | 14.00 | 15.00 | 33.00  | 4.16 | 4.85 | 2.93 | 1.92 | 12.50 | 128335.30   | 3.14 | 2.64 | 2.71 | 3.50 |
| Czech Republic                   | 51.00  | 28.00 | 20.00 | 202.00 | 4.38 | 4.92 | 2.04 | 1.99 | 12.12 | NA          | 3.93 | 3.33 | 3.00 | 5.31 |
| Democratic Republic Of The Congo | 36.00  | 21.00 | 26.00 | 53.00  | 3.57 | 3.58 | 3.18 | 1.46 | 13.61 | 97433.31    | 3.58 | 3.04 | 3.26 | 3.97 |
| Denmark                          | 72.00  | 44.00 | 32.00 | 129.00 | 4.01 | 4.92 | 2.06 | 2.33 | 11.98 | 10539667.46 | 4.28 | 3.78 | 3.47 | 4.86 |
| Djibouti                         | 6.00   | 3.00  | 6.00  | 8.00   | 3.53 | 3.72 | 3.32 | 1.48 | NA    | NA          | 1.79 | 1.10 | 1.79 | 2.08 |
| Dominica                         | 1.00   | NA    | 1.00  | 5.00   | 3.79 | 4.59 | NA   | 1.69 | NA    | NA          | 0.00 | NA   | 0.00 | 1.61 |
| Dominican Republic               | 9.00   | 3.00  | 5.00  | 13.00  | 3.21 | 5.41 | 3.18 | 1.82 | NA    | NA          | 2.20 | 1.10 | 1.61 | 2.56 |
| East Timor                       | 3.00   | 1.00  | 3.00  | 4.00   | 0.83 | 4.47 | 3.22 | 1.13 | NA    | NA          | 1.10 | 0.00 | 1.10 | 1.39 |
| Ecuador                          | 33.00  | 21.00 | 19.00 | 47.00  | 3.03 | 4.20 | 3.06 | 2.14 | 13.94 | 450306.47   | 3.50 | 3.04 | 2.94 | 3.85 |
| Egypt                            | 74.00  | 48.00 | 35.00 | 128.00 | 2.79 | 4.58 | 3.10 | 1.44 | 15.50 | 1182586.05  | 4.30 | 3.87 | 3.56 | 4.85 |
| El Salvador                      | 9.00   | 3.00  | 8.00  | 11.00  | 3.32 | 5.73 | 3.21 | 1.93 | 9.35  | 35060.00    | 2.20 | 1.10 | 2.08 | 2.40 |
| Equatorial Guinea                | 8.00   | 3.00  | 8.00  | 13.00  | 4.03 | 3.81 | 3.18 | 0.99 | NA    | NA          | 2.08 | 1.10 | 2.08 | 2.56 |
| Eritrea                          | 2.00   | 1.00  | 1.00  | 3.00   | NA   | 3.79 | 3.26 | 1.19 | 14.57 | NA          | 0.69 | 0.00 | 0.00 | 1.10 |
| Estonia                          | 16.00  | 11.00 | 10.00 | 27.00  | 4.36 | 3.44 | 1.62 | 1.87 | 11.38 | 359291.62   | 2.77 | 2.40 | 2.30 | 3.30 |
| Ethiopia                         | 34.00  | 21.00 | 24.00 | 52.00  | 2.05 | 4.65 | 3.11 | 1.39 | 16.93 | 219631.67   | 3.53 | 3.04 | 3.18 | 3.95 |
| Falkland Islands                 | 1.00   | 1.00  | 1.00  | 1.00   | NA   | NA   | 1.76 | NA   | 13.43 | NA          | 0.00 | 0.00 | 0.00 | 0.00 |
| Faroe Islands                    | 1.00   | 1.00  | NA    | 3.00   | NA   | 3.56 | NA   | NA   | NA    | NA          | 0.00 | 0.00 | NA   | 1.10 |
| Fiji                             | 9.00   | 5.00  | 8.00  | 12.00  | 3.27 | 3.90 | 3.15 | 1.28 | 9.55  | NA          | 2.20 | 1.61 | 2.08 | 2.48 |
| Finland                          | 54.00  | 37.00 | 23.00 | 112.00 | 3.65 | 2.90 | 0.30 | 2.24 | 11.75 | 7288311.69  | 3.99 | 3.61 | 3.14 | 4.72 |
| France                           | 148.00 | 99.00 | 64.00 | 374.00 | 3.43 | 4.81 | 2.36 | 2.41 | 15.82 | 59218417.95 | 5.00 | 4.60 | 4.16 | 5.92 |
| French Guiana                    | 15.00  | 11.00 | 10.00 | 22.00  | NA   | NA   | 3.24 | NA   | 6.57  | NA          | 2.71 | 2.40 | 2.30 | 3.09 |
| French Polynesia                 | 22.00  | 14.00 | 16.00 | 36.00  | NA   | 4.35 | NA   | NA   | NA    | NA          | 3.09 | 2.64 | 2.77 | 3.58 |
| Gabon                            | 18.00  | 8.00  | 14.00 | 29.00  | 3.78 | 2.06 | 3.22 | 0.99 | 12.18 | NA          | 2.89 | 2.08 | 2.64 | 3.37 |

|               |        |        |       |        |      |       |      |      |       |              |      |      |      |      |
|---------------|--------|--------|-------|--------|------|-------|------|------|-------|--------------|------|------|------|------|
| Gambia        | 11.00  | 4.00   | 9.00  | 16.00  | 3.04 | 5.34  | 3.29 | 1.90 | 11.77 | NA           | 2.40 | 1.39 | 2.20 | 2.77 |
| Georgia       | 13.00  | 8.00   | 8.00  | 18.00  | 3.92 | 4.17  | 2.00 | 2.07 | 13.38 | 43884.46     | 2.56 | 2.08 | 2.08 | 2.89 |
| Germany       | 152.00 | 85.00  | 41.00 | 359.00 | 3.86 | 5.47  | 2.14 | 2.42 | 14.57 | 116944687.10 | 5.02 | 4.44 | 3.71 | 5.88 |
| Ghana         | 31.00  | 17.00  | 16.00 | 54.00  | 3.69 | 4.84  | 3.31 | 1.77 | 15.20 | NA           | 3.43 | 2.83 | 2.77 | 3.99 |
| Greece        | 51.00  | 27.00  | 28.00 | 84.00  | 3.50 | 4.42  | 2.61 | 2.13 | 15.98 | 2400236.13   | 3.93 | 3.30 | 3.33 | 4.43 |
| Greenland     | 5.00   | 4.00   | 3.00  | 6.00   | 3.66 | -1.99 | NA   | NA   | NA    | NA           | 1.61 | 1.39 | 1.10 | 1.79 |
| Grenada       | 2.00   | NA     | 1.00  | 3.00   | 4.03 | 5.76  | NA   | 1.61 | NA    | NA           | 0.69 | NA   | 0.00 | 1.10 |
| Guadeloupe    | 4.00   | 2.00   | 2.00  | 7.00   | NA   | NA    | 3.22 | NA   | 6.30  | NA           | 1.39 | 0.69 | 0.69 | 1.95 |
| Guam          | 5.00   | 2.00   | 5.00  | 8.00   | 2.97 | 5.72  | NA   | NA   | NA    | NA           | 1.61 | 0.69 | 1.61 | 2.08 |
| Guatemala     | 24.00  | 17.00  | 14.00 | 30.00  | 2.93 | 5.06  | 3.14 | 1.74 | 12.74 | 19843.54     | 3.18 | 2.83 | 2.64 | 3.40 |
| Guinea        | 8.00   | 3.00   | 7.00  | 11.00  | 3.76 | 3.95  | 3.24 | 1.50 | 13.76 | NA           | 2.08 | 1.10 | 1.95 | 2.40 |
| Guinea-Bissau | 10.00  | 6.00   | 10.00 | 12.00  | 3.31 | 4.19  | 3.28 | 1.93 | 12.66 | NA           | 2.30 | 1.79 | 2.30 | 2.48 |
| Guyana        | 4.00   | 1.00   | 3.00  | 6.00   | 3.78 | 1.37  | 3.25 | 1.50 | NA    | NA           | 1.39 | 0.00 | 1.10 | 1.79 |
| Haiti         | 17.00  | 7.00   | 14.00 | 21.00  | 2.94 | 5.99  | 3.20 | 1.93 | 12.79 | NA           | 2.83 | 1.95 | 2.64 | 3.04 |
| Honduras      | 6.00   | 1.00   | 6.00  | 12.00  | 3.77 | 4.42  | 3.15 | 2.03 | NA    | 2933.59      | 1.79 | 0.00 | 1.79 | 2.48 |
| Hong Kong     | 57.00  | 35.00  | 31.00 | 86.00  | 5.24 | 8.86  | NA   | NA   | NA    | NA           | 4.04 | 3.56 | 3.43 | 4.45 |
| Hungary       | 54.00  | 31.00  | 24.00 | 127.00 | 4.50 | 4.68  | 2.31 | 1.97 | 14.03 | 1914267.32   | 3.99 | 3.43 | 3.18 | 4.84 |
| Iceland       | 7.00   | 3.00   | 4.00  | 16.00  | 3.85 | 1.23  | 0.30 | 2.15 | 13.06 | 513924.28    | 1.95 | 1.10 | 1.39 | 2.77 |
| India         | 229.00 | 136.00 | 67.00 | 496.00 | 2.94 | 6.11  | 3.18 | 1.36 | 18.23 | 12476582.49  | 5.43 | 4.91 | 4.20 | 6.21 |
| Indonesia     | 51.00  | 29.00  | 26.00 | 83.00  | 3.01 | 4.98  | 3.25 | 1.19 | 15.15 | 2272311.26   | 3.93 | 3.37 | 3.26 | 4.42 |
| Iran          | 123.00 | 77.00  | 47.00 | 211.00 | 3.17 | 3.91  | 2.83 | 2.03 | 17.73 | 755424.56    | 4.81 | 4.34 | 3.85 | 5.35 |
| Iraq          | 14.00  | 8.00   | 7.00  | 19.00  | 3.63 | 4.48  | 3.07 | 1.22 | 15.86 | 86052.74     | 2.64 | 2.08 | 1.95 | 2.94 |
| Ireland       | 36.00  | 22.00  | 19.00 | 55.00  | 4.79 | 4.25  | 2.21 | 2.05 | 15.66 | 3649704.84   | 3.58 | 3.09 | 2.94 | 4.01 |
| Isle Of Man   | NA     | NA     | NA    | 1.00   | NA   | 5.00  | NA   | NA   | NA    | NA           | NA   | NA   | NA   | 0.00 |
| Israel        | 47.00  | 29.00  | 22.00 | 91.00  | 3.41 | 6.00  | 2.98 | 2.00 | 12.63 | 16093372.32  | 3.85 | 3.37 | 3.09 | 4.51 |
| Italy         | 152.00 | 98.00  | 54.00 | 321.00 | 3.44 | 5.33  | 2.44 | 2.20 | 15.64 | 27574079.10  | 5.02 | 4.58 | 3.99 | 5.77 |
| Ivory Coast   | 20.00  | 11.00  | 12.00 | 36.00  | 3.37 | 4.34  | 3.27 | 1.69 | 13.71 | NA           | 3.00 | 2.40 | 2.48 | 3.58 |
| Jamaica       | 8.00   | 2.00   | 5.00  | 15.00  | 3.45 | 5.59  | 3.20 | 1.77 | 9.31  | NA           | 2.08 | 0.69 | 1.61 | 2.71 |
| Japan         | 263.00 | 168.00 | 70.00 | 586.00 | 2.78 | 5.85  | 2.34 | 2.39 | 9.69  | 158592512.40 | 5.57 | 5.12 | 4.25 | 6.37 |

|               |        |       |       |        |      |      |      |      |       |            |      |      |      |      |
|---------------|--------|-------|-------|--------|------|------|------|------|-------|------------|------|------|------|------|
| Jordan        | 6.00   | 4.00  | 4.00  | 7.00   | 3.57 | 4.69 | 2.91 | 1.84 | 14.73 | 277439.31  | 1.79 | 1.39 | 1.39 | 1.95 |
| Kazakhstan    | 7.00   | 5.00  | 5.00  | 17.00  | 3.46 | 1.90 | 1.79 | 1.36 | 16.51 | 211301.23  | 1.95 | 1.61 | 1.61 | 2.83 |
| Kenya         | 64.00  | 40.00 | 40.00 | 105.00 | 2.63 | 4.47 | 3.20 | 1.65 | 16.66 | NA         | 4.16 | 3.69 | 3.69 | 4.65 |
| Kiribati      | 1.00   | NA    | 1.00  | 3.00   | 2.29 | 4.97 | NA   | 2.03 | NA    | NA         | 0.00 | NA   | 0.00 | 1.10 |
| Kuwait        | 18.00  | 13.00 | 11.00 | 39.00  | 3.88 | 5.45 | 3.22 | 1.39 | 13.35 | 98121.88   | 2.89 | 2.56 | 2.40 | 3.66 |
| Kyrgyzstan    | 7.00   | 4.00  | 5.00  | 12.00  | 3.57 | 3.48 | 0.09 | 2.10 | 14.93 | 8247.42    | 1.95 | 1.39 | 1.61 | 2.48 |
| Laos          | 15.00  | 10.00 | 6.00  | 17.00  | 3.54 | 3.39 | 3.15 | 1.03 | 9.92  | NA         | 2.71 | 2.30 | 1.79 | 2.83 |
| Latvia        | 12.00  | 5.00  | 6.00  | 22.00  | 4.10 | 3.44 | 1.73 | 1.76 | 11.31 | 162809.92  | 2.48 | 1.61 | 1.79 | 3.09 |
| Lebanon       | 9.00   | 6.00  | 7.00  | 10.00  | 3.16 | 6.39 | 2.75 | 2.00 | 12.49 | NA         | 2.20 | 1.79 | 1.95 | 2.30 |
| Lesotho       | 1.00   | 1.00  | 1.00  | 1.00   | 3.74 | 4.30 | 2.48 | 2.13 | 14.11 | 1152.16    | 0.00 | 0.00 | 0.00 | 0.00 |
| Liberia       | 8.00   | 4.00  | 7.00  | 9.00   | 3.06 | 3.89 | 3.23 | 2.72 | 10.79 | NA         | 2.08 | 1.39 | 1.95 | 2.20 |
| Libya         | 6.00   | 4.00  | 6.00  | 7.00   | 3.64 | 1.29 | 3.09 | NA   | 15.43 | NA         | 1.79 | 1.39 | 1.79 | 1.95 |
| Liechtenstein | 1.00   | 1.00  | NA    | 1.00   | NA   | 5.47 | NA   | NA   | 8.28  | NA         | 0.00 | 0.00 | NA   | 0.00 |
| Lithuania     | 26.00  | 9.00  | 6.00  | 47.00  | 4.40 | 3.81 | 1.83 | 1.87 | 10.88 | 441056.67  | 3.26 | 2.20 | 1.79 | 3.85 |
| Luxembourg    | 5.00   | 2.00  | 4.00  | 7.00   | 5.44 | 5.44 | 2.18 | 1.79 | 9.00  | 820070.84  | 1.61 | 0.69 | 1.39 | 1.95 |
| Macao         | 1.00   | NA    | 1.00  | 1.00   | 4.37 | 9.93 | NA   | NA   | NA    | NA         | 0.00 | NA   | 0.00 | 0.00 |
| Macedonia     | 1.00   | 1.00  | 1.00  | 4.00   | 4.01 | 4.41 | 2.29 | 1.81 | 13.53 | 42038.50   | 0.00 | 0.00 | 0.00 | 1.39 |
| Madagascar    | 21.00  | 12.00 | 19.00 | 29.00  | 3.57 | 3.78 | 3.09 | 1.65 | 13.45 | 1679.45    | 3.04 | 2.48 | 2.94 | 3.37 |
| Malawi        | 17.00  | 8.00  | 17.00 | 21.00  | 3.37 | 5.29 | 3.09 | 2.23 | 11.25 | NA         | 2.83 | 2.08 | 2.83 | 3.04 |
| Malaysia      | 81.00  | 50.00 | 33.00 | 156.00 | 4.27 | 4.57 | 3.22 | 1.39 | 11.79 | 4112882.03 | 4.39 | 3.91 | 3.50 | 5.05 |
| Maldives      | 56.00  | 39.00 | 39.00 | 63.00  | 4.29 | 7.28 | NA   | 2.44 | NA    | NA         | 4.03 | 3.66 | 3.66 | 4.14 |
| Mali          | 20.00  | 7.00  | 10.00 | 30.00  | 3.09 | 2.72 | 3.34 | 1.76 | 15.92 | 44754.27   | 3.00 | 1.95 | 2.30 | 3.40 |
| Malta         | 3.00   | 2.00  | 3.00  | 4.00   | 4.91 | 7.28 | NA   | 2.26 | 9.38  | 72153.48   | 1.10 | 0.69 | 1.10 | 1.39 |
| Martinique    | 6.00   | 2.00  | 6.00  | 9.00   | NA   | NA   | NA   | NA   | 8.29  | NA         | 1.79 | 0.69 | 1.79 | 2.20 |
| Mauritania    | 7.00   | 4.00  | 6.00  | 12.00  | 3.77 | 1.46 | 3.32 | 1.53 | 14.03 | NA         | 1.95 | 1.39 | 1.79 | 2.48 |
| Mauritius     | 4.00   | 2.00  | 3.00  | 9.00   | 3.74 | 6.43 | 3.14 | 1.70 | 7.69  | 48578.89   | 1.39 | 0.69 | 1.10 | 2.20 |
| Mayotte       | 5.00   | 3.00  | 5.00  | 5.00   | NA   | NA   | NA   | NA   | 7.00  | NA         | 1.61 | 1.10 | 1.61 | 1.61 |
| Mexico        | 102.00 | 61.00 | 48.00 | 234.00 | 3.63 | 4.20 | 3.02 | 1.77 | 15.80 | 5081339.53 | 4.62 | 4.11 | 3.87 | 5.46 |
| Micronesia    | 6.00   | 2.00  | 6.00  | 8.00   | 3.28 | 5.02 | NA   | 2.57 | NA    | NA         | 1.79 | 0.69 | 1.79 | 2.08 |
| Moldova       | 2.00   | 1.00  | 2.00  | 3.00   | 3.75 | 4.82 | 2.27 | 2.32 | 13.45 | NA         | 0.69 | 0.00 | 0.69 | 1.10 |
| Mongolia      | 15.00  | 5.00  | 9.00  | 26.00  | 4.09 | 0.68 | NA   | 1.36 | 16.71 | 15407.33   | 2.71 | 1.61 | 2.20 | 3.26 |
| Montserrat    | 1.00   | NA    | 1.00  | 2.00   | NA   | NA   | NA   | NA   | NA    | NA         | 0.00 | NA   | 0.00 | 0.69 |
| Morocco       | 29.00  | 16.00 | 16.00 | 50.00  | 3.60 | 4.38 | 2.85 | 1.70 | 16.60 | NA         | 3.37 | 2.77 | 2.77 | 3.91 |
| Mozambique    | 13.00  | 5.00  | 6.00  | 23.00  | 3.64 | 3.63 | 3.17 | 1.69 | 12.76 | 31408.62   | 2.56 | 1.61 | 1.79 | 3.14 |
| Myanmar       | 19.00  | 11.00 | 11.00 | 26.00  | 2.84 | 4.40 | 3.13 | 1.59 | 13.55 | 21181.75   | 2.94 | 2.40 | 2.40 | 3.26 |

|                          |       |       |       |        |      |      |       |      |       |             |      |      |      |      |
|--------------------------|-------|-------|-------|--------|------|------|-------|------|-------|-------------|------|------|------|------|
| Namibia                  | 7.00  | 5.00  | 5.00  | 14.00  | 3.60 | 1.12 | 3.00  | 2.19 | 14.81 | 35442.06    | 1.95 | 1.61 | 1.61 | 2.64 |
| Nepal                    | 26.00 | 18.00 | 19.00 | 44.00  | 2.28 | 5.32 | 2.54  | 1.81 | 13.30 | NA          | 3.26 | 2.89 | 2.94 | 3.78 |
| Netherlands              | 74.00 | 43.00 | 34.00 | 153.00 | 4.46 | 6.23 | 2.22  | 2.37 | 13.94 | 17326446.28 | 4.30 | 3.76 | 3.53 | 5.03 |
| New Caledonia            | 11.00 | 7.00  | 9.00  | 18.00  | NA   | 2.73 | 3.09  | NA   | 7.05  | NA          | 2.40 | 1.95 | 2.20 | 2.89 |
| New Zealand              | 35.00 | 19.00 | 21.00 | 69.00  | 3.25 | 2.90 | 2.30  | 2.23 | 17.26 | 2168166.09  | 3.56 | 2.94 | 3.04 | 4.23 |
| Nicaragua                | 12.00 | 5.00  | 6.00  | 18.00  | 3.72 | 3.94 | 3.20  | 2.05 | 11.57 | 12429.12    | 2.48 | 1.61 | 1.79 | 2.89 |
| Niger                    | 11.00 | 4.00  | 6.00  | 13.00  | 2.81 | 2.83 | 3.30  | 1.97 | 16.03 | NA          | 2.40 | 1.39 | 1.79 | 2.56 |
| Nigeria                  | 58.00 | 38.00 | 38.00 | 90.00  | 2.22 | 5.35 | 3.29  | 1.28 | 17.44 | NA          | 4.06 | 3.64 | 3.64 | 4.50 |
| Niue                     | NA    | NA    | NA    | 1.00   | NA   | NA   | NA    | NA   | NA    | NA          | NA   | NA   | NA   | 0.00 |
| North Korea              | 2.00  | 1.00  | 2.00  | 2.00   | NA   | 5.36 | 1.58  | NA   | NA    | NA          | 0.69 | 0.00 | 0.69 | 0.69 |
| Northern Mariana Islands | 2.00  | 2.00  | 1.00  | 2.00   | 4.30 | 4.79 | NA    | NA   | NA    | NA          | 0.69 | 0.69 | 0.00 | 0.69 |
| Norway                   | 47.00 | 35.00 | 25.00 | 109.00 | 3.57 | 2.67 | -0.29 | 2.30 | 14.65 | 8571621.79  | 3.85 | 3.56 | 3.22 | 4.69 |
| Oman                     | 18.00 | 13.00 | 6.00  | 30.00  | 3.72 | 2.71 | 3.24  | 1.34 | 12.87 | 163013.31   | 2.89 | 2.56 | 1.79 | 3.40 |
| Pakistan                 | 47.00 | 26.00 | 24.00 | 76.00  | 2.11 | 5.54 | 2.99  | 0.99 | 16.53 | 715169.98   | 3.85 | 3.26 | 3.18 | 4.33 |
| Palau                    | NA    | NA    | NA    | 6.00   | 3.92 | 3.86 | NA    | 2.36 | NA    | NA          | NA   | NA   | NA   | 1.79 |
| Palestinian Territory    | 2.00  | 1.00  | 1.00  | 3.00   | NA   | NA   | NA    | NA   | NA    | NA          | 0.69 | 0.00 | 0.00 | 1.10 |
| Panama                   | 31.00 | 21.00 | 15.00 | 44.00  | 3.72 | 4.01 | 3.21  | 1.95 | 9.83  | 28300.00    | 3.43 | 3.04 | 2.71 | 3.78 |
| Papua New Guinea         | 15.00 | 6.00  | 13.00 | 23.00  | NA   | 2.90 | 3.22  | 1.34 | NA    | 6439.44     | 2.71 | 1.79 | 2.56 | 3.14 |
| Paraguay                 | 7.00  | 4.00  | 5.00  | 21.00  | 3.73 | 2.84 | 3.16  | 2.05 | 12.81 | 42525.70    | 1.95 | 1.39 | 1.61 | 3.04 |
| Peru                     | 42.00 | 29.00 | 27.00 | 59.00  | 3.19 | 3.22 | 2.97  | 1.67 | 16.07 | 252940.43   | 3.74 | 3.37 | 3.30 | 4.08 |
| Philippines              | 34.00 | 21.00 | 21.00 | 44.00  | 3.42 | 5.86 | 3.23  | 1.48 | 10.80 | 315768.06   | 3.53 | 3.04 | 3.04 | 3.78 |
| Poland                   | 51.00 | 37.00 | 27.00 | 111.00 | 3.98 | 4.82 | 2.06  | 1.84 | 12.29 | 5697259.14  | 3.93 | 3.61 | 3.30 | 4.71 |
| Portugal                 | 68.00 | 42.00 | 27.00 | 134.00 | 3.76 | 4.72 | 2.71  | 2.20 | 14.61 | 3025632.82  | 4.22 | 3.74 | 3.30 | 4.90 |
| Puerto Rico              | 24.00 | 16.00 | 18.00 | 39.00  | 4.23 | 5.93 | 3.19  | NA   | 9.28  | NA          | 3.18 | 2.77 | 2.89 | 3.66 |
| Qatar                    | 5.00  | 4.00  | 2.00  | 7.00   | 3.86 | 5.43 | 3.29  | 1.13 | 13.01 | 839159.34   | 1.61 | 1.39 | 0.69 | 1.95 |
| Republic Of The Congo    | 13.00 | 4.00  | 12.00 | 20.00  | 4.38 | 2.73 | 3.20  | 1.22 | 8.87  | NA          | 2.56 | 1.39 | 2.48 | 3.00 |
| Reunion                  | 3.00  | 2.00  | 2.00  | 10.00  | NA   | NA   | 3.05  | NA   | 7.66  | NA          | 1.10 | 0.69 | 0.69 | 2.30 |
| Romania                  | 27.00 | 17.00 | 16.00 | 41.00  | 3.72 | 4.44 | 2.18  | 1.61 | 16.07 | 1095151.45  | 3.30 | 2.83 | 2.77 | 3.71 |

|                                  |        |       |       |        |      |      |      |      |       |             |      |      |      |      |
|----------------------------------|--------|-------|-------|--------|------|------|------|------|-------|-------------|------|------|------|------|
| Russia                           | 114.00 | 69.00 | 51.00 | 230.00 | 3.26 | 2.18 | NA   | 1.72 | 16.81 | 16262724.20 | 4.74 | 4.23 | 3.93 | 5.44 |
| Rwanda                           | 9.00   | 3.00  | 9.00  | 12.00  | 2.90 | 6.20 | 2.94 | 2.07 | 13.35 | NA          | 2.20 | 1.10 | 2.20 | 2.48 |
| Saint Helena                     | 2.00   | 2.00  | 2.00  | 2.00   | NA   | NA   | NA   | NA   | 6.48  | NA          | 0.69 | 0.69 | 0.69 | 0.69 |
| Saint Kitts And Nevis            | NA     | NA    | NA    | 3.00   | 4.04 | 5.36 | NA   | 1.72 | NA    | NA          | NA   | NA   | NA   | 1.10 |
| Saint Lucia                      | 1.00   | NA    | 1.00  | 2.00   | NA   | 5.68 | NA   | 1.79 | 8.95  | NA          | 0.00 | NA   | 0.00 | 0.69 |
| Saint Martin                     | 1.00   | NA    | 1.00  | 1.00   | NA   | 6.38 | NA   | NA   | NA    | NA          | 0.00 | NA   | 0.00 | 0.00 |
| Saint Martin                     | 1.00   | NA    | 1.00  | 1.00   | NA   | 7.10 | NA   | NA   | NA    | NA          | 0.00 | NA   | 0.00 | 0.00 |
| Saint Vincent And The Grenadines | 1.00   | NA    | 1.00  | 2.00   | 3.54 | 5.64 | 3.29 | 1.44 | NA    | NA          | 0.00 | NA   | 0.00 | 0.69 |
| Samoa                            | 6.00   | 2.00  | 6.00  | 7.00   | 3.38 | 4.24 | NA   | 1.72 | 5.52  | NA          | 1.79 | 0.69 | 1.79 | 1.95 |
| Sao Tome And Principe            | 3.00   | 1.00  | 1.00  | 3.00   | NA   | 5.36 | NA   | 2.28 | NA    | NA          | 1.10 | 0.00 | 0.00 | 1.10 |
| Saudi Arabia                     | 49.00  | 29.00 | 28.00 | 70.00  | 3.51 | 2.73 | 3.20 | 1.76 | 15.65 | 6086391.81  | 3.89 | 3.37 | 3.33 | 4.25 |
| Senegal                          | 38.00  | 24.00 | 26.00 | 51.00  | 3.30 | 4.41 | 3.33 | 1.39 | 15.50 | 104203.85   | 3.64 | 3.18 | 3.26 | 3.93 |
| Serbia                           | 6.00   | 3.00  | 4.00  | 17.00  | 3.96 | 4.39 | 2.32 | 2.24 | 14.36 | 385403.20   | 1.79 | 1.10 | 1.39 | 2.83 |
| Seychelles                       | 3.00   | 2.00  | 3.00  | 4.00   | 4.48 | 5.34 | NA   | 1.22 | NA    | 3087.07     | 1.10 | 0.69 | 1.10 | 1.39 |
| Sierra Leone                     | 7.00   | 4.00  | 7.00  | 11.00  | 3.22 | 4.65 | 3.26 | 2.91 | 13.26 | NA          | 1.95 | 1.39 | 1.95 | 2.40 |
| Singapore                        | 55.00  | 31.00 | 36.00 | 69.00  | 5.16 | 8.98 | NA   | 1.46 | NA    | 6898115.94  | 4.01 | 3.43 | 3.58 | 4.23 |
| Slovakia                         | 20.00  | 13.00 | 8.00  | 49.00  | 4.57 | 4.73 | 1.98 | 1.93 | 12.84 | 35063.44    | 3.00 | 2.56 | 2.08 | 3.89 |
| Slovenia                         | 21.00  | 13.00 | 14.00 | 40.00  | 4.41 | 4.63 | 2.08 | 2.14 | 11.83 | 945847.70   | 3.04 | 2.56 | 2.64 | 3.69 |
| Solomon Islands                  | 10.00  | 3.00  | 9.00  | 13.00  | 3.81 | 3.08 | 3.25 | 2.08 | NA    | NA          | 2.30 | 1.10 | 2.20 | 2.56 |
| Somalia                          | 11.00  | 5.00  | 8.00  | 13.00  | 2.60 | 3.16 | 3.29 | NA   | 16.52 | NA          | 2.40 | 1.61 | 2.08 | 2.56 |
| South Africa                     | 76.00  | 45.00 | 38.00 | 162.00 | 3.39 | 3.84 | 2.87 | 2.10 | 16.83 | 2695640.28  | 4.33 | 3.81 | 3.64 | 5.09 |
| South Korea                      | 88.00  | 53.00 | 35.00 | 219.00 | 3.76 | 6.27 | 2.37 | 2.00 | 8.02  | NA          | 4.48 | 3.97 | 3.56 | 5.39 |
| South Sudan                      | 2.00   | 2.00  | 2.00  | 6.00   | 4.01 | NA   | 3.29 | 0.92 | NA    | NA          | 0.69 | 0.69 | 0.69 | 1.79 |

|                          |        |        |       |        |      |      |      |      |       |              |      |      |      |      |
|--------------------------|--------|--------|-------|--------|------|------|------|------|-------|--------------|------|------|------|------|
| Spain                    | 151.00 | 93.00  | 54.00 | 384.00 | 3.53 | 4.53 | 2.57 | 2.22 | 16.62 | 16590318.77  | 5.02 | 4.53 | 3.99 | 5.95 |
| Sri Lanka                | 10.00  | 6.00   | 9.00  | 19.00  | 3.09 | 5.83 | 3.29 | 1.10 | 8.73  | 78084.62     | 2.30 | 1.79 | 2.20 | 2.94 |
| Sudan                    | 24.00  | 18.00  | 16.00 | 40.00  | 2.27 | 3.15 | 3.29 | 1.84 | 17.64 | NA           | 3.18 | 2.89 | 2.77 | 3.69 |
| Suriname                 | 2.00   | NA     | 2.00  | 4.00   | 4.23 | 1.28 | 3.25 | 1.87 | 6.11  | NA           | 0.69 | NA   | 0.69 | 1.39 |
| Swaziland                | 1.00   | 1.00   | 1.00  | 3.00   | 3.90 | 4.38 | 3.02 | 1.95 | 9.68  | NA           | 0.00 | 0.00 | 0.00 | 1.10 |
| Sweden                   | 76.00  | 47.00  | 31.00 | 154.00 | 3.81 | 3.21 | 0.44 | 2.40 | 13.24 | 17524559.99  | 4.33 | 3.85 | 3.43 | 5.04 |
| Switzerland              | 46.00  | 28.00  | 19.00 | 106.00 | 4.17 | 5.37 | 1.56 | 2.49 | 12.98 | 22555188.14  | 3.83 | 3.33 | 2.94 | 4.66 |
| Syria                    | 10.00  | 4.00   | 4.00  | 15.00  | NA   | 4.60 | 2.87 | NA   | 16.70 | 1885.47      | 2.30 | 1.39 | 1.39 | 2.71 |
| Taiwan                   | 131.00 | 85.00  | 57.00 | 239.00 | NA   | NA   | NA   | NA   | NA    | NA           | 4.88 | 4.44 | 4.04 | 5.48 |
| Tajikistan               | 4.00   | 3.00   | 3.00  | 9.00   | 2.75 | 4.16 | 1.11 | 1.93 | 14.86 | 8257.31      | 1.39 | 1.10 | 1.10 | 2.20 |
| Tanzania                 | 34.00  | 23.00  | 24.00 | 53.00  | 2.98 | 4.17 | 3.11 | 1.81 | 15.56 | 168477.48    | 3.53 | 3.14 | 3.18 | 3.97 |
| Thailand                 | 117.00 | 69.00  | 49.00 | 208.00 | 4.22 | 4.91 | 3.27 | 1.34 | 10.69 | 3345757.22   | 4.76 | 4.23 | 3.89 | 5.34 |
| Togo                     | 14.00  | 9.00   | 11.00 | 17.00  | 3.70 | 4.97 | 3.29 | 1.89 | 14.32 | 10343.83     | 2.64 | 2.20 | 2.40 | 2.83 |
| Tonga                    | 1.00   | NA     | 1.00  | 3.00   | 3.06 | 5.01 | NA   | 1.77 | 7.12  | NA           | 0.00 | NA   | 0.00 | 1.10 |
| Trinidad And Tobago      | 20.00  | 14.00  | 16.00 | 24.00  | NA   | 5.59 | 3.25 | 1.79 | NA    | 20128.32     | 3.00 | 2.64 | 2.77 | 3.18 |
| Tunisia                  | 37.00  | 26.00  | 21.00 | 62.00  | 3.78 | 4.31 | 2.96 | 1.90 | 15.73 | 223966.94    | 3.61 | 3.26 | 3.04 | 4.13 |
| Turkey                   | 64.00  | 46.00  | 30.00 | 140.00 | 3.21 | 4.65 | 2.39 | 1.41 | 17.23 | 6183818.97   | 4.16 | 3.83 | 3.40 | 4.94 |
| Turkmenistan             | 4.00   | 2.00   | 2.00  | 6.00   | NA   | 2.51 | 2.72 | 1.84 | 16.51 | NA           | 1.39 | 0.69 | 0.69 | 1.79 |
| Turks And Caicos Islands | 1.00   | NA     | 1.00  | 1.00   | NA   | 3.62 | NA   | NA   | NA    | NA           | 0.00 | NA   | 0.00 | 0.00 |
| U.S. Virgin Islands      | 1.00   | 1.00   | NA    | 2.00   | 3.71 | 5.73 | 3.25 | NA   | NA    | NA           | 0.00 | 0.00 | NA   | 0.69 |
| Uganda                   | 43.00  | 26.00  | 32.00 | 72.00  | 2.92 | 5.36 | 3.12 | 1.99 | 15.06 | 32695.32     | 3.76 | 3.26 | 3.47 | 4.28 |
| Ukraine                  | 16.00  | 9.00   | 7.00  | 66.00  | 3.87 | 4.35 | 2.11 | 1.81 | 13.68 | 502981.20    | 2.77 | 2.20 | 1.95 | 4.19 |
| United Arab Emirates     | 7.00   | 5.00   | 4.00  | 12.00  | 4.61 | 4.72 | 3.29 | 1.25 | 14.43 | 3443051.77   | 1.95 | 1.61 | 1.39 | 2.48 |
| United Kingdom           | 222.00 | 131.00 | 71.00 | 502.00 | 3.42 | 5.61 | 2.12 | 2.29 | 17.25 | 45469333.33  | 5.40 | 4.88 | 4.26 | 6.22 |
| United States            | 288.00 | 190.00 | 94.00 | 858.00 | 2.48 | 3.57 | 1.91 | 2.82 | 15.46 | 543249000.00 | 5.66 | 5.25 | 4.54 | 6.75 |

|                                               |       |       |       |       |      |      |      |      |       |            |      |      |      |      |
|-----------------------------------------------|-------|-------|-------|-------|------|------|------|------|-------|------------|------|------|------|------|
| United States<br>Minor<br>Outlying<br>Islands | 10-00 | 7-00  | 8-00  | 10-00 | NA   | NA   | NA   | NA   | NA    | NA         | 2-30 | 1-95 | 2-08 | 2-30 |
| Uruguay                                       | 27-00 | 16-00 | 14-00 | 40-00 | 3-07 | 2-98 | 2-87 | 2-22 | 15-82 | 226324-97  | 3-30 | 2-77 | 2-64 | 3-69 |
| Uzbekistan                                    | 7-00  | 4-00  | 6-00  | 11-00 | 3-35 | 4-33 | 2-53 | 1-82 | 16-18 | 92090-21   | 1-95 | 1-39 | 1-79 | 2-40 |
| Vanuatu                                       | 3-00  | NA    | 3-00  | 5-00  | 3-88 | 3-12 | 3-17 | 1-25 | 5-55  | NA         | 1-10 | NA   | 1-10 | 1-61 |
| Venezuela                                     | 41-00 | 24-00 | 23-00 | 66-00 | 2-82 | 3-59 | 3-23 | 1-16 | 13-31 | 2827211-88 | 3-71 | 3-18 | 3-14 | 4-19 |
| Vietnam                                       | 53-00 | 27-00 | 25-00 | 85-00 | 4-62 | 5-73 | 3-18 | 1-74 | NA    | 1178742-78 | 3-97 | 3-30 | 3-22 | 4-44 |
| Wallis And<br>Futuna                          | 1-00  | 1-00  | NA    | 2-00  | NA   | NA   | NA   | NA   | NA    | NA         | 0-00 | 0-00 | NA   | 0-69 |
| Yemen                                         | 6-00  | 3-00  | 5-00  | 10-00 | 1-27 | 3-98 | 3-14 | 1-79 | 16-07 | NA         | 1-79 | 1-10 | 1-61 | 2-30 |
| Zambia                                        | 18-00 | 12-00 | 13-00 | 26-00 | 3-56 | 3-14 | 3-07 | 1-69 | 12-29 | NA         | 2-89 | 2-48 | 2-56 | 3-26 |
| Zimbabwe                                      | 16-00 | 10-00 | 13-00 | 30-00 | 3-18 | 3-75 | 3-05 | 2-33 | 12-80 | NA         | 2-77 | 2-30 | 2-56 | 3-40 |
| Channel<br>Islands                            | NA    | NA    | NA    | NA    | NA   | 6-77 | NA   | NA   | NA    | NA         | NA   | NA   | NA   | NA   |



## Results

**Table S5. Summary of country-specific predictor and response variables used in this study**

| Variable Name                     | Mean      | Standard Deviation | Min     | First Quartile | Median    | Third Quartile | Max         | n used | n missing |
|-----------------------------------|-----------|--------------------|---------|----------------|-----------|----------------|-------------|--------|-----------|
| Agri land percent                 | 39.16     | 21.87              | 0.57    | 21.84          | 39.97     | 55.08          | 82.56       | 189.0  | 1.00      |
| Land area                         | 683751.72 | 1862495.90         | 160.00  | 25220.00       | 120410.00 | 527970.00      | 16376870.00 | 189.0  | 1.00      |
| Mean annual precipitation         | 1106.81   | 779.48             | 32.91   | 524.70         | 990.90    | 1613.07        | 3268.27     | 168.0  | 22.00     |
| HDI rank                          | 94.89     | 55.02              | 1.00    | 47.00          | 94.50     | 143.00         | 189.00      | 186.0  | 4.00      |
| HDI value                         | 0.71      | 0.15               | 0.35    | 0.59           | 0.74      | 0.83           | 0.95        | 186.0  | 4.00      |
| Life expectancy                   | 72.03     | 7.73               | 52.20   | 66.60          | 73.70     | 77.40          | 84.10       | 188.0  | 2.00      |
| Expected years schooling          | 13.24     | 2.95               | 4.90    | 11.40          | 13.20     | 15.20          | 22.90       | 187.0  | 3.00      |
| Mean years schooling              | 8.52      | 3.11               | 1.50    | 6.20           | 8.75      | 11.20          | 14.10       | 186.0  | 4.00      |
| GNI minus HDI rank                | 0.54      | 17.14              | -80.00  | -10.00         | 3.00      | 13.00          | 43.00       | 180.0  | 10.00     |
| Human population                  | 39.64     | 144.69             | 0.00    | 2.10           | 8.90      | 29.30          | 1386.40     | 189.0  | 1.00      |
| Average population growth percent | 1.49      | 1.36               | -1.30   | 0.60           | 1.30      | 2.30           | 8.80        | 189.0  | 1.00      |
| GDP percent growth                | 3.04      | 4.39               | -34.30  | 1.80           | 3.20      | 4.60           | 26.70       | 184.0  | 6.00      |
| GDP per capita percent growth     | 1.88      | 5.34               | -35.90  | 0.40           | 1.95      | 3.70           | 40.70       | 184.0  | 6.00      |
| Latitude                          | 18.25     | 24.32              | -41.29  | 3.75           | 15.55     | 38.90          | 64.14       | 189.0  | 1.00      |
| Longitude                         | 18.17     | 66.13              | -175.20 | -13.23         | 19.04     | 47.54          | 178.44      | 189.0  | 1.00      |

|                                          |                     |                      |                |                  |                   |                    |                       |                |                 |
|------------------------------------------|---------------------|----------------------|----------------|------------------|-------------------|--------------------|-----------------------|----------------|-----------------|
| Buffalo population                       | 4394135.33          | 17693875.56          | 26.00          | 3719.00          | 120627.00         | 908055.00          | 112751266.00          | 43.00          | 147.00          |
| Duck population National diversity index | 25865997.09<br>0.55 | 205472892.30<br>0.16 | 281.00<br>0.11 | 58202.00<br>0.44 | 387260.00<br>0.55 | 2451127.00<br>0.65 | 1950801879.00<br>1.00 | 90.00<br>156.0 | 100.00<br>34.00 |
| Number poor                              | 12957.13            | 39306.74             | 3.00           | 298.00           | 2994.00           | 10217.00           | 364225.00             | 103.0          | 87.00           |
| Exports percent GDP                      | 41.75               | 30.43                | 2.28           | 23.79            | 35.45             | 49.57              | 230.02                | 180.0          | 10.00           |
| Imports percent GDP                      | 48.67               | 26.76                | 11.50          | 31.59            | 43.57             | 59.51              | 193.97                | 183.0          | 7.00            |
| Food imports percent                     | 15.36               | 8.42                 | 4.04           | 10.03            | 13.85             | 18.37              | 50.69                 | 173.0          | 17.00           |
| Food exports percent                     | 26.63               | 25.33                | 0.00           | 7.52             | 17.64             | 38.92              | 98.66                 | 174.0          | 16.00           |
| Average precipitation                    | 1141.96             | 791.21               | 51.00          | 560.00           | 1023.00           | 1651.00            | 3240.00               | 184.0          | 6.00            |
| Forest area percent                      | 32.31               | 23.85                | 0.00           | 10.98            | 32.40             | 48.22              | 98.28                 | 188.0          | 2.00            |
| Human population density                 | 232.25              | 790.86               | 1.98           | 35.61            | 82.81             | 205.86             | 7915.73               | 189.0          | 1.00            |
| Mean annual temperature average          | 18.11               | 8.43                 | -7.14          | 10.18            | 21.58             | 25.05              | 28.30                 | 168.0          | 22.00           |
| GDP value                                | 388000000000.0      | 1610000000000.0      | 145000000.0    | 8100000000.0     | 33200000000.0     | 192000000000.0     | 1790000000000.0       | 187.0          | 3.00            |
| GDP per capita                           | 13180.87            | 20027.34             | 276.00         | 1579.00          | 4916.00           | 14903.00           | 149165.00             | 187.0          | 3.00            |
| National income per capita               | 18195.45            | 19735.48             | 663.00         | 3677.00          | 11213.00          | 26077.00           | 116818.00             | 186.0          | 4.00            |
| Health expenditure percent GDP           | 6.70                | 2.68                 | 2.50           | 4.80             | 6.30              | 8.20               | 18.30                 | 181.0          | 9.00            |
| Health expenditure per capita            | 1000.14             | 1694.94              | 16.60          | 81.70            | 301.20            | 973.00             | 9818.00               | 181.0          | 9.00            |
| Physicians per 1000 people               | 1.72                | 1.53                 | 0.00           | 0.20             | 1.50              | 3.00               | 7.50                  | 169.0          | 21.00           |

|                                       |              |              |          |            |             |             |               |            |       |
|---------------------------------------|--------------|--------------|----------|------------|-------------|-------------|---------------|------------|-------|
| Nurses<br>midwives per<br>1000 people | 4.14         | 3.99         | 0.10     | 1.00       | 2.80        | 6.00        | 18.20         | 168.0<br>0 | 22.00 |
| Prevalence<br>undernourishme<br>nt    | 11.53        | 11.68        | 3.00     | 3.00       | 7.00        | 15.00       | 62.00         | 161.0<br>0 | 29.00 |
| Death rate per<br>1000 people         | 7.81         | 2.67         | 2.00     | 6.00       | 7.00        | 10.00       | 15.00         | 187.0<br>0 | 3.00  |
| Birth rate per<br>1000 people         | 20.95        | 10.19        | 8.00     | 12.00      | 19.00       | 29.00       | 48.00         | 187.0<br>0 | 3.00  |
| Surface area                          | 704.32       | 1938.65      | 0.20     | 27.80      | 131.20      | 549.10      | 17098.30      | 190.0<br>0 | 0.00  |
| Human<br>population<br>density        | 233.24       | 792.88       | 2.00     | 36.00      | 83.00       | 206.00      | 7916.00       | 188.0<br>0 | 2.00  |
| GNI Atlas                             | 424.23       | 1754.05      | 0.30     | 8.80       | 36.50       | 204.00      | 18980.30      | 181.0<br>0 | 9.00  |
| GNI per capita<br>Atlas               | 12611.99     | 16992.97     | 290.00   | 1790.00    | 4940.00     | 15200.00    | 80560.00      | 181.0<br>0 | 9.00  |
| Cattle<br>population                  | 8475386.16   | 26654647.84  | 300.00   | 380226.00  | 1721906.00  | 5587719.00  | 212926047.00  | 167.0<br>0 | 23.00 |
| Chicken<br>population                 | 120501454.20 | 399374636.10 | 12000.00 | 5937753.00 | 19943642.00 | 68489203.00 | 3907334138.00 | 139.0<br>0 | 51.00 |
| Goat population                       | 5765130.43   | 20844782.13  | 128.00   | 84352.00   | 705527.00   | 2875820.00  | 190964383.00  | 155.0<br>0 | 35.00 |
| Horse<br>population                   | 310686.86    | 840480.02    | 71.00    | 12843.00   | 60156.00    | 263795.00   | 6046000.00    | 127.0<br>0 | 63.00 |
| Pig population                        | 6959551.88   | 43648595.71  | 694.00   | 77841.00   | 480695.00   | 2603364.00  | 510417525.00  | 139.0<br>0 | 51.00 |
| Sheep<br>population                   | 6714100.09   | 17816189.56  | 249.00   | 131923.00  | 868752.00   | 6287562.00  | 173900001.00  | 160.0<br>0 | 30.00 |
| National rainfall<br>index            | 1127.52      | 797.04       | 23.44    | 543.30     | 1005.00     | 1578.00     | 3564.00       | 159.0<br>0 | 31.00 |
| Poverty index                         | 0.16         | 0.16         | 0.00     | 0.02       | 0.13        | 0.26        | 0.59          | 103.0<br>0 | 87.00 |
| Poverty<br>headcount<br>percent       | 31.16        | 27.65        | 0.19     | 4.49       | 28.92       | 51.95       | 91.92         | 103.0<br>0 | 87.00 |

|                     |          |          |      |        |         |          |           |       |       |
|---------------------|----------|----------|------|--------|---------|----------|-----------|-------|-------|
| Number poor         | 12957.13 | 39306.74 | 3.00 | 298.00 | 2994.00 | 10217.00 | 364225.00 | 103.0 | 87.00 |
| Human microbe       | 35.22    | 51.20    | 1.00 | 6.00   | 17.00   | 43.00    | 297.00    | 0     | 3.00  |
| Zoonotic<br>microbe | 23.05    | 33.22    | 1.00 | 4.00   | 11.00   | 29.00    | 190.00    | 0     | 16.00 |
| Emerging<br>microbe | 17.24    | 17.74    | 1.00 | 5.00   | 11.00   | 24.00    | 94.00     | 0     | 6.00  |
| Total microbe       | 70.78    | 126.90   | 1.00 | 10.00  | 26.00   | 69.00    | 858.00    | 0     | 0.00  |

---

**Table S6. Summary statistics of log-transformed variables used in the study.**

| <b>Variable Name</b>                | <b>Mean</b> | <b>Standard Deviation</b> | <b>Min</b> | <b>First Quartile</b> | <b>Median</b> | <b>Third Quartile</b> | <b>Max</b> | <b>n used</b> | <b>n missing</b> |
|-------------------------------------|-------------|---------------------------|------------|-----------------------|---------------|-----------------------|------------|---------------|------------------|
| Log land area                       | 4.95        | 1.10                      | 2.20       | 4.40                  | 5.08          | 5.72                  | 7.21       | 189.00        | 1.00             |
| Log number poor                     | 3.21        | 1.10                      | 0.48       | 2.47                  | 3.48          | 4.01                  | 5.56       | 103.00        | 87.00            |
| Log exports percent GDP             | 3.52        | 0.67                      | 0.83       | 3.17                  | 3.57          | 3.90                  | 5.44       | 180.00        | 10.00            |
| Log imports percent GDP             | 3.76        | 0.51                      | 2.44       | 3.45                  | 3.77          | 4.09                  | 5.27       | 183.00        | 7.00             |
| Log food imports percent            | 2.61        | 0.50                      | 1.40       | 2.31                  | 2.63          | 2.91                  | 3.93       | 173.00        | 17.00            |
| Log food exports percent            | 2.52        | 1.79                      | -7.36      | 2.02                  | 2.87          | 3.66                  | 4.59       | 174.00        | 16.00            |
| Log average precipitation           | 6.71        | 0.94                      | 3.93       | 6.33                  | 6.93          | 7.41                  | 8.08       | 184.00        | 6.00             |
| Log forest area percent             | 2.91        | 1.51                      | -5.04      | 2.41                  | 3.49          | 3.88                  | 4.59       | 187.00        | 3.00             |
| Log human population density        | 4.34        | 1.39                      | 0.68       | 3.57                  | 4.42          | 5.33                  | 8.98       | 189.00        | 1.00             |
| Log mean annual temperature average | 2.76        | 0.68                      | -0.29      | 2.34                  | 3.09          | 3.22                  | 3.34       | 165.00        | 25.00            |
| Log GDP value                       | 24.26       | 2.29                      | 18.79      | 22.82                 | 24.23         | 25.98                 | 30.52      | 187.00        | 3.00             |
| Log GDP per capita_                 | 8.54        | 1.45                      | 5.62       | 7.36                  | 8.50          | 9.61                  | 11.91      | 187.00        | 3.00             |
| Log national income per capita      | 9.20        | 1.21                      | 6.50       | 8.21                  | 9.32          | 10.17                 | 11.67      | 186.00        | 4.00             |
| Log health expenditure percent GDP  | 1.82        | 0.40                      | 0.92       | 1.57                  | 1.84          | 2.10                  | 2.91       | 181.00        | 9.00             |
| Log health expenditure per capita   | 5.76        | 1.58                      | 2.81       | 4.40                  | 5.71          | 6.88                  | 9.19       | 181.00        | 9.00             |
| Log physicians per 1000 people      | 0.04        | 1.29                      | -2.30      | -0.92                 | 0.50          | 1.13                  | 2.01       | 158.00        | 32.00            |
| Log Nurses midwives per 1000 people | 0.86        | 1.20                      | -2.30      | 0.00                  | 1.03          | 1.79                  | 2.90       | 168.00        | 22.00            |
| Log prevalence undernourishment     | 2.03        | 0.89                      | 1.10       | 1.10                  | 1.95          | 2.71                  | 4.13       | 161.00        | 29.00            |
| Log death rate per 1000 people      | 1.99        | 0.36                      | 0.69       | 1.79                  | 1.95          | 2.30                  | 2.71       | 187.00        | 3.00             |
| Log birth rate per 1000 people      | 2.92        | 0.49                      | 2.08       | 2.48                  | 2.94          | 3.37                  | 3.87       | 187.00        | 3.00             |
| Log surface area                    | 4.52        | 2.53                      | -1.61      | 3.33                  | 4.88          | 6.31                  | 9.75       | 190.00        | 0.00             |
| Log human population density        | 4.35        | 1.39                      | 0.69       | 3.58                  | 4.42          | 5.33                  | 8.98       | 188.00        | 2.00             |
| Log GNI Atlas                       | 3.61        | 2.30                      | -1.20      | 2.17                  | 3.60          | 5.32                  | 9.85       | 181.00        | 9.00             |
| Log GNI per capita Atlas            | 8.55        | 1.43                      | 5.67       | 7.49                  | 8.51          | 9.63                  | 11.30      | 181.00        | 9.00             |
| Log cattle                          | 13.99       | 2.44                      | 5.70       | 12.85                 | 14.36         | 15.54                 | 19.18      | 167.00        | 23.00            |
| Log chicken                         | 16.62       | 2.30                      | 9.39       | 15.60                 | 16.81         | 18.04                 | 22.09      | 139.00        | 51.00            |
| Log goat                            | 12.97       | 2.79                      | 4.85       | 11.34                 | 13.47         | 14.87                 | 19.07      | 155.00        | 35.00            |
| Log horse                           | 10.78       | 2.24                      | 4.26       | 9.46                  | 11.00         | 12.48                 | 15.61      | 127.00        | 63.00            |
| Log pig                             | 13.06       | 2.50                      | 6.54       | 11.26                 | 13.08         | 14.77                 | 20.05      | 139.00        | 51.00            |
| Log sheep                           | 13.41       | 2.78                      | 5.52       | 11.79                 | 13.67         | 15.65                 | 18.97      | 160.00        | 30.00            |
| Log national rainfall index         | 6.70        | 0.95                      | 3.15       | 6.30                  | 6.91          | 7.36                  | 8.18       | 159.00        | 31.00            |
| Log poverty index                   | -2.74       | 1.73                      | -6.91      | -4.02                 | -2.02         | -1.34                 | -0.53      | 103.00        | 87.00            |

|                               |      |      |       |      |      |      |       |        |       |
|-------------------------------|------|------|-------|------|------|------|-------|--------|-------|
| Log poverty headcount percent | 2.66 | 1.59 | -1.66 | 1.50 | 3.36 | 3.95 | 4.52  | 103.00 | 87.00 |
| Log number poor               | 7.39 | 2.53 | 1.10  | 5.70 | 8.00 | 9.23 | 12.81 | 103.00 | 87.00 |
| Log human microbe             | 2.73 | 1.38 | 0.00  | 1.79 | 2.83 | 3.76 | 5.69  | 187.00 | 3.00  |
| Log zoonotic microbe          | 2.34 | 1.31 | 0.00  | 1.39 | 2.40 | 3.37 | 5.25  | 174.00 | 16.00 |
| Log emerging microbe          | 2.30 | 1.15 | 0.00  | 1.61 | 2.40 | 3.18 | 4.54  | 184.00 | 6.00  |
| Log total microbe             | 3.25 | 1.45 | 0.00  | 2.30 | 3.26 | 4.23 | 6.75  | 190.00 | 0.00  |

---

## Zoonotic pathogen diversity

**Table S7. Univariable analysis (outcome: logarithm of zoonotic pathogen count; original data)**

| Variable Name                           | edf  | Ref. df | F      | p-value | Adjusted R-squared | deviance explained (%) | GCV  | scale est. | n      |
|-----------------------------------------|------|---------|--------|---------|--------------------|------------------------|------|------------|--------|
| <b>Non-parametric coefficients</b>      |      |         |        |         |                    |                        |      |            |        |
| s (HDI rank)                            | 1.98 | 2.47    | 15.85  | <0.01   | 0.18               | 0.19                   | 1.42 | 1.40       | 171.00 |
| s (HDI value)                           | 2.31 | 2.89    | 13.79  | <0.01   | 0.19               | 0.20                   | 1.42 | 1.39       | 171.00 |
| s (life expectancy)                     | 2.68 | 3.35    | 12.61  | <0.01   | 0.20               | 0.21                   | 1.42 | 1.39       | 173.00 |
| s (expected years schooling)            | 6.08 | 7.24    | 8.87   | <0.01   | 0.26               | 0.29                   | 1.33 | 1.28       | 172.00 |
| s (mean years schooling)                | 4.41 | 5.46    | 4.96   | <0.01   | 0.13               | 0.15                   | 1.53 | 1.49       | 171.00 |
| s(duck)                                 | 5.73 | 6.57    | 4.39   | <0.01   | 0.22               | 0.27                   | 1.22 | 1.13       | 88.00  |
| s (NDI)                                 | 6.41 | 7.56    | 2.65   | 0.01    | 0.10               | 0.14                   | 1.49 | 1.42       | 153.00 |
| s (forest area %)                       | 5.21 | 6.30    | 1.85   | 0.09    | 0.05               | 0.08                   | 1.68 | 1.62       | 172.00 |
| s(NRI)                                  | 2.80 | 3.50    | 2.18   | 0.08    | 0.04               | 0.06                   | 1.55 | 1.51       | 157.00 |
| s (human population)                    | 4.87 | 5.87    | 22.33  | <0.01   | 0.43               | 0.45                   | 1.00 | 0.96       | 173.00 |
| <b>Log-transformed variables</b>        |      |         |        |         |                    |                        |      |            |        |
| s (log exports % GDP)                   | 4.71 | 5.78    | 3.05   | 0.01    | 0.09               | 0.12                   | 1.54 | 1.49       | 166.00 |
| s (log imports % GDP)                   | 2.67 | 3.39    | 13.35  | <0.01   | 0.21               | 0.23                   | 1.34 | 1.31       | 169.00 |
| s (log food exports %)                  | 3.17 | 3.92    | 6.17   | <0.01   | 0.13               | 0.15                   | 1.52 | 1.48       | 160.00 |
| s (log GDP value)                       | 2.51 | 3.19    | 120.80 | <0.01   | 0.69               | 0.70                   | 0.53 | 0.52       | 172.00 |
| s (log GDP per capita)                  | 7.31 | 8.32    | 7.29   | <0.01   | 0.25               | 0.28                   | 1.34 | 1.27       | 172.00 |
| s (log national income per capita)      | 5.96 | 7.13    | 6.70   | <0.01   | 0.21               | 0.24                   | 1.41 | 1.35       | 171.00 |
| s (log health expenditure per capita)   | 2.74 | 3.43    | 12.75  | <0.01   | 0.21               | 0.22                   | 1.39 | 1.36       | 166.00 |
| s (log Nurses midwives per 1000 people) | 2.33 | 2.94    | 4.30   | 0.01    | 0.07               | 0.08                   | 1.51 | 1.47       | 160.00 |
| s (log surface area)                    | 4.01 | 4.97    | 12.84  | <0.01   | 0.26               | 0.28                   | 1.30 | 1.27       | 174.00 |
| s (log human population density)        | 1.00 | 1.00    | 2.00   | 0.16    | 0.01               | 0.01                   | 1.72 | 1.70       | 173.00 |
| s (log GNI Atlas)                       | 2.51 | 3.19    | 120.30 | <0.01   | 0.70               | 0.70                   | 0.52 | 0.51       | 167.00 |
| s (log GNI per capita Atlas)            | 7.07 | 8.13    | 6.23   | <0.01   | 0.22               | 0.25                   | 1.37 | 1.31       | 167.00 |
| s (log cattle)                          | 2.29 | 2.93    | 33.28  | <0.01   | 0.38               | 0.39                   | 1.03 | 1.01       | 161.00 |
| s (log goat)                            | 3.19 | 4.02    | 3.93   | <0.01   | 0.09               | 0.11                   | 1.49 | 1.45       | 151.00 |
| s (log pig)                             | 2.85 | 3.63    | 43.59  | <0.01   | 0.54               | 0.55                   | 0.79 | 0.76       | 135.00 |
| s (log sheep)                           | 4.07 | 5.10    | 7.49   | <0.01   | 0.20               | 0.22                   | 1.33 | 1.29       | 155.00 |
| s (log land area)                       | 4.00 | 4.96    | 13.11  | <0.01   | 0.27               | 0.28                   | 1.29 | 1.25       | 173.00 |
| <b>Parametric coefficients</b>          |      |         |        |         |                    |                        |      |            |        |

| Variable Name                       | estimate | std. error | t-value | pr (>t) - value | Adjusted R-squared | deviance explained (%) | GCV   | scale est. | n       |
|-------------------------------------|----------|------------|---------|-----------------|--------------------|------------------------|-------|------------|---------|
| Agri land %                         | -0.002   | 0.005      | -0.484  | 0.629           | -0.004             | 0.001                  | 1.739 | 1.719      | 173.000 |
| Mean annual precipitation           | 0.000    | 0.000      | -0.588  | 0.558           | -0.004             | 0.002                  | 1.669 | 1.649      | 164.000 |
| GNI minus HDI rank                  | 0.006    | 0.006      | 1.011   | 0.313           | 0.000              | 0.006                  | 1.740 | 1.719      | 165.000 |
| Average population growth percent   | -0.156   | 0.072      | -2.181  | 0.031           | 0.021              | 0.027                  | 1.679 | 1.659      | 173.000 |
| GDP percent growth                  | 0.028    | 0.022      | 1.249   | 0.213           | 0.003              | 0.009                  | 1.680 | 1.660      | 168.000 |
| GDP per capita percent growth       | 0.042    | 0.018      | 2.378   | 0.019           | 0.027              | 0.033                  | 1.640 | 1.621      | 168.000 |
| latitude                            | 0.008    | 0.004      | 2.046   | 0.042           | 0.018              | 0.024                  | 1.711 | 1.691      | 173.000 |
| buffalo                             | 0.000    | 0.000      | 1.686   | 0.099           | 0.042              | 0.065                  | 1.747 | 1.666      | 43.000  |
| Average precipitation               | 0.000    | 0.000      | -0.280  | 0.780           | -0.005             | 0.000                  | 1.743 | 1.722      | 172.000 |
| Physicians per 1000 people          | 0.217    | 0.063      | 3.423   | 0.001           | 0.063              | 0.069                  | 1.547 | 1.527      | 160.000 |
| Death rate per 1000 people          | 0.008    | 0.038      | 0.226   | 0.821           | -0.006             | 0.000                  | 1.747 | 1.727      | 174.000 |
| Birth rate per 1000 people          | -0.037   | 0.009      | -4.073  | 0.000           | 0.083              | 0.088                  | 1.594 | 1.576      | 174.000 |
| longitude                           | 0.001    | 0.002      | 0.429   | 0.668           | -0.005             | 0.001                  | 1.751 | 1.730      | 173.000 |
| Log number poor                     | 0.281    | 0.042      | 6.629   | 0.000           | 0.305              | 0.312                  | 1.033 | 1.013      | 99.000  |
| Log food imports percent            | -1.451   | 0.177      | -8.179  | 0.000           | 0.294              | 0.299                  | 1.216 | 1.201      | 159.000 |
| Log human population density        | 0.103    | 0.073      | 1.413   | 0.159           | 0.006              | 0.012                  | 1.722 | 1.702      | 173.000 |
| Log mean annual temperature average | -0.222   | 0.146      | -1.518  | 0.131           | 0.008              | 0.014                  | 1.632 | 1.611      | 161.000 |
| Log health expenditure percent GDP  | 0.528    | 0.251      | 2.104   | 0.037           | 0.020              | 0.026                  | 1.694 | 1.674      | 166.000 |
| Log chicken                         | 0.457    | 0.034      | 13.629  | < 0.001         | 0.580              | 0.583                  | 0.692 | 0.681      | 135.000 |
| Log horse                           | 0.267    | 0.048      | 5.614   | 0.000           | 0.199              | 0.205                  | 1.378 | 1.356      | 124.000 |
| Log poverty index                   | 0.043    | 0.070      | 0.609   | 0.544           | -0.006             | 0.004                  | 1.496 | 1.466      | 99.000  |
| Log poverty head count percent      | 0.048    | 0.077      | 0.632   | 0.529           | -0.006             | 0.004                  | 1.495 | 1.465      | 99.000  |
| Log prevalence undernourishment     | -0.504   | 0.108      | -4.665  | 0.000           | 0.119              | 0.125                  | 1.469 | 1.449      | 154.000 |

For each model, edf means equivalent degrees of freedom, the percentage of deviance explained (Dev. %), the generalized cross validation (GCV) score, adjusted R squared and the parameters F and P-value are given. The smoothing functions are referred to as s().



**Table S8. Univariable analysis (outcome: logarithm of zoonotic pathogen count; winsorised data)**

| <b>Non-Parametric coefficients (smoothed terms)</b> |            |               |          |                |                           |                               |            |                   |          |
|-----------------------------------------------------|------------|---------------|----------|----------------|---------------------------|-------------------------------|------------|-------------------|----------|
| <b>Variable Name</b>                                | <b>edf</b> | <b>Ref df</b> | <b>F</b> | <b>p-value</b> | <b>Adjusted R-squared</b> | <b>deviance explained (%)</b> | <b>GCV</b> | <b>scale est.</b> | <b>n</b> |
| s (HDI rank)                                        | 1.99       | 2.47          | 15.79    | <0.01          | 0.18                      | 0.19                          | 1.35       | 1.32              | 171      |
| s (HDI value)                                       | 2.28       | 2.82          | 14.09    | <0.01          | 0.19                      | 0.20                          | 1.35       | 1.32              | 171      |
| s (Life expectancy)                                 | 2.72       | 3.35          | 12.72    | <0.01          | 0.20                      | 0.21                          | 1.34       | 1.32              | 173      |
| s (expected years schooling)                        | 2.28       | 2.83          | 20.20    | <0.01          | 0.25                      | 0.26                          | 1.26       | 1.23              | 172      |
| s (mean years schooling)                            | 4.18       | 5.12          | 4.58     | <0.01          | 0.11                      | 0.14                          | 1.48       | 1.44              | 171      |
| s (GNI minus HDI rank)                              | 2.74       | 3.41          | 2.46     | 0.05           | 0.04                      | 0.06                          | 1.59       | 1.55              | 165      |
| s (GDP percent growth)                              | 3.27       | 4.01          | 1.93     | 0.11           | 0.04                      | 0.06                          | 1.56       | 1.52              | 168      |
| s (duck)                                            | 3.19       | 3.89          | 6.49     | <0.01          | 0.21                      | 0.24                          | 1.10       | 1.05              | 88       |
| s (NDI)                                             | 2.68       | 3.31          | 4.00     | 0.01           | 0.08                      | 0.09                          | 1.40       | 1.37              | 153      |
| s (average precipitation)                           | 3.12       | 3.85          | 1.53     | 0.20           | 0.03                      | 0.04                          | 1.62       | 1.58              | 172      |
| s (forest area percent)                             | 6.71       | 7.80          | 1.76     | 0.08           | 0.06                      | 0.10                          | 1.60       | 1.52              | 172      |
| s (birth rate per 1000 people)                      | 2.71       | 3.35          | 6.55     | <0.01          | 0.11                      | 0.12                          | 1.48       | 1.45              | 174      |
| s(NRI)                                              | 2.47       | 3.06          | 2.39     | 0.07           | 0.04                      | 0.06                          | 1.45       | 1.42              | 157      |
| s (human population)                                | 6.58       | 7.65          | 20.31    | <0.01          | 0.47                      | 0.49                          | 0.89       | 0.85              | 173      |
| <b>Log-transformed variables</b>                    |            |               |          |                |                           |                               |            |                   |          |
| s (log exports percent GDP)                         | 3.16       | 3.90          | 2.03     | 0.09           | 0.04                      | 0.06                          | 1.52       | 1.49              | 166      |
| s (log imports percent GDP)                         | 2.51       | 3.12          | 14.03    | <0.01          | 0.20                      | 0.22                          | 1.28       | 1.25              | 169      |
| s (log food exports percent)                        | 2.57       | 3.17          | 8.00     | <0.01          | 0.14                      | 0.15                          | 1.41       | 1.38              | 160      |
| s (log GDP value)                                   | 2.24       | 2.81          | 128.10   | <0.01          | 0.68                      | 0.68                          | 0.53       | 0.52              | 172      |
| s (log GDP per capita)                              | 6.66       | 7.79          | 5.75     | <0.01          | 0.19                      | 0.22                          | 1.36       | 1.30              | 172      |
| s (log national income per capita)                  | 6.36       | 7.50          | 5.42     | <0.01          | 0.18                      | 0.22                          | 1.38       | 1.32              | 171      |
| s (log health expenditure per capita)               | 2.75       | 3.39          | 12.94    | <0.01          | 0.21                      | 0.22                          | 1.31       | 1.28              | 166      |
| s (log Nurses midwives per 1000 people)             | 6.07       | 7.19          | 3.02     | 0.01           | 0.10                      | 0.14                          | 1.42       | 1.36              | 160      |
| s (log GNI Atlas)                                   | 2.22       | 2.78          | 129.20   | <0.01          | 0.68                      | 0.69                          | 0.51       | 0.50              | 167      |
| s (log GNI per capita Atlas)                        | 4.13       | 5.07          | 8.42     | <0.01          | 0.20                      | 0.22                          | 1.31       | 1.27              | 167      |
| s (log cattle)                                      | 2.08       | 2.60          | 33.94    | <0.01          | 0.35                      | 0.36                          | 1.01       | 0.99              | 161      |
| s (log pig)                                         | 2.65       | 3.28          | 45.98    | <0.01          | 0.53                      | 0.54                          | 0.76       | 0.73              | 135      |
| s (log sheep)                                       | 3.84       | 4.75          | 7.40     | <0.01          | 0.18                      | 0.20                          | 1.27       | 1.23              | 155      |
| s (log number poor)                                 | 8.02       | 8.74          | 7.77     | <0.01          | 0.39                      | 0.44                          | 0.93       | 0.85              | 99       |

For each model, edf means equivalent degrees of freedom, the percentage of deviance explained (Dev. %), the generalized cross validation (GCV) score, adjusted R squared and the parameters F and P-value are given. The smoothing functions are referred to as s(). Explanatory variables used in each model appear in brackets: S.

| <b>Parametric coefficients</b>      |                 |                   |                |                           |                           |                               |            |                   |          |
|-------------------------------------|-----------------|-------------------|----------------|---------------------------|---------------------------|-------------------------------|------------|-------------------|----------|
| <b>Variable Name</b>                | <b>estimate</b> | <b>std. error</b> | <b>t-value</b> | <b>pr (&gt;t) - value</b> | <b>Adjusted R-squared</b> | <b>deviance explained (%)</b> | <b>GCV</b> | <b>scale est.</b> | <b>n</b> |
| Agri land percent                   | -0.003          | 0.005             | -0.573         | 0.567                     | -0.004                    | 0.002                         | 1.647      | 1.628             | 173      |
| Mean annual precipitation           | 0.000           | 0.000             | -0.569         | 0.570                     | -0.004                    | 0.002                         | 1.575      | 1.556             | 164      |
| Average population growth percent   | -0.176          | 0.083             | -2.124         | 0.035                     | 0.020                     | 0.026                         | 1.592      | 1.574             | 173      |
| GDP per capita percent growth       | 0.077           | 0.037             | 2.103          | 0.037                     | 0.020                     | 0.026                         | 1.562      | 1.543             | 168      |
| latitude                            | 0.009           | 0.004             | 2.240          | 0.026                     | 0.023                     | 0.029                         | 1.614      | 1.595             | 173      |
| buffalo                             | 0.000           | 0.000             | 1.627          | 0.111                     | 0.038                     | 0.061                         | 1.554      | 1.482             | 43       |
| Physicians per 1000 people          | 0.236           | 0.066             | 3.568          | <0.001                    | 0.069                     | 0.075                         | 1.449      | 1.431             | 160      |
| Death rate per 1000 people          | 0.010           | 0.040             | 0.253          | 0.800                     | -0.005                    | 0.000                         | 1.656      | 1.637             | 174      |
| longitude                           | 0.000           | 0.002             | 0.278          | 0.781                     | -0.005                    | 0.000                         | 1.660      | 1.641             | 173      |
| Log food imports percent            | -1.598          | 0.189             | -8.448         | <0.001                    | 0.308                     | 0.313                         | 1.126      | 1.112             | 159      |
| Log human population density        | 0.095           | 0.080             | 1.187          | 0.237                     | 0.002                     | 0.008                         | 1.637      | 1.618             | 173      |
| Log mean annual temperature average | -0.296          | 0.182             | -1.625         | 0.106                     | 0.010                     | 0.016                         | 1.533      | 1.514             | 161      |
| Log health expenditure percent GDP  | 0.557           | 0.264             | 2.107          | 0.037                     | 0.020                     | 0.026                         | 1.602      | 1.583             | 166      |
| Log chicken                         | 0.494           | 0.036             | 13.638         | <0.001                    | 0.580                     | 0.583                         | 0.646      | 0.637             | 135      |
| Log goat                            | 0.103           | 0.039             | 2.617          | 0.010                     | 0.038                     | 0.044                         | 1.458      | 1.438             | 151      |
| Log horse                           | 0.275           | 0.050             | 5.491          | <0.001                    | 0.192                     | 0.198                         | 1.297      | 1.276             | 124      |
| Log poverty index                   | 0.041           | 0.072             | 0.574          | 0.568                     | -0.007                    | 0.003                         | 1.421      | 1.393             | 99       |
| Log poverty headcount percent       | 0.043           | 0.079             | 0.542          | 0.589                     | -0.007                    | 0.003                         | 1.422      | 1.393             | 99       |
| Log prevalence undernourishment     | -0.506          | 0.106             | -4.753         | <0.001                    | 0.124                     | 0.129                         | 1.377      | 1.359             | 154      |
| Log land area                       | 0.288           | 0.042             | 6.821          | <0.001                    | 0.209                     | 0.214                         | 1.297      | 1.282             | 173      |
| Log surface area                    | 0.285           | 0.043             | 6.687          | <0.001                    | 0.202                     | 0.206                         | 1.315      | 1.299             | 174      |

**Table S9. Generalized additive model of zoonotic pathogens reported from different countries (original data-uncontrolled research effort)**

| <b>Outcome:</b> Log (number of zoonotic pathogens) |                                          |                   |                |                    |
|----------------------------------------------------|------------------------------------------|-------------------|----------------|--------------------|
| <i>Estimation of Parametric coefficients</i>       |                                          |                   |                |                    |
| <b>Variable</b>                                    | <b>Estimate</b>                          | <b>Std. Error</b> | <b>t value</b> | <b>Pr(&gt; t )</b> |
| Intercept                                          | 0.80                                     | 0.38              | 2.10           | 0.04               |
| Log mean annual temperature (average)              | Variable involved in interaction         |                   |                |                    |
| <i>Approximate significance of smoothed terms</i>  |                                          |                   |                |                    |
| <i>Variable</i>                                    | <i>edf</i>                               | <i>Ref-df</i>     | <i>F</i>       | <i>p-value</i>     |
| s(hdi value)                                       | Variable involved in interaction         |                   |                |                    |
| s(log land area)                                   | Variable involved in interaction         |                   |                |                    |
| s(forest area percentage)                          | 4.04                                     | 4.60              | 4.21           | 0.005              |
| s(log exports percentage of GDP)                   | 3.91                                     | 4.52              | 6.40           | <0.001             |
| s(hdi value):log mean annual temperature (average) | Interaction effects presented in Fig. 1. |                   |                |                    |
| ti(hdi value, log land area)                       | Interaction effects presented in Fig. 1. |                   |                |                    |

Rank: 52/53; R-sq.(adj) = 0.713; Deviance explained = 74.8%; REML = 177.13; Scale est. = 0.46; n = 152; edf : Estimated degrees of freedom; Ref-df: Degrees of freedom before smoothing

**Table S10. Generalized additive model of zoonotic pathogens reported from different countries (winsorised data- uncontrolled research effort)**

| <b>Outcome:</b> Log (number of zoonotic pathogens) |                 |                   |                |                    |
|----------------------------------------------------|-----------------|-------------------|----------------|--------------------|
| <i>Estimation of Parametric coefficients</i>       |                 |                   |                |                    |
| <b>Variable</b>                                    | <b>Estimate</b> | <b>Std. Error</b> | <b>t value</b> | <b>Pr(&gt; t )</b> |
| Intercept                                          | -8.22           | 0.62              | -13.16         | <0.001             |
| Log land area                                      | 0.58            | 0.03              | 16.52          | <0.001             |
| Log human population density                       | 0.51            | 0.05              | 10.74          | <0.001             |
| Log mean annual temperature (average)              | 0.41            | 0.12              | 3.32           | 0.001              |
| National rainfall index                            | 0.0002          | 0.00007           | 3.56           | <0.001             |
| <i>Approximate significance of smoothed terms</i>  |                 |                   |                |                    |
| <i>Variable</i>                                    | <i>edf</i>      | <i>Ref.df</i>     | <i>F</i>       | <i>p-value</i>     |
| s(hdi value)                                       | 3.90            | 4.49              | 38.38          | <0.001             |

R-sq.(adj) = 0.758; Deviance explained = 77.1%; REML = 155.51; Scale est. = 0.35; n = 151; edf: Estimated degrees of freedom; Ref.df: Degrees of freedom before smoothing

Fig. S1. Smoothed curves of the additive effect to the estimated number of zoonotic pathogens (winsorized data–uncontrolled research effort) for the individual environmental and social parameters in the Generalized Additive Model. Shaded areas represent 95% confidence intervals. Plots showing the combined effect of the linear and nonparametric contributions among smoothed terms have been presented.

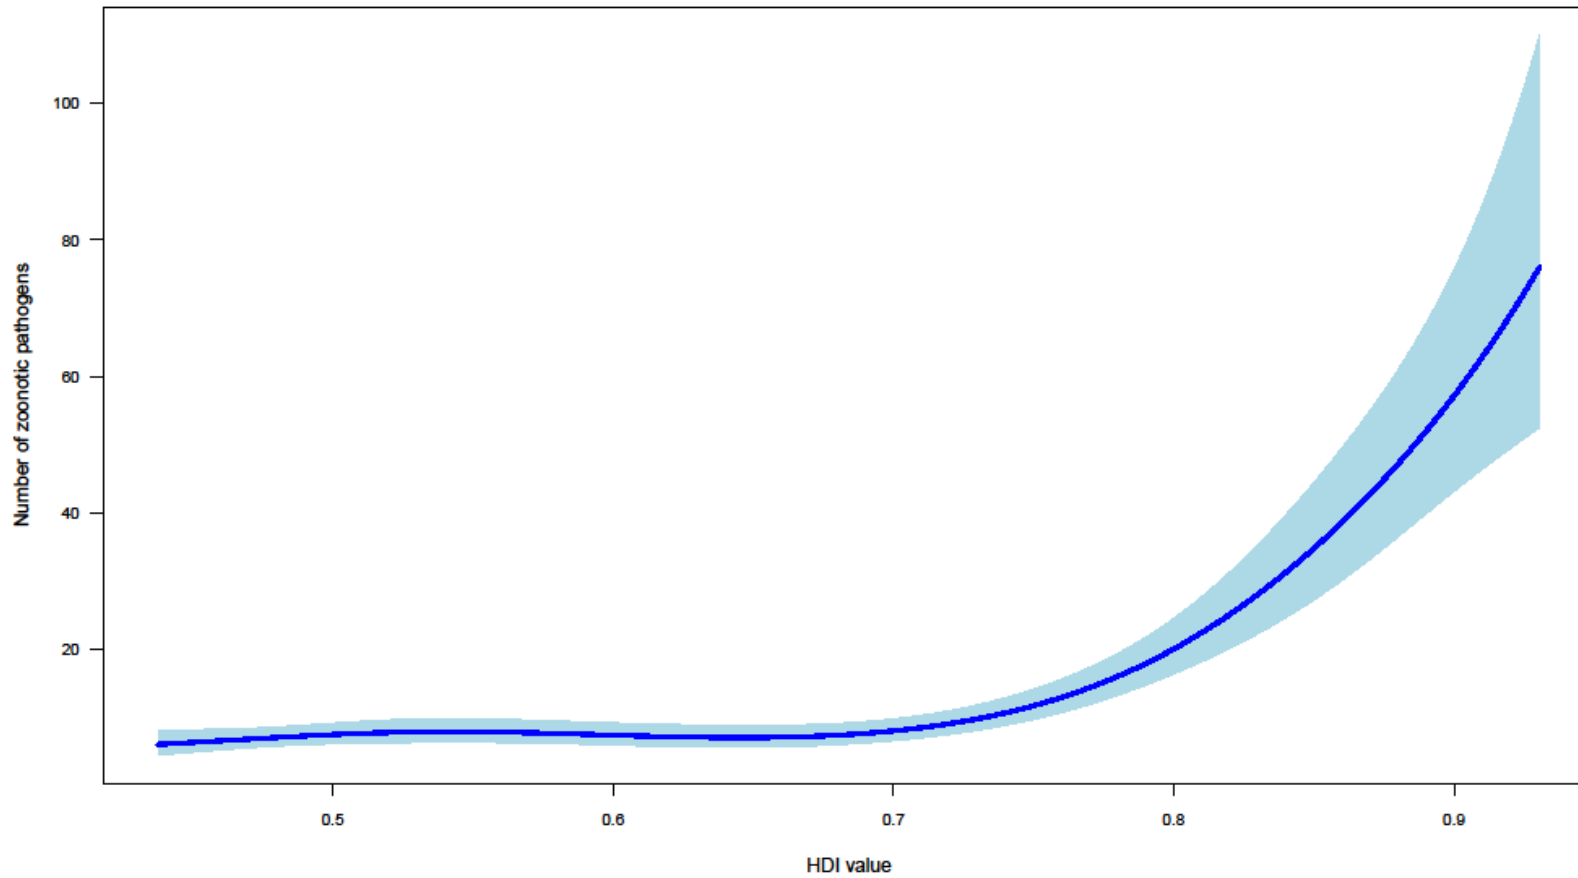

**Table S11. Generalized additive model of zoonotic pathogens reported from different countries (original data - after controlling for the research effort)**

| <b>Outcome:</b> Log (number of zoonotic pathogens) |                 |                   |                |                    |
|----------------------------------------------------|-----------------|-------------------|----------------|--------------------|
| <b>Estimation of Parametric coefficients</b>       |                 |                   |                |                    |
| <b>Variable</b>                                    | <b>Estimate</b> | <b>Std. Error</b> | <b>t value</b> | <b>Pr(&gt; t )</b> |
| Intercept                                          | 2.74            | 0.06              | 46.85          | <0.001             |
| <i>Approximate significance of smoothed terms</i>  |                 |                   |                |                    |
| <i>Variable</i>                                    | <i>edf</i>      | <i>Ref. df</i>    | <i>F</i>       | <i>p-value</i>     |
| s(log gerd usdollar)                               | 3.69            | 4.54              | 26.95          | <0.001             |
| s(log human population density)                    | 1.00            | 1.00              | 21.88          | <0.001             |
| s(log land area)                                   | 1.00            | 1.00              | 55.76          | <0.001             |
| s(forest area percentage)                          | 1.00            | 1.00              | 7.03           | 0.009              |

R-sq.(adj) = 0.76; Deviance explained = 77.3%; -REML = 113.28; Scale est. = 0.38  
n = 111; edf: Estimated degrees of freedom; Ref. df: Degrees of freedom before smoothing

**Table S12. Generalized additive model of zoonotic pathogens reported from different countries (winsorised data – after controlling for the research effort)**

| <b>Outcome:</b> Log (number of zoonotic pathogens) |                 |                   |                |                    |
|----------------------------------------------------|-----------------|-------------------|----------------|--------------------|
| <b>Estimation of Parametric coefficients</b>       |                 |                   |                |                    |
| <b>Variable</b>                                    | <b>Estimate</b> | <b>Std. Error</b> | <b>t value</b> | <b>Pr(&gt; t )</b> |
| Intercept                                          | -8.51           | 0.82              | -10.41         | <0.001             |
| Log land area                                      | 0.56            | 0.06              | 9.42           | <0.001             |
| Log human population density                       | 0.50            | 0.08              | 6.60           | <0.001             |
| Log mean annual temperature (average)              | 0.44            | 0.139             | 3.19           | 0.002              |
| Log GERD in US dollars                             | 0.06            | 0.03              | 1.90           | 0.06               |
| National rainfall index                            | 0.0002          | 0.0001            | 2.35           | 0.02               |
| <b>Approximate significance of smoothed terms</b>  |                 |                   |                |                    |
| <i>Variable</i>                                    | <i>edf</i>      | <i>Ref.df</i>     | <i>F</i>       | <i>p-value</i>     |
| s(hdi value)                                       | 3.48            | 4.14              | 11.05          | <0.001             |
| s(longitude)                                       | 3.14            | 3.81              | 2.81           | 0.03               |

R-sq.(adj) = 0.77; Deviance explained = 79.2%; REML = 107.62; Scale est. = 0.31; n = 101; edf: Estimated degrees of freedom; Ref. df: Degrees of freedom before smoothing

Fig. S2. Smoothed curves of the additive effect to the estimated number of zoonotic pathogens (winsorized data–controlled research effort) for the individual environmental and social parameters in the Generalized Additive Model. Shaded areas represent 95% confidence intervals. Plots showing the combined effect of the linear and nonparametric contributions among smoothed terms have been presented.

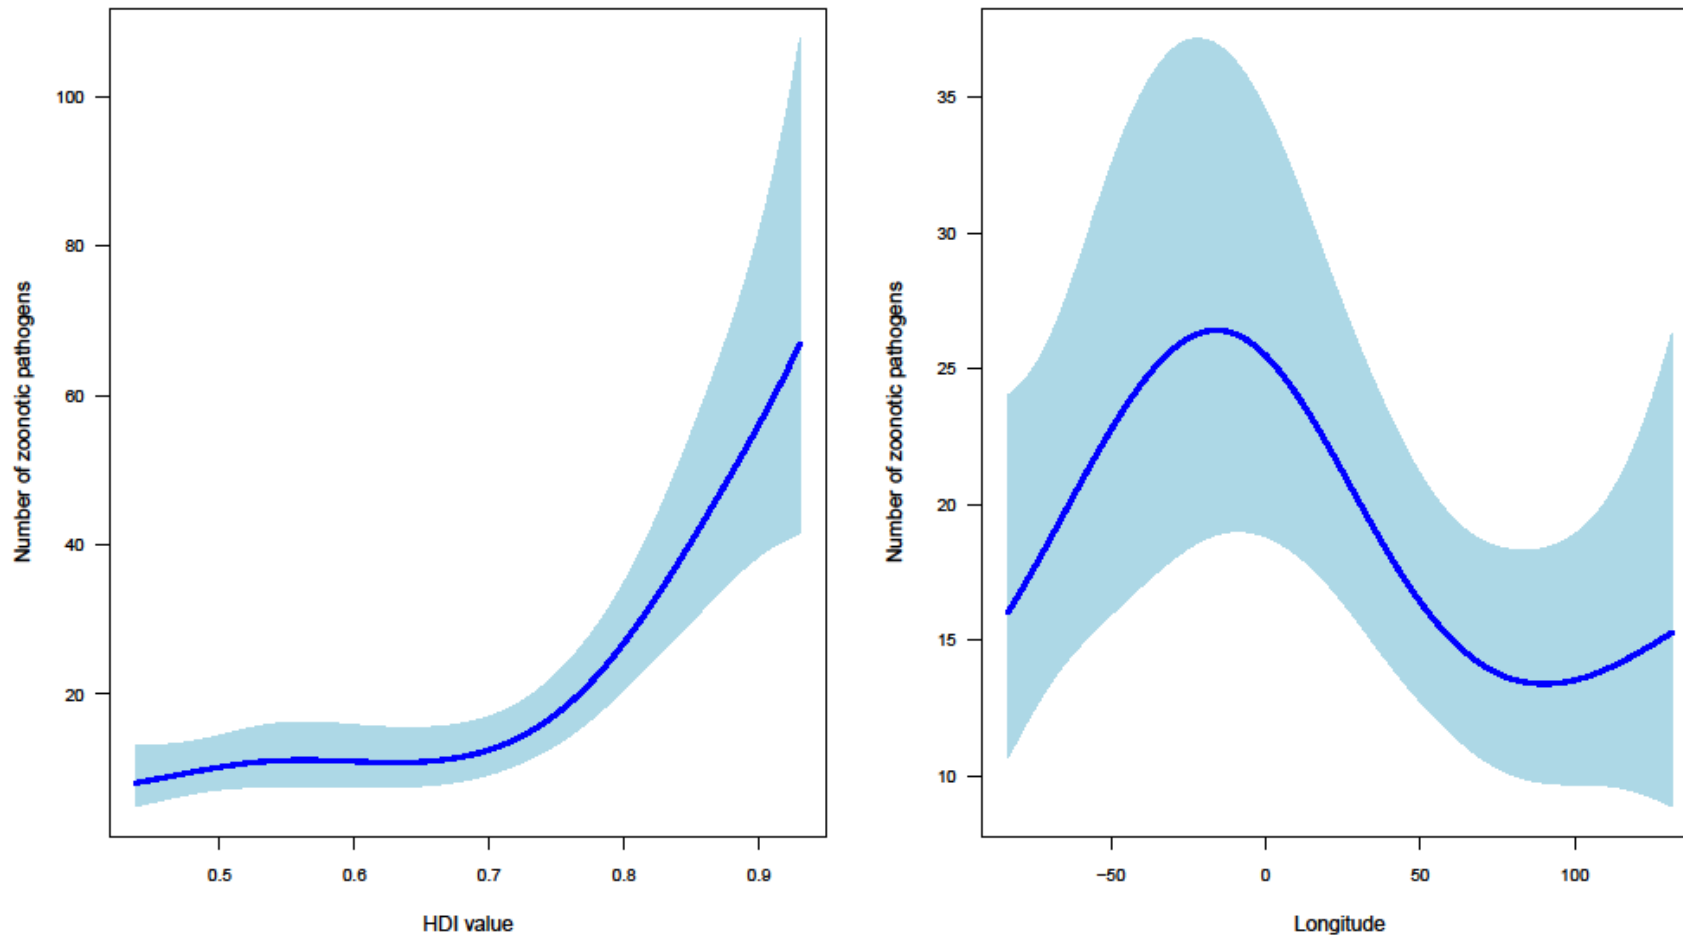



## Emerging pathogen diversity

**Table S13. Univariable analysis (outcome: logarithm of emerging pathogen count; original data)**

| <b>Non-parametric coefficients</b>                                                                                                                                                                                                                                                                                                   |            |                |          |                |                           |                               |            |                   |          |
|--------------------------------------------------------------------------------------------------------------------------------------------------------------------------------------------------------------------------------------------------------------------------------------------------------------------------------------|------------|----------------|----------|----------------|---------------------------|-------------------------------|------------|-------------------|----------|
| <b>Variable Name</b>                                                                                                                                                                                                                                                                                                                 | <b>edf</b> | <b>Ref. df</b> | <b>F</b> | <b>p-value</b> | <b>Adjusted R-squared</b> | <b>deviance explained (%)</b> | <b>GCV</b> | <b>scale est.</b> | <b>n</b> |
| s (HDI rank)                                                                                                                                                                                                                                                                                                                         | 2.59       | 3.22           | 7.84     | <0.01          | 0.12                      | 0.14                          | 1.17       | 1.15              | 180.00   |
| s(HDI value)                                                                                                                                                                                                                                                                                                                         | 3.03       | 3.77           | 7.11     | <0.01          | 0.13                      | 0.14                          | 1.17       | 1.14              | 180.00   |
| s(life expectancy)                                                                                                                                                                                                                                                                                                                   | 3.16       | 3.92           | 6.46     | <0.01          | 0.12                      | 0.14                          | 1.17       | 1.15              | 182.00   |
| s(expected years schooling)                                                                                                                                                                                                                                                                                                          | 5.11       | 6.24           | 6.11     | <0.01          | 0.17                      | 0.19                          | 1.13       | 1.09              | 181.00   |
| s(mean years schooling)                                                                                                                                                                                                                                                                                                              | 3.72       | 4.64           | 3.49     | 0.01           | 0.08                      | 0.10                          | 1.24       | 1.21              | 180.00   |
| s(GNI minus HDI rank)                                                                                                                                                                                                                                                                                                                | 3.26       | 4.13           | 1.81     | 0.13           | 0.04                      | 0.06                          | 1.30       | 1.27              | 174.00   |
| s(duck)                                                                                                                                                                                                                                                                                                                              | 5.48       | 6.30           | 3.83     | <0.01          | 0.19                      | 0.24                          | 0.82       | 0.76              | 89.00    |
| s(NDI)                                                                                                                                                                                                                                                                                                                               | 7.91       | 8.69           | 3.18     | <0.01          | 0.13                      | 0.17                          | 0.92       | 0.87              | 154.00   |
| s(forest area percentage)                                                                                                                                                                                                                                                                                                            | 2.17       | 2.71           | 1.51     | 0.20           | 0.02                      | 0.03                          | 1.31       | 1.29              | 182.00   |
| s(NRI)                                                                                                                                                                                                                                                                                                                               | 2.92       | 3.65           | 3.46     | 0.01           | 0.07                      | 0.09                          | 0.96       | 0.93              | 157.00   |
| s(longitude)                                                                                                                                                                                                                                                                                                                         | 7.06       | 8.09           | 2.80     | 0.01           | 0.10                      | 0.13                          | 1.26       | 1.20              | 183.00   |
| s(human population)                                                                                                                                                                                                                                                                                                                  | 7.30       | 8.22           | 18.53    | <0.001         | 0.45                      | 0.47                          | 0.75       | 0.72              | 183.00   |
| <b>log-transformed variables</b>                                                                                                                                                                                                                                                                                                     |            |                |          |                |                           |                               |            |                   |          |
| s(log exports percent GDP)                                                                                                                                                                                                                                                                                                           | 4.32       | 5.35           | 3.28     | 0.01           | 0.09                      | 0.11                          | 1.16       | 1.12              | 175.00   |
| s (log imports percent GDP)                                                                                                                                                                                                                                                                                                          | 3.19       | 4.02           | 13.45    | 0.00           | 0.23                      | 0.25                          | 0.99       | 0.97              | 178.00   |
| s( log food exports percent)                                                                                                                                                                                                                                                                                                         | 2.50       | 3.11           | 4.00     | 0.01           | 0.07                      | 0.08                          | 1.27       | 1.24              | 169.00   |
| s (log GDP per capita)                                                                                                                                                                                                                                                                                                               | 2.31       | 2.89           | 4.35     | 0.01           | 0.07                      | 0.08                          | 1.23       | 1.21              | 181.00   |
| s (log national income per capita)                                                                                                                                                                                                                                                                                                   | 4.53       | 5.60           | 3.73     | <0.01          | 0.10                      | 0.12                          | 1.22       | 1.18              | 180.00   |
| s (log health expenditure per capita)                                                                                                                                                                                                                                                                                                | 2.45       | 3.06           | 7.14     | <0.01          | 0.11                      | 0.13                          | 1.20       | 1.17              | 176.00   |
| s (log Nurses midwives per 1000 people)                                                                                                                                                                                                                                                                                              | 7.80       | 8.62           | 3.47     | <0.01          | 0.14                      | 0.18                          | 0.99       | 0.94              | 164.00   |
| s (log GNI per capita Atlas)                                                                                                                                                                                                                                                                                                         | 2.63       | 3.28           | 5.58     | <0.01          | 0.09                      | 0.11                          | 1.17       | 1.15              | 176.00   |
| s (log cattle)                                                                                                                                                                                                                                                                                                                       | 2.07       | 2.63           | 45.41    | <0.01          | 0.42                      | 0.43                          | 0.68       | 0.67              | 165.00   |
| s (log pig)                                                                                                                                                                                                                                                                                                                          | 2.42       | 3.09           | 36.26    | <0.01          | 0.45                      | 0.46                          | 0.66       | 0.65              | 137.00   |
| s (log sheep)                                                                                                                                                                                                                                                                                                                        | 4.42       | 5.46           | 8.22     | <0.01          | 0.22                      | 0.24                          | 0.91       | 0.88              | 158.00   |
| For each model, edf means equivalent degrees of freedom, the percentage of deviance explained (Dev. %), the generalized cross validation (GCV) score, adjusted R squared and the parameters F and P-value are given. The smoothing functions are referred to as s(). Explanatory variables used in each model appear in brackets: S- |            |                |          |                |                           |                               |            |                   |          |
| <b>Parametric coefficients</b>                                                                                                                                                                                                                                                                                                       |            |                |          |                |                           |                               |            |                   |          |

| Variable Name                       | estimate | std. error | t-value | pr (>t) - value | Adjusted R-squared | deviance explained (%) | GCV   | scale est. | n   |
|-------------------------------------|----------|------------|---------|-----------------|--------------------|------------------------|-------|------------|-----|
| Agri land percent                   | 0.002    | 0.004      | 0.489   | 0.626           | -0.004             | 0.001                  | 1.336 | 1.322      | 183 |
| Mean annual precipitation           | 0.000    | 0.000      | 0.258   | 0.796           | -0.006             | 0.000                  | 1.093 | 1.080      | 166 |
| Average population growth percent   | -0.033   | 0.063      | -0.524  | 0.601           | -0.004             | 0.002                  | 1.321 | 1.306      | 183 |
| GDP percent growth                  | 0.032    | 0.019      | 1.653   | 0.100           | 0.010              | 0.015                  | 1.309 | 1.294      | 179 |
| GDP per capita percent growth       | 0.034    | 0.016      | 2.182   | 0.030           | 0.021              | 0.026                  | 1.294 | 1.280      | 179 |
| latitude                            | 0.005    | 0.003      | 1.522   | 0.130           | 0.007              | 0.013                  | 1.333 | 1.318      | 183 |
| buffalo                             | 0.000    | 0.000      | 1.470   | 0.149           | 0.028              | 0.051                  | 1.169 | 1.113      | 42  |
| Average precipitation               | 0.000    | 0.000      | -0.202  | 0.840           | -0.005             | 0.000                  | 1.282 | 1.268      | 179 |
| Physicians per 1000 people          | 0.105    | 0.053      | 1.969   | 0.051           | 0.017              | 0.023                  | 1.137 | 1.123      | 165 |
| Death rate per 1000 people          | 0.013    | 0.032      | 0.401   | 0.689           | -0.005             | 0.001                  | 1.299 | 1.285      | 182 |
| Birth rate per 1000 people          | -0.014   | 0.008      | -1.729  | 0.086           | 0.011              | 0.016                  | 1.279 | 1.265      | 182 |
| Log number poor                     | 0.275    | 0.032      | 8.557   | <0.01           | 0.417              | 0.423                  | 0.669 | 0.656      | 102 |
| Log food imports percent            | -1.195   | 0.152      | -7.844  | <0.01           | 0.266              | 0.270                  | 0.990 | 0.978      | 168 |
| Log human population density        | 0.017    | 0.062      | 0.267   | 0.790           | -0.005             | 0.000                  | 1.338 | 1.323      | 183 |
| Log mean annual temperature average | -0.051   | 0.118      | -0.431  | 0.667           | -0.005             | 0.001                  | 1.082 | 1.069      | 163 |
| Log health expenditure percent GDP  | 0.364    | 0.217      | 1.678   | 0.095           | 0.010              | 0.016                  | 1.323 | 1.308      | 176 |
| Log chicken                         | 0.367    | 0.026      | 13.938  | <0.01           | 0.587              | 0.590                  | 0.471 | 0.464      | 137 |
| Log horse                           | 0.210    | 0.039      | 5.324   | <0.01           | 0.181              | 0.187                  | 0.956 | 0.941      | 125 |
| Log poverty index                   | 0.121    | 0.060      | 2.012   | 0.047           | 0.029              | 0.039                  | 1.114 | 1.092      | 102 |
| Log poverty headcount percent       | 0.132    | 0.065      | 2.022   | 0.046           | 0.030              | 0.039                  | 1.113 | 1.091      | 102 |
| Log prevalence undernourishment     | -0.202   | 0.093      | -2.179  | 0.031           | 0.023              | 0.029                  | 1.100 | 1.086      | 159 |
| Log land area                       | 0.282    | 0.028      | 9.991   | <0.01           | 0.352              | 0.355                  | 0.862 | 0.853      | 183 |
| Log GDP value                       | 0.384    | 0.024      | 16.000  | <0.01           | 0.586              | 0.588                  | 0.542 | 0.536      | 181 |
| Log surface area                    | 0.279    | 0.028      | 9.794   | <0.01           | 0.342              | 0.345                  | 0.881 | 0.871      | 184 |
| Log GNI Atlas                       | 0.381    | 0.024      | 15.936  | <0.01           | 0.591              | 0.593                  | 0.523 | 0.518      | 176 |
| Log goat                            | 0.122    | 0.030      | 4.048   | <0.01           | 0.092              | 0.098                  | 1.029 | 1.015      | 153 |

**Table S14. Univariable analysis (outcome: logarithm of emerging pathogen count; winsorized data)**

| <b>Non-parametric coefficients</b>                                                                                                                                                                                                                                                                                                   |                 |                   |                |                           |                           |                               |            |                   |          |
|--------------------------------------------------------------------------------------------------------------------------------------------------------------------------------------------------------------------------------------------------------------------------------------------------------------------------------------|-----------------|-------------------|----------------|---------------------------|---------------------------|-------------------------------|------------|-------------------|----------|
| <b>Variable Name</b>                                                                                                                                                                                                                                                                                                                 | <b>edf</b>      | <b>Ref. df</b>    | <b>F</b>       | <b>p-value</b>            | <b>Adjusted R-squared</b> | <b>deviance explained (%)</b> | <b>GCV</b> | <b>scale est.</b> | <b>n</b> |
| s(hdi rank)                                                                                                                                                                                                                                                                                                                          | 2.59            | 3.21              | 7.80           | <0.01                     | 0.12                      | 0.14                          | 1.12       | 1.10              | 180.00   |
| s(hdi value)                                                                                                                                                                                                                                                                                                                         | 3.02            | 3.73              | 7.12           | <0.01                     | 0.13                      | 0.14                          | 1.12       | 1.09              | 180.00   |
| s(life expectancy)                                                                                                                                                                                                                                                                                                                   | 3.10            | 3.81              | 6.71           | <0.01                     | 0.12                      | 0.14                          | 1.13       | 1.10              | 182.00   |
| s(expected years schooling)                                                                                                                                                                                                                                                                                                          | 2.53            | 3.14              | 9.84           | <0.01                     | 0.15                      | 0.16                          | 1.10       | 1.07              | 181.00   |
| s(mean years schooling)                                                                                                                                                                                                                                                                                                              | 3.49            | 4.31              | 3.20           | 0.01                      | 0.07                      | 0.08                          | 1.20       | 1.17              | 180.00   |
| s(GNI minus HDI rank)                                                                                                                                                                                                                                                                                                                | 2.75            | 3.43              | 2.88           | 0.03                      | 0.05                      | 0.07                          | 1.23       | 1.20              | 174.00   |
| s(average precipitation)                                                                                                                                                                                                                                                                                                             | 6.00            | 7.14              | 1.63           | 0.14                      | 0.05                      | 0.08                          | 1.20       | 1.15              | 179.00   |
| s(NDI)                                                                                                                                                                                                                                                                                                                               | 2.23            | 2.77              | 4.58           | 0.01                      | 0.07                      | 0.09                          | 0.89       | 0.87              | 154.00   |
| s(NRI)                                                                                                                                                                                                                                                                                                                               | 2.37            | 2.93              | 3.99           | 0.01                      | 0.06                      | 0.08                          | 0.91       | 0.89              | 157.00   |
| s(human population)                                                                                                                                                                                                                                                                                                                  | 7.12            | 8.12              | 24.26          | <0.01                     | 0.52                      | 0.54                          | 0.63       | 0.60              | 183.00   |
| s(birth rate per 1000 people)                                                                                                                                                                                                                                                                                                        | 2.46            | 3.04              | 2.50           | 0.06                      | 0.03                      | 0.05                          | 1.21       | 1.18              | 182.00   |
| <b>log-transformed variables</b>                                                                                                                                                                                                                                                                                                     |                 |                   |                |                           |                           |                               |            |                   |          |
| s(log exports percent GDP)                                                                                                                                                                                                                                                                                                           | 3.59            | 4.41              | 3.36           | 0.01                      | 0.07                      | 0.09                          | 1.12       | 1.09              | 175.00   |
| s (log imports percent GDP)                                                                                                                                                                                                                                                                                                          | 2.93            | 3.63              | 14.23          | <0.01                     | 0.22                      | 0.24                          | 0.96       | 0.94              | 178.00   |
| s( log food exports percent)                                                                                                                                                                                                                                                                                                         | 2.14            | 2.64              | 4.48           | 0.01                      | 0.07                      | 0.08                          | 1.21       | 1.19              | 169.00   |
| s (log GDP per capita)                                                                                                                                                                                                                                                                                                               | 2.06            | 2.55              | 5.02           | <0.01                     | 0.07                      | 0.08                          | 1.18       | 1.16              | 181.00   |
| s (log national income per capita)                                                                                                                                                                                                                                                                                                   | 2.30            | 2.85              | 5.40           | <0.01                     | 0.08                      | 0.09                          | 1.18       | 1.15              | 180.00   |
| s (log health expenditure per capita)                                                                                                                                                                                                                                                                                                | 2.40            | 2.96              | 7.19           | <0.01                     | 0.11                      | 0.12                          | 1.15       | 1.13              | 176.00   |
| s (log Nurses midwives per 1000 people)                                                                                                                                                                                                                                                                                              | 6.96            | 7.99              | 3.96           | <0.01                     | 0.15                      | 0.18                          | 0.94       | 0.89              | 164.00   |
| s (log GNI per capita Atlas)                                                                                                                                                                                                                                                                                                         | 2.33            | 2.89              | 6.30           | <0.01                     | 0.09                      | 0.11                          | 1.12       | 1.10              | 176.00   |
| s (log sheep)                                                                                                                                                                                                                                                                                                                        | 3.86            | 4.77              | 8.73           | <0.01                     | 0.21                      | 0.23                          | 0.88       | 0.85              | 158.00   |
| For each model, edf means equivalent degrees of freedom, the percentage of deviance explained (Dev. %), the generalized cross validation (GCV) score, adjusted R squared and the parameters F and P-value are given. The smoothing functions are referred to as s(). Explanatory variables used in each model appear in brackets: S. |                 |                   |                |                           |                           |                               |            |                   |          |
| <b>Parametric coefficients</b>                                                                                                                                                                                                                                                                                                       |                 |                   |                |                           |                           |                               |            |                   |          |
| <b>Variable Name</b>                                                                                                                                                                                                                                                                                                                 | <b>estimate</b> | <b>std. error</b> | <b>t-value</b> | <b>pr (&gt;t) - value</b> | <b>Adjusted R-squared</b> | <b>deviance explained (%)</b> | <b>GCV</b> | <b>scale est.</b> | <b>n</b> |
| Agri land percent                                                                                                                                                                                                                                                                                                                    | 0.002           | 0.004             | 0.404          | 0.687                     | -0.005                    | 0.001                         | 1.283      | 1.269             | 183      |
| Mean annual precipitation                                                                                                                                                                                                                                                                                                            | 0.000           | 0.000             | 0.292          | 0.771                     | -0.006                    | 0.001                         | 1.038      | 1.026             | 166      |
| Average population growth percent                                                                                                                                                                                                                                                                                                    | 0.008           | 0.073             | 0.113          | 0.910                     | -0.005                    | 0.000                         | 1.269      | 1.255             | 183      |

|                                     |        |       |        |       |        |       |       |       |     |
|-------------------------------------|--------|-------|--------|-------|--------|-------|-------|-------|-----|
| GDP percent growth                  | 0.060  | 0.034 | 1.779  | 0.077 | 0.012  | 0.018 | 1.252 | 1.238 | 179 |
| GDP per capita percent growth       | 0.066  | 0.032 | 2.081  | 0.039 | 0.018  | 0.024 | 1.244 | 1.230 | 179 |
| latitude                            | 0.006  | 0.004 | 1.682  | 0.094 | 0.010  | 0.015 | 1.276 | 1.262 | 183 |
| buffalo                             | 0.000  | 0.000 | 1.551  | 0.129 | 0.033  | 0.057 | 1.035 | 0.986 | 42  |
| Physicians per 1000 people          | 0.106  | 0.056 | 1.880  | 0.062 | 0.015  | 0.021 | 1.084 | 1.071 | 165 |
| Death rate per 1000 people          | 0.012  | 0.034 | 0.364  | 0.717 | -0.005 | 0.001 | 1.246 | 1.232 | 182 |
| Log number poor                     | 0.288  | 0.034 | 8.473  | <0.01 | 0.412  | 0.418 | 0.651 | 0.638 | 102 |
| Log food imports percent            | -1.317 | 0.164 | -8.048 | <0.01 | 0.276  | 0.281 | 0.935 | 0.924 | 168 |
| Log human population density        | -0.007 | 0.069 | -0.107 | 0.915 | -0.005 | 0.000 | 1.284 | 1.270 | 183 |
| Log mean annual temperature average | -0.054 | 0.148 | -0.364 | 0.716 | -0.005 | 0.001 | 1.027 | 1.015 | 163 |
| Log health expenditure percent GDP  | 0.371  | 0.230 | 1.613  | 0.109 | 0.009  | 0.015 | 1.270 | 1.255 | 176 |
| Log chicken                         | 0.395  | 0.029 | 13.791 | <0.01 | 0.582  | 0.585 | 0.451 | 0.444 | 137 |
| Log horse                           | 0.217  | 0.041 | 5.264  | <0.01 | 0.177  | 0.184 | 0.903 | 0.889 | 125 |
| Log poverty index                   | 0.124  | 0.062 | 2.012  | 0.047 | 0.029  | 0.039 | 1.075 | 1.054 | 102 |
| Log poverty headcount percent       | 0.133  | 0.068 | 1.963  | 0.052 | 0.028  | 0.037 | 1.077 | 1.056 | 102 |
| Log prevalence undernourishment     | -0.199 | 0.092 | -2.158 | 0.033 | 0.023  | 0.029 | 1.046 | 1.033 | 159 |
| Log land area                       | 0.282  | 0.029 | 9.596  | <0.01 | 0.334  | 0.337 | 0.851 | 0.842 | 183 |
| Log GDP value                       | 0.396  | 0.026 | 15.370 | <0.01 | 0.567  | 0.569 | 0.544 | 0.538 | 181 |
| Log surface area                    | 0.279  | 0.030 | 9.370  | <0.01 | 0.322  | 0.325 | 0.871 | 0.862 | 184 |
| Log GNI Atlas                       | 0.391  | 0.026 | 15.290 | <0.01 | 0.571  | 0.573 | 0.526 | 0.520 | 176 |
| Log goat                            | 0.120  | 0.032 | 3.766  | <0.01 | 0.080  | 0.086 | 0.988 | 0.975 | 153 |
| duck                                | 0.000  | 0.000 | 3.916  | <0.01 | 0.140  | 0.150 | 0.756 | 0.739 | 89  |
| Forest area percent                 | 0.000  | 0.004 | -0.082 | 0.935 | -0.006 | 0.000 | 1.284 | 1.270 | 182 |
| longitude                           | 0.002  | 0.001 | 1.355  | 0.177 | 0.005  | 0.010 | 1.283 | 1.269 | 183 |
| log cattle                          | 0.318  | 0.031 | 10.377 | <0.01 | 0.394  | 0.398 | 0.674 | 0.666 | 165 |
| Log pig                             | 0.301  | 0.030 | 9.969  | <0.01 | 0.420  | 0.424 | 0.656 | 0.646 | 137 |

**Table S15. Generalized additive model of emerging pathogens reported from different countries (original data– uncontrolled research effort)**

| <b>Outcome: Log (number of emerging pathogens)</b> |                 |                   |                |                    |
|----------------------------------------------------|-----------------|-------------------|----------------|--------------------|
| <b>Estimation of Parametric coefficients</b>       |                 |                   |                |                    |
| <b>Variable</b>                                    | <b>Estimate</b> | <b>Std. Error</b> | <b>t value</b> | <b>Pr(&gt; t )</b> |
| Intercept                                          | -5.65           | 0.70              | -8.06          | <0.001             |
| Log human population density                       | 0.51            | 0.05              | 10.50          | <0.001             |
| Agri land percentage                               | -0.005          | 0.002             | -2.01          | 0.046              |
| Log land area                                      | 0.51            | 0.04              | 11.64          | <0.001             |
| Approximate significance of smoothed terms         |                 |                   |                |                    |
| <i>Variable</i>                                    | <i>edf</i>      | <i>Ref. df</i>    | <i>F</i>       | <i>p-value</i>     |
| s(hdi value)                                       | 4.33            | 4.78              | 15.35          | <0.001             |
| s(ndi)                                             | 1.00            | 1.00              | 6.70           | 0.01               |
| s(longitude)                                       | 3.87            | 4.45              | 7.52           | <0.001             |
| s(log sheep population)                            | 5.78            | 6.90              | 2.21           | 0.04               |

R-sq.(adj) = 0.768; Deviance explained = 79.8%; GCV=0.26532; Scale est. = 0.22962 n = 141; edf: Estimated degrees of freedom; Ref. df: Degrees of freedom before smoothing

**Table S16. Generalized additive model of emerging pathogens reported from different countries (winsorised data—uncontrolled research effort)**

| <b>Outcome:</b> Log (number of emerging pathogens) |                                  |                   |                |                    |
|----------------------------------------------------|----------------------------------|-------------------|----------------|--------------------|
| <i>Estimation of Parametric coefficients</i>       |                                  |                   |                |                    |
| <b>Variable</b>                                    | <b>Estimate</b>                  | <b>Std. Error</b> | <b>t value</b> | <b>Pr(&gt; t )</b> |
| Intercept                                          | -5.80                            | 0.63              | -9.232         | <0.001             |
| Log land area                                      | Variable involved in interaction |                   |                |                    |
| Log human population density                       | Variable involved in interaction |                   |                |                    |
| Log mean annual temperature (average)              | 0.61                             | 0.13              | 4.65           | <0.001             |
| <i>Approximate significance of smoothed terms</i>  |                                  |                   |                |                    |
| Variable                                           | edf                              | Ref. df           | F              | p-value            |
| s(hdi value)                                       | Variable involved in interaction |                   |                |                    |
| s(gni minus HDI rank)                              | Variable involved in interaction |                   |                |                    |
| s(ndi)                                             | 1.00                             | 1.00              | 4.10           | 0.04               |
| <i>Interaction terms</i>                           |                                  |                   |                |                    |
| s(hdi value):log human population density          | Interaction effect, see Fig. S3  |                   |                |                    |
| s (hdi value): log land area                       | Interaction effect, see Fig. S3  |                   |                |                    |
| s(gni minus HDI rank):log human population density | Interaction effect, see Fig. S3  |                   |                |                    |
| s(gni minus HDI rank):log land area                | Interaction effect, see Fig. S3  |                   |                |                    |
| ti(hdi value, gni minus HDI rank)                  | Interaction effect, see Fig. S3  |                   |                |                    |

Rank: 64/68; R-sq. (adj) = 0.73; Deviance explained = 76.8%; Scale est. = 0.25; n = 145; edf: Estimated degrees of freedom; Ref. df: Degrees of freedom before smoothing

Fig. S3. Smoothed curves of the additive effect to the estimated number of emerging pathogens (winsorized data–uncontrolled research effort) for the individual environmental and social parameters in the Generalized Additive Model. Shaded areas represent 95% confidence intervals. Plots showing the combined effect of the linear and nonparametric contributions as well as significant interactions among smoothed terms have also been presented. P- value for all variables was  $<0.001$  except interaction term HDI value and GNI minus HDI rank ( $p=0.01$ ). LHPD: Log human population density, LLA: Log land area, GMHR: GNI minus HDI rank

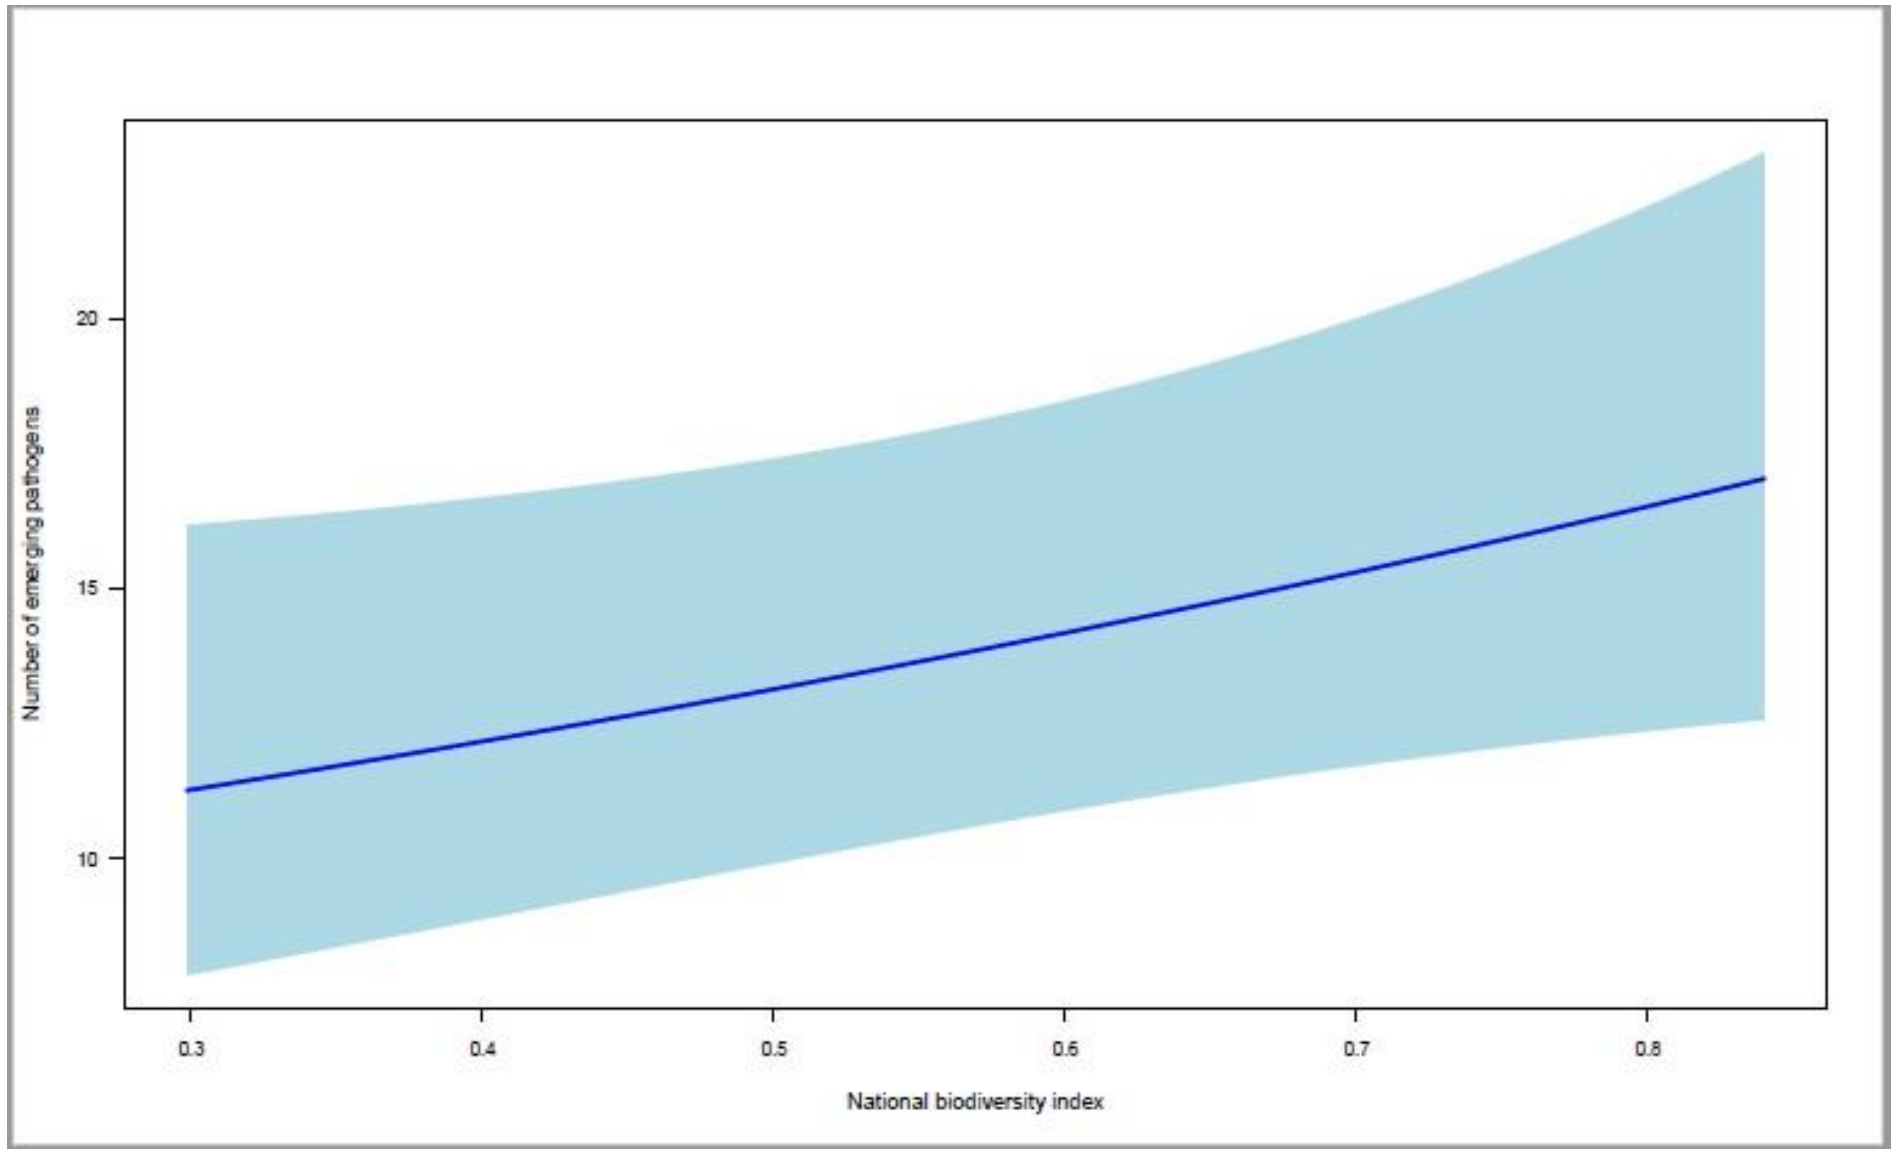



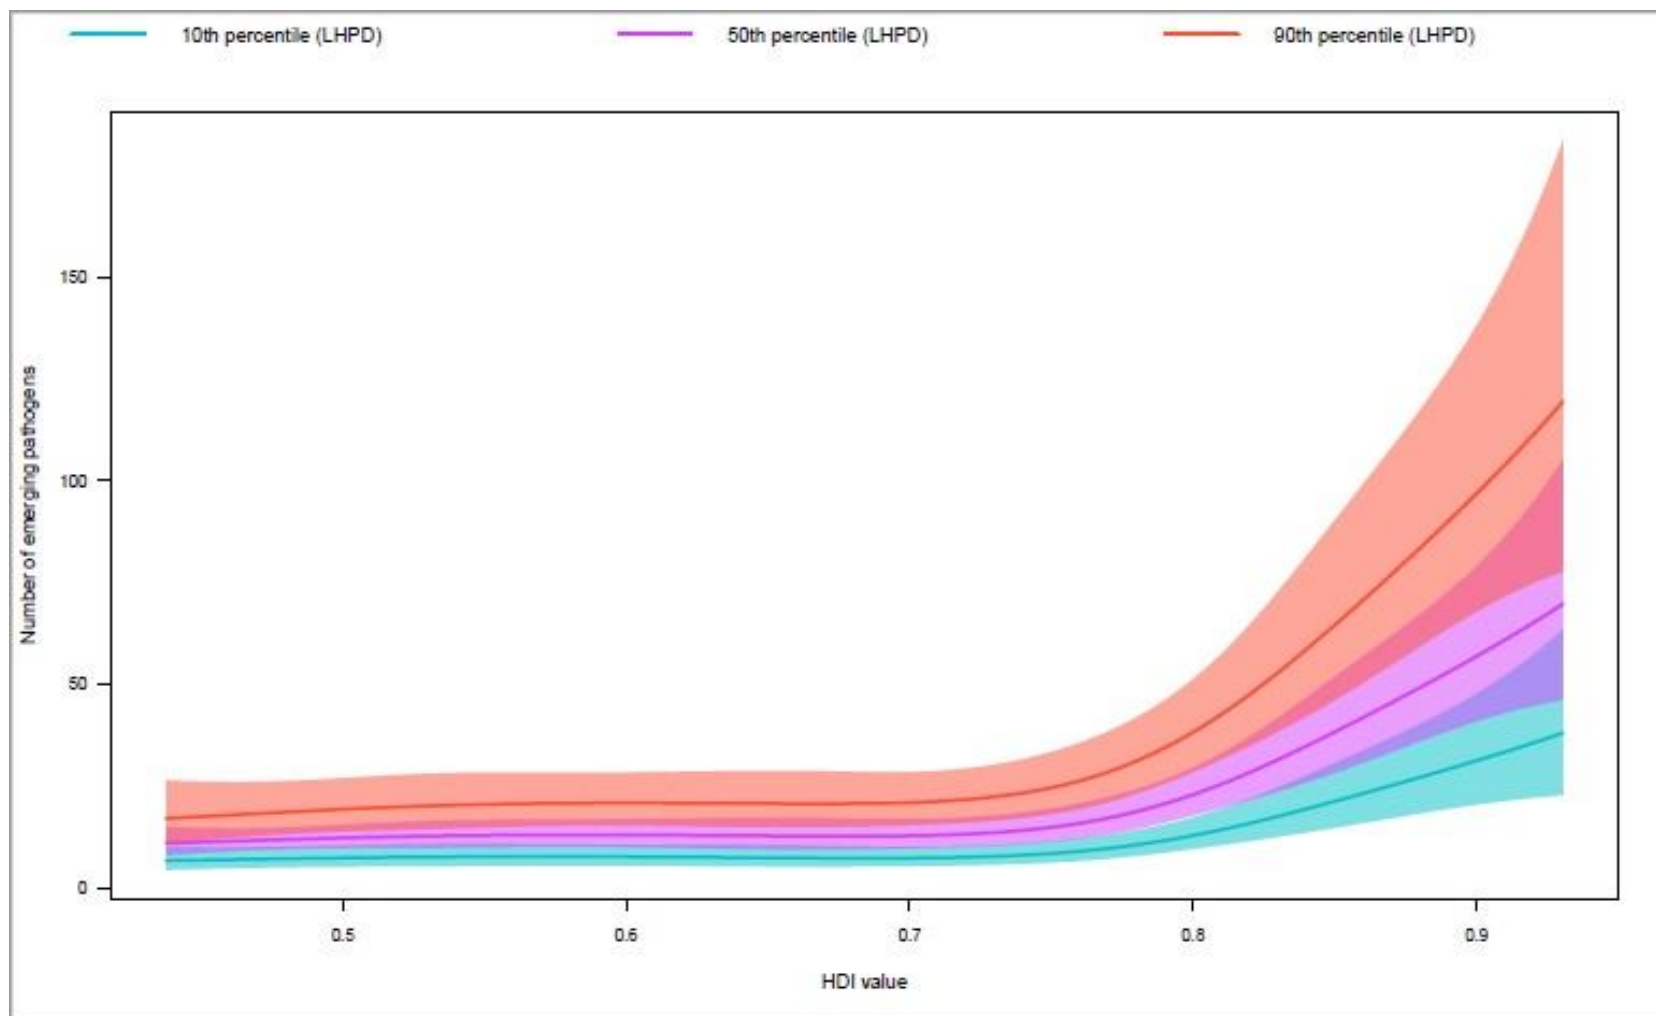

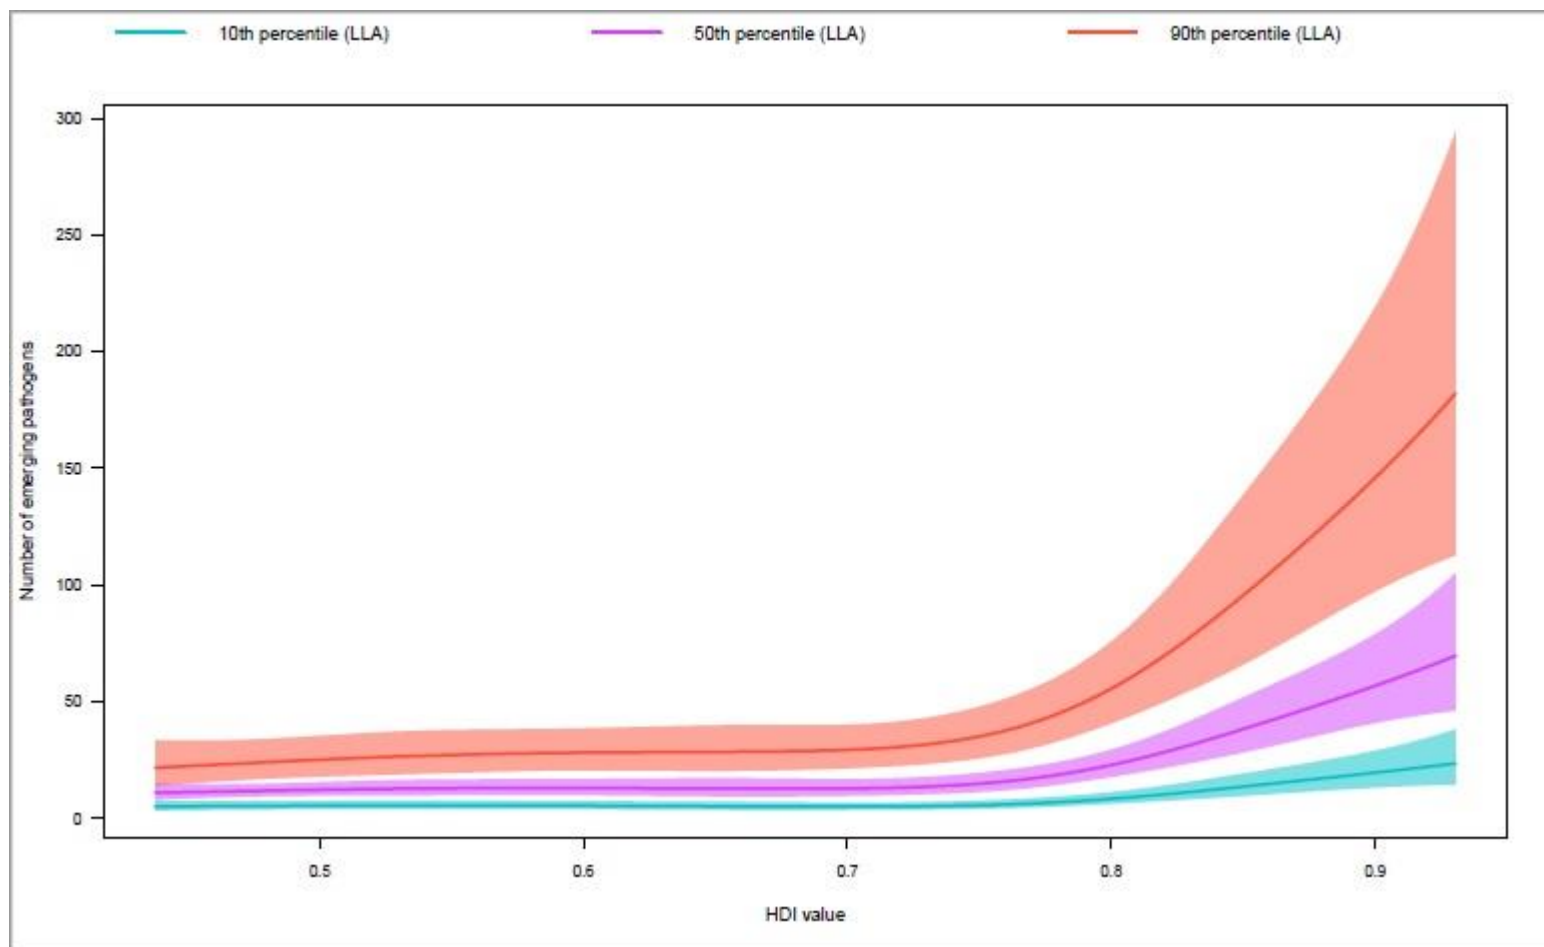

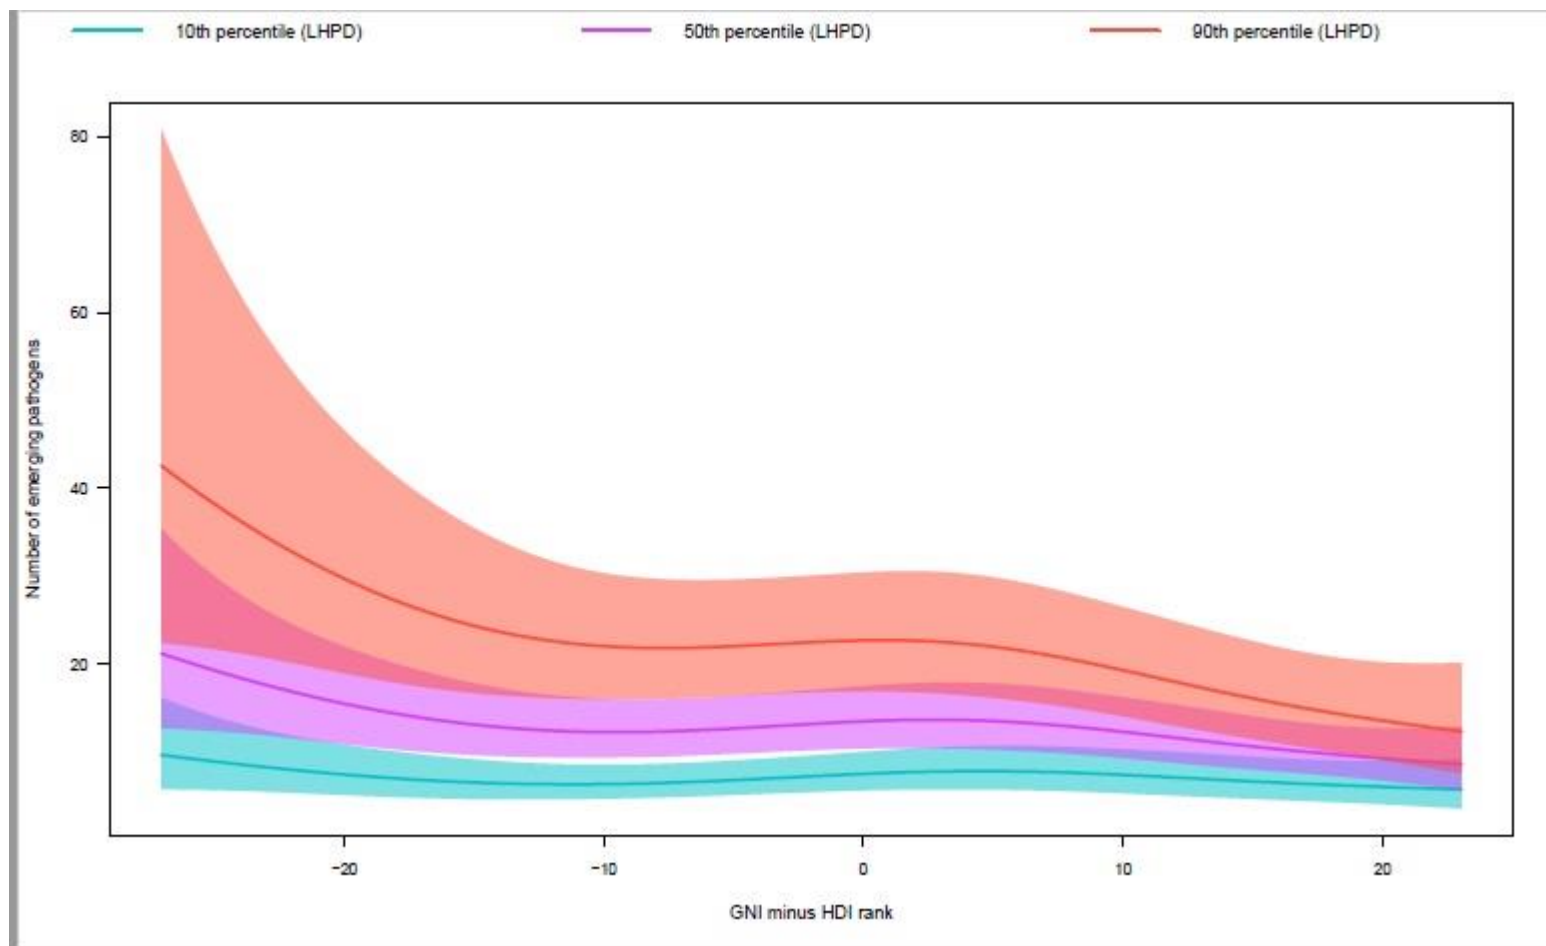

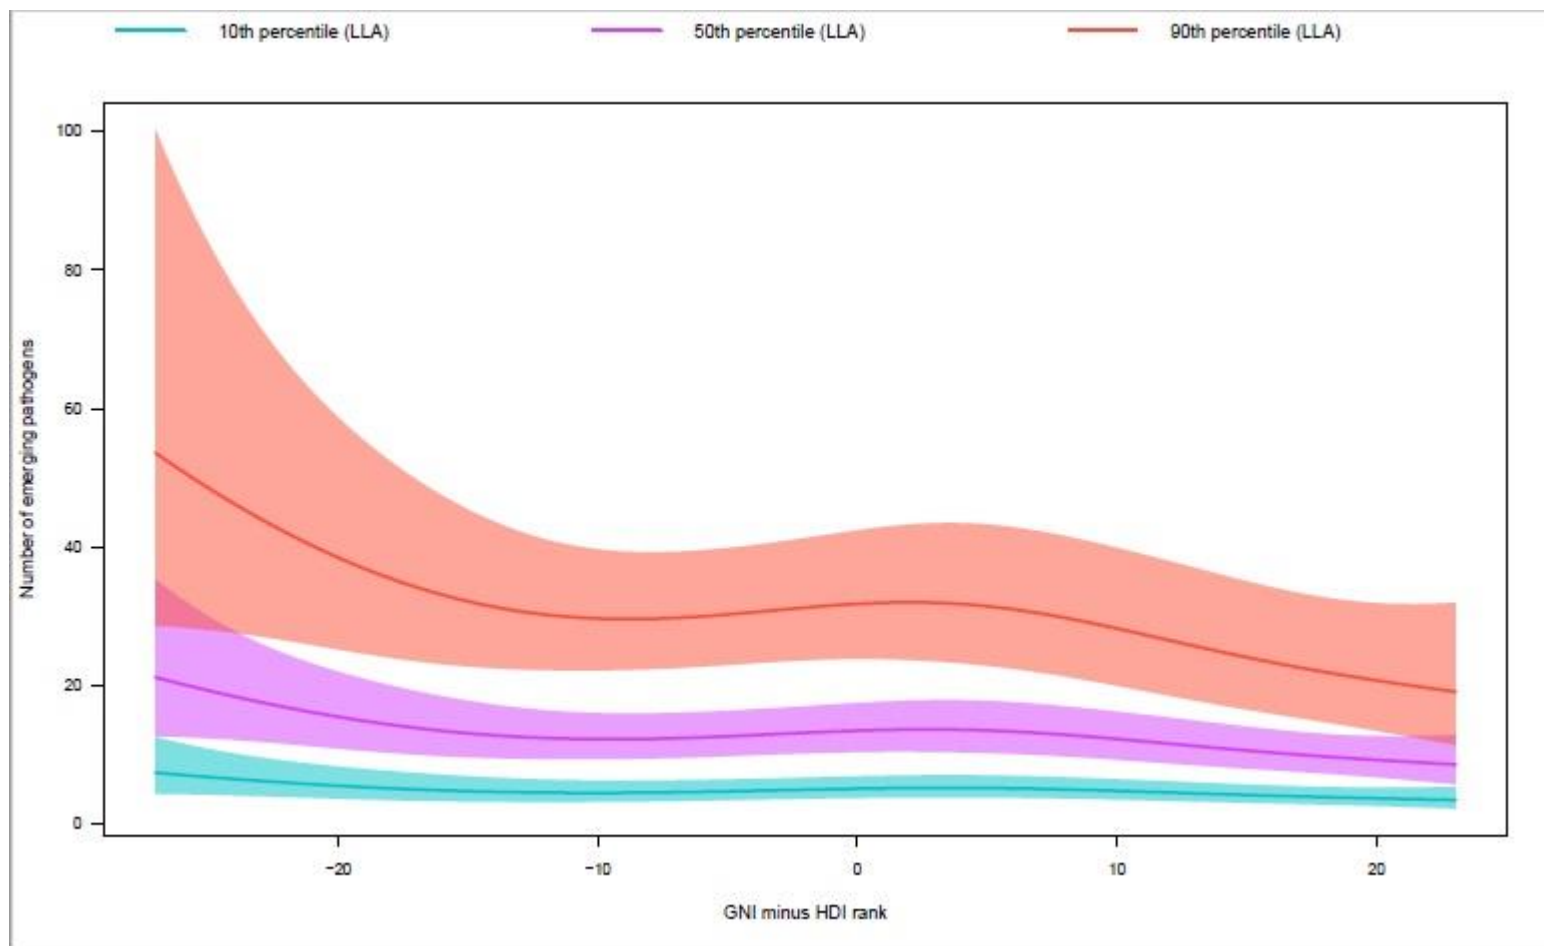

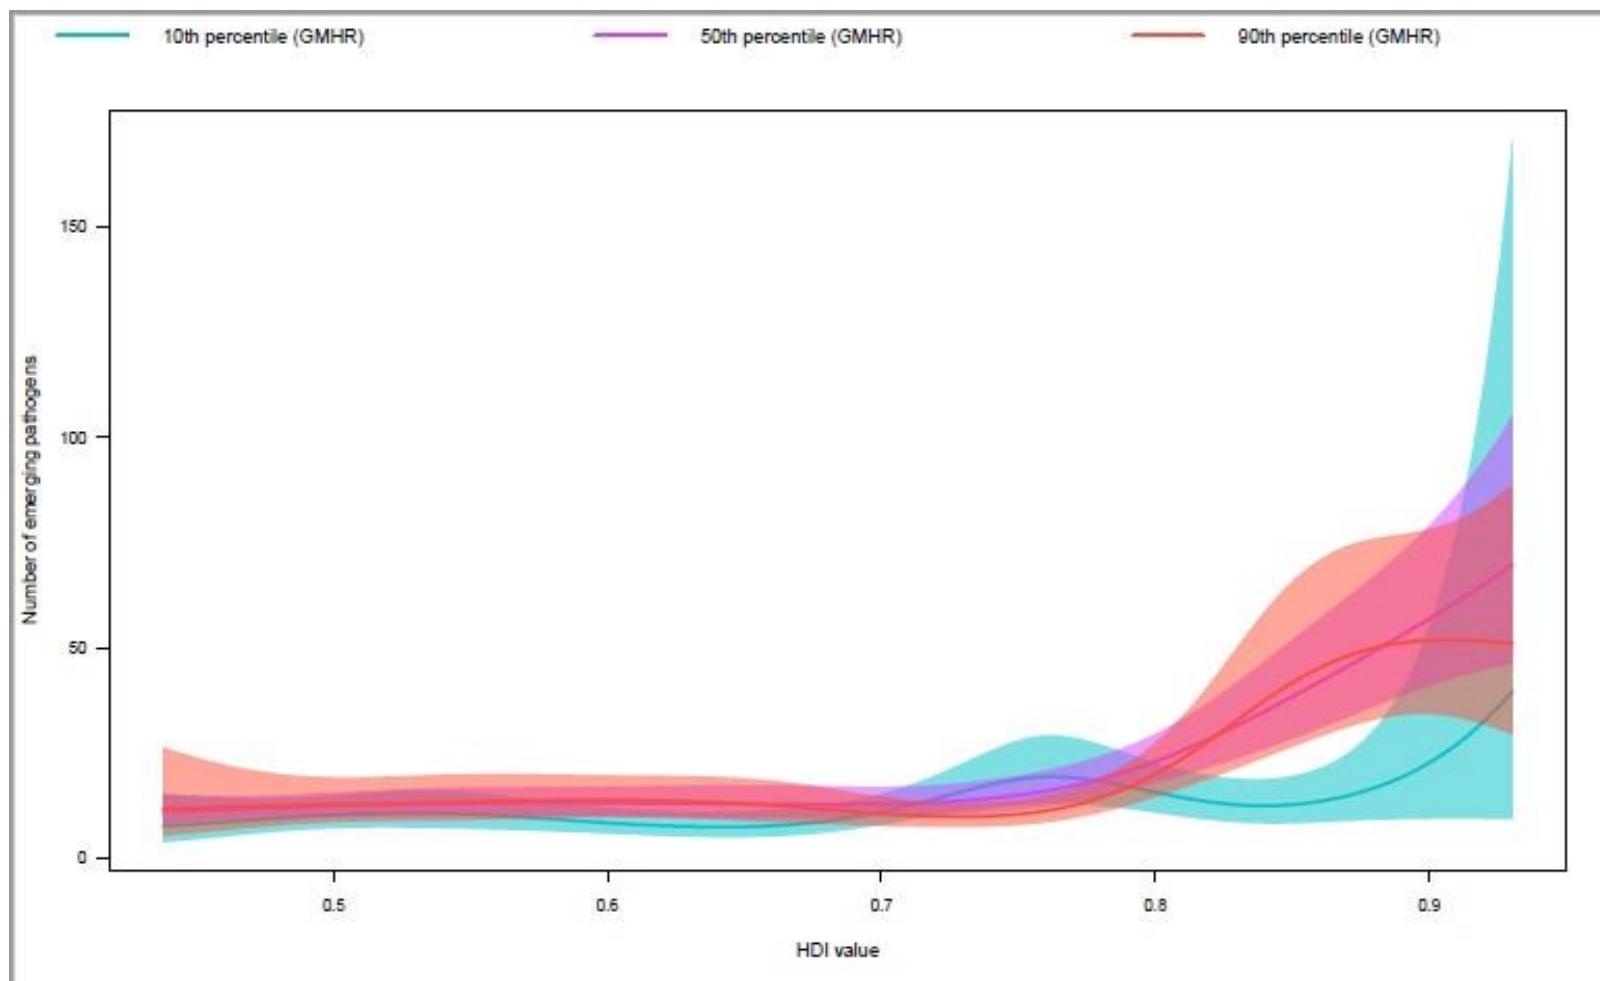

**Table S17. Generalized additive model of emerging pathogens reported from different countries (original data – after controlling for the research effort)**

| <b>Outcome:</b> Log (number of emerging pathogens)                  |                                  |                   |                |                    |
|---------------------------------------------------------------------|----------------------------------|-------------------|----------------|--------------------|
| <b>Estimation of Parametric coefficients</b>                        |                                  |                   |                |                    |
| <b>Variable</b>                                                     | <b>Estimate</b>                  | <b>Std. Error</b> | <b>t value</b> | <b>Pr(&gt; t )</b> |
| Intercept                                                           | -4.93                            | 0.89              | -5.54          | <0.001             |
| Longitude                                                           | Variable involved in interaction |                   |                |                    |
| Log human population density                                        | Variable involved in interaction |                   |                |                    |
| Log land area                                                       | Variable involved in interaction |                   |                |                    |
| Longitude:log human population density                              | Interaction effect, see Fig. 4   |                   |                |                    |
| <b>Approximate significance of smoothed terms</b>                   |                                  |                   |                |                    |
| <b>Variable</b>                                                     | <b>edf</b>                       | <b>Ref-df</b>     | <b>F</b>       | <b>p-value</b>     |
| s(hdi value)                                                        | Variable involved in interaction |                   |                |                    |
| s(log mean annual temperature average)                              | Variable involved in interaction |                   |                |                    |
| s(death rate per 1000 people)                                       | Variable involved in interaction |                   |                |                    |
| s(hdi value):log land area                                          | Interaction effect, see Fig. 4   |                   |                |                    |
| ti(hdi value, log mean annual temperature average)                  | Interaction effect, see Fig. 4   |                   |                |                    |
| ti(log mean annual temperature average, death rate per 1000 people) | Interaction effect, see Fig. 4   |                   |                |                    |

R-sq.(adj) = 0.83; Deviance explained = 86.8%; GCV = 0.21; Scale est. = 0.16  
n = 104; edf: Estimated degrees of freedom; Ref-df: Degrees of freedom before smoothing

**Table S18. Generalized additive model of emerging pathogens reported from different countries (winsorised data - after controlling for the research effort)**

| <b>Outcome:</b> Log (number of emerging pathogens) |                                  |                   |                |                    |
|----------------------------------------------------|----------------------------------|-------------------|----------------|--------------------|
| <b>Estimation of Parametric coefficients</b>       |                                  |                   |                |                    |
| <b>Variable</b>                                    | <b>Estimate</b>                  | <b>Std. Error</b> | <b>t value</b> | <b>Pr(&gt; t )</b> |
| Intercept                                          | -9.30                            | 0.85              | -10.92         | <0.001             |
| Log land area                                      | Variable involved in interaction |                   |                |                    |
| Log mean annual temperature average                | Variable involved in interaction |                   |                |                    |
| Log human population density                       | Variable involved in interaction |                   |                |                    |
| Log health expenditure percent GDP                 | Variable involved in interaction |                   |                |                    |
| Log GERD in US dollars                             | 0.03                             | 0.02              | 1.19           | 0.23               |
| <i>Approximate significance of smoothed terms</i>  |                                  |                   |                |                    |
| <i>Variable</i>                                    | <i>edf</i>                       | <i>Ref-df</i>     | <i>F</i>       | <i>p-value</i>     |
| s(hdi value)                                       | Variable involved in interaction |                   |                |                    |
| s(hdi value):log land area                         | Interaction effect, Fig. S4      |                   |                |                    |
| s(hdi value):log mean annual temperature average   | Interaction effect, Fig. S4      |                   |                |                    |
| s(hdi value):log human population density          | Interaction effect, Fig. S4      |                   |                |                    |
| s(hdi value):log health expenditure percent GDP    | Interaction effect, Fig. S4      |                   |                |                    |

R-sq.(adj) = 0.82; Deviance explained = 85.2%; GCV = 0.21; Scale est. = 0.17  
n = 103; edf: Estimated degrees of freedom; Ref-df: Degrees of freedom before smoothing

Fig. S4. Smoothed curves of the additive effect to the estimated number of emerging pathogens (winsorized data–controlled research effort) for the individual, environmental and social parameters in the Generalized Additive Model. Shaded areas represent 95% confidence intervals. Plots showing the combined effect of the significant interactions among smoothed terms have also been presented. P-values for all variables was <0.001. LLA: Log land area, LMATA: Log mean annual temperature average, LHPD: Log human population density, LHEPG: Log health expenditure percent GDP

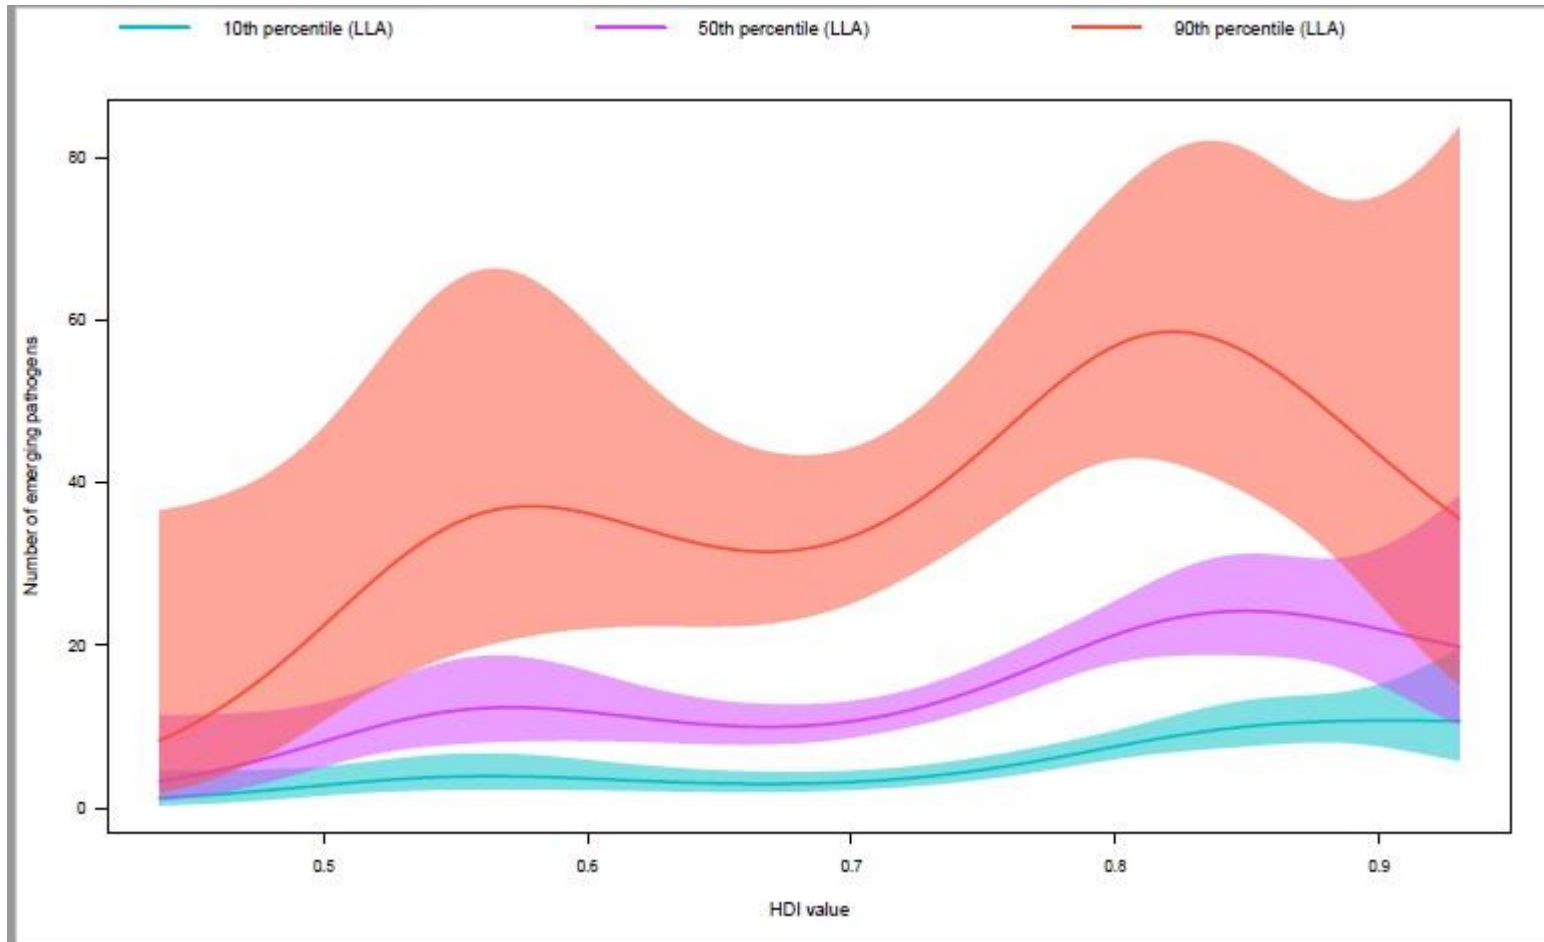



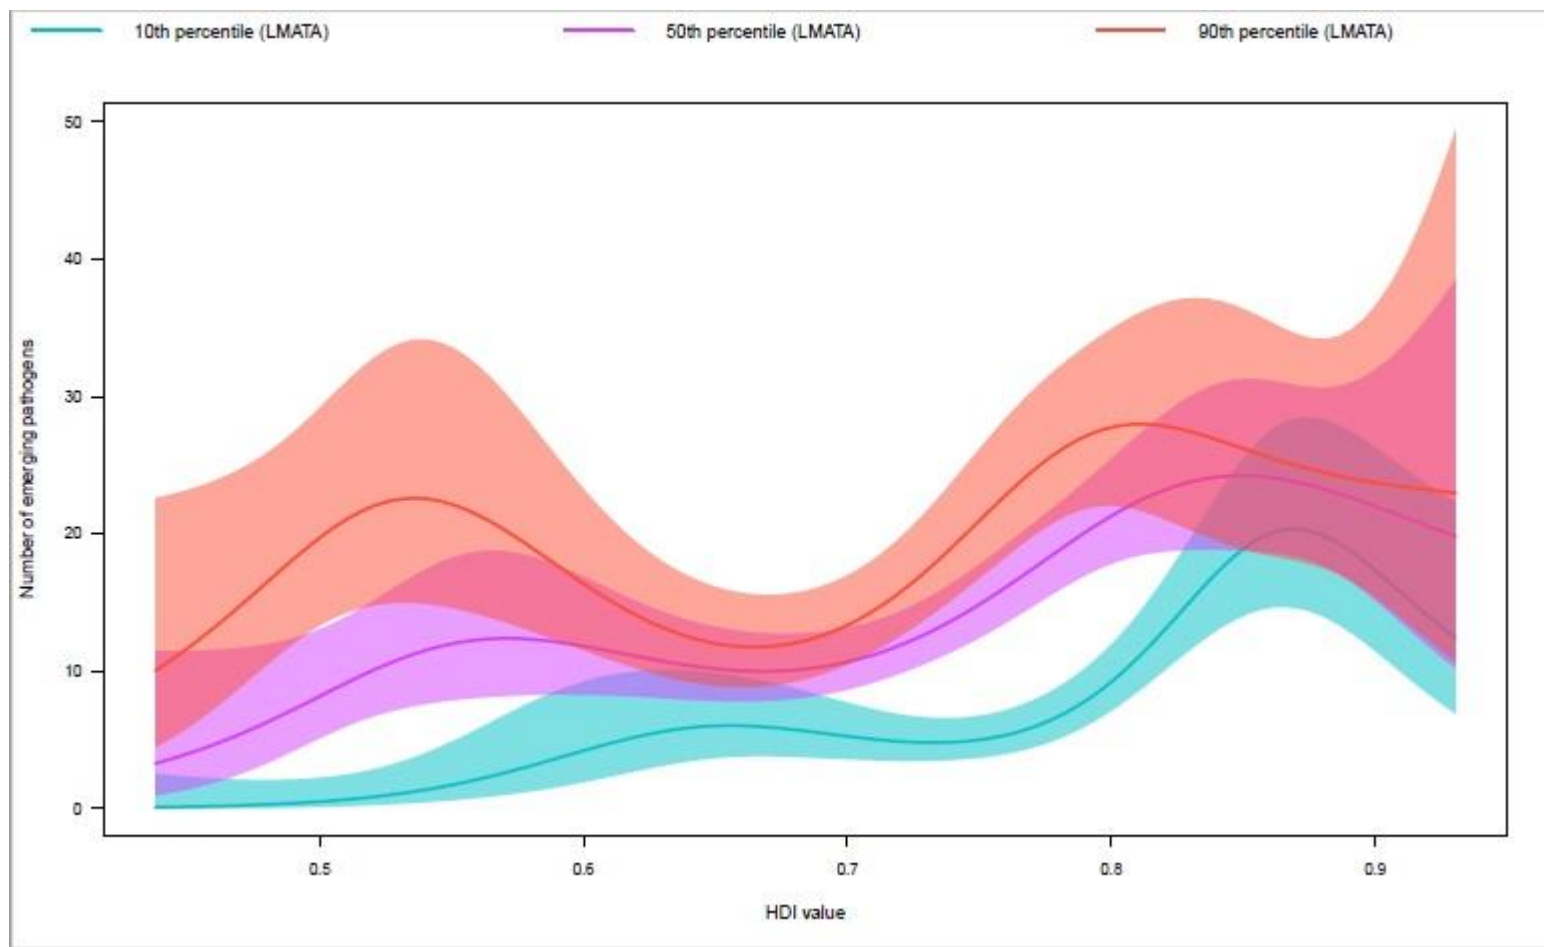

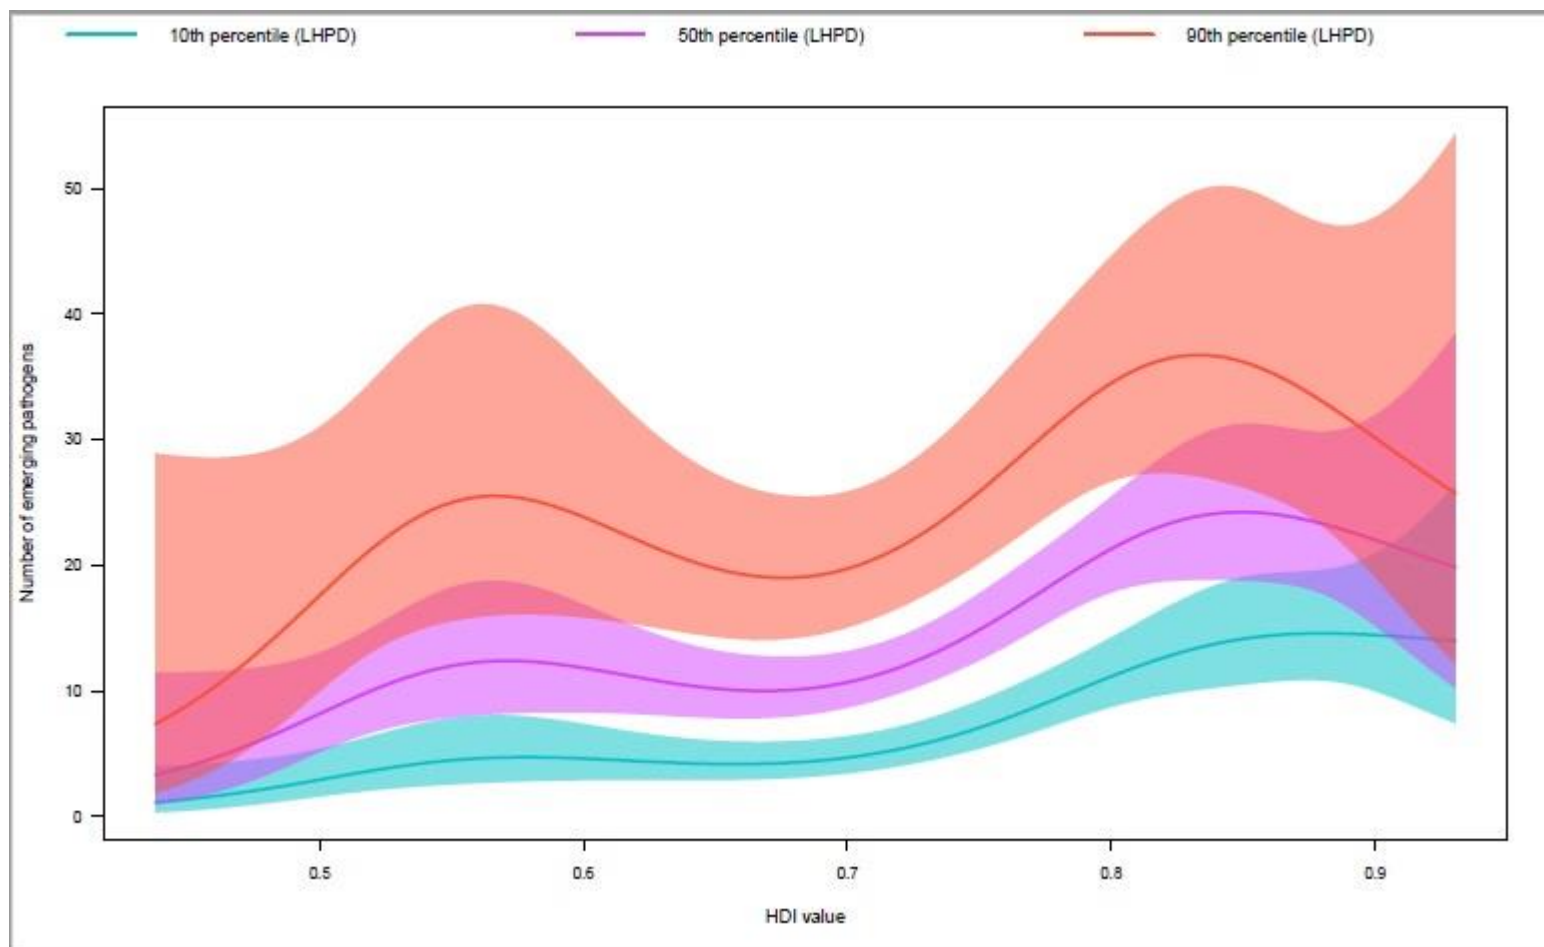

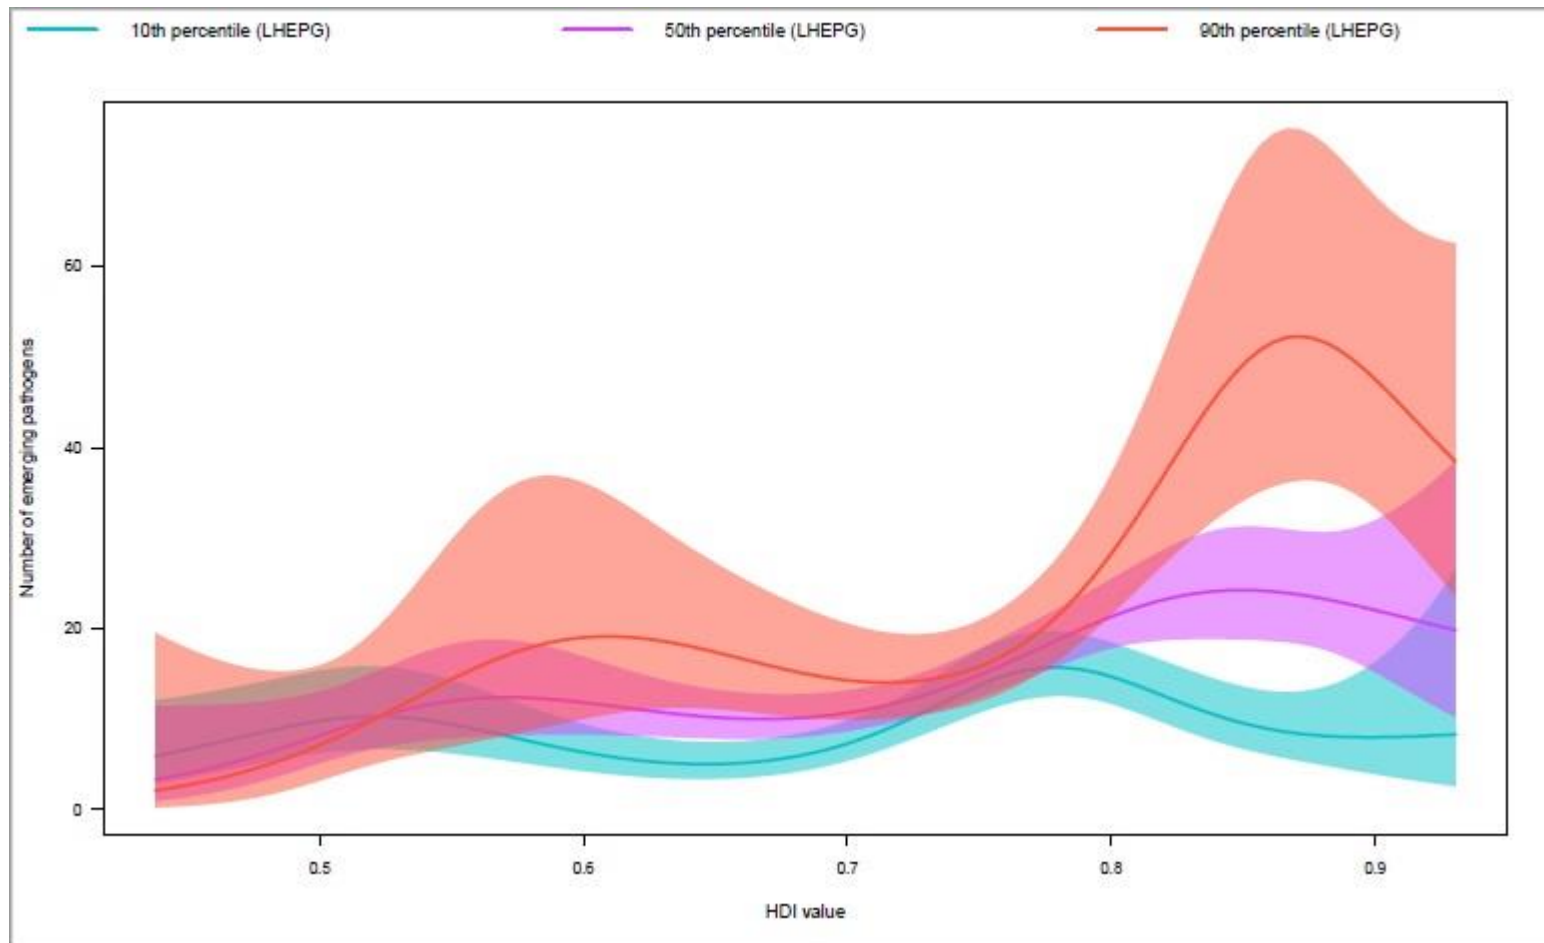

## Human pathogen diversity

**Table S19. Univariable analysis (outcome: logarithm of human pathogen count; original data)**

| <b>Non-parametric coefficients</b>                                                                                                                                                                                                                                                                                                   |            |               |          |                |                           |                               |            |                   |          |
|--------------------------------------------------------------------------------------------------------------------------------------------------------------------------------------------------------------------------------------------------------------------------------------------------------------------------------------|------------|---------------|----------|----------------|---------------------------|-------------------------------|------------|-------------------|----------|
| <b>Variable Name</b>                                                                                                                                                                                                                                                                                                                 | <b>edf</b> | <b>Ref.df</b> | <b>F</b> | <b>p-value</b> | <b>Adjusted R-squared</b> | <b>deviance explained (%)</b> | <b>GCV</b> | <b>scale est.</b> | <b>n</b> |
| s(HDI rank)                                                                                                                                                                                                                                                                                                                          | 2.42       | 3.01          | 9.76     | <0.01          | 0.14                      | 0.15                          | 1.66       | 1.63              | 183.00   |
| s(HDI value)                                                                                                                                                                                                                                                                                                                         | 2.74       | 3.42          | 8.71     | <0.01          | 0.14                      | 0.15                          | 1.67       | 1.63              | 183.00   |
| s(life expectancy)                                                                                                                                                                                                                                                                                                                   | 3.15       | 3.91          | 7.52     | <0.01          | 0.14                      | 0.15                          | 1.68       | 1.64              | 185.00   |
| s(expected years schooling)                                                                                                                                                                                                                                                                                                          | 5.36       | 6.51          | 7.59     | <0.01          | 0.21                      | 0.23                          | 1.57       | 1.51              | 184.00   |
| s(mean years schooling)                                                                                                                                                                                                                                                                                                              | 3.96       | 4.93          | 4.69     | <0.01          | 0.11                      | 0.13                          | 1.74       | 1.69              | 180.00   |
| s(GNI minus HDI rank)                                                                                                                                                                                                                                                                                                                | 3.37       | 4.25          | 2.15     | 0.07           | 0.05                      | 0.06                          | 1.87       | 1.82              | 177.00   |
| s(duck)                                                                                                                                                                                                                                                                                                                              | 5.90       | 6.75          | 4.40     | <0.01          | 0.22                      | 0.27                          | 1.20       | 1.11              | 90.00    |
| s(NDI)                                                                                                                                                                                                                                                                                                                               | 7.70       | 8.57          | 2.48     | 0.02           | 0.10                      | 0.14                          | 1.41       | 1.33              | 154.00   |
| s(Forest area percent)                                                                                                                                                                                                                                                                                                               | 2.17       | 2.71          | 2.04     | 0.11           | 0.03                      | 0.04                          | 1.89       | 1.85              | 185.00   |
| s(NRI)                                                                                                                                                                                                                                                                                                                               | 2.81       | 3.53          | 2.72     | 0.03           | 0.06                      | 0.07                          | 1.42       | 1.38              | 157.00   |
| s(longitude)                                                                                                                                                                                                                                                                                                                         | 6.67       | 7.75          | 2.29     | 0.03           | 0.07                      | 0.11                          | 1.86       | 1.79              | 186.00   |
| s(human population)                                                                                                                                                                                                                                                                                                                  | 7.42       | 8.32          | 20.07    | <0.01          | 0.47                      | 0.49                          | 1.06       | 1.01              | 186.00   |
| s(average precipitation)                                                                                                                                                                                                                                                                                                             | 3.46       | 4.30          | 1.66     | 0.16           | 0.03                      | 0.05                          | 1.82       | 1.77              | 182.00   |
| s(birth rate per 1000 people)                                                                                                                                                                                                                                                                                                        | 2.15       | 2.69          | 4.17     | 0.01           | 0.06                      | 0.07                          | 1.78       | 1.75              | 185.00   |
| <b>log-transformed variables</b>                                                                                                                                                                                                                                                                                                     |            |               |          |                |                           |                               |            |                   |          |
| s( log exports percent GDP)                                                                                                                                                                                                                                                                                                          | 4.62       | 5.69          | 2.82     | 0.02           | 0.07                      | 0.10                          | 1.74       | 1.68              | 177.00   |
| s( log imports percent GDP)                                                                                                                                                                                                                                                                                                          | 2.85       | 3.62          | 13.66    | <0.01          | 0.22                      | 0.23                          | 1.46       | 1.43              | 180.00   |
| s( log food exports percent)                                                                                                                                                                                                                                                                                                         | 3.18       | 3.93          | 5.09     | <0.01          | 0.10                      | 0.12                          | 1.74       | 1.70              | 171.00   |
| s( log GDP per capita)                                                                                                                                                                                                                                                                                                               | 5.79       | 6.98          | 3.74     | <0.01          | 0.11                      | 0.14                          | 1.73       | 1.66              | 184.00   |
| s( log national income per capita)                                                                                                                                                                                                                                                                                                   | 5.43       | 6.58          | 5.19     | <0.01          | 0.15                      | 0.18                          | 1.66       | 1.60              | 183.00   |
| s( log health expenditure per capita)                                                                                                                                                                                                                                                                                                | 2.45       | 3.07          | 9.86     | <0.01          | 0.15                      | 0.16                          | 1.64       | 1.61              | 178.00   |
| s( log Nurses midwives per 1000 people)                                                                                                                                                                                                                                                                                              | 6.71       | 7.81          | 3.04     | <0.01          | 0.11                      | 0.15                          | 1.50       | 1.43              | 166.00   |
| s( log GNI per capita Atlas)                                                                                                                                                                                                                                                                                                         | 2.50       | 3.12          | 7.98     | <0.01          | 0.12                      | 0.14                          | 1.64       | 1.61              | 176.00   |
| s( log pig)                                                                                                                                                                                                                                                                                                                          | 2.75       | 3.50          | 46.27    | <0.01          | 0.54                      | 0.55                          | 0.85       | 0.82              | 139.00   |
| s( log sheep)                                                                                                                                                                                                                                                                                                                        | 5.02       | 6.14          | 9.95     | <0.01          | 0.27                      | 0.29                          | 1.27       | 1.22              | 160.00   |
| For each model, edf means equivalent degrees of freedom, the percentage of deviance explained (Dev. %), the generalized cross validation (GCV) score, adjusted R squared and the parameters F and P-value are given. The smoothing functions are referred to as s(). Explanatory variables used in each model appear in brackets: S. |            |               |          |                |                           |                               |            |                   |          |
| <b>Parametric coefficients</b>                                                                                                                                                                                                                                                                                                       |            |               |          |                |                           |                               |            |                   |          |

| Variable Name                          | estimate | std. error | t-value | pr (>t) -<br>value | Adjusted<br>R-squared | deviance<br>explained<br>(%) | GCV   | scale est. | n   |
|----------------------------------------|----------|------------|---------|--------------------|-----------------------|------------------------------|-------|------------|-----|
| Agri land percent                      | 0.004    | 0.005      | 0.893   | 0.373              | -0.001                | 0.004                        | 1.928 | 1.908      | 186 |
| Mean annual precipitation              | 0.000    | 0.000      | -1.124  | 0.263              | 0.002                 | 0.008                        | 1.599 | 1.579      | 168 |
| Average population growth<br>percent   | -0.085   | 0.075      | -1.123  | 0.263              | 0.001                 | 0.007                        | 1.923 | 1.903      | 186 |
| GDP percent growth                     | 0.042    | 0.023      | 1.819   | 0.071              | 0.013                 | 0.018                        | 1.883 | 1.862      | 181 |
| GDP per capita percent<br>growth       | 0.048    | 0.019      | 2.544   | 0.012              | 0.030                 | 0.035                        | 1.850 | 1.830      | 179 |
| latitude                               | 0.010    | 0.004      | 2.542   | 0.012              | 0.029                 | 0.034                        | 1.890 | 1.870      | 186 |
| buffalo                                | 0.000    | 0.000      | 1.691   | 0.099              | 0.042                 | 0.065                        | 1.826 | 1.741      | 43  |
| Physicians per 1000 people             | 0.208    | 0.064      | 3.255   | 0.001              | 0.055                 | 0.060                        | 1.624 | 1.605      | 167 |
| Death rate per 1000 people             | 0.038    | 0.038      | 0.987   | 0.325              | 0.000                 | 0.005                        | 1.877 | 1.857      | 185 |
| Log number poor                        | 0.298    | 0.037      | 8.056   | <0.001             | 0.385                 | 0.391                        | 0.916 | 0.898      | 103 |
| Log food imports percent               | -1.562   | 0.175      | -8.909  | <0.001             | 0.317                 | 0.321                        | 1.316 | 1.300      | 170 |
| Log human population<br>density        | 0.017    | 0.074      | 0.229   | 0.819              | -0.005                | 0.000                        | 1.936 | 1.915      | 186 |
| Log mean annual<br>temperature average | -0.225   | 0.143      | -1.576  | 0.117              | 0.009                 | 0.015                        | 1.574 | 1.555      | 165 |
| Log health expenditure<br>percent GDP  | 0.603    | 0.254      | 2.373   | 0.019              | 0.026                 | 0.031                        | 1.860 | 1.839      | 178 |
| Log chicken                            | 0.461    | 0.030      | 15.474  | <0.001             | 0.633                 | 0.636                        | 0.655 | 0.646      | 139 |
| Log horse                              | 0.289    | 0.046      | 6.271   | <0.001             | 0.233                 | 0.239                        | 1.366 | 1.344      | 127 |
| Log poverty index                      | 0.082    | 0.069      | 1.192   | 0.236              | 0.004                 | 0.014                        | 1.483 | 1.454      | 103 |
| Log poverty headcount<br>percent       | 0.089    | 0.075      | 1.183   | 0.240              | 0.004                 | 0.014                        | 1.484 | 1.455      | 103 |
| Log prevalence<br>undernourishment     | -0.359   | 0.112      | -3.218  | 0.002              | 0.055                 | 0.061                        | 1.599 | 1.579      | 161 |
| Log land area                          | 0.347    | 0.032      | 10.692  | <0.001             | 0.380                 | 0.383                        | 1.195 | 1.182      | 186 |
| Log gdp value                          | 0.497    | 0.025      | 19.590  | <0.001             | 0.677                 | 0.678                        | 0.613 | 0.607      | 184 |
| Log surface area                       | 0.343    | 0.033      | 10.460  | <0.001             | 0.368                 | 0.372                        | 1.225 | 1.212      | 187 |
| Log GNI Atlas                          | 0.494    | 0.025      | 19.820  | <0.001             | 0.689                 | 0.691                        | 0.576 | 0.569      | 178 |
| Log goat                               | 0.149    | 0.035      | 4.202   | <0.001             | 0.098                 | 0.103                        | 1.520 | 1.500      | 155 |
| log cattle                             | 0.358    | 0.031      | 11.441  | <0.001             | 0.439                 | 0.442                        | 0.977 | 0.966      | 167 |

**Table S20. Univariable analysis (outcome: logarithm of human pathogen count; winsorised data)**

| <b>Non-parametric coefficients</b>                                                                                                                                                                                                                                                                                                   |                 |                   |                |                           |                           |                               |            |                   |          |
|--------------------------------------------------------------------------------------------------------------------------------------------------------------------------------------------------------------------------------------------------------------------------------------------------------------------------------------|-----------------|-------------------|----------------|---------------------------|---------------------------|-------------------------------|------------|-------------------|----------|
| <b>Variable Name</b>                                                                                                                                                                                                                                                                                                                 | <b>edf</b>      | <b>Ref.df</b>     | <b>F</b>       | <b>p-value</b>            | <b>Adjusted R-squared</b> | <b>deviance explained (%)</b> | <b>GCV</b> | <b>scale est.</b> | <b>n</b> |
| s(hdi rank)                                                                                                                                                                                                                                                                                                                          | 2.42            | 2.99              | 9.82           | <0.01                     | 0.14                      | 0.15                          | 1.59       | 1.56              | 183.00   |
| s(hdi value)                                                                                                                                                                                                                                                                                                                         | 2.67            | 3.30              | 8.95           | <0.01                     | 0.14                      | 0.15                          | 1.59       | 1.56              | 183.00   |
| s(life expectancy)                                                                                                                                                                                                                                                                                                                   | 3.21            | 3.95              | 7.53           | <0.01                     | 0.14                      | 0.15                          | 1.60       | 1.57              | 185.00   |
| s(expected years schooling)                                                                                                                                                                                                                                                                                                          | 2.54            | 3.15              | 13.93          | <0.01                     | 0.20                      | 0.21                          | 1.50       | 1.47              | 184.00   |
| s(mean years schooling)                                                                                                                                                                                                                                                                                                              | 3.65            | 4.50              | 4.34           | <0.01                     | 0.09                      | 0.11                          | 1.69       | 1.64              | 180.00   |
| s(GNI minus HDI rank)                                                                                                                                                                                                                                                                                                                | 2.72            | 3.39              | 3.36           | 0.02                      | 0.06                      | 0.07                          | 1.75       | 1.72              | 177.00   |
| s(duck)                                                                                                                                                                                                                                                                                                                              | 3.34            | 4.07              | 6.29           | <0.01                     | 0.21                      | 0.24                          | 1.09       | 1.04              | 90.00    |
| s(NDI)                                                                                                                                                                                                                                                                                                                               | 2.44            | 3.03              | 3.05           | 0.03                      | 0.05                      | 0.07                          | 1.34       | 1.31              | 154.00   |
| s(NRI)                                                                                                                                                                                                                                                                                                                               | 2.42            | 2.99              | 3.16           | 0.03                      | 0.05                      | 0.07                          | 1.34       | 1.31              | 159.00   |
| s(human population)                                                                                                                                                                                                                                                                                                                  | 7.57            | 8.45              | 27.10          | <0.01                     | 0.55                      | 0.57                          | 0.86       | 0.82              | 186.00   |
| s(average precipitation)                                                                                                                                                                                                                                                                                                             | 5.56            | 6.68              | 1.82           | 0.10                      | 0.05                      | 0.08                          | 1.72       | 1.66              | 182.00   |
| s(birth rate per 1000 people)                                                                                                                                                                                                                                                                                                        | 2.41            | 2.97              | 3.92           | 0.01                      | 0.06                      | 0.07                          | 1.70       | 1.67              | 185.00   |
| <b>log-transformed variables</b>                                                                                                                                                                                                                                                                                                     |                 |                   |                |                           |                           |                               |            |                   |          |
| s( log exports percent GDP)                                                                                                                                                                                                                                                                                                          | 3.72            | 4.57              | 2.78           | 0.02                      | 0.06                      | 0.08                          | 1.67       | 1.62              | 177.00   |
| s( log imports percent GDP)                                                                                                                                                                                                                                                                                                          | 2.42            | 3.00              | 15.76          | <0.01                     | 0.21                      | 0.22                          | 1.41       | 1.38              | 180.00   |
| s( log food exports percent)                                                                                                                                                                                                                                                                                                         | 2.42            | 2.99              | 6.73           | <0.01                     | 0.11                      | 0.12                          | 1.64       | 1.61              | 171.00   |
| s( log national income per capita)                                                                                                                                                                                                                                                                                                   | 5.74            | 6.89              | 4.00           | <0.01                     | 0.12                      | 0.15                          | 1.65       | 1.59              | 183.00   |
| s( log health expenditure per capita)                                                                                                                                                                                                                                                                                                | 2.40            | 2.96              | 10.16          | <0.01                     | 0.15                      | 0.16                          | 1.57       | 1.54              | 178.00   |
| s( log nurses midwives per 1000 people)                                                                                                                                                                                                                                                                                              | 6.16            | 7.27              | 3.58           | <0.01                     | 0.12                      | 0.15                          | 1.42       | 1.36              | 166.00   |
| s( log GNI per capita Atlas)                                                                                                                                                                                                                                                                                                         | 2.31            | 2.86              | 8.82           | <0.01                     | 0.13                      | 0.14                          | 1.56       | 1.53              | 178.00   |
| s( log pig)                                                                                                                                                                                                                                                                                                                          | 2.53            | 3.13              | 49.52          | <0.01                     | 0.53                      | 0.54                          | 0.82       | 0.80              | 139.00   |
| s( log sheep)                                                                                                                                                                                                                                                                                                                        | 4.10            | 5.06              | 11.19          | <0.01                     | 0.26                      | 0.28                          | 1.21       | 1.17              | 160.00   |
| For each model, edf means equivalent degrees of freedom, the percentage of deviance explained (Dev. %), the generalized cross validation (GCV) score, adjusted R squared and the parameters F and P-value are given. The smoothing functions are referred to as s(). Explanatory variables used in each model appear in brackets: S- |                 |                   |                |                           |                           |                               |            |                   |          |
| <b>Parametric coefficients</b>                                                                                                                                                                                                                                                                                                       |                 |                   |                |                           |                           |                               |            |                   |          |
| <b>Variable Name</b>                                                                                                                                                                                                                                                                                                                 | <b>estimate</b> | <b>std. error</b> | <b>t-value</b> | <b>pr (&gt;t) - value</b> | <b>Adjusted R-squared</b> | <b>deviance explained (%)</b> | <b>GCV</b> | <b>scale est.</b> | <b>n</b> |
| Agri land percent                                                                                                                                                                                                                                                                                                                    | 0.004           | 0.005             | 0.820          | 0.413                     | -0.002                    | 0.004                         | 1.845      | 1.826             | 186      |
| Mean annual precipitation                                                                                                                                                                                                                                                                                                            | 0.000           | 0.000             | -1.058         | 0.292                     | 0.001                     | 0.007                         | 1.513      | 1.495             | 168      |

|                                     |        |       |        |        |        |       |       |       |     |
|-------------------------------------|--------|-------|--------|--------|--------|-------|-------|-------|-----|
| Average population growth percent   | -0.069 | 0.087 | -0.792 | 0.429  | -0.002 | 0.003 | 1.846 | 1.826 | 186 |
| GDP percent growth                  | 0.083  | 0.040 | 2.067  | 0.040  | 0.018  | 0.023 | 1.789 | 1.769 | 181 |
| GDP per capita percent growth       | 0.103  | 0.038 | 2.725  | 0.007  | 0.035  | 0.040 | 1.758 | 1.739 | 179 |
| latitude                            | 0.011  | 0.004 | 2.732  | 0.007  | 0.034  | 0.039 | 1.799 | 1.779 | 186 |
| buffalo                             | 0.000  | 0.000 | 1.610  | 0.115  | 0.037  | 0.060 | 1.642 | 1.566 | 43  |
| Physicians per 1000 people          | 0.223  | 0.067 | 3.336  | 0.001  | 0.058  | 0.063 | 1.536 | 1.518 | 167 |
| Death rate per 1000 people          | 0.039  | 0.040 | 0.973  | 0.332  | 0.000  | 0.005 | 1.794 | 1.774 | 185 |
| Log number poor                     | 0.308  | 0.039 | 7.932  | <0.001 | 0.378  | 0.384 | 0.884 | 0.867 | 103 |
| Log food imports percent            | -1.729 | 0.187 | -9.270 | <0.001 | 0.334  | 0.338 | 1.223 | 1.208 | 170 |
| Log human population density        | -0.012 | 0.082 | -0.143 | 0.886  | -0.005 | 0.000 | 1.852 | 1.832 | 186 |
| Log mean annual temperature average | -0.305 | 0.177 | -1.720 | 0.087  | 0.012  | 0.018 | 1.481 | 1.463 | 165 |
| Log health expenditure percent GDP  | 0.637  | 0.270 | 2.362  | 0.019  | 0.025  | 0.031 | 1.776 | 1.756 | 178 |
| Log chicken                         | 0.506  | 0.033 | 15.264 | <0.001 | 0.627  | 0.630 | 0.629 | 0.620 | 139 |
| Log horse                           | 0.300  | 0.048 | 6.209  | <0.001 | 0.230  | 0.236 | 1.288 | 1.268 | 127 |
| Log poverty index                   | 0.086  | 0.070 | 1.220  | 0.225  | 0.005  | 0.015 | 1.414 | 1.386 | 103 |
| Log poverty headcount percent       | 0.091  | 0.078 | 1.179  | 0.241  | 0.004  | 0.014 | 1.415 | 1.388 | 103 |
| Log prevalence undernourishment     | -0.360 | 0.110 | -3.255 | <0.001 | 0.057  | 0.063 | 1.512 | 1.493 | 161 |
| Log land area                       | 0.348  | 0.034 | 10.300 | <0.001 | 0.362  | 0.366 | 1.175 | 1.162 | 186 |
| Log GDP value                       | 0.514  | 0.027 | 18.980 | <0.001 | 0.662  | 0.664 | 0.612 | 0.605 | 184 |
| Log surface area                    | 0.345  | 0.034 | 10.039 | <0.001 | 0.349  | 0.353 | 1.207 | 1.194 | 187 |
| Log GNI Atlas                       | 0.508  | 0.027 | 19.121 | <0.001 | 0.673  | 0.675 | 0.577 | 0.570 | 178 |
| Log goat                            | 0.143  | 0.038 | 3.795  | <0.001 | 0.080  | 0.086 | 1.463 | 1.444 | 155 |
| log cattle                          | 0.399  | 0.036 | 11.176 | <0.001 | 0.427  | 0.431 | 0.947 | 0.935 | 167 |
| Forest area percent                 | -0.003 | 0.004 | -0.664 | 0.508  | -0.003 | 0.002 | 1.848 | 1.828 | 185 |
| longitude                           | 0.002  | 0.002 | 1.164  | 0.246  | 0.002  | 0.007 | 1.858 | 1.838 | 186 |
| Log GDP per capita                  | 0.231  | 0.069 | 3.364  | 0.001  | 0.053  | 0.059 | 1.715 | 1.697 | 184 |
| Log number poor                     | 0.308  | 0.039 | 7.932  | <0.001 | 0.378  | 0.384 | 0.884 | 0.867 | 103 |

**Table S21. Generalized additive model of human pathogens reported from different countries (original data)**

| <b>Outcome:</b> Log (number of human pathogens)   |                                  |                   |                |                    |
|---------------------------------------------------|----------------------------------|-------------------|----------------|--------------------|
| <b>Estimation of Parametric coefficients</b>      |                                  |                   |                |                    |
| <b>Variable</b>                                   | <b>Estimate</b>                  | <b>Std. Error</b> | <b>t value</b> | <b>Pr(&gt; t )</b> |
| Intercept                                         | -8.91                            | 0.63              | -14.12         | <0.001             |
| Log human population density                      | Variable involved in interaction |                   |                |                    |
| Log land area                                     | Variable involved in interaction |                   |                |                    |
| Log mean annual temperature average               | Variable involved in interaction |                   |                |                    |
| <b>Approximate significance of smoothed terms</b> |                                  |                   |                |                    |
| <i>Variable</i>                                   | edf                              | Ref. df           | F              | p-value            |
| s(hdi value)                                      | Variable involved in interaction |                   |                |                    |
| s(nri)                                            | Variable involved in interaction |                   |                |                    |
| s(hdi value):log human population density         | Interaction effect, see Fig. 5   |                   |                |                    |
| s(hdi value):log land area                        | Interaction effect, see Fig. 5   |                   |                |                    |
| s(hdi value):log mean annual temperature average  | Interaction effect, see Fig. 5   |                   |                |                    |
| s(nri):log human population density               | Interaction effect, see Fig. 5   |                   |                |                    |
| ti(hdi value, nri)                                | Interaction effect, see Fig. 5   |                   |                |                    |

R-sq.(adj) = 0.82; Deviance explained = 85%; GCV= 0.32; Scale est. = 0.27; n = 153; edf: Estimated degrees of freedom; Ref. df: Degrees of freedom before smoothing



**Table S22. Generalized additive model of human pathogens reported from different countries (winsorised data–uncontrolled research effort)**

| <b>Outcome:</b> Log (number of human pathogens)    |                                  |                   |                |                    |
|----------------------------------------------------|----------------------------------|-------------------|----------------|--------------------|
| <b>Estimation of Parametric coefficients</b>       |                                  |                   |                |                    |
| <b>Variable</b>                                    | <b>Estimate</b>                  | <b>Std. Error</b> | <b>t value</b> | <b>Pr(&gt; t )</b> |
| Intercept                                          | -8.06                            | 0.67              | -11.99         | <0.001             |
| Log human population density                       | Variable involved in interaction |                   |                |                    |
| Log land area                                      | 0.53                             | 0.04              | 12.38          | <0.001             |
| Log mean annual temperature average                | Variable involved in interaction |                   |                |                    |
| Forest area percentage                             | 0.007                            | 0.003             | 2.78           | 0.006              |
| <b>Approximate significance of smoothed terms</b>  |                                  |                   |                |                    |
| <b>Variable</b>                                    | <b>edf</b>                       | <b>Ref. df</b>    | <b>F</b>       | <b>p-value</b>     |
| s(hdi value)                                       | Variable involved in interaction |                   |                |                    |
| s(gni minus HDI rank)                              | Variable involved in interaction |                   |                |                    |
| s(log sheep)                                       | 3.67                             | 4.29              | 3.19           | 0.01               |
| s(hdi value):log mean annual temperature average   | Interaction effect, Fig. S5      |                   |                |                    |
| s(gni minus HDI rank):log human population density | Interaction effect, Fig. S5      |                   |                |                    |

R-sq.(adj) = 0.82; Deviance explained = 83.9%; GCV= 0.28; Scale est. = 0.25; n = 143; edf: Estimated degrees of freedom; Ref. df: Degrees of freedom before smoothing

Fig. S5. Smoothed curves of the additive effect to the estimated number of human pathogens (winsorized data–uncontrolled research effort) for the individual environmental and social parameters in the Generalized Additive Model. Shaded areas represent 95% confidence intervals. Plots showing the combined effect of the linear and nonparametric contributions as well as significant interactions among smoothed terms have also been presented. P-values for all variables was  $<0.01$ . LMATA: Log mean annual temperature average, LHPD: Log human population density

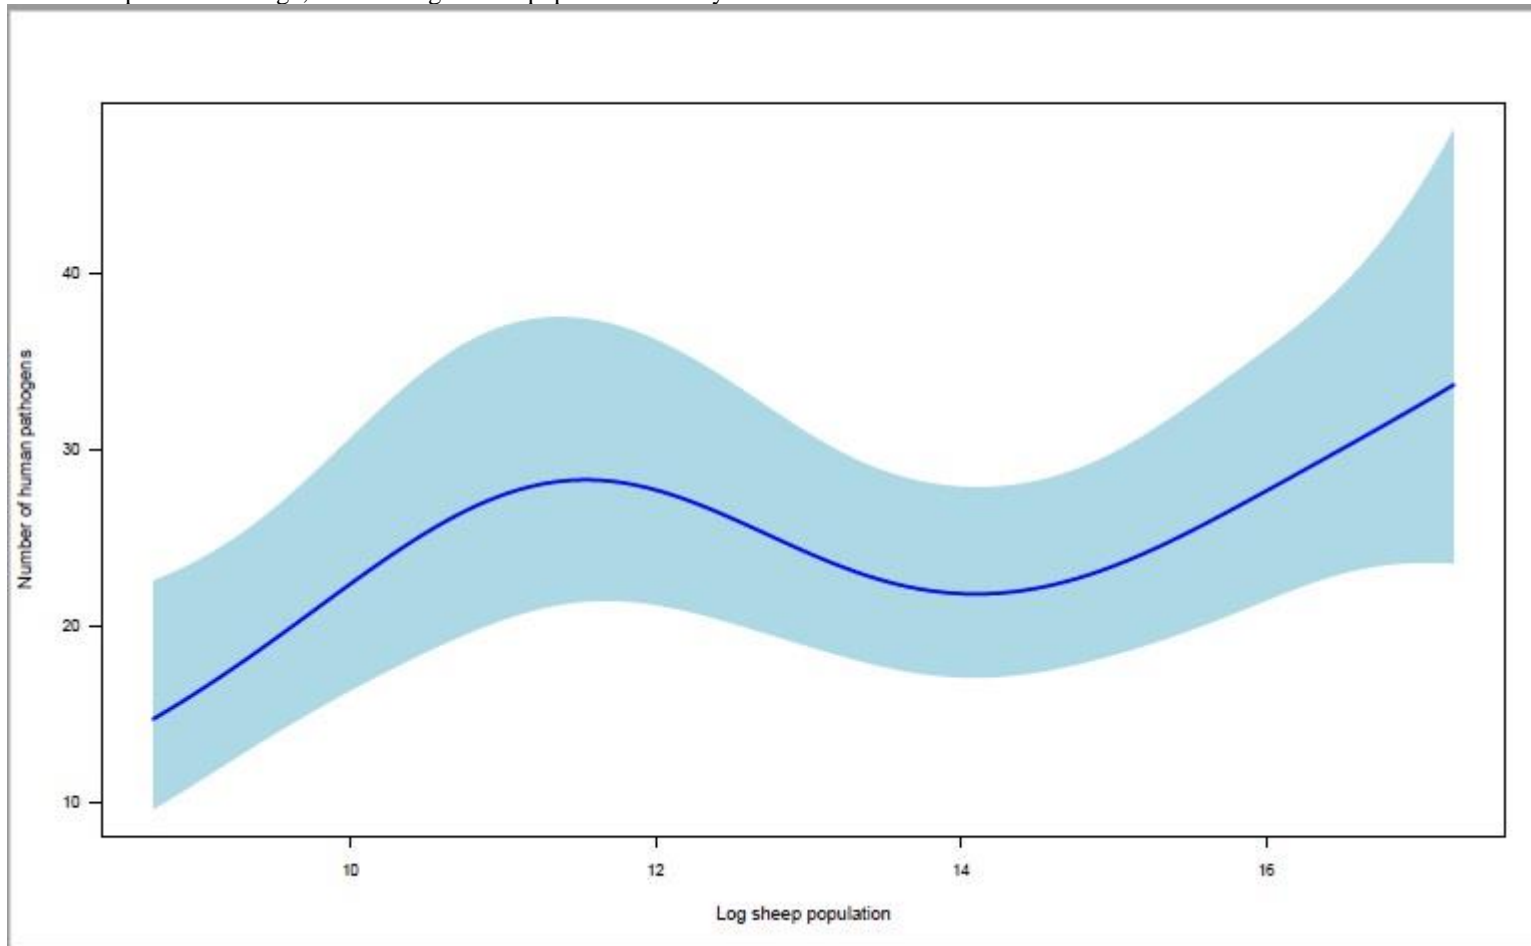

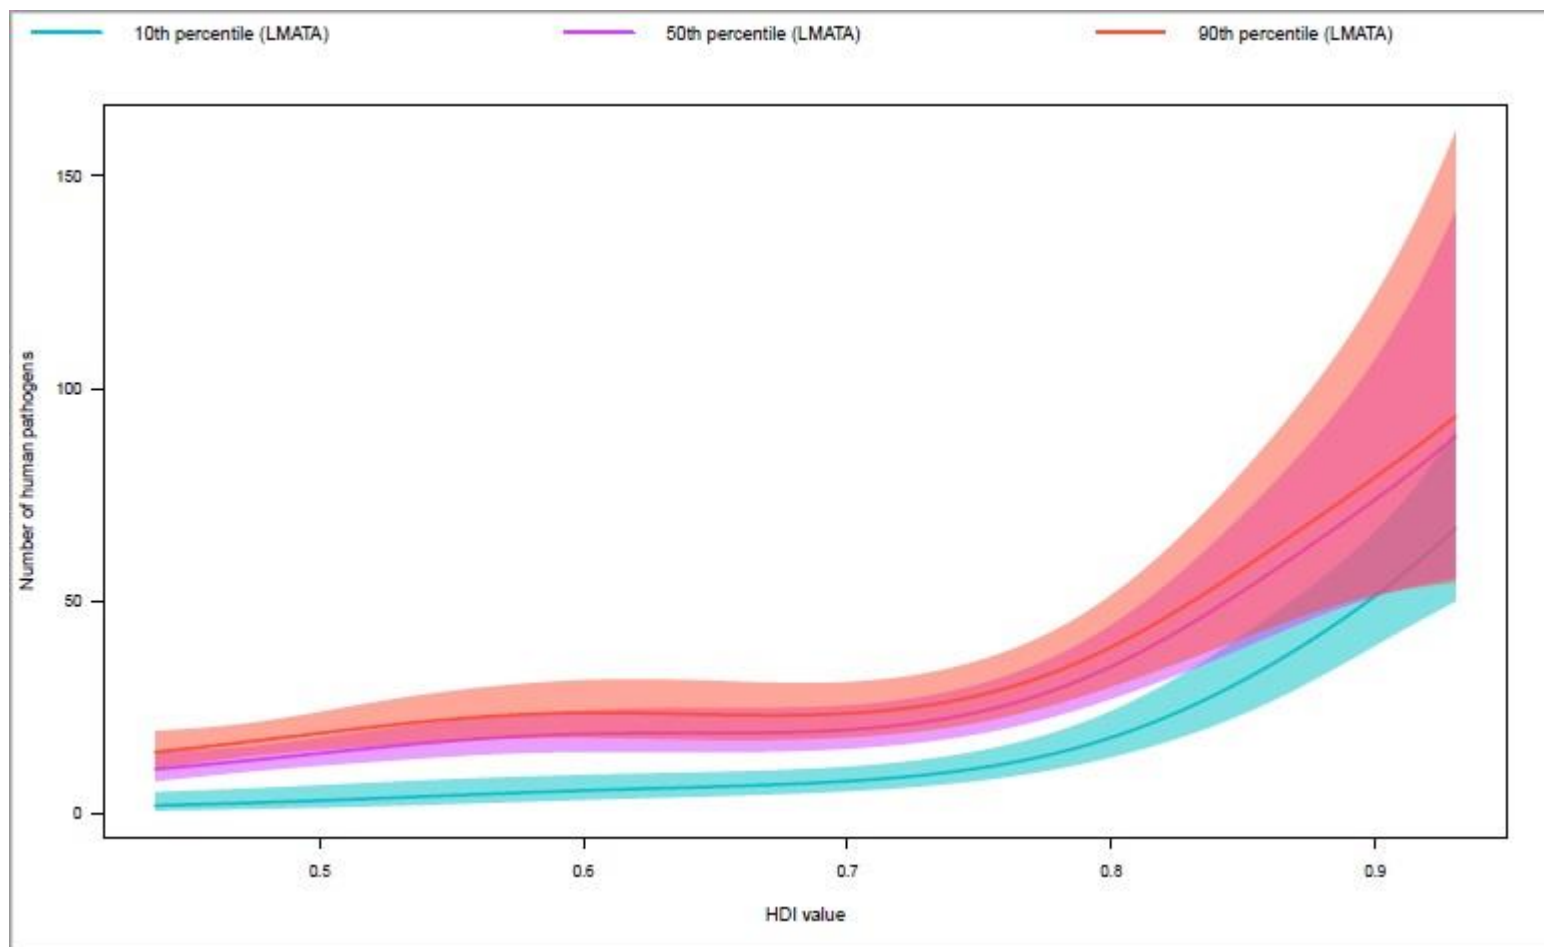

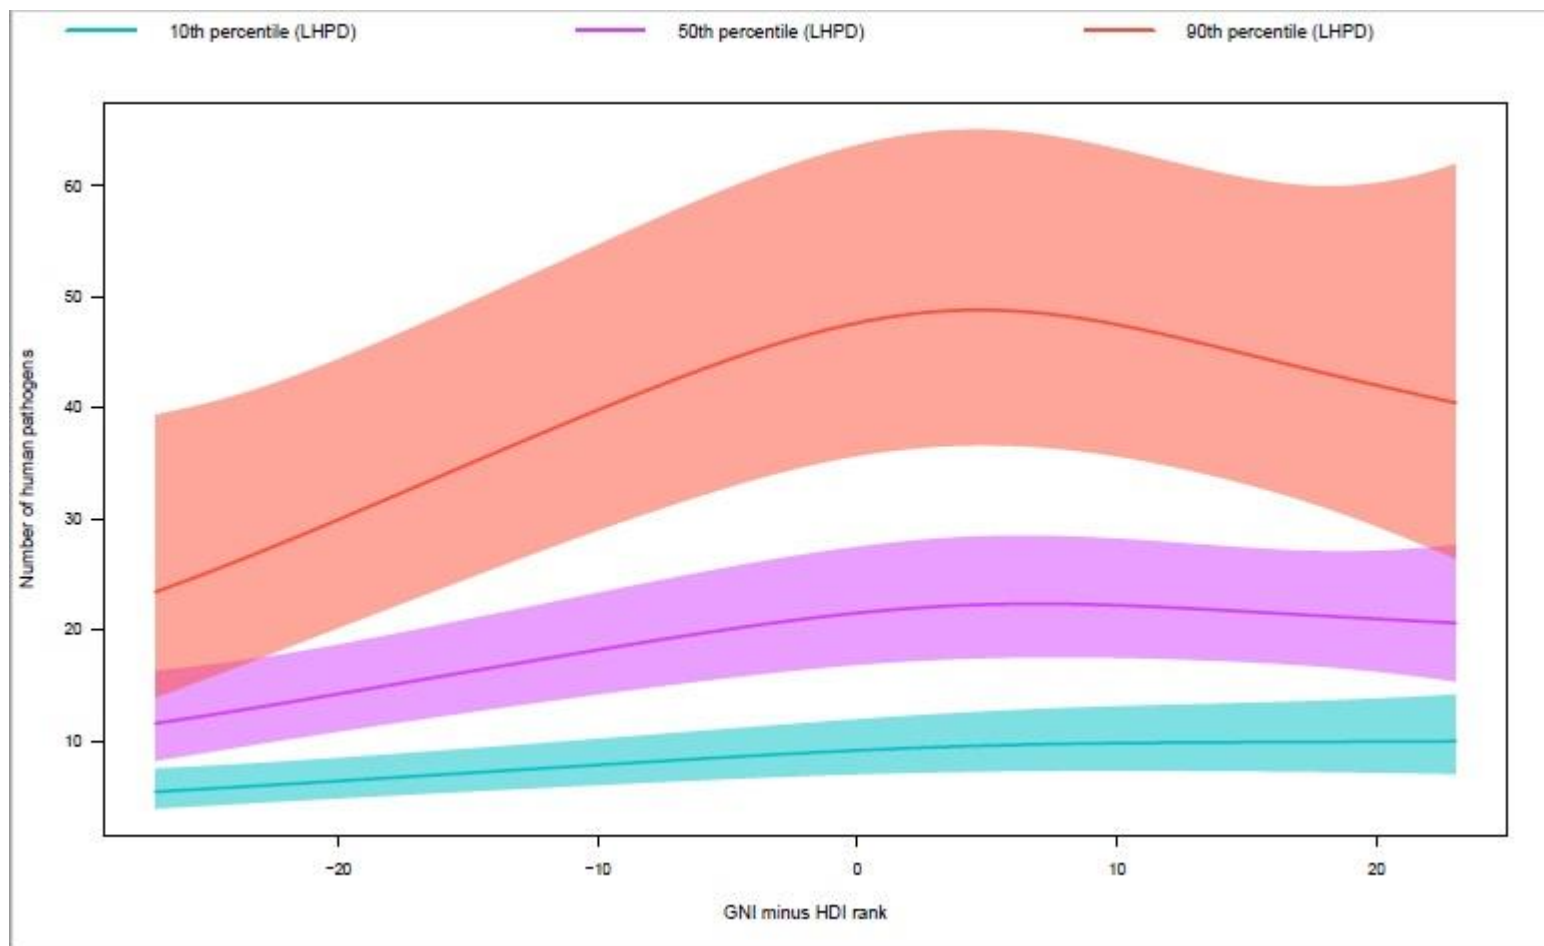

**Table S23. Generalized additive model of human pathogens reported from different countries (original data - after controlling for the research effort)**

| <b>Outcome:</b> Log (number of human pathogens)         |                                  |                   |                |                    |
|---------------------------------------------------------|----------------------------------|-------------------|----------------|--------------------|
| <b>Estimation of Parametric coefficients</b>            |                                  |                   |                |                    |
| <b>Variable</b>                                         | <b>Estimate</b>                  | <b>Std. Error</b> | <b>t value</b> | <b>Pr(&gt; t )</b> |
| Intercept                                               | -9.29                            | 1.00              | -9.32          | <0.001             |
| Log GERD in US dollars                                  | 0.05                             | 0.03              | 1.47           | 0.14               |
| Log Health expenditure<br>in percent GDP                | 0.71                             | 0.22              | 3.27           | 0.002              |
| Log mean annual tempera<br>ture average                 | Variable involved in interaction |                   |                |                    |
| Log land area                                           | Variable involved in interaction |                   |                |                    |
| Log human<br>population density                         | Variable involved in interaction |                   |                |                    |
| <i>Approximate significance of smoothed terms</i>       |                                  |                   |                |                    |
| <i>Variable</i>                                         | <i>edf</i>                       | <i>Ref.df</i>     | <i>F</i>       | <i>p-value</i>     |
| s(hdi value)                                            | Variable involved in interaction |                   |                |                    |
| s(nri)                                                  | Variable involved in interaction |                   |                |                    |
| s(hdi value):log<br>human population<br>density         | Interaction effect, Fig. 6       |                   |                |                    |
| s(hdi value):log mean ann<br>ual temperature<br>average | Interaction effect, Fig. 6       |                   |                |                    |
| s(hdi value):log land<br>area                           | Interaction effect, Fig. 6       |                   |                |                    |
| s(nri):log mean<br>annual temperature<br>average        | Interaction effect, Fig. 6       |                   |                |                    |
| s(nri):log land area                                    | Interaction effect, Fig. 6       |                   |                |                    |

R-sq.(adj) = 0.79; Deviance explained = 82.4%; GCV = 0.33; Scale est. = 0.28

n = 100; edf: Estimated degrees of freedom; Ref.df: Degrees of freedom before smoothing

**Table S24 Generalized additive model of human pathogens reported from different countries (winsorised data - after controlling for the research effort)**

| <b>Outcome:</b> Log (number of human pathogens)           |                                  |                   |                |                    |
|-----------------------------------------------------------|----------------------------------|-------------------|----------------|--------------------|
| <b>Estimation of Parametric coefficients</b>              |                                  |                   |                |                    |
| <b>Variable</b>                                           | <b>Estimate</b>                  | <b>Std. Error</b> | <b>t value</b> | <b>Pr(&gt; t )</b> |
| Intercept                                                 | -8.10                            | 1.44              | -5.61          | <0.001             |
| Log human population density                              | Variable involved in interaction |                   |                |                    |
| Log land area                                             | Variable involved in interaction |                   |                |                    |
| Log health expenditure percent GDP                        | 0.83                             | 0.20              | 4.08           | <0.001             |
| Log mean annual temperature average                       | Variable involved in interaction |                   |                |                    |
| <i>Approximate significance of smoothed terms</i>         |                                  |                   |                |                    |
| <i>Variable</i>                                           | <i>edf</i>                       | <i>Ref.df</i>     | <i>F</i>       | <i>p-value</i>     |
| s(hdi value)                                              | Variable involved in interaction |                   |                |                    |
| s(log gerd US dollar)                                     | Variable involved in interaction |                   |                |                    |
| s(gdp percent growth)                                     | Variable involved in interaction |                   |                |                    |
| s(hdi value):log mean annual temperature average          | Interaction effect, Fig. S6      |                   |                |                    |
| s(log gerd US dollar):log land area                       | Interaction effect, Fig. S6      |                   |                |                    |
| s(gdp percent growth):log human population density        | Interaction effect, Fig. S6      |                   |                |                    |
| s(gdp percent growth):log mean annual temperature average | Interaction effect, Fig. S6      |                   |                |                    |

R-sq.(adj) = 0.82; Deviance explained = 85.6%; GCV = 0.28; Scale est. = 0.23  
n = 102; edf: Estimated degrees of freedom; Ref.df: Degrees of freedom before smoothing

Fig. S6. Smoothed curves of the additive effect to the estimated logarithm of number of human pathogens (winsorized data–uncontrolled research effort) for the individual environmental and social parameters in the Generalized Additive Model. Shaded areas represent 95% confidence intervals. Plots showing the combined effect of the significant interactions among smoothed terms have also been presented. P-value for all variables was <0.01. LMATA: Log mean annual temperature average, LLA: Log land area, LHPD: Log human population density.

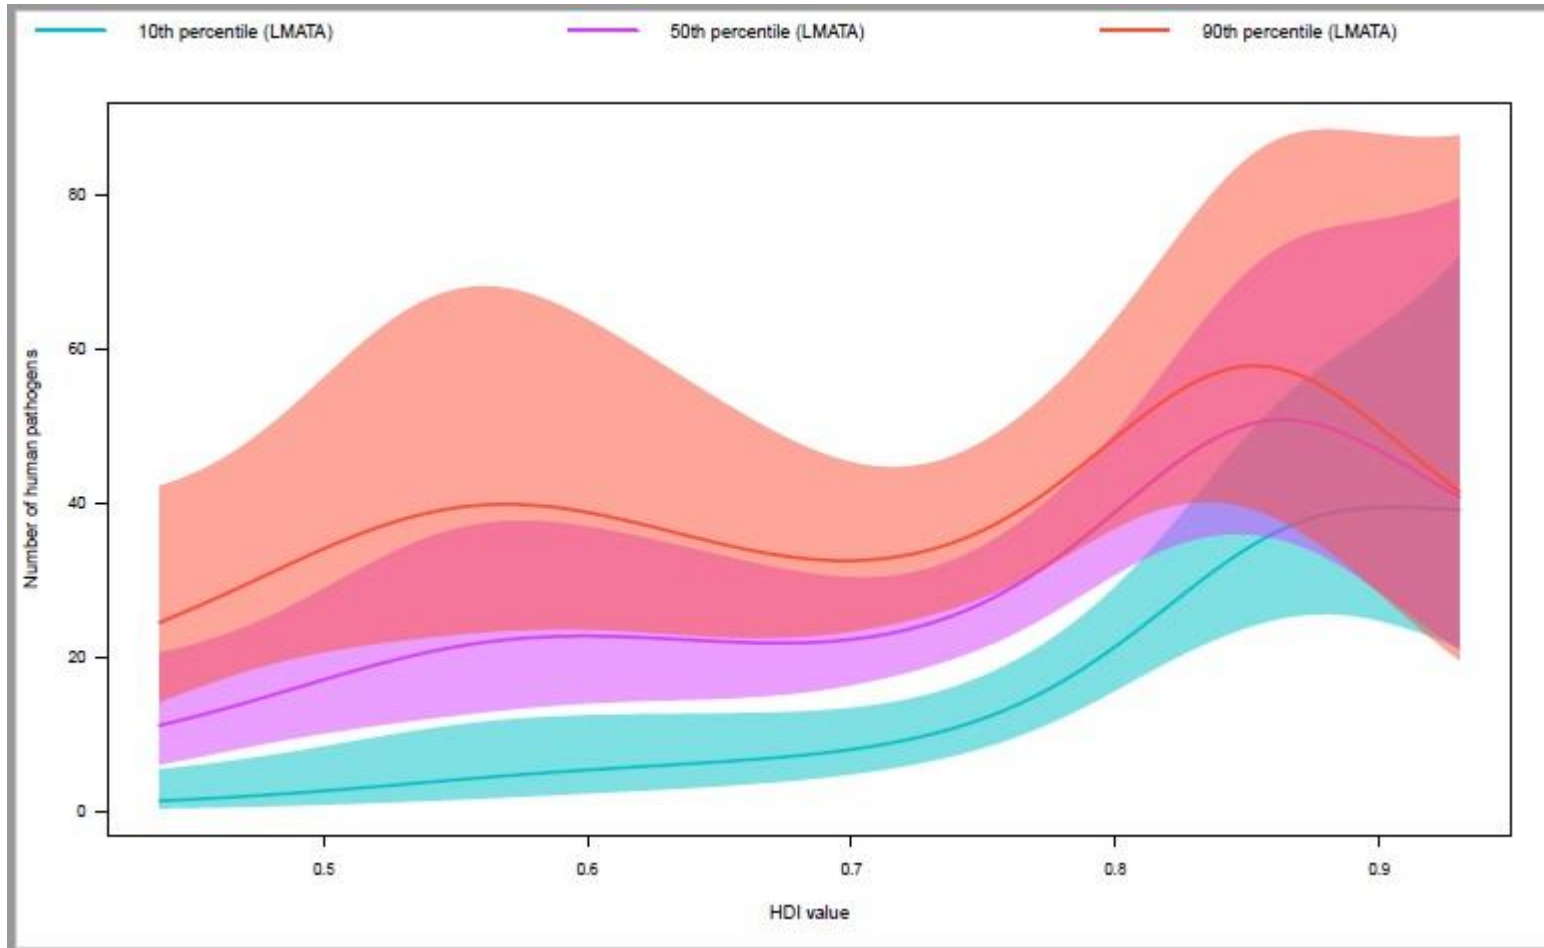

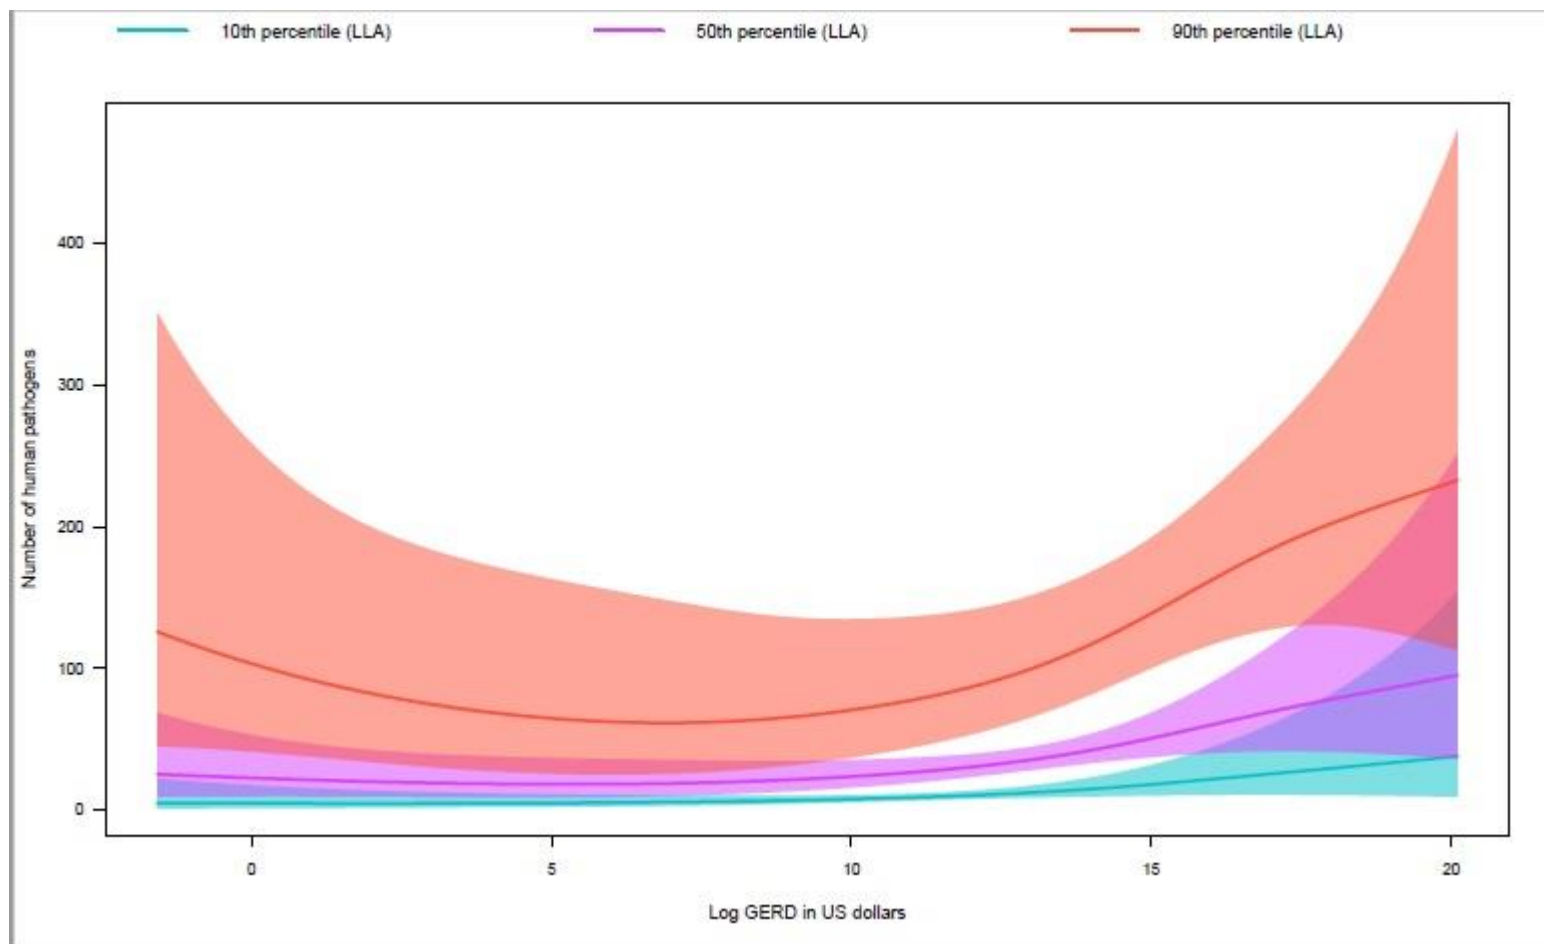



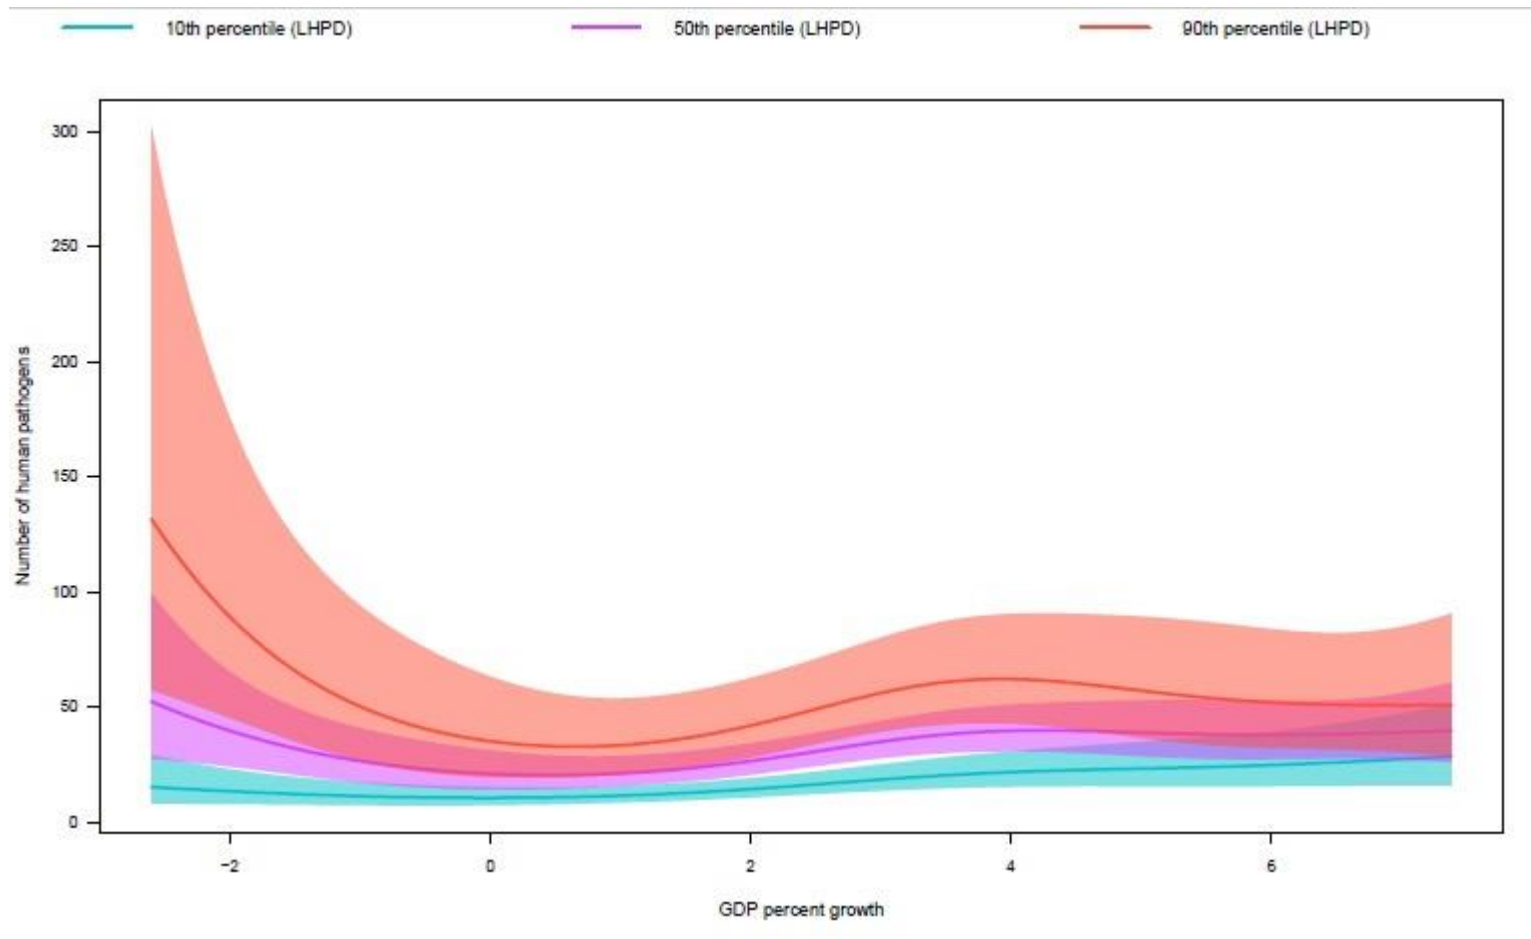

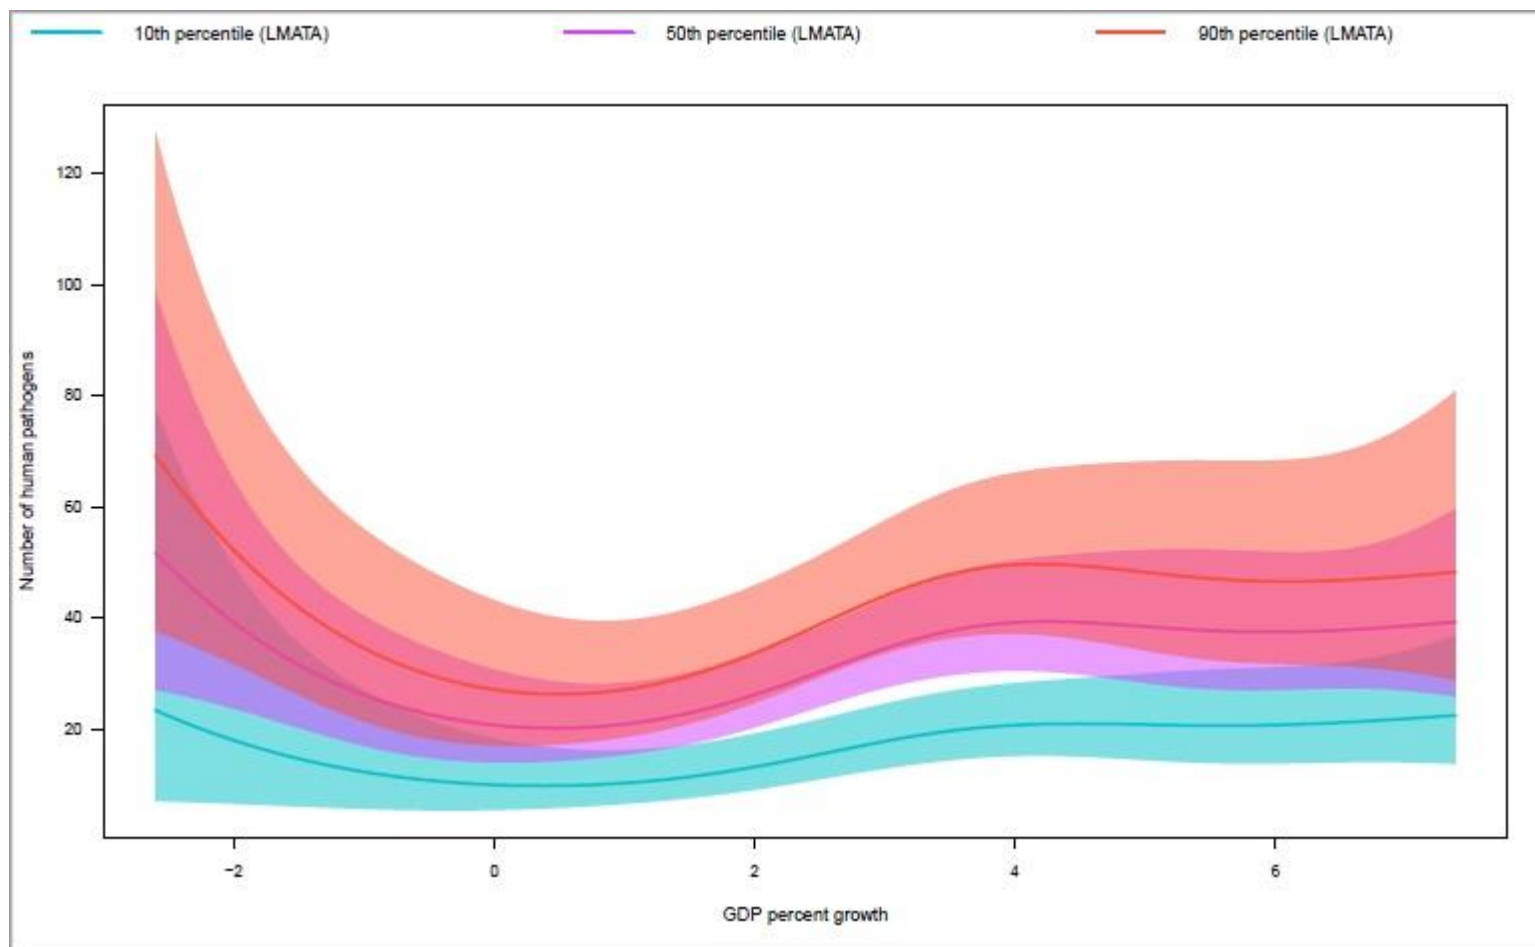

**Table S25. Predictive values (in logarithm of pathogen counts) of zoonotic/human/emerging pathogen diversity estimated for different countries**

| Country                  | Emerging original data | Emerging original data with research effort | Emerging winsorized data | Emerging winsorized data with research effort | Zoonotic original data | Zoonotic original data with research effort | Zoonotic winsorized data | Zoonotic winsorized data with research effort | Human original data | Human original data with research effort | Human winsorized data | Human winsorized data with research effort |
|--------------------------|------------------------|---------------------------------------------|--------------------------|-----------------------------------------------|------------------------|---------------------------------------------|--------------------------|-----------------------------------------------|---------------------|------------------------------------------|-----------------------|--------------------------------------------|
| Afghanistan              | 2.22                   | NA                                          | 2.32                     | NA                                            | 1.97                   | NA                                          | 2.19                     | NA                                            | 1.73                | NA                                       | 2.04                  | NA                                         |
| Albania                  | 1.55                   | NA                                          | 1.55                     | NA                                            | 1.71                   | NA                                          | 1.62                     | NA                                            | 2.13                | NA                                       | 1.75                  | NA                                         |
| Algeria                  | 3.09                   | 3.11                                        | 2.95                     | 3.41                                          | 3.22                   | 3.02                                        | 2.95                     | 3.31                                          | 3.42                | 3.79                                     | 3.64                  | 3.90                                       |
| Angola                   | 2.80                   | NA                                          | 2.41                     | NA                                            | 2.62                   | NA                                          | 2.50                     | NA                                            | 3.39                | NA                                       | 2.92                  | NA                                         |
| Argentina                | 3.73                   | 3.69                                        | 3.71                     | 3.42                                          | 4.60                   | 3.28                                        | 3.81                     | 3.92                                          | 4.50                | 4.26                                     | 4.55                  | 4.40                                       |
| Armenia                  | 1.04                   | 0.62                                        | 1.13                     | 0.72                                          | 0.92                   | 1.33                                        | 1.02                     | 0.91                                          | 1.26                | 1.92                                     | 0.83                  | 1.48                                       |
| Australia                | 4.11                   | 4.20                                        | 4.78                     | 3.75                                          | 5.44                   | 3.98                                        | 4.73                     | 4.34                                          | 4.89                | 4.83                                     | 5.21                  | 4.62                                       |
| Austria                  | 3.11                   | 2.97                                        | 3.06                     | 3.45                                          | 3.14                   | 3.66                                        | 3.40                     | 3.50                                          | 3.82                | 3.99                                     | 4.00                  | 4.31                                       |
| Azerbaijan               | 1.77                   | 1.79                                        | 2.14                     | 1.89                                          | 1.79                   | 1.95                                        | 1.92                     | 1.81                                          | 2.43                | 2.55                                     | 2.32                  | 1.93                                       |
| Bahamas                  | NA                     | NA                                          | 1.25                     | NA                                            | 1.48                   | NA                                          | 1.01                     | NA                                            | 1.94                | NA                                       | NA                    | NA                                         |
| Bangladesh               | 2.74                   | NA                                          | 3.27                     | NA                                            | 2.61                   | NA                                          | 3.52                     | NA                                            | 3.96                | NA                                       | 4.27                  | NA                                         |
| Belarus                  | 2.55                   | 2.16                                        | 2.14                     | 1.94                                          | 2.30                   | 2.54                                        | 2.35                     | 2.38                                          | 2.81                | 2.89                                     | 2.78                  | 2.49                                       |
| Belgium                  | 3.60                   | 3.32                                        | 3.29                     | 3.41                                          | 3.34                   | 3.52                                        | 3.63                     | 3.80                                          | 3.96                | 4.21                                     | 4.15                  | 3.97                                       |
| Belize                   | NA                     | NA                                          | NA                       | NA                                            | 0.82                   | NA                                          | 0.36                     | NA                                            | 0.86                | NA                                       | 0.99                  | NA                                         |
| Benin                    | 2.44                   | NA                                          | 2.29                     | NA                                            | 1.99                   | NA                                          | 1.86                     | NA                                            | 2.94                | NA                                       | 2.96                  | NA                                         |
| Bhutan                   | 0.66                   | NA                                          | 0.37                     | NA                                            | 0.75                   | NA                                          | 0.52                     | NA                                            | 0.72                | NA                                       | 0.35                  | NA                                         |
| Bolivia                  | 2.48                   | NA                                          | NA                       | NA                                            | 3.02                   | NA                                          | 2.13                     | NA                                            | 2.90                | NA                                       | NA                    | NA                                         |
| Bosnia And Herzegovina   | 1.55                   | 1.20                                        | 1.43                     | 1.27                                          | 1.41                   | 1.70                                        | 1.52                     | 1.62                                          | 1.85                | 2.22                                     | 1.63                  | 1.88                                       |
| Botswana                 | 1.36                   | 1.67                                        | 1.73                     | 1.52                                          | 2.76                   | 1.58                                        | 1.14                     | 1.27                                          | 1.57                | 1.63                                     | 1.94                  | 1.93                                       |
| Brazil                   | 4.47                   | 4.30                                        | 3.99                     | 4.42                                          | 4.83                   | 4.90                                        | 4.34                     | 4.83                                          | 5.17                | 5.23                                     | 5.15                  | 5.22                                       |
| Brunei                   | NA                     | NA                                          | NA                       | NA                                            | NA                     | NA                                          | NA                       | NA                                            | 0.69                | NA                                       | NA                    | NA                                         |
| Bulgaria                 | 2.10                   | 2.38                                        | 2.31                     | 2.42                                          | 2.37                   | 2.49                                        | 2.32                     | 2.41                                          | 3.02                | 3.11                                     | 2.78                  | 3.13                                       |
| Burkina Faso             | 2.55                   | 2.56                                        | 2.30                     | 2.69                                          | 2.34                   | 2.25                                        | 2.01                     | 2.18                                          | 2.90                | 2.78                                     | 2.92                  | 2.94                                       |
| Burundi                  | 2.02                   | NA                                          | 2.27                     | NA                                            | 1.67                   | NA                                          | 1.52                     | NA                                            | 2.28                | NA                                       | 2.11                  | NA                                         |
| Cambodia                 | 2.25                   | 2.48                                        | 2.43                     | 2.62                                          | 1.90                   | 2.15                                        | 2.39                     | 2.07                                          | 3.10                | 3.10                                     | 3.26                  | 3.15                                       |
| Cameroon                 | 3.18                   | NA                                          | 2.64                     | NA                                            | 2.98                   | NA                                          | 2.50                     | NA                                            | 3.26                | NA                                       | 3.43                  | NA                                         |
| Canada                   | 3.70                   | NA                                          | NA                       | NA                                            | NA                     | 4.30                                        | NA                       | NA                                            | NA                  | NA                                       | NA                    | NA                                         |
| Central African Republic | 1.85                   | NA                                          | 1.97                     | NA                                            | 2.29                   | NA                                          | 1.32                     | NA                                            | 2.59                | NA                                       | 2.09                  | NA                                         |

|                                  |      |      |      |      |      |      |      |      |      |      |      |      |
|----------------------------------|------|------|------|------|------|------|------|------|------|------|------|------|
| Chad                             | 2.05 | 2.07 | 1.94 | 1.96 | 1.50 | 1.87 | 1.91 | 1.87 | 2.37 | 2.39 | 2.22 | 2.32 |
| Chile                            | 3.31 | 2.99 | 3.24 | 3.17 | 3.81 | 2.94 | 3.66 | 3.64 | 3.98 | 3.61 | 3.62 | 3.72 |
| China                            | 4.64 | 3.78 | 4.20 | 4.11 | 4.24 | 5.69 | 4.72 | 4.84 | 4.94 | 5.30 | 5.00 | 5.10 |
| Colombia                         | 3.26 | 3.11 | 3.34 | 3.21 | 3.84 | 3.09 | 3.57 | 2.79 | 3.78 | 3.40 | 3.83 | 3.74 |
| Comoros                          | NA   | NA   | NA   | NA   | 0.98 | NA   | 0.51 | NA   | 1.40 | NA   | 0.90 | NA   |
| Costa Rica                       | 2.66 | 2.53 | 2.39 | 2.54 | 2.17 | 2.33 | 2.62 | 2.61 | 2.77 | 3.53 | 3.15 | 3.15 |
| Croatia                          | 2.24 | 2.34 | 2.33 | 2.36 | 2.33 | 2.34 | 2.26 | 2.39 | 2.94 | 2.91 | 2.83 | 2.87 |
| Cuba                             | 2.32 | 3.20 | 2.75 | NA   | 3.15 | 2.62 | 2.53 | 2.58 | 3.29 | NA   | 3.08 | NA   |
| Cyprus                           | 1.88 | 2.29 | 2.25 | 2.15 | 2.49 | 1.44 | 1.92 | 1.76 | 2.58 | 2.44 | 2.83 | 2.33 |
| Czech Republic                   | 3.29 | NA   | NA   | NA   | 3.02 | NA   | 3.25 | NA   | 3.96 | NA   | NA   | NA   |
| Democratic Republic Of The Congo | 3.31 | 3.14 | 3.45 | 3.25 | 2.32 | 3.10 | 3.12 | 3.20 | 3.32 | 3.86 | 3.67 | 3.40 |
| Denmark                          | 3.04 | 2.87 | 3.14 | 3.03 | 3.54 | 3.21 | 3.29 | 3.35 | 3.79 | 3.95 | 3.73 | 3.73 |
| Djibouti                         | NA   | NA   | 1.17 | NA   | 0.80 | NA   | 0.25 | NA   | 1.94 | NA   | NA   | NA   |
| Dominica                         | NA   |
| Dominican Republic               | NA   | NA   | 2.56 | NA   | 1.72 | NA   | 2.01 | NA   | 2.53 | NA   | NA   | NA   |
| East Timor                       | NA   | NA   | NA   | NA   | 0.00 | NA   |
| Ecuador                          | 2.72 | 2.73 | 2.57 | 2.71 | 2.93 | 2.87 | 2.86 | 2.97 | 3.24 | 3.63 | 3.15 | 3.53 |
| Egypt                            | 3.03 | 3.23 | 2.99 | 3.04 | 2.94 | 3.32 | 2.93 | 3.15 | 3.64 | 3.50 | 3.26 | 3.86 |
| El Salvador                      | 1.83 | 2.30 | 1.93 | 1.59 | 0.95 | 1.62 | 1.55 | 1.50 | 1.78 | 2.20 | 2.33 | 1.93 |
| Equatorial Guinea                | NA   | NA   | 2.04 | NA   | 0.86 | NA   | 0.96 | NA   | 1.39 | NA   | NA   | NA   |
| Eritrea                          | 1.08 | NA   | 1.72 | NA   | NA   | NA   | 1.12 | NA   | 1.57 | NA   | 1.70 | NA   |
| Estonia                          | 2.17 | 1.90 | 2.04 | 2.02 | 2.33 | 2.04 | 1.85 | 1.78 | 2.51 | 2.43 | 2.69 | 2.63 |
| Ethiopia                         | 3.19 | 3.00 | 3.01 | 3.50 | 2.96 | 2.95 | 3.07 | 3.02 | 3.53 | 3.84 | 3.78 | 3.50 |
| Fiji                             | 1.67 | NA   | 1.15 | NA   | 1.20 | NA   | 1.07 | NA   | 1.57 | NA   | 1.59 | NA   |
| Finland                          | 3.02 | 3.10 | 2.51 | 3.12 | 3.24 | 3.58 | 2.85 | 2.76 | 3.64 | 3.87 | 3.96 | 4.02 |
| France                           | 4.15 | 4.20 | 4.10 | 4.37 | 4.19 | 4.52 | 4.56 | 4.81 | 5.17 | 5.15 | 5.08 | 5.22 |
| Gabon                            | 1.81 | NA   | 1.66 | NA   | 1.64 | NA   | 1.32 | NA   | 2.04 | NA   | 2.35 | NA   |
| Gambia                           | 1.87 | NA   | 1.65 | NA   | 1.40 | NA   | 0.68 | NA   | 1.69 | NA   | 2.09 | NA   |
| Georgia                          | 1.54 | 1.35 | 1.75 | 1.36 | 1.56 | 1.80 | 1.76 | 1.63 | 2.07 | 2.28 | 2.65 | 1.98 |
| Germany                          | 4.01 | 4.26 | 4.10 | 3.98 | 4.14 | 4.72 | 4.92 | 5.05 | 5.30 | 5.31 | 4.93 | 5.27 |
| Ghana                            | 2.95 | NA   | 2.71 | NA   | 2.03 | NA   | 2.41 | NA   | 3.25 | NA   | 3.61 | NA   |
| Greece                           | 2.92 | 3.34 | 3.24 | 3.32 | 3.52 | 3.09 | 3.23 | 3.26 | 4.09 | 3.87 | 3.90 | 3.67 |
| Guatemala                        | 2.68 | 2.33 | 2.38 | 2.02 | 2.29 | 1.98 | 2.29 | 2.16 | 2.74 | 2.77 | 2.98 | 2.46 |
| Guinea                           | 2.31 | NA   | 2.16 | NA   | 2.12 | NA   | 2.05 | NA   | 2.62 | NA   | 2.29 | NA   |

|               |      |       |      |      |      |      |      |      |      |      |      |      |
|---------------|------|-------|------|------|------|------|------|------|------|------|------|------|
| Guinea-Bissau | 1.61 | NA    | 1.52 | NA   | 1.69 | NA   | 0.82 | NA   | 2.11 | NA   | 2.01 | NA   |
| Guyana        | NA   | NA    | 1.24 | NA   | 1.63 | NA   | 0.78 | NA   | 1.54 | NA   | NA   | NA   |
| Haiti         | 2.45 | NA    | 2.31 | NA   | 1.47 | NA   | 1.78 | NA   | 2.87 | NA   | 2.61 | NA   |
| Honduras      | NA   | 2.01  | 2.31 | 2.23 | 1.51 | 1.57 | 1.85 | 1.61 | 2.45 | 2.41 | NA   | 2.56 |
| Hungary       | 2.39 | 2.82  | 2.60 | 2.74 | 2.71 | 2.92 | 2.74 | 2.89 | 3.55 | 3.43 | 3.35 | 3.68 |
| Iceland       | 1.50 | 1.70  | 1.43 | 1.93 | 2.47 | 1.38 | 1.59 | 1.54 | 2.18 | 2.41 | 2.07 | 2.19 |
| India         | 4.23 | 4.51  | 4.18 | 4.19 | 3.93 | 5.00 | 4.60 | 4.63 | 5.72 | 5.40 | 6.05 | 5.26 |
| Indonesia     | 3.69 | 3.73  | 3.89 | 3.46 | 3.51 | 4.21 | 4.18 | 4.13 | 4.46 | 4.44 | 3.90 | 4.30 |
| Iran          | 3.21 | 3.70  | 3.41 | 3.68 | 3.64 | 3.19 | 3.63 | 3.50 | 4.06 | 4.43 | 4.71 | 4.65 |
| Iraq          | 2.44 | 2.41  | 2.77 | 2.15 | 1.92 | 2.32 | 2.38 | 2.35 | 3.04 | 2.61 | 2.97 | 2.43 |
| Ireland       | 2.77 | 2.89  | 3.16 | 2.59 | 3.43 | 2.82 | 3.47 | 3.54 | 3.59 | 3.70 | 3.43 | 3.53 |
| Israel        | 3.07 | 3.22  | 3.37 | 2.92 | 3.29 | 3.37 | 3.36 | 3.36 | 3.91 | 3.80 | 3.73 | 3.97 |
| Italy         | 4.00 | 4.14  | 3.88 | 4.05 | 3.87 | 4.31 | 4.29 | 4.50 | 5.00 | 4.85 | 4.96 | 4.85 |
| Ivory Coast   | 2.70 | NA    | 2.62 | NA   | 2.43 | NA   | 2.35 | NA   | 3.25 | NA   | 2.37 | NA   |
| Jamaica       | 1.76 | NA    | 1.52 | NA   | 0.76 | NA   | 1.33 | NA   | 1.82 | NA   | 1.80 | NA   |
| Japan         | 4.74 | 4.05  | 4.46 | 4.45 | 4.83 | 5.17 | 5.11 | 4.93 | 5.47 | 5.41 | 5.47 | 5.47 |
| Jordan        | 1.81 | 1.89  | 1.91 | 2.06 | 1.27 | 2.18 | 1.77 | 1.88 | 2.17 | 2.42 | 2.24 | 2.48 |
| Kazakhstan    | 2.05 | 2.43  | 2.49 | 1.98 | 2.86 | 2.37 | 2.68 | 2.35 | 2.69 | 3.04 | 2.64 | 2.65 |
| Kenya         | 2.98 | NA    | 3.25 | NA   | 3.14 | NA   | 2.68 | NA   | 3.56 | NA   | 3.75 | NA   |
| Kuwait        | 1.44 | 1.48  | 2.05 | 2.11 | 1.09 | 1.62 | 1.91 | 1.77 | 2.36 | 2.12 | 2.49 | 3.22 |
| Kyrgyzstan    | NA   | NA    | 1.20 | 1.04 | 0.21 | 1.33 | 0.68 | NA   | 1.22 | 1.02 | 1.72 | 1.48 |
| Laos          | 1.96 | NA    | 1.85 | NA   | 1.88 | NA   | 1.83 | NA   | 2.58 | NA   | 2.49 | NA   |
| Latvia        | 2.19 | 1.76  | 1.96 | 1.73 | 2.29 | 1.96 | 1.85 | 1.79 | 2.47 | 2.33 | 2.63 | 2.38 |
| Lebanon       | 1.82 | NA    | 1.76 | NA   | 1.11 | NA   | 1.61 | NA   | 2.27 | NA   | 2.50 | NA   |
| Lesotho       | 0.90 | -0.11 | 1.09 | 0.05 | 0.03 | 0.75 | 0.69 | 0.53 | 0.39 | 0.62 | 0.43 | 0.12 |
| Liberia       | 2.28 | NA    | 2.17 | NA   | 1.99 | NA   | 1.62 | NA   | 1.96 | NA   | 2.18 | NA   |
| Libya         | 1.79 | NA    | 1.94 | NA   | 2.45 | NA   | 1.62 | NA   | 2.05 | NA   | 1.81 | NA   |
| Lithuania     | NA   | 2.11  | NA   | 2.20 | 2.46 | 2.20 | 2.18 | 2.14 | 2.88 | 2.75 | 2.91 | 2.90 |
| Luxembourg    | NA   | 1.78  | NA   | 1.62 | 1.16 | 1.84 | NA   | NA   | NA   | NA   | 1.83 | 1.86 |
| Macedonia     | 1.21 | 0.86  | 1.21 | 0.89 | 0.82 | 1.54 | 1.03 | 1.15 | 1.42 | 1.52 | 1.37 | 0.84 |
| Madagascar    | 2.37 | 2.49  | 3.35 | 2.67 | 2.50 | 1.70 | 2.48 | 2.13 | 2.92 | 2.89 | 3.02 | 2.96 |
| Malawi        | 2.57 | NA    | 2.78 | NA   | 1.81 | NA   | 2.05 | NA   | 2.82 | NA   | 2.67 | NA   |
| Malaysia      | 3.25 | 3.20  | 3.34 | 3.16 | 3.14 | 3.87 | 3.88 | 3.76 | 3.55 | 4.21 | 4.31 | 4.14 |
| Mali          | 2.52 | 2.58  | 2.13 | 2.13 | 2.16 | 2.01 | 2.07 | 2.19 | 2.36 | 2.86 | 2.52 | 3.17 |
| Malta         | NA   | NA    | NA   | NA   | NA   | 0.82 | NA   | NA   | NA   | NA   | NA   | NA   |
| Mauritania    | 1.79 | NA    | 1.62 | NA   | 1.96 | NA   | 1.36 | NA   | 2.12 | NA   | 1.77 | NA   |
| Mauritius     | NA   | 1.68  | NA   | 1.50 | 0.50 | 1.20 | NA   | NA   | NA   | NA   | 1.88 | 1.78 |
| Mexico        | 3.90 | 4.06  | 3.82 | 3.89 | 3.43 | 4.13 | 3.88 | 3.86 | 4.51 | 4.51 | 4.49 | 4.58 |

|                       |      |      |      |      |      |      |      |      |      |      |      |      |
|-----------------------|------|------|------|------|------|------|------|------|------|------|------|------|
| Moldova               | 1.09 | NA   | NA   | NA   | 0.65 | NA   | 0.99 | NA   | 1.28 | NA   | NA   | NA   |
| Mongolia              | NA   | NA   | NA   | NA   | NA   | 1.33 | NA   | NA   | NA   | NA   | NA   | NA   |
| Morocco               | 2.86 | NA   | 2.47 | NA   | 2.33 | NA   | 2.27 | NA   | 2.99 | NA   | 3.25 | NA   |
| Mozambique            | 2.37 | 2.33 | 2.65 | 2.14 | 1.79 | 2.40 | 2.36 | 2.22 | 3.05 | 3.02 | 3.08 | 2.59 |
| Myanmar               | 2.65 | 3.02 | 2.69 | 2.97 | 3.01 | 2.46 | 3.06 | 2.70 | 3.81 | 3.54 | 3.31 | 3.48 |
| Namibia               | 1.34 | 1.43 | 1.08 | 1.74 | 2.43 | 1.41 | 0.98 | 1.13 | 1.62 | 1.63 | 1.75 | 1.88 |
| Nepal                 | 2.33 | NA   | 2.59 | NA   | 2.49 | NA   | 2.37 | NA   | 2.58 | NA   | 2.74 | NA   |
| Netherlands           | 3.25 | 3.49 | 3.52 | 3.34 | 3.35 | 3.62 | 3.94 | 4.07 | 4.27 | 4.45 | 4.13 | 4.49 |
| New Zealand           | 3.32 | 2.86 | 3.19 | 3.10 | 4.20 | 2.90 | 3.38 | 3.01 | 3.70 | 3.77 | 4.07 | 3.68 |
| Nicaragua             | 2.27 | 1.73 | 2.23 | 1.90 | 1.88 | 1.56 | 1.77 | 1.65 | 2.32 | 2.39 | 2.53 | 2.39 |
| Niger                 | 2.30 | NA   | 2.33 | NA   | 1.56 | NA   | 1.90 | NA   | 2.62 | NA   | 2.85 | NA   |
| Nigeria               | 3.83 | NA   | 3.36 | NA   | 3.32 | NA   | 3.54 | NA   | 4.40 | NA   | 3.91 | NA   |
| Norway                | 2.86 | 3.14 | 2.61 | 2.70 | 3.35 | 3.32 | 3.22 | 3.15 | 3.99 | 3.53 | 3.91 | 3.58 |
| Oman                  | 1.85 | 1.85 | 2.23 | 2.18 | 2.71 | 1.85 | 2.35 | 2.08 | 2.35 | 2.54 | 2.77 | 2.41 |
| Pakistan              | 3.25 | 3.40 | 3.12 | 3.22 | 2.75 | 3.38 | 3.24 | 3.11 | 3.89 | 3.78 | 3.88 | 3.79 |
| Panama                | 2.49 | 2.22 | 2.39 | 2.39 | 2.36 | 1.85 | 2.42 | 2.31 | 3.06 | 3.10 | 3.01 | 2.83 |
| Papua New Guinea      | NA   | 2.54 | 2.21 | 2.10 | NA   | 1.93 | 2.33 | 1.99 | 3.23 | 2.45 | NA   | 2.36 |
| Paraguay              | 2.15 | 1.92 | 2.16 | 2.08 | 2.33 | 1.94 | 1.81 | 1.98 | 2.37 | 2.45 | 2.50 | 2.24 |
| Peru                  | 3.31 | 2.97 | 3.00 | 3.04 | 3.49 | 2.99 | 3.19 | 3.25 | 3.84 | 3.46 | 3.69 | 3.37 |
| Philippines           | 3.45 | 2.95 | 3.30 | 3.04 | 2.65 | 3.13 | 3.53 | 3.41 | 3.76 | 4.02 | 4.10 | 3.62 |
| Poland                | 3.63 | 3.46 | 3.42 | 3.21 | 3.38 | 3.74 | 3.75 | 3.84 | 4.57 | 4.19 | 4.45 | 4.63 |
| Portugal              | 2.94 | 3.39 | 2.90 | 3.30 | 2.92 | 3.17 | 3.04 | 3.35 | 3.81 | 3.82 | 3.73 | 3.93 |
| Qatar                 | 1.62 | 1.07 | 1.10 | 1.29 | 1.75 | 2.06 | 2.23 | 2.07 | 2.15 | 2.20 | 1.70 | 2.00 |
| Republic Of The Congo | 2.18 | NA   | 1.95 | NA   | 2.23 | NA   | 1.66 | NA   | 2.51 | NA   | 2.32 | NA   |
| Romania               | 2.70 | 2.71 | 2.57 | 2.35 | 2.82 | 3.02 | 2.85 | 2.96 | 3.46 | 3.28 | 3.45 | 3.27 |
| Russia                | 3.87 | NA   | NA   | NA   | NA   | 4.67 | NA   | NA   | NA   | NA   | NA   | NA   |
| Rwanda                | 2.14 | NA   | 2.39 | NA   | 1.76 | NA   | 1.74 | NA   | 2.39 | NA   | 2.32 | NA   |
| Saudi Arabia          | 2.72 | 3.41 | 2.68 | 3.31 | 3.61 | 3.54 | 3.85 | 3.75 | 3.98 | 4.29 | 4.09 | 4.24 |
| Senegal               | 2.73 | 2.89 | 2.30 | 3.21 | 2.26 | 2.40 | 1.98 | 2.28 | 2.68 | 2.54 | 3.19 | 3.31 |
| Serbia                | NA   | 2.03 | NA   | 2.02 | 2.07 | 2.40 | NA   | NA   | NA   | NA   | 2.29 | 2.57 |
| Seychelles            | NA   | NA   | NA   | NA   | NA   | 0.48 | NA   | NA   | NA   | NA   | NA   | NA   |
| Sierra Leone          | 2.07 | NA   | 2.06 | NA   | 1.74 | NA   | 1.84 | NA   | 2.18 | NA   | 2.44 | NA   |
| Singapore             | NA   | NA   | NA   | NA   | NA   | 3.04 | NA   | NA   | NA   | NA   | NA   | NA   |
| Slovakia              | 2.71 | 2.22 | NA   | 2.49 | 2.17 | 1.80 | 2.55 | 2.42 | 3.22 | 2.95 | NA   | 2.85 |
| Slovenia              | 2.70 | 2.23 | 2.53 | 2.69 | 2.72 | 2.51 | 2.47 | 2.48 | 2.96 | 3.07 | 3.27 | 3.15 |
| Solomon Islands       | NA   | NA   | 1.59 | NA   | 1.01 | NA   | 0.74 | NA   | 1.59 | NA   | NA   | NA   |

|                         |      |      |      |      |      |      |      |      |      |      |      |      |
|-------------------------|------|------|------|------|------|------|------|------|------|------|------|------|
| South Africa            | 3.01 | 2.98 | 2.96 | 3.19 | 2.79 | 3.49 | 2.73 | 3.11 | 3.36 | 3.71 | 2.85 | 3.69 |
| South Korea             | 3.67 | NA   | 3.83 | NA   | 3.64 | NA   | NA   | NA   | NA   | NA   | 4.73 | NA   |
| Spain                   | 4.05 | 4.14 | 4.05 | 4.00 | 3.96 | 4.16 | 4.26 | 4.49 | 5.06 | 4.81 | 5.03 | 5.09 |
| Sri Lanka               | 2.24 | 2.76 | 2.51 | 2.85 | 2.53 | 2.32 | 2.89 | 2.63 | 3.73 | 3.04 | 3.09 | 2.88 |
| Sudan                   | 3.05 | NA   | 2.88 | NA   | 3.40 | NA   | NA   | NA   | NA   | NA   | 3.49 | NA   |
| Suriname                | 1.07 | NA   | 1.32 | NA   | NA   | NA   | NA   | NA   | 1.48 | NA   | 0.82 | NA   |
| Swaziland               | NA   | NA   | NA   | NA   | 0.52 | NA   | 0.50 | NA   | 0.75 | NA   | 0.58 | NA   |
| Sweden                  | 3.10 | 3.28 | 2.90 | 3.35 | 3.47 | 3.97 | 3.38 | 3.36 | 4.16 | 4.29 | 4.25 | 4.33 |
| Switzerland             | 3.28 | 3.11 | 3.16 | 3.03 | 3.45 | 3.65 | 3.68 | 3.78 | 3.87 | 4.17 | 3.98 | 3.76 |
| Syria                   | 2.20 | 1.84 | 2.36 | NA   | NA   | 1.44 | 1.91 | 1.67 | 2.08 | NA   | 2.71 | NA   |
| Tajikistan              | 1.36 | 0.92 | 1.65 | 1.36 | 1.06 | 1.43 | 1.05 | 0.71 | 1.61 | 1.28 | 1.32 | 1.66 |
| Tanzania                | 3.09 | 3.20 | NA   | 3.28 | 2.92 | 3.00 | 2.83 | 2.86 | 3.50 | 3.72 | NA   | 3.89 |
| Thailand                | 3.08 | 3.54 | 3.36 | 3.55 | 2.85 | 3.77 | 3.51 | 3.45 | 4.29 | 3.91 | 4.19 | 4.20 |
| Togo                    | 2.12 | 2.53 | 2.54 | 2.59 | 1.19 | 1.41 | 1.64 | 1.78 | 2.82 | 2.31 | 2.30 | 2.88 |
| Trinidad And<br>Tobago  | NA   | 2.17 | 2.09 | 1.65 | NA   | 1.28 | 1.48 | 1.56 | 2.40 | 2.21 | NA   | 2.26 |
| Tunisia                 | 2.11 | 2.32 | 2.07 | 2.25 | 1.83 | 2.23 | 1.95 | 2.25 | 2.47 | 2.63 | 2.66 | 2.67 |
| Turkey                  | 3.37 | 3.38 | 3.26 | 3.02 | 3.52 | 3.89 | 3.49 | 3.67 | 4.08 | 3.89 | 3.78 | 3.99 |
| Turkmenistan            | 1.14 | NA   | 1.85 | NA   | NA   | NA   | 1.38 | NA   | 1.72 | NA   | 1.95 | NA   |
| Uganda                  | 2.71 | 2.92 | 3.05 | 3.14 | 2.57 | 2.19 | 2.63 | 2.60 | 3.28 | 3.57 | 3.09 | 3.56 |
| Ukraine                 | 2.37 | 2.17 | 2.33 | 2.43 | 2.62 | 2.95 | 3.00 | 3.14 | 3.42 | 3.17 | 2.69 | 2.98 |
| United Arab<br>Emirates | 2.30 | 1.77 | 2.10 | 1.93 | 2.72 | 2.95 | 3.09 | 2.94 | 2.95 | 3.12 | 2.69 | 2.89 |
| United<br>Kingdom       | 4.06 | 4.06 | 3.89 | 3.92 | 4.16 | 4.31 | 4.70 | 4.90 | 5.04 | 5.01 | 5.13 | 4.97 |
| United States           | 5.16 | 4.83 | 5.13 | 5.34 | 5.15 | 5.48 | 5.70 | 5.71 | 6.17 | 6.28 | 5.83 | 6.51 |
| Uruguay                 | 2.00 | 2.49 | 2.23 | 2.45 | 3.25 | 1.91 | 2.25 | 2.39 | 3.09 | 3.03 | 2.67 | 2.95 |
| Uzbekistan              | 1.98 | 1.90 | 2.33 | 2.43 | 2.32 | 2.33 | 2.26 | 2.06 | 2.74 | 2.92 | 2.76 | 3.05 |
| Vanuatu                 | 0.75 | NA   | 1.17 | NA   | 0.59 | NA   |
| Venezuela               | 3.27 | 3.34 | 3.06 | 3.26 | 3.79 | 3.67 | 3.22 | 3.50 | 4.05 | 3.42 | 4.03 | NA   |
| Vietnam                 | NA   | 2.91 | 3.06 | 3.14 | 1.90 | 3.64 | 3.30 | 3.24 | 3.88 | 4.01 | NA   | 3.92 |
| Yemen                   | NA   | NA   | NA   | NA   | 1.62 | NA   | 2.14 | NA   | 2.52 | NA   | 2.82 | NA   |
| Zambia                  | 2.70 | NA   | 2.43 | NA   | 2.61 | NA   | 2.16 | NA   | 3.01 | NA   | 3.35 | NA   |
| Zimbabwe                | 2.51 | NA   | 2.86 | NA   | 2.48 | NA   | 2.03 | NA   | 2.46 | NA   | 2.89 | NA   |

## References

- FAO. (2016, 12 January 2020). AQUASTAT Main Database. Retrieved from <http://www.fao.org/nr/water/aquastat/data/query/index.html?lang=en>
- Gilbert, M., Nicolas, G., Cinardi, G., Van Boeckel, T., Vanwambeke, S., Wint, G. R., & Robinson, T. (2018a). Global distribution data for cattle, buffaloes, horses, sheep, goats, pigs, chickens and ducks in 2010. *Scientific Data*, 5. doi:10.1038/sdata.2018.227
- Gilbert, M., Nicolas, G., Cinardi, G., Van Boeckel, T. P., Vanwambeke, S., Wint, W. G. R., & Robinson, T. P. (2018b, 17 May 2020). Global buffaloes distribution in 2010 (5 minutes of arc). Harvard Dataverse, V3. Retrieved from <https://doi.org/10.7910/DVN/5U8MWI>
- Gilbert, M., Nicolas, G., Cinardi, G., Van Boeckel, T. P., Vanwambeke, S., Wint, W. G. R., & Robinson, T. P. (2018c, 11 June 2020). Global cattle distribution in 2010 (5 minutes of arc). Harvard Dataverse, V3. Retrieved from <https://doi.org/10.7910/DVN/GIVQ75>
- Gilbert, M., Nicolas, G., Cinardi, G., Van Boeckel, T. P., Vanwambeke, S., Wint, W. G. R., & Robinson, T. P. (2018d, 20 May 2020). Global chickens distribution in 2010 (5 minutes of arc). Harvard Dataverse, V3. Retrieved from <https://doi.org/10.7910/DVN/SUFASB>
- Gilbert, M., Nicolas, G., Cinardi, G., Van Boeckel, T. P., Vanwambeke, S., Wint, W. G. R., & Robinson, T. P. (2018e, 24 May 2020). Global ducks distribution in 2010 (5 minutes of arc). Harvard Dataverse, V3. Retrieved from <https://doi.org/10.7910/DVN/ICHCBH>
- Gilbert, M., Nicolas, G., Cinardi, G., Van Boeckel, T. P., Vanwambeke, S., Wint, W. G. R., & Robinson, T. P. (2018f, 20 June 2020). Global goats distribution in 2010 (5 minutes of arc). Harvard Dataverse, V3. Retrieved from <https://doi.org/10.7910/DVN/OCPH42>
- Gilbert, M., Nicolas, G., Cinardi, G., Van Boeckel, T. P., Vanwambeke, S., Wint, W. G. R., & Robinson, T. P. (2018g, 15 June 2020). Global horses distribution in 2010 (5 minutes of arc). Harvard Dataverse, V3. Retrieved from <https://doi.org/10.7910/DVN/7Q52MV>
- Gilbert, M., Nicolas, G., Cinardi, G., Van Boeckel, T. P., Vanwambeke, S., Wint, W. G. R., & Robinson, T. P. (2018h, 10 June 2020). Global pigs distribution in 2010 (5 minutes of arc). Harvard Dataverse, V3. Retrieved from <https://doi.org/10.7910/DVN/33N0JG>
- Gilbert, M., Nicolas, G., Cinardi, G., Van Boeckel, T. P., Vanwambeke, S., Wint, W. G. R., & Robinson, T. P. (2018i, 14 May 2020). Global sheep distribution in 2010 (5 minutes of arc). Retrieved from <https://doi.org/10.7910/DVN/BLWPZN>
- Global biodiversity outlook 1. (2001, 17 June 2020). Annexure 1. Biodiversity information by country. In: Global biodiversity outlook 1.
- Mitchell, T. D., Carter, T. R., Jones, P., & Hulme, M. (2004). *A Comprehensive Set of High-Resolution Grids of Monthly Climate for Europe and the Globe: The Observed Record (1901–2000) and 16 Scenarios (2001–2100)*. Retrieved from [http://ipcc-data.org/docs/tyndall\\_working\\_papers\\_wp55.pdf](http://ipcc-data.org/docs/tyndall_working_papers_wp55.pdf)
- OECD. (2019a, 23 June 2019). Exchange rates (indicator). Retrieved from doi: 10.1787/037ed317-en
- OECD. (2019b, 10 March 2020). Gross domestic spending on R&D (indicator). Retrieved from doi: 10.1787/d8b068b4-en
- UNDESAPD. (2015). United Nations, Department of Economic and Social Affairs, Population Division. World Urbanization Prospects: The 2014 Revision., 1-517. Retrieved from <https://esa.un.org/unpd/wup/Publications/Files/WUP2014-Report.pdf>
- UNDP. (2018). Human development indices and indicators – 2018 statistical update., 1-123. Retrieved from <http://hdr.undp.org/en/2018-update>
- Wardeh, M., Risley, C., McIntyre, M. K., Setzkorn, C., & Baylis, M. (2015). Database of host-pathogen and related species interactions, and their global distribution. *Sci Data*, 2, 150049. doi:10.1038/sdata.2015.49
- WDI. (2016, 30 December 2019). World Development Indicators: Health systems. Retrieved from <http://wdi.worldbank.org/table/2.12>
- WDI. (2017a, 10 April 2020). World Development Indicators, The World Bank. Retrieved from <https://datacatalog.worldbank.org/dataset/world-development-indicators>



WDI. (2017b, 09 May 2020). World Development Indicators: Population dynamics. Retrieved from <http://wdi.worldbank.org/table/2.1>

WDI. (2017c, 04 April 2020). World Development Indicators: Size of the economy. Retrieved from <http://wdi.worldbank.org/table/WV.1>

Supplementary appendix: List of pathogens along with the pathogen classifications (human, emerging and zoonotic) used in the current study.

| country     | country_microbe                      | classificatic | human_mi | zoonotic | emerging |
|-------------|--------------------------------------|---------------|----------|----------|----------|
| afghanistan | pseudomonas aeruginosa               | Bacteria      | yes      | yes      | yes      |
| afghanistan | human immunodeficiency virus 1       | Virus         | yes      | no       | yes      |
| afghanistan | variola virus                        | Virus         | no       | no       | no       |
| afghanistan | hepatitis b virus                    | Virus         | yes      | no       | yes      |
| afghanistan | human immunodeficiency virus 2       | Virus         | yes      | no       | yes      |
| afghanistan | hepatitis c virus                    | Virus         | yes      | no       | yes      |
| afghanistan | hepatitis e virus                    | Virus         | yes      | yes      | yes      |
| afghanistan | leishmania tropica                   | Protozoa      | yes      | yes      | no       |
| afghanistan | foot-and-mouth disease virus         | Virus         | no       | no       | no       |
| afghanistan | trichophyton violaceum               | Fungi         | yes      | yes      | no       |
| afghanistan | measles virus                        | Virus         | yes      | yes      | yes      |
| afghanistan | rabies virus                         | Virus         | yes      | yes      | yes      |
| afghanistan | hepatozoon canis                     | Protozoa      | no       | no       | no       |
| afghanistan | plasmodium vivax                     | Protozoa      | yes      | no       | yes      |
| afghanistan | influenza a virus                    | Virus         | yes      | yes      | yes      |
| afghanistan | lichtheimia corymbifera              | Fungi         | no       | no       | no       |
| afghanistan | human enterovirus c                  | Virus         | yes      | no       | no       |
| afghanistan | fusarium oxysporum                   | Fungi         | yes      | no       | yes      |
| albania     | babesia canis                        | Protozoa      | no       | no       | no       |
| albania     | crimean-congo hemorrhagic fever viru | Virus         | no       | no       | no       |
| albania     | anaplasma phagocytophilum            | Bacteria      | no       | no       | no       |
| albania     | measles virus                        | Virus         | yes      | yes      | yes      |
| albania     | human immunodeficiency virus 1       | Virus         | yes      | no       | yes      |
| albania     | dirofilaria repens                   | Helminth      | yes      | yes      | no       |
| albania     | hepatitis a virus                    | Virus         | yes      | yes      | yes      |
| albania     | salmonella enterica                  | Bacteria      | no       | no       | no       |
| algeria     | bluetongue virus                     | Virus         | no       | no       | no       |
| algeria     | hepatitis e virus                    | Virus         | yes      | yes      | yes      |
| algeria     | hepatitis c virus                    | Virus         | yes      | no       | yes      |
| algeria     | hepatitis a virus                    | Virus         | yes      | yes      | yes      |
| algeria     | echinococcus canadensis              | Helminth      | no       | no       | no       |
| algeria     | foot-and-mouth disease virus         | Virus         | no       | no       | no       |
| algeria     | human immunodeficiency virus 2       | Virus         | yes      | no       | yes      |
| algeria     | leishmania donovani                  | Protozoa      | yes      | yes      | yes      |
| algeria     | mycobacterium tuberculosis           | Bacteria      | yes      | yes      | yes      |
| algeria     | epizootic hemorrhagic disease virus  | Virus         | no       | no       | no       |
| algeria     | escherichia coli                     | Bacteria      | yes      | yes      | yes      |
| algeria     | bacillus subtilis                    | Bacteria      | yes      | yes      | no       |
| algeria     | rickettsia conorii                   | Bacteria      | yes      | yes      | no       |
| algeria     | sheepox virus                        | Virus         | no       | no       | no       |
| algeria     | pantoea agglomerans                  | Bacteria      | yes      | yes      | no       |
| algeria     | human immunodeficiency virus 1       | Virus         | yes      | no       | yes      |
| algeria     | fasciola hepatica                    | Helminth      | yes      | yes      | no       |
| algeria     | pseudomonas stutzeri                 | Bacteria      | yes      | no       | no       |
| algeria     | echinococcus granulosus              | Helminth      | yes      | yes      | yes      |
| algeria     | rabies virus                         | Virus         | yes      | yes      | yes      |
| algeria     | penicillium polonicum                | Fungi         | no       | no       | no       |
| algeria     | human enterovirus b                  | Virus         | yes      | no       | yes      |
| algeria     | enterobacter cloacae                 | Bacteria      | yes      | yes      | no       |

|                |                                |          |     |     |     |
|----------------|--------------------------------|----------|-----|-----|-----|
| algeria        | sandfly fever naples virus     | Virus    | yes | yes | yes |
| algeria        | agrobacterium tumefaciens      | Bacteria | no  | no  | no  |
| algeria        | neisseria meningitidis         | Bacteria | yes | no  | yes |
| algeria        | fusarium oxysporum             | Fungi    | yes | no  | yes |
| american samoa | wuchereria bancrofti           | Helminth | yes | no  | yes |
| american samoa | dengue virus                   | Virus    | no  | no  | no  |
| andorra        | hepatitis c virus              | Virus    | yes | no  | yes |
| angola         | lake victoria marburgvirus     | Virus    | no  | no  | no  |
| angola         | foot-and-mouth disease virus   | Virus    | no  | no  | no  |
| angola         | candida albicans               | Fungi    | yes | yes | yes |
| angola         | plasmodium falciparum          | Protozoa | yes | no  | yes |
| angola         | african swine fever virus      | Virus    | no  | no  | no  |
| angola         | rift valley fever virus        | Virus    | yes | yes | yes |
| angola         | streptococcus agalactiae       | Bacteria | yes | yes | no  |
| angola         | human enterovirus c            | Virus    | yes | no  | no  |
| angola         | yellow fever virus             | Virus    | yes | yes | yes |
| angola         | hepatitis b virus              | Virus    | yes | no  | yes |
| angola         | hepatitis delta virus          | Virus    | yes | no  | no  |
| angola         | dengue virus                   | Virus    | no  | no  | no  |
| angola         | vibrio parahaemolyticus        | Bacteria | yes | yes | yes |
| angola         | human immunodeficiency virus 1 | Virus    | yes | no  | yes |
| angola         | human immunodeficiency virus 2 | Virus    | yes | no  | yes |
| angola         | measles virus                  | Virus    | yes | yes | yes |
| anguilla       | dengue virus                   | Virus    | no  | no  | no  |
| antarctica     | rhodotorula mucilaginosa       | Fungi    | yes | yes | no  |
| antarctica     | penicillium corylophilum       | Fungi    | no  | no  | no  |
| antarctica     | klebsiella oxytoca             | Bacteria | yes | yes | no  |
| antarctica     | penicillium polonicum          | Fungi    | no  | no  | no  |
| antarctica     | alternaria alternata           | Fungi    | yes | yes | no  |
| antarctica     | bacillus megaterium            | Bacteria | no  | no  | no  |
| antarctica     | gibberella intermedia          | Fungi    | no  | no  | no  |
| antarctica     | contraeaecum radiatum          | Helminth | no  | no  | no  |
| antarctica     | pseudoterranova decipiens      | Helminth | yes | no  | no  |
| antarctica     | sporopachydermia lactativora   | Fungi    | no  | no  | no  |
| antarctica     | contraeaecum mirounga          | Helminth | no  | no  | no  |
| antarctica     | penicillium chrysogenum        | Fungi    | yes | no  | no  |
| antarctica     | psychrobacter nivimaris        | Bacteria | no  | no  | no  |
| antarctica     | psychrobacter psychrophilus    | Bacteria | no  | no  | no  |
| antarctica     | kocuria polaris                | Bacteria | no  | no  | no  |
| antarctica     | providencia rettgeri           | Bacteria | yes | yes | no  |
| antarctica     | penicillium commune            | Fungi    | yes | no  | no  |
| antarctica     | bacillus subtilis              | Bacteria | yes | yes | no  |
| antarctica     | bacillus thuringiensis         | Bacteria | yes | no  | no  |
| antarctica     | cryptococcus laurentii         | Fungi    | no  | no  | no  |
| antarctica     | pseudomonas fluorescens        | Bacteria | yes | no  | no  |
| antarctica     | cladosporium cladosporioides   | Fungi    | yes | no  | no  |
| antarctica     | staphylococcus sciuri          | Bacteria | no  | no  | no  |
| antarctica     | chlamydophila psittaci         | Bacteria | yes | yes | no  |
| antarctica     | bacillus pumilus               | Bacteria | yes | no  | no  |
| antarctica     | paracoccus marcusii            | Bacteria | no  | no  | no  |

|                    |                                      |          |     |     |     |
|--------------------|--------------------------------------|----------|-----|-----|-----|
| antarctica         | anisakis pegreffii                   | Helminth | no  | no  | no  |
| antarctica         | staphylococcus equorum               | Bacteria | no  | no  | no  |
| antarctica         | rhodococcus fascians                 | Bacteria | yes | no  | no  |
| antarctica         | bacillus licheniformis               | Bacteria | yes | yes | no  |
| antarctica         | pseudomonas putida                   | Bacteria | yes | no  | no  |
| antarctica         | staphylococcus haemolyticus          | Bacteria | yes | yes | no  |
| antarctica         | psychrobacter glacincola             | Bacteria | no  | no  | no  |
| antarctica         | staphylococcus warneri               | Bacteria | yes | yes | no  |
| antarctica         | epicoccum nigrum                     | Fungi    | no  | no  | no  |
| antarctica         | legionella pneumophila               | Bacteria | yes | no  | yes |
| antarctica         | newcastle disease virus              | Virus    | yes | yes | no  |
| antarctica         | rhodococcus erythropolis             | Bacteria | yes | no  | no  |
| antarctica         | aeromonas bestiarum                  | Bacteria | no  | no  | no  |
| antarctica         | pseudomonas meridiana                | Bacteria | no  | no  | no  |
| antarctica         | micrococcus luteus                   | Bacteria | no  | no  | no  |
| antarctica         | yersinia kristensenii                | Bacteria | yes | yes | no  |
| antigua and barbuc | clavispora lusitaniae                | Fungi    | no  | no  | no  |
| antigua and barbuc | dengue virus                         | Virus    | no  | no  | no  |
| antigua and barbuc | ehrlichia ruminantium                | Bacteria | no  | no  | no  |
| antigua and barbuc | human immunodeficiency virus 1       | Virus    | yes | no  | yes |
| argentina          | campylobacter fetus                  | Bacteria | yes | yes | yes |
| argentina          | mycoplasma ovis                      | Bacteria | no  | no  | no  |
| argentina          | equine arteritis virus               | Virus    | no  | no  | no  |
| argentina          | torque teno sus virus 2              | Virus    | no  | no  | no  |
| argentina          | rhodococcus erythropolis             | Bacteria | yes | no  | no  |
| argentina          | equine infectious anemia virus       | Virus    | no  | no  | no  |
| argentina          | infectious bursal disease virus      | Virus    | no  | no  | no  |
| argentina          | bovine viral diarrhea virus 1        | Virus    | no  | no  | no  |
| argentina          | brevibacterium casei                 | Bacteria | no  | no  | no  |
| argentina          | andes virus                          | Virus    | yes | yes | yes |
| argentina          | primate t-lymphotropic virus 2       | Virus    | no  | no  | no  |
| argentina          | fusarium chlamydosporum              | Fungi    | yes | no  | no  |
| argentina          | bluetongue virus                     | Virus    | no  | no  | no  |
| argentina          | venezuelan equine encephalitis virus | Virus    | yes | yes | yes |
| argentina          | influenza b virus                    | Virus    | yes | yes | no  |
| argentina          | ajellomyces capsulatus               | Fungi    | no  | no  | no  |
| argentina          | pseudomonas chlororaphis             | Bacteria | no  | no  | no  |
| argentina          | schistosoma mansoni                  | Helminth | yes | yes | yes |
| argentina          | human papillomavirus 16              | Virus    | no  | no  | no  |
| argentina          | fusarium solani                      | Fungi    | yes | yes | yes |
| argentina          | rubella virus                        | Virus    | yes | no  | no  |
| argentina          | leishmania infantum                  | Protozoa | yes | yes | yes |
| argentina          | lactobacillus brevis                 | Bacteria | no  | no  | no  |
| argentina          | hepatitis c virus                    | Virus    | yes | no  | yes |
| argentina          | yersinia pseudotuberculosis          | Bacteria | yes | yes | no  |
| argentina          | weissella paramesenteroides          | Bacteria | no  | no  | no  |
| argentina          | hepatitis b virus                    | Virus    | yes | no  | yes |
| argentina          | yellow fever virus                   | Virus    | yes | yes | yes |
| argentina          | aureobasidium pullulans              | Fungi    | yes | no  | no  |
| argentina          | bovine leukemia virus                | Virus    | no  | no  | no  |

|           |                                   |          |     |     |     |
|-----------|-----------------------------------|----------|-----|-----|-----|
| argentina | enterococcus hirae                | Bacteria | yes | yes | no  |
| argentina | scedosporium apiospermum          | Fungi    | no  | no  | no  |
| argentina | bacillus megaterium               | Bacteria | no  | no  | no  |
| argentina | west Nile virus                   | Virus    | yes | yes | yes |
| argentina | human herpesvirus 8               | Virus    | yes | no  | yes |
| argentina | primate t-lymphotropic virus 1    | Virus    | no  | no  | no  |
| argentina | human respiratory syncytial virus | Virus    | yes | no  | no  |
| argentina | hepatitis e virus                 | Virus    | yes | yes | yes |
| argentina | bacillus thuringiensis            | Bacteria | yes | no  | no  |
| argentina | staphylococcus pseudintermedius   | Bacteria | no  | no  | no  |
| argentina | neisseria gonorrhoeae             | Bacteria | yes | no  | yes |
| argentina | bordetella pertussis              | Bacteria | yes | no  | yes |
| argentina | st. louis encephalitis virus      | Virus    | yes | yes | yes |
| argentina | babesia bovis                     | Protozoa | yes | yes | no  |
| argentina | pichia kudriavzevii               | Fungi    | no  | no  | no  |
| argentina | kluyvera ascorbata                | Bacteria | yes | yes | no  |
| argentina | trypanosoma cruzi                 | Protozoa | yes | yes | yes |
| argentina | pseudomonas fluorescens           | Bacteria | yes | no  | no  |
| argentina | ehrlichia canis                   | Bacteria | no  | no  | no  |
| argentina | malassezia sympodialis            | Fungi    | yes | yes | no  |
| argentina | mansonella ozzardi                | Helminth | yes | no  | no  |
| argentina | pseudomonas aeruginosa            | Bacteria | yes | yes | yes |
| argentina | pseudomonas putida                | Bacteria | yes | no  | no  |
| argentina | human picobirnavirus              | Virus    | no  | no  | no  |
| argentina | babesia bigemina                  | Protozoa | no  | no  | no  |
| argentina | leishmania braziliensis           | Protozoa | yes | yes | no  |
| argentina | helicobacter pylori               | Bacteria | yes | yes | no  |
| argentina | schizophyllum commune             | Fungi    | yes | no  | no  |
| argentina | actinomyces oris                  | Bacteria | no  | no  | no  |
| argentina | human papillomavirus 49           | Virus    | no  | no  | no  |
| argentina | leuconostoc mesenteroides         | Bacteria | no  | no  | no  |
| argentina | yersinia enterocolitica           | Bacteria | yes | yes | yes |
| argentina | human immunodeficiency virus 2    | Virus    | yes | no  | yes |
| argentina | echinococcus ortleppi             | Helminth | no  | no  | no  |
| argentina | chlamydia trachomatis             | Bacteria | yes | yes | yes |
| argentina | rickettsia massiliae              | Bacteria | yes | yes | no  |
| argentina | chlamydomyces pecorum             | Bacteria | no  | no  | no  |
| argentina | candida dubliniensis              | Fungi    | yes | no  | no  |
| argentina | hepatitis delta virus             | Virus    | yes | no  | no  |
| argentina | anaplasma phagocytophilum         | Bacteria | no  | no  | no  |
| argentina | haemophilus parasuis              | Bacteria | no  | no  | no  |
| argentina | lactobacillus plantarum           | Bacteria | no  | no  | no  |
| argentina | clostridium botulinum             | Bacteria | yes | yes | yes |
| argentina | human adenovirus c                | Virus    | yes | no  | no  |
| argentina | torque teno sus virus 1           | Virus    | no  | no  | no  |
| argentina | bacillus mycoides                 | Bacteria | yes | no  | no  |
| argentina | anaplasma marginale               | Bacteria | no  | no  | no  |
| argentina | echinococcus canadensis           | Helminth | no  | no  | no  |
| argentina | human adenovirus d                | Virus    | yes | no  | no  |
| argentina | human enterovirus c               | Virus    | yes | no  | no  |

|           |                                     |          |     |     |     |
|-----------|-------------------------------------|----------|-----|-----|-----|
| argentina | pseudallescheria boydii             | Fungi    | no  | no  | no  |
| argentina | influenza a virus                   | Virus    | yes | yes | yes |
| argentina | rotavirus a                         | Virus    | yes | yes | yes |
| argentina | citrobacter freundii                | Bacteria | yes | yes | no  |
| argentina | bovine herpesvirus 5                | Virus    | no  | no  | no  |
| argentina | sporothrix schenckii                | Fungi    | yes | yes | no  |
| argentina | bacillus amyloliquefaciens          | Bacteria | no  | no  | no  |
| argentina | hammondia heydorni                  | Protozoa | no  | no  | no  |
| argentina | dengue virus                        | Virus    | no  | no  | no  |
| argentina | salmonella enterica                 | Bacteria | no  | no  | no  |
| argentina | selinia pulchra                     | Fungi    | no  | no  | no  |
| argentina | bacillus subtilis                   | Bacteria | yes | yes | no  |
| argentina | canine distemper virus              | Virus    | no  | no  | no  |
| argentina | toxocara canis                      | Helminth | yes | yes | no  |
| argentina | human enterovirus b                 | Virus    | yes | no  | yes |
| argentina | bordetella bronchiseptica           | Bacteria | yes | yes | no  |
| argentina | human herpesvirus 4                 | Virus    | no  | no  | no  |
| argentina | human immunodeficiency virus 1      | Virus    | yes | no  | yes |
| argentina | nosema ceranae                      | Fungi    | no  | no  | no  |
| argentina | toxoplasma gondii                   | Protozoa | yes | yes | yes |
| argentina | phagicola longa                     | Helminth | no  | no  | no  |
| argentina | norwalk virus                       | Virus    | yes | no  | yes |
| argentina | suid herpesvirus 1                  | Virus    | no  | no  | no  |
| argentina | foot-and-mouth disease virus        | Virus    | no  | no  | no  |
| argentina | contraecum ogmorhini                | Helminth | no  | no  | no  |
| argentina | cryptococcus neoformans             | Fungi    | yes | yes | yes |
| argentina | eastern equine encephalitis virus   | Virus    | yes | yes | yes |
| argentina | human adenovirus b                  | Virus    | yes | no  | no  |
| argentina | morganella morgani                  | Bacteria | yes | yes | no  |
| argentina | fonsecaea pedrosoi                  | Fungi    | no  | no  | no  |
| argentina | sapporo virus                       | Virus    | no  | no  | no  |
| argentina | theileria equi                      | Protozoa | no  | no  | no  |
| argentina | lysinibacillus sphaericus           | Bacteria | no  | no  | no  |
| argentina | lecythophora mutabilis              | Fungi    | yes | no  | no  |
| argentina | coccidioides posadasii              | Fungi    | no  | no  | no  |
| argentina | epizootic hemorrhagic disease virus | Virus    | no  | no  | no  |
| argentina | achromobacter xylooxidans           | Bacteria | yes | no  | no  |
| argentina | haemonchus placei                   | Helminth | no  | no  | no  |
| argentina | chlamydomphila psittaci             | Bacteria | yes | yes | no  |
| argentina | stenotrophomonas maltophilia        | Bacteria | no  | no  | no  |
| argentina | acinetobacter baumannii             | Bacteria | yes | no  | no  |
| argentina | human astrovirus                    | Virus    | yes | no  | yes |
| argentina | newcastle disease virus             | Virus    | yes | yes | no  |
| argentina | enterobacter cloacae                | Bacteria | yes | yes | no  |
| argentina | mycobacterium tuberculosis          | Bacteria | yes | yes | yes |
| argentina | acinetobacter junii                 | Bacteria | yes | no  | no  |
| argentina | trichoderma longibrachiatum         | Fungi    | no  | no  | no  |
| argentina | escherichia coli                    | Bacteria | yes | yes | yes |
| argentina | avian coronavirus                   | Virus    | no  | no  | no  |
| argentina | bacillus altitudinis                | Bacteria | no  | no  | no  |

|           |                               |          |     |     |     |
|-----------|-------------------------------|----------|-----|-----|-----|
| argentina | streptococcus pyogenes        | Bacteria | yes | yes | yes |
| argentina | echinococcus granulosus       | Helminth | yes | yes | yes |
| argentina | equid herpesvirus 1           | Virus    | no  | no  | no  |
| argentina | vibrio cholerae               | Bacteria | yes | no  | yes |
| argentina | paracoccidioides brasiliensis | Fungi    | yes | yes | no  |
| argentina | feline panleukopenia virus    | Virus    | no  | no  | no  |
| argentina | streptococcus pneumoniae      | Bacteria | yes | yes | yes |
| argentina | measles virus                 | Virus    | yes | yes | yes |
| argentina | proteus penneri               | Bacteria | yes | yes | no  |
| argentina | classical swine fever virus   | Virus    | no  | no  | no  |
| argentina | rabies virus                  | Virus    | yes | yes | yes |
| argentina | hepatitis a virus             | Virus    | yes | yes | yes |
| argentina | chicken anemia virus          | Virus    | no  | no  | no  |
| argentina | bovine herpesvirus 1          | Virus    | no  | no  | no  |
| argentina | anaplasma platys              | Bacteria | no  | no  | no  |
| argentina | enterococcus faecium          | Bacteria | yes | yes | yes |
| argentina | saccharomyces cerevisiae      | Fungi    | yes | no  | no  |
| argentina | vaccinia virus                | Virus    | no  | no  | no  |
| argentina | bacillus cereus               | Bacteria | yes | yes | no  |
| argentina | bovine viral diarrhea virus 2 | Virus    | no  | no  | no  |
| argentina | bacillus pumilus              | Bacteria | yes | no  | no  |
| argentina | rhodotorula mucilaginosa      | Fungi    | yes | yes | no  |
| argentina | bovine herpesvirus 4          | Virus    | no  | no  | no  |
| argentina | streptococcus mitis           | Bacteria | yes | no  | no  |
| argentina | pseudallescheria angusta      | Fungi    | no  | no  | no  |
| argentina | staphylococcus aureus         | Bacteria | yes | yes | yes |
| armenia   | human enterovirus c           | Virus    | yes | no  | no  |
| armenia   | lactobacillus helveticus      | Bacteria | no  | no  | no  |
| armenia   | human adenovirus c            | Virus    | yes | no  | no  |
| armenia   | leishmania turanica           | Protozoa | no  | no  | no  |
| armenia   | yersinia pestis               | Bacteria | yes | yes | yes |
| aruba     | cryptococcus gattii           | Fungi    | no  | no  | no  |
| aruba     | dengue virus                  | Virus    | no  | no  | no  |
| australia | epidermophyton floccosum      | Fungi    | yes | yes | no  |
| australia | bivesicula unexpecta          | Helminth | no  | no  | no  |
| australia | scopulariopsis brevicaulis    | Fungi    | yes | yes | no  |
| australia | lankatrema mannarensis        | Helminth | no  | no  | no  |
| australia | pearsonellum pygmaeus         | Helminth | no  | no  | no  |
| australia | torque teno sus virus 1       | Virus    | no  | no  | no  |
| australia | human herpesvirus 1           | Virus    | no  | no  | no  |
| australia | mannheimia haemolytica        | Bacteria | no  | no  | no  |
| australia | iobothrium elegans            | Helminth | no  | no  | no  |
| australia | fusarium chlamydosporum       | Fungi    | yes | no  | no  |
| australia | pseudotobothrium dipsacum     | Helminth | no  | no  | no  |
| australia | plectosphaerella cucumerina   | Fungi    | no  | no  | no  |
| australia | progamotaenia ewersi          | Helminth | no  | no  | no  |
| australia | pasteurella multocida         | Bacteria | yes | yes | no  |
| australia | dirofilaria immitis           | Helminth | yes | yes | no  |
| australia | acinetobacter baumannii       | Bacteria | yes | no  | no  |
| australia | aspergillus fumigatus         | Fungi    | no  | no  | no  |



|           |                                      |          |     |     |     |
|-----------|--------------------------------------|----------|-----|-----|-----|
| australia | human rhinovirus a                   | Virus    | yes | no  | no  |
| australia | arthroderma gypseum                  | Fungi    | no  | no  | no  |
| australia | progamotaenia diaphana               | Helminth | no  | no  | no  |
| australia | cardicola parilus                    | Helminth | no  | no  | no  |
| australia | scedosporium prolificans             | Fungi    | yes | no  | yes |
| australia | pearsonellum corventum               | Helminth | no  | no  | no  |
| australia | aptorchis megapharynx                | Helminth | no  | no  | no  |
| australia | naegleria fowleri                    | Protozoa | yes | no  | no  |
| australia | babesia bovis                        | Protozoa | yes | yes | no  |
| australia | rickettsia australis                 | Bacteria | yes | yes | no  |
| australia | infectious pancreatic necrosis virus | Virus    | no  | no  | no  |
| australia | jc polyomavirus                      | Virus    | no  | no  | no  |
| australia | agrobacterium tumefaciens            | Bacteria | no  | no  | no  |
| australia | clostridium chauvoei                 | Bacteria | yes | yes | no  |
| australia | rubella virus                        | Virus    | yes | no  | no  |
| australia | legionella longbeachae               | Bacteria | yes | no  | no  |
| australia | bovine viral diarrhea virus 1        | Virus    | no  | no  | no  |
| australia | chlamydomyces pecorum                | Bacteria | no  | no  | no  |
| australia | haliotrema aurigae                   | Helminth | no  | no  | no  |
| australia | brachyspira murdochii                | Bacteria | no  | no  | no  |
| australia | progamotaenia effigia                | Helminth | no  | no  | no  |
| australia | human herpesvirus 5                  | Virus    | yes | no  | yes |
| australia | escherichia albertii                 | Bacteria | no  | no  | no  |
| australia | neisseria meningitidis               | Bacteria | yes | no  | yes |
| australia | paracardicoloides yamagutii          | Helminth | no  | no  | no  |
| australia | campylobacter insulaenigrae          | Bacteria | no  | no  | no  |
| australia | epizootic hemorrhagic disease virus  | Virus    | no  | no  | no  |
| australia | human herpesvirus 8                  | Virus    | yes | no  | yes |
| australia | taenia saginata                      | Helminth | yes | yes | no  |
| australia | myrmecridium schulzeri               | Fungi    | no  | no  | no  |
| australia | benedenia sciaenae                   | Helminth | no  | no  | no  |
| australia | schistorchis zancli                  | Helminth | no  | no  | no  |
| australia | streptococcus minor                  | Bacteria | no  | no  | no  |
| australia | trichostrongylus vitrinus            | Helminth | yes | yes | no  |
| australia | cordyceps bassiana                   | Fungi    | no  | no  | no  |
| australia | cellvibrio mixtus                    | Bacteria | no  | no  | no  |
| australia | progamotaenia festiva                | Helminth | no  | no  | no  |
| australia | citrobacter koseri                   | Bacteria | yes | yes | no  |
| australia | mycobacterium ulcerans               | Bacteria | yes | yes | yes |
| australia | neosporea caninum                    | Protozoa | no  | no  | no  |
| australia | anguillicoloides crassus             | Helminth | no  | no  | no  |
| australia | pleorchis uku                        | Helminth | no  | no  | no  |
| australia | pestalotiopsis microspora            | Fungi    | no  | no  | no  |
| australia | entamoeba histolytica                | Protozoa | yes | yes | no  |
| australia | streptococcus canis                  | Bacteria | yes | yes | no  |
| australia | rhabdiopoeus taylori                 | Helminth | no  | no  | no  |
| australia | human adenovirus d                   | Virus    | yes | no  | no  |
| australia | aspergillus niger                    | Fungi    | yes | yes | no  |
| australia | bartonella elizabethae               | Bacteria | yes | yes | no  |
| australia | ancylostoma duodenale                | Helminth | yes | yes | no  |

|           |                                   |          |     |     |     |
|-----------|-----------------------------------|----------|-----|-----|-----|
| australia | staphylococcus epidermidis        | Bacteria | yes | yes | yes |
| australia | phthinomita robertsthomsoni       | Helminth | no  | no  | no  |
| australia | encotyllabe caranxi               | Helminth | no  | no  | no  |
| australia | proenenterum ericotylum           | Helminth | no  | no  | no  |
| australia | encotyllabe chironemi             | Helminth | no  | no  | no  |
| australia | eurotium amstelodami              | Fungi    | no  | no  | no  |
| australia | rhizopus microsporus              | Fungi    | yes | yes | no  |
| australia | dollfusiella geraschmidti         | Helminth | no  | no  | no  |
| australia | influenza a virus                 | Virus    | yes | yes | yes |
| australia | babesia bigemina                  | Protozoa | no  | no  | no  |
| australia | human enterovirus a               | Virus    | yes | no  | no  |
| australia | cardicola orientalis              | Helminth | no  | no  | no  |
| australia | arthroderma simii                 | Fungi    | no  | no  | no  |
| australia | debaryomyces hansenii             | Fungi    | no  | no  | no  |
| australia | grillotia rowei                   | Helminth | no  | no  | no  |
| australia | polystoma gallieni                | Helminth | no  | no  | no  |
| australia | phthinomita hallae                | Helminth | no  | no  | no  |
| australia | babesia canis                     | Protozoa | no  | no  | no  |
| australia | infectious bursal disease virus   | Virus    | no  | no  | no  |
| australia | zeylanurotrema spearei            | Helminth | no  | no  | no  |
| australia | choanocotyle platti               | Helminth | no  | no  | no  |
| australia | hornelliella annandalei           | Helminth | no  | no  | no  |
| australia | chelonobacter oris                | Bacteria | no  | no  | no  |
| australia | prototransversotrema steeri       | Helminth | no  | no  | no  |
| australia | prochristianella clarkeae         | Helminth | no  | no  | no  |
| australia | euryhaliotrematoides annulocirrus | Helminth | no  | no  | no  |
| australia | brachyspira canis                 | Bacteria | no  | no  | no  |
| australia | phthinomita poulini               | Helminth | no  | no  | no  |
| australia | bovine foamy virus                | Virus    | no  | no  | no  |
| australia | trichobilharzia szidati           | Helminth | no  | no  | no  |
| australia | candida orthopsilosis             | Fungi    | no  | no  | no  |
| australia | beak and feather disease virus    | Virus    | no  | no  | no  |
| australia | braya psittacus                   | Helminth | no  | no  | no  |
| australia | fowlpox virus                     | Virus    | no  | no  | no  |
| australia | benedenia sekii                   | Helminth | no  | no  | no  |
| australia | shigella flexneri                 | Bacteria | yes | yes | no  |
| australia | akabane virus                     | Virus    | no  | no  | no  |
| australia | gigantolina magna                 | Helminth | no  | no  | no  |
| australia | enterococcus faecalis             | Bacteria | yes | yes | yes |
| australia | vibrio cholerae                   | Bacteria | yes | no  | yes |
| australia | ankistromececes olsoni            | Helminth | no  | no  | no  |
| australia | zoniolaimus latebrosus            | Helminth | no  | no  | no  |
| australia | sporothrix schenckii              | Fungi    | yes | yes | no  |
| australia | taenia pisiformis                 | Helminth | no  | no  | no  |
| australia | butyrivibrio fibrisolvens         | Bacteria | no  | no  | no  |
| australia | chlamydophila psittaci            | Bacteria | yes | yes | no  |
| australia | contraeaecum eudyptulae           | Helminth | no  | no  | no  |
| australia | progamotaenia macropodis          | Helminth | no  | no  | no  |
| australia | gotocotyla secunda                | Helminth | no  | no  | no  |
| australia | vibrio proteolyticus              | Bacteria | no  | no  | no  |

|           |                                         |          |     |     |     |
|-----------|-----------------------------------------|----------|-----|-----|-----|
| australia | brachyspira innocens                    | Bacteria | no  | no  | no  |
| australia | euryhaliotrematoides grandis            | Helminth | no  | no  | no  |
| australia | phanerochaete sordida                   | Fungi    | no  | no  | no  |
| australia | trimacracanthus aetobatidis             | Helminth | no  | no  | no  |
| australia | epizootic haematopoietic necrosis virus | Virus    | no  | no  | no  |
| australia | eimeria necatrix                        | Protozoa | no  | no  | no  |
| australia | eimeria acervulina                      | Protozoa | no  | no  | no  |
| australia | bordetella holmesii                     | Bacteria | no  | no  | no  |
| australia | shamonda virus                          | Virus    | no  | no  | no  |
| australia | plerurus digitatus                      | Helminth | no  | no  | no  |
| australia | oncomegoides celatus                    | Helminth | no  | no  | no  |
| australia | antorchis pomacanthi                    | Helminth | no  | no  | no  |
| australia | benedenia seriolae                      | Helminth | no  | no  | no  |
| australia | mycoplasma hominis                      | Bacteria | yes | no  | no  |
| australia | west nile virus                         | Virus    | yes | yes | yes |
| australia | raillietina dromaius                    | Helminth | no  | no  | no  |
| australia | cardicola forsteri                      | Helminth | no  | no  | no  |
| australia | pseudomegasolena ishigakiense           | Helminth | no  | no  | no  |
| australia | aptorchis megacetabulus                 | Helminth | no  | no  | no  |
| australia | callitetrarhynchus gracilis             | Helminth | no  | no  | no  |
| australia | anguillicoloides australiensis          | Helminth | no  | no  | no  |
| australia | onchocerca gibsoni                      | Helminth | no  | no  | no  |
| australia | dollfusiella ocallaghani                | Helminth | no  | no  | no  |
| australia | ankistromeces dunwichensis              | Helminth | no  | no  | no  |
| australia | human herpesvirus 3                     | Virus    | no  | no  | no  |
| australia | trypanosoma irwini                      | Protozoa | no  | no  | no  |
| australia | benedenia rohdei                        | Helminth | no  | no  | no  |
| australia | human adenovirus a                      | Virus    | yes | no  | no  |
| australia | sapporo virus                           | Virus    | no  | no  | no  |
| australia | crusziella formosa                      | Helminth | no  | no  | no  |
| australia | trichinella pseudospiralis              | Helminth | yes | yes | no  |
| australia | batrachochytrium dendrobatidis          | Fungi    | no  | no  | no  |
| australia | mycoplasma gallisepticum                | Bacteria | no  | no  | no  |
| australia | chicken anemia virus                    | Virus    | no  | no  | no  |
| australia | provitellus turrum                      | Helminth | no  | no  | no  |
| australia | zoniolaimus mawsonae                    | Helminth | no  | no  | no  |
| australia | rotavirus a                             | Virus    | yes | yes | yes |
| australia | aspergillus versicolor                  | Fungi    | yes | no  | no  |
| australia | ancylostoma tubaeforme                  | Helminth | no  | no  | no  |
| australia | angiostrongylus cantonensis             | Helminth | yes | no  | no  |
| australia | borna disease virus                     | Virus    | yes | yes | no  |
| australia | contraeaecum ogmorhini                  | Helminth | no  | no  | no  |
| australia | murid herpesvirus 4                     | Virus    | no  | no  | no  |
| australia | murid herpesvirus 2                     | Virus    | no  | no  | no  |
| australia | lewia infectoria                        | Fungi    | no  | no  | no  |
| australia | cableia pudica                          | Helminth | no  | no  | no  |
| australia | eimeria mitis                           | Protozoa | no  | no  | no  |
| australia | aeromonas allosaccharophila             | Bacteria | no  | no  | no  |
| australia | pseudohaliotrema sphincteroporos        | Helminth | no  | no  | no  |
| australia | primate t-lymphotropic virus 1          | Virus    | no  | no  | no  |

|           |                                       |          |     |     |     |
|-----------|---------------------------------------|----------|-----|-----|-----|
| australia | avian coronavirus                     | Virus    | no  | no  | no  |
| australia | salmonella enterica                   | Bacteria | no  | no  | no  |
| australia | encephalitozoon cuniculi              | Fungi    | yes | yes | yes |
| australia | homalometron synagris                 | Helminth | no  | no  | no  |
| australia | pseudolacistorhynchus heroniensis     | Helminth | no  | no  | no  |
| australia | bacciger lesteri                      | Helminth | no  | no  | no  |
| australia | trichostrongylus retortaeformis       | Helminth | no  | no  | no  |
| australia | aeromonas aquariorum                  | Bacteria | no  | no  | no  |
| australia | bacillus thuringiensis                | Bacteria | yes | no  | no  |
| australia | taylorella equigenitalis              | Bacteria | no  | no  | no  |
| australia | parotobothrium balli                  | Helminth | no  | no  | no  |
| australia | cladophialophora carrionii            | Fungi    | yes | no  | no  |
| australia | theileria buffeli                     | Protozoa | no  | no  | no  |
| australia | thottapalayam virus                   | Virus    | no  | no  | no  |
| australia | human adenovirus b                    | Virus    | yes | no  | no  |
| australia | krefftascaaris sharpiloi              | Helminth | no  | no  | no  |
| australia | lecithochirium caesionis              | Helminth | no  | no  | no  |
| australia | trypanosoma binneyi                   | Protozoa | no  | no  | no  |
| australia | lobatostoma manteri                   | Helminth | no  | no  | no  |
| australia | cryptosporidium parvum                | Protozoa | yes | yes | yes |
| australia | nosema ceranae                        | Fungi    | no  | no  | no  |
| australia | fusarium solani                       | Fungi    | yes | yes | yes |
| australia | feline immunodeficiency virus         | Virus    | no  | no  | no  |
| australia | streptococcus agalactiae              | Bacteria | yes | yes | no  |
| australia | bivesicula claviformis                | Helminth | no  | no  | no  |
| australia | grillotia pristiophori                | Helminth | no  | no  | no  |
| australia | equine rhinitis b virus               | Virus    | no  | no  | no  |
| australia | parachristianella indonesiensis       | Helminth | no  | no  | no  |
| australia | mouse mammary tumor virus             | Virus    | no  | no  | no  |
| australia | trichostrongylus axei                 | Helminth | yes | yes | no  |
| australia | acremonium strictum                   | Fungi    | yes | no  | no  |
| australia | aeromonas media                       | Bacteria | no  | no  | no  |
| australia | human herpesvirus 2                   | Virus    | no  | no  | no  |
| australia | redspotted grouper nervous necrosis v | Virus    | no  | no  | no  |
| australia | fasciola gigantica                    | Helminth | yes | yes | no  |
| australia | murid herpesvirus 1                   | Virus    | no  | no  | no  |
| australia | toxoplasma gondii                     | Protozoa | yes | yes | yes |
| australia | haemophilus influenzae                | Bacteria | yes | no  | yes |
| australia | calicotyle australis                  | Helminth | no  | no  | no  |
| australia | bordetella hinzii                     | Bacteria | no  | no  | no  |
| australia | choanocotyle nematoides               | Helminth | no  | no  | no  |
| australia | chlamydomyces abortus                 | Bacteria | no  | no  | no  |
| australia | flavobacterium psychrophilum          | Bacteria | no  | no  | no  |
| australia | braya yantschi                        | Helminth | no  | no  | no  |
| australia | candida dubliniensis                  | Fungi    | yes | no  | no  |
| australia | penicillium citrinum                  | Fungi    | yes | no  | no  |
| australia | neisseria gonorrhoeae                 | Bacteria | yes | no  | yes |
| australia | ancylostoma caninum                   | Helminth | yes | yes | no  |
| australia | bacillus anthracis                    | Bacteria | yes | yes | yes |
| australia | phthinomita littlewoodi               | Helminth | no  | no  | no  |

|           |                                   |          |     |     |     |
|-----------|-----------------------------------|----------|-----|-----|-----|
| australia | capillaria gastrica               | Helminth | no  | no  | no  |
| australia | encephalitozoon intestinalis      | Fungi    | yes | no  | yes |
| australia | cryptosporidium hominis           | Protozoa | yes | no  | yes |
| australia | dollfusiella spinulifera          | Helminth | no  | no  | no  |
| australia | dollfusiella michiae              | Helminth | no  | no  | no  |
| australia | campylobacter jejuni              | Bacteria | yes | yes | yes |
| australia | cardicola tantabiddii             | Helminth | no  | no  | no  |
| australia | rabbit hemorrhagic disease virus  | Virus    | no  | no  | no  |
| australia | fonsecaea pedrosoi                | Fungi    | no  | no  | no  |
| australia | gotocotyla bivaginalis            | Helminth | no  | no  | no  |
| australia | haplorchis popelkae               | Helminth | no  | no  | no  |
| australia | clavispora lusitaniae             | Fungi    | no  | no  | no  |
| australia | myzoxenus insolens                | Helminth | no  | no  | no  |
| australia | burkholderia tropica              | Bacteria | no  | no  | no  |
| australia | botryosphaeria rhodina            | Fungi    | no  | no  | no  |
| australia | proemotobothrium linstowi         | Helminth | no  | no  | no  |
| australia | dollfusiella tenuispinis          | Helminth | no  | no  | no  |
| australia | brachyspira intermedia            | Bacteria | no  | no  | no  |
| australia | newcastle disease virus           | Virus    | yes | yes | no  |
| australia | measles virus                     | Virus    | yes | yes | yes |
| australia | aichi virus                       | Virus    | no  | no  | no  |
| australia | colletotrichum truncatum          | Fungi    | no  | no  | no  |
| australia | avibacterium endocarditidis       | Bacteria | no  | no  | no  |
| australia | human coronavirus 229e            | Virus    | yes | no  | no  |
| australia | taenia taeniaeformis              | Helminth | yes | yes | no  |
| australia | streptococcus pneumoniae          | Bacteria | yes | yes | yes |
| australia | mycobacterium tuberculosis        | Bacteria | yes | yes | yes |
| australia | prosogonotrema bilabiatum         | Helminth | no  | no  | no  |
| australia | branchotenthes octohamatus        | Helminth | no  | no  | no  |
| australia | pseudogilquinia microbothria      | Helminth | no  | no  | no  |
| australia | spirometra erinaceieuropaei       | Helminth | no  | no  | no  |
| australia | phthinomita adlardi               | Helminth | no  | no  | no  |
| australia | phthinomita ingramae              | Helminth | no  | no  | no  |
| australia | vibrio tasmaniensis               | Bacteria | no  | no  | no  |
| australia | trypanosoma corvi                 | Protozoa | no  | no  | no  |
| australia | feline leukemia virus             | Virus    | no  | no  | no  |
| australia | pseudoleptobothrium aptychotremae | Helminth | no  | no  | no  |
| australia | euryhaliotrematoides aspistis     | Helminth | no  | no  | no  |
| australia | phthinomita munozae               | Helminth | no  | no  | no  |
| australia | burkholderia pseudomallei         | Bacteria | yes | yes | no  |
| australia | bordetella pertussis              | Bacteria | yes | no  | yes |
| australia | anaplasma centrale                | Bacteria | no  | no  | no  |
| australia | haemoproteus lanii                | Protozoa | no  | no  | no  |
| australia | trichosporon asahii               | Fungi    | yes | yes | no  |
| australia | cardicola watsonensis             | Helminth | no  | no  | no  |
| australia | candida albicans                  | Fungi    | yes | yes | yes |
| australia | eimeria tenella                   | Protozoa | no  | no  | no  |
| australia | rickettsia felis                  | Bacteria | yes | yes | no  |
| australia | citrobacter freundii              | Bacteria | yes | yes | no  |
| australia | cryptococcus gattii               | Fungi    | no  | no  | no  |

|           |                                  |          |     |     |     |
|-----------|----------------------------------|----------|-----|-----|-----|
| australia | nelson bay orthoreovirus         | Virus    | no  | no  | no  |
| australia | toxascaris leonina               | Helminth | yes | yes | no  |
| australia | ostertagia ostertagi             | Helminth | yes | yes | no  |
| australia | neoparacardicola nasonis         | Helminth | no  | no  | no  |
| australia | human metapneumovirus            | Virus    | no  | no  | no  |
| australia | neoparamoeba pemaquidensis       | Protozoa | no  | no  | no  |
| australia | prodistomum keyam                | Helminth | no  | no  | no  |
| australia | brachyspira pilosicoli           | Bacteria | no  | no  | no  |
| australia | cladosporium cladosporioides     | Fungi    | yes | no  | no  |
| australia | eimeria maxima                   | Protozoa | no  | no  | no  |
| australia | otobothrium propecycticum        | Helminth | no  | no  | no  |
| australia | shuni virus                      | Virus    | no  | no  | no  |
| australia | anoplodiscus cirrusspiralis      | Helminth | no  | no  | no  |
| australia | hepatitis a virus                | Virus    | yes | yes | yes |
| australia | trigonocryptus conus             | Helminth | no  | no  | no  |
| australia | nasicola klawei                  | Helminth | no  | no  | no  |
| australia | vibrio harveyi                   | Bacteria | no  | no  | no  |
| australia | vibrio alginolyticus             | Bacteria | yes | yes | no  |
| australia | pseudogilquinia pillersi         | Helminth | no  | no  | no  |
| australia | australian bat lyssavirus        | Virus    | yes | yes | yes |
| australia | austramphilina elongata          | Helminth | no  | no  | no  |
| australia | opechona kahawai                 | Helminth | no  | no  | no  |
| australia | microporus xanthopus             | Fungi    | no  | no  | no  |
| australia | cryptosporidium felis            | Protozoa | no  | no  | no  |
| australia | plasmodium vivax                 | Protozoa | yes | no  | yes |
| australia | ochrobactrum anthropi            | Bacteria | yes | no  | no  |
| australia | murray valley encephalitis virus | Virus    | yes | yes | yes |
| australia | coxiella burnetii                | Bacteria | yes | yes | no  |
| australia | entobdella australis             | Helminth | no  | no  | no  |
| australia | bovine leukemia virus            | Virus    | no  | no  | no  |
| australia | legionella pneumophila           | Bacteria | yes | no  | yes |
| australia | giardia psittaci                 | Protozoa | no  | no  | no  |
| australia | ancylostoma ceylanicum           | Helminth | yes | yes | no  |
| australia | human enterovirus d              | Virus    | yes | no  | no  |
| australia | leptospira interrogans           | Bacteria | yes | yes | yes |
| australia | chelonid herpesvirus 5           | Virus    | no  | no  | no  |
| australia | multicalyx elegans               | Helminth | no  | no  | no  |
| australia | ross river virus                 | Virus    | yes | yes | yes |
| australia | vibrio rotiferianus              | Bacteria | no  | no  | no  |
| australia | anguillicoloides novaezelandiae  | Helminth | no  | no  | no  |
| australia | neoparamoeba branchiphila        | Protozoa | no  | no  | no  |
| australia | dollfusiella martini             | Helminth | no  | no  | no  |
| australia | gallid herpesvirus 2             | Virus    | no  | no  | no  |
| australia | canid herpesvirus 1              | Virus    | no  | no  | no  |
| australia | proenenterum isocotylum          | Helminth | no  | no  | no  |
| australia | concinocotyla australensis       | Helminth | no  | no  | no  |
| australia | macvicaria macassarensis         | Helminth | no  | no  | no  |
| australia | ophiotaenia gallardi             | Helminth | no  | no  | no  |
| australia | paragyliauchen arusettae         | Helminth | no  | no  | no  |
| australia | bohle iridovirus                 | Virus    | no  | no  | no  |

|           |                                        |          |     |     |     |
|-----------|----------------------------------------|----------|-----|-----|-----|
| australia | parachristianella baverstocki          | Helminth | no  | no  | no  |
| australia | human enterovirus b                    | Virus    | yes | no  | yes |
| australia | salinispora arenicola                  | Bacteria | no  | no  | no  |
| australia | torque teno sus virus 2                | Virus    | no  | no  | no  |
| australia | rabies virus                           | Virus    | yes | yes | yes |
| australia | bovine herpesvirus 5                   | Virus    | no  | no  | no  |
| australia | neoapocreadium splendens               | Helminth | no  | no  | no  |
| australia | trichophyton rubrum                    | Fungi    | yes | yes | no  |
| australia | phthinomita brooksi                    | Helminth | no  | no  | no  |
| australia | staphylococcus hominis                 | Bacteria | no  | no  | no  |
| australia | dendromonocotyle bradsmithi            | Helminth | no  | no  | no  |
| australia | schizophyllum commune                  | Fungi    | yes | no  | no  |
| australia | porcine reproductive and respiratory s | Virus    | no  | no  | no  |
| australia | gyrodactylus macracanthus              | Helminth | no  | no  | no  |
| australia | trypanosoma copemani                   | Protozoa | no  | no  | no  |
| australia | pterobothrium lintoni                  | Helminth | no  | no  | no  |
| australia | human immunodeficiency virus 1         | Virus    | yes | no  | yes |
| australia | phthinomita symplocos                  | Helminth | no  | no  | no  |
| australia | human coronavirus hku1                 | Virus    | no  | no  | no  |
| australia | plethorchis acanthus                   | Helminth | no  | no  | no  |
| australia | babesia gibsoni                        | Protozoa | yes | yes | no  |
| australia | eimeria praecox                        | Protozoa | no  | no  | no  |
| australia | mecistobothrium johnstonei             | Helminth | no  | no  | no  |
| australia | aquareovirus a                         | Virus    | no  | no  | no  |
| australia | cochliobolus cynodontis                | Fungi    | no  | no  | no  |
| australia | cryptosporidium molnari                | Protozoa | no  | no  | no  |
| australia | chlamydophila pneumoniae               | Bacteria | yes | yes | no  |
| australia | brachyspira hyodysenteriae             | Bacteria | no  | no  | no  |
| australia | klebsiella pneumoniae                  | Bacteria | yes | yes | yes |
| australia | gorgoderina attenuata                  | Helminth | no  | no  | no  |
| australia | enterocytozoon bieneusi                | Fungi    | yes | no  | yes |
| australia | naegleria clarki                       | Protozoa | no  | no  | no  |
| australia | cryptosporidium baileyi                | Protozoa | no  | no  | no  |
| australia | mycobacterium avium                    | Bacteria | yes | yes | yes |
| australia | staphylococcus aureus                  | Bacteria | yes | yes | yes |
| australia | fusarium oxysporum                     | Fungi    | yes | no  | yes |
| australia | megalobenedenia helicoleni             | Helminth | no  | no  | no  |
| australia | trichostrongylus colubriformis         | Helminth | yes | yes | no  |
| australia | anoplocephala perfoliata               | Helminth | no  | no  | no  |
| australia | oncomegas australiensis                | Helminth | no  | no  | no  |
| australia | transversotrema haasi                  | Helminth | no  | no  | no  |
| australia | clostridium difficile                  | Bacteria | yes | yes | yes |
| australia | brucella suis                          | Bacteria | yes | yes | no  |
| australia | petalocotyle adenometra                | Helminth | no  | no  | no  |
| australia | echinobothrium chisholmae              | Helminth | no  | no  | no  |
| australia | histophilus somni                      | Bacteria | no  | no  | no  |
| australia | sindbis virus                          | Virus    | yes | yes | yes |
| australia | avibacterium gallinarum                | Bacteria | no  | no  | no  |
| australia | avibacterium paragallinarum            | Bacteria | no  | no  | no  |
| australia | rhizomucor pusillus                    | Fungi    | yes | yes | no  |

|           |                                        |          |     |     |     |
|-----------|----------------------------------------|----------|-----|-----|-----|
| australia | <i>micrococcus luteus</i>              | Bacteria | no  | no  | no  |
| australia | <i>ajellomyces capsulatus</i>          | Fungi    | no  | no  | no  |
| australia | <i>giardia intestinalis</i>            | Protozoa | no  | no  | no  |
| australia | <i>trichophyton schoenleinii</i>       | Fungi    | yes | yes | no  |
| australia | <i>balanotaenia bancrofti</i>          | Helminth | no  | no  | no  |
| australia | <i>braya jexi</i>                      | Helminth | no  | no  | no  |
| australia | <i>anatrichosoma haycocki</i>          | Helminth | no  | no  | no  |
| australia | <i>orientia tsutsugamushi</i>          | Bacteria | yes | yes | no  |
| australia | <i>cardicola lafii</i>                 | Helminth | no  | no  | no  |
| australia | <i>raillietina australis</i>           | Helminth | no  | no  | no  |
| australia | <i>cryptococcus laurentii</i>          | Fungi    | no  | no  | no  |
| australia | <i>cochliobolus australiensis</i>      | Fungi    | no  | no  | no  |
| australia | <i>koseiria xishaense</i>              | Helminth | no  | no  | no  |
| australia | human astrovirus                       | Virus    | yes | no  | yes |
| australia | <i>pseudomonas aeruginosa</i>          | Bacteria | yes | yes | yes |
| australia | <i>strongyloides stercoralis</i>       | Helminth | yes | yes | yes |
| australia | <i>cryptosporidium muris</i>           | Protozoa | no  | no  | no  |
| australia | <i>aureobasidium pullulans</i>         | Fungi    | yes | no  | no  |
| australia | <i>neohypocreadium dorsoporum</i>      | Helminth | no  | no  | no  |
| australia | equine rhinitis a virus                | Virus    | no  | no  | no  |
| australia | <i>opistholebes amplicoelus</i>        | Helminth | no  | no  | no  |
| australia | <i>molicola thyristes</i>              | Helminth | no  | no  | no  |
| australia | <i>toxocara canis</i>                  | Helminth | yes | yes | no  |
| australia | <i>papillostrongylus labiatus</i>      | Helminth | no  | no  | no  |
| australia | <i>cryptococcus neoformans</i>         | Fungi    | yes | yes | yes |
| australia | <i>preptetos caballeroi</i>            | Helminth | no  | no  | no  |
| australia | <i>oesophagostomum venulosum</i>       | Helminth | no  | no  | no  |
| australia | <i>halysiorhynchus macrocephalus</i>   | Helminth | no  | no  | no  |
| australia | norwalk virus                          | Virus    | yes | no  | yes |
| australia | <i>neoscytalidium dimidiatum</i>       | Fungi    | no  | no  | no  |
| australia | <i>streptococcus equi</i>              | Bacteria | yes | yes | no  |
| australia | <i>neopolystoma chelodinae</i>         | Helminth | no  | no  | no  |
| australia | <i>burkholderia cenocepacia</i>        | Bacteria | no  | no  | no  |
| australia | <i>labiostrongylus longispicularis</i> | Helminth | no  | no  | no  |
| australia | murine coronavirus                     | Virus    | no  | no  | no  |
| australia | <i>penicillium marneffeii</i>          | Fungi    | yes | yes | yes |
| australia | <i>scedosporium aurantiacum</i>        | Fungi    | no  | no  | no  |
| australia | <i>necator americanus</i>              | Helminth | yes | yes | no  |
| australia | <i>symmetrovvesicula gracilis</i>      | Helminth | no  | no  | no  |
| australia | <i>candida metapsilosis</i>            | Fungi    | no  | no  | no  |
| australia | <i>chalastospora gossypii</i>          | Fungi    | no  | no  | no  |
| australia | <i>lacistorhynchus dollfusi</i>        | Helminth | no  | no  | no  |
| australia | <i>eimeria brunetti</i>                | Protozoa | no  | no  | no  |
| australia | <i>aeromonas salmonicida</i>           | Bacteria | no  | no  | no  |
| australia | hepatitis c virus                      | Virus    | yes | no  | yes |
| australia | <i>choanocotyle hobbsi</i>             | Helminth | no  | no  | no  |
| australia | <i>fossobothrium perplexum</i>         | Helminth | no  | no  | no  |
| australia | <i>trichophyton tonsurans</i>          | Fungi    | yes | yes | no  |
| australia | <i>taenia serialis</i>                 | Helminth | yes | no  | no  |
| australia | <i>alternaria alternata</i>            | Fungi    | yes | yes | no  |



|           |                                |          |     |     |     |
|-----------|--------------------------------|----------|-----|-----|-----|
| australia | chikungunya virus              | Virus    | yes | yes | yes |
| australia | cardicola covacinae            | Helminth | no  | no  | no  |
| australia | papillostrongylus barbatus     | Helminth | no  | no  | no  |
| australia | plasmodium gonderi             | Protozoa | no  | no  | no  |
| australia | leptospira borgpetersenii      | Bacteria | yes | yes | no  |
| australia | mycoplasma synoviae            | Bacteria | no  | no  | no  |
| australia | deretrema nahaense             | Helminth | no  | no  | no  |
| australia | dermatophilus congolensis      | Bacteria | yes | yes | no  |
| australia | aeromonas veronii              | Bacteria | yes | no  | yes |
| australia | macrobothridium rhynchobati    | Helminth | no  | no  | no  |
| australia | aeromonas caviae               | Bacteria | yes | yes | yes |
| australia | indosolenorchis hirudinaceus   | Helminth | no  | no  | no  |
| australia | fasciola hepatica              | Helminth | yes | yes | no  |
| australia | camallanus waelhreow           | Helminth | no  | no  | no  |
| australia | benedenia anticavaginata       | Helminth | no  | no  | no  |
| australia | arthrographis kalrae           | Fungi    | no  | no  | no  |
| australia | choricotyle australiensis      | Helminth | no  | no  | no  |
| australia | trachipleistophora hominis     | Fungi    | yes | no  | yes |
| australia | mitotrema anthostomatum        | Helminth | no  | no  | no  |
| australia | arthroderma benhamiae          | Fungi    | no  | no  | no  |
| australia | equid herpesvirus 2            | Virus    | no  | no  | no  |
| australia | bluetongue virus               | Virus    | no  | no  | no  |
| australia | penicillium brevicompactum     | Fungi    | no  | no  | no  |
| australia | acremonium kiliense            | Fungi    | yes | yes | no  |
| australia | saksenaea erythrospora         | Fungi    | no  | no  | no  |
| australia | plasmodium falciparum          | Protozoa | yes | no  | yes |
| australia | yersinia aleksiciae            | Bacteria | no  | no  | no  |
| australia | hemiperina manteri             | Helminth | no  | no  | no  |
| australia | cardicola coeptus              | Helminth | no  | no  | no  |
| australia | neoentobdella natans           | Helminth | no  | no  | no  |
| australia | cardicola bartolii             | Helminth | no  | no  | no  |
| australia | rotavirus c                    | Virus    | yes | yes | yes |
| australia | skrjabinia cesticillus         | Helminth | no  | no  | no  |
| australia | helicobacter pylori            | Bacteria | yes | yes | no  |
| australia | chicken astrovirus             | Virus    | no  | no  | no  |
| australia | capsaloides magnaspinosus      | Helminth | no  | no  | no  |
| australia | trichophyton terrestre         | Fungi    | no  | no  | no  |
| australia | human immunodeficiency virus 2 | Virus    | yes | no  | yes |
| australia | cardicola milleri              | Helminth | no  | no  | no  |
| australia | campylobacter fetus            | Bacteria | yes | yes | yes |
| australia | taprobanella bicaudata         | Helminth | no  | no  | no  |
| australia | veronaea botryosa              | Fungi    | yes | no  | no  |
| australia | hexostoma thynni               | Helminth | no  | no  | no  |
| australia | equid herpesvirus 4            | Virus    | no  | no  | no  |
| australia | barmah forest virus            | Virus    | yes | yes | yes |
| australia | chlamydia trachomatis          | Bacteria | yes | yes | yes |
| australia | gorgocephalus kyphosi          | Helminth | no  | no  | no  |
| australia | streptococcus dysgalactiae     | Bacteria | no  | no  | no  |
| australia | floriceps minacanthus          | Helminth | no  | no  | no  |
| australia | bunostomum trigonocephalum     | Helminth | no  | no  | no  |

|           |                                |          |     |     |     |
|-----------|--------------------------------|----------|-----|-----|-----|
| australia | krefftascaaris parmenteri      | Helminth | no  | no  | no  |
| australia | cladosporium bruhnei           | Fungi    | no  | no  | no  |
| australia | streptococcus pyogenes         | Bacteria | yes | yes | yes |
| australia | haemoproteus payevskiyi        | Protozoa | no  | no  | no  |
| australia | neopolystoma spratti           | Helminth | no  | no  | no  |
| australia | phthinomita jonesi             | Helminth | no  | no  | no  |
| australia | opisthadenia dimidia           | Helminth | no  | no  | no  |
| australia | dientamoeba fragilis           | Protozoa | yes | yes | no  |
| australia | raillietina chiltoni           | Helminth | no  | no  | no  |
| australia | bovine immunodeficiency virus  | Virus    | no  | no  | no  |
| australia | botryosphaeria dothidea        | Fungi    | no  | no  | no  |
| australia | berrimah virus                 | Virus    | no  | no  | no  |
| australia | neoparamoeba perurans          | Protozoa | no  | no  | no  |
| australia | adelaide river virus           | Virus    | no  | no  | no  |
| australia | chabertia ovina                | Helminth | no  | no  | no  |
| australia | gyrodactylus anguillae         | Helminth | no  | no  | no  |
| australia | human herpesvirus 4            | Virus    | no  | no  | no  |
| australia | preptetos laguncula            | Helminth | no  | no  | no  |
| australia | taenia ovis                    | Helminth | no  | no  | no  |
| australia | human parainfluenza virus 4    | Virus    | yes | no  | no  |
| australia | equid herpesvirus 1            | Virus    | no  | no  | no  |
| australia | hepatitis b virus              | Virus    | yes | no  | yes |
| australia | clostridium perfringens        | Bacteria | yes | yes | no  |
| australia | neotentobdella australis       | Helminth | no  | no  | no  |
| australia | bartonella henselae            | Bacteria | yes | yes | no  |
| australia | dictyocaulus filaria           | Helminth | no  | no  | no  |
| australia | capsala pricei                 | Helminth | no  | no  | no  |
| australia | campylobacter concisus         | Bacteria | yes | no  | no  |
| australia | hepatitis e virus              | Virus    | yes | yes | yes |
| australia | neohexangitrema zebrasomatis   | Helminth | no  | no  | no  |
| australia | hendra virus                   | Virus    | no  | no  | no  |
| australia | theileria orientalis           | Protozoa | no  | no  | no  |
| australia | aliivibrio fischeri            | Bacteria | no  | no  | no  |
| australia | human coronavirus nl63         | Virus    | no  | no  | no  |
| australia | camallanus nithoggi            | Helminth | no  | no  | no  |
| australia | dengue virus                   | Virus    | no  | no  | no  |
| australia | japanese encephalitis virus    | Virus    | yes | yes | yes |
| australia | phialophora verrucosa          | Fungi    | yes | yes | no  |
| australia | naegleria fultoni              | Protozoa | no  | no  | no  |
| australia | gallid herpesvirus 1           | Virus    | no  | no  | no  |
| australia | hapladena nasonis              | Helminth | no  | no  | no  |
| australia | gotocotyla bivagina            | Helminth | no  | no  | no  |
| australia | symmetrovvesicula chaetodontis | Helminth | no  | no  | no  |
| australia | echinococcus granulosus        | Helminth | yes | yes | yes |
| australia | anaplasma marginale            | Bacteria | no  | no  | no  |
| australia | streptococcus uberis           | Bacteria | yes | yes | no  |
| australia | haemonchus placei              | Helminth | no  | no  | no  |
| australia | human rhinovirus c             | Virus    | no  | no  | no  |
| australia | campylobacter coli             | Bacteria | yes | yes | no  |
| australia | cardicola chaetodontis         | Helminth | no  | no  | no  |

|           |                                      |          |     |     |     |
|-----------|--------------------------------------|----------|-----|-----|-----|
| australia | ralstonia pickettii                  | Bacteria | yes | no  | no  |
| australia | aeromonas hydrophila                 | Bacteria | yes | yes | yes |
| australia | toxocara cati                        | Helminth | yes | yes | no  |
| australia | saccharomyces cerevisiae             | Fungi    | yes | no  | no  |
| australia | parapolystoma bulliense              | Helminth | no  | no  | no  |
| australia | escherichia coli                     | Bacteria | yes | yes | yes |
| australia | otobothrium carcharidis              | Helminth | no  | no  | no  |
| australia | oesophagostomum columbianum          | Helminth | no  | no  | no  |
| australia | hypodontus macropi                   | Helminth | no  | no  | no  |
| australia | capsala laevis                       | Helminth | no  | no  | no  |
| australia | uncinaria stenocephala               | Helminth | yes | yes | no  |
| australia | atractotrema sigani                  | Helminth | no  | no  | no  |
| australia | haemonchus contortus                 | Helminth | yes | yes | no  |
| australia | aeromonas bestiarum                  | Bacteria | no  | no  | no  |
| australia | paecilomyces lilacinus               | Fungi    | yes | yes | no  |
| australia | klebsiella oxytoca                   | Bacteria | yes | yes | no  |
| australia | callitetrarhynchus speciosus         | Helminth | no  | no  | no  |
| australia | rugogaster hydrolagi                 | Helminth | no  | no  | no  |
| australia | myxoma virus                         | Virus    | no  | no  | no  |
| australia | setosphaeria rostrata                | Fungi    | yes | no  | no  |
| australia | bacillus licheniformis               | Bacteria | yes | yes | no  |
| australia | mycoplasma genitalium                | Bacteria | yes | no  | no  |
| australia | taenia solium                        | Helminth | yes | no  | yes |
| australia | trichophyton equinum                 | Fungi    | yes | yes | no  |
| australia | wickerhamomyces anomalus             | Fungi    | no  | no  | no  |
| australia | human enterovirus c                  | Virus    | yes | no  | no  |
| australia | epicoccum nigrum                     | Fungi    | no  | no  | no  |
| australia | bovine ephemeral fever virus         | Virus    | yes | yes | no  |
| australia | opisthotrema dujonis                 | Helminth | no  | no  | no  |
| australia | raillietina mitchelli                | Helminth | no  | no  | no  |
| australia | trichomonas vaginalis                | Protozoa | yes | no  | yes |
| australia | raillietina beveridgei               | Helminth | no  | no  | no  |
| australia | influenza b virus                    | Virus    | yes | yes | no  |
| austria   | pentatrichomonas hominis             | Protozoa | yes | yes | no  |
| austria   | borna disease virus                  | Virus    | yes | yes | no  |
| austria   | serratia marcescens                  | Bacteria | yes | yes | yes |
| austria   | fowl adenovirus d                    | Virus    | no  | no  | no  |
| austria   | pseudomonas brenneri                 | Bacteria | no  | no  | no  |
| austria   | human herpesvirus 5                  | Virus    | yes | no  | yes |
| austria   | eubothrium salvelini                 | Helminth | no  | no  | no  |
| austria   | canine distemper virus               | Virus    | no  | no  | no  |
| austria   | newcastle disease virus              | Virus    | yes | yes | no  |
| austria   | citrobacter freundii                 | Bacteria | yes | yes | no  |
| austria   | plectosphaerella cucumerina          | Fungi    | no  | no  | no  |
| austria   | babesia microti                      | Protozoa | yes | yes | yes |
| austria   | feline immunodeficiency virus        | Virus    | no  | no  | no  |
| austria   | triaenophorus crassus                | Helminth | no  | no  | no  |
| austria   | epicoccum nigrum                     | Fungi    | no  | no  | no  |
| austria   | infectious pancreatic necrosis virus | Virus    | no  | no  | no  |
| austria   | engyodontium album                   | Fungi    | yes | no  | no  |

|         |                                         |          |     |     |     |
|---------|-----------------------------------------|----------|-----|-----|-----|
| austria | acremonium strictum                     | Fungi    | yes | no  | no  |
| austria | legionella pneumophila                  | Bacteria | yes | no  | yes |
| austria | anguillicoloides papernai               | Helminth | no  | no  | no  |
| austria | bartonella washoensis                   | Bacteria | no  | no  | no  |
| austria | sapporo virus                           | Virus    | no  | no  | no  |
| austria | bacillus pumilus                        | Bacteria | yes | no  | no  |
| austria | cladosporium sphaerospermum             | Fungi    | no  | no  | no  |
| austria | bifidobacterium animalis                | Bacteria | no  | no  | no  |
| austria | bovine viral diarrhea virus 1           | Virus    | no  | no  | no  |
| austria | ureaplasma parvum                       | Bacteria | no  | no  | no  |
| austria | pantoea agglomerans                     | Bacteria | yes | yes | no  |
| austria | janthinobacterium lividum               | Bacteria | no  | no  | no  |
| austria | border disease virus                    | Virus    | no  | no  | no  |
| austria | bovine viral diarrhea virus 2           | Virus    | no  | no  | no  |
| austria | raoultella ornithinolytica              | Bacteria | no  | no  | no  |
| austria | propionibacterium acnes                 | Bacteria | yes | yes | no  |
| austria | brucella microti                        | Bacteria | no  | no  | no  |
| austria | fusarium solani                         | Fungi    | yes | yes | yes |
| austria | alternaria alternata                    | Fungi    | yes | yes | no  |
| austria | moraxella osloensis                     | Bacteria | yes | no  | no  |
| austria | human adenovirus b                      | Virus    | yes | no  | no  |
| austria | canarypox virus                         | Virus    | no  | no  | no  |
| austria | babesia major                           | Protozoa | no  | no  | no  |
| austria | bacillus cereus                         | Bacteria | yes | yes | no  |
| austria | trichosporon mucoides                   | Fungi    | yes | yes | no  |
| austria | staphylococcus epidermidis              | Bacteria | yes | yes | yes |
| austria | bacillus amyloliquefaciens              | Bacteria | no  | no  | no  |
| austria | klebsiella pneumoniae                   | Bacteria | yes | yes | yes |
| austria | norwalk virus                           | Virus    | yes | no  | yes |
| austria | human enterovirus b                     | Virus    | yes | no  | yes |
| austria | chelonobacter oris                      | Bacteria | no  | no  | no  |
| austria | infectious hematopoietic necrosis virus | Virus    | no  | no  | no  |
| austria | measles virus                           | Virus    | yes | yes | yes |
| austria | ochrobactrum anthropi                   | Bacteria | yes | no  | no  |
| austria | influenza a virus                       | Virus    | yes | yes | yes |
| austria | bovine papillomavirus 1                 | Virus    | no  | no  | no  |
| austria | usutu virus                             | Virus    | yes | yes | no  |
| austria | aspergillus sydowii                     | Fungi    | no  | no  | no  |
| austria | cordyceps bassiana                      | Fungi    | no  | no  | no  |
| austria | meyerozyma guilliermondii               | Fungi    | no  | no  | no  |
| austria | fowl adenovirus a                       | Virus    | no  | no  | no  |
| austria | viral hemorrhagic septicemia virus      | Virus    | no  | no  | no  |
| austria | ascaris lumbricoides                    | Helminth | yes | yes | no  |
| austria | eimeria phalacrocoraxae                 | Protozoa | no  | no  | no  |
| austria | eubacterium infirmum                    | Bacteria | no  | no  | no  |
| austria | triaenophorus nodulosus                 | Helminth | no  | no  | no  |
| austria | rhodococcus rhodochrous                 | Bacteria | yes | no  | no  |
| austria | bacillus circulans                      | Bacteria | yes | no  | no  |
| austria | chlamydomyces pecorum                   | Bacteria | no  | no  | no  |
| austria | cladosporium cladosporioides            | Fungi    | yes | no  | no  |

|         |                                |          |     |     |     |
|---------|--------------------------------|----------|-----|-----|-----|
| austria | kytocooccus sedentarius        | Bacteria | no  | no  | no  |
| austria | staphylococcus aureus          | Bacteria | yes | yes | yes |
| austria | babesia capreoli               | Protozoa | no  | no  | no  |
| austria | fusarium oxysporum             | Fungi    | yes | no  | yes |
| austria | fasciola hepatica              | Helminth | yes | yes | no  |
| austria | proteus mirabilis              | Bacteria | yes | yes | no  |
| austria | polystomoides oris             | Helminth | no  | no  | no  |
| austria | leishmania guyanensis          | Protozoa | yes | yes | no  |
| austria | trichoderma atroviride         | Fungi    | no  | no  | no  |
| austria | anaplasma phagocytophilum      | Bacteria | no  | no  | no  |
| austria | equine arteritis virus         | Virus    | no  | no  | no  |
| austria | fowl adenovirus b              | Virus    | no  | no  | no  |
| austria | micrococcus luteus             | Bacteria | no  | no  | no  |
| austria | bifidobacterium thermophilum   | Bacteria | no  | no  | no  |
| austria | babesia divergens              | Protozoa | yes | yes | no  |
| austria | influenza b virus              | Virus    | yes | yes | no  |
| austria | eurotium amstelodami           | Fungi    | no  | no  | no  |
| austria | debaryomyces subglobosus       | Fungi    | no  | no  | no  |
| austria | echinococcus multilocularis    | Helminth | yes | yes | no  |
| austria | hepatitis c virus              | Virus    | yes | no  | yes |
| austria | schizophyllum commune          | Fungi    | yes | no  | no  |
| austria | fowlpox virus                  | Virus    | no  | no  | no  |
| austria | encephalitozoon cuniculi       | Fungi    | yes | yes | yes |
| austria | citrobacter gillenii           | Bacteria | no  | no  | no  |
| austria | agrococcus baldri              | Bacteria | no  | no  | no  |
| austria | raoultella planticola          | Bacteria | no  | no  | no  |
| austria | carnobacterium maltaromaticum  | Bacteria | no  | no  | no  |
| austria | procamallanus fulvidraconis    | Helminth | no  | no  | no  |
| austria | human enterovirus a            | Virus    | yes | no  | no  |
| austria | aureobasidium pullulans        | Fungi    | yes | no  | no  |
| austria | lewia infectoria               | Fungi    | no  | no  | no  |
| austria | borrelia burgdorferi           | Bacteria | yes | yes | yes |
| austria | pseudomonas putida             | Bacteria | yes | no  | no  |
| austria | pseudomonas fluorescens        | Bacteria | yes | no  | no  |
| austria | streptococcus pyogenes         | Bacteria | yes | yes | yes |
| austria | enterobacter cloacae           | Bacteria | yes | yes | no  |
| austria | trichomonas gallinae           | Protozoa | no  | no  | no  |
| austria | puumala virus                  | Virus    | yes | yes | yes |
| austria | salmonella enterica            | Bacteria | no  | no  | no  |
| austria | avibacterium gallinarum        | Bacteria | no  | no  | no  |
| austria | echinococcus granulosus        | Helminth | yes | yes | yes |
| austria | morganella morganii            | Bacteria | yes | yes | no  |
| austria | streptococcus pneumoniae       | Bacteria | yes | yes | yes |
| austria | pseudomonas aeruginosa         | Bacteria | yes | yes | yes |
| austria | escherichia coli               | Bacteria | yes | yes | yes |
| austria | klebsiella oxytoca             | Bacteria | yes | yes | no  |
| austria | human immunodeficiency virus 2 | Virus    | yes | no  | yes |
| austria | babesia bigemina               | Protozoa | no  | no  | no  |
| austria | hepatitis e virus              | Virus    | yes | yes | yes |
| austria | cowpox virus                   | Virus    | yes | yes | no  |

|            |                                        |          |     |     |     |
|------------|----------------------------------------|----------|-----|-----|-----|
| austria    | fowl adenovirus c                      | Virus    | no  | no  | no  |
| austria    | pyronema domesticum                    | Fungi    | no  | no  | no  |
| austria    | geobacillus stearothermophilus         | Bacteria | no  | no  | no  |
| austria    | acinetobacter junii                    | Bacteria | yes | no  | no  |
| austria    | human immunodeficiency virus 1         | Virus    | yes | no  | yes |
| austria    | fascioloides magna                     | Helminth | no  | no  | no  |
| austria    | chlamydia trachomatis                  | Bacteria | yes | yes | yes |
| austria    | rhodococcus equi                       | Bacteria | yes | yes | no  |
| austria    | pseudomonas fragi                      | Bacteria | no  | no  | no  |
| austria    | spring viraemia of carp virus          | Virus    | no  | no  | no  |
| austria    | porcine reproductive and respiratory s | Virus    | no  | no  | no  |
| austria    | foot-and-mouth disease virus           | Virus    | no  | no  | no  |
| austria    | helicobacter pullorum                  | Bacteria | yes | yes | no  |
| austria    | bacillus subtilis                      | Bacteria | yes | yes | no  |
| austria    | pseudodactylogyrus bini                | Helminth | no  | no  | no  |
| austria    | volucribacter psittacida               | Bacteria | no  | no  | no  |
| austria    | pasteurella testudinis                 | Bacteria | no  | no  | no  |
| azerbaijan | measles virus                          | Virus    | yes | yes | yes |
| azerbaijan | human adenovirus c                     | Virus    | yes | no  | no  |
| azerbaijan | influenza a virus                      | Virus    | yes | yes | yes |
| azerbaijan | avian coronavirus                      | Virus    | no  | no  | no  |
| azerbaijan | sindbis virus                          | Virus    | yes | yes | yes |
| azerbaijan | west Nile virus                        | Virus    | yes | yes | yes |
| azerbaijan | human enterovirus b                    | Virus    | yes | no  | yes |
| azerbaijan | human immunodeficiency virus 1         | Virus    | yes | no  | yes |
| azerbaijan | plasmodium vivax                       | Protozoa | yes | no  | yes |
| bahamas    | bacillus cereus                        | Bacteria | yes | yes | no  |
| bahamas    | fusarium incarnatum                    | Fungi    | yes | no  | no  |
| bahamas    | vibrio harveyi                         | Bacteria | no  | no  | no  |
| bahamas    | vibrio aestuarianus                    | Bacteria | no  | no  | no  |
| bahamas    | bacillus megaterium                    | Bacteria | no  | no  | no  |
| bahamas    | schizophyllum commune                  | Fungi    | yes | no  | no  |
| bahamas    | microbacterium testaceum               | Bacteria | no  | no  | no  |
| bahamas    | stenotrophomonas maltophilia           | Bacteria | no  | no  | no  |
| bahamas    | staphylococcus pasteurii               | Bacteria | no  | no  | no  |
| bahamas    | salinispora arenicola                  | Bacteria | no  | no  | no  |
| bahamas    | pseudomonas alcaligenes                | Bacteria | yes | no  | no  |
| bahamas    | agrobacterium tumefaciens              | Bacteria | no  | no  | no  |
| bahamas    | bacillus pumilus                       | Bacteria | yes | no  | no  |
| bahamas    | pseudomonas pseudoalcaligenes          | Bacteria | yes | no  | no  |
| bahamas    | human immunodeficiency virus 1         | Virus    | yes | no  | yes |
| bahamas    | dengue virus                           | Virus    | no  | no  | no  |
| bahamas    | vibrio parahaemolyticus                | Bacteria | yes | yes | yes |
| bahamas    | micrococcus luteus                     | Bacteria | no  | no  | no  |
| bahamas    | vibrio fortis                          | Bacteria | no  | no  | no  |
| bahamas    | staphylococcus haemolyticus            | Bacteria | yes | yes | no  |
| bahrain    | foot-and-mouth disease virus           | Virus    | no  | no  | no  |
| bahrain    | theileria annulata                     | Protozoa | no  | no  | no  |
| bahrain    | epizootic hemorrhagic disease virus    | Virus    | no  | no  | no  |
| bahrain    | rabbit hemorrhagic disease virus       | Virus    | no  | no  | no  |

|            |                                 |          |     |     |     |
|------------|---------------------------------|----------|-----|-----|-----|
| bahrain    | mycobacterium riyadhense        | Bacteria | no  | no  | no  |
| bangladesh | variola virus                   | Virus    | no  | no  | no  |
| bangladesh | shigella flexneri               | Bacteria | yes | yes | no  |
| bangladesh | cronobacter sakazakii           | Bacteria | no  | no  | no  |
| bangladesh | rotavirus c                     | Virus    | yes | yes | yes |
| bangladesh | sapporo virus                   | Virus    | no  | no  | no  |
| bangladesh | burkholderia pseudomallei       | Bacteria | yes | yes | no  |
| bangladesh | chikungunya virus               | Virus    | yes | yes | yes |
| bangladesh | aeromonas jandaei               | Bacteria | no  | no  | no  |
| bangladesh | neisseria gonorrhoeae           | Bacteria | yes | no  | yes |
| bangladesh | entamoeba histolytica           | Protozoa | yes | yes | no  |
| bangladesh | goatpox virus                   | Virus    | no  | no  | no  |
| bangladesh | human enterovirus b             | Virus    | yes | no  | yes |
| bangladesh | grimontia hollisae              | Bacteria | no  | no  | no  |
| bangladesh | comamonas testosteroni          | Bacteria | yes | no  | no  |
| bangladesh | rabies virus                    | Virus    | yes | yes | yes |
| bangladesh | streptococcus pneumoniae        | Bacteria | yes | yes | yes |
| bangladesh | nipah virus                     | Virus    | yes | yes | yes |
| bangladesh | plasmodium falciparum           | Protozoa | yes | no  | yes |
| bangladesh | mycobacterium tuberculosis      | Bacteria | yes | yes | yes |
| bangladesh | microbacterium oxydans          | Bacteria | no  | no  | no  |
| bangladesh | citrobacter freundii            | Bacteria | yes | yes | no  |
| bangladesh | human astrovirus                | Virus    | yes | no  | yes |
| bangladesh | human immunodeficiency virus 2  | Virus    | yes | no  | yes |
| bangladesh | staphylococcus haemolyticus     | Bacteria | yes | yes | no  |
| bangladesh | influenza a virus               | Virus    | yes | yes | yes |
| bangladesh | treponema pallidum              | Bacteria | yes | no  | yes |
| bangladesh | schistosoma indicum             | Helminth | no  | no  | no  |
| bangladesh | trichomonas vaginalis           | Protozoa | yes | no  | yes |
| bangladesh | schistosoma incognitum          | Helminth | no  | no  | no  |
| bangladesh | pseudocowpox virus              | Virus    | yes | yes | no  |
| bangladesh | hepatitis e virus               | Virus    | yes | yes | yes |
| bangladesh | shigella dysenteriae            | Bacteria | yes | yes | yes |
| bangladesh | vibrio parahaemolyticus         | Bacteria | yes | yes | yes |
| bangladesh | trichuris trichiura             | Helminth | yes | yes | no  |
| bangladesh | vibrio cholerae                 | Bacteria | yes | no  | yes |
| bangladesh | aeromonas veronii               | Bacteria | yes | no  | yes |
| bangladesh | ascaris lumbricoides            | Helminth | yes | yes | no  |
| bangladesh | salmonella enterica             | Bacteria | no  | no  | no  |
| bangladesh | norwalk virus                   | Virus    | yes | no  | yes |
| bangladesh | dengue virus                    | Virus    | no  | no  | no  |
| bangladesh | staphylococcus aureus           | Bacteria | yes | yes | yes |
| bangladesh | rotavirus a                     | Virus    | yes | yes | yes |
| bangladesh | vibrio mimicus                  | Bacteria | yes | yes | no  |
| bangladesh | plasmodium vivax                | Protozoa | yes | no  | yes |
| bangladesh | duck adenovirus a               | Virus    | no  | no  | no  |
| bangladesh | rotavirus b                     | Virus    | yes | yes | yes |
| bangladesh | human adenovirus f              | Virus    | yes | no  | no  |
| bangladesh | giardia intestinalis            | Protozoa | no  | no  | no  |
| bangladesh | infectious bursal disease virus | Virus    | no  | no  | no  |

|            |                                        |          |     |     |     |
|------------|----------------------------------------|----------|-----|-----|-----|
| bangladesh | human immunodeficiency virus 1         | Virus    | yes | no  | yes |
| bangladesh | aeromonas hydrophila                   | Bacteria | yes | yes | yes |
| bangladesh | bovine papular stomatitis virus        | Virus    | yes | yes | no  |
| bangladesh | vibrio campbellii                      | Bacteria | no  | no  | no  |
| bangladesh | escherichia albertii                   | Bacteria | no  | no  | no  |
| bangladesh | peste-des-petits-ruminants virus       | Virus    | no  | no  | no  |
| bangladesh | staphylococcus sciuri                  | Bacteria | no  | no  | no  |
| bangladesh | haemophilus influenzae                 | Bacteria | yes | no  | yes |
| bangladesh | newcastle disease virus                | Virus    | yes | yes | no  |
| bangladesh | providencia rettgeri                   | Bacteria | yes | yes | no  |
| bangladesh | leishmania donovani                    | Protozoa | yes | yes | yes |
| bangladesh | chlamydia trachomatis                  | Bacteria | yes | yes | yes |
| bangladesh | klebsiella pneumoniae                  | Bacteria | yes | yes | yes |
| bangladesh | gibberella moniliformis                | Fungi    | no  | no  | no  |
| bangladesh | escherichia coli                       | Bacteria | yes | yes | yes |
| bangladesh | hepatitis b virus                      | Virus    | yes | no  | yes |
| bangladesh | hepatitis c virus                      | Virus    | yes | no  | yes |
| bangladesh | helicobacter pylori                    | Bacteria | yes | yes | no  |
| bangladesh | human enterovirus c                    | Virus    | yes | no  | no  |
| bangladesh | pleisiomonas shigelloides              | Bacteria | yes | no  | no  |
| bangladesh | foot-and-mouth disease virus           | Virus    | no  | no  | no  |
| bangladesh | aichi virus                            | Virus    | no  | no  | no  |
| bangladesh | colletotrichum truncatum               | Fungi    | no  | no  | no  |
| bangladesh | campylobacter jejuni                   | Bacteria | yes | yes | yes |
| bangladesh | schistosoma nasale                     | Helminth | no  | no  | no  |
| barbados   | chelonid herpesvirus 5                 | Virus    | no  | no  | no  |
| barbados   | dengue virus                           | Virus    | no  | no  | no  |
| barbados   | human immunodeficiency virus 1         | Virus    | yes | no  | yes |
| belarus    | porcine reproductive and respiratory s | Virus    | no  | no  | no  |
| belarus    | pseudomonas fluorescens                | Bacteria | yes | no  | no  |
| belarus    | hepatitis b virus                      | Virus    | yes | no  | yes |
| belarus    | phyllodistomum folium                  | Helminth | no  | no  | no  |
| belarus    | tick-borne encephalitis virus          | Virus    | no  | no  | no  |
| belarus    | corynebacterium diphtheriae            | Bacteria | yes | no  | yes |
| belarus    | mumps virus                            | Virus    | yes | no  | no  |
| belarus    | human enterovirus c                    | Virus    | yes | no  | no  |
| belarus    | influenza a virus                      | Virus    | yes | yes | yes |
| belarus    | borrelia afzelii                       | Bacteria | no  | no  | no  |
| belarus    | human enterovirus b                    | Virus    | yes | no  | yes |
| belarus    | anaplasma phagocytophilum              | Bacteria | no  | no  | no  |
| belarus    | aspergillus fumigatus                  | Fungi    | no  | no  | no  |
| belarus    | rabies virus                           | Virus    | yes | yes | yes |
| belarus    | pseudomonas putida                     | Bacteria | yes | no  | no  |
| belarus    | pantoea agglomerans                    | Bacteria | yes | yes | no  |
| belarus    | trichobilharzia szidati                | Helminth | no  | no  | no  |
| belarus    | measles virus                          | Virus    | yes | yes | yes |
| belarus    | hepatitis c virus                      | Virus    | yes | no  | yes |
| belarus    | helicobacter pylori                    | Bacteria | yes | yes | no  |
| belarus    | rubella virus                          | Virus    | yes | no  | no  |
| belarus    | borrelia garinii                       | Bacteria | no  | no  | no  |



|         |                                        |          |     |     |     |
|---------|----------------------------------------|----------|-----|-----|-----|
| belarus | human immunodeficiency virus 1         | Virus    | yes | no  | yes |
| belarus | bilharziella polonica                  | Helminth | yes | yes | no  |
| belarus | bovine leukemia virus                  | Virus    | no  | no  | no  |
| belarus | hepatitis a virus                      | Virus    | yes | yes | yes |
| belarus | trichobilharzia franki                 | Helminth | no  | no  | no  |
| belgium | debaryomyces hansenii                  | Fungi    | no  | no  | no  |
| belgium | escherichia coli                       | Bacteria | yes | yes | yes |
| belgium | pseudomonas fragi                      | Bacteria | no  | no  | no  |
| belgium | human respiratory syncytial virus      | Virus    | yes | no  | no  |
| belgium | geomyces destructans                   | Fungi    | no  | no  | no  |
| belgium | hepatitis e virus                      | Virus    | yes | yes | yes |
| belgium | coprinellus domesticus                 | Fungi    | no  | no  | no  |
| belgium | foot-and-mouth disease virus           | Virus    | no  | no  | no  |
| belgium | avian paramyxovirus 4                  | Virus    | no  | no  | no  |
| belgium | pasteurella multocida                  | Bacteria | yes | yes | no  |
| belgium | arcobacter cryaerophilus               | Bacteria | yes | yes | no  |
| belgium | haemophilus parasuis                   | Bacteria | no  | no  | no  |
| belgium | gyrodactylus branchialis               | Helminth | no  | no  | no  |
| belgium | leptospira interrogans                 | Bacteria | yes | yes | yes |
| belgium | agrobacterium tumefaciens              | Bacteria | no  | no  | no  |
| belgium | penicillium polonicum                  | Fungi    | no  | no  | no  |
| belgium | bovine viral diarrhea virus 1          | Virus    | no  | no  | no  |
| belgium | human immunodeficiency virus 2         | Virus    | yes | no  | yes |
| belgium | human parvovirus b19                   | Virus    | no  | no  | no  |
| belgium | arthroderma benhamiae                  | Fungi    | no  | no  | no  |
| belgium | hepatitis c virus                      | Virus    | yes | no  | yes |
| belgium | microbacterium paraoxydans             | Bacteria | no  | no  | no  |
| belgium | aspergillus fumigatus                  | Fungi    | no  | no  | no  |
| belgium | cryptococcus neoformans                | Fungi    | yes | yes | yes |
| belgium | naegleria australiensis                | Protozoa | no  | no  | no  |
| belgium | african swine fever virus              | Virus    | no  | no  | no  |
| belgium | mycobacterium bovis                    | Bacteria | yes | yes | yes |
| belgium | hepatitis b virus                      | Virus    | yes | no  | yes |
| belgium | helicobacter pylori                    | Bacteria | yes | yes | no  |
| belgium | gyrodactylus arcuatus                  | Helminth | no  | no  | no  |
| belgium | porcine reproductive and respiratory s | Virus    | no  | no  | no  |
| belgium | cooperia oncophora                     | Helminth | no  | no  | no  |
| belgium | mycoplasma hyopneumoniae               | Bacteria | no  | no  | no  |
| belgium | ochrobactrum anthropi                  | Bacteria | yes | no  | no  |
| belgium | lichtheimia ramosa                     | Fungi    | no  | no  | no  |
| belgium | pseudomonas chlororaphis               | Bacteria | no  | no  | no  |
| belgium | bovine herpesvirus 1                   | Virus    | no  | no  | no  |
| belgium | wickerhamomyces anomalus               | Fungi    | no  | no  | no  |
| belgium | human coronavirus nl63                 | Virus    | no  | no  | no  |
| belgium | pseudomonas monteilii                  | Bacteria | no  | no  | no  |
| belgium | human enterovirus b                    | Virus    | yes | no  | yes |
| belgium | influenza a virus                      | Virus    | yes | yes | yes |
| belgium | candida albicans                       | Fungi    | yes | yes | yes |
| belgium | babesia divergens                      | Protozoa | yes | yes | no  |
| belgium | trichophyton schoenleinii              | Fungi    | yes | yes | no  |

|         |                                      |          |     |     |     |
|---------|--------------------------------------|----------|-----|-----|-----|
| belgium | <i>yersinia frederiksenii</i>        | Bacteria | yes | yes | no  |
| belgium | <i>gyrodactylus ostendicus</i>       | Helminth | no  | no  | no  |
| belgium | puumala virus                        | Virus    | yes | yes | yes |
| belgium | human rhinovirus a                   | Virus    | yes | no  | no  |
| belgium | <i>babesia capreoli</i>              | Protozoa | no  | no  | no  |
| belgium | <i>streptococcus suis</i>            | Bacteria | yes | yes | no  |
| belgium | <i>bacillus cereus</i>               | Bacteria | yes | yes | no  |
| belgium | <i>lactobacillus ingluviei</i>       | Bacteria | no  | no  | no  |
| belgium | equine infectious anemia virus       | Virus    | no  | no  | no  |
| belgium | <i>yersinia enterocolitica</i>       | Bacteria | yes | yes | yes |
| belgium | <i>acremonium strictum</i>           | Fungi    | yes | no  | no  |
| belgium | <i>aeromonas eucrenophila</i>        | Bacteria | no  | no  | no  |
| belgium | <i>sinorhizobium medicae</i>         | Bacteria | no  | no  | no  |
| belgium | <i>giardia intestinalis</i>          | Protozoa | no  | no  | no  |
| belgium | <i>arcobacter cibarius</i>           | Bacteria | no  | no  | no  |
| belgium | <i>brevibacterium sanguinis</i>      | Bacteria | no  | no  | no  |
| belgium | <i>scedosporium apiospermum</i>      | Fungi    | no  | no  | no  |
| belgium | <i>cryptosporidium baileyi</i>       | Protozoa | no  | no  | no  |
| belgium | <i>anaplasma platys</i>              | Bacteria | no  | no  | no  |
| belgium | <i>volucribacter amazonae</i>        | Bacteria | no  | no  | no  |
| belgium | <i>trichophyton rubrum</i>           | Fungi    | yes | yes | no  |
| belgium | <i>scedosporium dehoogii</i>         | Fungi    | no  | no  | no  |
| belgium | <i>pseudallescheria minutispora</i>  | Fungi    | no  | no  | no  |
| belgium | <i>gallibacterium anatis</i>         | Bacteria | no  | no  | no  |
| belgium | rotavirus a                          | Virus    | yes | yes | yes |
| belgium | <i>ostertagia ostertagi</i>          | Helminth | yes | yes | no  |
| belgium | <i>capnocytophaga canimorsus</i>     | Bacteria | yes | yes | no  |
| belgium | <i>pseudomonas putida</i>            | Bacteria | yes | no  | no  |
| belgium | <i>bacillus flexus</i>               | Bacteria | no  | no  | no  |
| belgium | camelpox virus                       | Virus    | no  | no  | no  |
| belgium | bovine respiratory syncytial virus   | Virus    | no  | no  | no  |
| belgium | <i>staphylococcus aureus</i>         | Bacteria | yes | yes | yes |
| belgium | influenza b virus                    | Virus    | yes | yes | no  |
| belgium | <i>listeria monocytogenes</i>        | Bacteria | yes | yes | yes |
| belgium | <i>avibacterium gallinarum</i>       | Bacteria | no  | no  | no  |
| belgium | <i>trichophyton soudanense</i>       | Fungi    | yes | no  | no  |
| belgium | <i>ajellomyces capsulatus</i>        | Fungi    | no  | no  | no  |
| belgium | <i>achromobacter xylosoxidans</i>    | Bacteria | yes | no  | no  |
| belgium | <i>burkholderia cepacia</i>          | Bacteria | yes | no  | no  |
| belgium | suid herpesvirus 1                   | Virus    | no  | no  | no  |
| belgium | <i>taenia saginata</i>               | Helminth | yes | yes | no  |
| belgium | variola virus                        | Virus    | no  | no  | no  |
| belgium | <i>mycoplasma gallisepticum</i>      | Bacteria | no  | no  | no  |
| belgium | <i>clostridium difficile</i>         | Bacteria | yes | yes | yes |
| belgium | <i>arcobacter trophiarum</i>         | Bacteria | no  | no  | no  |
| belgium | betacoronavirus 1                    | Virus    | no  | no  | no  |
| belgium | <i>mannheimia haemolytica</i>        | Bacteria | no  | no  | no  |
| belgium | <i>heligmosomoides polygyrus</i>     | Helminth | no  | no  | no  |
| belgium | <i>mycobacterium austroafricanum</i> | Bacteria | no  | no  | no  |
| belgium | <i>mesorhizobium loti</i>            | Bacteria | no  | no  | no  |

|         |                                  |          |     |     |     |
|---------|----------------------------------|----------|-----|-----|-----|
| belgium | gyrodactylus micropsi            | Helminth | no  | no  | no  |
| belgium | candida glabrata                 | Fungi    | yes | yes | yes |
| belgium | equid herpesvirus 1              | Virus    | no  | no  | no  |
| belgium | pseudomonas stutzeri             | Bacteria | yes | no  | no  |
| belgium | encephalomyocarditis virus       | Virus    | yes | yes | no  |
| belgium | pseudomonas aeruginosa           | Bacteria | yes | yes | yes |
| belgium | rhodotorula mucilaginosa         | Fungi    | yes | yes | no  |
| belgium | mycobacterium kansasii           | Bacteria | yes | yes | no  |
| belgium | human immunodeficiency virus 1   | Virus    | yes | no  | yes |
| belgium | trichophyton violaceum           | Fungi    | yes | yes | no  |
| belgium | measles virus                    | Virus    | yes | yes | yes |
| belgium | streptococcus gallolyticus       | Bacteria | no  | no  | no  |
| belgium | newcastle disease virus          | Virus    | yes | yes | no  |
| belgium | cordyceps bassiana               | Fungi    | no  | no  | no  |
| belgium | norwalk virus                    | Virus    | yes | no  | yes |
| belgium | gyrodactylus rugiensis           | Helminth | no  | no  | no  |
| belgium | bovine leukemia virus            | Virus    | no  | no  | no  |
| belgium | campylobacter coli               | Bacteria | yes | yes | no  |
| belgium | feline panleukopenia virus       | Virus    | no  | no  | no  |
| belgium | arcobacter skirrowii             | Bacteria | no  | no  | no  |
| belgium | arthroderma otae                 | Fungi    | no  | no  | no  |
| belgium | saccharomyces cerevisiae         | Fungi    | yes | no  | no  |
| belgium | rhizobium cellulosilyticum       | Bacteria | no  | no  | no  |
| belgium | entamoeba coli                   | Protozoa | no  | no  | no  |
| belgium | pseudomonas fluorescens          | Bacteria | yes | no  | no  |
| belize  | oligogonotylus manteri           | Helminth | no  | no  | no  |
| belize  | dengue virus                     | Virus    | no  | no  | no  |
| belize  | newcastle disease virus          | Virus    | yes | yes | no  |
| belize  | leishmania mexicana              | Protozoa | yes | yes | no  |
| belize  | crassicutis cichlasomae          | Helminth | no  | no  | no  |
| belize  | schizophyllum commune            | Fungi    | yes | no  | no  |
| benin   | neisseria gonorrhoeae            | Bacteria | yes | no  | yes |
| benin   | plasmodium falciparum            | Protozoa | yes | no  | yes |
| benin   | human immunodeficiency virus 2   | Virus    | yes | no  | yes |
| benin   | mycobacterium tuberculosis       | Bacteria | yes | yes | yes |
| benin   | plasmodium ovale                 | Protozoa | yes | no  | no  |
| benin   | fusarium solani                  | Fungi    | yes | yes | yes |
| benin   | human enterovirus c              | Virus    | yes | no  | no  |
| benin   | human immunodeficiency virus 1   | Virus    | yes | no  | yes |
| benin   | rabies virus                     | Virus    | yes | yes | yes |
| benin   | hepatitis b virus                | Virus    | yes | no  | yes |
| benin   | onchocerca volvulus              | Helminth | yes | yes | yes |
| benin   | measles virus                    | Virus    | yes | yes | yes |
| benin   | african swine fever virus        | Virus    | no  | no  | no  |
| benin   | variola virus                    | Virus    | no  | no  | no  |
| benin   | chlamydia trachomatis            | Bacteria | yes | yes | yes |
| benin   | monkeypox virus                  | Virus    | yes | yes | yes |
| bhutan  | dengue virus                     | Virus    | no  | no  | no  |
| bhutan  | foot-and-mouth disease virus     | Virus    | no  | no  | no  |
| bhutan  | peste-des-petits-ruminants virus | Virus    | no  | no  | no  |

|                       |                                      |          |     |     |     |
|-----------------------|--------------------------------------|----------|-----|-----|-----|
| bhutan                | leishmania donovani                  | Protozoa | yes | yes | yes |
| bolivia               | trypanosoma cruzi                    | Protozoa | yes | yes | yes |
| bolivia               | mayaro virus                         | Virus    | yes | yes | yes |
| bolivia               | escherichia coli                     | Bacteria | yes | yes | yes |
| bolivia               | yersinia pestis                      | Bacteria | yes | yes | yes |
| bolivia               | venezuelan equine encephalitis virus | Virus    | yes | yes | yes |
| bolivia               | hepatitis b virus                    | Virus    | yes | no  | yes |
| bolivia               | primate t-lymphotropic virus 1       | Virus    | no  | no  | no  |
| bolivia               | sporothrix schenckii                 | Fungi    | yes | yes | no  |
| bolivia               | fasciola hepatica                    | Helminth | yes | yes | no  |
| bolivia               | trypanosoma evansi                   | Protozoa | no  | no  | no  |
| bolivia               | yellow fever virus                   | Virus    | yes | yes | yes |
| bolivia               | leishmania lainsoni                  | Protozoa | yes | yes | no  |
| bolivia               | andes virus                          | Virus    | yes | yes | yes |
| bolivia               | leishmania braziliensis              | Protozoa | yes | yes | no  |
| bolivia               | human immunodeficiency virus 1       | Virus    | yes | no  | yes |
| bolivia               | trypanosoma dionisii                 | Protozoa | no  | no  | no  |
| bolivia               | fusarium solani                      | Fungi    | yes | yes | yes |
| bolivia               | machupo virus                        | Virus    | yes | yes | yes |
| bolivia               | influenza a virus                    | Virus    | yes | yes | yes |
| bolivia               | epidermophyton floccosum             | Fungi    | yes | yes | no  |
| bolivia               | tritrichomonas mobilensis            | Protozoa | no  | no  | no  |
| bolivia               | salmon pancreas disease virus        | Virus    | no  | no  | no  |
| bolivia               | rio mamore virus                     | Virus    | no  | no  | no  |
| bolivia               | measles virus                        | Virus    | yes | yes | yes |
| bolivia               | mansonella ozzardi                   | Helminth | yes | no  | no  |
| bolivia               | balantidium coli                     | Protozoa | yes | yes | no  |
| bolivia               | pseudomonas putida                   | Bacteria | yes | no  | no  |
| bolivia               | dengue virus                         | Virus    | no  | no  | no  |
| bolivia               | human respiratory syncytial virus    | Virus    | yes | no  | no  |
| bolivia               | bacillus cereus                      | Bacteria | yes | yes | no  |
| bolivia               | citrobacter freundii                 | Bacteria | yes | yes | no  |
| bonaire, saint eustaz | helicobacter pylori                  | Bacteria | yes | yes | no  |
| bosnia and herzegc    | campylobacter coli                   | Bacteria | yes | yes | no  |
| bosnia and herzegc    | influenza a virus                    | Virus    | yes | yes | yes |
| bosnia and herzegc    | bluetongue virus                     | Virus    | no  | no  | no  |
| bosnia and herzegc    | rubella virus                        | Virus    | yes | no  | no  |
| bosnia and herzegc    | anoplocephaloides dentata            | Helminth | no  | no  | no  |
| bosnia and herzegc    | skrjabinotaenia lobata               | Helminth | no  | no  | no  |
| bosnia and herzegc    | rabies virus                         | Virus    | yes | yes | yes |
| bosnia and herzegc    | equine infectious anemia virus       | Virus    | no  | no  | no  |
| bosnia and herzegc    | hepatitis c virus                    | Virus    | yes | no  | yes |
| botswana              | foot-and-mouth disease virus         | Virus    | no  | no  | no  |
| botswana              | feline immunodeficiency virus        | Virus    | no  | no  | no  |
| botswana              | rabies virus                         | Virus    | yes | yes | yes |
| botswana              | cryptococcus neoformans              | Fungi    | yes | yes | yes |
| botswana              | human immunodeficiency virus 2       | Virus    | yes | no  | yes |
| botswana              | measles virus                        | Virus    | yes | yes | yes |
| botswana              | human herpesvirus 8                  | Virus    | yes | no  | yes |
| botswana              | plasmodium relictum                  | Protozoa | no  | no  | no  |

|          |                                 |          |     |     |     |
|----------|---------------------------------|----------|-----|-----|-----|
| botswana | bovine enterovirus              | Virus    | no  | no  | no  |
| botswana | african swine fever virus       | Virus    | no  | no  | no  |
| botswana | human immunodeficiency virus 1  | Virus    | yes | no  | yes |
| brazil   | leishmania infantum             | Protozoa | yes | yes | yes |
| brazil   | scedosporium apiospermum        | Fungi    | no  | no  | no  |
| brazil   | candida humilis                 | Fungi    | no  | no  | no  |
| brazil   | visna/maedi virus               | Virus    | no  | no  | no  |
| brazil   | trypanosoma evansi              | Protozoa | no  | no  | no  |
| brazil   | preussia africana               | Fungi    | no  | no  | no  |
| brazil   | aspergillus flavus              | Fungi    | no  | no  | no  |
| brazil   | hepatozoon canis                | Protozoa | no  | no  | no  |
| brazil   | fusarium chlamydosporum         | Fungi    | yes | no  | no  |
| brazil   | ehrlichia chaffeensis           | Bacteria | yes | yes | yes |
| brazil   | angiostrongylus costaricensis   | Helminth | no  | no  | no  |
| brazil   | mayaro virus                    | Virus    | yes | yes | yes |
| brazil   | bk polyomavirus                 | Virus    | no  | no  | no  |
| brazil   | streptococcus agalactiae        | Bacteria | yes | yes | no  |
| brazil   | leishmania amazonensis          | Protozoa | yes | yes | no  |
| brazil   | enterococcus faecalis           | Bacteria | yes | yes | yes |
| brazil   | escherichia coli                | Bacteria | yes | yes | yes |
| brazil   | citrobacter freundii            | Bacteria | yes | yes | no  |
| brazil   | trypanosoma dionisii            | Protozoa | no  | no  | no  |
| brazil   | taenia saginata                 | Helminth | yes | yes | no  |
| brazil   | conidiobolus lamprauges         | Fungi    | yes | yes | no  |
| brazil   | infectious bursal disease virus | Virus    | no  | no  | no  |
| brazil   | bovine papillomavirus 3         | Virus    | no  | no  | no  |
| brazil   | candida parapsilosis            | Fungi    | yes | yes | no  |
| brazil   | serratia marcescens             | Bacteria | yes | yes | yes |
| brazil   | mycobacterium scrofulaceum      | Bacteria | yes | yes | no  |
| brazil   | anaplasma marginale             | Bacteria | no  | no  | no  |
| brazil   | mycobacterium leprae            | Bacteria | yes | yes | yes |
| brazil   | gibsoniela meursaulti           | Helminth | no  | no  | no  |
| brazil   | leishmania donovani             | Protozoa | yes | yes | yes |
| brazil   | endorchis piraeeba              | Helminth | no  | no  | no  |
| brazil   | phanerochaete sordida           | Fungi    | no  | no  | no  |
| brazil   | streptococcus equi              | Bacteria | yes | yes | no  |
| brazil   | scytalidium hyalinum            | Fungi    | yes | no  | no  |
| brazil   | potamotrygonocotyle aramasae    | Helminth | no  | no  | no  |
| brazil   | amphoteromorphus ninoi          | Helminth | no  | no  | no  |
| brazil   | feline immunodeficiency virus   | Virus    | no  | no  | no  |
| brazil   | dengue virus                    | Virus    | no  | no  | no  |
| brazil   | frog virus 3                    | Virus    | no  | no  | no  |
| brazil   | zygobothrium megacephalum       | Helminth | no  | no  | no  |
| brazil   | trichuris trichiura             | Helminth | yes | yes | no  |
| brazil   | human coronavirus 229e          | Virus    | yes | no  | no  |
| brazil   | sporothrix schenckii            | Fungi    | yes | yes | no  |
| brazil   | aeromonas caviae                | Bacteria | yes | yes | yes |
| brazil   | trypanosoma theileri            | Protozoa | no  | no  | no  |
| brazil   | aeromonas veronii               | Bacteria | yes | no  | yes |
| brazil   | sporothrix brasiliensis         | Fungi    | no  | no  | no  |

|        |                                     |          |     |     |     |
|--------|-------------------------------------|----------|-----|-----|-----|
| brazil | influenza a virus                   | Virus    | yes | yes | yes |
| brazil | human metapneumovirus               | Virus    | no  | no  | no  |
| brazil | marituba virus                      | Virus    | yes | yes | no  |
| brazil | bacillus thuringiensis              | Bacteria | yes | no  | no  |
| brazil | leishmania braziliensis             | Protozoa | yes | yes | no  |
| brazil | bacillus endophyticus               | Bacteria | no  | no  | no  |
| brazil | bluetongue virus                    | Virus    | no  | no  | no  |
| brazil | mycobacterium intracellulare        | Bacteria | no  | no  | no  |
| brazil | human papillomavirus 6              | Virus    | no  | no  | no  |
| brazil | trypanosoma cascavelli              | Protozoa | no  | no  | no  |
| brazil | vaccinia virus                      | Virus    | no  | no  | no  |
| brazil | wuchereria bancrofti                | Helminth | yes | no  | yes |
| brazil | chlamydia trachomatis               | Bacteria | yes | yes | yes |
| brazil | mapuera virus                       | Virus    | no  | no  | no  |
| brazil | ajellomyces capsulatus              | Fungi    | no  | no  | no  |
| brazil | shigella boydii                     | Bacteria | yes | yes | no  |
| brazil | arthroderma gypseum                 | Fungi    | no  | no  | no  |
| brazil | bovine viral diarrhea virus 1       | Virus    | no  | no  | no  |
| brazil | potamostrongylocotyle rarum         | Helminth | no  | no  | no  |
| brazil | lactobacillus fermentum             | Bacteria | no  | no  | no  |
| brazil | phaeoacremonium venezuelense        | Fungi    | no  | no  | no  |
| brazil | libystrongylus douglasi             | Helminth | no  | no  | no  |
| brazil | rio mamore virus                    | Virus    | no  | no  | no  |
| brazil | rotavirus c                         | Virus    | yes | yes | yes |
| brazil | yellow fever virus                  | Virus    | yes | yes | yes |
| brazil | rickettsia conorii                  | Bacteria | yes | yes | no  |
| brazil | neisseria meningitidis              | Bacteria | yes | no  | yes |
| brazil | suid herpesvirus 1                  | Virus    | no  | no  | no  |
| brazil | epizootic hemorrhagic disease virus | Virus    | no  | no  | no  |
| brazil | trypanosoma lewisi                  | Protozoa | no  | no  | no  |
| brazil | penicillium citrinum                | Fungi    | yes | no  | no  |
| brazil | st. louis encephalitis virus        | Virus    | yes | yes | yes |
| brazil | kocuria marina                      | Bacteria | no  | no  | no  |
| brazil | cryptococcus laurentii              | Fungi    | no  | no  | no  |
| brazil | batrachochytrium dendrobatidis      | Fungi    | no  | no  | no  |
| brazil | fusarium solani                     | Fungi    | yes | yes | yes |
| brazil | vibrio mimicus                      | Bacteria | yes | yes | no  |
| brazil | echinococcus ortleppi               | Helminth | no  | no  | no  |
| brazil | crepidobothrium eirasi              | Helminth | no  | no  | no  |
| brazil | fonsecaea pedrosoi                  | Fungi    | no  | no  | no  |
| brazil | enterobacter ludwigii               | Bacteria | no  | no  | no  |
| brazil | andes virus                         | Virus    | yes | yes | yes |
| brazil | rotavirus a                         | Virus    | yes | yes | yes |
| brazil | angiostrongylus vasorum             | Helminth | no  | no  | no  |
| brazil | entamoeba histolytica               | Protozoa | yes | yes | no  |
| brazil | salmonella enterica                 | Bacteria | no  | no  | no  |
| brazil | onchocerca volvulus                 | Helminth | yes | yes | yes |
| brazil | mycobacterium lepromatosis          | Bacteria | no  | no  | no  |
| brazil | toxoplasma gondii                   | Protozoa | yes | yes | yes |
| brazil | theileria orientalis                | Protozoa | no  | no  | no  |

|        |                                    |          |     |     |     |
|--------|------------------------------------|----------|-----|-----|-----|
| brazil | bovine respiratory syncytial virus | Virus    | no  | no  | no  |
| brazil | human parechovirus                 | Virus    | no  | no  | no  |
| brazil | mansonella ozzardi                 | Helminth | yes | no  | no  |
| brazil | lactobacillus delbrueckii          | Bacteria | no  | no  | no  |
| brazil | beak and feather disease virus     | Virus    | no  | no  | no  |
| brazil | piedraia hortae                    | Fungi    | yes | yes | no  |
| brazil | fusarium subglutinans              | Fungi    | yes | no  | no  |
| brazil | pestalotiopsis microspora          | Fungi    | no  | no  | no  |
| brazil | escherichia albertii               | Bacteria | no  | no  | no  |
| brazil | hepatitis a virus                  | Virus    | yes | yes | yes |
| brazil | ascaris lumbricoides               | Helminth | yes | yes | no  |
| brazil | feline leukemia virus              | Virus    | no  | no  | no  |
| brazil | babesia vitalii                    | Protozoa | no  | no  | no  |
| brazil | penicillium citreonigrum           | Fungi    | no  | no  | no  |
| brazil | alternaria alternata               | Fungi    | yes | yes | no  |
| brazil | leptospira interrogans             | Bacteria | yes | yes | yes |
| brazil | aspergillus niger                  | Fungi    | yes | yes | no  |
| brazil | torque teno sus virus 1            | Virus    | no  | no  | no  |
| brazil | pepper mild mottle virus           | Virus    | no  | no  | no  |
| brazil | measles virus                      | Virus    | yes | yes | yes |
| brazil | goezeella siluri                   | Helminth | no  | no  | no  |
| brazil | trypanosoma rangeli                | Protozoa | no  | no  | no  |
| brazil | oriboca virus                      | Virus    | yes | yes | no  |
| brazil | ilheus virus                       | Virus    | yes | yes | no  |
| brazil | pichia kudriavzevii                | Fungi    | no  | no  | no  |
| brazil | pseudomonas fluorescens            | Bacteria | yes | no  | no  |
| brazil | mycobacterium simiae               | Bacteria | yes | yes | no  |
| brazil | toxocara canis                     | Helminth | yes | yes | no  |
| brazil | kluvera ascorbata                  | Bacteria | yes | yes | no  |
| brazil | verticillium leptobactrum          | Fungi    | no  | no  | no  |
| brazil | mycobacterium avium                | Bacteria | yes | yes | yes |
| brazil | cordyceps bassiana                 | Fungi    | no  | no  | no  |
| brazil | sapporo virus                      | Virus    | no  | no  | no  |
| brazil | orf virus                          | Virus    | yes | yes | no  |
| brazil | rift valley fever virus            | Virus    | yes | yes | yes |
| brazil | angiostrongylus cantonensis        | Helminth | yes | no  | no  |
| brazil | torque teno sus virus 2            | Virus    | no  | no  | no  |
| brazil | mycobacterium tuberculosis         | Bacteria | yes | yes | yes |
| brazil | ovine herpesvirus 2                | Virus    | no  | no  | no  |
| brazil | enterobacter cloacae               | Bacteria | yes | yes | no  |
| brazil | porcine parvovirus                 | Virus    | no  | no  | no  |
| brazil | human herpesvirus 6                | Virus    | yes | no  | no  |
| brazil | mycoplasma haemofelis              | Bacteria | no  | no  | no  |
| brazil | enterobacter aerogenes             | Bacteria | yes | yes | no  |
| brazil | cylindrocladiella peruviana        | Fungi    | no  | no  | no  |
| brazil | anisakis physeteris                | Helminth | yes | yes | no  |
| brazil | human rhinovirus b                 | Virus    | yes | no  | no  |
| brazil | primate t-lymphotropic virus 1     | Virus    | no  | no  | no  |
| brazil | mycobacterium bovis                | Bacteria | yes | yes | yes |
| brazil | human adenovirus c                 | Virus    | yes | no  | no  |

|        |                               |          |     |     |     |
|--------|-------------------------------|----------|-----|-----|-----|
| brazil | plasmodium vivax              | Protozoa | yes | no  | yes |
| brazil | mycobacterium neoaurum        | Bacteria | no  | no  | no  |
| brazil | babesia canis                 | Protozoa | no  | no  | no  |
| brazil | burkholderia pseudomallei     | Bacteria | yes | yes | no  |
| brazil | human papillomavirus 26       | Virus    | no  | no  | no  |
| brazil | hepatitis c virus             | Virus    | yes | no  | yes |
| brazil | feline calicivirus            | Virus    | no  | no  | no  |
| brazil | candida orthopsilosis         | Fungi    | no  | no  | no  |
| brazil | bartonella clarridgeiae       | Bacteria | no  | no  | no  |
| brazil | arcanobacterium pyogenes      | Bacteria | yes | yes | no  |
| brazil | burkholderia fungorum         | Bacteria | no  | no  | no  |
| brazil | cryptococcus gattii           | Fungi    | no  | no  | no  |
| brazil | paecilomyces variotii         | Fungi    | yes | yes | no  |
| brazil | kurthia gibsonii              | Bacteria | no  | no  | no  |
| brazil | staphylococcus aureus         | Bacteria | yes | yes | yes |
| brazil | corynebacterium ulcerans      | Bacteria | yes | yes | no  |
| brazil | sporothrix mexicana           | Fungi    | no  | no  | no  |
| brazil | cryptosporidium baileyi       | Protozoa | no  | no  | no  |
| brazil | pseudomonas putida            | Bacteria | yes | no  | no  |
| brazil | cryptococcus neoformans       | Fungi    | yes | yes | yes |
| brazil | leishmania guyanensis         | Protozoa | yes | yes | no  |
| brazil | ophiotaenia jarara            | Helminth | no  | no  | no  |
| brazil | botryosphaeria rhodina        | Fungi    | no  | no  | no  |
| brazil | candida albicans              | Fungi    | yes | yes | yes |
| brazil | dirofilaria immitis           | Helminth | yes | yes | no  |
| brazil | paenibacillus thiaminolyticus | Bacteria | no  | no  | no  |
| brazil | swinepox virus                | Virus    | no  | no  | no  |
| brazil | diphyllobothrium latum        | Helminth | yes | yes | no  |
| brazil | candida inconspicua           | Fungi    | no  | no  | no  |
| brazil | human papillomavirus 18       | Virus    | no  | no  | no  |
| brazil | acinetobacter baumannii       | Bacteria | yes | no  | no  |
| brazil | pseudallescheria boydii       | Fungi    | no  | no  | no  |
| brazil | fowl adenovirus e             | Virus    | no  | no  | no  |
| brazil | human adenovirus f            | Virus    | yes | no  | no  |
| brazil | plasmodium falciparum         | Protozoa | yes | no  | yes |
| brazil | entamoeba coli                | Protozoa | no  | no  | no  |
| brazil | candida tropicalis            | Fungi    | yes | yes | no  |
| brazil | chaetomium globosum           | Fungi    | yes | no  | no  |
| brazil | simbu virus                   | Virus    | no  | no  | no  |
| brazil | haemophilus influenzae        | Bacteria | yes | no  | yes |
| brazil | plasmodium juxtannucleare     | Protozoa | no  | no  | no  |
| brazil | rickettsia rickettsii         | Bacteria | yes | yes | no  |
| brazil | schistosoma mansoni           | Helminth | yes | yes | yes |
| brazil | human coronavirus hku1        | Virus    | no  | no  | no  |
| brazil | shigella flexneri             | Bacteria | yes | yes | no  |
| brazil | hepatitis delta virus         | Virus    | yes | no  | no  |
| brazil | dietzia maris                 | Bacteria | no  | no  | no  |
| brazil | chromobacterium violaceum     | Bacteria | yes | yes | no  |
| brazil | arthroderma otae              | Fungi    | no  | no  | no  |
| brazil | xanthomonas campestris        | Bacteria | no  | no  | no  |



|        |                                    |          |     |     |     |
|--------|------------------------------------|----------|-----|-----|-----|
| brazil | eastern equine encephalitis virus  | Virus    | yes | yes | yes |
| brazil | trichosporon asahii                | Fungi    | yes | yes | no  |
| brazil | norwalk virus                      | Virus    | yes | no  | yes |
| brazil | klebsiella pneumoniae              | Bacteria | yes | yes | yes |
| brazil | human herpesvirus 3                | Virus    | no  | no  | no  |
| brazil | clavispora lusitaniae              | Fungi    | no  | no  | no  |
| brazil | giardia intestinalis               | Protozoa | no  | no  | no  |
| brazil | human astrovirus                   | Virus    | yes | no  | yes |
| brazil | rotavirus d                        | Virus    | yes | yes | no  |
| brazil | burkholderia tropica               | Bacteria | no  | no  | no  |
| brazil | psittacid herpesvirus 1            | Virus    | no  | no  | no  |
| brazil | streptococcus pyogenes             | Bacteria | yes | yes | yes |
| brazil | pseudomonas mosselii               | Bacteria | no  | no  | no  |
| brazil | cytauxzoon felis                   | Protozoa | no  | no  | no  |
| brazil | bovine viral diarrhea virus 2      | Virus    | no  | no  | no  |
| brazil | trypanosoma vivax                  | Protozoa | no  | no  | no  |
| brazil | canine distemper virus             | Virus    | no  | no  | no  |
| brazil | propionibacterium acnes            | Bacteria | yes | yes | no  |
| brazil | enterobius vermicularis            | Helminth | yes | yes | no  |
| brazil | african swine fever virus          | Virus    | no  | no  | no  |
| brazil | brugia malayi                      | Helminth | yes | yes | no  |
| brazil | aspergillus fumigatus              | Fungi    | no  | no  | no  |
| brazil | acremonium strictum                | Fungi    | yes | no  | no  |
| brazil | hammondia heydorni                 | Protozoa | no  | no  | no  |
| brazil | haemophilus parainfluenzae         | Bacteria | yes | no  | no  |
| brazil | cryptosporidium meleagridis        | Protozoa | no  | no  | no  |
| brazil | streptococcus pneumoniae           | Bacteria | yes | yes | yes |
| brazil | bartonella henselae                | Bacteria | yes | yes | no  |
| brazil | chicken astrovirus                 | Virus    | no  | no  | no  |
| brazil | caraparuvirus                      | Virus    | yes | yes | no  |
| brazil | agrobacterium rhizogenes           | Bacteria | no  | no  | no  |
| brazil | vibrio pomeroyi                    | Bacteria | no  | no  | no  |
| brazil | human herpesvirus 8                | Virus    | yes | no  | yes |
| brazil | human parvovirus b19               | Virus    | no  | no  | no  |
| brazil | human papillomavirus 61            | Virus    | no  | no  | no  |
| brazil | nomimoscolex sudobim               | Helminth | no  | no  | no  |
| brazil | coxiella burnetii                  | Bacteria | yes | yes | no  |
| brazil | gyrodactylus corydori              | Helminth | no  | no  | no  |
| brazil | enterococcus hirae                 | Bacteria | yes | yes | no  |
| brazil | cochliobolus lunatus               | Fungi    | no  | no  | no  |
| brazil | parvimonas micra                   | Bacteria | no  | no  | no  |
| brazil | proteocephalus hemioliopteri       | Helminth | no  | no  | no  |
| brazil | morganella morganii                | Bacteria | yes | yes | no  |
| brazil | human immunodeficiency virus 1     | Virus    | yes | no  | yes |
| brazil | wickerhamomyces anomalus           | Fungi    | no  | no  | no  |
| brazil | vibrio cholerae                    | Bacteria | yes | no  | yes |
| brazil | peltidocotyle lenha                | Helminth | no  | no  | no  |
| brazil | corynebacterium tuberculostearicum | Bacteria | no  | no  | no  |
| brazil | borrelia burgdorferi               | Bacteria | yes | yes | yes |
| brazil | fusarium oxysporum                 | Fungi    | yes | no  | yes |

|        |                                      |          |     |     |     |
|--------|--------------------------------------|----------|-----|-----|-----|
| brazil | cryptosporidium parvum               | Protozoa | yes | yes | yes |
| brazil | echinococcus granulosus              | Helminth | yes | yes | yes |
| brazil | mycobacterium kansasii               | Bacteria | yes | yes | no  |
| brazil | human enterovirus b                  | Virus    | yes | no  | yes |
| brazil | aureobasidium pullulans              | Fungi    | yes | no  | no  |
| brazil | babesia bovis                        | Protozoa | yes | yes | no  |
| brazil | human rhinovirus a                   | Virus    | yes | no  | no  |
| brazil | staphylococcus sciuri                | Bacteria | no  | no  | no  |
| brazil | pantoea agglomerans                  | Bacteria | yes | yes | no  |
| brazil | human herpesvirus 4                  | Virus    | no  | no  | no  |
| brazil | burkholderia cenocepacia             | Bacteria | no  | no  | no  |
| brazil | aelurostrongylus abstrusus           | Helminth | no  | no  | no  |
| brazil | equid herpesvirus 3                  | Virus    | no  | no  | no  |
| brazil | bacillus subtilis                    | Bacteria | yes | yes | no  |
| brazil | amphoteromorphus piraeeba            | Helminth | no  | no  | no  |
| brazil | candida intermedia                   | Fungi    | yes | no  | no  |
| brazil | epicoccum nigrum                     | Fungi    | no  | no  | no  |
| brazil | laciazia lobo                        | Fungi    | no  | no  | no  |
| brazil | staphylococcus pasteurii             | Bacteria | no  | no  | no  |
| brazil | mycobacterium bolletii               | Bacteria | no  | no  | no  |
| brazil | acinetobacter junii                  | Bacteria | yes | no  | no  |
| brazil | rabies virus                         | Virus    | yes | yes | yes |
| brazil | avian coronavirus                    | Virus    | no  | no  | no  |
| brazil | turkey astrovirus                    | Virus    | no  | no  | no  |
| brazil | venezuelan equine encephalitis virus | Virus    | yes | yes | yes |
| brazil | primate t-lymphotropic virus 2       | Virus    | no  | no  | no  |
| brazil | human papillomavirus 16              | Virus    | no  | no  | no  |
| brazil | neospora caninum                     | Protozoa | no  | no  | no  |
| brazil | nomimoscolex piraeeba                | Helminth | no  | no  | no  |
| brazil | newcastle disease virus              | Virus    | yes | yes | no  |
| brazil | mycoplasma hyorhinis                 | Bacteria | no  | no  | no  |
| brazil | variola virus                        | Virus    | no  | no  | no  |
| brazil | malassezia sympodialis               | Fungi    | yes | yes | no  |
| brazil | streptococcus dysgalactiae           | Bacteria | no  | no  | no  |
| brazil | proteocephalus pirarara              | Helminth | no  | no  | no  |
| brazil | candida glabrata                     | Fungi    | yes | yes | yes |
| brazil | meyerozyma guilliermondii            | Fungi    | no  | no  | no  |
| brazil | calyptospora serrasalmi              | Protozoa | no  | no  | no  |
| brazil | human papillomavirus 53              | Virus    | no  | no  | no  |
| brazil | taenia solium                        | Helminth | yes | no  | yes |
| brazil | mycoplasma haemocanis                | Bacteria | no  | no  | no  |
| brazil | bacillus cereus                      | Bacteria | yes | yes | no  |
| brazil | nomimoscolex suspectus               | Helminth | no  | no  | no  |
| brazil | colletotrichum truncatum             | Fungi    | no  | no  | no  |
| brazil | human respiratory syncytial virus    | Virus    | yes | no  | no  |
| brazil | human enterovirus a                  | Virus    | yes | no  | no  |
| brazil | chicken anemia virus                 | Virus    | no  | no  | no  |
| brazil | ectromelia virus                     | Virus    | no  | no  | no  |
| brazil | clostridium difficile                | Bacteria | yes | yes | yes |
| brazil | corynebacterium diphtheriae          | Bacteria | yes | no  | yes |

|        |                                      |          |     |     |     |
|--------|--------------------------------------|----------|-----|-----|-----|
| brazil | ehrlichia ewingii                    | Bacteria | yes | yes | yes |
| brazil | listeria monocytogenes               | Bacteria | yes | yes | yes |
| brazil | aichi virus                          | Virus    | no  | no  | no  |
| brazil | human immunodeficiency virus 2       | Virus    | yes | no  | yes |
| brazil | aeromonas hydrophila                 | Bacteria | yes | yes | yes |
| brazil | cryptosporidium canis                | Protozoa | no  | no  | no  |
| brazil | bovine leukemia virus                | Virus    | no  | no  | no  |
| brazil | ehrlichia canis                      | Bacteria | no  | no  | no  |
| brazil | ephedrocephalus microcephalus        | Helminth | no  | no  | no  |
| brazil | cercopithecine herpesvirus 5         | Virus    | no  | no  | no  |
| brazil | strongyloides stercoralis            | Helminth | yes | yes | yes |
| brazil | hepatitis e virus                    | Virus    | yes | yes | yes |
| brazil | fowlpox virus                        | Virus    | no  | no  | no  |
| brazil | trypanosoma cruzi                    | Protozoa | yes | yes | yes |
| brazil | hepatitis b virus                    | Virus    | yes | no  | yes |
| brazil | foot-and-mouth disease virus         | Virus    | no  | no  | no  |
| brazil | trichoderma longibrachiatum          | Fungi    | no  | no  | no  |
| brazil | mycobacterium terrae                 | Bacteria | no  | no  | no  |
| brazil | acinetobacter johnsonii              | Bacteria | yes | no  | no  |
| brazil | betacoronavirus 1                    | Virus    | no  | no  | no  |
| brazil | trichophyton rubrum                  | Fungi    | yes | yes | no  |
| brazil | pseudomonas aeruginosa               | Bacteria | yes | yes | yes |
| brazil | anisakis typica                      | Helminth | no  | no  | no  |
| brazil | oropouche virus                      | Virus    | yes | yes | yes |
| brazil | gallid herpesvirus 1                 | Virus    | no  | no  | no  |
| brazil | providencia rettgeri                 | Bacteria | yes | yes | no  |
| brazil | caprine arthritis encephalitis virus | Virus    | no  | no  | no  |
| brazil | leishmania enriettii                 | Protozoa | no  | no  | no  |
| brazil | babesia bigemina                     | Protozoa | no  | no  | no  |
| brazil | jc polyomavirus                      | Virus    | no  | no  | no  |
| brazil | nomimoscolex admonticellia           | Helminth | no  | no  | no  |
| brazil | helicobacter pylori                  | Bacteria | yes | yes | no  |
| brazil | mycoplasma hyopneumoniae             | Bacteria | no  | no  | no  |
| brazil | paecilomyces lilacinus               | Fungi    | yes | yes | no  |
| brazil | hymenolepis nana                     | Helminth | yes | yes | no  |
| brazil | harriscolex kaparari                 | Helminth | no  | no  | no  |
| brazil | staphylococcus epidermidis           | Bacteria | yes | yes | yes |
| brazil | kluveria cryocrescens                | Bacteria | yes | yes | no  |
| brazil | alphacoronavirus 1                   | Virus    | no  | no  | no  |
| brazil | lysibacillus sphaericus              | Bacteria | no  | no  | no  |
| brazil | acinetobacter haemolyticus           | Bacteria | yes | no  | no  |
| brazil | classical swine fever virus          | Virus    | no  | no  | no  |
| brazil | saccharomyces cerevisiae             | Fungi    | yes | no  | no  |
| brazil | human enterovirus c                  | Virus    | yes | no  | no  |
| brazil | bovine herpesvirus 4                 | Virus    | no  | no  | no  |
| brazil | gibberella moniliformis              | Fungi    | no  | no  | no  |
| brazil | leishmania chagasi                   | Protozoa | yes | yes | no  |
| brazil | stenotrophomonas maltophilia         | Bacteria | no  | no  | no  |
| brazil | avian metapneumovirus                | Virus    | no  | no  | no  |
| brazil | mumps virus                          | Virus    | yes | no  | no  |

|                       |                                 |          |     |     |     |
|-----------------------|---------------------------------|----------|-----|-----|-----|
| brazil                | bovine herpesvirus 5            | Virus    | no  | no  | no  |
| brazil                | burkholderia cepacia            | Bacteria | yes | no  | no  |
| brazil                | enterococcus faecium            | Bacteria | yes | yes | yes |
| brazil                | microbacterium testaceum        | Bacteria | no  | no  | no  |
| brazil                | schizophyllum commune           | Fungi    | yes | no  | no  |
| brazil                | nomimoscolex lenha              | Helminth | no  | no  | no  |
| brazil                | fonsecaea monophora             | Fungi    | no  | no  | no  |
| brazil                | fusarium polyphialidicum        | Fungi    | no  | no  | no  |
| brazil                | leishmania mexicana             | Protozoa | yes | yes | no  |
| brazil                | anaplasma platys                | Bacteria | no  | no  | no  |
| brazil                | equid herpesvirus 1             | Virus    | no  | no  | no  |
| brazil                | aspergillus penicillioides      | Fungi    | no  | no  | no  |
| brazil                | bovine herpesvirus 1            | Virus    | no  | no  | no  |
| brazil                | feline panleukopenia virus      | Virus    | no  | no  | no  |
| brazil                | cryptosporidium andersoni       | Protozoa | no  | no  | no  |
| brazil                | influenza b virus               | Virus    | yes | yes | no  |
| brazil                | rubella virus                   | Virus    | yes | no  | no  |
| brazil                | human enterovirus d             | Virus    | yes | no  | no  |
| brazil                | cryptosporidium felis           | Protozoa | no  | no  | no  |
| brazil                | dictyocaulus viviparus          | Helminth | no  | no  | no  |
| brazil                | yersinia pestis                 | Bacteria | yes | yes | yes |
| brazil                | paracoccidioides brasiliensis   | Fungi    | yes | yes | no  |
| brazil                | neoscytalidium dimidiatum       | Fungi    | no  | no  | no  |
| brazil                | potamotrygonocotyle rionegrense | Helminth | no  | no  | no  |
| brazil                | raoultella ornithinolytica      | Bacteria | no  | no  | no  |
| brazil                | sinorhizobium medicae           | Bacteria | no  | no  | no  |
| brazil                | micrococcus luteus              | Bacteria | no  | no  | no  |
| brazil                | hepatozoon felis                | Protozoa | no  | no  | no  |
| brazil                | microbacterium esteraromaticum  | Bacteria | no  | no  | no  |
| brazil                | exophiala spinifera             | Fungi    | yes | yes | no  |
| brazil                | candida ethanolica              | Fungi    | no  | no  | no  |
| brazil                | cladosporium cladosporioides    | Fungi    | yes | no  | no  |
| brazil                | echinostoma paraensei           | Helminth | no  | no  | no  |
| brazil                | rhodotorula mucilaginosa        | Fungi    | yes | yes | no  |
| brazil                | comamonas testosteroni          | Bacteria | yes | no  | no  |
| brazil                | klebsiella oxytoca              | Bacteria | yes | yes | no  |
| brazil                | human rhinovirus c              | Virus    | no  | no  | no  |
| british virgin island | dengue virus                    | Virus    | no  | no  | no  |
| brunei                | dengue virus                    | Virus    | no  | no  | no  |
| brunei                | human enterovirus a             | Virus    | yes | no  | no  |
| bulgaria              | cordyceps bassiana              | Fungi    | no  | no  | no  |
| bulgaria              | doratomyces stemonitis          | Fungi    | yes | no  | no  |
| bulgaria              | bluetongue virus                | Virus    | no  | no  | no  |
| bulgaria              | dobrava-belgrade virus          | Virus    | yes | yes | no  |
| bulgaria              | human immunodeficiency virus 1  | Virus    | yes | no  | yes |
| bulgaria              | penicillium polonicum           | Fungi    | no  | no  | no  |
| bulgaria              | bacillus subtilis               | Bacteria | yes | yes | no  |
| bulgaria              | influenza a virus               | Virus    | yes | yes | yes |
| bulgaria              | echinostoma revolutum           | Helminth | yes | yes | no  |
| bulgaria              | penicillium griseofulvum        | Fungi    | no  | no  | no  |

|              |                                       |          |     |     |     |
|--------------|---------------------------------------|----------|-----|-----|-----|
| bulgaria     | stenotrophomonas maltophilia          | Bacteria | no  | no  | no  |
| bulgaria     | anoplocephaloides dentata             | Helminth | no  | no  | no  |
| bulgaria     | classical swine fever virus           | Virus    | no  | no  | no  |
| bulgaria     | crimean-congo hemorrhagic fever virus | Virus    | no  | no  | no  |
| bulgaria     | klebsiella pneumoniae                 | Bacteria | yes | yes | yes |
| bulgaria     | hepatitis b virus                     | Virus    | yes | no  | yes |
| bulgaria     | human enterovirus a                   | Virus    | yes | no  | no  |
| bulgaria     | measles virus                         | Virus    | yes | yes | yes |
| bulgaria     | streptococcus pneumoniae              | Bacteria | yes | yes | yes |
| bulgaria     | lactobacillus plantarum               | Bacteria | no  | no  | no  |
| bulgaria     | colletotrichum dematium               | Fungi    | yes | no  | no  |
| bulgaria     | lactobacillus brevis                  | Bacteria | no  | no  | no  |
| bulgaria     | dactylogyrus crivellius               | Helminth | no  | no  | no  |
| bulgaria     | dactylogyrus dyki                     | Helminth | no  | no  | no  |
| bulgaria     | rubenstremia exasperatum              | Helminth | no  | no  | no  |
| bulgaria     | trichinella spiralis                  | Helminth | yes | yes | yes |
| bulgaria     | bacillus anthracis                    | Bacteria | yes | yes | yes |
| bulgaria     | burkholderia cepacia                  | Bacteria | yes | no  | no  |
| bulgaria     | norwalk virus                         | Virus    | yes | no  | yes |
| bulgaria     | polystoma fuscus                      | Helminth | no  | no  | no  |
| bulgaria     | diplodiscus subclavatus               | Helminth | no  | no  | no  |
| bulgaria     | fusarium solani                       | Fungi    | yes | yes | yes |
| bulgaria     | serratia plymuthica                   | Bacteria | yes | no  | no  |
| bulgaria     | dactylogyrus petenyi                  | Helminth | no  | no  | no  |
| bulgaria     | brucella suis                         | Bacteria | yes | yes | no  |
| bulgaria     | neoskrjabinolepis schaldybini         | Helminth | no  | no  | no  |
| bulgaria     | polystoma combesi                     | Helminth | no  | no  | no  |
| bulgaria     | lymphocytic choriomeningitis virus    | Virus    | yes | yes | no  |
| bulgaria     | lactobacillus salivarius              | Bacteria | no  | no  | no  |
| bulgaria     | lactobacillus delbrueckii             | Bacteria | no  | no  | no  |
| bulgaria     | penicillium chrysogenum               | Fungi    | yes | no  | no  |
| bulgaria     | cephalagonimus retusus                | Helminth | no  | no  | no  |
| bulgaria     | skrjabinoeces similis                 | Helminth | no  | no  | no  |
| bulgaria     | jc polyomavirus                       | Virus    | no  | no  | no  |
| bulgaria     | gorgodera cygnoides                   | Helminth | no  | no  | no  |
| bulgaria     | newcastle disease virus               | Virus    | yes | yes | no  |
| bulgaria     | echinococcus granulosus               | Helminth | yes | yes | yes |
| bulgaria     | bk polyomavirus                       | Virus    | no  | no  | no  |
| bulgaria     | human parvovirus b19                  | Virus    | no  | no  | no  |
| burkina faso | entamoeba histolytica                 | Protozoa | yes | yes | no  |
| burkina faso | gibberella intermedia                 | Fungi    | no  | no  | no  |
| burkina faso | mycobacterium tuberculosis            | Bacteria | yes | yes | yes |
| burkina faso | measles virus                         | Virus    | yes | yes | yes |
| burkina faso | human enterovirus b                   | Virus    | yes | no  | yes |
| burkina faso | rabies virus                          | Virus    | yes | yes | yes |
| burkina faso | lumpy skin disease virus              | Virus    | no  | no  | no  |
| burkina faso | escherichia coli                      | Bacteria | yes | yes | yes |
| burkina faso | human parvovirus b19                  | Virus    | no  | no  | no  |
| burkina faso | fasciola gigantica                    | Helminth | yes | yes | no  |
| burkina faso | hepatitis c virus                     | Virus    | yes | no  | yes |

|              |                                   |          |     |     |     |
|--------------|-----------------------------------|----------|-----|-----|-----|
| burkina faso | yellow fever virus                | Virus    | yes | yes | yes |
| burkina faso | peste-des-petits-ruminants virus  | Virus    | no  | no  | no  |
| burkina faso | lactobacillus casei               | Bacteria | no  | no  | no  |
| burkina faso | foot-and-mouth disease virus      | Virus    | no  | no  | no  |
| burkina faso | newcastle disease virus           | Virus    | yes | yes | no  |
| burkina faso | neisseria meningitidis            | Bacteria | yes | no  | yes |
| burkina faso | bacillus cereus                   | Bacteria | yes | yes | no  |
| burkina faso | human enterovirus c               | Virus    | yes | no  | no  |
| burkina faso | human immunodeficiency virus 2    | Virus    | yes | no  | yes |
| burkina faso | goatpox virus                     | Virus    | no  | no  | no  |
| burkina faso | staphylococcus aureus             | Bacteria | yes | yes | yes |
| burkina faso | onchocerca volvulus               | Helminth | yes | yes | yes |
| burkina faso | plasmodium falciparum             | Protozoa | yes | no  | yes |
| burkina faso | haemonchus placei                 | Helminth | no  | no  | no  |
| burkina faso | hepatitis b virus                 | Virus    | yes | no  | yes |
| burkina faso | rift valley fever virus           | Virus    | yes | yes | yes |
| burkina faso | trypanosoma vivax                 | Protozoa | no  | no  | no  |
| burkina faso | influenza a virus                 | Virus    | yes | yes | yes |
| burkina faso | neisseria lactamica               | Bacteria | yes | no  | no  |
| burkina faso | lactobacillus plantarum           | Bacteria | no  | no  | no  |
| burkina faso | giardia intestinalis              | Protozoa | no  | no  | no  |
| burkina faso | chryseobacterium indologenes      | Bacteria | no  | no  | no  |
| burkina faso | dengue virus                      | Virus    | no  | no  | no  |
| burkina faso | human immunodeficiency virus 1    | Virus    | yes | no  | yes |
| burundi      | human immunodeficiency virus 2    | Virus    | yes | no  | yes |
| burundi      | mycobacterium bovis               | Bacteria | yes | yes | yes |
| burundi      | rabies virus                      | Virus    | yes | yes | yes |
| burundi      | newcastle disease virus           | Virus    | yes | yes | no  |
| burundi      | saccharomyces cerevisiae          | Fungi    | yes | no  | no  |
| burundi      | plasmodium falciparum             | Protozoa | yes | no  | yes |
| burundi      | hepatitis c virus                 | Virus    | yes | no  | yes |
| burundi      | african swine fever virus         | Virus    | no  | no  | no  |
| burundi      | rickettsia prowazekii             | Bacteria | yes | yes | yes |
| burundi      | foot-and-mouth disease virus      | Virus    | no  | no  | no  |
| burundi      | human immunodeficiency virus 1    | Virus    | yes | no  | yes |
| burundi      | schistosoma mansoni               | Helminth | yes | yes | yes |
| cambodia     | avian coronavirus                 | Virus    | no  | no  | no  |
| cambodia     | rabies virus                      | Virus    | yes | yes | yes |
| cambodia     | lactococcus garvieae              | Bacteria | no  | no  | no  |
| cambodia     | helicobacter pylori               | Bacteria | yes | yes | no  |
| cambodia     | human respiratory syncytial virus | Virus    | yes | no  | no  |
| cambodia     | human immunodeficiency virus 2    | Virus    | yes | no  | yes |
| cambodia     | entamoeba histolytica             | Protozoa | yes | yes | no  |
| cambodia     | influenza a virus                 | Virus    | yes | yes | yes |
| cambodia     | measles virus                     | Virus    | yes | yes | yes |
| cambodia     | mycobacterium tuberculosis        | Bacteria | yes | yes | yes |
| cambodia     | dengue virus                      | Virus    | no  | no  | no  |
| cambodia     | taenia saginata                   | Helminth | yes | yes | no  |
| cambodia     | staphylococcus epidermidis        | Bacteria | yes | yes | yes |
| cambodia     | human enterovirus b               | Virus    | yes | no  | yes |

|          |                                  |          |     |     |     |
|----------|----------------------------------|----------|-----|-----|-----|
| cambodia | seoul virus                      | Virus    | yes | yes | yes |
| cambodia | plasmodium falciparum            | Protozoa | yes | no  | yes |
| cambodia | kaeng khoi virus                 | Virus    | no  | no  | no  |
| cambodia | paecilomyces lilacinus           | Fungi    | yes | yes | no  |
| cambodia | human immunodeficiency virus 1   | Virus    | yes | no  | yes |
| cambodia | human enterovirus c              | Virus    | yes | no  | no  |
| cambodia | fusarium solani                  | Fungi    | yes | yes | yes |
| cambodia | hepatitis c virus                | Virus    | yes | no  | yes |
| cambodia | hepatitis e virus                | Virus    | yes | yes | yes |
| cambodia | nipah virus                      | Virus    | yes | yes | yes |
| cambodia | saccharomyces cerevisiae         | Fungi    | yes | no  | no  |
| cambodia | schistosoma mekongi              | Helminth | yes | yes | no  |
| cambodia | hepatitis b virus                | Virus    | yes | no  | yes |
| cambodia | human enterovirus a              | Virus    | yes | no  | no  |
| cambodia | foot-and-mouth disease virus     | Virus    | no  | no  | no  |
| cambodia | human metapneumovirus            | Virus    | no  | no  | no  |
| cambodia | opisthorchis viverrini           | Helminth | yes | yes | no  |
| cameroon | leucocytozoon macleani           | Protozoa | no  | no  | no  |
| cameroon | bk polyomavirus                  | Virus    | no  | no  | no  |
| cameroon | mammalian orthoreovirus          | Virus    | no  | no  | no  |
| cameroon | cordyceps bassiana               | Fungi    | no  | no  | no  |
| cameroon | plasmodium malariae              | Protozoa | yes | yes | no  |
| cameroon | onchocerca armillata             | Helminth | no  | no  | no  |
| cameroon | onchocerca dukei                 | Helminth | no  | no  | no  |
| cameroon | onchocerca volvulus              | Helminth | yes | yes | yes |
| cameroon | rotavirus a                      | Virus    | yes | yes | yes |
| cameroon | foot-and-mouth disease virus     | Virus    | no  | no  | no  |
| cameroon | schistosoma haematobium          | Helminth | yes | yes | no  |
| cameroon | hepatitis c virus                | Virus    | yes | no  | yes |
| cameroon | yellow fever virus               | Virus    | yes | yes | yes |
| cameroon | botryosphaeria rhodina           | Fungi    | no  | no  | no  |
| cameroon | bacillus anthracis               | Bacteria | yes | yes | yes |
| cameroon | human enterovirus c              | Virus    | yes | no  | no  |
| cameroon | rabies virus                     | Virus    | yes | yes | yes |
| cameroon | sindbis virus                    | Virus    | yes | yes | yes |
| cameroon | balantidium coli                 | Protozoa | yes | yes | no  |
| cameroon | hepatitis b virus                | Virus    | yes | no  | yes |
| cameroon | fonsecaea pedrosoi               | Fungi    | no  | no  | no  |
| cameroon | human immunodeficiency virus 1   | Virus    | yes | no  | yes |
| cameroon | enterocytozoon bienersi          | Fungi    | yes | no  | yes |
| cameroon | mycobacterium tuberculosis       | Bacteria | yes | yes | yes |
| cameroon | human immunodeficiency virus 2   | Virus    | yes | no  | yes |
| cameroon | macacine herpesvirus 5           | Virus    | no  | no  | no  |
| cameroon | rhabdias okuensis                | Helminth | no  | no  | no  |
| cameroon | human astrovirus                 | Virus    | yes | no  | yes |
| cameroon | primate t-lymphotropic virus 2   | Virus    | no  | no  | no  |
| cameroon | hepatitis delta virus            | Virus    | yes | no  | no  |
| cameroon | escherichia coli                 | Bacteria | yes | yes | yes |
| cameroon | peste-des-petits-ruminants virus | Virus    | no  | no  | no  |
| cameroon | fusarium solani                  | Fungi    | yes | yes | yes |

|          |                                |          |     |     |     |
|----------|--------------------------------|----------|-----|-----|-----|
| cameroon | primate t-lymphotropic virus 1 | Virus    | no  | no  | no  |
| cameroon | onchocerca ramachandrini       | Helminth | no  | no  | no  |
| cameroon | troglyodytella abressarti      | Protozoa | no  | no  | no  |
| cameroon | ehrlichia canis                | Bacteria | no  | no  | no  |
| cameroon | simian immunodeficiency virus  | Virus    | no  | no  | no  |
| cameroon | taenia solium                  | Helminth | yes | no  | yes |
| cameroon | mokola virus                   | Virus    | yes | yes | no  |
| cameroon | bluetongue virus               | Virus    | no  | no  | no  |
| cameroon | plasmodium ovale               | Protozoa | yes | no  | no  |
| cameroon | trypanosoma congolense         | Protozoa | no  | no  | no  |
| cameroon | trypanosoma theileri           | Protozoa | no  | no  | no  |
| cameroon | trypanosoma vivax              | Protozoa | no  | no  | no  |
| cameroon | human herpesvirus 8            | Virus    | yes | no  | yes |
| cameroon | bunyamwera virus               | Virus    | yes | yes | no  |
| cameroon | plasmodium falciparum          | Protozoa | yes | no  | yes |
| cameroon | african swine fever virus      | Virus    | no  | no  | no  |
| cameroon | vibrio cholerae                | Bacteria | yes | no  | yes |
| cameroon | streptococcus pneumoniae       | Bacteria | yes | yes | yes |
| cameroon | yarrowia lipolytica            | Fungi    | no  | no  | no  |
| cameroon | trypanosoma brucei             | Protozoa | yes | yes | yes |
| cameroon | schistosoma mansoni            | Helminth | yes | yes | yes |
| cameroon | mycoplasma mycoides            | Bacteria | no  | no  | no  |
| cameroon | onchocerca ochengi             | Helminth | no  | no  | no  |
| cameroon | primate t-lymphotropic virus 3 | Virus    | no  | no  | no  |
| cameroon | plasmodium yoelii              | Protozoa | no  | no  | no  |
| cameroon | plasmodium vinckei             | Protozoa | no  | no  | no  |
| cameroon | simian foamy virus             | Virus    | no  | no  | no  |
| cameroon | newcastle disease virus        | Virus    | yes | yes | no  |
| cameroon | measles virus                  | Virus    | yes | yes | yes |
| cameroon | trypanosoma grayi              | Protozoa | no  | no  | no  |
| cameroon | plasmodium reichenowi          | Protozoa | no  | no  | no  |
| cameroon | chlamydia trachomatis          | Bacteria | yes | yes | yes |
| cameroon | dengue virus                   | Virus    | no  | no  | no  |
| cameroon | lumpy skin disease virus       | Virus    | no  | no  | no  |
| canada   | toxoplasma gondii              | Protozoa | yes | yes | yes |
| canada   | cordyceps bassiana             | Fungi    | no  | no  | no  |
| canada   | human parechovirus             | Virus    | no  | no  | no  |
| canada   | francisella tularensis         | Bacteria | yes | yes | yes |
| canada   | mannheimia haemolytica         | Bacteria | no  | no  | no  |
| canada   | pseudomonas mosselii           | Bacteria | no  | no  | no  |
| canada   | fowl adenovirus e              | Virus    | no  | no  | no  |
| canada   | arcobacter skirrowii           | Bacteria | no  | no  | no  |
| canada   | gyrodactylus stephanus         | Helminth | no  | no  | no  |
| canada   | cryptosporidium parvum         | Protozoa | yes | yes | yes |
| canada   | human parainfluenza virus 4    | Virus    | yes | no  | no  |
| canada   | arthrographis kalrae           | Fungi    | no  | no  | no  |
| canada   | encephalitozoon intestinalis   | Fungi    | yes | no  | yes |
| canada   | human immunodeficiency virus 2 | Virus    | yes | no  | yes |
| canada   | influenza a virus              | Virus    | yes | yes | yes |
| canada   | anoplocephaloides dentata      | Helminth | no  | no  | no  |



|        |                                         |          |     |     |     |
|--------|-----------------------------------------|----------|-----|-----|-----|
| canada | severe acute respiratory syndrome-rel   | Virus    | no  | no  | no  |
| canada | yersinia aleksiciae                     | Bacteria | no  | no  | no  |
| canada | loma salmonae                           | Fungi    | no  | no  | no  |
| canada | fusarium solani                         | Fungi    | yes | yes | yes |
| canada | loma pacificodae                        | Fungi    | no  | no  | no  |
| canada | streptococcus agalactiae                | Bacteria | yes | yes | no  |
| canada | arcobacter cryaerophilus                | Bacteria | yes | yes | no  |
| canada | megalogonia ictaluri                    | Helminth | no  | no  | no  |
| canada | infectious hematopoietic necrosis virus | Virus    | no  | no  | no  |
| canada | canine distemper virus                  | Virus    | no  | no  | no  |
| canada | treponema pallidum                      | Bacteria | yes | no  | yes |
| canada | moritella viscosa                       | Bacteria | no  | no  | no  |
| canada | mammalian orthoreovirus                 | Virus    | no  | no  | no  |
| canada | human enterovirus a                     | Virus    | yes | no  | no  |
| canada | butyrivibrio hungatei                   | Bacteria | no  | no  | no  |
| canada | proteocephalus tetrastomus              | Helminth | no  | no  | no  |
| canada | gnathostoma miyazakii                   | Helminth | no  | no  | no  |
| canada | loma kenti                              | Fungi    | no  | no  | no  |
| canada | filaroides martis                       | Helminth | no  | no  | no  |
| canada | xanthomonas campestris                  | Bacteria | no  | no  | no  |
| canada | loma lingcodae                          | Fungi    | no  | no  | no  |
| canada | neospora caninum                        | Protozoa | no  | no  | no  |
| canada | loma embiotocia                         | Fungi    | no  | no  | no  |
| canada | alaria mustelae                         | Helminth | no  | no  | no  |
| canada | equine infectious anemia virus          | Virus    | no  | no  | no  |
| canada | actinobacillus pleuropneumoniae         | Bacteria | yes | yes | no  |
| canada | mycobacterium bovis                     | Bacteria | yes | yes | yes |
| canada | infectious pancreatic necrosis virus    | Virus    | no  | no  | no  |
| canada | campylobacter coli                      | Bacteria | yes | yes | no  |
| canada | fowl adenovirus b                       | Virus    | no  | no  | no  |
| canada | avian coronavirus                       | Virus    | no  | no  | no  |
| canada | hepatitis delta virus                   | Virus    | yes | no  | no  |
| canada | aquareovirus a                          | Virus    | no  | no  | no  |
| canada | fundulotrema porterensis                | Helminth | no  | no  | no  |
| canada | neospora hughesi                        | Protozoa | no  | no  | no  |
| canada | pasteurella multocida                   | Bacteria | yes | yes | no  |
| canada | gyrocerviceanseris passamaquoddyens     | Helminth | no  | no  | no  |
| canada | human enterovirus c                     | Virus    | yes | no  | no  |
| canada | trichoderma longibrachiatum             | Fungi    | no  | no  | no  |
| canada | dracunculus lutrae                      | Helminth | no  | no  | no  |
| canada | epizootic hemorrhagic disease virus     | Virus    | no  | no  | no  |
| canada | anaplasma marginale                     | Bacteria | no  | no  | no  |
| canada | botryosphaeria rhodina                  | Fungi    | no  | no  | no  |
| canada | klebsiella pneumoniae                   | Bacteria | yes | yes | yes |
| canada | nosema ceranae                          | Fungi    | no  | no  | no  |
| canada | megathylacoides giganteum               | Helminth | no  | no  | no  |
| canada | cryptosporidium hominis                 | Protozoa | yes | no  | yes |
| canada | porphyromonas levii                     | Bacteria | yes | no  | no  |
| canada | diotrophyme renale                      | Helminth | no  | no  | no  |
| canada | polylekithum ictaluri                   | Helminth | no  | no  | no  |

|        |                                        |          |     |     |     |
|--------|----------------------------------------|----------|-----|-----|-----|
| canada | saccharomyces cerevisiae               | Fungi    | yes | no  | no  |
| canada | dracunculus insignis                   | Helminth | yes | yes | no  |
| canada | aeromonas salmonicida                  | Bacteria | no  | no  | no  |
| canada | human metapneumovirus                  | Virus    | no  | no  | no  |
| canada | woodchuck hepatitis virus              | Virus    | no  | no  | no  |
| canada | penicillium brevicompactum             | Fungi    | no  | no  | no  |
| canada | rubella virus                          | Virus    | yes | no  | no  |
| canada | corallotaenia intermedia               | Helminth | no  | no  | no  |
| canada | diplostomum huronense                  | Helminth | no  | no  | no  |
| canada | mycoplasma pneumoniae                  | Bacteria | yes | no  | no  |
| canada | cryptococcus neoformans                | Fungi    | yes | yes | yes |
| canada | viral hemorrhagic septicemia virus     | Virus    | no  | no  | no  |
| canada | gyrodactylus jennyae                   | Helminth | no  | no  | no  |
| canada | vibrio parahaemolyticus                | Bacteria | yes | yes | yes |
| canada | lymphocystis disease virus 1           | Virus    | no  | no  | no  |
| canada | rotavirus a                            | Virus    | yes | yes | yes |
| canada | campylobacter lari                     | Bacteria | yes | yes | no  |
| canada | listeria monocytogenes                 | Bacteria | yes | yes | yes |
| canada | gyrodactylus notatae                   | Helminth | no  | no  | no  |
| canada | hysteromorpha triloba                  | Helminth | no  | no  | no  |
| canada | california encephalitis virus          | Virus    | yes | yes | yes |
| canada | streptococcus mutans                   | Bacteria | yes | no  | no  |
| canada | aleutian mink disease virus            | Virus    | no  | no  | no  |
| canada | human papillomavirus 16                | Virus    | no  | no  | no  |
| canada | acinetobacter ursingii                 | Bacteria | no  | no  | no  |
| canada | ichthyocotylurus pileatus              | Helminth | no  | no  | no  |
| canada | elephantid herpesvirus 1               | Virus    | no  | no  | no  |
| canada | staphylococcus aureus                  | Bacteria | yes | yes | yes |
| canada | newcastle disease virus                | Virus    | yes | yes | no  |
| canada | leptospira interrogans                 | Bacteria | yes | yes | yes |
| canada | porcine reproductive and respiratory s | Virus    | no  | no  | no  |
| canada | borrelia burgdorferi                   | Bacteria | yes | yes | yes |
| canada | equid herpesvirus 1                    | Virus    | no  | no  | no  |
| canada | west nile virus                        | Virus    | yes | yes | yes |
| canada | apharyngostrigea cornu                 | Helminth | no  | no  | no  |
| canada | candida albicans                       | Fungi    | yes | yes | yes |
| canada | nematodirus battus                     | Helminth | no  | no  | no  |
| canada | bovine leukemia virus                  | Virus    | no  | no  | no  |
| canada | neurospora cerealis                    | Fungi    | no  | no  | no  |
| canada | vesicular stomatitis new jersey virus  | Virus    | no  | no  | no  |
| canada | taenia crassiceps                      | Helminth | yes | yes | no  |
| canada | sarcocystis ovalis                     | Protozoa | no  | no  | no  |
| canada | ureaplasma urealyticum                 | Bacteria | yes | yes | no  |
| canada | sapporo virus                          | Virus    | no  | no  | no  |
| canada | staphylococcus epidermidis             | Bacteria | yes | yes | yes |
| canada | porcine epidemic diarrhea virus        | Virus    | no  | no  | no  |
| canada | malassezia furfur                      | Fungi    | yes | yes | no  |
| canada | fasciola hepatica                      | Helminth | yes | yes | no  |
| canada | measles virus                          | Virus    | yes | yes | yes |
| canada | nucleospora salmonis                   | Fungi    | no  | no  | no  |

|        |                                |          |     |     |     |
|--------|--------------------------------|----------|-----|-----|-----|
| canada | ajellomyces dermatitidis       | Fungi    | no  | no  | no  |
| canada | bordetella pertussis           | Bacteria | yes | no  | yes |
| canada | jc polyomavirus                | Virus    | no  | no  | no  |
| canada | varestrongylus alpenae         | Helminth | no  | no  | no  |
| canada | porcine type-c oncovirus       | Virus    | no  | no  | no  |
| canada | scolecobasidium humicola       | Fungi    | yes | yes | no  |
| canada | chaetomium globosum            | Fungi    | yes | no  | no  |
| canada | lactobacillus reuteri          | Bacteria | no  | no  | no  |
| canada | mycobacterium tuberculosis     | Bacteria | yes | yes | yes |
| canada | penicillium polonicum          | Fungi    | no  | no  | no  |
| canada | loma morhua                    | Fungi    | no  | no  | no  |
| canada | soboliphyme baturini           | Helminth | no  | no  | no  |
| canada | hepatitis b virus              | Virus    | yes | no  | yes |
| canada | avian orthoreovirus            | Virus    | no  | no  | no  |
| canada | proteus mirabilis              | Bacteria | yes | yes | no  |
| canada | bovine papillomavirus 1        | Virus    | no  | no  | no  |
| canada | feline immunodeficiency virus  | Virus    | no  | no  | no  |
| canada | lactobacillus rhamnosus        | Bacteria | no  | no  | no  |
| canada | clostridium botulinum          | Bacteria | yes | yes | yes |
| canada | babesia major                  | Protozoa | no  | no  | no  |
| canada | gyrodactylus emembranatus      | Helminth | no  | no  | no  |
| canada | haplobothrium globuliforme     | Helminth | no  | no  | no  |
| canada | acinetobacter baumannii        | Bacteria | yes | no  | no  |
| canada | renibacterium salmoninarum     | Bacteria | no  | no  | no  |
| canada | primate t-lymphotropic virus 1 | Virus    | no  | no  | no  |
| canada | trichoderma atroviride         | Fungi    | no  | no  | no  |
| canada | mumps virus                    | Virus    | yes | no  | no  |
| canada | diplostomum indistinctum       | Helminth | no  | no  | no  |
| canada | canarypox virus                | Virus    | no  | no  | no  |
| canada | pseudoperkinsus tapetis        | Others   | no  | no  | no  |
| canada | crepidostomum cooperi          | Helminth | no  | no  | no  |
| canada | acinetobacter parvus           | Bacteria | no  | no  | no  |
| canada | microsporidium prosopium       | Fungi    | no  | no  | no  |
| canada | aeromonas caviae               | Bacteria | yes | yes | yes |
| canada | vibrio splendidus              | Bacteria | no  | no  | no  |
| canada | orchitophrya stellarum         | Protozoa | no  | no  | no  |
| canada | tylodelphys scheuringi         | Helminth | no  | no  | no  |
| canada | phyllostomum lacustri          | Helminth | no  | no  | no  |
| canada | flavobacterium psychrophilum   | Bacteria | no  | no  | no  |
| canada | bluetongue virus               | Virus    | no  | no  | no  |
| canada | elaphostrongylus rangiferi     | Helminth | no  | no  | no  |
| canada | fundulotrema prolongis         | Helminth | no  | no  | no  |
| canada | malassezia slooffiae           | Fungi    | no  | no  | no  |
| canada | chlamydia trachomatis          | Bacteria | yes | yes | yes |
| canada | diphyllobothrium nihonkaiense  | Helminth | yes | yes | no  |
| canada | taenia serialis                | Helminth | yes | no  | no  |
| canada | streptococcus pneumoniae       | Bacteria | yes | yes | yes |
| canada | cryptosporidium ubiquitum      | Protozoa | no  | no  | no  |
| canada | infectious salmon anemia virus | Virus    | no  | no  | no  |
| canada | corallotaenia minutia          | Helminth | no  | no  | no  |

|        |                                   |          |     |     |     |
|--------|-----------------------------------|----------|-----|-----|-----|
| canada | giardia intestinalis              | Protozoa | no  | no  | no  |
| canada | arthroderma grubyi                | Fungi    | no  | no  | no  |
| canada | human respiratory syncytial virus | Virus    | yes | no  | no  |
| canada | legionella pneumophila            | Bacteria | yes | no  | yes |
| canada | escherichia fergusonii            | Bacteria | no  | no  | no  |
| canada | human adenovirus d                | Virus    | yes | no  | no  |
| canada | parelaphostrongylus andersoni     | Helminth | no  | no  | no  |
| canada | salmonella enterica               | Bacteria | no  | no  | no  |
| canada | paracryptotrematina limi          | Helminth | no  | no  | no  |
| canada | fusarium oxysporum                | Fungi    | yes | no  | yes |
| canada | chlamydomyces pneumoniae          | Bacteria | yes | yes | no  |
| canada | aspergillus ustus                 | Fungi    | no  | no  | no  |
| canada | burkholderia cepacia              | Bacteria | yes | no  | no  |
| canada | bacillus cereus                   | Bacteria | yes | yes | no  |
| canada | bovine immunodeficiency virus     | Virus    | no  | no  | no  |
| canada | umingmakstrongylus pallikuukensis | Helminth | no  | no  | no  |
| canada | pseudomonas putida                | Bacteria | yes | no  | no  |
| canada | human adenovirus b                | Virus    | yes | no  | no  |
| canada | human parvovirus b19              | Virus    | no  | no  | no  |
| canada | phocascaris cystophorae           | Helminth | no  | no  | no  |
| canada | fundulotrema foxi                 | Helminth | no  | no  | no  |
| canada | bacillus anthracis                | Bacteria | yes | yes | yes |
| canada | loma wallae                       | Fungi    | no  | no  | no  |
| canada | human immunodeficiency virus 1    | Virus    | yes | no  | yes |
| canada | fowl adenovirus d                 | Virus    | no  | no  | no  |
| canada | norwalk virus                     | Virus    | yes | no  | yes |
| canada | torque teno sus virus 1           | Virus    | no  | no  | no  |
| canada | trypanosoma rotatorium            | Protozoa | no  | no  | no  |
| canada | fascioloides magna                | Helminth | no  | no  | no  |
| canada | haemophilus influenzae            | Bacteria | yes | no  | yes |
| canada | rabies virus                      | Virus    | yes | yes | yes |
| canada | mycobacterium avium               | Bacteria | yes | yes | yes |
| canada | diplostomum baeri                 | Helminth | no  | no  | no  |
| canada | bacillus tequilensis              | Bacteria | no  | no  | no  |
| canada | bacillus licheniformis            | Bacteria | yes | yes | no  |
| canada | pneumocystis carinii              | Fungi    | yes | yes | yes |
| canada | yersinia enterocolitica           | Bacteria | yes | yes | yes |
| canada | plasmodium falciparum             | Protozoa | yes | no  | yes |
| canada | ureaplasma diversum               | Bacteria | no  | no  | no  |
| canada | corallobothrium parafimbriatum    | Helminth | no  | no  | no  |
| canada | vaccinia virus                    | Virus    | no  | no  | no  |
| canada | echinococcus granulosus           | Helminth | yes | yes | yes |
| canada | shewanella putrefaciens           | Bacteria | no  | no  | no  |
| canada | proteocephalus perplexus          | Helminth | no  | no  | no  |
| canada | mycoplasma hyopneumoniae          | Bacteria | no  | no  | no  |
| canada | bovine viral diarrhea virus 1     | Virus    | no  | no  | no  |
| canada | bacillus thuringiensis            | Bacteria | yes | no  | no  |
| canada | schizorchis caballeroi            | Helminth | no  | no  | no  |
| canada | human enterovirus b               | Virus    | yes | no  | yes |
| canada | muellerius capillaris             | Helminth | no  | no  | no  |

|        |                               |          |     |     |     |
|--------|-------------------------------|----------|-----|-----|-----|
| canada | neisseria meningitidis        | Bacteria | yes | no  | yes |
| canada | actinobaculum schaalii        | Bacteria | no  | no  | no  |
| canada | leporid herpesvirus 4         | Virus    | no  | no  | no  |
| canada | aspergillus niger             | Fungi    | yes | yes | no  |
| canada | malassezia globosa            | Fungi    | yes | yes | no  |
| canada | human adenovirus a            | Virus    | yes | no  | no  |
| canada | fowl adenovirus a             | Virus    | no  | no  | no  |
| canada | campylobacter jejuni          | Bacteria | yes | yes | yes |
| canada | ruminococcus flavefaciens     | Bacteria | no  | no  | no  |
| canada | cryptococcus gattii           | Fungi    | no  | no  | no  |
| canada | hepatitis e virus             | Virus    | yes | yes | yes |
| canada | centrocestus formosanus       | Helminth | yes | yes | no  |
| canada | serratia marcescens           | Bacteria | yes | yes | yes |
| canada | histophilus somni             | Bacteria | no  | no  | no  |
| canada | arthrobacter creatinolyticus  | Bacteria | no  | no  | no  |
| canada | streptococcus dysgalactiae    | Bacteria | no  | no  | no  |
| canada | human herpesvirus 4           | Virus    | no  | no  | no  |
| canada | influenza b virus             | Virus    | yes | yes | no  |
| canada | enterococcus faecium          | Bacteria | yes | yes | yes |
| canada | powassan virus                | Virus    | yes | yes | no  |
| canada | corynebacterium propinquum    | Bacteria | yes | no  | no  |
| canada | janthinobacterium lividum     | Bacteria | no  | no  | no  |
| canada | trichobilharzia querquedulae  | Helminth | no  | no  | no  |
| canada | human parainfluenza virus 3   | Virus    | yes | no  | no  |
| canada | pseudomonas fluorescens       | Bacteria | yes | no  | no  |
| canada | malassezia restricta          | Fungi    | yes | yes | no  |
| canada | entobdella stenolepis         | Helminth | no  | no  | no  |
| canada | helicobacter pylori           | Bacteria | yes | yes | no  |
| canada | ovine herpesvirus 2           | Virus    | no  | no  | no  |
| canada | bunyamwera virus              | Virus    | yes | yes | no  |
| canada | clostridium perfringens       | Bacteria | yes | yes | no  |
| canada | st. louis encephalitis virus  | Virus    | yes | yes | yes |
| canada | cryptosporidium andersoni     | Protozoa | no  | no  | no  |
| canada | bovine herpesvirus 1          | Virus    | no  | no  | no  |
| canada | pseudoterranova bulbosa       | Helminth | no  | no  | no  |
| canada | hepatitis c virus             | Virus    | yes | no  | yes |
| canada | bacillus subtilis             | Bacteria | yes | yes | no  |
| canada | trichobilharzia brantae       | Helminth | no  | no  | no  |
| canada | clonorchis sinensis           | Helminth | yes | no  | no  |
| canada | corynebacterium macginleyi    | Bacteria | yes | no  | no  |
| canada | bacillus pumilus              | Bacteria | yes | no  | no  |
| canada | ambystoma tigrinum virus      | Virus    | no  | no  | no  |
| canada | duck adenovirus a             | Virus    | no  | no  | no  |
| canada | pseudomonas aeruginosa        | Bacteria | yes | yes | yes |
| canada | chrysosporium synchronum      | Fungi    | no  | no  | no  |
| canada | fowl adenovirus c             | Virus    | no  | no  | no  |
| canada | heligmosomoides polygyrus     | Helminth | no  | no  | no  |
| canada | parelaphostrongylus odocoilei | Helminth | no  | no  | no  |
| canada | echinococcus canadensis       | Helminth | no  | no  | no  |
| canada | pseudoterranova decipiens     | Helminth | yes | no  | no  |

|                      |                                      |          |     |     |     |
|----------------------|--------------------------------------|----------|-----|-----|-----|
| canada               | corynebacterium pseudodiphtheriticur | Bacteria | no  | no  | no  |
| canada               | anisakis ziphidarum                  | Helminth | no  | no  | no  |
| canada               | aeromonas hydrophila                 | Bacteria | yes | yes | yes |
| canada               | clostridium difficile                | Bacteria | yes | yes | yes |
| canada               | torque teno sus virus 2              | Virus    | no  | no  | no  |
| canada               | escherichia coli                     | Bacteria | yes | yes | yes |
| canada               | serratia proteamaculans              | Bacteria | yes | no  | no  |
| canada               | microbacterium oxydans               | Bacteria | no  | no  | no  |
| canada               | rhodococcus equi                     | Bacteria | yes | yes | no  |
| canada               | streptococcus pyogenes               | Bacteria | yes | yes | yes |
| canada               | clinostomum marginatum               | Helminth | no  | no  | no  |
| canada               | piscirickettsia salmonis             | Bacteria | no  | no  | no  |
| canada               | colletotrichum truncatum             | Fungi    | no  | no  | no  |
| canada               | porcine parvovirus                   | Virus    | no  | no  | no  |
| canada               | sarcocystis alceslatrans             | Protozoa | no  | no  | no  |
| canada               | malassezia sympodialis               | Fungi    | yes | yes | no  |
| canada               | streptococcus suis                   | Bacteria | yes | yes | no  |
| canada               | ignatzschineria indica               | Bacteria | no  | no  | no  |
| canada               | angiostrongylus vasorum              | Helminth | no  | no  | no  |
| canada               | hepatitis a virus                    | Virus    | yes | yes | yes |
| canada               | mycoplasma fermentans                | Bacteria | yes | yes | no  |
| canada               | campylobacter fetus                  | Bacteria | yes | yes | yes |
| canada               | neisseria gonorrhoeae                | Bacteria | yes | no  | yes |
| canada               | paranoplocephala primordialis        | Helminth | no  | no  | no  |
| canada               | coxiella burnetii                    | Bacteria | yes | yes | no  |
| cape verde           | human immunodeficiency virus 2       | Virus    | yes | no  | yes |
| cape verde           | african swine fever virus            | Virus    | no  | no  | no  |
| cape verde           | human immunodeficiency virus 1       | Virus    | yes | no  | yes |
| cape verde           | haemonchus placei                    | Helminth | no  | no  | no  |
| cape verde           | fasciola gigantica                   | Helminth | yes | yes | no  |
| cape verde           | babesia canis                        | Protozoa | no  | no  | no  |
| cape verde           | plasmodium falciparum                | Protozoa | yes | no  | yes |
| cape verde           | taenia solium                        | Helminth | yes | no  | yes |
| cape verde           | anaplasma platys                     | Bacteria | no  | no  | no  |
| cape verde           | hepatozoon canis                     | Protozoa | no  | no  | no  |
| cape verde           | fusarium solani                      | Fungi    | yes | yes | yes |
| cape verde           | ehrlichia canis                      | Bacteria | no  | no  | no  |
| cayman islands       | chelonid herpesvirus 6               | Virus    | no  | no  | no  |
| central african repl | manzanilla virus                     | Virus    | no  | no  | no  |
| central african repl | measles virus                        | Virus    | yes | yes | yes |
| central african repl | plasmodium vinckei                   | Protozoa | no  | no  | no  |
| central african repl | hepatitis c virus                    | Virus    | yes | no  | yes |
| central african repl | mokola virus                         | Virus    | yes | yes | no  |
| central african repl | human immunodeficiency virus 1       | Virus    | yes | no  | yes |
| central african repl | human astrovirus                     | Virus    | yes | no  | yes |
| central african repl | jc polyomavirus                      | Virus    | no  | no  | no  |
| central african repl | rabies virus                         | Virus    | yes | yes | yes |
| central african repl | hepatitis e virus                    | Virus    | yes | yes | yes |
| central african repl | primate t-lymphotropic virus 1       | Virus    | no  | no  | no  |
| central african repl | pieidia quintanilhae                 | Fungi    | no  | no  | no  |

|                      |                                  |          |     |     |     |
|----------------------|----------------------------------|----------|-----|-----|-----|
| central african repl | plasmodium yoelii                | Protozoa | no  | no  | no  |
| central african repl | streptococcus pneumoniae         | Bacteria | yes | yes | yes |
| central african repl | neisseria gonorrhoeae            | Bacteria | yes | no  | yes |
| central african repl | human immunodeficiency virus 2   | Virus    | yes | no  | yes |
| central african repl | bagaza virus                     | Virus    | yes | yes | yes |
| central african repl | lagos bat virus                  | Virus    | no  | no  | no  |
| central african repl | rift valley fever virus          | Virus    | yes | yes | yes |
| central african repl | mycobacterium tuberculosis       | Bacteria | yes | yes | yes |
| central african repl | plasmodium falciparum            | Protozoa | yes | no  | yes |
| central african repl | human enterovirus c              | Virus    | yes | no  | no  |
| central african repl | hepatitis delta virus            | Virus    | yes | no  | no  |
| central african repl | human herpesvirus 8              | Virus    | yes | no  | yes |
| central african repl | yellow fever virus               | Virus    | yes | yes | yes |
| central african repl | hepatitis b virus                | Virus    | yes | no  | yes |
| central african repl | escherichia coli                 | Bacteria | yes | yes | yes |
| central african repl | bunyamwera virus                 | Virus    | yes | yes | no  |
| central african repl | bk polyomavirus                  | Virus    | no  | no  | no  |
| central african repl | peste-des-petits-ruminants virus | Virus    | no  | no  | no  |
| central african repl | chlamydomydia pneumoniae         | Bacteria | yes | yes | no  |
| central african repl | west nile virus                  | Virus    | yes | yes | yes |
| chad                 | goatpox virus                    | Virus    | no  | no  | no  |
| chad                 | human immunodeficiency virus 1   | Virus    | yes | no  | yes |
| chad                 | neisseria meningitidis           | Bacteria | yes | no  | yes |
| chad                 | mycobacterium tuberculosis       | Bacteria | yes | yes | yes |
| chad                 | clostridium botulinum            | Bacteria | yes | yes | yes |
| chad                 | hepatitis e virus                | Virus    | yes | yes | yes |
| chad                 | rabies virus                     | Virus    | yes | yes | yes |
| chad                 | rift valley fever virus          | Virus    | yes | yes | yes |
| chad                 | human enterovirus c              | Virus    | yes | no  | no  |
| chad                 | plasmodium falciparum            | Protozoa | yes | no  | yes |
| chile                | francisella noatunensis          | Bacteria | no  | no  | no  |
| chile                | human immunodeficiency virus 2   | Virus    | yes | no  | yes |
| chile                | cryptococcus neoformans          | Fungi    | yes | yes | yes |
| chile                | cystoisospora belli              | Protozoa | yes | yes | yes |
| chile                | neisseria meningitidis           | Bacteria | yes | no  | yes |
| chile                | dengue virus                     | Virus    | no  | no  | no  |
| chile                | torque teno sus virus 1          | Virus    | no  | no  | no  |
| chile                | rabies virus                     | Virus    | yes | yes | yes |
| chile                | salmonella enterica              | Bacteria | no  | no  | no  |
| chile                | helicobacter pylori              | Bacteria | yes | yes | no  |
| chile                | streptococcus pneumoniae         | Bacteria | yes | yes | yes |
| chile                | bartonella rochalimae            | Bacteria | no  | no  | no  |
| chile                | escherichia coli                 | Bacteria | yes | yes | yes |
| chile                | citrobacter gillenii             | Bacteria | no  | no  | no  |
| chile                | rickettsia felis                 | Bacteria | yes | yes | no  |
| chile                | bacillus coagulans               | Bacteria | yes | yes | no  |
| chile                | vibrio pomeroiyi                 | Bacteria | no  | no  | no  |
| chile                | trypanosoma cruzi                | Protozoa | yes | yes | yes |
| chile                | cryptosporidium muris            | Protozoa | no  | no  | no  |
| chile                | lactococcus lactis               | Bacteria | no  | no  | no  |

|       |                                      |          |     |     |     |
|-------|--------------------------------------|----------|-----|-----|-----|
| chile | kluyvera intermedia                  | Bacteria | no  | no  | no  |
| chile | fusarium oxysporum                   | Fungi    | yes | no  | yes |
| chile | piscirickettsia salmonis             | Bacteria | no  | no  | no  |
| chile | alcelaphine herpesvirus 1            | Virus    | no  | no  | no  |
| chile | cryptosporidium parvum               | Protozoa | yes | yes | yes |
| chile | corynebacterium pseudotuberculosis   | Bacteria | yes | yes | no  |
| chile | yersinia ruckeri                     | Bacteria | yes | yes | no  |
| chile | agrobacterium tumefaciens            | Bacteria | no  | no  | no  |
| chile | schizophyllum commune                | Fungi    | yes | no  | no  |
| chile | hepatitis a virus                    | Virus    | yes | yes | yes |
| chile | toxoplasma gondii                    | Protozoa | yes | yes | yes |
| chile | bartonella henselae                  | Bacteria | yes | yes | no  |
| chile | loma salmonae                        | Fungi    | no  | no  | no  |
| chile | interniloculus chilensis             | Helminth | no  | no  | no  |
| chile | nucleospora salmonis                 | Fungi    | no  | no  | no  |
| chile | infectious pancreatic necrosis virus | Virus    | no  | no  | no  |
| chile | vibrio parahaemolyticus              | Bacteria | yes | yes | yes |
| chile | listonella anguillarum               | Bacteria | no  | no  | no  |
| chile | bovine viral diarrhea virus 2        | Virus    | no  | no  | no  |
| chile | hepatitis c virus                    | Virus    | yes | no  | yes |
| chile | acinetobacter baumannii              | Bacteria | yes | no  | no  |
| chile | torque teno canis virus              | Virus    | no  | no  | no  |
| chile | torque teno sus virus 2              | Virus    | no  | no  | no  |
| chile | fusarium incarnatum                  | Fungi    | yes | no  | no  |
| chile | brucella abortus                     | Bacteria | yes | yes | no  |
| chile | enterobius vermicularis              | Helminth | yes | yes | no  |
| chile | stenotrophomonas maltophilia         | Bacteria | no  | no  | no  |
| chile | diphyllobothrium latum               | Helminth | yes | yes | no  |
| chile | psychrobacter celer                  | Bacteria | no  | no  | no  |
| chile | staphylococcus aureus                | Bacteria | yes | yes | yes |
| chile | rhodococcus qingshengii              | Bacteria | no  | no  | no  |
| chile | enterococcus faecalis                | Bacteria | yes | yes | yes |
| chile | hepatitis b virus                    | Virus    | yes | no  | yes |
| chile | bovine leukemia virus                | Virus    | no  | no  | no  |
| chile | vibrio ordalii                       | Bacteria | no  | no  | no  |
| chile | newcastle disease virus              | Virus    | yes | yes | no  |
| chile | lactococcus garvieae                 | Bacteria | no  | no  | no  |
| chile | psychrobacter arcticus               | Bacteria | no  | no  | no  |
| chile | alternaria alternata                 | Fungi    | yes | yes | no  |
| chile | flavobacterium psychrophilum         | Bacteria | no  | no  | no  |
| chile | woodchuck hepatitis virus            | Virus    | no  | no  | no  |
| chile | mycobacterium avium                  | Bacteria | yes | yes | yes |
| chile | streptococcus pyogenes               | Bacteria | yes | yes | yes |
| chile | human immunodeficiency virus 1       | Virus    | yes | no  | yes |
| chile | microbacterium oxydans               | Bacteria | no  | no  | no  |
| chile | bovine viral diarrhea virus 1        | Virus    | no  | no  | no  |
| chile | andes virus                          | Virus    | yes | yes | yes |
| chile | cryptosporidium hominis              | Protozoa | yes | no  | yes |
| chile | diphyllobothrium pacificum           | Helminth | yes | yes | no  |
| chile | vibrio harveyi                       | Bacteria | no  | no  | no  |



|       |                                   |          |     |     |     |
|-------|-----------------------------------|----------|-----|-----|-----|
| chile | aeromonas salmonicida             | Bacteria | no  | no  | no  |
| chile | influenza a virus                 | Virus    | yes | yes | yes |
| chile | vibrio campbellii                 | Bacteria | no  | no  | no  |
| chile | measles virus                     | Virus    | yes | yes | yes |
| chile | haemophilus influenzae            | Bacteria | yes | no  | yes |
| chile | infectious salmon anemia virus    | Virus    | no  | no  | no  |
| chile | campylobacter jejuni              | Bacteria | yes | yes | yes |
| chile | rhodococcus erythropolis          | Bacteria | yes | no  | no  |
| chile | cryptosporidium meleagridis       | Protozoa | no  | no  | no  |
| chile | echinococcus granulosus           | Helminth | yes | yes | yes |
| chile | primate t-lymphotropic virus 1    | Virus    | no  | no  | no  |
| china | rabies virus                      | Virus    | yes | yes | yes |
| china | leptospira borgpetersenii         | Bacteria | yes | yes | no  |
| china | mycobacterium bovis               | Bacteria | yes | yes | yes |
| china | cryptosporidium xiaoi             | Protozoa | no  | no  | no  |
| china | lymphocystis disease virus 1      | Virus    | no  | no  | no  |
| china | lactobacillus reuteri             | Bacteria | no  | no  | no  |
| china | leptospira weilii                 | Bacteria | yes | yes | no  |
| china | actinobacillus pleuropneumoniae   | Bacteria | yes | yes | no  |
| china | trypanosoma cruzi                 | Protozoa | yes | yes | yes |
| china | vibrio communis                   | Bacteria | no  | no  | no  |
| china | dengue virus                      | Virus    | no  | no  | no  |
| china | morganella morganii               | Bacteria | yes | yes | no  |
| china | vibrio vulnificus                 | Bacteria | yes | yes | yes |
| china | streptococcus pneumoniae          | Bacteria | yes | yes | yes |
| china | eastern equine encephalitis virus | Virus    | yes | yes | yes |
| china | bacillus mojavensis               | Bacteria | no  | no  | no  |
| china | thermoascus crustaceus            | Fungi    | no  | no  | no  |
| china | babesia major                     | Protozoa | no  | no  | no  |
| china | human respiratory syncytial virus | Virus    | yes | no  | no  |
| china | angiostrongylus cantonensis       | Helminth | yes | no  | no  |
| china | human adenovirus c                | Virus    | yes | no  | no  |
| china | weissella cibaria                 | Bacteria | no  | no  | no  |
| china | penicillium polonicum             | Fungi    | no  | no  | no  |
| china | theileria annulata                | Protozoa | no  | no  | no  |
| china | pseudomonas fragi                 | Bacteria | no  | no  | no  |
| china | scedosporium apiospermum          | Fungi    | no  | no  | no  |
| china | cyclospora cayetanensis           | Protozoa | yes | yes | yes |
| china | cronobacter turicensis            | Bacteria | no  | no  | no  |
| china | candida parapsilosis              | Fungi    | yes | yes | no  |
| china | enterobacter hormaechei           | Bacteria | yes | yes | no  |
| china | ehrlichia canis                   | Bacteria | no  | no  | no  |
| china | campylobacter jejuni              | Bacteria | yes | yes | yes |
| china | cryptosporidium wrairi            | Protozoa | no  | no  | no  |
| china | trichosporon dermatis             | Fungi    | no  | no  | no  |
| china | ancyrocephalus mogurndae          | Helminth | no  | no  | no  |
| china | trichosporon coremiiforme         | Fungi    | no  | no  | no  |
| china | theileria luwenshuni              | Protozoa | no  | no  | no  |
| china | vibrio fluvialis                  | Bacteria | yes | yes | no  |
| china | ehrlichia chaffeensis             | Bacteria | yes | yes | yes |

|       |                                   |          |     |     |     |
|-------|-----------------------------------|----------|-----|-----|-----|
| china | variovorax paradoxus              | Bacteria | no  | no  | no  |
| china | citrobacter freundii              | Bacteria | yes | yes | no  |
| china | leptospira interrogans            | Bacteria | yes | yes | yes |
| china | lactobacillus casei               | Bacteria | no  | no  | no  |
| china | leishmania infantum               | Protozoa | yes | yes | yes |
| china | streptococcus agalactiae          | Bacteria | yes | yes | no  |
| china | leishmania donovani               | Protozoa | yes | yes | yes |
| china | lactococcus garvieae              | Bacteria | no  | no  | no  |
| china | enterobacter ludwigii             | Bacteria | no  | no  | no  |
| china | heteronchocleidus buschkieli      | Helminth | no  | no  | no  |
| china | brevibacillus agri                | Bacteria | no  | no  | no  |
| china | human enterovirus b               | Virus    | yes | no  | yes |
| china | brachybacterium paraconglomeratum | Bacteria | no  | no  | no  |
| china | lactobacillus acidophilus         | Bacteria | no  | no  | no  |
| china | vibrio fortis                     | Bacteria | no  | no  | no  |
| china | pasteurella multocida             | Bacteria | yes | yes | no  |
| china | leclercia adecarboxylata          | Bacteria | no  | no  | no  |
| china | dirofilaria immitis               | Helminth | yes | yes | no  |
| china | listonella anguillarum            | Bacteria | no  | no  | no  |
| china | staphylococcus cohnii             | Bacteria | no  | no  | no  |
| china | citrobacter sedlakii              | Bacteria | yes | yes | no  |
| china | infectious bursal disease virus   | Virus    | no  | no  | no  |
| china | encephalomyocarditis virus        | Virus    | yes | yes | no  |
| china | lysini bacillus fusiformis        | Bacteria | no  | no  | no  |
| china | vibrio shilonii                   | Bacteria | no  | no  | no  |
| china | mumps virus                       | Virus    | yes | no  | no  |
| china | ascaris suum                      | Helminth | yes | yes | no  |
| china | avian paramyxovirus 2             | Virus    | no  | no  | no  |
| china | mycoplasma pneumoniae             | Bacteria | yes | no  | no  |
| china | fusarium incarnatum               | Fungi    | yes | no  | no  |
| china | encephalitozoon hellem            | Fungi    | yes | no  | yes |
| china | echinococcus granulosus           | Helminth | yes | yes | yes |
| china | trypanosoma equiperdum            | Protozoa | no  | no  | no  |
| china | shigella boydii                   | Bacteria | yes | yes | no  |
| china | bartonella elizabethae            | Bacteria | yes | yes | no  |
| china | riemerella anatipestifer          | Bacteria | no  | no  | no  |
| china | streptococcus equi                | Bacteria | yes | yes | no  |
| china | human herpesvirus 6               | Virus    | yes | no  | no  |
| china | staphylococcus xylosum            | Bacteria | no  | no  | no  |
| china | human adenovirus b                | Virus    | yes | no  | no  |
| china | clavospora lusitanae              | Fungi    | no  | no  | no  |
| china | mycobacterium leprae              | Bacteria | yes | yes | yes |
| china | mazocraeoides gonialosae          | Helminth | no  | no  | no  |
| china | cryptosporidium baileyi           | Protozoa | no  | no  | no  |
| china | eimeria mitis                     | Protozoa | no  | no  | no  |
| china | psychrobacter psychrophilus       | Bacteria | no  | no  | no  |
| china | paracoccus yeei                   | Bacteria | no  | no  | no  |
| china | porcine type-c oncovirus          | Virus    | no  | no  | no  |
| china | aeromonas salmonicida             | Bacteria | no  | no  | no  |
| china | clonorchis sinensis               | Helminth | yes | no  | no  |

|       |                                |          |     |     |     |
|-------|--------------------------------|----------|-----|-----|-----|
| china | aspidogaster chongqingensis    | Helminth | no  | no  | no  |
| china | enterobacter aerogenes         | Bacteria | yes | yes | no  |
| china | bartonella clarridgeiae        | Bacteria | no  | no  | no  |
| china | clavinema parasiluri           | Helminth | no  | no  | no  |
| china | enterococcus faecalis          | Bacteria | yes | yes | yes |
| china | lactococcus raffinolactis      | Bacteria | no  | no  | no  |
| china | eimeria necatrix               | Protozoa | no  | no  | no  |
| china | lactobacillus fermentum        | Bacteria | no  | no  | no  |
| china | bacillus thuringiensis         | Bacteria | yes | no  | no  |
| china | bacillus altitudinis           | Bacteria | no  | no  | no  |
| china | weissella paramesenteroides    | Bacteria | no  | no  | no  |
| china | penicillium raistrickii        | Fungi    | no  | no  | no  |
| china | mycobacterium kansasii         | Bacteria | yes | yes | no  |
| china | human herpesvirus 5            | Virus    | yes | no  | yes |
| china | norwalk virus                  | Virus    | yes | no  | yes |
| china | sheeppox virus                 | Virus    | no  | no  | no  |
| china | listeria seeligeri             | Bacteria | yes | yes | no  |
| china | borrelia burgdorferi           | Bacteria | yes | yes | yes |
| china | lactobacillus gasseri          | Bacteria | no  | no  | no  |
| china | paecilomyces lilacinus         | Fungi    | yes | yes | no  |
| china | neisseria meningitidis         | Bacteria | yes | no  | yes |
| china | rhodotorula minuta             | Fungi    | yes | no  | no  |
| china | arthroderma vanbreuseghemii    | Fungi    | no  | no  | no  |
| china | parabronema skrjabini          | Helminth | no  | no  | no  |
| china | heterakis gallinarum           | Helminth | no  | no  | no  |
| china | sarcocystis sinensis           | Protozoa | no  | no  | no  |
| china | sphingomonas melonis           | Bacteria | no  | no  | no  |
| china | irkut virus                    | Virus    | no  | no  | no  |
| china | cochliobolus spicifer          | Fungi    | no  | no  | no  |
| china | canine adenovirus              | Virus    | no  | no  | no  |
| china | cryptosporidium felis          | Protozoa | no  | no  | no  |
| china | lecithodendrium linstowi       | Helminth | no  | no  | no  |
| china | torque teno sus virus 1        | Virus    | no  | no  | no  |
| china | vibrio tapetis                 | Bacteria | no  | no  | no  |
| china | necator americanus             | Helminth | yes | yes | no  |
| china | toxoplasma gondii              | Protozoa | yes | yes | yes |
| china | lactobacillus mucosae          | Bacteria | no  | no  | no  |
| china | pseudomonas plecoglossicida    | Bacteria | no  | no  | no  |
| china | vibrio alginolyticus           | Bacteria | yes | yes | no  |
| china | beak and feather disease virus | Virus    | no  | no  | no  |
| china | streptococcus iniae            | Bacteria | no  | no  | no  |
| china | gyrodactylus brachymystacis    | Helminth | no  | no  | no  |
| china | cyprinid herpesvirus 2         | Virus    | no  | no  | no  |
| china | human papillomavirus 53        | Virus    | no  | no  | no  |
| china | bartonella bovis               | Bacteria | no  | no  | no  |
| china | feline calicivirus             | Virus    | no  | no  | no  |
| china | cupriavidus basilensis         | Bacteria | no  | no  | no  |
| china | aspergillus tubingensis        | Fungi    | no  | no  | no  |
| china | human parvovirus b19           | Virus    | no  | no  | no  |
| china | vibrio proteolyticus           | Bacteria | no  | no  | no  |

|       |                                             |          |     |     |     |
|-------|---------------------------------------------|----------|-----|-----|-----|
| china | <i>cronobacter sakazakii</i>                | Bacteria | no  | no  | no  |
| china | <i>actinomucor elegans</i>                  | Fungi    | no  | no  | no  |
| china | <i>mycoplasma hyorhinis</i>                 | Bacteria | no  | no  | no  |
| china | <i>anguillicoloides crassus</i>             | Helminth | no  | no  | no  |
| china | <i>procamallanus fulvidraconis</i>          | Helminth | no  | no  | no  |
| china | <i>nocardia cyriacigeorgica</i>             | Bacteria | no  | no  | no  |
| china | <i>campylobacter fetus</i>                  | Bacteria | yes | yes | yes |
| china | <i>enterobacter asburiae</i>                | Bacteria | yes | yes | no  |
| china | <i>xanthomonas campestris</i>               | Bacteria | no  | no  | no  |
| china | <i>acinetobacter baumannii</i>              | Bacteria | yes | no  | no  |
| china | west Nile virus                             | Virus    | yes | yes | yes |
| china | <i>toxocara canis</i>                       | Helminth | yes | yes | no  |
| china | <i>pseudozyma hubeiensis</i>                | Fungi    | no  | no  | no  |
| china | <i>corynebacterium afermentans</i>          | Bacteria | yes | no  | no  |
| china | avian paramyxovirus 4                       | Virus    | no  | no  | no  |
| china | <i>pseudomonas mosselii</i>                 | Bacteria | no  | no  | no  |
| china | <i>mycobacterium ulcerans</i>               | Bacteria | yes | yes | yes |
| china | <i>dactylogyrus kikuchii</i>                | Helminth | no  | no  | no  |
| china | <i>vittaforma corneae</i>                   | Fungi    | yes | no  | no  |
| china | <i>thermomyces lanuginosus</i>              | Fungi    | yes | no  | no  |
| china | Newcastle disease virus                     | Virus    | yes | yes | no  |
| china | <i>enterobacter cloacae</i>                 | Bacteria | yes | yes | no  |
| china | <i>Bacillus subtilis</i>                    | Bacteria | yes | yes | no  |
| china | duck adenovirus A                           | Virus    | no  | no  | no  |
| china | <i>Oesophagostomum quadrispinulatum</i>     | Helminth | no  | no  | no  |
| china | <i>Aeromonas allosaccharophila</i>          | Bacteria | no  | no  | no  |
| china | simian foamy virus                          | Virus    | no  | no  | no  |
| china | <i>Vibrio harveyi</i>                       | Bacteria | no  | no  | no  |
| china | <i>Bacillus tequilensis</i>                 | Bacteria | no  | no  | no  |
| china | <i>Aspidogaster ijimai</i>                  | Helminth | no  | no  | no  |
| china | <i>Enterococcus gallinarum</i>              | Bacteria | yes | no  | no  |
| china | <i>Cryptosporidium meleagridis</i>          | Protozoa | no  | no  | no  |
| china | <i>Plasmodium falciparum</i>                | Protozoa | yes | no  | yes |
| china | <i>Yersinia pestis</i>                      | Bacteria | yes | yes | yes |
| china | infectious spleen and kidney necrosis virus | Virus    | no  | no  | no  |
| china | <i>Candida membranifaciens</i>              | Fungi    | no  | no  | no  |
| china | <i>Agrobacterium tumefaciens</i>            | Bacteria | no  | no  | no  |
| china | <i>Escherichia coli</i>                     | Bacteria | yes | yes | yes |
| china | <i>Pediococcus acidilactici</i>             | Bacteria | no  | no  | no  |
| china | <i>Shewanella algae</i>                     | Bacteria | no  | no  | no  |
| china | <i>Myroides odoratimimus</i>                | Bacteria | no  | no  | no  |
| china | <i>Alternaria alternata</i>                 | Fungi    | yes | yes | no  |
| china | <i>Clostridium botulinum</i>                | Bacteria | yes | yes | yes |
| china | <i>Staphylococcus hyicus</i>                | Bacteria | yes | yes | no  |
| china | <i>Cryptosporidium muris</i>                | Protozoa | no  | no  | no  |
| china | <i>Borrelia valaisiana</i>                  | Bacteria | no  | no  | no  |
| china | <i>Eimeria acervulina</i>                   | Protozoa | no  | no  | no  |
| china | suid herpesvirus 1                          | Virus    | no  | no  | no  |
| china | <i>Streptococcus pyogenes</i>               | Bacteria | yes | yes | yes |
| china | bovine herpesvirus 1                        | Virus    | no  | no  | no  |

|       |                                  |          |     |     |     |
|-------|----------------------------------|----------|-----|-----|-----|
| china | penicillium commune              | Fungi    | yes | no  | no  |
| china | rabbit hemorrhagic disease virus | Virus    | no  | no  | no  |
| china | ross river virus                 | Virus    | yes | yes | yes |
| china | human astrovirus                 | Virus    | yes | no  | yes |
| china | trichuris trichiura              | Helminth | yes | yes | no  |
| china | penicillium corylophilum         | Fungi    | no  | no  | no  |
| china | vibrio splendidus                | Bacteria | no  | no  | no  |
| china | chlamydophila psittaci           | Bacteria | yes | yes | no  |
| china | brevundimonas vesicularis        | Bacteria | yes | no  | no  |
| china | aspergillus flavus               | Fungi    | no  | no  | no  |
| china | aeromonas media                  | Bacteria | no  | no  | no  |
| china | influenza a virus                | Virus    | yes | yes | yes |
| china | penicillium marneffeii           | Fungi    | yes | yes | yes |
| china | fusarium chlamydosporum          | Fungi    | yes | no  | no  |
| china | porcine parvovirus               | Virus    | no  | no  | no  |
| china | wuchereria bancrofti             | Helminth | yes | no  | yes |
| china | duck circovirus                  | Virus    | no  | no  | no  |
| china | geobacillus stearothermophilus   | Bacteria | no  | no  | no  |
| china | kluveromyces marxianus           | Fungi    | no  | no  | no  |
| china | kluvera intermedia               | Bacteria | no  | no  | no  |
| china | spirometra erinaceieuropaei      | Helminth | no  | no  | no  |
| china | hepatitis a virus                | Virus    | yes | yes | yes |
| china | microbacterium lacticum          | Bacteria | no  | no  | no  |
| china | duck hepatitis b virus           | Virus    | no  | no  | no  |
| china | schizophyllum commune            | Fungi    | yes | no  | no  |
| china | hysterothylacium aduncum         | Helminth | no  | no  | no  |
| china | scytalidium hyalinum             | Fungi    | yes | no  | no  |
| china | burkholderia cepacia             | Bacteria | yes | no  | no  |
| china | cochliobolus geniculatus         | Fungi    | no  | no  | no  |
| china | citrobacter koseri               | Bacteria | yes | yes | no  |
| china | howardella ureilytica            | Bacteria | no  | no  | no  |
| china | enterococcus durans              | Bacteria | yes | yes | no  |
| china | human immunodeficiency virus 2   | Virus    | yes | no  | yes |
| china | actinomadura madurae             | Bacteria | yes | no  | no  |
| china | hepatitis c virus                | Virus    | yes | no  | yes |
| china | aquareovirus c                   | Virus    | no  | no  | no  |
| china | rhodococcus rhodochrous          | Bacteria | yes | no  | no  |
| china | aeromonas veronii                | Bacteria | yes | no  | yes |
| china | aspergillus sydowii              | Fungi    | no  | no  | no  |
| china | trichosporon asahii              | Fungi    | yes | yes | no  |
| china | burkholderia stabilis            | Bacteria | no  | no  | no  |
| china | arcobacter butzleri              | Bacteria | yes | yes | no  |
| china | pseudoalteromonas tetraodonis    | Bacteria | no  | no  | no  |
| china | kyasanur forest disease virus    | Virus    | yes | yes | yes |
| china | enterocytozoon bieneusi          | Fungi    | yes | no  | yes |
| china | babesia microti                  | Protozoa | yes | yes | yes |
| china | aspergillus versicolor           | Fungi    | yes | no  | no  |
| china | shewanella xiamenensis           | Bacteria | no  | no  | no  |
| china | trichinella spiralis             | Helminth | yes | yes | yes |
| china | toxocara malaysiensis            | Helminth | no  | no  | no  |

|       |                              |          |     |     |     |
|-------|------------------------------|----------|-----|-----|-----|
| china | trichoderma longibrachiatum  | Fungi    | no  | no  | no  |
| china | bacillus firmus              | Bacteria | no  | no  | no  |
| china | bordetella bronchiseptica    | Bacteria | yes | yes | no  |
| china | delftia tsuruhatensis        | Bacteria | no  | no  | no  |
| china | burkholderia cenocepacia     | Bacteria | no  | no  | no  |
| china | emericella nidulans          | Fungi    | no  | no  | no  |
| china | neobenedenia melleni         | Helminth | no  | no  | no  |
| china | goatpox virus                | Virus    | no  | no  | no  |
| china | colletotrichum truncatum     | Fungi    | no  | no  | no  |
| china | mucor circinelloides         | Fungi    | yes | yes | no  |
| china | filamoeba sinensis           | Protozoa | no  | no  | no  |
| china | sinorhizobium medicae        | Bacteria | no  | no  | no  |
| china | cyprinid herpesvirus 3       | Virus    | no  | no  | no  |
| china | pasteurella pneumotropica    | Bacteria | yes | yes | no  |
| china | bacillus circulans           | Bacteria | yes | no  | no  |
| china | babesia ovata                | Protozoa | no  | no  | no  |
| china | chicken astrovirus           | Virus    | no  | no  | no  |
| china | aeromonas sobria             | Bacteria | yes | yes | no  |
| china | rotavirus c                  | Virus    | yes | yes | yes |
| china | yersinia ruckeri             | Bacteria | yes | yes | no  |
| china | chikungunya virus            | Virus    | yes | yes | yes |
| china | lactobacillus brevis         | Bacteria | no  | no  | no  |
| china | cryptococcus laurentii       | Fungi    | no  | no  | no  |
| china | avian orthoreovirus          | Virus    | no  | no  | no  |
| china | trichuris ovis               | Helminth | no  | no  | no  |
| china | veronaea botryosa            | Fungi    | yes | no  | no  |
| china | gibberella intermedia        | Fungi    | no  | no  | no  |
| china | bacillus licheniformis       | Bacteria | yes | yes | no  |
| china | pseudomonas stutzeri         | Bacteria | yes | no  | no  |
| china | arthroderma otae             | Fungi    | no  | no  | no  |
| china | vibrio scophthalmi           | Bacteria | no  | no  | no  |
| china | seoul virus                  | Virus    | yes | yes | yes |
| china | corynebacterium striatum     | Bacteria | yes | no  | no  |
| china | exiguobacterium acetylicum   | Bacteria | no  | no  | no  |
| china | bacillus endophyticus        | Bacteria | no  | no  | no  |
| china | cetacean morbillivirus       | Virus    | no  | no  | no  |
| china | clostridium butyricum        | Bacteria | yes | no  | no  |
| china | cryptosporidium parvum       | Protozoa | yes | yes | yes |
| china | rhodococcus erythropolis     | Bacteria | yes | no  | no  |
| china | fusarium subglutinans        | Fungi    | yes | no  | no  |
| china | arcobacter cryaerophilus     | Bacteria | yes | yes | no  |
| china | stenotrophomonas maltophilia | Bacteria | no  | no  | no  |
| china | leishmania turanica          | Protozoa | no  | no  | no  |
| china | borrelia afzelii             | Bacteria | no  | no  | no  |
| china | acremonium strictum          | Fungi    | yes | no  | no  |
| china | neocallimastix frontalis     | Fungi    | no  | no  | no  |
| china | cordyceps bassiana           | Fungi    | no  | no  | no  |
| china | oesophagostomum dentatum     | Helminth | no  | no  | no  |
| china | serratia marcescens          | Bacteria | yes | yes | yes |
| china | human papillomavirus 6       | Virus    | no  | no  | no  |

|       |                                       |          |     |     |     |
|-------|---------------------------------------|----------|-----|-----|-----|
| china | mycoplasma suis                       | Bacteria | no  | no  | no  |
| china | eurotium amstelodami                  | Fungi    | no  | no  | no  |
| china | schistosoma japonicum                 | Helminth | yes | yes | no  |
| china | ascaridia galli                       | Helminth | no  | no  | no  |
| china | bacillus flexus                       | Bacteria | no  | no  | no  |
| china | avian coronavirus                     | Virus    | no  | no  | no  |
| china | ochrobactrum anthropi                 | Bacteria | yes | no  | no  |
| china | plasmodium vivax                      | Protozoa | yes | no  | yes |
| china | candida dubliniensis                  | Fungi    | yes | no  | no  |
| china | aspergillus insuetus                  | Fungi    | no  | no  | no  |
| china | taenia hydatigena                     | Helminth | no  | no  | no  |
| china | brucella melitensis                   | Bacteria | yes | yes | yes |
| china | anisakis typica                       | Helminth | no  | no  | no  |
| china | lactococcus lactis                    | Bacteria | no  | no  | no  |
| china | human papillomavirus 16               | Virus    | no  | no  | no  |
| china | ancylostoma duodenale                 | Helminth | yes | yes | no  |
| china | shigella sonnei                       | Bacteria | yes | yes | no  |
| china | shewanella putrefaciens               | Bacteria | no  | no  | no  |
| china | trichoderma atroviride                | Fungi    | no  | no  | no  |
| china | macrococcus caseolyticus              | Bacteria | no  | no  | no  |
| china | sendai virus                          | Virus    | no  | no  | no  |
| china | candida glabrata                      | Fungi    | yes | yes | yes |
| china | providencia rettgeri                  | Bacteria | yes | yes | no  |
| china | fonsecaea pedrosoi                    | Fungi    | no  | no  | no  |
| china | mycoplasma gallisepticum              | Bacteria | no  | no  | no  |
| china | photobacterium damsela                | Bacteria | yes | yes | no  |
| china | kushneria marisflavi                  | Bacteria | no  | no  | no  |
| china | staphylococcus aureus                 | Bacteria | yes | yes | yes |
| china | cryptosporidium ryanae                | Protozoa | no  | no  | no  |
| china | cryptococcus gattii                   | Fungi    | no  | no  | no  |
| china | serratia liquefaciens                 | Bacteria | no  | no  | no  |
| china | corynebacterium bovis                 | Bacteria | yes | yes | no  |
| china | rubella virus                         | Virus    | yes | no  | no  |
| china | taenia taeniaeformis                  | Helminth | yes | yes | no  |
| china | avian leukosis virus                  | Virus    | no  | no  | no  |
| china | betacoronavirus 1                     | Virus    | no  | no  | no  |
| china | aspergillus ochraceus                 | Fungi    | no  | no  | no  |
| china | psychrobacter pulmonis                | Bacteria | no  | no  | no  |
| china | redspotted grouper nervous necrosis v | Virus    | no  | no  | no  |
| china | pseudallescheria boydii               | Fungi    | no  | no  | no  |
| china | taenia saginata                       | Helminth | yes | yes | no  |
| china | arthrobacter oxydans                  | Bacteria | no  | no  | no  |
| china | candida intermedia                    | Fungi    | yes | no  | no  |
| china | aspergillus candidus                  | Fungi    | yes | no  | no  |
| china | staphylococcus hominis                | Bacteria | no  | no  | no  |
| china | edwardsiella ictaluri                 | Bacteria | no  | no  | no  |
| china | aeromonas hydrophila                  | Bacteria | yes | yes | yes |
| china | human adenovirus f                    | Virus    | yes | no  | no  |
| china | helicobacter pylori                   | Bacteria | yes | yes | no  |
| china | trianchoratus gussevi                 | Helminth | no  | no  | no  |

|       |                               |          |     |     |     |
|-------|-------------------------------|----------|-----|-----|-----|
| china | vibrio tasmaniensis           | Bacteria | no  | no  | no  |
| china | borrelia garinii              | Bacteria | no  | no  | no  |
| china | listeria welshimeri           | Bacteria | yes | yes | no  |
| china | duck parvovirus               | Virus    | no  | no  | no  |
| china | comamonas testosteroni        | Bacteria | yes | no  | no  |
| china | eimeria brunetti              | Protozoa | no  | no  | no  |
| china | zaire ebolavirus              | Virus    | yes | yes | yes |
| china | theileria buffeli             | Protozoa | no  | no  | no  |
| china | dentiphilometra monopteri     | Helminth | no  | no  | no  |
| china | aspergillus unguis            | Fungi    | no  | no  | no  |
| china | ochrobactrum haematophilum    | Bacteria | no  | no  | no  |
| china | trichuris suis                | Helminth | yes | yes | no  |
| china | pichia kudriavzevii           | Fungi    | no  | no  | no  |
| china | pseudoalteromonas spongiae    | Bacteria | no  | no  | no  |
| china | human adenovirus d            | Virus    | yes | no  | no  |
| china | frog virus 3                  | Virus    | no  | no  | no  |
| china | aeromonas jandaei             | Bacteria | no  | no  | no  |
| china | trichosporon inkin            | Fungi    | yes | yes | no  |
| china | mammalian orthoreovirus       | Virus    | no  | no  | no  |
| china | tembusu virus                 | Virus    | no  | no  | no  |
| china | paecilomyces variotii         | Fungi    | yes | yes | no  |
| china | orf virus                     | Virus    | yes | yes | no  |
| china | classical swine fever virus   | Virus    | no  | no  | no  |
| china | bk polyomavirus               | Virus    | no  | no  | no  |
| china | human picobirnavirus          | Virus    | no  | no  | no  |
| china | aspergillus fumigatus         | Fungi    | no  | no  | no  |
| china | candida humilis               | Fungi    | no  | no  | no  |
| china | alphacoronavirus 1            | Virus    | no  | no  | no  |
| china | pseudomonas xanthomarina      | Bacteria | no  | no  | no  |
| china | rotavirus b                   | Virus    | yes | yes | yes |
| china | torque teno sus virus 2       | Virus    | no  | no  | no  |
| china | neosartorya glabra            | Fungi    | no  | no  | no  |
| china | microbacterium schleiferi     | Bacteria | no  | no  | no  |
| china | taenia asiatica               | Helminth | no  | no  | no  |
| china | botryosphaeria dothidea       | Fungi    | no  | no  | no  |
| china | oceanobacillus oncorhynchi    | Bacteria | no  | no  | no  |
| china | spring viraemia of carp virus | Virus    | no  | no  | no  |
| china | measles virus                 | Virus    | yes | yes | yes |
| china | human herpesvirus 8           | Virus    | yes | no  | yes |
| china | mycoplasma wenyonii           | Bacteria | no  | no  | no  |
| china | burkholderia pseudomallei     | Bacteria | yes | yes | no  |
| china | fowlpox virus                 | Virus    | no  | no  | no  |
| china | salmonella enterica           | Bacteria | no  | no  | no  |
| china | leuconostoc citreum           | Bacteria | no  | no  | no  |
| china | mycoplasma hyopneumoniae      | Bacteria | no  | no  | no  |
| china | moraxella osloensis           | Bacteria | yes | no  | no  |
| china | sporothrix albicans           | Fungi    | no  | no  | no  |
| china | getah virus                   | Virus    | yes | yes | no  |
| china | sarcocystis hominis           | Protozoa | yes | yes | no  |
| china | streptococcus dysgalactiae    | Bacteria | no  | no  | no  |



|       |                                |          |     |     |     |
|-------|--------------------------------|----------|-----|-----|-----|
| china | dietzia natronolimnaea         | Bacteria | no  | no  | no  |
| china | philometroides pseudorasbori   | Helminth | no  | no  | no  |
| china | canid herpesvirus 1            | Virus    | no  | no  | no  |
| china | corynebacterium stationis      | Bacteria | no  | no  | no  |
| china | cryptococcus neoformans        | Fungi    | yes | yes | yes |
| china | bacillus amyloliquefaciens     | Bacteria | no  | no  | no  |
| china | fusarium oxysporum             | Fungi    | yes | no  | yes |
| china | mycobacterium scrofulaceum     | Bacteria | yes | yes | no  |
| china | parabacteroides merdae         | Bacteria | no  | no  | no  |
| china | human herpesvirus 1            | Virus    | no  | no  | no  |
| china | dactylogyrus inversus          | Helminth | no  | no  | no  |
| china | penicillium brevicompactum     | Fungi    | no  | no  | no  |
| china | plectosphaerella cucumerina    | Fungi    | no  | no  | no  |
| china | baylisascaris procyonis        | Helminth | yes | yes | no  |
| china | lysinibacillus sphaericus      | Bacteria | no  | no  | no  |
| china | canine distemper virus         | Virus    | no  | no  | no  |
| china | dactylogyrus petruschewskyi    | Helminth | no  | no  | no  |
| china | fasciola gigantica             | Helminth | yes | yes | no  |
| china | debaryomyces fabryi            | Fungi    | no  | no  | no  |
| china | histomonas meleagridis         | Protozoa | no  | no  | no  |
| china | avian adeno-associated virus   | Virus    | no  | no  | no  |
| china | echinococcus canadensis        | Helminth | no  | no  | no  |
| china | balantidium coli               | Protozoa | yes | yes | no  |
| china | bovine enterovirus             | Virus    | no  | no  | no  |
| china | pseudomonas poae               | Bacteria | no  | no  | no  |
| china | cryptosporidium ubiquitum      | Protozoa | no  | no  | no  |
| china | duck hepatitis a virus         | Virus    | no  | no  | no  |
| china | california encephalitis virus  | Virus    | yes | yes | yes |
| china | hortaea werneckii              | Fungi    | yes | no  | no  |
| china | bacillus anthracis             | Bacteria | yes | yes | yes |
| china | theileria sergenti             | Protozoa | no  | no  | no  |
| china | weissella confusa              | Bacteria | no  | no  | no  |
| china | hepatitis delta virus          | Virus    | yes | no  | no  |
| china | phialemonium obovatum          | Fungi    | yes | yes | no  |
| china | bacillus clausii               | Bacteria | no  | no  | no  |
| china | gallibacterium anatis          | Bacteria | no  | no  | no  |
| china | variola virus                  | Virus    | no  | no  | no  |
| china | bordetella pertussis           | Bacteria | yes | no  | yes |
| china | human papillomavirus 32        | Virus    | no  | no  | no  |
| china | quadriacanthus kobiensis       | Helminth | no  | no  | no  |
| china | epicoccum nigrum               | Fungi    | no  | no  | no  |
| china | bacillus coagulans             | Bacteria | yes | yes | no  |
| china | philometroides fulvidraconi    | Helminth | no  | no  | no  |
| china | thelazia callipaeda            | Helminth | yes | yes | no  |
| china | ochrobactrum intermedium       | Bacteria | no  | no  | no  |
| china | lactobacillus plantarum        | Bacteria | no  | no  | no  |
| china | listeria innocua               | Bacteria | no  | no  | no  |
| china | lodderomyces elongisporus      | Fungi    | no  | no  | no  |
| china | human immunodeficiency virus 1 | Virus    | yes | no  | yes |
| china | octomacrum mexicanum           | Helminth | no  | no  | no  |

|       |                                |          |     |     |     |
|-------|--------------------------------|----------|-----|-----|-----|
| china | penicillium griseofulvum       | Fungi    | no  | no  | no  |
| china | microbacterium paraoxydans     | Bacteria | no  | no  | no  |
| china | staphylococcus sciuri          | Bacteria | no  | no  | no  |
| china | rotavirus a                    | Virus    | yes | yes | yes |
| china | nocardia seriolae              | Bacteria | no  | no  | no  |
| china | aspergillus awamori            | Fungi    | no  | no  | no  |
| china | helicobacter hepaticus         | Bacteria | no  | no  | no  |
| china | pseudomonas brenneri           | Bacteria | no  | no  | no  |
| china | cryptosporidium bovis          | Protozoa | no  | no  | no  |
| china | saccharomyces cerevisiae       | Fungi    | yes | no  | no  |
| china | microbacterium flavescens      | Bacteria | no  | no  | no  |
| china | theileria orientalis           | Protozoa | no  | no  | no  |
| china | trichostrongylus colubriformis | Helminth | yes | yes | no  |
| china | klebsiella oxytoca             | Bacteria | yes | yes | no  |
| china | neoscytalidium dimidiatum      | Fungi    | no  | no  | no  |
| china | enterobius vermicularis        | Helminth | yes | yes | no  |
| china | human rhinovirus b             | Virus    | yes | no  | no  |
| china | pseudomonas chlororaphis       | Bacteria | no  | no  | no  |
| china | fusobacterium periodonticum    | Bacteria | yes | no  | no  |
| china | anaplasma bovis                | Bacteria | no  | no  | no  |
| china | tatumella ptyseos              | Bacteria | yes | no  | no  |
| china | haemophilus influenzae         | Bacteria | yes | no  | yes |
| china | cronobacter malonaticus        | Bacteria | no  | no  | no  |
| china | hepatitis e virus              | Virus    | yes | yes | yes |
| china | torque teno felis virus        | Virus    | no  | no  | no  |
| china | neisseria gonorrhoeae          | Bacteria | yes | no  | yes |
| china | babesia bigemina               | Protozoa | no  | no  | no  |
| china | taenia multiceps               | Helminth | yes | no  | no  |
| china | rhodococcus qingshengii        | Bacteria | no  | no  | no  |
| china | sarcocystis hirsuta            | Protozoa | no  | no  | no  |
| china | eimeria tenella                | Protozoa | no  | no  | no  |
| china | trichomonas vaginalis          | Protozoa | yes | no  | yes |
| china | arthroderma grubyi             | Fungi    | no  | no  | no  |
| china | bartonella vinsonii            | Bacteria | no  | no  | no  |
| china | botryosphaeria rhodina         | Fungi    | no  | no  | no  |
| china | enterobacter kobei             | Bacteria | no  | no  | no  |
| china | staphylococcus lentus          | Bacteria | no  | no  | no  |
| china | burkholderia tropica           | Bacteria | no  | no  | no  |
| china | sarcocystis sui hominis        | Protozoa | yes | yes | no  |
| china | trichosporon cutaneum          | Fungi    | yes | yes | no  |
| china | taenia pisiformis              | Helminth | no  | no  | no  |
| china | tick-borne encephalitis virus  | Virus    | no  | no  | no  |
| china | kytrococcus schroeteri         | Bacteria | no  | no  | no  |
| china | gnathostoma spinigerum         | Helminth | yes | yes | no  |
| china | lactobacillus helveticus       | Bacteria | no  | no  | no  |
| china | engyodontium album             | Fungi    | yes | no  | no  |
| china | alteromonas macleodii          | Bacteria | no  | no  | no  |
| china | lactobacillus salivarius       | Bacteria | no  | no  | no  |
| china | aichi virus                    | Virus    | no  | no  | no  |
| china | staphylococcus pasteurii       | Bacteria | no  | no  | no  |

|       |                                       |          |     |     |     |
|-------|---------------------------------------|----------|-----|-----|-----|
| china | thaparocleidus campylopterocirrus     | Helminth | no  | no  | no  |
| china | sindbis virus                         | Virus    | yes | yes | yes |
| china | human enterovirus c                   | Virus    | yes | no  | no  |
| china | human adenovirus e                    | Virus    | yes | no  | no  |
| china | lactobacillus vaginalis               | Bacteria | no  | no  | no  |
| china | theileria ovis                        | Protozoa | no  | no  | no  |
| china | bacillus cereus                       | Bacteria | yes | yes | no  |
| china | dirofilaria repens                    | Helminth | yes | yes | no  |
| china | mycobacterium abscessus               | Bacteria | yes | yes | no  |
| china | penicillium citreonigrum              | Fungi    | no  | no  | no  |
| china | staphylococcus capitis                | Bacteria | no  | no  | no  |
| china | chlamydia trachomatis                 | Bacteria | yes | yes | yes |
| china | peste-des-petits-ruminants virus      | Virus    | no  | no  | no  |
| china | arthroderma benhamiae                 | Fungi    | no  | no  | no  |
| china | human papillomavirus 26               | Virus    | no  | no  | no  |
| china | shigella flexneri                     | Bacteria | yes | yes | no  |
| china | bacillus megaterium                   | Bacteria | no  | no  | no  |
| china | equine infectious anemia virus        | Virus    | no  | no  | no  |
| china | reticuloendotheliosis virus           | Virus    | no  | no  | no  |
| china | pseudomonas monteilii                 | Bacteria | no  | no  | no  |
| china | bacillus mycoides                     | Bacteria | yes | no  | no  |
| china | enterococcus italicus                 | Bacteria | no  | no  | no  |
| china | vibrio rotiferianus                   | Bacteria | no  | no  | no  |
| china | chlamydophila pneumoniae              | Bacteria | yes | yes | no  |
| china | wickerhamomyces anomalus              | Fungi    | no  | no  | no  |
| china | candida albicans                      | Fungi    | yes | yes | yes |
| china | cladosporium bruhnei                  | Fungi    | no  | no  | no  |
| china | haemonchus contortus                  | Helminth | yes | yes | no  |
| china | raoultella ornithinolytica            | Bacteria | no  | no  | no  |
| china | vibrio cholerae                       | Bacteria | yes | no  | yes |
| china | providencia vermicola                 | Bacteria | no  | no  | no  |
| china | proteus mirabilis                     | Bacteria | yes | yes | no  |
| china | bacillus sonorensis                   | Bacteria | no  | no  | no  |
| china | aspergillus terreus                   | Fungi    | no  | no  | no  |
| china | severe acute respiratory syndrome-rel | Virus    | no  | no  | no  |
| china | leuconostoc pseudomesenteroides       | Bacteria | no  | no  | no  |
| china | baylisascaris ailuri                  | Helminth | no  | no  | no  |
| china | human rhinovirus a                    | Virus    | yes | no  | no  |
| china | lewia infectoria                      | Fungi    | no  | no  | no  |
| china | bacillus pumilus                      | Bacteria | yes | no  | no  |
| china | tsukamurella tyrosinosolvens          | Bacteria | yes | no  | no  |
| china | fusobacterium nucleatum               | Bacteria | yes | yes | no  |
| china | bartonella henselae                   | Bacteria | yes | yes | no  |
| china | human herpesvirus 4                   | Virus    | no  | no  | no  |
| china | microbacterium foliorum               | Bacteria | no  | no  | no  |
| china | human papillomavirus 18               | Virus    | no  | no  | no  |
| china | cryptosporidium cuniculus             | Protozoa | yes | yes | no  |
| china | cryptosporidium suis                  | Protozoa | no  | no  | no  |
| china | human herpesvirus 2                   | Virus    | no  | no  | no  |
| china | mycoplasma bovis                      | Bacteria | no  | no  | no  |

|       |                               |          |     |     |     |
|-------|-------------------------------|----------|-----|-----|-----|
| china | ascaris lumbricoides          | Helminth | yes | yes | no  |
| china | aleutian mink disease virus   | Virus    | no  | no  | no  |
| china | human papillomavirus 61       | Virus    | no  | no  | no  |
| china | coxiella burnetii             | Bacteria | yes | yes | no  |
| china | hantaan virus                 | Virus    | yes | yes | yes |
| china | canine minute virus           | Virus    | no  | no  | no  |
| china | pantoea cedenensis            | Bacteria | no  | no  | no  |
| china | pantoea brenneri              | Bacteria | no  | no  | no  |
| china | trichuris discolor            | Helminth | no  | no  | no  |
| china | enterobacter amnigenus        | Bacteria | yes | yes | no  |
| china | camallanus hypophthalmichthys | Helminth | no  | no  | no  |
| china | yellow fever virus            | Virus    | yes | yes | yes |
| china | human papillomavirus 34       | Virus    | no  | no  | no  |
| china | pseudomonas aeruginosa        | Bacteria | yes | yes | yes |
| china | vibrio mimicus                | Bacteria | yes | yes | no  |
| china | fasciola hepatica             | Helminth | yes | yes | no  |
| china | philometroides cyprini        | Helminth | no  | no  | no  |
| china | digamma interrupta            | Helminth | no  | no  | no  |
| china | lactobacillus ruminis         | Bacteria | no  | no  | no  |
| china | enterococcus thailandicus     | Bacteria | no  | no  | no  |
| china | pseudomonas fluorescens       | Bacteria | yes | no  | no  |
| china | echinococcus shiquicus        | Helminth | no  | no  | no  |
| china | aeromonas caviae              | Bacteria | yes | yes | yes |
| china | providencia stuartii          | Bacteria | yes | yes | no  |
| china | enterobacter cancerogenus     | Bacteria | yes | yes | no  |
| china | fusarium solani               | Fungi    | yes | yes | yes |
| china | listeria monocytogenes        | Bacteria | yes | yes | yes |
| china | acinetobacter johnsonii       | Bacteria | yes | no  | no  |
| china | khawia sinensis               | Helminth | no  | no  | no  |
| china | fusobacterium necrophorum     | Bacteria | yes | yes | no  |
| china | rickettsia massiliae          | Bacteria | yes | yes | no  |
| china | anaplasma ovis                | Bacteria | no  | no  | no  |
| china | baylisascaris schroederi      | Helminth | no  | no  | no  |
| china | candida tropicalis            | Fungi    | yes | yes | no  |
| china | syphacia obvelata             | Helminth | no  | no  | no  |
| china | nocardiopsis alba             | Bacteria | no  | no  | no  |
| china | japanese encephalitis virus   | Virus    | yes | yes | yes |
| china | shigella dysenteriae          | Bacteria | yes | yes | yes |
| china | baylisascaris transfuga       | Helminth | no  | no  | no  |
| china | chaetomium globosum           | Fungi    | yes | no  | no  |
| china | mucor hiemalis                | Fungi    | yes | no  | no  |
| china | acinetobacter lwoffii         | Bacteria | yes | no  | no  |
| china | rickettsia africae            | Bacteria | yes | yes | no  |
| china | dietzia maris                 | Bacteria | no  | no  | no  |
| china | mycobacterium tuberculosis    | Bacteria | yes | yes | yes |
| china | achromobacter piechaudii      | Bacteria | yes | no  | no  |
| china | turkey adenovirus a           | Virus    | no  | no  | no  |
| china | hepatitis b virus             | Virus    | yes | no  | yes |
| china | nocardia asteroides           | Bacteria | yes | yes | no  |
| china | cryptosporidium hominis       | Protozoa | yes | no  | yes |

|       |                                       |          |     |     |     |
|-------|---------------------------------------|----------|-----|-----|-----|
| china | <i>lactobacillus rhamnosus</i>        | Bacteria | no  | no  | no  |
| china | <i>methylobacterium radiotolerans</i> | Bacteria | no  | no  | no  |
| china | <i>theileria uilenbergi</i>           | Protozoa | no  | no  | no  |
| china | <i>camallanus cotti</i>               | Helminth | no  | no  | no  |
| china | <i>streptococcus suis</i>             | Bacteria | yes | yes | no  |
| china | <i>rickettsia typhi</i>               | Bacteria | yes | yes | no  |
| china | <i>aspergillus ustus</i>              | Fungi    | no  | no  | no  |
| china | <i>gallid herpesvirus 2</i>           | Virus    | no  | no  | no  |
| china | <i>anaplasma marginale</i>            | Bacteria | no  | no  | no  |
| china | <i>klebsiella pneumoniae</i>          | Bacteria | yes | yes | yes |
| china | <i>pseudomonas alcaligenes</i>        | Bacteria | yes | no  | no  |
| china | <i>meyerozyma guilliermondii</i>      | Fungi    | no  | no  | no  |
| china | <i>lactobacillus crispatus</i>        | Bacteria | no  | no  | no  |
| china | <i>listeria ivanovii</i>              | Bacteria | yes | yes | no  |
| china | <i>human metapneumovirus</i>          | Virus    | no  | no  | no  |
| china | <i>prevotella micans</i>              | Bacteria | no  | no  | no  |
| china | <i>pseudomonas otitidis</i>           | Bacteria | no  | no  | no  |
| china | <i>porcine teschovirus</i>            | Virus    | no  | no  | no  |
| china | <i>microbacterium phyllosphaerae</i>  | Bacteria | no  | no  | no  |
| china | <i>anisakis pegreffii</i>             | Helminth | no  | no  | no  |
| china | <i>mesorhizobium loti</i>             | Bacteria | no  | no  | no  |
| china | <i>bothriocephalus acheilognathi</i>  | Helminth | no  | no  | no  |
| china | <i>lactobacillus curvatus</i>         | Bacteria | no  | no  | no  |
| china | <i>gibberella moniliformis</i>        | Fungi    | no  | no  | no  |
| china | <i>nocardiopsis dassonvillei</i>      | Bacteria | no  | no  | no  |
| china | <i>brevibacillus brevis</i>           | Bacteria | yes | no  | no  |
| china | <i>aspergillus viridinutans</i>       | Fungi    | no  | no  | no  |
| china | <i>lichtheimia ramosa</i>             | Fungi    | no  | no  | no  |
| china | <i>acinetobacter junii</i>            | Bacteria | yes | no  | no  |
| china | <i>bovine viral diarrhea virus 1</i>  | Virus    | no  | no  | no  |
| china | <i>puumala virus</i>                  | Virus    | yes | yes | yes |
| china | <i>diplorchis shilinensis</i>         | Helminth | no  | no  | no  |
| china | <i>mycobacterium gordonae</i>         | Bacteria | yes | no  | no  |
| china | <i>staphylococcus pettenkoferi</i>    | Bacteria | no  | no  | no  |
| china | <i>haemophilus parasuis</i>           | Bacteria | no  | no  | no  |
| china | <i>human coronavirus hku1</i>         | Virus    | no  | no  | no  |
| china | <i>pharyngostomum cordatum</i>        | Helminth | no  | no  | no  |
| china | <i>penicillium citrinum</i>           | Fungi    | yes | no  | no  |
| china | <i>rhizomucor miehei</i>              | Fungi    | yes | yes | no  |
| china | <i>anguillicoloides australiensis</i> | Helminth | no  | no  | no  |
| china | <i>babesia motasi</i>                 | Protozoa | no  | no  | no  |
| china | <i>pediococcus pentosaceus</i>        | Bacteria | no  | no  | no  |
| china | <i>ochrobactrum pseudogrignonense</i> | Bacteria | no  | no  | no  |
| china | <i>feline panleukopenia virus</i>     | Virus    | no  | no  | no  |
| china | <i>aureobasidium pullulans</i>        | Fungi    | yes | no  | no  |
| china | <i>cladosporium oxysporum</i>         | Fungi    | yes | no  | no  |
| china | <i>haemoproteus pallidus</i>          | Protozoa | no  | no  | no  |
| china | <i>acinetobacter calcoaceticus</i>    | Bacteria | yes | no  | no  |
| china | <i>pepper mild mottle virus</i>       | Virus    | no  | no  | no  |
| china | <i>lactobacillus sakei</i>            | Bacteria | no  | no  | no  |

|       |                                       |          |     |     |     |
|-------|---------------------------------------|----------|-----|-----|-----|
| china | <i>psychrobacter maritimus</i>        | Bacteria | no  | no  | no  |
| china | <i>paragonimus iloktsuenensis</i>     | Helminth | no  | no  | no  |
| china | human parechovirus                    | Virus    | no  | no  | no  |
| china | <i>theileria sinensis</i>             | Protozoa | no  | no  | no  |
| china | <i>bacillus aquimaris</i>             | Bacteria | no  | no  | no  |
| china | <i>clostridium perfringens</i>        | Bacteria | yes | yes | no  |
| china | porcine epidemic diarrhea virus       | Virus    | no  | no  | no  |
| china | <i>streptococcus equinus</i>          | Bacteria | no  | no  | no  |
| china | <i>vibrio parahaemolyticus</i>        | Bacteria | yes | yes | yes |
| china | <i>echinorhynchus gadi</i>            | Helminth | no  | no  | no  |
| china | <i>pantoea agglomerans</i>            | Bacteria | yes | yes | no  |
| china | hirame rhabdovirus                    | Virus    | no  | no  | no  |
| china | bluetongue virus                      | Virus    | no  | no  | no  |
| china | <i>edwardsiella tarda</i>             | Bacteria | yes | yes | no  |
| china | <i>burkholderia gladioli</i>          | Bacteria | no  | no  | no  |
| china | <i>achromobacter xylosoxidans</i>     | Bacteria | yes | no  | no  |
| china | <i>pestalotiopsis microspora</i>      | Fungi    | no  | no  | no  |
| china | <i>aspergillus flavipes</i>           | Fungi    | yes | no  | no  |
| china | <i>lawsonia intracellularis</i>       | Bacteria | no  | no  | no  |
| china | <i>mycoplasma capricolum</i>          | Bacteria | no  | no  | no  |
| china | murine leukemia virus                 | Virus    | no  | no  | no  |
| china | <i>trichodinella epizootica</i>       | Protozoa | no  | no  | no  |
| china | goose parvovirus                      | Virus    | no  | no  | no  |
| china | <i>echinococcus multilocularis</i>    | Helminth | yes | yes | no  |
| china | <i>aeromonas aquariorum</i>           | Bacteria | no  | no  | no  |
| china | foot-and-mouth disease virus          | Virus    | no  | no  | no  |
| china | gallid herpesvirus 1                  | Virus    | no  | no  | no  |
| china | <i>orientia tsutsugamushi</i>         | Bacteria | yes | yes | no  |
| china | <i>trypanosoma grosi</i>              | Protozoa | no  | no  | no  |
| china | <i>rhodococcus fascians</i>           | Bacteria | yes | no  | no  |
| china | bovine viral diarrhea virus 2         | Virus    | no  | no  | no  |
| china | <i>pseudomonas pseudoalcaligenes</i>  | Bacteria | yes | no  | no  |
| china | <i>dollfustrema vaneyi</i>            | Helminth | no  | no  | no  |
| china | influenza b virus                     | Virus    | yes | yes | no  |
| china | caprine arthritis encephalitis virus  | Virus    | no  | no  | no  |
| china | <i>staphylococcus saprophyticus</i>   | Bacteria | yes | no  | no  |
| china | <i>philometroides carassii</i>        | Helminth | no  | no  | no  |
| china | <i>theileria capreoli</i>             | Protozoa | no  | no  | no  |
| china | <i>trichuris skrjabini</i>            | Helminth | no  | no  | no  |
| china | <i>alcaligenes faecalis</i>           | Bacteria | no  | no  | no  |
| china | <i>lactobacillus paracasei</i>        | Bacteria | no  | no  | no  |
| china | <i>debaryomyces hansenii</i>          | Fungi    | no  | no  | no  |
| china | human papillomavirus 54               | Virus    | no  | no  | no  |
| china | <i>legionella pneumophila</i>         | Bacteria | yes | no  | yes |
| china | <i>aerococcus viridans</i>            | Bacteria | yes | no  | no  |
| china | <i>cupriavidus taiwanensis</i>        | Bacteria | no  | no  | no  |
| china | <i>psychrobacter cibarius</i>         | Bacteria | no  | no  | no  |
| china | <i>elizabethkingia meningoseptica</i> | Bacteria | no  | no  | no  |
| china | <i>staphylococcus haemolyticus</i>    | Bacteria | yes | yes | no  |
| china | <i>staphylococcus epidermidis</i>     | Bacteria | yes | yes | yes |

|       |                                        |          |     |     |     |
|-------|----------------------------------------|----------|-----|-----|-----|
| china | corynebacterium urealyticum            | Bacteria | yes | no  | no  |
| china | porcine sapelovirus                    | Virus    | no  | no  | no  |
| china | lactobacillus delbrueckii              | Bacteria | no  | no  | no  |
| china | human rhinovirus c                     | Virus    | no  | no  | no  |
| china | lactobacillus jensenii                 | Bacteria | no  | no  | no  |
| china | aspergillus oryzae                     | Fungi    | yes | no  | no  |
| china | bothriocephalus claviceps              | Helminth | no  | no  | no  |
| china | ajellomyces capsulatus                 | Fungi    | no  | no  | no  |
| china | liao ning virus                        | Virus    | no  | no  | no  |
| china | entamoeba histolytica                  | Protozoa | yes | yes | no  |
| china | human papillomavirus 7                 | Virus    | no  | no  | no  |
| china | eurytrema pancreaticum                 | Helminth | yes | yes | no  |
| china | moraxella catarrhalis                  | Bacteria | no  | no  | no  |
| china | microbacterium oxydans                 | Bacteria | no  | no  | no  |
| china | porcine reproductive and respiratory s | Virus    | no  | no  | no  |
| china | penicillium chrysogenum                | Fungi    | yes | no  | no  |
| china | achromobacter denitrificans            | Bacteria | no  | no  | no  |
| china | banna virus                            | Virus    | yes | yes | yes |
| china | entamoeba nuttalli                     | Protozoa | no  | no  | no  |
| china | human enterovirus a                    | Virus    | yes | no  | no  |
| china | pantoea conspicua                      | Bacteria | no  | no  | no  |
| china | budgerigar fledgling disease polyomavi | Virus    | no  | no  | no  |
| china | rhodotorula mucilaginosa               | Fungi    | yes | yes | no  |
| china | aliivibrio fischeri                    | Bacteria | no  | no  | no  |
| china | lactobacillus parabuchneri             | Bacteria | no  | no  | no  |
| china | candida ethanolica                     | Fungi    | no  | no  | no  |
| china | leuconostoc mesenteroides              | Bacteria | no  | no  | no  |
| china | primate t-lymphotropic virus 1         | Virus    | no  | no  | no  |
| china | philometra clavaiceps                  | Helminth | no  | no  | no  |
| china | bunostomum trigonocephalum             | Helminth | no  | no  | no  |
| china | avibacterium paragallinarum            | Bacteria | no  | no  | no  |
| china | vibrio azureus                         | Bacteria | no  | no  | no  |
| china | human parainfluenza virus 3            | Virus    | yes | no  | no  |
| china | babesia bovis                          | Protozoa | yes | yes | no  |
| china | sporothrix schenckii                   | Fungi    | yes | yes | no  |
| china | cladosporium cladosporioides           | Fungi    | yes | no  | no  |
| china | paragonimus skrjabini                  | Helminth | yes | yes | no  |
| china | jc polyomavirus                        | Virus    | no  | no  | no  |
| china | sapporo virus                          | Virus    | no  | no  | no  |
| china | enterococcus faecium                   | Bacteria | yes | yes | yes |
| china | lactobacillus farciminis               | Bacteria | no  | no  | no  |
| china | microbacterium trichothecenolyticum    | Bacteria | no  | no  | no  |
| china | eimeria praecox                        | Protozoa | no  | no  | no  |
| china | laribacter hongkongensis               | Bacteria | no  | no  | no  |
| china | human coronavirus nl63                 | Virus    | no  | no  | no  |
| china | aspergillus niger                      | Fungi    | yes | yes | no  |
| china | kluyvera cryocrescens                  | Bacteria | yes | yes | no  |
| china | micrococcus luteus                     | Bacteria | no  | no  | no  |
| china | paragonimus westermani                 | Helminth | yes | yes | no  |
| china | raoultella terrigena                   | Bacteria | no  | no  | no  |

|          |                                                     |          |     |     |     |
|----------|-----------------------------------------------------|----------|-----|-----|-----|
| china    | ornithobacterium rhinotracheale                     | Bacteria | no  | no  | no  |
| china    | giardia intestinalis                                | Protozoa | no  | no  | no  |
| china    | setosphaeria rostrata                               | Fungi    | yes | no  | no  |
| china    | porcine enterovirus b                               | Virus    | no  | no  | no  |
| china    | crimean-congo hemorrhagic fever virus               | Virus    | no  | no  | no  |
| china    | bovine ephemeral fever virus                        | Virus    | yes | yes | no  |
| china    | moraxella lacunata                                  | Bacteria | yes | yes | no  |
| china    | clostridium septicum                                | Bacteria | yes | yes | no  |
| china    | simian virus 40                                     | Virus    | no  | no  | no  |
| china    | trichophyton mentagrophytes                         | Fungi    | yes | yes | no  |
| china    | taenia solium                                       | Helminth | yes | no  | yes |
| china    | micrococcus yunnanensis                             | Bacteria | no  | no  | no  |
| china    | yersinia intermedia                                 | Bacteria | yes | yes | no  |
| china    | flavobacterium lindanitolerans                      | Bacteria | no  | no  | no  |
| china    | proteus vulgaris                                    | Bacteria | yes | yes | no  |
| china    | vibrio campbellii                                   | Bacteria | no  | no  | no  |
| china    | staphylococcus simulans                             | Bacteria | no  | no  | no  |
| china    | dollfustrema hefeiensis                             | Helminth | no  | no  | no  |
| china    | cryptosporidium andersoni                           | Protozoa | no  | no  | no  |
| china    | eimeria maxima                                      | Protozoa | no  | no  | no  |
| china    | dactylogyrus lamellatus                             | Helminth | no  | no  | no  |
| china    | staphylococcus equorum                              | Bacteria | no  | no  | no  |
| china    | ralstonia pickettii                                 | Bacteria | yes | no  | no  |
| china    | vibrio sinaloensis                                  | Bacteria | no  | no  | no  |
| china    | anaplasma phagocytophilum                           | Bacteria | no  | no  | no  |
| china    | pseudomonas putida                                  | Bacteria | yes | no  | no  |
| china    | chicken anemia virus                                | Virus    | no  | no  | no  |
| colombia | clostridium butyricum                               | Bacteria | yes | no  | no  |
| colombia | epicoccum nigrum                                    | Fungi    | no  | no  | no  |
| colombia | aspergillus versicolor                              | Fungi    | yes | no  | no  |
| colombia | bacillus megaterium                                 | Bacteria | no  | no  | no  |
| colombia | aspergillus flavus                                  | Fungi    | no  | no  | no  |
| colombia | eastern equine encephalitis virus                   | Virus    | yes | yes | yes |
| colombia | leishmania guyanensis                               | Protozoa | yes | yes | no  |
| colombia | cladosporium cladosporioides                        | Fungi    | yes | no  | no  |
| colombia | staphylococcus aureus                               | Bacteria | yes | yes | yes |
| colombia | klebsiella pneumoniae                               | Bacteria | yes | yes | yes |
| colombia | mycobacterium tuberculosis                          | Bacteria | yes | yes | yes |
| colombia | trypanosoma rangeli                                 | Protozoa | no  | no  | no  |
| colombia | leptospira interrogans                              | Bacteria | yes | yes | yes |
| colombia | cryptococcus gattii                                 | Fungi    | no  | no  | no  |
| colombia | primate t-lymphotropic virus 1                      | Virus    | no  | no  | no  |
| colombia | vesicular stomatitis new jersey virus               | Virus    | no  | no  | no  |
| colombia | fusarium solani                                     | Fungi    | yes | yes | yes |
| colombia | cryptococcus neoformans                             | Fungi    | yes | yes | yes |
| colombia | lysiniibacillus sphaericus                          | Bacteria | no  | no  | no  |
| colombia | porcine reproductive and respiratory syndrome virus | Virus    | no  | no  | no  |
| colombia | trichoderma atroviride                              | Fungi    | no  | no  | no  |
| colombia | rotavirus c                                         | Virus    | yes | yes | yes |
| colombia | measles virus                                       | Virus    | yes | yes | yes |



|          |                                      |          |     |     |     |
|----------|--------------------------------------|----------|-----|-----|-----|
| colombia | wyeomyia virus                       | Virus    | yes | yes | no  |
| colombia | hepatitis b virus                    | Virus    | yes | no  | yes |
| colombia | hepatitis c virus                    | Virus    | yes | no  | yes |
| colombia | venezuelan equine encephalitis virus | Virus    | yes | yes | yes |
| colombia | aeromonas hydrophila                 | Bacteria | yes | yes | yes |
| colombia | vibrio campbellii                    | Bacteria | no  | no  | no  |
| colombia | dengue virus                         | Virus    | no  | no  | no  |
| colombia | influenza a virus                    | Virus    | yes | yes | yes |
| colombia | trichoderma longibrachiatum          | Fungi    | no  | no  | no  |
| colombia | fonsecaea pedrosoi                   | Fungi    | no  | no  | no  |
| colombia | human enterovirus c                  | Virus    | yes | no  | no  |
| colombia | plasmodium falciparum                | Protozoa | yes | no  | yes |
| colombia | acinetobacter baumannii              | Bacteria | yes | no  | no  |
| colombia | sporothrix schenckii                 | Fungi    | yes | yes | no  |
| colombia | schizophyllum commune                | Fungi    | yes | no  | no  |
| colombia | bacillus thuringiensis               | Bacteria | yes | no  | no  |
| colombia | helicobacter pylori                  | Bacteria | yes | yes | no  |
| colombia | foot-and-mouth disease virus         | Virus    | no  | no  | no  |
| colombia | classical swine fever virus          | Virus    | no  | no  | no  |
| colombia | aspergillus tamaraii                 | Fungi    | no  | no  | no  |
| colombia | echinococcus vogeli                  | Helminth | yes | yes | no  |
| colombia | cryptosporidium felis                | Protozoa | no  | no  | no  |
| colombia | human astrovirus                     | Virus    | yes | no  | yes |
| colombia | leishmania panamensis                | Protozoa | yes | yes | no  |
| colombia | gibberella intermedia                | Fungi    | no  | no  | no  |
| colombia | fusarium oxysporum                   | Fungi    | yes | no  | yes |
| colombia | taenia solium                        | Helminth | yes | no  | yes |
| colombia | escherichia coli                     | Bacteria | yes | yes | yes |
| colombia | salmonella enterica                  | Bacteria | no  | no  | no  |
| colombia | trypanosoma cruzi                    | Protozoa | yes | yes | yes |
| colombia | chikungunya virus                    | Virus    | yes | yes | yes |
| colombia | shewanella algae                     | Bacteria | no  | no  | no  |
| colombia | human immunodeficiency virus 1       | Virus    | yes | no  | yes |
| colombia | ajellomyces capsulatus               | Fungi    | no  | no  | no  |
| colombia | ochrobactrum pseudogrignonense       | Bacteria | no  | no  | no  |
| colombia | thelazia callipaeda                  | Helminth | yes | yes | no  |
| colombia | avian coronavirus                    | Virus    | no  | no  | no  |
| colombia | newcastle disease virus              | Virus    | yes | yes | no  |
| colombia | stenotrophomonas maltophilia         | Bacteria | no  | no  | no  |
| colombia | gibberella moniliformis              | Fungi    | no  | no  | no  |
| colombia | chaetomium globosum                  | Fungi    | yes | no  | no  |
| colombia | human herpesvirus 3                  | Virus    | no  | no  | no  |
| colombia | pseudomonas stutzeri                 | Bacteria | yes | no  | no  |
| colombia | aspergillus sydowii                  | Fungi    | no  | no  | no  |
| colombia | bacillus subtilis                    | Bacteria | yes | yes | no  |
| colombia | plasmodium vivax                     | Protozoa | yes | no  | yes |
| colombia | vibrio harveyi                       | Bacteria | no  | no  | no  |
| colombia | aspergillus niger                    | Fungi    | yes | yes | no  |
| colombia | cordyceps bassiana                   | Fungi    | no  | no  | no  |
| colombia | aspergillus terreus                  | Fungi    | no  | no  | no  |

|              |                                       |          |     |     |     |
|--------------|---------------------------------------|----------|-----|-----|-----|
| colombia     | human respiratory syncytial virus     | Virus    | yes | no  | no  |
| colombia     | rabies virus                          | Virus    | yes | yes | yes |
| colombia     | bacillus firmus                       | Bacteria | no  | no  | no  |
| colombia     | norwalk virus                         | Virus    | yes | no  | yes |
| colombia     | ophiostoma stenoceras                 | Fungi    | no  | no  | no  |
| colombia     | alteromonas macleodii                 | Bacteria | no  | no  | no  |
| colombia     | vibrio alginolyticus                  | Bacteria | yes | yes | no  |
| colombia     | leishmania braziliensis               | Protozoa | yes | yes | no  |
| colombia     | human immunodeficiency virus 2        | Virus    | yes | no  | yes |
| colombia     | aspergillus ochraceus                 | Fungi    | no  | no  | no  |
| colombia     | yellow fever virus                    | Virus    | yes | yes | yes |
| colombia     | botryosphaeria dothidea               | Fungi    | no  | no  | no  |
| comoros      | chikungunya virus                     | Virus    | yes | yes | yes |
| comoros      | fusobacterium nucleatum               | Bacteria | yes | yes | no  |
| comoros      | plasmodium falciparum                 | Protozoa | yes | no  | yes |
| comoros      | fusarium solani                       | Fungi    | yes | yes | yes |
| cook islands | dengue virus                          | Virus    | no  | no  | no  |
| costa rica   | fonsecaea pedrosoi                    | Fungi    | no  | no  | no  |
| costa rica   | cryptococcus gattii                   | Fungi    | no  | no  | no  |
| costa rica   | paracoccidioides brasiliensis         | Fungi    | yes | yes | no  |
| costa rica   | human papillomavirus 18               | Virus    | no  | no  | no  |
| costa rica   | influenza a virus                     | Virus    | yes | yes | yes |
| costa rica   | fusarium solani                       | Fungi    | yes | yes | yes |
| costa rica   | sporothrix schenckii                  | Fungi    | yes | yes | no  |
| costa rica   | langeronia macrocirra                 | Helminth | no  | no  | no  |
| costa rica   | hepatitis b virus                     | Virus    | yes | no  | yes |
| costa rica   | avian leukosis virus                  | Virus    | no  | no  | no  |
| costa rica   | human immunodeficiency virus 1        | Virus    | yes | no  | yes |
| costa rica   | schizophyllum commune                 | Fungi    | yes | no  | no  |
| costa rica   | cordyceps bassiana                    | Fungi    | no  | no  | no  |
| costa rica   | bluetongue virus                      | Virus    | no  | no  | no  |
| costa rica   | human enterovirus b                   | Virus    | yes | no  | yes |
| costa rica   | vesicular stomatitis new jersey virus | Virus    | no  | no  | no  |
| costa rica   | crassicutis cichlasomae               | Helminth | no  | no  | no  |
| costa rica   | pseudomonas aeruginosa                | Bacteria | yes | yes | yes |
| costa rica   | hepatitis c virus                     | Virus    | yes | no  | yes |
| costa rica   | leuconostoc pseudomesenteroides       | Bacteria | no  | no  | no  |
| costa rica   | haematoloechus floedae                | Helminth | no  | no  | no  |
| costa rica   | arthroderma otae                      | Fungi    | no  | no  | no  |
| costa rica   | pseudosonsinotrema chabaudi           | Helminth | no  | no  | no  |
| costa rica   | severe acute respiratory syndrome-rel | Virus    | no  | no  | no  |
| costa rica   | rickettsia felis                      | Bacteria | yes | yes | no  |
| costa rica   | dengue virus                          | Virus    | no  | no  | no  |
| costa rica   | chelonid herpesvirus 5                | Virus    | no  | no  | no  |
| costa rica   | fusarium oxysporum                    | Fungi    | yes | no  | yes |
| costa rica   | angiostrongylus costaricensis         | Helminth | no  | no  | no  |
| costa rica   | lactobacillus johnsonii               | Bacteria | no  | no  | no  |
| costa rica   | nocardia beijingensis                 | Bacteria | no  | no  | no  |
| costa rica   | listeria monocytogenes                | Bacteria | yes | yes | yes |
| costa rica   | cryptococcus neoformans               | Fungi    | yes | yes | yes |

|            |                                         |          |     |     |     |
|------------|-----------------------------------------|----------|-----|-----|-----|
| costa rica | human papillomavirus 16                 | Virus    | no  | no  | no  |
| costa rica | bovine leukemia virus                   | Virus    | no  | no  | no  |
| costa rica | haematoloechus meridionalis             | Helminth | no  | no  | no  |
| costa rica | human papillomavirus 61                 | Virus    | no  | no  | no  |
| costa rica | helicobacter pylori                     | Bacteria | yes | yes | no  |
| croatia    | kytocooccus sedentarius                 | Bacteria | no  | no  | no  |
| croatia    | fascioloides magna                      | Helminth | no  | no  | no  |
| croatia    | babesia canis                           | Protozoa | no  | no  | no  |
| croatia    | bacillus subtilis                       | Bacteria | yes | yes | no  |
| croatia    | clinostomum complanatum                 | Helminth | no  | no  | no  |
| croatia    | human immunodeficiency virus 1          | Virus    | yes | no  | yes |
| croatia    | avian orthoreovirus                     | Virus    | no  | no  | no  |
| croatia    | human immunodeficiency virus 2          | Virus    | yes | no  | yes |
| croatia    | neisseria meningitidis                  | Bacteria | yes | no  | yes |
| croatia    | bacillus licheniformis                  | Bacteria | yes | yes | no  |
| croatia    | tula virus                              | Virus    | no  | no  | no  |
| croatia    | human enterovirus b                     | Virus    | yes | no  | yes |
| croatia    | measles virus                           | Virus    | yes | yes | yes |
| croatia    | atractolytocestus huronensis            | Helminth | no  | no  | no  |
| croatia    | giardia intestinalis                    | Protozoa | no  | no  | no  |
| croatia    | pseudomonas aeruginosa                  | Bacteria | yes | yes | yes |
| croatia    | bovine herpesvirus 1                    | Virus    | no  | no  | no  |
| croatia    | human enterovirus a                     | Virus    | yes | no  | no  |
| croatia    | dengue virus                            | Virus    | no  | no  | no  |
| croatia    | klebsiella pneumoniae                   | Bacteria | yes | yes | yes |
| croatia    | giardia muris                           | Protozoa | no  | no  | no  |
| croatia    | sandfly fever naples virus              | Virus    | yes | yes | yes |
| croatia    | escherichia coli                        | Bacteria | yes | yes | yes |
| croatia    | skrjabinotaenia lobata                  | Helminth | no  | no  | no  |
| croatia    | catenotaenia henttoneni                 | Helminth | no  | no  | no  |
| croatia    | human metapneumovirus                   | Virus    | no  | no  | no  |
| croatia    | sinorhizobium medicae                   | Bacteria | no  | no  | no  |
| croatia    | pseudomonas putida                      | Bacteria | yes | no  | no  |
| croatia    | trypanosoma theileri                    | Protozoa | no  | no  | no  |
| croatia    | pantoea agglomerans                     | Bacteria | yes | yes | no  |
| croatia    | streptococcus pneumoniae                | Bacteria | yes | yes | yes |
| croatia    | pseudomonas stutzeri                    | Bacteria | yes | no  | no  |
| croatia    | classical swine fever virus             | Virus    | no  | no  | no  |
| croatia    | bovine leukemia virus                   | Virus    | no  | no  | no  |
| croatia    | microbacterium testaceum                | Bacteria | no  | no  | no  |
| croatia    | hepatitis e virus                       | Virus    | yes | yes | yes |
| croatia    | human parechovirus                      | Virus    | no  | no  | no  |
| croatia    | influenza a virus                       | Virus    | yes | yes | yes |
| croatia    | chicken astrovirus                      | Virus    | no  | no  | no  |
| croatia    | vibrio splendidus                       | Bacteria | no  | no  | no  |
| croatia    | cowpox virus                            | Virus    | yes | yes | no  |
| croatia    | rabies virus                            | Virus    | yes | yes | yes |
| croatia    | puumala virus                           | Virus    | yes | yes | yes |
| croatia    | infectious hematopoietic necrosis virus | Virus    | no  | no  | no  |
| croatia    | staphylococcus epidermidis              | Bacteria | yes | yes | yes |

|         |                                  |          |     |     |     |
|---------|----------------------------------|----------|-----|-----|-----|
| croatia | dobrava-belgrade virus           | Virus    | yes | yes | no  |
| croatia | bacillus clausii                 | Bacteria | no  | no  | no  |
| croatia | bacillus pumilus                 | Bacteria | yes | no  | no  |
| croatia | trichuris muris                  | Helminth | no  | no  | no  |
| croatia | turkey astrovirus                | Virus    | no  | no  | no  |
| croatia | hepatozoon canis                 | Protozoa | no  | no  | no  |
| croatia | anoplocephaloides dentata        | Helminth | no  | no  | no  |
| croatia | mumps virus                      | Virus    | yes | no  | no  |
| cuba    | equine infectious anemia virus   | Virus    | no  | no  | no  |
| cuba    | hepatitis b virus                | Virus    | yes | no  | yes |
| cuba    | human rhinovirus a               | Virus    | yes | no  | no  |
| cuba    | human enterovirus c              | Virus    | yes | no  | no  |
| cuba    | escherichia coli                 | Bacteria | yes | yes | yes |
| cuba    | human herpesvirus 8              | Virus    | yes | no  | yes |
| cuba    | dengue virus                     | Virus    | no  | no  | no  |
| cuba    | rotavirus a                      | Virus    | yes | yes | yes |
| cuba    | hepatitis e virus                | Virus    | yes | yes | yes |
| cuba    | agrobacterium tumefaciens        | Bacteria | no  | no  | no  |
| cuba    | human immunodeficiency virus 2   | Virus    | yes | no  | yes |
| cuba    | leuconostoc citreum              | Bacteria | no  | no  | no  |
| cuba    | fusarium solani                  | Fungi    | yes | yes | yes |
| cuba    | hepatitis c virus                | Virus    | yes | no  | yes |
| cuba    | streptococcus suis               | Bacteria | yes | yes | no  |
| cuba    | human enterovirus b              | Virus    | yes | no  | yes |
| cuba    | influenza a virus                | Virus    | yes | yes | yes |
| cuba    | neisseria meningitidis           | Bacteria | yes | no  | yes |
| cuba    | rabbit hemorrhagic disease virus | Virus    | no  | no  | no  |
| cuba    | mycobacterium tuberculosis       | Bacteria | yes | yes | yes |
| cuba    | pseudomonas putida               | Bacteria | yes | no  | no  |
| cuba    | infectious bursal disease virus  | Virus    | no  | no  | no  |
| cuba    | human immunodeficiency virus 1   | Virus    | yes | no  | yes |
| cuba    | anaplasma marginale              | Bacteria | no  | no  | no  |
| cuba    | classical swine fever virus      | Virus    | no  | no  | no  |
| cuba    | bovine herpesvirus 5             | Virus    | no  | no  | no  |
| cuba    | hepatitis a virus                | Virus    | yes | yes | yes |
| cuba    | fasciola hepatica                | Helminth | yes | yes | no  |
| cuba    | human rhinovirus c               | Virus    | no  | no  | no  |
| cuba    | giardia intestinalis             | Protozoa | no  | no  | no  |
| cuba    | cordyceps bassiana               | Fungi    | no  | no  | no  |
| cuba    | vibrio parahaemolyticus          | Bacteria | yes | yes | yes |
| cuba    | vibrio alginolyticus             | Bacteria | yes | yes | no  |
| cuba    | mycobacterium simiae             | Bacteria | yes | yes | no  |
| cuba    | rabies virus                     | Virus    | yes | yes | yes |
| curacao | dengue virus                     | Virus    | no  | no  | no  |
| curacao | human immunodeficiency virus 1   | Virus    | yes | no  | yes |
| cyprus  | brucella melitensis              | Bacteria | yes | yes | yes |
| cyprus  | schizophyllum commune            | Fungi    | yes | no  | no  |
| cyprus  | sandfly fever naples virus       | Virus    | yes | yes | yes |
| cyprus  | capnocytophaga granulosa         | Bacteria | no  | no  | no  |
| cyprus  | cryptosporidium parvum           | Protozoa | yes | yes | yes |

|                |                                |          |     |     |     |
|----------------|--------------------------------|----------|-----|-----|-----|
| cyprus         | streptococcus pneumoniae       | Bacteria | yes | yes | yes |
| cyprus         | human enterovirus a            | Virus    | yes | no  | no  |
| cyprus         | human papillomavirus 26        | Virus    | no  | no  | no  |
| cyprus         | anaplasma phagocytophilum      | Bacteria | no  | no  | no  |
| cyprus         | hepatitis c virus              | Virus    | yes | no  | yes |
| cyprus         | human enterovirus c            | Virus    | yes | no  | no  |
| cyprus         | echinococcus granulosus        | Helminth | yes | yes | yes |
| cyprus         | human immunodeficiency virus 1 | Virus    | yes | no  | yes |
| cyprus         | human papillomavirus 18        | Virus    | no  | no  | no  |
| cyprus         | teladorsagia circumcincta      | Helminth | yes | yes | no  |
| cyprus         | rickettsia helvetica           | Bacteria | yes | no  | no  |
| cyprus         | scrapie agent                  | Others   | no  | no  | no  |
| cyprus         | human papillomavirus 16        | Virus    | no  | no  | no  |
| cyprus         | mycobacterium avium            | Bacteria | yes | yes | yes |
| cyprus         | anaplasma ovis                 | Bacteria | no  | no  | no  |
| cyprus         | rickettsia massiliae           | Bacteria | yes | yes | no  |
| cyprus         | west nile virus                | Virus    | yes | yes | yes |
| cyprus         | human enterovirus b            | Virus    | yes | no  | yes |
| cyprus         | fusarium solani                | Fungi    | yes | yes | yes |
| cyprus         | human immunodeficiency virus 2 | Virus    | yes | no  | yes |
| cyprus         | anaplasma platys               | Bacteria | no  | no  | no  |
| cyprus         | entamoeba coli                 | Protozoa | no  | no  | no  |
| cyprus         | leishmania infantum            | Protozoa | yes | yes | yes |
| cyprus         | leishmania donovani            | Protozoa | yes | yes | yes |
| cyprus         | cryptosporidium hominis        | Protozoa | yes | no  | yes |
| cyprus         | coxiella burnetii              | Bacteria | yes | yes | no  |
| cyprus         | bluetongue virus               | Virus    | no  | no  | no  |
| cyprus         | encephalomyocarditis virus     | Virus    | yes | yes | no  |
| czech republic | mucor hiemalis                 | Fungi    | yes | no  | no  |
| czech republic | aspergillus insuetus           | Fungi    | no  | no  | no  |
| czech republic | gyrodactylus kobayashii        | Helminth | no  | no  | no  |
| czech republic | citrobacter freundii           | Bacteria | yes | yes | no  |
| czech republic | gyrodactylus katharineri       | Helminth | no  | no  | no  |
| czech republic | dobrava-belgrade virus         | Virus    | yes | yes | no  |
| czech republic | butyrivibrio fibrisolvens      | Bacteria | no  | no  | no  |
| czech republic | aspergillus tubingensis        | Fungi    | no  | no  | no  |
| czech republic | measles virus                  | Virus    | yes | yes | yes |
| czech republic | pseudomonas fluorescens        | Bacteria | yes | no  | no  |
| czech republic | gyrodactylus laevis            | Helminth | no  | no  | no  |
| czech republic | eimeria exigua                 | Protozoa | no  | no  | no  |
| czech republic | gyrodactylus hronosus          | Helminth | no  | no  | no  |
| czech republic | eurotium amstelodami           | Fungi    | no  | no  | no  |
| czech republic | acinetobacter ursingii         | Bacteria | no  | no  | no  |
| czech republic | gyrodactylus lotae             | Helminth | no  | no  | no  |
| czech republic | trichobilharzia franki         | Helminth | no  | no  | no  |
| czech republic | leucochloridium perturbatum    | Helminth | no  | no  | no  |
| czech republic | gyrodactylus papernai          | Helminth | no  | no  | no  |
| czech republic | trichobilharzia regenti        | Helminth | no  | no  | no  |
| czech republic | colletotrichum dematium        | Fungi    | yes | no  | no  |
| czech republic | eimeria flavescens             | Protozoa | no  | no  | no  |

|                |                                        |          |     |     |     |
|----------------|----------------------------------------|----------|-----|-----|-----|
| czech republic | eimeria irresidua                      | Protozoa | no  | no  | no  |
| czech republic | cryptosporidium baileyi                | Protozoa | no  | no  | no  |
| czech republic | rabies virus                           | Virus    | yes | yes | yes |
| czech republic | gyrodactylus lomi                      | Helminth | no  | no  | no  |
| czech republic | gyrodactylus gurleyi                   | Helminth | no  | no  | no  |
| czech republic | aspergillus carbonarius                | Fungi    | no  | no  | no  |
| czech republic | borrelia valaisiana                    | Bacteria | no  | no  | no  |
| czech republic | enterocytozoon bieneusi                | Fungi    | yes | no  | yes |
| czech republic | cryptosporidium felis                  | Protozoa | no  | no  | no  |
| czech republic | brachylecithum lobatum                 | Helminth | no  | no  | no  |
| czech republic | microbacterium oxydans                 | Bacteria | no  | no  | no  |
| czech republic | trypanosoma avium                      | Protozoa | no  | no  | no  |
| czech republic | aspergillus lentulus                   | Fungi    | no  | no  | no  |
| czech republic | streptococcus sanguinis                | Bacteria | yes | no  | no  |
| czech republic | urocleidus similis                     | Helminth | no  | no  | no  |
| czech republic | hepatitis c virus                      | Virus    | yes | no  | yes |
| czech republic | naegleria clarki                       | Protozoa | no  | no  | no  |
| czech republic | dactylogyrus anchoratus                | Helminth | no  | no  | no  |
| czech republic | encyclometra colubrimurorum            | Helminth | no  | no  | no  |
| czech republic | epicoccum nigrum                       | Fungi    | no  | no  | no  |
| czech republic | bovine respiratory syncytial virus     | Virus    | no  | no  | no  |
| czech republic | aspergillus versicolor                 | Fungi    | yes | no  | no  |
| czech republic | aspergillus viridinutans               | Fungi    | no  | no  | no  |
| czech republic | spring viraemia of carp virus          | Virus    | no  | no  | no  |
| czech republic | eimeria perforans                      | Protozoa | no  | no  | no  |
| czech republic | aspergillus tritici                    | Fungi    | no  | no  | no  |
| czech republic | rhodococcus erythropolis               | Bacteria | yes | no  | no  |
| czech republic | porcine reproductive and respiratory s | Virus    | no  | no  | no  |
| czech republic | mycobacterium tuberculosis             | Bacteria | yes | yes | yes |
| czech republic | pseudomonas chlororaphis               | Bacteria | no  | no  | no  |
| czech republic | schizophyllum commune                  | Fungi    | yes | no  | no  |
| czech republic | cryptosporidium muris                  | Protozoa | no  | no  | no  |
| czech republic | aspergillus wentii                     | Fungi    | yes | no  | no  |
| czech republic | gyrodactylus elegans                   | Helminth | no  | no  | no  |
| czech republic | aspergillus candidus                   | Fungi    | yes | no  | no  |
| czech republic | arthrobacter oxydans                   | Bacteria | no  | no  | no  |
| czech republic | balantidium coli                       | Protozoa | yes | yes | no  |
| czech republic | troglydoteila abressarti               | Protozoa | no  | no  | no  |
| czech republic | burkholderia fungorum                  | Bacteria | no  | no  | no  |
| czech republic | newcastle disease virus                | Virus    | yes | yes | no  |
| czech republic | eudiplozoon nipponicum                 | Helminth | no  | no  | no  |
| czech republic | cryptosporidium parvum                 | Protozoa | yes | yes | yes |
| czech republic | gyrodactylus sedelnikowi               | Helminth | no  | no  | no  |
| czech republic | dactylogyrus cryptomeres               | Helminth | no  | no  | no  |
| czech republic | trichobilharzia szidati                | Helminth | no  | no  | no  |
| czech republic | hepatitis b virus                      | Virus    | yes | no  | yes |
| czech republic | lyperosomum collurionis                | Helminth | no  | no  | no  |
| czech republic | hammondia heydorni                     | Protozoa | no  | no  | no  |
| czech republic | gyrodactylus thymalli                  | Helminth | no  | no  | no  |
| czech republic | neosartorya glabra                     | Fungi    | no  | no  | no  |

|                |                                |          |     |     |     |
|----------------|--------------------------------|----------|-----|-----|-----|
| czech republic | gyrodactylus barbi             | Helminth | no  | no  | no  |
| czech republic | human enterovirus b            | Virus    | yes | no  | yes |
| czech republic | bacillus licheniformis         | Bacteria | yes | yes | no  |
| czech republic | penicillium polonicum          | Fungi    | no  | no  | no  |
| czech republic | chaetomium globosum            | Fungi    | yes | no  | no  |
| czech republic | gyrodactylus cernuae           | Helminth | no  | no  | no  |
| czech republic | fascioloides magna             | Helminth | no  | no  | no  |
| czech republic | dactylogyrus extensus          | Helminth | no  | no  | no  |
| czech republic | gyrodactylus teuchis           | Helminth | no  | no  | no  |
| czech republic | enterobacter cloacae           | Bacteria | yes | yes | no  |
| czech republic | escherichia coli               | Bacteria | yes | yes | yes |
| czech republic | gyrodactylus markakulensis     | Helminth | no  | no  | no  |
| czech republic | tick-borne encephalitis virus  | Virus    | no  | no  | no  |
| czech republic | bothriocephalus acheilognathi  | Helminth | no  | no  | no  |
| czech republic | mycobacterium bovis            | Bacteria | yes | yes | yes |
| czech republic | cryptosporidium galli          | Protozoa | no  | no  | no  |
| czech republic | acinetobacter parvus           | Bacteria | no  | no  | no  |
| czech republic | west nile virus                | Virus    | yes | yes | yes |
| czech republic | pseudobutyrvibrio xylanivorans | Bacteria | no  | no  | no  |
| czech republic | dactylogyrus difformis         | Helminth | no  | no  | no  |
| czech republic | aspergillus ochraceus          | Fungi    | no  | no  | no  |
| czech republic | chaetomium brasiliense         | Fungi    | no  | no  | no  |
| czech republic | achromobacter xylosoxidans     | Bacteria | yes | no  | no  |
| czech republic | aspergillus calidoustus        | Fungi    | no  | no  | no  |
| czech republic | gyrodactylus fossilis          | Helminth | no  | no  | no  |
| czech republic | gyrodactylus luciopercae       | Helminth | no  | no  | no  |
| czech republic | cleidodiscus pricei            | Helminth | no  | no  | no  |
| czech republic | emericella rugulosa            | Fungi    | no  | no  | no  |
| czech republic | california encephalitis virus  | Virus    | yes | yes | yes |
| czech republic | debaryomyces hansenii          | Fungi    | no  | no  | no  |
| czech republic | bifidobacterium thermophilum   | Bacteria | no  | no  | no  |
| czech republic | brucella microti               | Bacteria | no  | no  | no  |
| czech republic | gyrodactylus carassii          | Helminth | no  | no  | no  |
| czech republic | bifidobacterium animalis       | Bacteria | no  | no  | no  |
| czech republic | borrelia spielmanii            | Bacteria | no  | no  | no  |
| czech republic | petasiger phalacrocoracis      | Helminth | no  | no  | no  |
| czech republic | pseudallescheria boydii        | Fungi    | no  | no  | no  |
| czech republic | cryptosporidium meleagridis    | Protozoa | no  | no  | no  |
| czech republic | mycobacterium avium            | Bacteria | yes | yes | yes |
| czech republic | aspergillus sydowii            | Fungi    | no  | no  | no  |
| czech republic | emericella nidulans            | Fungi    | no  | no  | no  |
| czech republic | pseudobutyrvibrio ruminis      | Bacteria | no  | no  | no  |
| czech republic | gyrodactylus gracilihamatus    | Helminth | no  | no  | no  |
| czech republic | influenza a virus              | Virus    | yes | yes | yes |
| czech republic | aspergillus terreus            | Fungi    | no  | no  | no  |
| czech republic | fusarium oxysporum             | Fungi    | yes | no  | yes |
| czech republic | dactylogyrus hemiamphibothrium | Helminth | no  | no  | no  |
| czech republic | dactylogyrus sphyrna           | Helminth | no  | no  | no  |
| czech republic | cryptosporidium suis           | Protozoa | no  | no  | no  |
| czech republic | nuclearia pattersoni           | Others   | no  | no  | no  |

|                |                              |          |     |     |     |
|----------------|------------------------------|----------|-----|-----|-----|
| czech republic | hepatitis e virus            | Virus    | yes | yes | yes |
| czech republic | candida tropicalis           | Fungi    | yes | yes | no  |
| czech republic | cryptosporidium cuniculus    | Protozoa | yes | yes | no  |
| czech republic | dactylogyrus lamellatus      | Helminth | no  | no  | no  |
| czech republic | legionella anisa             | Bacteria | yes | no  | no  |
| czech republic | aspergillus persii           | Fungi    | no  | no  | no  |
| czech republic | goussia janae                | Protozoa | no  | no  | no  |
| czech republic | pseudomonas aeruginosa       | Bacteria | yes | yes | yes |
| czech republic | gyrodactylus aphyae          | Helminth | no  | no  | no  |
| czech republic | borrelia burgdorferi         | Bacteria | yes | yes | yes |
| czech republic | gyrodactylus rutilensis      | Helminth | no  | no  | no  |
| czech republic | ligula colymbi               | Helminth | no  | no  | no  |
| czech republic | ligula intestinalis          | Helminth | yes | yes | no  |
| czech republic | gyrodactylus longoacuminatus | Helminth | no  | no  | no  |
| czech republic | penicillium purpurogenum     | Fungi    | yes | no  | no  |
| czech republic | alternaria alternata         | Fungi    | yes | yes | no  |
| czech republic | aspergillus fumigatus        | Fungi    | no  | no  | no  |
| czech republic | thottapalayam virus          | Virus    | no  | no  | no  |
| czech republic | hyaloklossia lieberkuehni    | Protozoa | no  | no  | no  |
| czech republic | bifidobacterium longum       | Bacteria | no  | no  | no  |
| czech republic | borrelia afzelii             | Bacteria | no  | no  | no  |
| czech republic | aspergillus niger            | Fungi    | yes | yes | no  |
| czech republic | aspergillus awamori          | Fungi    | no  | no  | no  |
| czech republic | eimeria stiedai              | Protozoa | no  | no  | no  |
| czech republic | phaeoacremonium rubrigenum   | Fungi    | no  | no  | no  |
| czech republic | stenotrophomonas maltophilia | Bacteria | no  | no  | no  |
| czech republic | thaparocleidus siluri        | Helminth | no  | no  | no  |
| czech republic | aspergillus westerdijkiae    | Fungi    | no  | no  | no  |
| czech republic | eimeria media                | Protozoa | no  | no  | no  |
| czech republic | neosartorya hiratsukae       | Fungi    | no  | no  | no  |
| czech republic | aspergillus flavipes         | Fungi    | yes | no  | no  |
| czech republic | oslerus osleri               | Helminth | no  | no  | no  |
| czech republic | aspergillus unguis           | Fungi    | no  | no  | no  |
| czech republic | torque teno sus virus 1      | Virus    | no  | no  | no  |
| czech republic | cordyceps bassiana           | Fungi    | no  | no  | no  |
| czech republic | aspergillus penicillioides   | Fungi    | no  | no  | no  |
| czech republic | classical swine fever virus  | Virus    | no  | no  | no  |
| czech republic | clostridium perfringens      | Bacteria | yes | yes | no  |
| czech republic | cladosporium cladosporioides | Fungi    | yes | no  | no  |
| czech republic | giardia intestinalis         | Protozoa | no  | no  | no  |
| czech republic | penicillium citrinum         | Fungi    | yes | no  | no  |
| czech republic | aspergillus clavatus         | Fungi    | yes | no  | no  |
| czech republic | encephalitozoon cuniculi     | Fungi    | yes | yes | yes |
| czech republic | mycobacterium fortuitum      | Bacteria | no  | no  | no  |
| czech republic | glanitaenia osculata         | Helminth | no  | no  | no  |
| czech republic | thaparocleidus vistulensis   | Helminth | no  | no  | no  |
| czech republic | aspergillus flavus           | Fungi    | no  | no  | no  |
| czech republic | equid herpesvirus 1          | Virus    | no  | no  | no  |
| czech republic | tetraonchus monenteron       | Helminth | no  | no  | no  |
| czech republic | aspergillus kanagawaensis    | Fungi    | no  | no  | no  |



|                    |                                   |          |     |     |     |
|--------------------|-----------------------------------|----------|-----|-----|-----|
| czech republic     | <i>nocardia farcinica</i>         | Bacteria | yes | yes | no  |
| czech republic     | <i>penicillium griseofulvum</i>   | Fungi    | no  | no  | no  |
| czech republic     | <i>dactylogyrus inexpectatus</i>  | Helminth | no  | no  | no  |
| czech republic     | <i>dactylogyrus nanus</i>         | Helminth | no  | no  | no  |
| czech republic     | ectromelia virus                  | Virus    | no  | no  | no  |
| czech republic     | torque teno sus virus 2           | Virus    | no  | no  | no  |
| czech republic     | <i>eimeria piriformis</i>         | Protozoa | no  | no  | no  |
| czech republic     | <i>gyrodactylus macronychus</i>   | Helminth | no  | no  | no  |
| czech republic     | human immunodeficiency virus 1    | Virus    | yes | no  | yes |
| czech republic     | <i>anaplasma phagocytophilum</i>  | Bacteria | no  | no  | no  |
| czech republic     | <i>aspergillus tamaraii</i>       | Fungi    | no  | no  | no  |
| czech republic     | <i>actinomucor elegans</i>        | Fungi    | no  | no  | no  |
| czech republic     | <i>gyrodactylus truttae</i>       | Helminth | no  | no  | no  |
| czech republic     | <i>eimeria vej dovskyi</i>        | Protozoa | no  | no  | no  |
| czech republic     | bovine viral diarrhea virus 1     | Virus    | no  | no  | no  |
| czech republic     | <i>mucor circinelloides</i>       | Fungi    | yes | yes | no  |
| czech republic     | <i>gyrodactylus vimbi</i>         | Helminth | no  | no  | no  |
| czech republic     | <i>gyrodactylus rhodei</i>        | Helminth | no  | no  | no  |
| czech republic     | <i>butyrivibrio hungatei</i>      | Bacteria | no  | no  | no  |
| czech republic     | <i>borrelia americana</i>         | Bacteria | no  | no  | no  |
| czech republic     | <i>geomyces destructans</i>       | Fungi    | no  | no  | no  |
| czech republic     | <i>borrelia lusitaniae</i>        | Bacteria | no  | no  | no  |
| czech republic     | sapporo virus                     | Virus    | no  | no  | no  |
| czech republic     | <i>cryptosporidium andersoni</i>  | Protozoa | no  | no  | no  |
| czech republic     | <i>gyrodactylus gobiensis</i>     | Helminth | no  | no  | no  |
| czech republic     | <i>neospora caninum</i>           | Protozoa | no  | no  | no  |
| czech republic     | <i>penicillium corylophilum</i>   | Fungi    | no  | no  | no  |
| czech republic     | <i>eimeria coecicola</i>          | Protozoa | no  | no  | no  |
| czech republic     | <i>borrelia garinii</i>           | Bacteria | no  | no  | no  |
| czech republic     | <i>anguillicoloides crassus</i>   | Helminth | no  | no  | no  |
| democratic republi | <i>plasmodium yoelii</i>          | Protozoa | no  | no  | no  |
| democratic republi | primate t-lymphotropic virus 1    | Virus    | no  | no  | no  |
| democratic republi | <i>cryptococcus neoformans</i>    | Fungi    | yes | yes | yes |
| democratic republi | <i>mycobacterium tuberculosis</i> | Bacteria | yes | yes | yes |
| democratic republi | foot-and-mouth disease virus      | Virus    | no  | no  | no  |
| democratic republi | chikungunya virus                 | Virus    | yes | yes | yes |
| democratic republi | human enterovirus a               | Virus    | yes | no  | no  |
| democratic republi | <i>plasmodium falciparum</i>      | Protozoa | yes | no  | yes |
| democratic republi | human enterovirus c               | Virus    | yes | no  | no  |
| democratic republi | human enterovirus b               | Virus    | yes | no  | yes |
| democratic republi | <i>vibrio cholerae</i>            | Bacteria | yes | no  | yes |
| democratic republi | measles virus                     | Virus    | yes | yes | yes |
| democratic republi | <i>microsporium audouinii</i>     | Fungi    | yes | yes | no  |
| democratic republi | yellow fever virus                | Virus    | yes | yes | yes |
| democratic republi | hepatitis e virus                 | Virus    | yes | yes | yes |
| democratic republi | human herpesvirus 8               | Virus    | yes | no  | yes |
| democratic republi | african swine fever virus         | Virus    | no  | no  | no  |
| democratic republi | lake victoria marburgvirus        | Virus    | no  | no  | no  |
| democratic republi | <i>plasmodium reichenowi</i>      | Protozoa | no  | no  | no  |
| democratic republi | <i>schistosoma mansoni</i>        | Helminth | yes | yes | yes |

|                    |                                      |          |     |     |     |
|--------------------|--------------------------------------|----------|-----|-----|-----|
| democratic republi | pseudallescheria boydii              | Fungi    | no  | no  | no  |
| democratic republi | plasmodium berghei                   | Protozoa | no  | no  | no  |
| democratic republi | trichomonas vaginalis                | Protozoa | yes | no  | yes |
| democratic republi | mycobacterium ulcerans               | Bacteria | yes | yes | yes |
| democratic republi | human immunodeficiency virus 2       | Virus    | yes | no  | yes |
| democratic republi | human immunodeficiency virus 1       | Virus    | yes | no  | yes |
| democratic republi | rotavirus a                          | Virus    | yes | yes | yes |
| democratic republi | crimean-congo hemorrhagic fever viru | Virus    | no  | no  | no  |
| democratic republi | catenulostroma chromoblastomycosu    | Fungi    | no  | no  | no  |
| democratic republi | neisseria gonorrhoeae                | Bacteria | yes | no  | yes |
| democratic republi | xanthomonas campestris               | Bacteria | no  | no  | no  |
| democratic republi | hepatitis c virus                    | Virus    | yes | no  | yes |
| democratic republi | hepatitis delta virus                | Virus    | yes | no  | no  |
| democratic republi | yersinia pestis                      | Bacteria | yes | yes | yes |
| democratic republi | anaplasma platys                     | Bacteria | no  | no  | no  |
| democratic republi | trypanosoma brucei                   | Protozoa | yes | yes | yes |
| democratic republi | human enterovirus d                  | Virus    | yes | no  | no  |
| democratic republi | encephalomyocarditis virus           | Virus    | yes | yes | no  |
| democratic republi | monkeypox virus                      | Virus    | yes | yes | yes |
| democratic republi | shigella dysenteriae                 | Bacteria | yes | yes | yes |
| democratic republi | rabies virus                         | Virus    | yes | yes | yes |
| democratic republi | human herpesvirus 6                  | Virus    | yes | no  | no  |
| democratic republi | west nile virus                      | Virus    | yes | yes | yes |
| democratic republi | plasmodium vinckei                   | Protozoa | no  | no  | no  |
| democratic republi | aspergillus ochraceus                | Fungi    | no  | no  | no  |
| democratic republi | simian immunodeficiency virus        | Virus    | no  | no  | no  |
| democratic republi | haemonchus contortus                 | Helminth | yes | yes | no  |
| democratic republi | variola virus                        | Virus    | no  | no  | no  |
| democratic republi | hepatitis b virus                    | Virus    | yes | no  | yes |
| democratic republi | plasmodium atheruri                  | Protozoa | no  | no  | no  |
| democratic republi | schistosoma intercalatum             | Helminth | yes | yes | no  |
| democratic republi | zaire ebolavirus                     | Virus    | yes | yes | yes |
| democratic republi | entamoeba histolytica                | Protozoa | yes | yes | no  |
| denmark            | lactococcus lactis                   | Bacteria | no  | no  | no  |
| denmark            | plectosphaerella cucumerina          | Fungi    | no  | no  | no  |
| denmark            | enterococcus casseliflavus           | Bacteria | yes | no  | no  |
| denmark            | measles virus                        | Virus    | yes | yes | yes |
| denmark            | newcastle disease virus              | Virus    | yes | yes | no  |
| denmark            | norwalk virus                        | Virus    | yes | no  | yes |
| denmark            | human enterovirus b                  | Virus    | yes | no  | yes |
| denmark            | staphylococcus capitis               | Bacteria | no  | no  | no  |
| denmark            | mumps virus                          | Virus    | yes | no  | no  |
| denmark            | european bat lyssavirus 1            | Virus    | yes | yes | no  |
| denmark            | pasteurella multocida                | Bacteria | yes | yes | no  |
| denmark            | mycobacterium marinum                | Bacteria | yes | yes | yes |
| denmark            | haemophilus parainfluenzae           | Bacteria | yes | no  | no  |
| denmark            | oesophagostomum quadrispinulatum     | Helminth | no  | no  | no  |
| denmark            | gyrodactylus derjavini               | Helminth | no  | no  | no  |
| denmark            | avibacterium volantium               | Bacteria | no  | no  | no  |
| denmark            | pseudomonas aeruginosa               | Bacteria | yes | yes | yes |

|         |                                        |          |     |     |     |
|---------|----------------------------------------|----------|-----|-----|-----|
| denmark | dobraiva-belgrade virus                | Virus    | yes | yes | no  |
| denmark | porcine reproductive and respiratory s | Virus    | no  | no  | no  |
| denmark | flavobacterium psychrophilum           | Bacteria | no  | no  | no  |
| denmark | angiostrongylus vasorum                | Helminth | no  | no  | no  |
| denmark | bacteroides vulgatus                   | Bacteria | yes | no  | no  |
| denmark | enterococcus avium                     | Bacteria | yes | yes | no  |
| denmark | leptospira interrogans                 | Bacteria | yes | yes | yes |
| denmark | borrelia spielmanii                    | Bacteria | no  | no  | no  |
| denmark | cryptosporidium parvum                 | Protozoa | yes | yes | yes |
| denmark | infectious bursal disease virus        | Virus    | no  | no  | no  |
| denmark | borrelia afzelii                       | Bacteria | no  | no  | no  |
| denmark | chlamydia trachomatis                  | Bacteria | yes | yes | yes |
| denmark | human immunodeficiency virus 2         | Virus    | yes | no  | yes |
| denmark | lactobacillus mucosae                  | Bacteria | no  | no  | no  |
| denmark | klebsiella oxytoca                     | Bacteria | yes | yes | no  |
| denmark | mycoplasma hominis                     | Bacteria | yes | no  | no  |
| denmark | influenza a virus                      | Virus    | yes | yes | yes |
| denmark | aeromonas salmonicida                  | Bacteria | no  | no  | no  |
| denmark | haemophilus influenzae                 | Bacteria | yes | no  | yes |
| denmark | listonella anguillarum                 | Bacteria | no  | no  | no  |
| denmark | enterococcus faecalis                  | Bacteria | yes | yes | yes |
| denmark | streptococcus gallolyticus             | Bacteria | no  | no  | no  |
| denmark | aggregatibacter segnis                 | Bacteria | no  | no  | no  |
| denmark | listeria monocytogenes                 | Bacteria | yes | yes | yes |
| denmark | cowpox virus                           | Virus    | yes | yes | no  |
| denmark | pseudamphistomum truncatum             | Helminth | yes | yes | no  |
| denmark | odoribacter splanchnicus               | Bacteria | no  | no  | no  |
| denmark | bacillus cereus                        | Bacteria | yes | yes | no  |
| denmark | haemophilus haemolyticus               | Bacteria | yes | no  | no  |
| denmark | plasmodium falciparum                  | Protozoa | yes | no  | yes |
| denmark | klebsiella pneumoniae                  | Bacteria | yes | yes | yes |
| denmark | cryptococcus neoformans                | Fungi    | yes | yes | yes |
| denmark | heligmosomoides polygyrus              | Helminth | no  | no  | no  |
| denmark | mycobacterium tuberculosis             | Bacteria | yes | yes | yes |
| denmark | penicillium polonicum                  | Fungi    | no  | no  | no  |
| denmark | staphylococcus xylosus                 | Bacteria | no  | no  | no  |
| denmark | citrobacter freundii                   | Bacteria | yes | yes | no  |
| denmark | helicobacter pylori                    | Bacteria | yes | yes | no  |
| denmark | oesophagostomum dentatum               | Helminth | no  | no  | no  |
| denmark | haemophilus parahaemolyticus           | Bacteria | yes | no  | no  |
| denmark | bordetella bronchiseptica              | Bacteria | yes | yes | no  |
| denmark | betacoronavirus 1                      | Virus    | no  | no  | no  |
| denmark | actinobacillus pleuropneumoniae        | Bacteria | yes | yes | no  |
| denmark | hysterothylacium aduncum               | Helminth | no  | no  | no  |
| denmark | debaryomyces hansenii                  | Fungi    | no  | no  | no  |
| denmark | staphylococcus aureus                  | Bacteria | yes | yes | yes |
| denmark | hepatitis c virus                      | Virus    | yes | no  | yes |
| denmark | pseudomonas fluorescens                | Bacteria | yes | no  | no  |
| denmark | aggregatibacter aphrophilus            | Bacteria | no  | no  | no  |
| denmark | clostridium botulinum                  | Bacteria | yes | yes | yes |

|         |                                    |          |     |     |     |
|---------|------------------------------------|----------|-----|-----|-----|
| denmark | toxoplasma gondii                  | Protozoa | yes | yes | yes |
| denmark | achromobacter xylosoxidans         | Bacteria | yes | no  | no  |
| denmark | viral hemorrhagic septicemia virus | Virus    | no  | no  | no  |
| denmark | aleutian mink disease virus        | Virus    | no  | no  | no  |
| denmark | rhizomucor pusillus                | Fungi    | yes | yes | no  |
| denmark | anisakis simplex                   | Helminth | yes | yes | yes |
| denmark | streptococcus hyointestinalis      | Bacteria | no  | no  | no  |
| denmark | influenza b virus                  | Virus    | yes | yes | no  |
| denmark | human enterovirus c                | Virus    | yes | no  | no  |
| denmark | streptococcus suis                 | Bacteria | yes | yes | no  |
| denmark | photobacterium phosphoreum         | Bacteria | no  | no  | no  |
| denmark | bacillus mycoides                  | Bacteria | yes | no  | no  |
| denmark | streptococcus uberis               | Bacteria | yes | yes | no  |
| denmark | entamoeba polecki                  | Protozoa | yes | yes | no  |
| denmark | rotavirus a                        | Virus    | yes | yes | yes |
| denmark | gallibacterium anatis              | Bacteria | no  | no  | no  |
| denmark | avibacterium gallinarum            | Bacteria | no  | no  | no  |
| denmark | trichuris muris                    | Helminth | no  | no  | no  |
| denmark | torque teno sus virus 2            | Virus    | no  | no  | no  |
| denmark | puumala virus                      | Virus    | yes | yes | yes |
| denmark | cryptococcus gattii                | Fungi    | no  | no  | no  |
| denmark | staphylococcus fleurettii          | Bacteria | no  | no  | no  |
| denmark | carnobacterium maltaromaticum      | Bacteria | no  | no  | no  |
| denmark | neisseria meningitidis             | Bacteria | yes | no  | yes |
| denmark | staphylococcus sciuri              | Bacteria | no  | no  | no  |
| denmark | staphylococcus haemolyticus        | Bacteria | yes | yes | no  |
| denmark | cladosporium cladosporioides       | Fungi    | yes | no  | no  |
| denmark | vaccinia virus                     | Virus    | no  | no  | no  |
| denmark | stenotrophomonas maltophilia       | Bacteria | no  | no  | no  |
| denmark | anaplasma phagocytophilum          | Bacteria | no  | no  | no  |
| denmark | veillonella parvula                | Bacteria | yes | no  | no  |
| denmark | variovorax paradoxus               | Bacteria | no  | no  | no  |
| denmark | staphylococcus vitulinus           | Bacteria | no  | no  | no  |
| denmark | pseudomonas stutzeri               | Bacteria | yes | no  | no  |
| denmark | streptococcus sobrinus             | Bacteria | yes | no  | no  |
| denmark | enterococcus faecium               | Bacteria | yes | yes | yes |
| denmark | gyrodactylus salaris               | Helminth | no  | no  | no  |
| denmark | agrobacterium tumefaciens          | Bacteria | no  | no  | no  |
| denmark | rhodococcus fascians               | Bacteria | yes | no  | no  |
| denmark | photobacterium iliopiscarium       | Bacteria | no  | no  | no  |
| denmark | streptococcus pluranimalium        | Bacteria | no  | no  | no  |
| denmark | salmonella enterica                | Bacteria | no  | no  | no  |
| denmark | giardia intestinalis               | Protozoa | no  | no  | no  |
| denmark | eubothrium crassum                 | Helminth | no  | no  | no  |
| denmark | foot-and-mouth disease virus       | Virus    | no  | no  | no  |
| denmark | escherichia coli                   | Bacteria | yes | yes | yes |
| denmark | monkeypox virus                    | Virus    | yes | yes | yes |
| denmark | rhodococcus erythropolis           | Bacteria | yes | no  | no  |
| denmark | human enterovirus a                | Virus    | yes | no  | no  |
| denmark | hymenolepis diminuta               | Helminth | yes | yes | no  |

|                    |                                      |          |     |     |     |
|--------------------|--------------------------------------|----------|-----|-----|-----|
| denmark            | staphylococcus hyicus                | Bacteria | yes | yes | no  |
| denmark            | streptococcus pneumoniae             | Bacteria | yes | yes | yes |
| denmark            | torque teno sus virus 1              | Virus    | no  | no  | no  |
| denmark            | borrelia garinii                     | Bacteria | no  | no  | no  |
| denmark            | human metapneumovirus                | Virus    | no  | no  | no  |
| denmark            | hymenolepis microstoma               | Helminth | no  | no  | no  |
| denmark            | sapporo virus                        | Virus    | no  | no  | no  |
| denmark            | carnobacterium divergens             | Bacteria | no  | no  | no  |
| denmark            | hepatitis b virus                    | Virus    | yes | no  | yes |
| denmark            | human immunodeficiency virus 1       | Virus    | yes | no  | yes |
| denmark            | staphylococcus epidermidis           | Bacteria | yes | yes | yes |
| denmark            | mycoplasma genitalium                | Bacteria | yes | no  | no  |
| djibouti           | vibrio cholerae                      | Bacteria | yes | no  | yes |
| djibouti           | human immunodeficiency virus 1       | Virus    | yes | no  | yes |
| djibouti           | hepatitis e virus                    | Virus    | yes | yes | yes |
| djibouti           | influenza a virus                    | Virus    | yes | yes | yes |
| djibouti           | mycobacterium canettii               | Bacteria | no  | no  | no  |
| djibouti           | norwalk virus                        | Virus    | yes | no  | yes |
| djibouti           | leishmania donovani                  | Protozoa | yes | yes | yes |
| djibouti           | dengue virus                         | Virus    | no  | no  | no  |
| dominica           | human immunodeficiency virus 1       | Virus    | yes | no  | yes |
| dominica           | plasmodium floridense                | Protozoa | no  | no  | no  |
| dominica           | plasmodium azurophilum               | Protozoa | no  | no  | no  |
| dominica           | anaplasma marginale                  | Bacteria | no  | no  | no  |
| dominica           | dengue virus                         | Virus    | no  | no  | no  |
| dominican republic | human enterovirus b                  | Virus    | yes | no  | yes |
| dominican republic | human immunodeficiency virus 1       | Virus    | yes | no  | yes |
| dominican republic | norwalk virus                        | Virus    | yes | no  | yes |
| dominican republic | fusarium solani                      | Fungi    | yes | yes | yes |
| dominican republic | schizophyllum commune                | Fungi    | yes | no  | no  |
| dominican republic | african swine fever virus            | Virus    | no  | no  | no  |
| dominican republic | mumps virus                          | Virus    | yes | no  | no  |
| dominican republic | newcastle disease virus              | Virus    | yes | yes | no  |
| dominican republic | influenza a virus                    | Virus    | yes | yes | yes |
| dominican republic | bluetongue virus                     | Virus    | no  | no  | no  |
| dominican republic | human enterovirus c                  | Virus    | yes | no  | no  |
| dominican republic | dengue virus                         | Virus    | no  | no  | no  |
| dominican republic | infectious bursal disease virus      | Virus    | no  | no  | no  |
| east timor         | dengue virus                         | Virus    | no  | no  | no  |
| east timor         | chikungunya virus                    | Virus    | yes | yes | yes |
| east timor         | plasmodium vivax                     | Protozoa | yes | no  | yes |
| east timor         | plasmodium falciparum                | Protozoa | yes | no  | yes |
| ecuador            | human herpesvirus 8                  | Virus    | yes | no  | yes |
| ecuador            | west Nile virus                      | Virus    | yes | yes | yes |
| ecuador            | plectosphaerella cucumerina          | Fungi    | no  | no  | no  |
| ecuador            | venezuelan equine encephalitis virus | Virus    | yes | yes | yes |
| ecuador            | chlamydomyces psittaci               | Bacteria | yes | yes | no  |
| ecuador            | human respiratory syncytial virus    | Virus    | yes | no  | no  |
| ecuador            | gnathostoma binucleatum              | Helminth | no  | no  | no  |
| ecuador            | onchocerca volvulus                  | Helminth | yes | yes | yes |

|         |                                   |          |     |     |     |
|---------|-----------------------------------|----------|-----|-----|-----|
| ecuador | leclercia adecarboxylata          | Bacteria | no  | no  | no  |
| ecuador | dengue virus                      | Virus    | no  | no  | no  |
| ecuador | ajellomyces capsulatus            | Fungi    | no  | no  | no  |
| ecuador | foot-and-mouth disease virus      | Virus    | no  | no  | no  |
| ecuador | human enterovirus c               | Virus    | yes | no  | no  |
| ecuador | human immunodeficiency virus 1    | Virus    | yes | no  | yes |
| ecuador | taenia solium                     | Helminth | yes | no  | yes |
| ecuador | leishmania panamensis             | Protozoa | yes | yes | no  |
| ecuador | hepatitis b virus                 | Virus    | yes | no  | yes |
| ecuador | human enterovirus b               | Virus    | yes | no  | yes |
| ecuador | botryosphaeria rhodina            | Fungi    | no  | no  | no  |
| ecuador | influenza a virus                 | Virus    | yes | yes | yes |
| ecuador | bartonella bacilliformis          | Bacteria | no  | no  | no  |
| ecuador | gibberella intermedia             | Fungi    | no  | no  | no  |
| ecuador | plasmodium falciparum             | Protozoa | yes | no  | yes |
| ecuador | caraparuvirus                     | Virus    | yes | yes | no  |
| ecuador | penicillium citreonigrum          | Fungi    | no  | no  | no  |
| ecuador | trypanosoma cruzi                 | Protozoa | yes | yes | yes |
| ecuador | leptospira santarosai             | Bacteria | yes | yes | no  |
| ecuador | influenza b virus                 | Virus    | yes | yes | no  |
| ecuador | epicoccum nigrum                  | Fungi    | no  | no  | no  |
| ecuador | fusarium oxysporum                | Fungi    | yes | no  | yes |
| ecuador | bacillus cereus                   | Bacteria | yes | yes | no  |
| ecuador | eastern equine encephalitis virus | Virus    | yes | yes | yes |
| ecuador | measles virus                     | Virus    | yes | yes | yes |
| ecuador | schizophyllum commune             | Fungi    | yes | no  | no  |
| ecuador | leptospira borgpetersenii         | Bacteria | yes | yes | no  |
| ecuador | paragonimus mexicanus             | Helminth | yes | yes | no  |
| ecuador | fowl adenovirus c                 | Virus    | no  | no  | no  |
| ecuador | alternaria alternata              | Fungi    | yes | yes | no  |
| ecuador | leptospira inadai                 | Bacteria | yes | yes | no  |
| ecuador | cryptosporidium hominis           | Protozoa | yes | no  | yes |
| ecuador | yellow fever virus                | Virus    | yes | yes | yes |
| ecuador | gibberella moniliformis           | Fungi    | no  | no  | no  |
| ecuador | fusarium solani                   | Fungi    | yes | yes | yes |
| ecuador | rotavirus a                       | Virus    | yes | yes | yes |
| ecuador | pestalotiopsis microspora         | Fungi    | no  | no  | no  |
| ecuador | taenia saginata                   | Helminth | yes | yes | no  |
| ecuador | plasmodium vivax                  | Protozoa | yes | no  | yes |
| egypt   | salmonella enterica               | Bacteria | no  | no  | no  |
| egypt   | infectious bursal disease virus   | Virus    | no  | no  | no  |
| egypt   | pseudomonas putida                | Bacteria | yes | no  | no  |
| egypt   | lactobacillus plantarum           | Bacteria | no  | no  | no  |
| egypt   | human enterovirus b               | Virus    | yes | no  | yes |
| egypt   | botryosphaeria rhodina            | Fungi    | no  | no  | no  |
| egypt   | rabies virus                      | Virus    | yes | yes | yes |
| egypt   | rift valley fever virus           | Virus    | yes | yes | yes |
| egypt   | hymenolepis diminuta              | Helminth | yes | yes | no  |
| egypt   | campylobacter jejuni              | Bacteria | yes | yes | yes |
| egypt   | agrobacterium tumefaciens         | Bacteria | no  | no  | no  |

|       |                                       |          |     |     |     |
|-------|---------------------------------------|----------|-----|-----|-----|
| egypt | hepatitis b virus                     | Virus    | yes | no  | yes |
| egypt | haemophilus influenzae                | Bacteria | yes | no  | yes |
| egypt | fibrobacter succinogenes              | Bacteria | no  | no  | no  |
| egypt | fasciola hepatica                     | Helminth | yes | yes | no  |
| egypt | pseudomonas pseudoalcaligenes         | Bacteria | yes | no  | no  |
| egypt | influenza b virus                     | Virus    | yes | yes | no  |
| egypt | hepatitis c virus                     | Virus    | yes | no  | yes |
| egypt | shigella flexneri                     | Bacteria | yes | yes | no  |
| egypt | contraecum micropapillatum            | Helminth | no  | no  | no  |
| egypt | bovine herpesvirus 1                  | Virus    | no  | no  | no  |
| egypt | chicken anemia virus                  | Virus    | no  | no  | no  |
| egypt | propionibacterium acnes               | Bacteria | yes | yes | no  |
| egypt | cronobacter malonaticus               | Bacteria | no  | no  | no  |
| egypt | pseudomonas stutzeri                  | Bacteria | yes | no  | no  |
| egypt | mycoplasma gallisepticum              | Bacteria | no  | no  | no  |
| egypt | peste-des-petits-ruminants virus      | Virus    | no  | no  | no  |
| egypt | pepper mild mottle virus              | Virus    | no  | no  | no  |
| egypt | crimean-congo hemorrhagic fever virus | Virus    | no  | no  | no  |
| egypt | cryptosporidium hominis               | Protozoa | yes | no  | yes |
| egypt | trichinella spiralis                  | Helminth | yes | yes | yes |
| egypt | cryptosporidium bovis                 | Protozoa | no  | no  | no  |
| egypt | trichoderma atroviride                | Fungi    | no  | no  | no  |
| egypt | avian coronavirus                     | Virus    | no  | no  | no  |
| egypt | schistosoma mansoni                   | Helminth | yes | yes | yes |
| egypt | borna disease virus                   | Virus    | yes | yes | no  |
| egypt | bovine ephemeral fever virus          | Virus    | yes | yes | no  |
| egypt | sandfly fever naples virus            | Virus    | yes | yes | yes |
| egypt | norwalk virus                         | Virus    | yes | no  | yes |
| egypt | hepatitis e virus                     | Virus    | yes | yes | yes |
| egypt | haemonchus contortus                  | Helminth | yes | yes | no  |
| egypt | leishmania tropica                    | Protozoa | yes | yes | no  |
| egypt | giardia intestinalis                  | Protozoa | no  | no  | no  |
| egypt | west Nile virus                       | Virus    | yes | yes | yes |
| egypt | fusarium oxysporum                    | Fungi    | yes | no  | yes |
| egypt | borrelia burgdorferi                  | Bacteria | yes | yes | yes |
| egypt | pseudomonas aeruginosa                | Bacteria | yes | yes | yes |
| egypt | rickettsia typhi                      | Bacteria | yes | yes | no  |
| egypt | sinorhizobium medicae                 | Bacteria | no  | no  | no  |
| egypt | bacillus licheniformis                | Bacteria | yes | yes | no  |
| egypt | rabbit hemorrhagic disease virus      | Virus    | no  | no  | no  |
| egypt | ajellomyces capsulatus                | Fungi    | no  | no  | no  |
| egypt | Newcastle disease virus               | Virus    | yes | yes | no  |
| egypt | plectosphaerella cucumerina           | Fungi    | no  | no  | no  |
| egypt | coxiella burnetii                     | Bacteria | yes | yes | no  |
| egypt | equid herpesvirus 2                   | Virus    | no  | no  | no  |
| egypt | bacillus subtilis                     | Bacteria | yes | yes | no  |
| egypt | human adenovirus b                    | Virus    | yes | no  | no  |
| egypt | foot-and-mouth disease virus          | Virus    | no  | no  | no  |
| egypt | cronobacter sakazakii                 | Bacteria | no  | no  | no  |
| egypt | aeromonas hydrophila                  | Bacteria | yes | yes | yes |

|       |                                   |          |     |     |     |
|-------|-----------------------------------|----------|-----|-----|-----|
| egypt | penicillium commune               | Fungi    | yes | no  | no  |
| egypt | protogyrodactylus amacleithrium   | Helminth | no  | no  | no  |
| egypt | mycoplasma bovis                  | Bacteria | no  | no  | no  |
| egypt | human immunodeficiency virus 2    | Virus    | yes | no  | yes |
| egypt | carnobacterium divergens          | Bacteria | no  | no  | no  |
| egypt | bacillus thuringiensis            | Bacteria | yes | no  | no  |
| egypt | anaplasma marginale               | Bacteria | no  | no  | no  |
| egypt | cladorrhinum bulbiliosum          | Fungi    | yes | no  | no  |
| egypt | ruminococcus albus                | Bacteria | no  | no  | no  |
| egypt | haemonchus longistipes            | Helminth | no  | no  | no  |
| egypt | primate t-lymphotropic virus 1    | Virus    | no  | no  | no  |
| egypt | bacillus amyloliquefaciens        | Bacteria | no  | no  | no  |
| egypt | streptococcus pyogenes            | Bacteria | yes | yes | yes |
| egypt | burkholderia cepacia              | Bacteria | yes | no  | no  |
| egypt | leptospira interrogans            | Bacteria | yes | yes | yes |
| egypt | alcaligenes faecalis              | Bacteria | no  | no  | no  |
| egypt | aspergillus oryzae                | Fungi    | yes | no  | no  |
| egypt | ascaris lumbricoides              | Helminth | yes | yes | no  |
| egypt | bacillus pumilus                  | Bacteria | yes | no  | no  |
| egypt | cryptosporidium andersoni         | Protozoa | no  | no  | no  |
| egypt | aspergillus tamaraii              | Fungi    | no  | no  | no  |
| egypt | cryptococcus neoformans           | Fungi    | yes | yes | yes |
| egypt | streptococcus pneumoniae          | Bacteria | yes | yes | yes |
| egypt | equid herpesvirus 1               | Virus    | no  | no  | no  |
| egypt | rinderpest virus                  | Virus    | no  | no  | no  |
| egypt | rickettsia africae                | Bacteria | yes | yes | no  |
| egypt | hepatitis a virus                 | Virus    | yes | yes | yes |
| egypt | human adenovirus c                | Virus    | yes | no  | no  |
| egypt | human enterovirus c               | Virus    | yes | no  | no  |
| egypt | influenza a virus                 | Virus    | yes | yes | yes |
| egypt | rotavirus a                       | Virus    | yes | yes | yes |
| egypt | penicillium chrysogenum           | Fungi    | yes | no  | no  |
| egypt | cryptosporidium parvum            | Protozoa | yes | yes | yes |
| egypt | bovine viral diarrhea virus 1     | Virus    | no  | no  | no  |
| egypt | aspergillus niger                 | Fungi    | yes | yes | no  |
| egypt | protogyrodactylus johnstonettiegi | Helminth | no  | no  | no  |
| egypt | fusarium solani                   | Fungi    | yes | yes | yes |
| egypt | bacillus anthracis                | Bacteria | yes | yes | yes |
| egypt | echinococcus granulosus           | Helminth | yes | yes | yes |
| egypt | human metapneumovirus             | Virus    | no  | no  | no  |
| egypt | vagococcus fluvialis              | Bacteria | no  | no  | no  |
| egypt | human enterovirus d               | Virus    | yes | no  | no  |
| egypt | schistosoma haematobium           | Helminth | yes | yes | no  |
| egypt | babesia canis                     | Protozoa | no  | no  | no  |
| egypt | corallobothrium solidum           | Helminth | no  | no  | no  |
| egypt | leishmania major                  | Protozoa | yes | yes | no  |
| egypt | staphylococcus aureus             | Bacteria | yes | yes | yes |
| egypt | aspergillus fumigatus             | Fungi    | no  | no  | no  |
| egypt | penicillium citrinum              | Fungi    | yes | no  | no  |
| egypt | sheeppox virus                    | Virus    | no  | no  | no  |



|                   |                                   |          |     |     |     |
|-------------------|-----------------------------------|----------|-----|-----|-----|
| egypt             | avian leukosis virus              | Virus    | no  | no  | no  |
| egypt             | aspergillus flavus                | Fungi    | no  | no  | no  |
| egypt             | anaplasma phagocytophilum         | Bacteria | no  | no  | no  |
| egypt             | kyasanur forest disease virus     | Virus    | yes | yes | yes |
| egypt             | classical swine fever virus       | Virus    | no  | no  | no  |
| egypt             | escherichia coli                  | Bacteria | yes | yes | yes |
| egypt             | cryptosporidium ryanae            | Protozoa | no  | no  | no  |
| egypt             | neoscytalidium dimidiatum         | Fungi    | no  | no  | no  |
| egypt             | hymenolepis nana                  | Helminth | yes | yes | no  |
| egypt             | aspergillus terreus               | Fungi    | no  | no  | no  |
| egypt             | human enterovirus a               | Virus    | yes | no  | no  |
| egypt             | hepatitis delta virus             | Virus    | yes | no  | no  |
| egypt             | fasciola gigantica                | Helminth | yes | yes | no  |
| egypt             | lumpy skin disease virus          | Virus    | no  | no  | no  |
| egypt             | leishmania donovani               | Protozoa | yes | yes | yes |
| egypt             | human immunodeficiency virus 1    | Virus    | yes | no  | yes |
| egypt             | bacillus cereus                   | Bacteria | yes | yes | no  |
| el salvador       | dengue virus                      | Virus    | no  | no  | no  |
| el salvador       | human immunodeficiency virus 2    | Virus    | yes | no  | yes |
| el salvador       | trypanosoma cruzi                 | Protozoa | yes | yes | yes |
| el salvador       | rabies virus                      | Virus    | yes | yes | yes |
| el salvador       | plasmodium vivax                  | Protozoa | yes | no  | yes |
| el salvador       | influenza a virus                 | Virus    | yes | yes | yes |
| el salvador       | trypanosoma rangeli               | Protozoa | no  | no  | no  |
| el salvador       | human respiratory syncytial virus | Virus    | yes | no  | no  |
| el salvador       | plasmodium falciparum             | Protozoa | yes | no  | yes |
| el salvador       | human immunodeficiency virus 1    | Virus    | yes | no  | yes |
| el salvador       | hepatitis b virus                 | Virus    | yes | no  | yes |
| equatorial guinea | human immunodeficiency virus 1    | Virus    | yes | no  | yes |
| equatorial guinea | chikungunya virus                 | Virus    | yes | yes | yes |
| equatorial guinea | unidentified nematode             | Helminth | no  | no  | no  |
| equatorial guinea | trypanosoma avium                 | Protozoa | no  | no  | no  |
| equatorial guinea | measles virus                     | Virus    | yes | yes | yes |
| equatorial guinea | trypanosoma everetti              | Protozoa | no  | no  | no  |
| equatorial guinea | rabies virus                      | Virus    | yes | yes | yes |
| equatorial guinea | simian immunodeficiency virus     | Virus    | no  | no  | no  |
| equatorial guinea | hepatitis c virus                 | Virus    | yes | no  | yes |
| equatorial guinea | hepatitis b virus                 | Virus    | yes | no  | yes |
| equatorial guinea | plasmodium falciparum             | Protozoa | yes | no  | yes |
| equatorial guinea | human immunodeficiency virus 2    | Virus    | yes | no  | yes |
| equatorial guinea | primate t-lymphotropic virus 1    | Virus    | no  | no  | no  |
| eritrea           | human immunodeficiency virus 1    | Virus    | yes | no  | yes |
| eritrea           | leishmania aethiopica             | Protozoa | yes | yes | no  |
| eritrea           | foot-and-mouth disease virus      | Virus    | no  | no  | no  |
| estonia           | dobrava-belgrade virus            | Virus    | yes | yes | no  |
| estonia           | lactobacillus fermentum           | Bacteria | no  | no  | no  |
| estonia           | human immunodeficiency virus 2    | Virus    | yes | no  | yes |
| estonia           | hepatitis c virus                 | Virus    | yes | no  | yes |
| estonia           | diphyllobothrium dendriticum      | Helminth | yes | yes | no  |
| estonia           | epicoccum nigrum                  | Fungi    | no  | no  | no  |

|          |                                 |          |     |     |     |
|----------|---------------------------------|----------|-----|-----|-----|
| estonia  | human immunodeficiency virus 1  | Virus    | yes | no  | yes |
| estonia  | echinococcus multilocularis     | Helminth | yes | yes | no  |
| estonia  | tick-borne encephalitis virus   | Virus    | no  | no  | no  |
| estonia  | influenza a virus               | Virus    | yes | yes | yes |
| estonia  | babesia microti                 | Protozoa | yes | yes | yes |
| estonia  | borrelia afzelii                | Bacteria | no  | no  | no  |
| estonia  | echinococcus canadensis         | Helminth | no  | no  | no  |
| estonia  | metastrongylus pudendotectus    | Helminth | no  | no  | no  |
| estonia  | human enterovirus b             | Virus    | yes | no  | yes |
| estonia  | rabies virus                    | Virus    | yes | yes | yes |
| estonia  | hepatitis a virus               | Virus    | yes | yes | yes |
| estonia  | diphyllobothrium latum          | Helminth | yes | yes | no  |
| estonia  | measles virus                   | Virus    | yes | yes | yes |
| estonia  | metastrongylus salmi            | Helminth | no  | no  | no  |
| estonia  | human parvovirus b19            | Virus    | no  | no  | no  |
| estonia  | metastrongylus elongatus        | Helminth | yes | yes | no  |
| estonia  | haematoloechus macrorchis       | Helminth | no  | no  | no  |
| estonia  | hepatitis b virus               | Virus    | yes | no  | yes |
| estonia  | anaplasma phagocytophilum       | Bacteria | no  | no  | no  |
| estonia  | haematoloechus micrurus         | Helminth | no  | no  | no  |
| estonia  | helicobacter pylori             | Bacteria | yes | yes | no  |
| ethiopia | echinococcus canadensis         | Helminth | no  | no  | no  |
| ethiopia | human enterovirus b             | Virus    | yes | no  | yes |
| ethiopia | human papillomavirus 16         | Virus    | no  | no  | no  |
| ethiopia | rubella virus                   | Virus    | yes | no  | no  |
| ethiopia | foot-and-mouth disease virus    | Virus    | no  | no  | no  |
| ethiopia | human immunodeficiency virus 2  | Virus    | yes | no  | yes |
| ethiopia | entamoeba histolytica           | Protozoa | yes | yes | no  |
| ethiopia | taenia saginata                 | Helminth | yes | yes | no  |
| ethiopia | hepatitis delta virus           | Virus    | yes | no  | no  |
| ethiopia | neisseria meningitidis          | Bacteria | yes | no  | yes |
| ethiopia | trypanosoma brucei              | Protozoa | yes | yes | yes |
| ethiopia | hepatitis b virus               | Virus    | yes | no  | yes |
| ethiopia | bk polyomavirus                 | Virus    | no  | no  | no  |
| ethiopia | giardia intestinalis            | Protozoa | no  | no  | no  |
| ethiopia | echinococcus granulosus         | Helminth | yes | yes | yes |
| ethiopia | ovine herpesvirus 2             | Virus    | no  | no  | no  |
| ethiopia | plasmodium falciparum           | Protozoa | yes | no  | yes |
| ethiopia | leishmania aethiopica           | Protozoa | yes | yes | no  |
| ethiopia | selenomonas ruminantium         | Bacteria | no  | no  | no  |
| ethiopia | pichia kudriavzevii             | Fungi    | no  | no  | no  |
| ethiopia | onchocerca volvulus             | Helminth | yes | yes | yes |
| ethiopia | treponema pallidum              | Bacteria | yes | no  | yes |
| ethiopia | west nile virus                 | Virus    | yes | yes | yes |
| ethiopia | neisseria gonorrhoeae           | Bacteria | yes | no  | yes |
| ethiopia | mycobacterium bovis             | Bacteria | yes | yes | yes |
| ethiopia | mycobacterium tuberculosis      | Bacteria | yes | yes | yes |
| ethiopia | primate t-lymphotropic virus 3  | Virus    | no  | no  | no  |
| ethiopia | bothriocephalus acheilognathi   | Helminth | no  | no  | no  |
| ethiopia | infectious bursal disease virus | Virus    | no  | no  | no  |

|                  |                                  |          |     |     |     |
|------------------|----------------------------------|----------|-----|-----|-----|
| ethiopia         | peste-des-petits-ruminants virus | Virus    | no  | no  | no  |
| ethiopia         | rickettsia africae               | Bacteria | yes | yes | no  |
| ethiopia         | ehrlichia ruminantium            | Bacteria | no  | no  | no  |
| ethiopia         | kluveromyces marxianus           | Fungi    | no  | no  | no  |
| ethiopia         | entamoeba polecki                | Protozoa | yes | yes | no  |
| ethiopia         | candida tropicalis               | Fungi    | yes | yes | no  |
| ethiopia         | human immunodeficiency virus 1   | Virus    | yes | no  | yes |
| ethiopia         | mesorhizobium loti               | Bacteria | no  | no  | no  |
| ethiopia         | staphylococcus aureus            | Bacteria | yes | yes | yes |
| ethiopia         | rotavirus a                      | Virus    | yes | yes | yes |
| ethiopia         | plasmodium vivax                 | Protozoa | yes | no  | yes |
| ethiopia         | bartonella quintana              | Bacteria | yes | no  | no  |
| ethiopia         | rabies virus                     | Virus    | yes | yes | yes |
| ethiopia         | jc polyomavirus                  | Virus    | no  | no  | no  |
| ethiopia         | candida albicans                 | Fungi    | yes | yes | yes |
| ethiopia         | borrelia recurrentis             | Bacteria | yes | no  | no  |
| ethiopia         | streptococcus pyogenes           | Bacteria | yes | yes | yes |
| ethiopia         | variola virus                    | Virus    | no  | no  | no  |
| ethiopia         | candida glabrata                 | Fungi    | yes | yes | yes |
| ethiopia         | yellow fever virus               | Virus    | yes | yes | yes |
| ethiopia         | trichoderma longibrachiatum      | Fungi    | no  | no  | no  |
| ethiopia         | escherichia coli                 | Bacteria | yes | yes | yes |
| ethiopia         | leishmania donovani              | Protozoa | yes | yes | yes |
| falkland islands | echinococcus granulosus          | Helminth | yes | yes | yes |
| faroe islands    | infectious salmon anemia virus   | Virus    | no  | no  | no  |
| faroe islands    | chlamydomyces psittaci           | Bacteria | yes | yes | no  |
| faroe islands    | moritella viscosa                | Bacteria | no  | no  | no  |
| fiji             | dengue virus                     | Virus    | no  | no  | no  |
| fiji             | streptococcus pyogenes           | Bacteria | yes | yes | yes |
| fiji             | human immunodeficiency virus 2   | Virus    | yes | no  | yes |
| fiji             | staphylococcus aureus            | Bacteria | yes | yes | yes |
| fiji             | human immunodeficiency virus 1   | Virus    | yes | no  | yes |
| fiji             | influenza a virus                | Virus    | yes | yes | yes |
| fiji             | salinispora arenicola            | Bacteria | no  | no  | no  |
| fiji             | pseudomonas stutzeri             | Bacteria | yes | no  | no  |
| fiji             | ross river virus                 | Virus    | yes | yes | yes |
| fiji             | hepatitis b virus                | Virus    | yes | no  | yes |
| fiji             | streptococcus pneumoniae         | Bacteria | yes | yes | yes |
| fiji             | jc polyomavirus                  | Virus    | no  | no  | no  |
| finland          | catenotaenia henttoneni          | Helminth | no  | no  | no  |
| finland          | tick-borne encephalitis virus    | Virus    | no  | no  | no  |
| finland          | helicobacter bizzozeronii        | Bacteria | no  | no  | no  |
| finland          | pseudocowpox virus               | Virus    | yes | yes | no  |
| finland          | lactobacillus crispatus          | Bacteria | no  | no  | no  |
| finland          | sphingomonas paucimobilis        | Bacteria | yes | no  | no  |
| finland          | mycobacterium avium              | Bacteria | yes | yes | yes |
| finland          | european bat lyssavirus 2        | Virus    | yes | yes | no  |
| finland          | chryseobacterium piscicola       | Bacteria | no  | no  | no  |
| finland          | hepatitis a virus                | Virus    | yes | yes | yes |
| finland          | malassezia furfur                | Fungi    | yes | yes | no  |

|         |                                      |          |     |     |     |
|---------|--------------------------------------|----------|-----|-----|-----|
| finland | chlamydomydia pneumoniae             | Bacteria | yes | yes | no  |
| finland | bk polyomavirus                      | Virus    | no  | no  | no  |
| finland | orf virus                            | Virus    | yes | yes | no  |
| finland | rabies virus                         | Virus    | yes | yes | yes |
| finland | gyrodactylus osmeri                  | Helminth | no  | no  | no  |
| finland | staphylococcus saprophyticus         | Bacteria | yes | no  | no  |
| finland | lysinibacillus fusiformis            | Bacteria | no  | no  | no  |
| finland | aeromonas salmonicida                | Bacteria | no  | no  | no  |
| finland | psychrobacter faecalis               | Bacteria | no  | no  | no  |
| finland | human enterovirus a                  | Virus    | yes | no  | no  |
| finland | staphylococcus equorum               | Bacteria | no  | no  | no  |
| finland | lactobacillus rhamnosus              | Bacteria | no  | no  | no  |
| finland | paranoplocephala kalelai             | Helminth | no  | no  | no  |
| finland | brachyspira pilosicoli               | Bacteria | no  | no  | no  |
| finland | catenotaenia dendritica              | Helminth | no  | no  | no  |
| finland | raphidascaris acus                   | Helminth | no  | no  | no  |
| finland | babesia divergens                    | Protozoa | yes | yes | no  |
| finland | massilia timonae                     | Bacteria | no  | no  | no  |
| finland | paranoplocephala gracilis            | Helminth | no  | no  | no  |
| finland | setaria tundra                       | Helminth | no  | no  | no  |
| finland | salmonella enterica                  | Bacteria | no  | no  | no  |
| finland | bacillus subtilis                    | Bacteria | yes | yes | no  |
| finland | lactococcus lactis                   | Bacteria | no  | no  | no  |
| finland | jc polyomavirus                      | Virus    | no  | no  | no  |
| finland | paranoplocephala blanchardi          | Helminth | no  | no  | no  |
| finland | trypanosoma avium                    | Protozoa | no  | no  | no  |
| finland | rubella virus                        | Virus    | yes | no  | no  |
| finland | trichinella spiralis                 | Helminth | yes | yes | yes |
| finland | rotavirus a                          | Virus    | yes | yes | yes |
| finland | acinetobacter baumannii              | Bacteria | yes | no  | no  |
| finland | acinetobacter calcoaceticus          | Bacteria | yes | no  | no  |
| finland | chikungunya virus                    | Virus    | yes | yes | yes |
| finland | bacillus cereus                      | Bacteria | yes | yes | no  |
| finland | streptococcus suis                   | Bacteria | yes | yes | no  |
| finland | neisseria meningitidis               | Bacteria | yes | no  | yes |
| finland | caprine arthritis encephalitis virus | Virus    | no  | no  | no  |
| finland | diphyllobothrium ditremum            | Helminth | no  | no  | no  |
| finland | fusarium oxysporum                   | Fungi    | yes | no  | yes |
| finland | sindbis virus                        | Virus    | yes | yes | yes |
| finland | loma acerinae                        | Fungi    | no  | no  | no  |
| finland | mosgovoyia pectinata                 | Helminth | no  | no  | no  |
| finland | human enterovirus b                  | Virus    | yes | no  | yes |
| finland | human rhinovirus c                   | Virus    | no  | no  | no  |
| finland | newcastle disease virus              | Virus    | yes | yes | no  |
| finland | aeromonas bestiarum                  | Bacteria | no  | no  | no  |
| finland | escherichia coli                     | Bacteria | yes | yes | yes |
| finland | gyrodactylus salaris                 | Helminth | no  | no  | no  |
| finland | cervid herpesvirus 2                 | Virus    | no  | no  | no  |
| finland | dialister micraerophilus             | Bacteria | no  | no  | no  |
| finland | bacillus licheniformis               | Bacteria | yes | yes | no  |

|         |                                |          |     |     |     |
|---------|--------------------------------|----------|-----|-----|-----|
| finland | gyrodactylus magnificus        | Helminth | no  | no  | no  |
| finland | flavobacterium columnare       | Bacteria | no  | no  | no  |
| finland | cowpox virus                   | Virus    | yes | yes | no  |
| finland | yersinia enterocolitica        | Bacteria | yes | yes | yes |
| finland | taenia polyacantha             | Helminth | no  | no  | no  |
| finland | bacillus pumilus               | Bacteria | yes | no  | no  |
| finland | influenza a virus              | Virus    | yes | yes | yes |
| finland | burkholderia multivorans       | Bacteria | no  | no  | no  |
| finland | bacillus anthracis             | Bacteria | yes | yes | yes |
| finland | enterobacter amnigenus         | Bacteria | yes | yes | no  |
| finland | semliki forest virus           | Virus    | yes | yes | no  |
| finland | clavispora lusitaniae          | Fungi    | no  | no  | no  |
| finland | echinococcus canadensis        | Helminth | no  | no  | no  |
| finland | campylobacter jejuni           | Bacteria | yes | yes | yes |
| finland | streptococcus pyogenes         | Bacteria | yes | yes | yes |
| finland | mycobacterium bohemicum        | Bacteria | no  | no  | no  |
| finland | micrococcus luteus             | Bacteria | no  | no  | no  |
| finland | human papillomavirus 26        | Virus    | no  | no  | no  |
| finland | ichthyocotylurus erraticus     | Helminth | no  | no  | no  |
| finland | kocuria marina                 | Bacteria | no  | no  | no  |
| finland | pantoea agglomerans            | Bacteria | yes | yes | no  |
| finland | norwalk virus                  | Virus    | yes | no  | yes |
| finland | ancyrocephalus percae          | Helminth | no  | no  | no  |
| finland | ichthyocotylurus variegatus    | Helminth | no  | no  | no  |
| finland | bacillus megaterium            | Bacteria | no  | no  | no  |
| finland | staphylococcus sciuri          | Bacteria | no  | no  | no  |
| finland | haemophilus influenzae         | Bacteria | yes | no  | yes |
| finland | pseudomonas fragi              | Bacteria | no  | no  | no  |
| finland | clostridium botulinum          | Bacteria | yes | yes | yes |
| finland | aeromonas hydrophila           | Bacteria | yes | yes | yes |
| finland | lysinibacillus sphaericus      | Bacteria | no  | no  | no  |
| finland | human rhinovirus a             | Virus    | yes | no  | no  |
| finland | ichthyocotylurus platycephalus | Helminth | no  | no  | no  |
| finland | influenza b virus              | Virus    | yes | yes | no  |
| finland | bacillus circulans             | Bacteria | yes | no  | no  |
| finland | human parechovirus             | Virus    | no  | no  | no  |
| finland | brucella suis                  | Bacteria | yes | yes | no  |
| finland | yersinia aleksiciae            | Bacteria | no  | no  | no  |
| finland | pleistophora mirandellae       | Fungi    | no  | no  | no  |
| finland | streptococcus pneumoniae       | Bacteria | yes | yes | yes |
| finland | yersinia ruckeri               | Bacteria | yes | yes | no  |
| finland | human enterovirus c            | Virus    | yes | no  | no  |
| finland | staphylococcus vitulinus       | Bacteria | no  | no  | no  |
| finland | ichthyocotylurus pileatus      | Helminth | no  | no  | no  |
| finland | human rhinovirus b             | Virus    | yes | no  | no  |
| finland | human immunodeficiency virus 1 | Virus    | yes | no  | yes |
| finland | helicobacter pylori            | Bacteria | yes | yes | no  |
| finland | staphylococcus xylosus         | Bacteria | no  | no  | no  |
| finland | diphyllobothrium latum         | Helminth | yes | yes | no  |
| finland | microbacterium oxydans         | Bacteria | no  | no  | no  |

|         |                                |          |     |     |     |
|---------|--------------------------------|----------|-----|-----|-----|
| finland | puumala virus                  | Virus    | yes | yes | yes |
| france  | acinetobacter baumannii        | Bacteria | yes | no  | no  |
| france  | sporothrix schenckii           | Fungi    | yes | yes | no  |
| france  | lamellogasterium virgula       | Helminth | no  | no  | no  |
| france  | plectanocotyle gurnardi        | Helminth | no  | no  | no  |
| france  | naegleria fowleri              | Protozoa | yes | no  | no  |
| france  | diplozoon paradoxum            | Helminth | no  | no  | no  |
| france  | gyrodactylus teuchis           | Helminth | no  | no  | no  |
| france  | proteus penneri                | Bacteria | yes | yes | no  |
| france  | mycobacterium canettii         | Bacteria | no  | no  | no  |
| france  | human herpesvirus 1            | Virus    | no  | no  | no  |
| france  | graphidium strigosum           | Helminth | no  | no  | no  |
| france  | malassezia pachydermatis       | Fungi    | yes | yes | yes |
| france  | vibrio alginolyticus           | Bacteria | yes | yes | no  |
| france  | bluetongue virus               | Virus    | no  | no  | no  |
| france  | diplozoon nipponicum           | Helminth | no  | no  | no  |
| france  | bordetella bronchiseptica      | Bacteria | yes | yes | no  |
| france  | corynebacterium amycolatum     | Bacteria | yes | no  | yes |
| france  | pepper mild mottle virus       | Virus    | no  | no  | no  |
| france  | burkholderia cepacia           | Bacteria | yes | no  | no  |
| france  | human immunodeficiency virus 2 | Virus    | yes | no  | yes |
| france  | preussia australis             | Fungi    | no  | no  | no  |
| france  | proteus mirabilis              | Bacteria | yes | yes | no  |
| france  | hafnia alvei                   | Bacteria | yes | yes | no  |
| france  | teladorsagia circumcincta      | Helminth | yes | yes | no  |
| france  | staphylococcus saprophyticus   | Bacteria | yes | no  | no  |
| france  | pseudomonas chlororaphis       | Bacteria | no  | no  | no  |
| france  | hexabothrium appendiculatum    | Helminth | no  | no  | no  |
| france  | polystoma gallieni             | Helminth | no  | no  | no  |
| france  | kluveria ascorbata             | Bacteria | yes | yes | no  |
| france  | lamellogasterium drummondi     | Helminth | no  | no  | no  |
| france  | plectanocotyloides obscurum    | Helminth | no  | no  | no  |
| france  | classical swine fever virus    | Virus    | no  | no  | no  |
| france  | gibberella moniliformis        | Fungi    | no  | no  | no  |
| france  | theileria annulata             | Protozoa | no  | no  | no  |
| france  | lamellogasterium obeliae       | Helminth | no  | no  | no  |
| france  | suid herpesvirus 1             | Virus    | no  | no  | no  |
| france  | trichobilharzia franki         | Helminth | no  | no  | no  |
| france  | sinorhizobium medicae          | Bacteria | no  | no  | no  |
| france  | naegleria australiensis        | Protozoa | no  | no  | no  |
| france  | legionella anisa               | Bacteria | yes | no  | no  |
| france  | nosema ceranae                 | Fungi    | no  | no  | no  |
| france  | vaccinia virus                 | Virus    | no  | no  | no  |
| france  | rabies virus                   | Virus    | yes | yes | yes |
| france  | diplozoon homoion              | Helminth | no  | no  | no  |
| france  | eimeria flavescens             | Protozoa | no  | no  | no  |
| france  | vibrio crassostreae            | Bacteria | no  | no  | no  |
| france  | west nile virus                | Virus    | yes | yes | yes |
| france  | alaria alata                   | Helminth | no  | no  | no  |
| france  | corynebacterium macginleyi     | Bacteria | yes | no  | no  |

|        |                                    |          |     |     |     |
|--------|------------------------------------|----------|-----|-----|-----|
| france | hepatitis e virus                  | Virus    | yes | yes | yes |
| france | marshallagia marshalli             | Helminth | yes | yes | no  |
| france | aeromonas hydrophila               | Bacteria | yes | yes | yes |
| france | escherichia coli                   | Bacteria | yes | yes | yes |
| france | jc polyomavirus                    | Virus    | no  | no  | no  |
| france | eudiplozoon nipponicum             | Helminth | no  | no  | no  |
| france | rubella virus                      | Virus    | yes | no  | no  |
| france | cordyceps bassiana                 | Fungi    | no  | no  | no  |
| france | dendritobilharzia pulverulenta     | Helminth | no  | no  | no  |
| france | human papillomavirus 18            | Virus    | no  | no  | no  |
| france | babesia caballi                    | Protozoa | no  | no  | no  |
| france | microcotyle mugilis                | Helminth | no  | no  | no  |
| france | microbacterium paraoxydans         | Bacteria | no  | no  | no  |
| france | yarrowia lipolytica                | Fungi    | no  | no  | no  |
| france | bartonella henselae                | Bacteria | yes | yes | no  |
| france | eimeria exigua                     | Protozoa | no  | no  | no  |
| france | gyrodactylus branchialis           | Helminth | no  | no  | no  |
| france | vesicular exanthema of swine virus | Virus    | no  | no  | no  |
| france | ochrobactrum intermedium           | Bacteria | no  | no  | no  |
| france | pseudomonas aeruginosa             | Bacteria | yes | yes | yes |
| france | eimeria intestinalis               | Protozoa | no  | no  | no  |
| france | trichoderma atroviride             | Fungi    | no  | no  | no  |
| france | litomosoides sigmodontis           | Helminth | no  | no  | no  |
| france | diplozoon bliccae                  | Helminth | no  | no  | no  |
| france | hepatitis b virus                  | Virus    | yes | no  | yes |
| france | human herpesvirus 4                | Virus    | no  | no  | no  |
| france | human herpesvirus 5                | Virus    | yes | no  | yes |
| france | anaplasma phagocytophilum          | Bacteria | no  | no  | no  |
| france | cellulosilyticum ruminicola        | Bacteria | no  | no  | no  |
| france | pseudomonas monteilii              | Bacteria | no  | no  | no  |
| france | trypanosoma rabinowitschae         | Protozoa | no  | no  | no  |
| france | yersinia pseudotuberculosis        | Bacteria | yes | yes | no  |
| france | penicillium marneffeii             | Fungi    | yes | yes | yes |
| france | fowl adenovirus e                  | Virus    | no  | no  | no  |
| france | debaryomyces fabryi                | Fungi    | no  | no  | no  |
| france | rahnella aquatilis                 | Bacteria | yes | no  | no  |
| france | arthrographis kalrae               | Fungi    | no  | no  | no  |
| france | betacoronavirus 1                  | Virus    | no  | no  | no  |
| france | stephanostomum cestillum           | Helminth | no  | no  | no  |
| france | norwalk virus                      | Virus    | yes | no  | yes |
| france | cladosporium cladosporioides       | Fungi    | yes | no  | no  |
| france | robphildollfusium fractum          | Helminth | no  | no  | no  |
| france | canine distemper virus             | Virus    | no  | no  | no  |
| france | bacteroides fragilis               | Bacteria | yes | yes | no  |
| france | rabbit hemorrhagic disease virus   | Virus    | no  | no  | no  |
| france | stephanostomum gaidropsori         | Helminth | no  | no  | no  |
| france | pseudaxine trachuri                | Helminth | no  | no  | no  |
| france | acinetobacter radioresistens       | Bacteria | yes | no  | no  |
| france | pseudomonas fluorescens            | Bacteria | yes | no  | no  |
| france | candida albicans                   | Fungi    | yes | yes | yes |

|        |                                         |          |     |     |     |
|--------|-----------------------------------------|----------|-----|-----|-----|
| france | <i>lactobacillus plantarum</i>          | Bacteria | no  | no  | no  |
| france | <i>klebsiella pneumoniae</i>            | Bacteria | yes | yes | yes |
| france | <i>scedosporium aurantiacum</i>         | Fungi    | no  | no  | no  |
| france | <i>polystoma integerrimum</i>           | Helminth | no  | no  | no  |
| france | <i>dirofilaria repens</i>               | Helminth | yes | yes | no  |
| france | <i>toxoplasma gondii</i>                | Protozoa | yes | yes | yes |
| france | <i>aeromonas allosaccharophila</i>      | Bacteria | no  | no  | no  |
| france | <i>wuchereria bancrofti</i>             | Helminth | yes | no  | yes |
| france | avian metapneumovirus                   | Virus    | no  | no  | no  |
| france | <i>saccharomyces cerevisiae</i>         | Fungi    | yes | no  | no  |
| france | <i>mycoplasma haemofelis</i>            | Bacteria | no  | no  | no  |
| france | human enterovirus a                     | Virus    | yes | no  | no  |
| france | <i>capronia semiimmersa</i>             | Fungi    | no  | no  | no  |
| france | equid herpesvirus 5                     | Virus    | no  | no  | no  |
| france | <i>trichostrongylus capricola</i>       | Helminth | yes | yes | no  |
| france | <i>bacillus megaterium</i>              | Bacteria | no  | no  | no  |
| france | feline calicivirus                      | Virus    | no  | no  | no  |
| france | foot-and-mouth disease virus            | Virus    | no  | no  | no  |
| france | <i>eimeria coecicola</i>                | Protozoa | no  | no  | no  |
| france | <i>bunostomum trigenocephalum</i>       | Helminth | no  | no  | no  |
| france | <i>klebsiella oxytoca</i>               | Bacteria | yes | yes | no  |
| france | feline panleukopenia virus              | Virus    | no  | no  | no  |
| france | <i>mycobacterium bovis</i>              | Bacteria | yes | yes | yes |
| france | infectious hematopoietic necrosis virus | Virus    | no  | no  | no  |
| france | <i>aspergillus niger</i>                | Fungi    | yes | yes | no  |
| france | seoul virus                             | Virus    | yes | yes | yes |
| france | chikungunya virus                       | Virus    | yes | yes | yes |
| france | <i>schizophyllum commune</i>            | Fungi    | yes | no  | no  |
| france | <i>lactobacillus sakei</i>              | Bacteria | no  | no  | no  |
| france | <i>burkholderia fungorum</i>            | Bacteria | no  | no  | no  |
| france | <i>polylabris heterodus</i>             | Helminth | no  | no  | no  |
| france | <i>chabertia ovina</i>                  | Helminth | no  | no  | no  |
| france | <i>leishmania infantum</i>              | Protozoa | yes | yes | yes |
| france | <i>geosmithia argillacea</i>            | Fungi    | no  | no  | no  |
| france | <i>variovorax paradoxus</i>             | Bacteria | no  | no  | no  |
| france | <i>aeromonas veronii</i>                | Bacteria | yes | no  | yes |
| france | <i>pseudomonas putida</i>               | Bacteria | yes | no  | no  |
| france | <i>vibrio aestuarianus</i>              | Bacteria | no  | no  | no  |
| france | <i>lactobacillus salivarius</i>         | Bacteria | no  | no  | no  |
| france | <i>macvicaria crassigula</i>            | Helminth | no  | no  | no  |
| france | <i>pseudomonas mosselii</i>             | Bacteria | no  | no  | no  |
| france | <i>mycoplasma agalactiae</i>            | Bacteria | no  | no  | no  |
| france | <i>pseudomonas plecoglossicida</i>      | Bacteria | no  | no  | no  |
| france | <i>clostridium difficile</i>            | Bacteria | yes | yes | yes |
| france | <i>yersinia enterocolitica</i>          | Bacteria | yes | yes | yes |
| france | <i>mycobacterium tuberculosis</i>       | Bacteria | yes | yes | yes |
| france | human enterovirus c                     | Virus    | yes | no  | no  |
| france | <i>bacillus cereus</i>                  | Bacteria | yes | yes | no  |
| france | african swine fever virus               | Virus    | no  | no  | no  |
| france | scrapie agent                           | Others   | no  | no  | no  |



|        |                                      |          |     |     |     |
|--------|--------------------------------------|----------|-----|-----|-----|
| france | human immunodeficiency virus 1       | Virus    | yes | no  | yes |
| france | influenza a virus                    | Virus    | yes | yes | yes |
| france | nucleospora salmonis                 | Fungi    | no  | no  | no  |
| france | european catfish virus               | Virus    | no  | no  | no  |
| france | bordetella pertussis                 | Bacteria | yes | no  | yes |
| france | xanthomonas campestris               | Bacteria | no  | no  | no  |
| france | avian orthoreovirus                  | Virus    | no  | no  | no  |
| france | bacillus mycoides                    | Bacteria | yes | no  | no  |
| france | fusarium oxysporum                   | Fungi    | yes | no  | yes |
| france | newcastle disease virus              | Virus    | yes | yes | no  |
| france | borrelia garinii                     | Bacteria | no  | no  | no  |
| france | human enterovirus b                  | Virus    | yes | no  | yes |
| france | yersinia pestis                      | Bacteria | yes | yes | yes |
| france | aliivibrio fischeri                  | Bacteria | no  | no  | no  |
| france | providencia rettgeri                 | Bacteria | yes | yes | no  |
| france | kuhnia scombri                       | Helminth | no  | no  | no  |
| france | agrobacterium tumefaciens            | Bacteria | no  | no  | no  |
| france | caprine arthritis encephalitis virus | Virus    | no  | no  | no  |
| france | listeria innocua                     | Bacteria | no  | no  | no  |
| france | aliivibrio logei                     | Bacteria | no  | no  | no  |
| france | stephanostomum pristin               | Helminth | no  | no  | no  |
| france | pseudallescheria boydii              | Fungi    | no  | no  | no  |
| france | furnestinia echeneis                 | Helminth | no  | no  | no  |
| france | haemonchus placei                    | Helminth | no  | no  | no  |
| france | human parechovirus                   | Virus    | no  | no  | no  |
| france | monkeypox virus                      | Virus    | yes | yes | yes |
| france | hepatitis c virus                    | Virus    | yes | no  | yes |
| france | vibrio cholerae                      | Bacteria | yes | no  | yes |
| france | bothriocephalus acheilognathi        | Helminth | no  | no  | no  |
| france | bartonella clarridgeiae              | Bacteria | no  | no  | no  |
| france | flavobacterium columnare             | Bacteria | no  | no  | no  |
| france | vibrio splendidus                    | Bacteria | no  | no  | no  |
| france | dictyocaulus noerteri                | Helminth | no  | no  | no  |
| france | rotavirus a                          | Virus    | yes | yes | yes |
| france | viral hemorrhagic septicemia virus   | Virus    | no  | no  | no  |
| france | bacillus thuringiensis               | Bacteria | yes | no  | no  |
| france | neocallimastix frontalis             | Fungi    | no  | no  | no  |
| france | tristoma integrum                    | Helminth | no  | no  | no  |
| france | bibersteinia trehalosi               | Bacteria | no  | no  | no  |
| france | murine leukemia virus                | Virus    | no  | no  | no  |
| france | acinetobacter lwoffii                | Bacteria | yes | no  | no  |
| france | bacillus subtilis                    | Bacteria | yes | yes | no  |
| france | kingella kingae                      | Bacteria | yes | no  | no  |
| france | haemophilus influenzae               | Bacteria | yes | no  | yes |
| france | coprinellus domesticus               | Fungi    | no  | no  | no  |
| france | bartonella capreoli                  | Bacteria | no  | no  | no  |
| france | mycoplasma hyopneumoniae             | Bacteria | no  | no  | no  |
| france | neisseria meningitidis               | Bacteria | yes | no  | yes |
| france | enterococcus faecalis                | Bacteria | yes | yes | yes |
| france | taylorella equigenitalis             | Bacteria | no  | no  | no  |

|        |                                    |          |     |     |     |
|--------|------------------------------------|----------|-----|-----|-----|
| france | rickettsia slovacae                | Bacteria | yes | yes | no  |
| france | aeromonas bestiarum                | Bacteria | no  | no  | no  |
| france | aureobasidium pullulans            | Fungi    | yes | no  | no  |
| france | ophiotaenia europaea               | Helminth | no  | no  | no  |
| france | heligmosomoides polygyrus          | Helminth | no  | no  | no  |
| france | staphylococcus cohnii              | Bacteria | no  | no  | no  |
| france | massilia timonae                   | Bacteria | no  | no  | no  |
| france | arthroderma grubyi                 | Fungi    | no  | no  | no  |
| france | staphylococcus equorum             | Bacteria | no  | no  | no  |
| france | bilharziella polonica              | Helminth | yes | yes | no  |
| france | vibrio gigantis                    | Bacteria | no  | no  | no  |
| france | salmon pancreas disease virus      | Virus    | no  | no  | no  |
| france | borrelia burgdorferi               | Bacteria | yes | yes | yes |
| france | epidermophyton floccosum           | Fungi    | yes | yes | no  |
| france | mycobacterium conceptionense       | Bacteria | no  | no  | no  |
| france | microbacterium phyllosphaerae      | Bacteria | no  | no  | no  |
| france | acanthamoeba lenticulata           | Protozoa | no  | no  | no  |
| france | brucella suis                      | Bacteria | yes | yes | no  |
| france | streptococcus equinus              | Bacteria | no  | no  | no  |
| france | bk polyomavirus                    | Virus    | no  | no  | no  |
| france | babesia divergens                  | Protozoa | yes | yes | no  |
| france | european brown hare syndrome virus | Virus    | no  | no  | no  |
| france | aichi virus                        | Virus    | no  | no  | no  |
| france | streptococcus pneumoniae           | Bacteria | yes | yes | yes |
| france | torque teno mini virus 8           | Virus    | no  | no  | no  |
| france | helicobacter pylori                | Bacteria | yes | yes | no  |
| france | lymphocytic choriomeningitis virus | Virus    | yes | yes | no  |
| france | oesophagostomum venulosum          | Helminth | no  | no  | no  |
| france | serratia marcescens                | Bacteria | yes | yes | yes |
| france | enterobacter cloacae               | Bacteria | yes | yes | no  |
| france | trypanosoma pestanaei              | Protozoa | no  | no  | no  |
| france | listeria seeligeri                 | Bacteria | yes | yes | no  |
| france | bordetella parapertussis           | Bacteria | yes | yes | no  |
| france | trichinella britovi                | Helminth | yes | yes | no  |
| france | bartonella alsatica                | Bacteria | no  | no  | no  |
| france | human parvovirus b19               | Virus    | no  | no  | no  |
| france | nematodirus spathiger              | Helminth | no  | no  | no  |
| france | sparicotyle chrysophryii           | Helminth | no  | no  | no  |
| france | stephanostomum minutum             | Helminth | no  | no  | no  |
| france | macvicaria maillardi               | Helminth | no  | no  | no  |
| france | primate t-lymphotropic virus 1     | Virus    | no  | no  | no  |
| france | human coronavirus nl63             | Virus    | no  | no  | no  |
| france | coprinopsis cinerea                | Fungi    | no  | no  | no  |
| france | equid herpesvirus 1                | Virus    | no  | no  | no  |
| france | measles virus                      | Virus    | yes | yes | yes |
| france | human parainfluenza virus 2        | Virus    | yes | no  | no  |
| france | pomphorhynchus laevis              | Helminth | no  | no  | no  |
| france | plasmodium vivax                   | Protozoa | yes | no  | yes |
| france | gastrocotyle trachuri              | Helminth | no  | no  | no  |
| france | staphylococcus caprae              | Bacteria | no  | no  | no  |

|        |                               |          |     |     |     |
|--------|-------------------------------|----------|-----|-----|-----|
| france | taenia saginata               | Helminth | yes | yes | no  |
| france | capsala onchidiocotyle        | Helminth | no  | no  | no  |
| france | human herpesvirus 8           | Virus    | yes | no  | yes |
| france | brucella ovis                 | Bacteria | no  | no  | no  |
| france | dirofilaria immitis           | Helminth | yes | yes | no  |
| france | dictyocaulus filaria          | Helminth | no  | no  | no  |
| france | citrobacter freundii          | Bacteria | yes | yes | no  |
| france | human metapneumovirus         | Virus    | no  | no  | no  |
| france | gardnerella vaginalis         | Bacteria | yes | no  | no  |
| france | cowpox virus                  | Virus    | yes | yes | no  |
| france | eimeria media                 | Protozoa | no  | no  | no  |
| france | schistosoma mansoni           | Helminth | yes | yes | yes |
| france | spiculoptera spiculoptera     | Helminth | no  | no  | no  |
| france | pyragraphorus hollisae        | Helminth | no  | no  | no  |
| france | mecistocirrus digitatus       | Helminth | yes | yes | no  |
| france | rickettsia felis              | Bacteria | yes | yes | no  |
| france | bacillus anthracis            | Bacteria | yes | yes | yes |
| france | mycobacterium bolletii        | Bacteria | no  | no  | no  |
| france | fusarium solani               | Fungi    | yes | yes | yes |
| france | tridontophorus serratus       | Helminth | no  | no  | no  |
| france | human herpesvirus 2           | Virus    | no  | no  | no  |
| france | gyrodactylus ostendicus       | Helminth | no  | no  | no  |
| france | taylorella asinigenitalis     | Bacteria | no  | no  | no  |
| france | citrobacter koseri            | Bacteria | yes | yes | no  |
| france | chlamydomyxa psittaci         | Bacteria | yes | yes | no  |
| france | borrelia spielmanii           | Bacteria | no  | no  | no  |
| france | diphyllobothrium latum        | Helminth | yes | yes | no  |
| france | meyerozyma guilliermondii     | Fungi    | no  | no  | no  |
| france | staphylococcus sciuri         | Bacteria | no  | no  | no  |
| france | influenza b virus             | Virus    | yes | yes | no  |
| france | bifidobacterium animalis      | Bacteria | no  | no  | no  |
| france | avian coronavirus             | Virus    | no  | no  | no  |
| france | enterococcus faecium          | Bacteria | yes | yes | yes |
| france | micrococcus luteus            | Bacteria | no  | no  | no  |
| france | clostridium botulinum         | Bacteria | yes | yes | yes |
| france | haemonchus contortus          | Helminth | yes | yes | no  |
| france | mycobacterium pinnipedii      | Bacteria | no  | no  | no  |
| france | ochrobactrum anthropi         | Bacteria | yes | no  | no  |
| france | dengue virus                  | Virus    | no  | no  | no  |
| france | echinococcus multilocularis   | Helminth | yes | yes | no  |
| france | pantoea agglomerans           | Bacteria | yes | yes | no  |
| france | malassezia slooffiae          | Fungi    | no  | no  | no  |
| france | providencia alcalifaciens     | Bacteria | yes | yes | no  |
| france | pagellicotyle mormyri         | Helminth | no  | no  | no  |
| france | scedosporium apiospermum      | Fungi    | no  | no  | no  |
| france | aeromonas media               | Bacteria | no  | no  | no  |
| france | clostridium clostridioforme   | Bacteria | no  | no  | no  |
| france | feline immunodeficiency virus | Virus    | no  | no  | no  |
| france | staphylococcus haemolyticus   | Bacteria | yes | yes | no  |
| france | sapporo virus                 | Virus    | no  | no  | no  |

|        |                                       |          |     |     |     |
|--------|---------------------------------------|----------|-----|-----|-----|
| france | roseburia intestinalis                | Bacteria | no  | no  | no  |
| france | dientamoeba fragilis                  | Protozoa | yes | yes | no  |
| france | entamoeba nuttalli                    | Protozoa | no  | no  | no  |
| france | listeria welshimeri                   | Bacteria | yes | yes | no  |
| france | microcotyle erythrini                 | Helminth | no  | no  | no  |
| france | brucella melitensis                   | Bacteria | yes | yes | yes |
| france | legionella pneumophila                | Bacteria | yes | no  | yes |
| france | eimeria magna                         | Protozoa | no  | no  | no  |
| france | trichobilharzia szidati               | Helminth | no  | no  | no  |
| france | trichomonas vaginalis                 | Protozoa | yes | no  | yes |
| france | mycobacterium austroafricanum         | Bacteria | no  | no  | no  |
| france | babesia canis                         | Protozoa | no  | no  | no  |
| france | pneumocystis carinii                  | Fungi    | yes | yes | yes |
| france | ruminococcus gnavus                   | Bacteria | no  | no  | no  |
| france | equid herpesvirus 2                   | Virus    | no  | no  | no  |
| france | angiostrongylus vasorum               | Helminth | no  | no  | no  |
| france | hexostoma thynni                      | Helminth | no  | no  | no  |
| france | cemocotyle trachuri                   | Helminth | no  | no  | no  |
| france | tetratrachomonas buttreyi             | Protozoa | no  | no  | no  |
| france | eimeria perforans                     | Protozoa | no  | no  | no  |
| france | atrispinum acarne                     | Helminth | no  | no  | no  |
| france | grubea cochlear                       | Helminth | no  | no  | no  |
| france | nematodirus europaeus                 | Helminth | no  | no  | no  |
| france | listeria monocytogenes                | Bacteria | yes | yes | yes |
| france | neisseria gonorrhoeae                 | Bacteria | yes | no  | yes |
| france | mycobacterium riyadhense              | Bacteria | no  | no  | no  |
| france | pseudomonas fragi                     | Bacteria | no  | no  | no  |
| france | trochopus pini                        | Helminth | no  | no  | no  |
| france | cryptosporidium parvum                | Protozoa | yes | yes | yes |
| france | turkey astrovirus                     | Virus    | no  | no  | no  |
| france | infectious pancreatic necrosis virus  | Virus    | no  | no  | no  |
| france | human coronavirus hku1                | Virus    | no  | no  | no  |
| france | candida dubliniensis                  | Fungi    | yes | no  | no  |
| france | lymphocystis disease virus 1          | Virus    | no  | no  | no  |
| france | ostertagia leptospicularis            | Helminth | no  | no  | no  |
| france | aeromonas simiae                      | Bacteria | no  | no  | no  |
| france | borna disease virus                   | Virus    | yes | yes | no  |
| france | aggregatibacter actinomycetemcomitans | Bacteria | no  | no  | no  |
| france | streptococcus uberis                  | Bacteria | yes | yes | no  |
| france | plasmodium falciparum                 | Protozoa | yes | no  | yes |
| france | sandfly fever naples virus            | Virus    | yes | yes | yes |
| france | leishmania donovani                   | Protozoa | yes | yes | yes |
| france | cryptococcus gattii                   | Fungi    | no  | no  | no  |
| france | corynebacterium propinquum            | Bacteria | yes | no  | no  |
| france | polystoma pelobatis                   | Helminth | no  | no  | no  |
| france | chlamydia trachomatis                 | Bacteria | yes | yes | yes |
| france | eimeria piriformis                    | Protozoa | no  | no  | no  |
| france | debaryomyces hansenii                 | Fungi    | no  | no  | no  |
| france | goose parvovirus                      | Virus    | no  | no  | no  |
| france | metastrongylus pudendotectus          | Helminth | no  | no  | no  |

|                  |                                |          |     |     |     |
|------------------|--------------------------------|----------|-----|-----|-----|
| france           | hepatitis delta virus          | Virus    | yes | no  | no  |
| france           | eimeria stiedai                | Protozoa | no  | no  | no  |
| france           | listeria ivanovii              | Bacteria | yes | yes | no  |
| france           | babesia capreoli               | Protozoa | no  | no  | no  |
| france           | aeromonas caviae               | Bacteria | yes | yes | yes |
| france           | flavobacterium psychrophilum   | Bacteria | no  | no  | no  |
| france           | campylobacter lari             | Bacteria | yes | yes | no  |
| france           | hepatitis a virus              | Virus    | yes | yes | yes |
| france           | geomyces destructans           | Fungi    | no  | no  | no  |
| france           | cryptococcus neoformans        | Fungi    | yes | yes | yes |
| france           | mycoplasma bovis               | Bacteria | no  | no  | no  |
| france           | ralstonia pickettii            | Bacteria | yes | no  | no  |
| france           | simian immunodeficiency virus  | Virus    | no  | no  | no  |
| france           | diclidophora luscae            | Helminth | no  | no  | no  |
| france           | podospora anserina             | Fungi    | no  | no  | no  |
| france           | ligophorus mugilinus           | Helminth | no  | no  | no  |
| france           | border disease virus           | Virus    | no  | no  | no  |
| france           | malassezia furfur              | Fungi    | yes | yes | no  |
| france           | bacillus licheniformis         | Bacteria | yes | yes | no  |
| france           | pseudomonas poae               | Bacteria | no  | no  | no  |
| france           | european bat lyssavirus 1      | Virus    | yes | yes | no  |
| france           | staphylococcus aureus          | Bacteria | yes | yes | yes |
| france           | fasciola hepatica              | Helminth | yes | yes | no  |
| france           | metamicrocotyla cephalus       | Helminth | no  | no  | no  |
| france           | ashworthius sidemi             | Helminth | no  | no  | no  |
| french guiana    | cupriavidus taiwanensis        | Bacteria | no  | no  | no  |
| french guiana    | toxoplasma gondii              | Protozoa | yes | yes | yes |
| french guiana    | plasmodium falciparum          | Protozoa | yes | no  | yes |
| french guiana    | wetapolystoma almae            | Helminth | no  | no  | no  |
| french guiana    | plasmodium malariae            | Protozoa | yes | yes | no  |
| french guiana    | influenza a virus              | Virus    | yes | yes | yes |
| french guiana    | yellow fever virus             | Virus    | yes | yes | yes |
| french guiana    | leishmania guyanensis          | Protozoa | yes | yes | no  |
| french guiana    | primate t-lymphotropic virus 1 | Virus    | no  | no  | no  |
| french guiana    | mayaro virus                   | Virus    | yes | yes | yes |
| french guiana    | human herpesvirus 8            | Virus    | yes | no  | yes |
| french guiana    | oriboca virus                  | Virus    | yes | yes | no  |
| french guiana    | mycobacterium ulcerans         | Bacteria | yes | yes | yes |
| french guiana    | plasmodium brasilianum         | Protozoa | no  | no  | no  |
| french guiana    | human enterovirus c            | Virus    | yes | no  | no  |
| french guiana    | rabies virus                   | Virus    | yes | yes | yes |
| french guiana    | dengue virus                   | Virus    | no  | no  | no  |
| french guiana    | human immunodeficiency virus 1 | Virus    | yes | no  | yes |
| french guiana    | cardicola orientalis           | Helminth | no  | no  | no  |
| french guiana    | fusarium solani                | Fungi    | yes | yes | yes |
| french guiana    | pieiraia hortae                | Fungi    | yes | yes | no  |
| french guiana    | primate t-lymphotropic virus 2 | Virus    | no  | no  | no  |
| french polynesia | paracoccus zeaxanthinifaciens  | Bacteria | no  | no  | no  |
| french polynesia | wuchereria bancrofti           | Helminth | yes | no  | yes |
| french polynesia | schistorchis zancli            | Helminth | no  | no  | no  |

|                  |                                  |          |     |     |     |
|------------------|----------------------------------|----------|-----|-----|-----|
| french polynesia | human immunodeficiency virus 1   | Virus    | yes | no  | yes |
| french polynesia | dirofilaria immitis              | Helminth | yes | yes | no  |
| french polynesia | staphylococcus aureus            | Bacteria | yes | yes | yes |
| french polynesia | saccharomyces cerevisiae         | Fungi    | yes | no  | no  |
| french polynesia | toxoplasma gondii                | Protozoa | yes | yes | yes |
| french polynesia | preptetos laguncula              | Helminth | no  | no  | no  |
| french polynesia | escherichia coli                 | Bacteria | yes | yes | yes |
| french polynesia | angiostrongylus cantonensis      | Helminth | yes | no  | no  |
| french polynesia | influenza a virus                | Virus    | yes | yes | yes |
| french polynesia | euryhaliotrematoides pirulum     | Helminth | no  | no  | no  |
| french polynesia | mycobacterium leprae             | Bacteria | yes | yes | yes |
| french polynesia | west nile virus                  | Virus    | yes | yes | yes |
| french polynesia | dengue virus                     | Virus    | no  | no  | no  |
| french polynesia | enenterum aureum                 | Helminth | no  | no  | no  |
| french polynesia | human herpesvirus 4              | Virus    | no  | no  | no  |
| french polynesia | leptospira interrogans           | Bacteria | yes | yes | yes |
| french polynesia | neohyocreadium dorsoporum        | Helminth | no  | no  | no  |
| french polynesia | plasmodium relictum              | Protozoa | no  | no  | no  |
| french polynesia | streptococcus pyogenes           | Bacteria | yes | yes | yes |
| french polynesia | haemophilus influenzae           | Bacteria | yes | no  | yes |
| french polynesia | mycobacterium tuberculosis       | Bacteria | yes | yes | yes |
| french polynesia | neisseria gonorrhoeae            | Bacteria | yes | no  | yes |
| french polynesia | machidatrema chilostoma          | Helminth | no  | no  | no  |
| french polynesia | hepatitis b virus                | Virus    | yes | no  | yes |
| french polynesia | human immunodeficiency virus 2   | Virus    | yes | no  | yes |
| french polynesia | primate t-lymphotropic virus 1   | Virus    | no  | no  | no  |
| french polynesia | haliotrema scyphovagina          | Helminth | no  | no  | no  |
| french polynesia | chlamydia trachomatis            | Bacteria | yes | yes | yes |
| french polynesia | brucella suis                    | Bacteria | yes | yes | no  |
| french polynesia | aliatrema cribbi                 | Helminth | no  | no  | no  |
| french polynesia | clostridium perfringens          | Bacteria | yes | yes | no  |
| french polynesia | helicobacter pylori              | Bacteria | yes | yes | no  |
| french polynesia | euryhaliotrematoides berenguelae | Helminth | no  | no  | no  |
| gabon            | plasmodium falciparum            | Protozoa | yes | no  | yes |
| gabon            | simian immunodeficiency virus    | Virus    | no  | no  | no  |
| gabon            | enterocytozoon bienuesi          | Fungi    | yes | no  | yes |
| gabon            | hepatitis delta virus            | Virus    | yes | no  | no  |
| gabon            | human immunodeficiency virus 1   | Virus    | yes | no  | yes |
| gabon            | plasmodium gonderi               | Protozoa | no  | no  | no  |
| gabon            | peste-des-petits-ruminants virus | Virus    | no  | no  | no  |
| gabon            | human immunodeficiency virus 2   | Virus    | yes | no  | yes |
| gabon            | staphylococcus aureus            | Bacteria | yes | yes | yes |
| gabon            | strongyloides fuelleborni        | Helminth | yes | yes | no  |
| gabon            | hepatitis c virus                | Virus    | yes | no  | yes |
| gabon            | plasmodium elongatum             | Protozoa | no  | no  | no  |
| gabon            | human herpesvirus 8              | Virus    | yes | no  | yes |
| gabon            | klebsiella pneumoniae            | Bacteria | yes | yes | yes |
| gabon            | enterobacter asburiae            | Bacteria | yes | yes | no  |
| gabon            | bovine leukemia virus            | Virus    | no  | no  | no  |
| gabon            | monkeypox virus                  | Virus    | yes | yes | yes |

|         |                                |          |     |     |     |
|---------|--------------------------------|----------|-----|-----|-----|
| gabon   | cercopithifilaria roussilhoni  | Helminth | no  | no  | no  |
| gabon   | plasmodium atheruri            | Protozoa | no  | no  | no  |
| gabon   | primate t-lymphotropic virus 1 | Virus    | no  | no  | no  |
| gabon   | plasmodium gaboni              | Protozoa | no  | no  | no  |
| gabon   | macacine herpesvirus 5         | Virus    | no  | no  | no  |
| gabon   | plasmodium ovale               | Protozoa | yes | no  | no  |
| gabon   | hepatitis b virus              | Virus    | yes | no  | yes |
| gabon   | simian foamy virus             | Virus    | no  | no  | no  |
| gabon   | neisseria gonorrhoeae          | Bacteria | yes | no  | yes |
| gabon   | measles virus                  | Virus    | yes | yes | yes |
| gabon   | escherichia coli               | Bacteria | yes | yes | yes |
| gabon   | zaire ebolavirus               | Virus    | yes | yes | yes |
| gambia  | neisseria meningitidis         | Bacteria | yes | no  | yes |
| gambia  | hepatitis b virus              | Virus    | yes | no  | yes |
| gambia  | human herpesvirus 8            | Virus    | yes | no  | yes |
| gambia  | trypanosoma simiae             | Protozoa | no  | no  | no  |
| gambia  | human immunodeficiency virus 1 | Virus    | yes | no  | yes |
| gambia  | hepatitis delta virus          | Virus    | yes | no  | no  |
| gambia  | human immunodeficiency virus 2 | Virus    | yes | no  | yes |
| gambia  | african swine fever virus      | Virus    | no  | no  | no  |
| gambia  | plasmodium falciparum          | Protozoa | yes | no  | yes |
| gambia  | yellow fever virus             | Virus    | yes | yes | yes |
| gambia  | trypanosoma congolense         | Protozoa | no  | no  | no  |
| gambia  | foot-and-mouth disease virus   | Virus    | no  | no  | no  |
| gambia  | streptococcus pyogenes         | Bacteria | yes | yes | yes |
| gambia  | helicobacter pylori            | Bacteria | yes | yes | no  |
| gambia  | trypanosoma grayi              | Protozoa | no  | no  | no  |
| gambia  | measles virus                  | Virus    | yes | yes | yes |
| georgia | bartonella quintana            | Bacteria | yes | no  | no  |
| georgia | african swine fever virus      | Virus    | no  | no  | no  |
| georgia | bartonella elizabethae         | Bacteria | yes | yes | no  |
| georgia | eperythrozoon parvum           | Bacteria | no  | no  | no  |
| georgia | human enterovirus c            | Virus    | yes | no  | no  |
| georgia | rickettsia typhi               | Bacteria | yes | yes | no  |
| georgia | leishmania infantum            | Protozoa | yes | yes | yes |
| georgia | yersinia pestis                | Bacteria | yes | yes | yes |
| georgia | human enterovirus a            | Virus    | yes | no  | no  |
| georgia | enterococcus faecium           | Bacteria | yes | yes | yes |
| georgia | lactobacillus delbrueckii      | Bacteria | no  | no  | no  |
| georgia | shigella dysenteriae           | Bacteria | yes | yes | yes |
| georgia | human enterovirus b            | Virus    | yes | no  | yes |
| georgia | rabies virus                   | Virus    | yes | yes | yes |
| georgia | staphylococcus aureus          | Bacteria | yes | yes | yes |
| georgia | human parvovirus b19           | Virus    | no  | no  | no  |
| georgia | bartonella tribocorum          | Bacteria | no  | no  | no  |
| georgia | human immunodeficiency virus 1 | Virus    | yes | no  | yes |
| germany | lactobacillus amylovorus       | Bacteria | no  | no  | no  |
| germany | human papillomavirus 10        | Virus    | no  | no  | no  |
| germany | trichobilharzia ocellata       | Helminth | yes | yes | no  |
| germany | trichosporon mucoides          | Fungi    | yes | yes | no  |

|         |                                         |          |     |     |     |
|---------|-----------------------------------------|----------|-----|-----|-----|
| germany | <i>lactobacillus acidophilus</i>        | Bacteria | no  | no  | no  |
| germany | <i>cyathostomum pateratum</i>           | Helminth | no  | no  | no  |
| germany | <i>staphylococcus hominis</i>           | Bacteria | no  | no  | no  |
| germany | <i>clostridium celerecrescens</i>       | Bacteria | no  | no  | no  |
| germany | human adenovirus f                      | Virus    | yes | no  | no  |
| germany | duck hepatitis b virus                  | Virus    | no  | no  | no  |
| germany | <i>enterobacter ludwigii</i>            | Bacteria | no  | no  | no  |
| germany | heron hepatitis b virus                 | Virus    | no  | no  | no  |
| germany | <i>hafnia alvei</i>                     | Bacteria | yes | yes | no  |
| germany | <i>yarrowia lipolytica</i>              | Fungi    | no  | no  | no  |
| germany | <i>agrobacterium tumefaciens</i>        | Bacteria | no  | no  | no  |
| germany | <i>staphylococcus pasteurii</i>         | Bacteria | no  | no  | no  |
| germany | human herpesvirus 5                     | Virus    | yes | no  | yes |
| germany | <i>mycoplasma hominis</i>               | Bacteria | yes | no  | no  |
| germany | <i>nosema ceranae</i>                   | Fungi    | no  | no  | no  |
| germany | jc polyomavirus                         | Virus    | no  | no  | no  |
| germany | psittacid herpesvirus 1                 | Virus    | no  | no  | no  |
| germany | <i>bacillus pumilus</i>                 | Bacteria | yes | no  | no  |
| germany | <i>fusobacterium periodonticum</i>      | Bacteria | yes | no  | no  |
| germany | <i>haemophilus parahaemolyticus</i>     | Bacteria | yes | no  | no  |
| germany | <i>escherichia coli</i>                 | Bacteria | yes | yes | yes |
| germany | <i>avibacterium paragallinarum</i>      | Bacteria | no  | no  | no  |
| germany | <i>fusobacterium nucleatum</i>          | Bacteria | yes | yes | no  |
| germany | classical swine fever virus             | Virus    | no  | no  | no  |
| germany | bovine leukemia virus                   | Virus    | no  | no  | no  |
| germany | <i>babesia microti</i>                  | Protozoa | yes | yes | yes |
| germany | human herpesvirus 1                     | Virus    | no  | no  | no  |
| germany | <i>pasteurella multocida</i>            | Bacteria | yes | yes | no  |
| germany | <i>cordyceps bassiana</i>               | Fungi    | no  | no  | no  |
| germany | <i>aspergillus terreus</i>              | Fungi    | no  | no  | no  |
| germany | <i>clavospora lusitaniae</i>            | Fungi    | no  | no  | no  |
| germany | <i>colletotrichum dematium</i>          | Fungi    | yes | no  | no  |
| germany | <i>klebsiella pneumoniae</i>            | Bacteria | yes | yes | yes |
| germany | <i>burkholderia fungorum</i>            | Bacteria | no  | no  | no  |
| germany | human parvovirus b19                    | Virus    | no  | no  | no  |
| germany | feline calicivirus                      | Virus    | no  | no  | no  |
| germany | hepatitis e virus                       | Virus    | yes | yes | yes |
| germany | <i>penicillium biourgeianum</i>         | Fungi    | no  | no  | no  |
| germany | <i>bordetella petrii</i>                | Bacteria | no  | no  | no  |
| germany | <i>corynebacterium ulcerans</i>         | Bacteria | yes | yes | no  |
| germany | infectious hematopoietic necrosis virus | Virus    | no  | no  | no  |
| germany | human herpesvirus 3                     | Virus    | no  | no  | no  |
| germany | <i>enterobacter kobei</i>               | Bacteria | no  | no  | no  |
| germany | <i>scedosporium aurantiacum</i>         | Fungi    | no  | no  | no  |
| germany | <i>bordetella bronchiseptica</i>        | Bacteria | yes | yes | no  |
| germany | <i>streptococcus gallolyticus</i>       | Bacteria | no  | no  | no  |
| germany | porcine type-c oncovirus                | Virus    | no  | no  | no  |
| germany | <i>acinetobacter baumannii</i>          | Bacteria | yes | no  | no  |
| germany | <i>brucella ovis</i>                    | Bacteria | no  | no  | no  |
| germany | <i>cellulosimicrobium cellulans</i>     | Bacteria | no  | no  | no  |



|         |                            |          |     |     |     |
|---------|----------------------------|----------|-----|-----|-----|
| germany | legionella anisa           | Bacteria | yes | no  | no  |
| germany | bacillus subtilis          | Bacteria | yes | yes | no  |
| germany | bacillus amyloliquefaciens | Bacteria | no  | no  | no  |
| germany | lysinibacillus fusiformis  | Bacteria | no  | no  | no  |
| germany | staphylococcus aureus      | Bacteria | yes | yes | yes |
| germany | acanthamoeba polyphaga     | Protozoa | yes | no  | no  |
| germany | human adenovirus d         | Virus    | yes | no  | no  |
| germany | enterobacter asburiae      | Bacteria | yes | yes | no  |
| germany | pseudomonas fluorescens    | Bacteria | yes | no  | no  |
| germany | bacillus megaterium        | Bacteria | no  | no  | no  |
| germany | hammondia heydorni         | Protozoa | no  | no  | no  |
| germany | bk polyomavirus            | Virus    | no  | no  | no  |
| germany | lactobacillus rhamnosus    | Bacteria | no  | no  | no  |
| germany | mycobacterium marinum      | Bacteria | yes | yes | yes |
| germany | pseudallescheria boydii    | Fungi    | no  | no  | no  |
| germany | rotavirus d                | Virus    | yes | yes | no  |
| germany | bordetella trematum        | Bacteria | no  | no  | no  |
| germany | reptilian orthoreovirus    | Virus    | no  | no  | no  |
| germany | pepper mild mottle virus   | Virus    | no  | no  | no  |
| germany | debaryomyces fabryi        | Fungi    | no  | no  | no  |
| germany | chlamydomyces psittaci     | Bacteria | yes | yes | no  |
| germany | borrelia afzelii           | Bacteria | no  | no  | no  |
| germany | cyathostomum catinatum     | Helminth | no  | no  | no  |
| germany | yokenella regensburgei     | Bacteria | no  | no  | no  |
| germany | bartonella schoenbuchensis | Bacteria | no  | no  | no  |
| germany | cetacean morbillivirus     | Virus    | no  | no  | no  |
| germany | achromobacter xylosoxidans | Bacteria | yes | no  | no  |
| germany | enterobacter hormaechei    | Bacteria | yes | yes | no  |
| germany | feline panleukopenia virus | Virus    | no  | no  | no  |
| germany | sporothrix mexicana        | Fungi    | no  | no  | no  |
| germany | measles virus              | Virus    | yes | yes | yes |
| germany | taenia taeniaeformis       | Helminth | yes | yes | no  |
| germany | trypanosoma theileri       | Protozoa | no  | no  | no  |
| germany | pseudomonas aeruginosa     | Bacteria | yes | yes | yes |
| germany | rabies virus               | Virus    | yes | yes | yes |
| germany | dictyocaulus viviparus     | Helminth | no  | no  | no  |
| germany | lactobacillus sakei        | Bacteria | no  | no  | no  |
| germany | rickettsia helvetica       | Bacteria | yes | no  | no  |
| germany | penicillium chrysogenum    | Fungi    | yes | no  | no  |
| germany | yersinia enterocolitica    | Bacteria | yes | yes | yes |
| germany | malassezia globosa         | Fungi    | yes | yes | no  |
| germany | microbacterium foliorum    | Bacteria | no  | no  | no  |
| germany | lactobacillus reuteri      | Bacteria | no  | no  | no  |
| germany | delftia tsuruhatensis      | Bacteria | no  | no  | no  |
| germany | human adenovirus c         | Virus    | yes | no  | no  |
| germany | saccharomyces cerevisiae   | Fungi    | yes | no  | no  |
| germany | babesia divergens          | Protozoa | yes | yes | no  |
| germany | psychrobacter glacincola   | Bacteria | no  | no  | no  |
| germany | brachyspira hyodysenteriae | Bacteria | no  | no  | no  |
| germany | mycoplasma suis            | Bacteria | no  | no  | no  |

|         |                                    |          |     |     |     |
|---------|------------------------------------|----------|-----|-----|-----|
| germany | european catfish virus             | Virus    | no  | no  | no  |
| germany | human papillomavirus 16            | Virus    | no  | no  | no  |
| germany | sporothrix albicans                | Fungi    | no  | no  | no  |
| germany | pseudomonas luteola                | Bacteria | no  | no  | no  |
| germany | staphylococcus simulans            | Bacteria | no  | no  | no  |
| germany | anguillicoloides crassus           | Helminth | no  | no  | no  |
| germany | yersinia pseudotuberculosis        | Bacteria | yes | yes | no  |
| germany | human enterovirus b                | Virus    | yes | no  | yes |
| germany | aureobasidium pullulans            | Fungi    | yes | no  | no  |
| germany | primate t-lymphotropic virus 1     | Virus    | no  | no  | no  |
| germany | torque teno sus virus 1            | Virus    | no  | no  | no  |
| germany | labiosimplex australis             | Helminth | no  | no  | no  |
| germany | neospora caninum                   | Protozoa | no  | no  | no  |
| germany | schizophyllum commune              | Fungi    | yes | no  | no  |
| germany | mycobacterium avium                | Bacteria | yes | yes | yes |
| germany | erwinia persicina                  | Bacteria | no  | no  | no  |
| germany | staphylococcus lentus              | Bacteria | no  | no  | no  |
| germany | bacillus mycoides                  | Bacteria | yes | no  | no  |
| germany | chicken astrovirus                 | Virus    | no  | no  | no  |
| germany | penicillium commune                | Fungi    | yes | no  | no  |
| germany | cylicocyclus nassatus              | Helminth | no  | no  | no  |
| germany | microbacterium phyllosphaerae      | Bacteria | no  | no  | no  |
| germany | escherichia albertii               | Bacteria | no  | no  | no  |
| germany | citrobacter freundii               | Bacteria | yes | yes | no  |
| germany | cladosporium bruhnei               | Fungi    | no  | no  | no  |
| germany | lactobacillus casei                | Bacteria | no  | no  | no  |
| germany | raoultella ornithinolytica         | Bacteria | no  | no  | no  |
| germany | trichoderma longibrachiatum        | Fungi    | no  | no  | no  |
| germany | porcine parvovirus                 | Virus    | no  | no  | no  |
| germany | shigella dysenteriae               | Bacteria | yes | yes | yes |
| germany | avibacterium gallinarum            | Bacteria | no  | no  | no  |
| germany | mumps virus                        | Virus    | yes | no  | no  |
| germany | caprine herpesvirus 2              | Virus    | no  | no  | no  |
| germany | enterobacter cloacae               | Bacteria | yes | yes | no  |
| germany | beak and feather disease virus     | Virus    | no  | no  | no  |
| germany | lactobacillus brevis               | Bacteria | no  | no  | no  |
| germany | microbacterium oxydans             | Bacteria | no  | no  | no  |
| germany | rhodotorula mucilaginosa           | Fungi    | yes | yes | no  |
| germany | human metapneumovirus              | Virus    | no  | no  | no  |
| germany | bacteroides vulgatus               | Bacteria | yes | no  | no  |
| germany | salmonella enterica                | Bacteria | no  | no  | no  |
| germany | corynebacterium pseudotuberculosis | Bacteria | yes | yes | no  |
| germany | moraxella osloensis                | Bacteria | yes | no  | no  |
| germany | pseudallescheria minutispora       | Fungi    | no  | no  | no  |
| germany | klebsiella oxytoca                 | Bacteria | yes | yes | no  |
| germany | babesia equi                       | Protozoa | no  | no  | no  |
| germany | micrococcus luteus                 | Bacteria | no  | no  | no  |
| germany | yersinia kristensenii              | Bacteria | yes | yes | no  |
| germany | equid herpesvirus 1                | Virus    | no  | no  | no  |
| germany | staphylococcus warneri             | Bacteria | yes | yes | no  |

|         |                                |          |     |     |     |
|---------|--------------------------------|----------|-----|-----|-----|
| germany | pneumocystis jirovecii         | Fungi    | no  | no  | no  |
| germany | foot-and-mouth disease virus   | Virus    | no  | no  | no  |
| germany | newcastle disease virus        | Virus    | yes | yes | no  |
| germany | metorchis bilis                | Helminth | no  | no  | no  |
| germany | malikia granosa                | Bacteria | no  | no  | no  |
| germany | anoplocephala perfoliata       | Helminth | no  | no  | no  |
| germany | pseudomonas stutzeri           | Bacteria | yes | no  | no  |
| germany | pseudoterranova decipiens      | Helminth | yes | no  | no  |
| germany | comamonas testosteroni         | Bacteria | yes | no  | no  |
| germany | mannheimia haemolytica         | Bacteria | no  | no  | no  |
| germany | tick-borne encephalitis virus  | Virus    | no  | no  | no  |
| germany | kytocooccus schroeteri         | Bacteria | no  | no  | no  |
| germany | ectromelia virus               | Virus    | no  | no  | no  |
| germany | cryptosporidium saurophilum    | Protozoa | no  | no  | no  |
| germany | enterococcus faecium           | Bacteria | yes | yes | yes |
| germany | aeromonas media                | Bacteria | no  | no  | no  |
| germany | torque teno sus virus 2        | Virus    | no  | no  | no  |
| germany | pseudomonas brenneri           | Bacteria | no  | no  | no  |
| germany | entamoeba coli                 | Protozoa | no  | no  | no  |
| germany | lake victoria marburgvirus     | Virus    | no  | no  | no  |
| germany | pantoea agglomerans            | Bacteria | yes | yes | no  |
| germany | histomonas meleagridis         | Protozoa | no  | no  | no  |
| germany | ovine herpesvirus 2            | Virus    | no  | no  | no  |
| germany | fusarium solani                | Fungi    | yes | yes | yes |
| germany | human enterovirus a            | Virus    | yes | no  | no  |
| germany | human enterovirus c            | Virus    | yes | no  | no  |
| germany | neisseria lactamica            | Bacteria | yes | no  | no  |
| germany | plectosphaerella cucumerina    | Fungi    | no  | no  | no  |
| germany | myrmecridium schulzeri         | Fungi    | no  | no  | no  |
| germany | borrelia spielmanii            | Bacteria | no  | no  | no  |
| germany | bovine viral diarrhea virus 1  | Virus    | no  | no  | no  |
| germany | human immunodeficiency virus 1 | Virus    | yes | no  | yes |
| germany | rickettsia slovaca             | Bacteria | yes | yes | no  |
| germany | trichobilharzia szidati        | Helminth | no  | no  | no  |
| germany | shewanella baltica             | Bacteria | no  | no  | no  |
| germany | gallibacterium anatis          | Bacteria | no  | no  | no  |
| germany | plasmodium falciparum          | Protozoa | yes | no  | yes |
| germany | rhodococcus equi               | Bacteria | yes | yes | no  |
| germany | bacillus thuringiensis         | Bacteria | yes | no  | no  |
| germany | budvicia aquatica              | Bacteria | no  | no  | no  |
| germany | rhodococcus fascians           | Bacteria | yes | no  | no  |
| germany | staphylococcus kloosii         | Bacteria | no  | no  | no  |
| germany | kluvera intermedia             | Bacteria | no  | no  | no  |
| germany | staphylococcus intermedius     | Bacteria | yes | yes | no  |
| germany | mycobacterium fortuitum        | Bacteria | no  | no  | no  |
| germany | bunyamwera virus               | Virus    | yes | yes | no  |
| germany | cladosporium sphaerospermum    | Fungi    | no  | no  | no  |
| germany | norwalk virus                  | Virus    | yes | no  | yes |
| germany | lecythophora mutabilis         | Fungi    | yes | no  | no  |
| germany | mesocestoides lineatus         | Helminth | yes | yes | no  |

|         |                                      |          |     |     |     |
|---------|--------------------------------------|----------|-----|-----|-----|
| germany | brevundimonas vesicularis            | Bacteria | yes | no  | no  |
| germany | acremonium kiliense                  | Fungi    | yes | yes | no  |
| germany | cylicocyclus insigne                 | Helminth | no  | no  | no  |
| germany | volucribacter amazonae               | Bacteria | no  | no  | no  |
| germany | rahnella aquatilis                   | Bacteria | yes | no  | no  |
| germany | burkholderia cepacia                 | Bacteria | yes | no  | no  |
| germany | tula virus                           | Virus    | no  | no  | no  |
| germany | mycobacterium tuberculosis           | Bacteria | yes | yes | yes |
| germany | staphylococcus sciuri                | Bacteria | no  | no  | no  |
| germany | betacoronavirus 1                    | Virus    | no  | no  | no  |
| germany | helicobacter pylori                  | Bacteria | yes | yes | no  |
| germany | human parechovirus                   | Virus    | no  | no  | no  |
| germany | cylicostephanus goldi                | Helminth | no  | no  | no  |
| germany | rotavirus a                          | Virus    | yes | yes | yes |
| germany | fluoribacter dumoffii                | Bacteria | yes | no  | no  |
| germany | mycobacterium abscessus              | Bacteria | yes | yes | no  |
| germany | pseudomonas chlororaphis             | Bacteria | no  | no  | no  |
| germany | pseudomonas pseudoalcaligenes        | Bacteria | yes | no  | no  |
| germany | pseudomonas putida                   | Bacteria | yes | no  | no  |
| germany | staphylococcus pseudintermedius      | Bacteria | no  | no  | no  |
| germany | european bat lyssavirus 2            | Virus    | yes | yes | no  |
| germany | streptococcus mitis                  | Bacteria | yes | no  | no  |
| germany | cronobacter sakazakii                | Bacteria | no  | no  | no  |
| germany | aichi virus                          | Virus    | no  | no  | no  |
| germany | streptococcus pneumoniae             | Bacteria | yes | yes | yes |
| germany | legionella pneumophila               | Bacteria | yes | no  | yes |
| germany | human adenovirus a                   | Virus    | yes | no  | no  |
| germany | psychrobacter faecalis               | Bacteria | no  | no  | no  |
| germany | aeromonas bestiarum                  | Bacteria | no  | no  | no  |
| germany | mycobacterium peregrinum             | Bacteria | yes | no  | no  |
| germany | treponema pallidum                   | Bacteria | yes | no  | yes |
| germany | cupriavidus basilensis               | Bacteria | no  | no  | no  |
| germany | variovorax paradoxus                 | Bacteria | no  | no  | no  |
| germany | pediococcus acidilactici             | Bacteria | no  | no  | no  |
| germany | emericella nidulans                  | Fungi    | no  | no  | no  |
| germany | bartonella clarridgeiae              | Bacteria | no  | no  | no  |
| germany | spironucleus salmonis                | Protozoa | no  | no  | no  |
| germany | deefgea chitinilytica                | Bacteria | no  | no  | no  |
| germany | borrelia burgdorferi                 | Bacteria | yes | yes | yes |
| germany | scedosporium apiospermum             | Fungi    | no  | no  | no  |
| germany | chryseobacterium indologenes         | Bacteria | no  | no  | no  |
| germany | cryptococcus neoformans              | Fungi    | yes | yes | yes |
| germany | staphylococcus haemolyticus          | Bacteria | yes | yes | no  |
| germany | corynebacterium pseudodiphtheriticur | Bacteria | no  | no  | no  |
| germany | mycoplasma buteonis                  | Bacteria | no  | no  | no  |
| germany | mucor hiemalis                       | Fungi    | yes | no  | no  |
| germany | bovine viral diarrhea virus 2        | Virus    | no  | no  | no  |
| germany | fowlpox virus                        | Virus    | no  | no  | no  |
| germany | stenotrophomonas maltophilia         | Bacteria | no  | no  | no  |
| germany | propionibacterium acnes              | Bacteria | yes | yes | no  |

|         |                                    |          |     |     |     |
|---------|------------------------------------|----------|-----|-----|-----|
| germany | staphylococcus caprae              | Bacteria | no  | no  | no  |
| germany | volucribacter psittacida           | Bacteria | no  | no  | no  |
| germany | coprinellus micaceus               | Fungi    | no  | no  | no  |
| germany | staphylococcus epidermidis         | Bacteria | yes | yes | yes |
| germany | serratia plymuthica                | Bacteria | yes | no  | no  |
| germany | anaplasma phagocytophilum          | Bacteria | no  | no  | no  |
| germany | european bat lyssavirus 1          | Virus    | yes | yes | no  |
| germany | hepatitis c virus                  | Virus    | yes | no  | yes |
| germany | porcine teschovirus                | Virus    | no  | no  | no  |
| germany | malassezia restricta               | Fungi    | yes | yes | no  |
| germany | cryptosporidium parvum             | Protozoa | yes | yes | yes |
| germany | onchocerca flexuosa                | Helminth | no  | no  | no  |
| germany | taenia crassiceps                  | Helminth | yes | yes | no  |
| germany | lysinibacillus sphaericus          | Bacteria | no  | no  | no  |
| germany | methanobacterium formicicum        | Others   | no  | no  | no  |
| germany | penicillium concentricum           | Fungi    | no  | no  | no  |
| germany | influenza a virus                  | Virus    | yes | yes | yes |
| germany | ovine adenovirus a                 | Virus    | no  | no  | no  |
| germany | usutu virus                        | Virus    | yes | yes | no  |
| germany | borrelia garinii                   | Bacteria | no  | no  | no  |
| germany | ascaris lumbricoides               | Helminth | yes | yes | no  |
| germany | bacillus cereus                    | Bacteria | yes | yes | no  |
| germany | brucella suis                      | Bacteria | yes | yes | no  |
| germany | dobrava-belgrade virus             | Virus    | yes | yes | no  |
| germany | european brown hare syndrome virus | Virus    | no  | no  | no  |
| germany | cowpox virus                       | Virus    | yes | yes | no  |
| germany | aquamicrobium lusatiense           | Bacteria | no  | no  | no  |
| germany | fowl adenovirus c                  | Virus    | no  | no  | no  |
| germany | lactobacillus paracasei            | Bacteria | no  | no  | no  |
| germany | echinococcus multilocularis        | Helminth | yes | yes | no  |
| germany | ralstonia pickettii                | Bacteria | yes | no  | no  |
| germany | bovine foamy virus                 | Virus    | no  | no  | no  |
| germany | human immunodeficiency virus 2     | Virus    | yes | no  | yes |
| germany | raoultella terrigena               | Bacteria | no  | no  | no  |
| germany | alcaligenes faecalis               | Bacteria | no  | no  | no  |
| germany | aeromonas hydrophila               | Bacteria | yes | yes | yes |
| germany | sapporo virus                      | Virus    | no  | no  | no  |
| germany | ochrobactrum anthropi              | Bacteria | yes | no  | no  |
| germany | aeromonas salmonicida              | Bacteria | no  | no  | no  |
| germany | hammondia hammondi                 | Protozoa | no  | no  | no  |
| germany | aspergillus fumigatus              | Fungi    | no  | no  | no  |
| germany | staphylococcus chromogenes         | Bacteria | no  | no  | no  |
| germany | lactobacillus parabuchneri         | Bacteria | no  | no  | no  |
| germany | clostridium chauvoei               | Bacteria | yes | yes | no  |
| germany | infectious bursal disease virus    | Virus    | no  | no  | no  |
| germany | pasteurella aerogenes              | Bacteria | yes | yes | no  |
| germany | geomyces destructans               | Fungi    | no  | no  | no  |
| germany | hamster polyomavirus               | Virus    | no  | no  | no  |
| germany | bacteroides uniformis              | Bacteria | yes | no  | no  |
| germany | staphylococcus capitis             | Bacteria | no  | no  | no  |

|         |                                        |          |     |     |     |
|---------|----------------------------------------|----------|-----|-----|-----|
| germany | canine distemper virus                 | Virus    | no  | no  | no  |
| germany | malassezia furfur                      | Fungi    | yes | yes | no  |
| germany | coprinellus domesticus                 | Fungi    | no  | no  | no  |
| germany | gordonia terrae                        | Bacteria | yes | no  | no  |
| germany | rubella virus                          | Virus    | yes | no  | no  |
| germany | pseudomonas poae                       | Bacteria | no  | no  | no  |
| germany | debaryomyces hansenii                  | Fungi    | no  | no  | no  |
| germany | parainfluenza virus 5                  | Virus    | no  | no  | no  |
| germany | streptococcus pyogenes                 | Bacteria | yes | yes | yes |
| germany | fusarium oxysporum                     | Fungi    | yes | no  | yes |
| germany | borna disease virus                    | Virus    | yes | yes | no  |
| germany | enterococcus faecalis                  | Bacteria | yes | yes | yes |
| germany | giardia intestinalis                   | Protozoa | no  | no  | no  |
| germany | angiostrongylus vasorum                | Helminth | no  | no  | no  |
| germany | streptococcus merionis                 | Bacteria | no  | no  | no  |
| germany | janthinobacterium lividum              | Bacteria | no  | no  | no  |
| germany | mannheimia varigena                    | Bacteria | no  | no  | no  |
| germany | porcine reproductive and respiratory s | Virus    | no  | no  | no  |
| germany | bovine enterovirus                     | Virus    | no  | no  | no  |
| germany | toxoplasma gondii                      | Protozoa | yes | yes | yes |
| germany | delftia acidovorans                    | Bacteria | yes | no  | no  |
| germany | lactobacillus plantarum                | Bacteria | no  | no  | no  |
| germany | lecythophora hoffmannii                | Fungi    | yes | no  | no  |
| germany | burkholderia anthina                   | Bacteria | no  | no  | no  |
| germany | hepatitis a virus                      | Virus    | yes | yes | yes |
| germany | spring viraemia of carp virus          | Virus    | no  | no  | no  |
| germany | hepatitis b virus                      | Virus    | yes | no  | yes |
| germany | orf virus                              | Virus    | yes | yes | no  |
| germany | brucella canis                         | Bacteria | yes | yes | no  |
| germany | aspergillus tubingensis                | Fungi    | no  | no  | no  |
| germany | streptococcus equi                     | Bacteria | yes | yes | no  |
| germany | pneumocystis carinii                   | Fungi    | yes | yes | yes |
| germany | fowl adenovirus d                      | Virus    | no  | no  | no  |
| germany | serratia proteamaculans                | Bacteria | yes | no  | no  |
| germany | chicken anemia virus                   | Virus    | no  | no  | no  |
| germany | puumala virus                          | Virus    | yes | yes | yes |
| germany | proteus vulgaris                       | Bacteria | yes | yes | no  |
| germany | cladosporium cladosporioides           | Fungi    | yes | no  | no  |
| germany | eurotium amstelodami                   | Fungi    | no  | no  | no  |
| germany | babesia capreoli                       | Protozoa | no  | no  | no  |
| germany | feline immunodeficiency virus          | Virus    | no  | no  | no  |
| germany | rhodococcus erythropolis               | Bacteria | yes | no  | no  |
| germany | arthroderma benhamiae                  | Fungi    | no  | no  | no  |
| germany | fowl adenovirus a                      | Virus    | no  | no  | no  |
| germany | hortaea werneckii                      | Fungi    | yes | no  | no  |
| germany | neisseria meningitidis                 | Bacteria | yes | no  | yes |
| germany | bacillus licheniformis                 | Bacteria | yes | yes | no  |
| germany | borrelia lusitaniae                    | Bacteria | no  | no  | no  |
| germany | elephantid herpesvirus 1               | Virus    | no  | no  | no  |
| germany | equid herpesvirus 2                    | Virus    | no  | no  | no  |

|         |                                   |          |     |     |     |
|---------|-----------------------------------|----------|-----|-----|-----|
| germany | <i>listeria innocua</i>           | Bacteria | no  | no  | no  |
| germany | <i>mycoplasma bovis</i>           | Bacteria | no  | no  | no  |
| germany | <i>bacteroides sartorii</i>       | Bacteria | no  | no  | no  |
| germany | <i>clostridium septicum</i>       | Bacteria | yes | yes | no  |
| germany | <i>acinetobacter johnsonii</i>    | Bacteria | yes | no  | no  |
| ghana   | rabies virus                      | Virus    | yes | yes | yes |
| ghana   | <i>Lactobacillus helveticus</i>   | Bacteria | no  | no  | no  |
| ghana   | peste-des-petits-ruminants virus  | Virus    | no  | no  | no  |
| ghana   | <i>Mycobacterium ulcerans</i>     | Bacteria | yes | yes | yes |
| ghana   | norwalk virus                     | Virus    | yes | no  | yes |
| ghana   | influenza a virus                 | Virus    | yes | yes | yes |
| ghana   | <i>Dracunculus medinensis</i>     | Helminth | yes | yes | no  |
| ghana   | human enterovirus c               | Virus    | yes | no  | no  |
| ghana   | <i>Lactobacillus reuteri</i>      | Bacteria | no  | no  | no  |
| ghana   | <i>Mycobacterium arupense</i>     | Bacteria | no  | no  | no  |
| ghana   | <i>Neisseria meningitidis</i>     | Bacteria | yes | no  | yes |
| ghana   | <i>Pediococcus acidilactici</i>   | Bacteria | no  | no  | no  |
| ghana   | <i>Ternidens deminutus</i>        | Helminth | yes | yes | no  |
| ghana   | human immunodeficiency virus 1    | Virus    | yes | no  | yes |
| ghana   | <i>Lactobacillus plantarum</i>    | Bacteria | no  | no  | no  |
| ghana   | influenza b virus                 | Virus    | yes | yes | no  |
| ghana   | <i>Entamoeba histolytica</i>      | Protozoa | yes | yes | no  |
| ghana   | hepatitis delta virus             | Virus    | yes | no  | no  |
| ghana   | <i>Lactobacillus fermentum</i>    | Bacteria | no  | no  | no  |
| ghana   | <i>Schizophyllum commune</i>      | Fungi    | yes | no  | no  |
| ghana   | <i>Weissella confusa</i>          | Bacteria | no  | no  | no  |
| ghana   | <i>Lactobacillus salivarius</i>   | Bacteria | no  | no  | no  |
| ghana   | <i>Wuchereria bancrofti</i>       | Helminth | yes | no  | yes |
| ghana   | hepatitis c virus                 | Virus    | yes | no  | yes |
| ghana   | <i>Plasmodium falciparum</i>      | Protozoa | yes | no  | yes |
| ghana   | <i>Leuconostoc mesenteroides</i>  | Bacteria | no  | no  | no  |
| ghana   | <i>Lichtheimia ramosa</i>         | Fungi    | no  | no  | no  |
| ghana   | <i>Plasmodium ovale</i>           | Protozoa | yes | no  | no  |
| ghana   | <i>Schistosoma mansoni</i>        | Helminth | yes | yes | yes |
| ghana   | african swine fever virus         | Virus    | no  | no  | no  |
| ghana   | <i>Pediococcus pentosaceus</i>    | Bacteria | no  | no  | no  |
| ghana   | human immunodeficiency virus 2    | Virus    | yes | no  | yes |
| ghana   | <i>Escherichia coli</i>           | Bacteria | yes | yes | yes |
| ghana   | <i>Pichia kudriavzevii</i>        | Fungi    | no  | no  | no  |
| ghana   | <i>Schistosoma haematobium</i>    | Helminth | yes | yes | no  |
| ghana   | <i>Mycobacterium scrofulaceum</i> | Bacteria | yes | yes | no  |
| ghana   | human parvovirus b19              | Virus    | no  | no  | no  |
| ghana   | <i>Oesophagostomum bifurcum</i>   | Helminth | yes | yes | no  |
| ghana   | <i>Candida tropicalis</i>         | Fungi    | yes | yes | no  |
| ghana   | <i>Saccharomyces cerevisiae</i>   | Fungi    | yes | no  | no  |
| ghana   | measles virus                     | Virus    | yes | yes | yes |
| ghana   | <i>Aspergillus fumigatus</i>      | Fungi    | no  | no  | no  |
| ghana   | rotavirus a                       | Virus    | yes | yes | yes |
| ghana   | hepatitis b virus                 | Virus    | yes | no  | yes |
| ghana   | <i>Botryosphaeria rhodina</i>     | Fungi    | no  | no  | no  |

|        |                              |          |     |     |     |
|--------|------------------------------|----------|-----|-----|-----|
| ghana  | candida rugosa               | Fungi    | yes | no  | no  |
| ghana  | bk polyomavirus              | Virus    | no  | no  | no  |
| ghana  | candida parapsilosis         | Fungi    | yes | yes | no  |
| ghana  | plasmodium giganteum         | Protozoa | no  | no  | no  |
| ghana  | jc polyomavirus              | Virus    | no  | no  | no  |
| ghana  | enterococcus italicus        | Bacteria | no  | no  | no  |
| ghana  | foot-and-mouth disease virus | Virus    | no  | no  | no  |
| ghana  | enterococcus faecium         | Bacteria | yes | yes | yes |
| ghana  | mycobacterium fortuitum      | Bacteria | no  | no  | no  |
| greece | raoultella ornithinolytica   | Bacteria | no  | no  | no  |
| greece | stenotrophomonas maltophilia | Bacteria | no  | no  | no  |
| greece | visna/maedi virus            | Virus    | no  | no  | no  |
| greece | bacillus pumilus             | Bacteria | yes | no  | no  |
| greece | acinetobacter baumannii      | Bacteria | yes | no  | no  |
| greece | plasmodium vivax             | Protozoa | yes | no  | yes |
| greece | aeromonas salmonicida        | Bacteria | no  | no  | no  |
| greece | betacoronavirus 1            | Virus    | no  | no  | no  |
| greece | sphingomonas paucimobilis    | Bacteria | yes | no  | no  |
| greece | lactobacillus plantarum      | Bacteria | no  | no  | no  |
| greece | xanthomonas campestris       | Bacteria | no  | no  | no  |
| greece | klebsiella pneumoniae        | Bacteria | yes | yes | yes |
| greece | escherichia coli             | Bacteria | yes | yes | yes |
| greece | human coronavirus 229e       | Virus    | yes | no  | no  |
| greece | human papillomavirus 16      | Virus    | no  | no  | no  |
| greece | botryosphaeria dothidea      | Fungi    | no  | no  | no  |
| greece | human enterovirus a          | Virus    | yes | no  | no  |
| greece | acinetobacter johnsonii      | Bacteria | yes | no  | no  |
| greece | dobrava-belgrade virus       | Virus    | yes | yes | no  |
| greece | vibrio splendidus            | Bacteria | no  | no  | no  |
| greece | influenza b virus            | Virus    | yes | yes | no  |
| greece | photobacterium damsela       | Bacteria | yes | yes | no  |
| greece | saccharomyces cerevisiae     | Fungi    | yes | no  | no  |
| greece | campylobacter jejuni         | Bacteria | yes | yes | yes |
| greece | listeria monocytogenes       | Bacteria | yes | yes | yes |
| greece | chryseobacterium indologenes | Bacteria | no  | no  | no  |
| greece | legionella pneumophila       | Bacteria | yes | no  | yes |
| greece | pseudomonas stutzeri         | Bacteria | yes | no  | no  |
| greece | helicobacter pylori          | Bacteria | yes | yes | no  |
| greece | human parvovirus b19         | Virus    | no  | no  | no  |
| greece | human enterovirus b          | Virus    | yes | no  | yes |
| greece | fasciola hepatica            | Helminth | yes | yes | no  |
| greece | pseudomonas aeruginosa       | Bacteria | yes | yes | yes |
| greece | foot-and-mouth disease virus | Virus    | no  | no  | no  |
| greece | norwalk virus                | Virus    | yes | no  | yes |
| greece | aeromonas hydrophila         | Bacteria | yes | yes | yes |
| greece | bluetongue virus             | Virus    | no  | no  | no  |
| greece | streptococcus pneumoniae     | Bacteria | yes | yes | yes |
| greece | rubella virus                | Virus    | yes | no  | no  |
| greece | onchocerca lupi              | Helminth | no  | no  | no  |
| greece | human enterovirus c          | Virus    | yes | no  | no  |



|           |                                       |          |     |     |     |
|-----------|---------------------------------------|----------|-----|-----|-----|
| greece    | fusarium oxysporum                    | Fungi    | yes | no  | yes |
| greece    | neisseria meningitidis                | Bacteria | yes | no  | yes |
| greece    | crimean-congo hemorrhagic fever virus | Virus    | no  | no  | no  |
| greece    | human coronavirus n163                | Virus    | no  | no  | no  |
| greece    | hepatitis b virus                     | Virus    | yes | no  | yes |
| greece    | avian coronavirus                     | Virus    | no  | no  | no  |
| greece    | clavospora lusitaniae                 | Fungi    | no  | no  | no  |
| greece    | encephalomyocarditis virus            | Virus    | yes | yes | no  |
| greece    | lactobacillus paracasei               | Bacteria | no  | no  | no  |
| greece    | penicillium marneffei                 | Fungi    | yes | yes | yes |
| greece    | brucella melitensis                   | Bacteria | yes | yes | yes |
| greece    | chlamydomyces psittaci                | Bacteria | yes | yes | no  |
| greece    | influenza a virus                     | Virus    | yes | yes | yes |
| greece    | human immunodeficiency virus 1        | Virus    | yes | no  | yes |
| greece    | staphylococcus lugdunensis            | Bacteria | yes | no  | no  |
| greece    | legionella anisa                      | Bacteria | yes | no  | no  |
| greece    | rickettsia typhi                      | Bacteria | yes | yes | no  |
| greece    | chlamydomyces abortus                 | Bacteria | no  | no  | no  |
| greece    | measles virus                         | Virus    | yes | yes | yes |
| greece    | enterococcus faecium                  | Bacteria | yes | yes | yes |
| greece    | european brown hare syndrome virus    | Virus    | no  | no  | no  |
| greece    | orf virus                             | Virus    | yes | yes | no  |
| greece    | human papillomavirus 18               | Virus    | no  | no  | no  |
| greece    | human immunodeficiency virus 2        | Virus    | yes | no  | yes |
| greece    | jc polyomavirus                       | Virus    | no  | no  | no  |
| greece    | pseudomonas putida                    | Bacteria | yes | no  | no  |
| greece    | myxoma virus                          | Virus    | no  | no  | no  |
| greece    | coxiella burnetii                     | Bacteria | yes | yes | no  |
| greece    | contraecum micropapillatum            | Helminth | no  | no  | no  |
| greece    | chlamydia trachomatis                 | Bacteria | yes | yes | yes |
| greece    | piscirickettsia salmonis              | Bacteria | no  | no  | no  |
| greece    | human herpesvirus 8                   | Virus    | yes | no  | yes |
| greece    | bk polyomavirus                       | Virus    | no  | no  | no  |
| greece    | leishmania infantum                   | Protozoa | yes | yes | yes |
| greece    | leuconostoc mesenteroides             | Bacteria | no  | no  | no  |
| greece    | hepatitis c virus                     | Virus    | yes | no  | yes |
| greece    | heligmosomoides polygyrus             | Helminth | no  | no  | no  |
| greece    | hepatitis a virus                     | Virus    | yes | yes | yes |
| greece    | caprine arthritis encephalitis virus  | Virus    | no  | no  | no  |
| greece    | staphylococcus aureus                 | Bacteria | yes | yes | yes |
| greece    | west nile virus                       | Virus    | yes | yes | yes |
| greece    | salmonella enterica                   | Bacteria | no  | no  | no  |
| greece    | equine infectious anemia virus        | Virus    | no  | no  | no  |
| greenland | alternaria alternata                  | Fungi    | yes | yes | no  |
| greenland | anisakis simplex                      | Helminth | yes | yes | yes |
| greenland | anisakis paggiae                      | Helminth | no  | no  | no  |
| greenland | clostridium botulinum                 | Bacteria | yes | yes | yes |
| greenland | rabies virus                          | Virus    | yes | yes | yes |
| greenland | cladosporium cladosporioides          | Fungi    | yes | no  | no  |
| grenada   | dengue virus                          | Virus    | no  | no  | no  |

|            |                                      |          |     |     |     |
|------------|--------------------------------------|----------|-----|-----|-----|
| grenada    | pseudomonas putida                   | Bacteria | yes | no  | no  |
| grenada    | human immunodeficiency virus 1       | Virus    | yes | no  | yes |
| guadeloupe | dengue virus                         | Virus    | no  | no  | no  |
| guadeloupe | human enterovirus c                  | Virus    | yes | no  | no  |
| guadeloupe | human immunodeficiency virus 1       | Virus    | yes | no  | yes |
| guadeloupe | trichostrongylus colubriformis       | Helminth | yes | yes | no  |
| guadeloupe | primate t-lymphotropic virus 1       | Virus    | no  | no  | no  |
| guadeloupe | schistosoma mansoni                  | Helminth | yes | yes | yes |
| guadeloupe | epizootic hemorrhagic disease virus  | Virus    | no  | no  | no  |
| guam       | dengue virus                         | Virus    | no  | no  | no  |
| guam       | vibrio cholerae                      | Bacteria | yes | no  | yes |
| guam       | human immunodeficiency virus 1       | Virus    | yes | no  | yes |
| guam       | human immunodeficiency virus 2       | Virus    | yes | no  | yes |
| guam       | escherichia coli                     | Bacteria | yes | yes | yes |
| guam       | jc polyomavirus                      | Virus    | no  | no  | no  |
| guam       | influenza a virus                    | Virus    | yes | yes | yes |
| guam       | salinispora arenicola                | Bacteria | no  | no  | no  |
| guatemala  | vibrio cholerae                      | Bacteria | yes | no  | yes |
| guatemala  | ajellomyces capsulatus               | Fungi    | no  | no  | no  |
| guatemala  | cryptosporidium parvum               | Protozoa | yes | yes | yes |
| guatemala  | plasmodium falciparum                | Protozoa | yes | no  | yes |
| guatemala  | trypanosoma cruzi                    | Protozoa | yes | yes | yes |
| guatemala  | human enterovirus c                  | Virus    | yes | no  | no  |
| guatemala  | candida parapsilosis                 | Fungi    | yes | yes | no  |
| guatemala  | sporothrix schenckii                 | Fungi    | yes | yes | no  |
| guatemala  | trichuris trichiura                  | Helminth | yes | yes | no  |
| guatemala  | leishmania braziliensis              | Protozoa | yes | yes | no  |
| guatemala  | venezuelan equine encephalitis virus | Virus    | yes | yes | yes |
| guatemala  | onchocerca volvulus                  | Helminth | yes | yes | yes |
| guatemala  | cyclospora cayetanensis              | Protozoa | yes | yes | yes |
| guatemala  | human immunodeficiency virus 1       | Virus    | yes | no  | yes |
| guatemala  | paragonimus mexicanus                | Helminth | yes | yes | no  |
| guatemala  | bluetongue virus                     | Virus    | no  | no  | no  |
| guatemala  | ascaris lumbricoides                 | Helminth | yes | yes | no  |
| guatemala  | crassicutis cichlasomae              | Helminth | no  | no  | no  |
| guatemala  | langeronia macrocirra                | Helminth | no  | no  | no  |
| guatemala  | classical swine fever virus          | Virus    | no  | no  | no  |
| guatemala  | taenia solium                        | Helminth | yes | no  | yes |
| guatemala  | shigella dysenteriae                 | Bacteria | yes | yes | yes |
| guatemala  | plasmodium vivax                     | Protozoa | yes | no  | yes |
| guatemala  | escherichia coli                     | Bacteria | yes | yes | yes |
| guatemala  | helicobacter pylori                  | Bacteria | yes | yes | no  |
| guatemala  | leishmania mexicana                  | Protozoa | yes | yes | no  |
| guatemala  | human immunodeficiency virus 2       | Virus    | yes | no  | yes |
| guatemala  | dengue virus                         | Virus    | no  | no  | no  |
| guatemala  | eastern equine encephalitis virus    | Virus    | yes | yes | yes |
| guatemala  | necator americanus                   | Helminth | yes | yes | no  |
| guinea     | human immunodeficiency virus 1       | Virus    | yes | no  | yes |
| guinea     | lassa virus                          | Virus    | yes | yes | yes |
| guinea     | foot-and-mouth disease virus         | Virus    | no  | no  | no  |

|               |                                   |          |     |     |     |
|---------------|-----------------------------------|----------|-----|-----|-----|
| guinea        | peste-des-petits-ruminants virus  | Virus    | no  | no  | no  |
| guinea        | plasmodium vivax                  | Protozoa | yes | no  | yes |
| guinea        | yellow fever virus                | Virus    | yes | yes | yes |
| guinea        | plasmodium falciparum             | Protozoa | yes | no  | yes |
| guinea        | rift valley fever virus           | Virus    | yes | yes | yes |
| guinea        | ajellomyces capsulatus            | Fungi    | no  | no  | no  |
| guinea        | human immunodeficiency virus 2    | Virus    | yes | no  | yes |
| guinea        | hepatitis delta virus             | Virus    | yes | no  | no  |
| guinea-bissau | human immunodeficiency virus 2    | Virus    | yes | no  | yes |
| guinea-bissau | giardia intestinalis              | Protozoa | no  | no  | no  |
| guinea-bissau | mycobacterium bovis               | Bacteria | yes | yes | yes |
| guinea-bissau | measles virus                     | Virus    | yes | yes | yes |
| guinea-bissau | human immunodeficiency virus 1    | Virus    | yes | no  | yes |
| guinea-bissau | yellow fever virus                | Virus    | yes | yes | yes |
| guinea-bissau | vibrio cholerae                   | Bacteria | yes | no  | yes |
| guinea-bissau | primate t-lymphotropic virus 1    | Virus    | no  | no  | no  |
| guinea-bissau | rotavirus a                       | Virus    | yes | yes | yes |
| guinea-bissau | escherichia coli                  | Bacteria | yes | yes | yes |
| guinea-bissau | plasmodium falciparum             | Protozoa | yes | no  | yes |
| guinea-bissau | mycobacterium tuberculosis        | Bacteria | yes | yes | yes |
| guyana        | primate t-lymphotropic virus 1    | Virus    | no  | no  | no  |
| guyana        | dengue virus                      | Virus    | no  | no  | no  |
| guyana        | plasmodium falciparum             | Protozoa | yes | no  | yes |
| guyana        | schizophyllum commune             | Fungi    | yes | no  | no  |
| guyana        | eastern equine encephalitis virus | Virus    | yes | yes | yes |
| guyana        | human immunodeficiency virus 1    | Virus    | yes | no  | yes |
| haiti         | african swine fever virus         | Virus    | no  | no  | no  |
| haiti         | pneumocystis carinii              | Fungi    | yes | yes | yes |
| haiti         | taenia solium                     | Helminth | yes | no  | yes |
| haiti         | human immunodeficiency virus 1    | Virus    | yes | no  | yes |
| haiti         | hepatitis b virus                 | Virus    | yes | no  | yes |
| haiti         | cyclospora cayetanensis           | Protozoa | yes | yes | yes |
| haiti         | toxoplasma gondii                 | Protozoa | yes | yes | yes |
| haiti         | acinetobacter baumannii           | Bacteria | yes | no  | no  |
| haiti         | shigella sonnei                   | Bacteria | yes | yes | no  |
| haiti         | vibrio cholerae                   | Bacteria | yes | no  | yes |
| haiti         | primate t-lymphotropic virus 1    | Virus    | no  | no  | no  |
| haiti         | mycobacterium tuberculosis        | Bacteria | yes | yes | yes |
| haiti         | bacillus anthracis                | Bacteria | yes | yes | yes |
| haiti         | human immunodeficiency virus 2    | Virus    | yes | no  | yes |
| haiti         | plasmodium falciparum             | Protozoa | yes | no  | yes |
| haiti         | porcine teschovirus               | Virus    | no  | no  | no  |
| haiti         | dengue virus                      | Virus    | no  | no  | no  |
| haiti         | wuchereria bancrofti              | Helminth | yes | no  | yes |
| haiti         | human herpesvirus 8               | Virus    | yes | no  | yes |
| haiti         | escherichia coli                  | Bacteria | yes | yes | yes |
| haiti         | mansonella ozzardi                | Helminth | yes | no  | no  |
| honduras      | classical swine fever virus       | Virus    | no  | no  | no  |
| honduras      | plasmodium falciparum             | Protozoa | yes | no  | yes |
| honduras      | trypanosoma rangeli               | Protozoa | no  | no  | no  |

|           |                                         |          |     |     |     |
|-----------|-----------------------------------------|----------|-----|-----|-----|
| honduras  | fusarium oxysporum                      | Fungi    | yes | no  | yes |
| honduras  | dengue virus                            | Virus    | no  | no  | no  |
| honduras  | bluetongue virus                        | Virus    | no  | no  | no  |
| honduras  | influenza a virus                       | Virus    | yes | yes | yes |
| honduras  | human enterovirus b                     | Virus    | yes | no  | yes |
| honduras  | vesicular stomatitis new jersey virus   | Virus    | no  | no  | no  |
| honduras  | human papillomavirus 16                 | Virus    | no  | no  | no  |
| honduras  | plasmodium vivax                        | Protozoa | yes | no  | yes |
| honduras  | human immunodeficiency virus 1          | Virus    | yes | no  | yes |
| hong kong | acinetobacter baumannii                 | Bacteria | yes | no  | no  |
| hong kong | enterococcus faecalis                   | Bacteria | yes | yes | yes |
| hong kong | mycobacterium avium                     | Bacteria | yes | yes | yes |
| hong kong | yersinia pestis                         | Bacteria | yes | yes | yes |
| hong kong | vibrio shilonii                         | Bacteria | no  | no  | no  |
| hong kong | human immunodeficiency virus 1          | Virus    | yes | no  | yes |
| hong kong | streptococcus agalactiae                | Bacteria | yes | yes | no  |
| hong kong | human coronavirus hku1                  | Virus    | no  | no  | no  |
| hong kong | malassezia furfur                       | Fungi    | yes | yes | no  |
| hong kong | trichodinella epizootica                | Protozoa | no  | no  | no  |
| hong kong | human parainfluenza virus 4             | Virus    | yes | no  | no  |
| hong kong | staphylococcus lugdunensis              | Bacteria | yes | no  | no  |
| hong kong | pseudomonas alcaligenes                 | Bacteria | yes | no  | no  |
| hong kong | human immunodeficiency virus 2          | Virus    | yes | no  | yes |
| hong kong | clonorchis sinensis                     | Helminth | yes | no  | no  |
| hong kong | hepatitis c virus                       | Virus    | yes | no  | yes |
| hong kong | sapporo virus                           | Virus    | no  | no  | no  |
| hong kong | klebsiella pneumoniae                   | Bacteria | yes | yes | yes |
| hong kong | naegleria fowleri                       | Protozoa | yes | no  | no  |
| hong kong | candida albicans                        | Fungi    | yes | yes | yes |
| hong kong | proteus mirabilis                       | Bacteria | yes | yes | no  |
| hong kong | enterobacter aerogenes                  | Bacteria | yes | yes | no  |
| hong kong | saccharomyces cerevisiae                | Fungi    | yes | no  | no  |
| hong kong | neisseria meningitidis                  | Bacteria | yes | no  | yes |
| hong kong | severe acute respiratory syndrome-rel   | Virus    | no  | no  | no  |
| hong kong | human herpesvirus 7                     | Virus    | yes | no  | no  |
| hong kong | mycoplasma pneumoniae                   | Bacteria | yes | no  | no  |
| hong kong | human papillomavirus 53                 | Virus    | no  | no  | no  |
| hong kong | measles virus                           | Virus    | yes | yes | yes |
| hong kong | human papillomavirus 18                 | Virus    | no  | no  | no  |
| hong kong | streptococcus pyogenes                  | Bacteria | yes | yes | yes |
| hong kong | influenza a virus                       | Virus    | yes | yes | yes |
| hong kong | human coronavirus nl63                  | Virus    | no  | no  | no  |
| hong kong | infectious spleen and kidney necrosis v | Virus    | no  | no  | no  |
| hong kong | human enterovirus b                     | Virus    | yes | no  | yes |
| hong kong | streptococcus pneumoniae                | Bacteria | yes | yes | yes |
| hong kong | human enterovirus c                     | Virus    | yes | no  | no  |
| hong kong | pseudoalteromonas spongiae              | Bacteria | no  | no  | no  |
| hong kong | alteromonas macleodii                   | Bacteria | no  | no  | no  |
| hong kong | norwalk virus                           | Virus    | yes | no  | yes |
| hong kong | vibrio harveyi                          | Bacteria | no  | no  | no  |

|           |                                        |          |     |     |     |
|-----------|----------------------------------------|----------|-----|-----|-----|
| hong kong | influenza b virus                      | Virus    | yes | yes | no  |
| hong kong | rubella virus                          | Virus    | yes | no  | no  |
| hong kong | escherichia coli                       | Bacteria | yes | yes | yes |
| hong kong | human papillomavirus 16                | Virus    | no  | no  | no  |
| hong kong | vibrio vulnificus                      | Bacteria | yes | yes | yes |
| hong kong | mycobacterium tuberculosis             | Bacteria | yes | yes | yes |
| hong kong | human herpesvirus 4                    | Virus    | no  | no  | no  |
| hong kong | shigella sonnei                        | Bacteria | yes | yes | no  |
| hong kong | foot-and-mouth disease virus           | Virus    | no  | no  | no  |
| hong kong | hepatitis b virus                      | Virus    | yes | no  | yes |
| hong kong | bacillus cereus                        | Bacteria | yes | yes | no  |
| hong kong | neisseria gonorrhoeae                  | Bacteria | yes | no  | yes |
| hong kong | streptococcus suis                     | Bacteria | yes | yes | no  |
| hong kong | betacoronavirus 1                      | Virus    | no  | no  | no  |
| hong kong | helicobacter pylori                    | Bacteria | yes | yes | no  |
| hong kong | malassezia globosa                     | Fungi    | yes | yes | no  |
| hong kong | pneumocystis carinii                   | Fungi    | yes | yes | yes |
| hong kong | human papillomavirus 6                 | Virus    | no  | no  | no  |
| hong kong | pseudomonas aeruginosa                 | Bacteria | yes | yes | yes |
| hong kong | human rhinovirus c                     | Virus    | no  | no  | no  |
| hong kong | hepatitis a virus                      | Virus    | yes | yes | yes |
| hong kong | staphylococcus aureus                  | Bacteria | yes | yes | yes |
| hong kong | newcastle disease virus                | Virus    | yes | yes | no  |
| hong kong | bacillus megaterium                    | Bacteria | no  | no  | no  |
| hong kong | kluvera intermedia                     | Bacteria | no  | no  | no  |
| hong kong | burkholderia pseudomallei              | Bacteria | yes | yes | no  |
| hong kong | haemophilus influenzae                 | Bacteria | yes | no  | yes |
| hong kong | classical swine fever virus            | Virus    | no  | no  | no  |
| hong kong | penicillium marneffeii                 | Fungi    | yes | yes | yes |
| hong kong | rotavirus a                            | Virus    | yes | yes | yes |
| hong kong | laribacter hongkongensis               | Bacteria | no  | no  | no  |
| hong kong | human metapneumovirus                  | Virus    | no  | no  | no  |
| hong kong | human papillomavirus 26                | Virus    | no  | no  | no  |
| hong kong | vibrio parahaemolyticus                | Bacteria | yes | yes | yes |
| hong kong | avian coronavirus                      | Virus    | no  | no  | no  |
| hong kong | salmonella enterica                    | Bacteria | no  | no  | no  |
| hong kong | vibrio cholerae                        | Bacteria | yes | no  | yes |
| hong kong | hepatitis e virus                      | Virus    | yes | yes | yes |
| hong kong | porcine reproductive and respiratory s | Virus    | no  | no  | no  |
| hong kong | staphylococcus pseudintermedius        | Bacteria | no  | no  | no  |
| hong kong | shigella flexneri                      | Bacteria | yes | yes | no  |
| hong kong | enterobacter hormaechei                | Bacteria | yes | yes | no  |
| hong kong | human respiratory syncytial virus      | Virus    | yes | no  | no  |
| hong kong | peste-des-petits-ruminants virus       | Virus    | no  | no  | no  |
| hong kong | chlamydia trachomatis                  | Bacteria | yes | yes | yes |
| hungary   | aeromonas allosaccharophila            | Bacteria | no  | no  | no  |
| hungary   | human immunodeficiency virus 1         | Virus    | yes | no  | yes |
| hungary   | staphylococcus lentus                  | Bacteria | no  | no  | no  |
| hungary   | rabies virus                           | Virus    | yes | yes | yes |
| hungary   | avian metapneumovirus                  | Virus    | no  | no  | no  |

|         |                                  |          |     |     |     |
|---------|----------------------------------|----------|-----|-----|-----|
| hungary | fowl adenovirus b                | Virus    | no  | no  | no  |
| hungary | pseudomonas putida               | Bacteria | yes | no  | no  |
| hungary | goose parvovirus                 | Virus    | no  | no  | no  |
| hungary | pseudomonas fluorescens          | Bacteria | yes | no  | no  |
| hungary | pepper mild mottle virus         | Virus    | no  | no  | no  |
| hungary | norwalk virus                    | Virus    | yes | no  | yes |
| hungary | pseudomonas stutzeri             | Bacteria | yes | no  | no  |
| hungary | bacillus mojavenis               | Bacteria | no  | no  | no  |
| hungary | cryptosporidium baileyi          | Protozoa | no  | no  | no  |
| hungary | microbacterium testaceum         | Bacteria | no  | no  | no  |
| hungary | bacillus subtilis                | Bacteria | yes | yes | no  |
| hungary | aeromonas veronii                | Bacteria | yes | no  | yes |
| hungary | andrya rhopalocephala            | Helminth | no  | no  | no  |
| hungary | debaryomyces hansenii            | Fungi    | no  | no  | no  |
| hungary | hepatitis a virus                | Virus    | yes | yes | yes |
| hungary | canine distemper virus           | Virus    | no  | no  | no  |
| hungary | bacillus mycoides                | Bacteria | yes | no  | no  |
| hungary | aeromonas sobria                 | Bacteria | yes | yes | no  |
| hungary | human enterovirus b              | Virus    | yes | no  | yes |
| hungary | atractolytocestus huronensis     | Helminth | no  | no  | no  |
| hungary | brevibacillus agri               | Bacteria | no  | no  | no  |
| hungary | babesia canis                    | Protozoa | no  | no  | no  |
| hungary | duck circovirus                  | Virus    | no  | no  | no  |
| hungary | eimeria leucisci                 | Protozoa | no  | no  | no  |
| hungary | micrococcus luteus               | Bacteria | no  | no  | no  |
| hungary | conidiobolus coronatus           | Fungi    | yes | yes | no  |
| hungary | gallid herpesvirus 2             | Virus    | no  | no  | no  |
| hungary | providencia stuartii             | Bacteria | yes | yes | no  |
| hungary | fascioloides magna               | Helminth | no  | no  | no  |
| hungary | alphacoronavirus 1               | Virus    | no  | no  | no  |
| hungary | stenotrophomonas maltophilia     | Bacteria | no  | no  | no  |
| hungary | dengue virus                     | Virus    | no  | no  | no  |
| hungary | hepatitis b virus                | Virus    | yes | no  | yes |
| hungary | spring viraemia of carp virus    | Virus    | no  | no  | no  |
| hungary | fowl adenovirus a                | Virus    | no  | no  | no  |
| hungary | anaplasma marginale              | Bacteria | no  | no  | no  |
| hungary | bacillus cereus                  | Bacteria | yes | yes | no  |
| hungary | rabbit hemorrhagic disease virus | Virus    | no  | no  | no  |
| hungary | rotavirus a                      | Virus    | yes | yes | yes |
| hungary | mycoplasma mycoides              | Bacteria | no  | no  | no  |
| hungary | anaplasma ovis                   | Bacteria | no  | no  | no  |
| hungary | cryptosporidium parvum           | Protozoa | yes | yes | yes |
| hungary | human adenovirus c               | Virus    | yes | no  | no  |
| hungary | porcine torovirus                | Virus    | no  | no  | no  |
| hungary | cryptosporidium meleagridis      | Protozoa | no  | no  | no  |
| hungary | paranoplocephala jarrelli        | Helminth | no  | no  | no  |
| hungary | kocuria polaris                  | Bacteria | no  | no  | no  |
| hungary | chicken astrovirus               | Virus    | no  | no  | no  |
| hungary | human enterovirus a              | Virus    | yes | no  | no  |
| hungary | proteus mirabilis                | Bacteria | yes | yes | no  |

|         |                                        |          |     |     |     |
|---------|----------------------------------------|----------|-----|-----|-----|
| hungary | achromobacter xylooxidans              | Bacteria | yes | no  | no  |
| hungary | human astrovirus                       | Virus    | yes | no  | yes |
| hungary | human herpesvirus 8                    | Virus    | yes | no  | yes |
| hungary | bovine adenovirus d                    | Virus    | no  | no  | no  |
| hungary | west nile virus                        | Virus    | yes | yes | yes |
| hungary | human papillomavirus 6                 | Virus    | no  | no  | no  |
| hungary | bacillus clausii                       | Bacteria | no  | no  | no  |
| hungary | microbacterium oxydans                 | Bacteria | no  | no  | no  |
| hungary | bacillus pumilus                       | Bacteria | yes | no  | no  |
| hungary | histophilus somni                      | Bacteria | no  | no  | no  |
| hungary | hepatitis c virus                      | Virus    | yes | no  | yes |
| hungary | shewanella putrefaciens                | Bacteria | no  | no  | no  |
| hungary | cryptosporidium andersoni              | Protozoa | no  | no  | no  |
| hungary | lysiniabacillus fusiformis             | Bacteria | no  | no  | no  |
| hungary | suid herpesvirus 1                     | Virus    | no  | no  | no  |
| hungary | bacillus amyloliquefaciens             | Bacteria | no  | no  | no  |
| hungary | arthroderma fulvum                     | Fungi    | no  | no  | no  |
| hungary | newcastle disease virus                | Virus    | yes | yes | no  |
| hungary | porcine reproductive and respiratory s | Virus    | no  | no  | no  |
| hungary | bacillus licheniformis                 | Bacteria | yes | yes | no  |
| hungary | aerococcus viridans                    | Bacteria | yes | no  | no  |
| hungary | dobrava-belgrade virus                 | Virus    | yes | yes | no  |
| hungary | fowl adenovirus e                      | Virus    | no  | no  | no  |
| hungary | bovine torovirus                       | Virus    | no  | no  | no  |
| hungary | echinococcus granulosus                | Helminth | yes | yes | yes |
| hungary | rhodococcus rhodochrous                | Bacteria | yes | no  | no  |
| hungary | influenza a virus                      | Virus    | yes | yes | yes |
| hungary | bacillus megaterium                    | Bacteria | no  | no  | no  |
| hungary | clostridium botulinum                  | Bacteria | yes | yes | yes |
| hungary | bovine viral diarrhea virus 1          | Virus    | no  | no  | no  |
| hungary | rhodococcus erythropolis               | Bacteria | yes | no  | no  |
| hungary | clostridium sporogenes                 | Bacteria | yes | yes | no  |
| hungary | sapporo virus                          | Virus    | no  | no  | no  |
| hungary | equid herpesvirus 2                    | Virus    | no  | no  | no  |
| hungary | cordyceps bassiana                     | Fungi    | no  | no  | no  |
| hungary | borrelia afzelii                       | Bacteria | no  | no  | no  |
| hungary | brachyspira hyodysenteriae             | Bacteria | no  | no  | no  |
| hungary | avian orthoreovirus                    | Virus    | no  | no  | no  |
| hungary | goussia desseri                        | Protozoa | no  | no  | no  |
| hungary | human picobirnavirus                   | Virus    | no  | no  | no  |
| hungary | human adenovirus d                     | Virus    | yes | no  | no  |
| hungary | campylobacter lanienae                 | Bacteria | no  | no  | no  |
| hungary | dietzia natronolimnaea                 | Bacteria | no  | no  | no  |
| hungary | staphylococcus warneri                 | Bacteria | yes | yes | no  |
| hungary | ovine adenovirus a                     | Virus    | no  | no  | no  |
| hungary | brachyspira suanatina                  | Bacteria | no  | no  | no  |
| hungary | pseudomonas anguilliseptica            | Bacteria | no  | no  | no  |
| hungary | geomyces destructans                   | Fungi    | no  | no  | no  |
| hungary | burkholderia mallei                    | Bacteria | yes | yes | no  |
| hungary | escherichia coli                       | Bacteria | yes | yes | yes |

|         |                                        |          |     |     |     |
|---------|----------------------------------------|----------|-----|-----|-----|
| hungary | bacillus thuringiensis                 | Bacteria | yes | no  | no  |
| hungary | brachyspira pilosicoli                 | Bacteria | no  | no  | no  |
| hungary | mycobacterium tuberculosis             | Bacteria | yes | yes | yes |
| hungary | delftia acidovorans                    | Bacteria | yes | no  | no  |
| hungary | brucella ovis                          | Bacteria | no  | no  | no  |
| hungary | yersinia intermedia                    | Bacteria | yes | yes | no  |
| hungary | enterococcus faecalis                  | Bacteria | yes | yes | yes |
| hungary | bk polyomavirus                        | Virus    | no  | no  | no  |
| hungary | pomphorhynchus laevis                  | Helminth | no  | no  | no  |
| hungary | equine infectious anemia virus         | Virus    | no  | no  | no  |
| hungary | staphylococcus haemolyticus            | Bacteria | yes | yes | no  |
| hungary | bacillus sonorensis                    | Bacteria | no  | no  | no  |
| hungary | usutu virus                            | Virus    | yes | yes | no  |
| hungary | fowl adenovirus d                      | Virus    | no  | no  | no  |
| hungary | cryptosporidium hominis                | Protozoa | yes | no  | yes |
| hungary | borrelia spielmanii                    | Bacteria | no  | no  | no  |
| hungary | francisella tularensis                 | Bacteria | yes | yes | yes |
| hungary | onchocerca lupi                        | Helminth | no  | no  | no  |
| hungary | hepatitis e virus                      | Virus    | yes | yes | yes |
| hungary | measles virus                          | Virus    | yes | yes | yes |
| hungary | streptococcus pneumoniae               | Bacteria | yes | yes | yes |
| hungary | echinococcus multilocularis            | Helminth | yes | yes | no  |
| iceland | sulfolobus islandicus rod-shaped virus | Virus    | no  | no  | no  |
| iceland | staphylococcus aureus                  | Bacteria | yes | yes | yes |
| iceland | contraeaecum septentrionale            | Helminth | no  | no  | no  |
| iceland | moritella viscosa                      | Bacteria | no  | no  | no  |
| iceland | renibacterium salmoninarum             | Bacteria | no  | no  | no  |
| iceland | chlamydia trachomatis                  | Bacteria | yes | yes | yes |
| iceland | equid herpesvirus 2                    | Virus    | no  | no  | no  |
| iceland | legionella pneumophila                 | Bacteria | yes | no  | yes |
| iceland | dengue virus                           | Virus    | no  | no  | no  |
| iceland | streptococcus mutans                   | Bacteria | yes | no  | no  |
| iceland | pseudoterranova krabbei                | Helminth | no  | no  | no  |
| iceland | human enterovirus a                    | Virus    | yes | no  | no  |
| iceland | entamoeba bovis                        | Protozoa | no  | no  | no  |
| iceland | aureobasidium pullulans                | Fungi    | yes | no  | no  |
| iceland | streptococcus pneumoniae               | Bacteria | yes | yes | yes |
| iceland | sulfolobus islandicus rod-shaped virus | Virus    | no  | no  | no  |
| india   | microbacterium hydrocarbonoxydans      | Bacteria | no  | no  | no  |
| india   | norwalk virus                          | Virus    | yes | no  | yes |
| india   | fusobacterium periodonticum            | Bacteria | yes | no  | no  |
| india   | vibrio vulnificus                      | Bacteria | yes | yes | yes |
| india   | leptospira interrogans                 | Bacteria | yes | yes | yes |
| india   | arthroderma simii                      | Fungi    | no  | no  | no  |
| india   | fusarium solani                        | Fungi    | yes | yes | yes |
| india   | vagococcus fluvialis                   | Bacteria | no  | no  | no  |
| india   | microbacterium oleivorans              | Bacteria | no  | no  | no  |
| india   | lactobacillus acidophilus              | Bacteria | no  | no  | no  |
| india   | streptococcus pyogenes                 | Bacteria | yes | yes | yes |
| india   | brevibacillus agri                     | Bacteria | no  | no  | no  |



|       |                                |          |     |     |     |
|-------|--------------------------------|----------|-----|-----|-----|
| india | apophysomyces elegans          | Fungi    | yes | no  | no  |
| india | brevundimonas vesicularis      | Bacteria | yes | no  | no  |
| india | enterococcus durans            | Bacteria | yes | yes | no  |
| india | rhizopus microsporus           | Fungi    | yes | yes | no  |
| india | cellulosimicrobium cellulans   | Bacteria | no  | no  | no  |
| india | arthroderma vanbreuseghemii    | Fungi    | no  | no  | no  |
| india | trypanosoma evansi             | Protozoa | no  | no  | no  |
| india | burkholderia fungorum          | Bacteria | no  | no  | no  |
| india | rhizomucor miehei              | Fungi    | yes | yes | no  |
| india | human enterovirus b            | Virus    | yes | no  | yes |
| india | enterobacter ludwigii          | Bacteria | no  | no  | no  |
| india | mycoplasma synoviae            | Bacteria | no  | no  | no  |
| india | campylobacter jejuni           | Bacteria | yes | yes | yes |
| india | aspergillus versicolor         | Fungi    | yes | no  | no  |
| india | gibberella moniliformis        | Fungi    | no  | no  | no  |
| india | pasteurella multocida          | Bacteria | yes | yes | no  |
| india | klebsiella oxytoca             | Bacteria | yes | yes | no  |
| india | lactobacillus fermentum        | Bacteria | no  | no  | no  |
| india | bacillus endophyticus          | Bacteria | no  | no  | no  |
| india | cordyceps bassiana             | Fungi    | no  | no  | no  |
| india | bacillus altitudinis           | Bacteria | no  | no  | no  |
| india | pestalotiopsis microspora      | Fungi    | no  | no  | no  |
| india | human papillomavirus 18        | Virus    | no  | no  | no  |
| india | pseudomonas stutzeri           | Bacteria | yes | no  | no  |
| india | cryptosporidium hominis        | Protozoa | yes | no  | yes |
| india | staphylococcus xylosus         | Bacteria | no  | no  | no  |
| india | corynebacterium diphtheriae    | Bacteria | yes | no  | yes |
| india | malayanodiscoides indicus      | Helminth | no  | no  | no  |
| india | pseudomonas mosselii           | Bacteria | no  | no  | no  |
| india | neurospora crassa              | Fungi    | no  | no  | no  |
| india | kluyvera ascorbata             | Bacteria | yes | yes | no  |
| india | proteus mirabilis              | Bacteria | yes | yes | no  |
| india | brevundimonas diminuta         | Bacteria | yes | no  | no  |
| india | lactobacillus brevis           | Bacteria | no  | no  | no  |
| india | rabies virus                   | Virus    | yes | yes | yes |
| india | botryosphaeria rhodina         | Fungi    | no  | no  | no  |
| india | vibrio fluvialis               | Bacteria | yes | yes | no  |
| india | human immunodeficiency virus 2 | Virus    | yes | no  | yes |
| india | rubella virus                  | Virus    | yes | no  | no  |
| india | plasmodium cynomolgi           | Protozoa | no  | no  | no  |
| india | rotavirus b                    | Virus    | yes | yes | yes |
| india | edwardsiella ictaluri          | Bacteria | no  | no  | no  |
| india | paracoccus yeei                | Bacteria | no  | no  | no  |
| india | lactobacillus johnsonii        | Bacteria | no  | no  | no  |
| india | enterovibrio norvegicus        | Bacteria | no  | no  | no  |
| india | mycobacterium lentiflavum      | Bacteria | no  | no  | no  |
| india | pseudomonas alcaligenes        | Bacteria | yes | no  | no  |
| india | human herpesvirus 6            | Virus    | yes | no  | no  |
| india | pseudomonas aeruginosa         | Bacteria | yes | yes | yes |
| india | human enterovirus c            | Virus    | yes | no  | no  |

|       |                                           |          |     |     |     |
|-------|-------------------------------------------|----------|-----|-----|-----|
| india | <i>corynebacterium pseudotuberculosis</i> | Bacteria | yes | yes | no  |
| india | <i>staphylococcus caprae</i>              | Bacteria | no  | no  | no  |
| india | <i>edwardsiella tarda</i>                 | Bacteria | yes | yes | no  |
| india | <i>acinetobacter junii</i>                | Bacteria | yes | no  | no  |
| india | <i>cochliobolus spicifer</i>              | Fungi    | no  | no  | no  |
| india | <i>mycoplasma mycoides</i>                | Bacteria | no  | no  | no  |
| india | <i>morganella morganii</i>                | Bacteria | yes | yes | no  |
| india | <i>kluyvera intermedia</i>                | Bacteria | no  | no  | no  |
| india | <i>brucella suis</i>                      | Bacteria | yes | yes | no  |
| india | <i>bordetella avium</i>                   | Bacteria | yes | no  | no  |
| india | canine adenovirus                         | Virus    | no  | no  | no  |
| india | <i>citrobacter braakii</i>                | Bacteria | yes | yes | no  |
| india | <i>mycobacterium celatum</i>              | Bacteria | yes | no  | no  |
| india | <i>gyrodactylus gurleyi</i>               | Helminth | no  | no  | no  |
| india | <i>blautia producta</i>                   | Bacteria | no  | no  | no  |
| india | <i>trichoderma atroviride</i>             | Fungi    | no  | no  | no  |
| india | <i>mycobacterium leprae</i>               | Bacteria | yes | yes | yes |
| india | <i>streptococcus agalactiae</i>           | Bacteria | yes | yes | no  |
| india | ovine herpesvirus 2                       | Virus    | no  | no  | no  |
| india | bovine papillomavirus 1                   | Virus    | no  | no  | no  |
| india | <i>serratia marcescens</i>                | Bacteria | yes | yes | yes |
| india | <i>shewanella haliotis</i>                | Bacteria | no  | no  | no  |
| india | <i>staphylococcus chromogenes</i>         | Bacteria | no  | no  | no  |
| india | <i>burkholderia cenocepacia</i>           | Bacteria | no  | no  | no  |
| india | <i>psychrobacter nivimaris</i>            | Bacteria | no  | no  | no  |
| india | <i>trichoderma longibrachiatum</i>        | Fungi    | no  | no  | no  |
| india | equine adenovirus a                       | Virus    | no  | no  | no  |
| india | <i>brugia malayi</i>                      | Helminth | yes | yes | no  |
| india | avian leukosis virus                      | Virus    | no  | no  | no  |
| india | <i>cedeecea davisae</i>                   | Bacteria | yes | no  | no  |
| india | <i>fusobacterium necrophorum</i>          | Bacteria | yes | yes | no  |
| india | japanese encephalitis virus               | Virus    | yes | yes | yes |
| india | <i>polystoma indicum</i>                  | Helminth | no  | no  | no  |
| india | <i>bacillus subtilis</i>                  | Bacteria | yes | yes | no  |
| india | jc polyomavirus                           | Virus    | no  | no  | no  |
| india | <i>plasmodium falciparum</i>              | Protozoa | yes | no  | yes |
| india | <i>paecilomyces lilacinus</i>             | Fungi    | yes | yes | no  |
| india | <i>bacillus cereus</i>                    | Bacteria | yes | yes | no  |
| india | <i>mycobacterium intracellulare</i>       | Bacteria | no  | no  | no  |
| india | <i>ajellomyces capsulatus</i>             | Fungi    | no  | no  | no  |
| india | <i>aspergillus tubingensis</i>            | Fungi    | no  | no  | no  |
| india | <i>enterobacter hormaechei</i>            | Bacteria | yes | yes | no  |
| india | <i>chryseobacterium indologenes</i>       | Bacteria | no  | no  | no  |
| india | <i>alternaria alternata</i>               | Fungi    | yes | yes | no  |
| india | <i>ignatzschineria indica</i>             | Bacteria | no  | no  | no  |
| india | <i>enterobacter cloacae</i>               | Bacteria | yes | yes | no  |
| india | <i>moraxella bovoculi</i>                 | Bacteria | no  | no  | no  |
| india | <i>delftia tsuruhatensis</i>              | Bacteria | no  | no  | no  |
| india | <i>staphylococcus haemolyticus</i>        | Bacteria | yes | yes | no  |
| india | bovine herpesvirus 1                      | Virus    | no  | no  | no  |

|       |                                         |          |     |     |     |
|-------|-----------------------------------------|----------|-----|-----|-----|
| india | enterobacter asburiae                   | Bacteria | yes | yes | no  |
| india | hepatozoon ursi                         | Protozoa | no  | no  | no  |
| india | conidiobolus coronatus                  | Fungi    | yes | yes | no  |
| india | lysiniabacillus fusiformis              | Bacteria | no  | no  | no  |
| india | human herpesvirus 3                     | Virus    | no  | no  | no  |
| india | actinomyces hyovaginalis                | Bacteria | no  | no  | no  |
| india | measles virus                           | Virus    | yes | yes | yes |
| india | vittaforma corneae                      | Fungi    | yes | no  | no  |
| india | bifurcophaptor indicus                  | Helminth | no  | no  | no  |
| india | bordetella petrii                       | Bacteria | no  | no  | no  |
| india | aspergillus awamori                     | Fungi    | no  | no  | no  |
| india | bacillus amyloliquefaciens              | Bacteria | no  | no  | no  |
| india | gardnerella vaginalis                   | Bacteria | yes | no  | no  |
| india | citrobacter freundii                    | Bacteria | yes | yes | no  |
| india | staphylococcus aureus                   | Bacteria | yes | yes | yes |
| india | tsukamurella tyrosinosolvens            | Bacteria | yes | no  | no  |
| india | arthrographis kalrae                    | Fungi    | no  | no  | no  |
| india | saccharomyces cerevisiae                | Fungi    | yes | no  | no  |
| india | colletotrichum truncatum                | Fungi    | no  | no  | no  |
| india | chaetomium atrobrunneum                 | Fungi    | no  | no  | no  |
| india | fasciola gigantica                      | Helminth | yes | yes | no  |
| india | simian foamy virus                      | Virus    | no  | no  | no  |
| india | mycobacterium bolletii                  | Bacteria | no  | no  | no  |
| india | dengue virus                            | Virus    | no  | no  | no  |
| india | duck adenovirus a                       | Virus    | no  | no  | no  |
| india | aeromonas sobria                        | Bacteria | yes | yes | no  |
| india | leishmania donovani                     | Protozoa | yes | yes | yes |
| india | echinococcus equinus                    | Helminth | no  | no  | no  |
| india | achromobacter denitrificans             | Bacteria | no  | no  | no  |
| india | penicillium citrinum                    | Fungi    | yes | no  | no  |
| india | rhodobacter capsulatus                  | Bacteria | no  | no  | no  |
| india | selinia pulchra                         | Fungi    | no  | no  | no  |
| india | candida zeylanoides                     | Fungi    | yes | no  | no  |
| india | bacillus megaterium                     | Bacteria | no  | no  | no  |
| india | human papillomavirus 16                 | Virus    | no  | no  | no  |
| india | chikungunya virus                       | Virus    | yes | yes | yes |
| india | eimeria acervulina                      | Protozoa | no  | no  | no  |
| india | infectious spleen and kidney necrosis v | Virus    | no  | no  | no  |
| india | gibberella intermedia                   | Fungi    | no  | no  | no  |
| india | aspergillus flavus                      | Fungi    | no  | no  | no  |
| india | aspergillus niger                       | Fungi    | yes | yes | no  |
| india | nocardia cyriacigeorgica                | Bacteria | no  | no  | no  |
| india | vibrio rotiferianus                     | Bacteria | no  | no  | no  |
| india | staphylococcus gallinarum               | Bacteria | no  | no  | no  |
| india | aeromonas jandaei                       | Bacteria | no  | no  | no  |
| india | foot-and-mouth disease virus            | Virus    | no  | no  | no  |
| india | staphylococcus kloosii                  | Bacteria | no  | no  | no  |
| india | microbacterium paraoxydans              | Bacteria | no  | no  | no  |
| india | paenibacillus thiaminolyticus           | Bacteria | no  | no  | no  |
| india | streptococcus pneumoniae                | Bacteria | yes | yes | yes |

|       |                                   |          |     |     |     |
|-------|-----------------------------------|----------|-----|-----|-----|
| india | human metapneumovirus             | Virus    | no  | no  | no  |
| india | albiferox ferrereducens           | Bacteria | no  | no  | no  |
| india | rhodotorula mucilaginosa          | Fungi    | yes | yes | no  |
| india | sapporo virus                     | Virus    | no  | no  | no  |
| india | acinetobacter johnsonii           | Bacteria | yes | no  | no  |
| india | aspergillus terreus               | Fungi    | no  | no  | no  |
| india | staphylococcus sciuri             | Bacteria | no  | no  | no  |
| india | theileria annulata                | Protozoa | no  | no  | no  |
| india | aerococcus viridans               | Bacteria | yes | no  | no  |
| india | wuchereria bancrofti              | Helminth | yes | no  | yes |
| india | porcine parvovirus                | Virus    | no  | no  | no  |
| india | cryptosporidium fayeri            | Protozoa | no  | no  | no  |
| india | microbacterium resistens          | Bacteria | no  | no  | no  |
| india | bacillus pumilus                  | Bacteria | yes | no  | no  |
| india | stenotrophomonas maltophilia      | Bacteria | no  | no  | no  |
| india | classical swine fever virus       | Virus    | no  | no  | no  |
| india | pseudomonas fragi                 | Bacteria | no  | no  | no  |
| india | enterococcus casseliflavus        | Bacteria | yes | no  | no  |
| india | human respiratory syncytial virus | Virus    | yes | no  | no  |
| india | leptonema illini                  | Bacteria | no  | no  | no  |
| india | fasciolopsis buski                | Helminth | yes | yes | no  |
| india | streptococcus pseudopneumoniae    | Bacteria | no  | no  | no  |
| india | cupriavidus basilensis            | Bacteria | no  | no  | no  |
| india | cupriavidus taiwanensis           | Bacteria | no  | no  | no  |
| india | avian orthoreovirus               | Virus    | no  | no  | no  |
| india | cronobacter turicensis            | Bacteria | no  | no  | no  |
| india | malassezia sympodialis            | Fungi    | yes | yes | no  |
| india | helicobacter pylori               | Bacteria | yes | yes | no  |
| india | schizophyllum commune             | Fungi    | yes | no  | no  |
| india | primate t-lymphotropic virus 1    | Virus    | no  | no  | no  |
| india | ochrobactrum intermedium          | Bacteria | no  | no  | no  |
| india | hepatitis e virus                 | Virus    | yes | yes | yes |
| india | candida parapsilosis              | Fungi    | yes | yes | no  |
| india | pichia kudriavzevii               | Fungi    | no  | no  | no  |
| india | staphylococcus saprophyticus      | Bacteria | yes | no  | no  |
| india | gallid herpesvirus 2              | Virus    | no  | no  | no  |
| india | shigella sonnei                   | Bacteria | yes | yes | no  |
| india | pseudomonas oryzihabitans         | Bacteria | no  | no  | no  |
| india | acinetobacter ursingii            | Bacteria | no  | no  | no  |
| india | infectious bursal disease virus   | Virus    | no  | no  | no  |
| india | candida rugosa                    | Fungi    | yes | no  | no  |
| india | mycobacterium bacteremicum        | Bacteria | no  | no  | no  |
| india | sundanonchus behuri               | Helminth | no  | no  | no  |
| india | neisseria meningitidis            | Bacteria | yes | no  | yes |
| india | chicken anemia virus              | Virus    | no  | no  | no  |
| india | fusarium chlamydosporum           | Fungi    | yes | no  | no  |
| india | penicillium brocae                | Fungi    | no  | no  | no  |
| india | bacillus firmus                   | Bacteria | no  | no  | no  |
| india | vaccinia virus                    | Virus    | no  | no  | no  |
| india | aspergillus fumigatus             | Fungi    | no  | no  | no  |

|       |                                |          |     |     |     |
|-------|--------------------------------|----------|-----|-----|-----|
| india | candida tropicalis             | Fungi    | yes | yes | no  |
| india | bacillus thioeparans           | Bacteria | no  | no  | no  |
| india | lysinibacillus sphaericus      | Bacteria | no  | no  | no  |
| india | enterococcus gallinarum        | Bacteria | yes | no  | no  |
| india | eikenella corrodens            | Bacteria | yes | yes | no  |
| india | fusarium incarnatum            | Fungi    | yes | no  | no  |
| india | kocuria marina                 | Bacteria | no  | no  | no  |
| india | bacillus mojavenis             | Bacteria | no  | no  | no  |
| india | microbacterium oxydans         | Bacteria | no  | no  | no  |
| india | rotavirus c                    | Virus    | yes | yes | yes |
| india | corynebacterium propinquum     | Bacteria | yes | no  | no  |
| india | fowlpox virus                  | Virus    | no  | no  | no  |
| india | bacillus clausii               | Bacteria | no  | no  | no  |
| india | agrobacterium tumefaciens      | Bacteria | no  | no  | no  |
| india | pediococcus pentosaceus        | Bacteria | no  | no  | no  |
| india | achromobacter xylooxidans      | Bacteria | yes | no  | no  |
| india | aquareovirus c                 | Virus    | no  | no  | no  |
| india | enterococcus mundtii           | Bacteria | yes | no  | no  |
| india | dichelobacter nodosus          | Bacteria | yes | yes | no  |
| india | yokenella regensburgei         | Bacteria | no  | no  | no  |
| india | neisseria gonorrhoeae          | Bacteria | yes | no  | yes |
| india | candida albicans               | Fungi    | yes | yes | yes |
| india | aeromonas veronii              | Bacteria | yes | no  | yes |
| india | leuconostoc mesenteroides      | Bacteria | no  | no  | no  |
| india | haemonchus contortus           | Helminth | yes | yes | no  |
| india | enterococcus faecium           | Bacteria | yes | yes | yes |
| india | influenza b virus              | Virus    | yes | yes | no  |
| india | mycoplasma gallisepticum       | Bacteria | no  | no  | no  |
| india | lactobacillus casei            | Bacteria | no  | no  | no  |
| india | clavospora lusitaniae          | Fungi    | no  | no  | no  |
| india | elizabethkingia meningoseptica | Bacteria | no  | no  | no  |
| india | arcobacter skirrowii           | Bacteria | no  | no  | no  |
| india | rhodococcus erythropolis       | Bacteria | yes | no  | no  |
| india | escherichia coli               | Bacteria | yes | yes | yes |
| india | acremonium strictum            | Fungi    | yes | no  | no  |
| india | nocardia farcinica             | Bacteria | yes | yes | no  |
| india | clostridium sporogenes         | Bacteria | yes | yes | no  |
| india | bovine viral diarrhea virus 2  | Virus    | no  | no  | no  |
| india | cyprinid herpesvirus 3         | Virus    | no  | no  | no  |
| india | mycoplasma agalactiae          | Bacteria | no  | no  | no  |
| india | vibrio aestuarianus            | Bacteria | no  | no  | no  |
| india | paracoccus marinus             | Bacteria | no  | no  | no  |
| india | burkholderia mallei            | Bacteria | yes | yes | no  |
| india | arthrobacter creatinolyticus   | Bacteria | no  | no  | no  |
| india | chaetomium globosum            | Fungi    | yes | no  | no  |
| india | cooperia pectinata             | Helminth | no  | no  | no  |
| india | acinetobacter lwoffii          | Bacteria | yes | no  | no  |
| india | aeromonas allosaccharophila    | Bacteria | no  | no  | no  |
| india | microbacterium testaceum       | Bacteria | no  | no  | no  |
| india | hepatitis a virus              | Virus    | yes | yes | yes |

|       |                                  |          |     |     |     |
|-------|----------------------------------|----------|-----|-----|-----|
| india | orientia tsutsugamushi           | Bacteria | yes | yes | no  |
| india | citrobacter koseri               | Bacteria | yes | yes | no  |
| india | kocuria polaris                  | Bacteria | no  | no  | no  |
| india | peste-des-petits-ruminants virus | Virus    | no  | no  | no  |
| india | lactobacillus rhamnosus          | Bacteria | no  | no  | no  |
| india | eubacterium hallii               | Bacteria | no  | no  | no  |
| india | comamonas testosteroni           | Bacteria | yes | no  | no  |
| india | mecistocirrus digitatus          | Helminth | yes | yes | no  |
| india | reticuloendotheliosis virus      | Virus    | no  | no  | no  |
| india | ceriporia lacerata               | Fungi    | no  | no  | no  |
| india | human enterovirus d              | Virus    | yes | no  | no  |
| india | plasmodium vivax                 | Protozoa | yes | no  | yes |
| india | providencia rettgeri             | Bacteria | yes | yes | no  |
| india | bacteroides ovatus               | Bacteria | yes | no  | no  |
| india | human herpesvirus 5              | Virus    | yes | no  | yes |
| india | rhodococcus equi                 | Bacteria | yes | yes | no  |
| india | dactylogyroides longicirrus      | Helminth | no  | no  | no  |
| india | bunyamwera virus                 | Virus    | yes | yes | no  |
| india | echinococcus granulosus          | Helminth | yes | yes | yes |
| india | pepper mild mottle virus         | Virus    | no  | no  | no  |
| india | klebsiella pneumoniae            | Bacteria | yes | yes | yes |
| india | vibrio parahaemolyticus          | Bacteria | yes | yes | yes |
| india | microbacterium esteraromaticum   | Bacteria | no  | no  | no  |
| india | neopolystoma palpebrae           | Helminth | no  | no  | no  |
| india | trichophyton rubrum              | Fungi    | yes | yes | no  |
| india | hepatitis c virus                | Virus    | yes | no  | yes |
| india | rhinosporidium seeberi           | Others   | yes | yes | no  |
| india | listeria monocytogenes           | Bacteria | yes | yes | yes |
| india | psychrobacter glacincola         | Bacteria | no  | no  | no  |
| india | bacteroides vulgatus             | Bacteria | yes | no  | no  |
| india | nocardiopsis alba                | Bacteria | no  | no  | no  |
| india | emericella nidulans              | Fungi    | no  | no  | no  |
| india | pantoea agglomerans              | Bacteria | yes | yes | no  |
| india | shigella dysenteriae             | Bacteria | yes | yes | yes |
| india | vibrio alginolyticus             | Bacteria | yes | yes | no  |
| india | staphylococcus pasteurii         | Bacteria | no  | no  | no  |
| india | malassezia globosa               | Fungi    | yes | yes | no  |
| india | hepatozoon canis                 | Protozoa | no  | no  | no  |
| india | leptosphaeria tompkinsii         | Fungi    | yes | no  | no  |
| india | escherichia fergusonii           | Bacteria | no  | no  | no  |
| india | sheeppox virus                   | Virus    | no  | no  | no  |
| india | pseudomonas chlororaphis         | Bacteria | no  | no  | no  |
| india | aeromonas hydrophila             | Bacteria | yes | yes | yes |
| india | shewanella algae                 | Bacteria | no  | no  | no  |
| india | brucella melitensis              | Bacteria | yes | yes | yes |
| india | babesia bigemina                 | Protozoa | no  | no  | no  |
| india | dugbe virus                      | Virus    | yes | yes | no  |
| india | staphylococcus hyicus            | Bacteria | yes | yes | no  |
| india | streptococcus dysgalactiae       | Bacteria | no  | no  | no  |
| india | beauveria bassiana               | Fungi    | yes | no  | no  |

|       |                                |          |     |     |     |
|-------|--------------------------------|----------|-----|-----|-----|
| india | roseburia intestinalis         | Bacteria | no  | no  | no  |
| india | exiguobacterium indicum        | Bacteria | no  | no  | no  |
| india | mycobacterium tuberculosis     | Bacteria | yes | yes | yes |
| india | acinetobacter radioresistens   | Bacteria | yes | no  | no  |
| india | pseudomonas monteilii          | Bacteria | no  | no  | no  |
| india | influenza a virus              | Virus    | yes | yes | yes |
| india | salmonella enterica            | Bacteria | no  | no  | no  |
| india | bacillus coagulans             | Bacteria | yes | yes | no  |
| india | bacillus aquimaris             | Bacteria | no  | no  | no  |
| india | human papillomavirus 53        | Virus    | no  | no  | no  |
| india | paenibacillus alvei            | Bacteria | yes | no  | no  |
| india | enterobacter cancerogenus      | Bacteria | yes | yes | no  |
| india | lactobacillus helveticus       | Bacteria | no  | no  | no  |
| india | fusarium oxysporum             | Fungi    | yes | no  | yes |
| india | human immunodeficiency virus 1 | Virus    | yes | no  | yes |
| india | faecalibacterium prausnitzii   | Bacteria | no  | no  | no  |
| india | pseudomonas plecoglossicida    | Bacteria | no  | no  | no  |
| india | canine distemper virus         | Virus    | no  | no  | no  |
| india | giardia intestinalis           | Protozoa | no  | no  | no  |
| india | pseudomonas xanthomarina       | Bacteria | no  | no  | no  |
| india | bacillus circulans             | Bacteria | yes | no  | no  |
| india | hepatitis b virus              | Virus    | yes | no  | yes |
| india | aspergillus flavipes           | Fungi    | yes | no  | no  |
| india | pneumocystis carinii           | Fungi    | yes | yes | yes |
| india | aichi virus                    | Virus    | no  | no  | no  |
| india | oceanobacillus oncorhynchi     | Bacteria | no  | no  | no  |
| india | velasquezotrema tripurensis    | Helminth | no  | no  | no  |
| india | human herpesvirus 2            | Virus    | no  | no  | no  |
| india | vibrio harveyi                 | Bacteria | no  | no  | no  |
| india | aeromonas salmonicida          | Bacteria | no  | no  | no  |
| india | burkholderia multivorans       | Bacteria | no  | no  | no  |
| india | paragonimus heterotremus       | Helminth | yes | yes | no  |
| india | eurotium amstelodami           | Fungi    | no  | no  | no  |
| india | lactobacillus paracasei        | Bacteria | no  | no  | no  |
| india | brevibacillus brevis           | Bacteria | yes | no  | no  |
| india | meyerozyma guilliermondii      | Fungi    | no  | no  | no  |
| india | pseudomonas fluorescens        | Bacteria | yes | no  | no  |
| india | cronobacter sakazakii          | Bacteria | no  | no  | no  |
| india | aeromonas bivalvium            | Bacteria | no  | no  | no  |
| india | cochliobolus lunatus           | Fungi    | no  | no  | no  |
| india | trichosporon asahii            | Fungi    | yes | yes | no  |
| india | streptococcus mitis            | Bacteria | yes | no  | no  |
| india | rotavirus d                    | Virus    | yes | yes | no  |
| india | staphylococcus cohnii          | Bacteria | no  | no  | no  |
| india | bacillus anthracis             | Bacteria | yes | yes | yes |
| india | bacillus mycoides              | Bacteria | yes | no  | no  |
| india | gallid herpesvirus 1           | Virus    | no  | no  | no  |
| india | veronaea botryosa              | Fungi    | yes | no  | no  |
| india | gastrothylax crumenifer        | Helminth | no  | no  | no  |
| india | shigella flexneri              | Bacteria | yes | yes | no  |

|       |                                |          |     |     |     |
|-------|--------------------------------|----------|-----|-----|-----|
| india | brucella microti               | Bacteria | no  | no  | no  |
| india | kytrococcus schroeteri         | Bacteria | no  | no  | no  |
| india | vibrio cholerae                | Bacteria | yes | no  | yes |
| india | aspergillus tamarii            | Fungi    | no  | no  | no  |
| india | micrococcus yunnanensis        | Bacteria | no  | no  | no  |
| india | aeromonas enteropelogenes      | Bacteria | no  | no  | no  |
| india | janibacter anophelis           | Bacteria | no  | no  | no  |
| india | cryptococcus gattii            | Fungi    | no  | no  | no  |
| india | bacillus tequilensis           | Bacteria | no  | no  | no  |
| india | propionibacterium acnes        | Bacteria | yes | yes | no  |
| india | taenia taeniaeformis           | Helminth | yes | yes | no  |
| india | cryptococcus laurentii         | Fungi    | no  | no  | no  |
| india | pseudomonas putida             | Bacteria | yes | no  | no  |
| india | vibrio proteolyticus           | Bacteria | no  | no  | no  |
| india | entamoeba histolytica          | Protozoa | yes | yes | no  |
| india | eimeria mitis                  | Protozoa | no  | no  | no  |
| india | enterobacter aerogenes         | Bacteria | yes | yes | no  |
| india | staphylococcus succinus        | Bacteria | no  | no  | no  |
| india | eimeria necatrix               | Protozoa | no  | no  | no  |
| india | pseudomonas poae               | Bacteria | no  | no  | no  |
| india | bacillus flexus                | Bacteria | no  | no  | no  |
| india | cochliobolus cynodontis        | Fungi    | no  | no  | no  |
| india | ascaris lumbricoides           | Helminth | yes | yes | no  |
| india | lactobacillus reuteri          | Bacteria | no  | no  | no  |
| india | brucella abortus               | Bacteria | yes | yes | no  |
| india | yersinia ruckeri               | Bacteria | yes | yes | no  |
| india | lactococcus lactis             | Bacteria | no  | no  | no  |
| india | providencia vermicola          | Bacteria | no  | no  | no  |
| india | dietzia natronolimnaea         | Bacteria | no  | no  | no  |
| india | mycobacterium kansasii         | Bacteria | yes | yes | no  |
| india | taenia ovis                    | Helminth | no  | no  | no  |
| india | bacillus thuringiensis         | Bacteria | yes | no  | no  |
| india | camelpox virus                 | Virus    | no  | no  | no  |
| india | fusarium sacchari              | Fungi    | yes | no  | no  |
| india | variola virus                  | Virus    | no  | no  | no  |
| india | vibrio mimicus                 | Bacteria | yes | yes | no  |
| india | cryptosporidium parvum         | Protozoa | yes | yes | yes |
| india | beak and feather disease virus | Virus    | no  | no  | no  |
| india | pseudocowpox virus             | Virus    | yes | yes | no  |
| india | mycobacterium fortuitum        | Bacteria | no  | no  | no  |
| india | candida orthopsilosis          | Fungi    | no  | no  | no  |
| india | yersinia pestis                | Bacteria | yes | yes | yes |
| india | leishmania tropica             | Protozoa | yes | yes | no  |
| india | eimeria maxima                 | Protozoa | no  | no  | no  |
| india | campylobacter coli             | Bacteria | yes | yes | no  |
| india | dirofilaria immitis            | Helminth | yes | yes | no  |
| india | cryptococcus neoformans        | Fungi    | yes | yes | yes |
| india | acinetobacter baumannii        | Bacteria | yes | no  | no  |
| india | west Nile virus                | Virus    | yes | yes | yes |
| india | toxoplasma gondii              | Protozoa | yes | yes | yes |



|       |                                |          |     |     |     |
|-------|--------------------------------|----------|-----|-----|-----|
| india | plectosphaerella cucumerina    | Fungi    | no  | no  | no  |
| india | orf virus                      | Virus    | yes | yes | no  |
| india | nipah virus                    | Virus    | yes | yes | yes |
| india | providencia alcalifaciens      | Bacteria | yes | yes | no  |
| india | aspergillus oryzae             | Fungi    | yes | no  | no  |
| india | bovine viral diarrhea virus 1  | Virus    | no  | no  | no  |
| india | geobacillus stearothermophilus | Bacteria | no  | no  | no  |
| india | paragonimus westermani         | Helminth | yes | yes | no  |
| india | proteus vulgaris               | Bacteria | yes | yes | no  |
| india | human enterovirus a            | Virus    | yes | no  | no  |
| india | rotavirus a                    | Virus    | yes | yes | yes |
| india | malassezia restricta           | Fungi    | yes | yes | no  |
| india | pneumocystis jirovecii         | Fungi    | no  | no  | no  |
| india | burkholderia cepacia           | Bacteria | yes | no  | no  |
| india | staphylococcus hominis         | Bacteria | no  | no  | no  |
| india | cladosporium cladosporioides   | Fungi    | yes | no  | no  |
| india | human picobirnavirus           | Virus    | no  | no  | no  |
| india | yersinia intermedia            | Bacteria | yes | yes | no  |
| india | bifidobacterium catenulatum    | Bacteria | no  | no  | no  |
| india | trichomonas vaginalis          | Protozoa | yes | no  | yes |
| india | fowl adenovirus d              | Virus    | no  | no  | no  |
| india | clostridium perfringens        | Bacteria | yes | yes | no  |
| india | exiguobacterium acetylicum     | Bacteria | no  | no  | no  |
| india | feline panleukopenia virus     | Virus    | no  | no  | no  |
| india | micrococcus luteus             | Bacteria | no  | no  | no  |
| india | alcaligenes faecalis           | Bacteria | no  | no  | no  |
| india | paragonimus skrjabini          | Helminth | yes | yes | no  |
| india | arthroderma fulvum             | Fungi    | no  | no  | no  |
| india | hepatozoon felis               | Protozoa | no  | no  | no  |
| india | vibrio campbellii              | Bacteria | no  | no  | no  |
| india | debaryomyces hansenii          | Fungi    | no  | no  | no  |
| india | geosmithia argillacea          | Fungi    | no  | no  | no  |
| india | thottapalayam virus            | Virus    | no  | no  | no  |
| india | newcastle disease virus        | Virus    | yes | yes | no  |
| india | entamoeba moshkovskii          | Protozoa | yes | no  | no  |
| india | mycobacterium simiae           | Bacteria | yes | yes | no  |
| india | malassezia furfur              | Fungi    | yes | yes | no  |
| india | pseudomonas otitidis           | Bacteria | no  | no  | no  |
| india | yarrowia lipolytica            | Fungi    | no  | no  | no  |
| india | human astrovirus               | Virus    | yes | no  | yes |
| india | enterococcus faecalis          | Bacteria | yes | yes | yes |
| india | human parainfluenza virus 1    | Virus    | yes | no  | no  |
| india | sandfly fever naples virus     | Virus    | yes | yes | yes |
| india | paracoccus marcusii            | Bacteria | no  | no  | no  |
| india | bluetongue virus               | Virus    | no  | no  | no  |
| india | chryseobacterium balustinum    | Bacteria | yes | no  | no  |
| india | chlamydia trachomatis          | Bacteria | yes | yes | yes |
| india | taenia solium                  | Helminth | yes | no  | yes |
| india | mumps virus                    | Virus    | yes | no  | no  |
| india | human adenovirus f             | Virus    | yes | no  | no  |

|           |                                      |          |     |     |     |
|-----------|--------------------------------------|----------|-----|-----|-----|
| india     | <i>lactobacillus delbrueckii</i>     | Bacteria | no  | no  | no  |
| india     | <i>acinetobacter calcoaceticus</i>   | Bacteria | yes | no  | no  |
| india     | <i>ralstonia pickettii</i>           | Bacteria | yes | no  | no  |
| india     | <i>polystomoides siebenrockiella</i> | Helminth | no  | no  | no  |
| india     | <i>mycobacterium neoaurum</i>        | Bacteria | no  | no  | no  |
| india     | <i>cladosporium oxysporum</i>        | Fungi    | yes | no  | no  |
| india     | <i>aeromonas caviae</i>              | Bacteria | yes | yes | yes |
| india     | turkeypox virus                      | Virus    | no  | no  | no  |
| india     | <i>wickerhamomyces anomalus</i>      | Fungi    | no  | no  | no  |
| india     | <i>bacillus licheniformis</i>        | Bacteria | yes | yes | no  |
| india     | <i>staphylococcus epidermidis</i>    | Bacteria | yes | yes | yes |
| india     | chandipura virus                     | Virus    | yes | yes | no  |
| india     | <i>pseudomonas pseudoalcaligenes</i> | Bacteria | yes | no  | no  |
| india     | <i>staphylococcus capitis</i>        | Bacteria | no  | no  | no  |
| india     | human herpesvirus 1                  | Virus    | no  | no  | no  |
| india     | <i>desulfovibrio desulfuricans</i>   | Bacteria | no  | no  | no  |
| india     | <i>delftia acidovorans</i>           | Bacteria | yes | no  | no  |
| india     | <i>rhodococcus fascians</i>          | Bacteria | yes | no  | no  |
| india     | fowl adenovirus c                    | Virus    | no  | no  | no  |
| india     | <i>yersinia enterocolitica</i>       | Bacteria | yes | yes | yes |
| india     | <i>bacillus infantis</i>             | Bacteria | no  | no  | no  |
| india     | <i>yersinia frederiksenii</i>        | Bacteria | yes | yes | no  |
| india     | <i>mycobacterium avium</i>           | Bacteria | yes | yes | yes |
| india     | goatpox virus                        | Virus    | no  | no  | no  |
| india     | <i>eimeria praecox</i>               | Protozoa | no  | no  | no  |
| india     | <i>methylobacterium gregans</i>      | Bacteria | no  | no  | no  |
| india     | <i>ochrobactrum pseudintermedium</i> | Bacteria | no  | no  | no  |
| india     | <i>lactobacillus plantarum</i>       | Bacteria | no  | no  | no  |
| india     | <i>plasmodium berghei</i>            | Protozoa | no  | no  | no  |
| india     | <i>acinetobacter haemolyticus</i>    | Bacteria | yes | no  | no  |
| india     | <i>vibrio hepatarius</i>             | Bacteria | no  | no  | no  |
| india     | <i>eimeria tenella</i>               | Protozoa | no  | no  | no  |
| india     | avian coronavirus                    | Virus    | no  | no  | no  |
| india     | <i>vibrio azureus</i>                | Bacteria | no  | no  | no  |
| indonesia | <i>clavispora lusitaniae</i>         | Fungi    | no  | no  | no  |
| indonesia | <i>campylobacter jejuni</i>          | Bacteria | yes | yes | yes |
| indonesia | infectious bursal disease virus      | Virus    | no  | no  | no  |
| indonesia | <i>gnathostoma spinigerum</i>        | Helminth | yes | yes | no  |
| indonesia | seoul virus                          | Virus    | yes | yes | yes |
| indonesia | <i>fusarium oxysporum</i>            | Fungi    | yes | no  | yes |
| indonesia | <i>leptospira interrogans</i>        | Bacteria | yes | yes | yes |
| indonesia | measles virus                        | Virus    | yes | yes | yes |
| indonesia | jc polyomavirus                      | Virus    | no  | no  | no  |
| indonesia | <i>gibberella intermedia</i>         | Fungi    | no  | no  | no  |
| indonesia | <i>escherichia coli</i>              | Bacteria | yes | yes | yes |
| indonesia | foot-and-mouth disease virus         | Virus    | no  | no  | no  |
| indonesia | <i>bacillus aquimaris</i>            | Bacteria | no  | no  | no  |
| indonesia | <i>plasmodium falciparum</i>         | Protozoa | yes | no  | yes |
| indonesia | influenza a virus                    | Virus    | yes | yes | yes |
| indonesia | <i>mycobacterium leprae</i>          | Bacteria | yes | yes | yes |

|           |                                         |          |     |     |     |
|-----------|-----------------------------------------|----------|-----|-----|-----|
| indonesia | yersinia pestis                         | Bacteria | yes | yes | yes |
| indonesia | schistosoma incognitum                  | Helminth | no  | no  | no  |
| indonesia | botryosphaeria rhodina                  | Fungi    | no  | no  | no  |
| indonesia | cladosporium cladosporioides            | Fungi    | yes | no  | no  |
| indonesia | rabies virus                            | Virus    | yes | yes | yes |
| indonesia | neisseria gonorrhoeae                   | Bacteria | yes | no  | yes |
| indonesia | human immunodeficiency virus 1          | Virus    | yes | no  | yes |
| indonesia | chikungunya virus                       | Virus    | yes | yes | yes |
| indonesia | theileria orientalis                    | Protozoa | no  | no  | no  |
| indonesia | schizophyllum commune                   | Fungi    | yes | no  | no  |
| indonesia | leuconostoc mesenteroides               | Bacteria | no  | no  | no  |
| indonesia | variola virus                           | Virus    | no  | no  | no  |
| indonesia | plasmodium vivax                        | Protozoa | yes | no  | yes |
| indonesia | helicobacter pylori                     | Bacteria | yes | yes | no  |
| indonesia | brevundimonas diminuta                  | Bacteria | yes | no  | no  |
| indonesia | trypanosoma lewisi                      | Protozoa | no  | no  | no  |
| indonesia | fusarium solani                         | Fungi    | yes | yes | yes |
| indonesia | trichosporon asahii                     | Fungi    | yes | yes | no  |
| indonesia | ajellomyces capsulatus                  | Fungi    | no  | no  | no  |
| indonesia | hepatitis c virus                       | Virus    | yes | no  | yes |
| indonesia | brugia timori                           | Helminth | yes | no  | no  |
| indonesia | entamoeba histolytica                   | Protozoa | yes | yes | no  |
| indonesia | bacillus amyloliquefaciens              | Bacteria | no  | no  | no  |
| indonesia | primate t-lymphotropic virus 1          | Virus    | no  | no  | no  |
| indonesia | pichia kudriavzevii                     | Fungi    | no  | no  | no  |
| indonesia | hepatitis e virus                       | Virus    | yes | yes | yes |
| indonesia | infectious spleen and kidney necrosis v | Virus    | no  | no  | no  |
| indonesia | fusarium incarnatum                     | Fungi    | yes | no  | no  |
| indonesia | dengue virus                            | Virus    | no  | no  | no  |
| indonesia | brugia malayi                           | Helminth | yes | yes | no  |
| indonesia | bluetongue virus                        | Virus    | no  | no  | no  |
| indonesia | bovine immunodeficiency virus           | Virus    | no  | no  | no  |
| indonesia | taenia solium                           | Helminth | yes | no  | yes |
| indonesia | plasmodium ovale                        | Protozoa | yes | no  | no  |
| indonesia | burkholderia cenocepacia                | Bacteria | no  | no  | no  |
| indonesia | cochliobolus lunatus                    | Fungi    | no  | no  | no  |
| indonesia | cyprinid herpesvirus 3                  | Virus    | no  | no  | no  |
| indonesia | bacillus megaterium                     | Bacteria | no  | no  | no  |
| indonesia | candida glabrata                        | Fungi    | yes | yes | yes |
| indonesia | human enterovirus c                     | Virus    | yes | no  | no  |
| indonesia | vibrio cholerae                         | Bacteria | yes | no  | yes |
| indonesia | classical swine fever virus             | Virus    | no  | no  | no  |
| indonesia | taenia asiatica                         | Helminth | no  | no  | no  |
| indonesia | taenia saginata                         | Helminth | yes | yes | no  |
| indonesia | fasciola gigantica                      | Helminth | yes | yes | no  |
| indonesia | salmonella enterica                     | Bacteria | no  | no  | no  |
| indonesia | saccharomyces cerevisiae                | Fungi    | yes | no  | no  |
| indonesia | fusarium sacchari                       | Fungi    | yes | no  | no  |
| indonesia | burkholderia cepacia                    | Bacteria | yes | no  | no  |
| indonesia | schistosoma japonicum                   | Helminth | yes | yes | no  |

|           |                                |          |     |     |     |
|-----------|--------------------------------|----------|-----|-----|-----|
| indonesia | toxoplasma gondii              | Protozoa | yes | yes | yes |
| indonesia | brevibacillus brevis           | Bacteria | yes | no  | no  |
| indonesia | newcastle disease virus        | Virus    | yes | yes | no  |
| indonesia | aspergillus penicillioides     | Fungi    | no  | no  | no  |
| indonesia | plasmodium malariae            | Protozoa | yes | yes | no  |
| indonesia | hepatitis a virus              | Virus    | yes | yes | yes |
| indonesia | wickerhamomyces anomalus       | Fungi    | no  | no  | no  |
| indonesia | bacillus subtilis              | Bacteria | yes | yes | no  |
| indonesia | simian foamy virus             | Virus    | no  | no  | no  |
| indonesia | hepatitis b virus              | Virus    | yes | no  | yes |
| indonesia | brevibacillus agri             | Bacteria | no  | no  | no  |
| indonesia | burkholderia mallei            | Bacteria | yes | yes | no  |
| indonesia | ophiostoma stenoceras          | Fungi    | no  | no  | no  |
| indonesia | human immunodeficiency virus 2 | Virus    | yes | no  | yes |
| indonesia | japanese encephalitis virus    | Virus    | yes | yes | yes |
| indonesia | plasmodium knowlesi            | Protozoa | yes | yes | no  |
| indonesia | rhodococcus erythropolis       | Bacteria | yes | no  | no  |
| iran      | stenotrophomonas maltophilia   | Bacteria | no  | no  | no  |
| iran      | neisseria meningitidis         | Bacteria | yes | no  | yes |
| iran      | bovine immunodeficiency virus  | Virus    | no  | no  | no  |
| iran      | pseudomonas stutzeri           | Bacteria | yes | no  | no  |
| iran      | aeromonas hydrophila           | Bacteria | yes | yes | yes |
| iran      | cryptococcus neoformans        | Fungi    | yes | yes | yes |
| iran      | pasteurella multocida          | Bacteria | yes | yes | no  |
| iran      | arthroderma gypseum            | Fungi    | no  | no  | no  |
| iran      | trichostrongylus colubriformis | Helminth | yes | yes | no  |
| iran      | klebsiella oxytoca             | Bacteria | yes | yes | no  |
| iran      | cryptosporidium meleagridis    | Protozoa | no  | no  | no  |
| iran      | rabies virus                   | Virus    | yes | yes | yes |
| iran      | encephalitozoon cuniculi       | Fungi    | yes | yes | yes |
| iran      | avian metapneumovirus          | Virus    | no  | no  | no  |
| iran      | enterocytozoon bienersi        | Fungi    | yes | no  | yes |
| iran      | lactobacillus casei            | Bacteria | no  | no  | no  |
| iran      | fasciola gigantica             | Helminth | yes | yes | no  |
| iran      | taenia ovis                    | Helminth | no  | no  | no  |
| iran      | brevundimonas diminuta         | Bacteria | yes | no  | no  |
| iran      | cordyceps bassiana             | Fungi    | no  | no  | no  |
| iran      | human adenovirus f             | Virus    | yes | no  | no  |
| iran      | measles virus                  | Virus    | yes | yes | yes |
| iran      | lactococcus garvieae           | Bacteria | no  | no  | no  |
| iran      | leishmania donovani            | Protozoa | yes | yes | yes |
| iran      | colletotrichum dematium        | Fungi    | yes | no  | no  |
| iran      | helicobacter pylori            | Bacteria | yes | yes | no  |
| iran      | microsporium gallinae          | Fungi    | yes | yes | no  |
| iran      | leptospira interrogans         | Bacteria | yes | yes | yes |
| iran      | gibberella intermedia          | Fungi    | no  | no  | no  |
| iran      | bacillus megaterium            | Bacteria | no  | no  | no  |
| iran      | wuchereria bancrofti           | Helminth | yes | no  | yes |
| iran      | echinococcus canadensis        | Helminth | no  | no  | no  |
| iran      | cellulosimicrobium cellulans   | Bacteria | no  | no  | no  |

|      |                                   |          |     |     |     |
|------|-----------------------------------|----------|-----|-----|-----|
| iran | human herpesvirus 2               | Virus    | no  | no  | no  |
| iran | arthroderma benhamiae             | Fungi    | no  | no  | no  |
| iran | pediococcus acidilactici          | Bacteria | no  | no  | no  |
| iran | trichoderma atroviride            | Fungi    | no  | no  | no  |
| iran | achromobacter piechaudii          | Bacteria | yes | no  | no  |
| iran | bacillus flexus                   | Bacteria | no  | no  | no  |
| iran | human enterovirus b               | Virus    | yes | no  | yes |
| iran | human respiratory syncytial virus | Virus    | yes | no  | no  |
| iran | shigella sonnei                   | Bacteria | yes | yes | no  |
| iran | brevibacillus agri                | Bacteria | no  | no  | no  |
| iran | haemonchus contortus              | Helminth | yes | yes | no  |
| iran | meyerozyma guilliermondii         | Fungi    | no  | no  | no  |
| iran | norwalk virus                     | Virus    | yes | no  | yes |
| iran | streptococcus agalactiae          | Bacteria | yes | yes | no  |
| iran | kocuria marina                    | Bacteria | no  | no  | no  |
| iran | theileria ovis                    | Protozoa | no  | no  | no  |
| iran | rotavirus a                       | Virus    | yes | yes | yes |
| iran | trichophyton violaceum            | Fungi    | yes | yes | no  |
| iran | theileria lestoquardi             | Protozoa | no  | no  | no  |
| iran | bacillus subtilis                 | Bacteria | yes | yes | no  |
| iran | aeromonas jandaei                 | Bacteria | no  | no  | no  |
| iran | human enterovirus a               | Virus    | yes | no  | no  |
| iran | lactobacillus brevis              | Bacteria | no  | no  | no  |
| iran | aspergillus terreus               | Fungi    | no  | no  | no  |
| iran | clostridium difficile             | Bacteria | yes | yes | yes |
| iran | trichophyton rubrum               | Fungi    | yes | yes | no  |
| iran | pseudomonas putida                | Bacteria | yes | no  | no  |
| iran | human immunodeficiency virus 1    | Virus    | yes | no  | yes |
| iran | borrelia persica                  | Bacteria | yes | yes | no  |
| iran | serratia marcescens               | Bacteria | yes | yes | yes |
| iran | human herpesvirus 5               | Virus    | yes | no  | yes |
| iran | chlamydomyxa psittaci             | Bacteria | yes | yes | no  |
| iran | human papillomavirus 16           | Virus    | no  | no  | no  |
| iran | sheeppox virus                    | Virus    | no  | no  | no  |
| iran | arthroderma uncinatum             | Fungi    | no  | no  | no  |
| iran | foot-and-mouth disease virus      | Virus    | no  | no  | no  |
| iran | gallid herpesvirus 1              | Virus    | no  | no  | no  |
| iran | kurthia gibsonii                  | Bacteria | no  | no  | no  |
| iran | cronobacter sakazakii             | Bacteria | no  | no  | no  |
| iran | bacillus amyloliquefaciens        | Bacteria | no  | no  | no  |
| iran | human immunodeficiency virus 2    | Virus    | yes | no  | yes |
| iran | klebsiella pneumoniae             | Bacteria | yes | yes | yes |
| iran | gongylonema pulchrum              | Helminth | yes | yes | no  |
| iran | candida membranifaciens           | Fungi    | no  | no  | no  |
| iran | mycoplasma hominis                | Bacteria | yes | no  | no  |
| iran | rhodotorula mucilaginosa          | Fungi    | yes | yes | no  |
| iran | influenza a virus                 | Virus    | yes | yes | yes |
| iran | trichoderma longibrachiatum       | Fungi    | no  | no  | no  |
| iran | strongyloides stercoralis         | Helminth | yes | yes | yes |
| iran | theileria annulata                | Protozoa | no  | no  | no  |

|      |                                      |          |     |     |     |
|------|--------------------------------------|----------|-----|-----|-----|
| iran | spirocerca lupi                      | Helminth | yes | yes | no  |
| iran | giardia intestinalis                 | Protozoa | no  | no  | no  |
| iran | corynebacterium jeikeium             | Bacteria | yes | no  | no  |
| iran | pseudomonas fluorescens              | Bacteria | yes | no  | no  |
| iran | teladorsagia circumcincta            | Helminth | yes | yes | no  |
| iran | cryptosporidium bovis                | Protozoa | no  | no  | no  |
| iran | chlamydomydia pneumoniae             | Bacteria | yes | yes | no  |
| iran | arthroderma otae                     | Fungi    | no  | no  | no  |
| iran | streptococcus iniae                  | Bacteria | no  | no  | no  |
| iran | babesia ovis                         | Protozoa | no  | no  | no  |
| iran | dientamoeba fragilis                 | Protozoa | yes | yes | no  |
| iran | trichophyton tonsurans               | Fungi    | yes | yes | no  |
| iran | nosema ceranae                       | Fungi    | no  | no  | no  |
| iran | trichinella britovi                  | Helminth | yes | yes | no  |
| iran | tula virus                           | Virus    | no  | no  | no  |
| iran | marshallagia marshalli               | Helminth | yes | yes | no  |
| iran | alternaria triticina                 | Fungi    | no  | no  | no  |
| iran | human astrovirus                     | Virus    | yes | no  | yes |
| iran | microsporium ferrugineum             | Fungi    | yes | no  | no  |
| iran | entamoeba dispar                     | Protozoa | no  | no  | no  |
| iran | brachybacterium paraconglomeratum    | Bacteria | no  | no  | no  |
| iran | hepatitis delta virus                | Virus    | yes | no  | no  |
| iran | pseudomonas aeruginosa               | Bacteria | yes | yes | yes |
| iran | enterococcus raffinosus              | Bacteria | yes | no  | no  |
| iran | mycobacterium tuberculosis           | Bacteria | yes | yes | yes |
| iran | cryptosporidium parvum               | Protozoa | yes | yes | yes |
| iran | newcastle disease virus              | Virus    | yes | yes | no  |
| iran | encephalitozoon intestinalis         | Fungi    | yes | no  | yes |
| iran | leptospira kirschneri                | Bacteria | yes | yes | no  |
| iran | mycoplasma genitalium                | Bacteria | yes | no  | no  |
| iran | colletotrichum truncatum             | Fungi    | no  | no  | no  |
| iran | enterococcus faecalis                | Bacteria | yes | yes | yes |
| iran | primate t-lymphotropic virus 1       | Virus    | no  | no  | no  |
| iran | plasmodium vivax                     | Protozoa | yes | no  | yes |
| iran | staphylococcus aureus                | Bacteria | yes | yes | yes |
| iran | infectious pancreatic necrosis virus | Virus    | no  | no  | no  |
| iran | hymenolepis nana                     | Helminth | yes | yes | no  |
| iran | alcaligenes faecalis                 | Bacteria | no  | no  | no  |
| iran | aeromonas veronii                    | Bacteria | yes | no  | yes |
| iran | trichophyton schoenleinii            | Fungi    | yes | yes | no  |
| iran | bacillus firmus                      | Bacteria | no  | no  | no  |
| iran | human adenovirus c                   | Virus    | yes | no  | no  |
| iran | hepatitis b virus                    | Virus    | yes | no  | yes |
| iran | brucella melitensis                  | Bacteria | yes | yes | yes |
| iran | achromobacter xylosoxidans           | Bacteria | yes | no  | no  |
| iran | leishmania turanica                  | Protozoa | no  | no  | no  |
| iran | rinderpest virus                     | Virus    | no  | no  | no  |
| iran | bluetongue virus                     | Virus    | no  | no  | no  |
| iran | lewisia infectoria                   | Fungi    | no  | no  | no  |
| iran | cryptosporidium hominis              | Protozoa | yes | no  | yes |

|      |                                  |          |     |     |     |
|------|----------------------------------|----------|-----|-----|-----|
| iran | bacillus cereus                  | Bacteria | yes | yes | no  |
| iran | bk polyomavirus                  | Virus    | no  | no  | no  |
| iran | toxocara canis                   | Helminth | yes | yes | no  |
| iran | bovine viral diarrhea virus 1    | Virus    | no  | no  | no  |
| iran | tsukamurella tyrosinosolvens     | Bacteria | yes | no  | no  |
| iran | peste-des-petits-ruminants virus | Virus    | no  | no  | no  |
| iran | candida tropicalis               | Fungi    | yes | yes | no  |
| iran | leishmania tropica               | Protozoa | yes | yes | no  |
| iran | dicrocoelium dendriticum         | Helminth | yes | yes | no  |
| iran | nocardia cyriacigeorgica         | Bacteria | no  | no  | no  |
| iran | alternaria alternata             | Fungi    | yes | yes | no  |
| iran | bovine leukemia virus            | Virus    | no  | no  | no  |
| iran | leishmania infantum              | Protozoa | yes | yes | yes |
| iran | entamoeba histolytica            | Protozoa | yes | yes | no  |
| iran | bacillus thuringiensis           | Bacteria | yes | no  | no  |
| iran | aerococcus viridans              | Bacteria | yes | no  | no  |
| iran | infectious bursal disease virus  | Virus    | no  | no  | no  |
| iran | pantoea cedenensis               | Bacteria | no  | no  | no  |
| iran | mycoplasma synoviae              | Bacteria | no  | no  | no  |
| iran | shigella flexneri                | Bacteria | yes | yes | no  |
| iran | chalastospora gossypii           | Fungi    | no  | no  | no  |
| iran | lactococcus lactis               | Bacteria | no  | no  | no  |
| iran | aspergillus versicolor           | Fungi    | yes | no  | no  |
| iran | chicken anemia virus             | Virus    | no  | no  | no  |
| iran | bovine herpesvirus 4             | Virus    | no  | no  | no  |
| iran | bacillus pumilus                 | Bacteria | yes | no  | no  |
| iran | clostridium septicum             | Bacteria | yes | yes | no  |
| iran | mycoplasma salivarium            | Bacteria | yes | no  | no  |
| iran | streptococcus dysgalactiae       | Bacteria | no  | no  | no  |
| iran | arthroderma vanbreuseghemii      | Fungi    | no  | no  | no  |
| iran | saccharomyces cerevisiae         | Fungi    | yes | no  | no  |
| iran | listeria monocytogenes           | Bacteria | yes | yes | yes |
| iran | aeromonas eucrenophila           | Bacteria | no  | no  | no  |
| iran | lactobacillus paracasei          | Bacteria | no  | no  | no  |
| iran | bacillus sonorensis              | Bacteria | no  | no  | no  |
| iran | human enterovirus c              | Virus    | yes | no  | no  |
| iran | ancylostoma tubaeforme           | Helminth | no  | no  | no  |
| iran | leishmania major                 | Protozoa | yes | yes | no  |
| iran | trichomonas vaginalis            | Protozoa | yes | no  | yes |
| iran | nematodirella cameli             | Helminth | no  | no  | no  |
| iran | ornithobacterium rhinotracheale  | Bacteria | no  | no  | no  |
| iran | escherichia coli                 | Bacteria | yes | yes | yes |
| iran | arthroderma fulvum               | Fungi    | no  | no  | no  |
| iran | salmonella enterica              | Bacteria | no  | no  | no  |
| iran | orf virus                        | Virus    | yes | yes | no  |
| iran | shigella dysenteriae             | Bacteria | yes | yes | yes |
| iran | gibberella moniliformis          | Fungi    | no  | no  | no  |
| iran | epidermophyton floccosum         | Fungi    | yes | yes | no  |
| iran | plasmodium falciparum            | Protozoa | yes | no  | yes |
| iran | jc polyomavirus                  | Virus    | no  | no  | no  |

|         |                                       |          |     |     |     |
|---------|---------------------------------------|----------|-----|-----|-----|
| iran    | clostridium perfringens               | Bacteria | yes | yes | no  |
| iran    | vibrio cholerae                       | Bacteria | yes | no  | yes |
| iran    | fasciola hepatica                     | Helminth | yes | yes | no  |
| iran    | toxocara cati                         | Helminth | yes | yes | no  |
| iran    | staphylococcus warneri                | Bacteria | yes | yes | no  |
| iran    | acinetobacter baumannii               | Bacteria | yes | no  | no  |
| iran    | rhodococcus erythropolis              | Bacteria | yes | no  | no  |
| iran    | capnocytophaga canimorsus             | Bacteria | yes | yes | no  |
| iran    | hepatitis c virus                     | Virus    | yes | no  | yes |
| iran    | aeromonas media                       | Bacteria | no  | no  | no  |
| iran    | human herpesvirus 8                   | Virus    | yes | no  | yes |
| iran    | camelpox virus                        | Virus    | no  | no  | no  |
| iran    | sarcocystis miescheriana              | Protozoa | no  | no  | no  |
| iran    | streptococcus uberis                  | Bacteria | yes | yes | no  |
| iran    | echinococcus granulosus               | Helminth | yes | yes | yes |
| iran    | crimean-congo hemorrhagic fever virus | Virus    | no  | no  | no  |
| iran    | sandfly fever naples virus            | Virus    | yes | yes | yes |
| iran    | nematodirus oiratianus                | Helminth | no  | no  | no  |
| iran    | neospora caninum                      | Protozoa | no  | no  | no  |
| iran    | bacillus licheniformis                | Bacteria | yes | yes | no  |
| iran    | enterococcus faecium                  | Bacteria | yes | yes | yes |
| iran    | lactobacillus plantarum               | Bacteria | no  | no  | no  |
| iran    | avian coronavirus                     | Virus    | no  | no  | no  |
| iran    | influenza b virus                     | Virus    | yes | yes | no  |
| iran    | toxoplasma gondii                     | Protozoa | yes | yes | yes |
| iran    | pneumocystis carinii                  | Fungi    | yes | yes | yes |
| iran    | coxiella burnetii                     | Bacteria | yes | yes | no  |
| iran    | enterococcus durans                   | Bacteria | yes | yes | no  |
| iraq    | hepatitis b virus                     | Virus    | yes | no  | yes |
| iraq    | paecilomyces lilacinus                | Fungi    | yes | yes | no  |
| iraq    | newcastle disease virus               | Virus    | yes | yes | no  |
| iraq    | aspergillus fumigatus                 | Fungi    | no  | no  | no  |
| iraq    | influenza a virus                     | Virus    | yes | yes | yes |
| iraq    | leishmania donovani                   | Protozoa | yes | yes | yes |
| iraq    | human enterovirus c                   | Virus    | yes | no  | no  |
| iraq    | leishmania major                      | Protozoa | yes | yes | no  |
| iraq    | crimean-congo hemorrhagic fever virus | Virus    | no  | no  | no  |
| iraq    | foot-and-mouth disease virus          | Virus    | no  | no  | no  |
| iraq    | klebsiella pneumoniae                 | Bacteria | yes | yes | yes |
| iraq    | peste-des-petits-ruminants virus      | Virus    | no  | no  | no  |
| iraq    | acinetobacter radioresistens          | Bacteria | yes | no  | no  |
| iraq    | norwalk virus                         | Virus    | yes | no  | yes |
| iraq    | human enterovirus b                   | Virus    | yes | no  | yes |
| iraq    | measles virus                         | Virus    | yes | yes | yes |
| iraq    | avian coronavirus                     | Virus    | no  | no  | no  |
| iraq    | acinetobacter baumannii               | Bacteria | yes | no  | no  |
| iraq    | leishmania tropica                    | Protozoa | yes | yes | no  |
| ireland | measles virus                         | Virus    | yes | yes | yes |
| ireland | feline panleukopenia virus            | Virus    | no  | no  | no  |
| ireland | hepatitis c virus                     | Virus    | yes | no  | yes |



|         |                                      |          |     |     |     |
|---------|--------------------------------------|----------|-----|-----|-----|
| ireland | bk polyomavirus                      | Virus    | no  | no  | no  |
| ireland | salmonella enterica                  | Bacteria | no  | no  | no  |
| ireland | human immunodeficiency virus 2       | Virus    | yes | no  | yes |
| ireland | hepatitis b virus                    | Virus    | yes | no  | yes |
| ireland | human immunodeficiency virus 1       | Virus    | yes | no  | yes |
| ireland | human enterovirus a                  | Virus    | yes | no  | no  |
| ireland | klebsiella oxytoca                   | Bacteria | yes | yes | no  |
| ireland | escherichia coli                     | Bacteria | yes | yes | yes |
| ireland | candida tropicalis                   | Fungi    | yes | yes | no  |
| ireland | clostridium difficile                | Bacteria | yes | yes | yes |
| ireland | candida albicans                     | Fungi    | yes | yes | yes |
| ireland | human herpesvirus 3                  | Virus    | no  | no  | no  |
| ireland | pseudomonas fluorescens              | Bacteria | yes | no  | no  |
| ireland | human enterovirus b                  | Virus    | yes | no  | yes |
| ireland | bovine herpesvirus 4                 | Virus    | no  | no  | no  |
| ireland | norwalk virus                        | Virus    | yes | no  | yes |
| ireland | chlamydia trachomatis                | Bacteria | yes | yes | yes |
| ireland | rotavirus a                          | Virus    | yes | yes | yes |
| ireland | candida dubliniensis                 | Fungi    | yes | no  | no  |
| ireland | aeromonas salmonicida                | Bacteria | no  | no  | no  |
| ireland | salmon pancreas disease virus        | Virus    | no  | no  | no  |
| ireland | bacillus cereus                      | Bacteria | yes | yes | no  |
| ireland | shigella dysenteriae                 | Bacteria | yes | yes | yes |
| ireland | bacillus thuringiensis               | Bacteria | yes | no  | no  |
| ireland | enterococcus faecium                 | Bacteria | yes | yes | yes |
| ireland | human adenovirus b                   | Virus    | yes | no  | no  |
| ireland | arcobacter cryaerophilus             | Bacteria | yes | yes | no  |
| ireland | primate t-lymphotropic virus 2       | Virus    | no  | no  | no  |
| ireland | mumps virus                          | Virus    | yes | no  | no  |
| ireland | aggregatibacter actinomycetemcomita  | Bacteria | no  | no  | no  |
| ireland | fasciola hepatica                    | Helminth | yes | yes | no  |
| ireland | candida parapsilosis                 | Fungi    | yes | yes | no  |
| ireland | babesia divergens                    | Protozoa | yes | yes | no  |
| ireland | bovine adenovirus c                  | Virus    | no  | no  | no  |
| ireland | pomphorhynchus laevis                | Helminth | no  | no  | no  |
| ireland | helicobacter pylori                  | Bacteria | yes | yes | no  |
| ireland | neoparamoeba pemaquidensis           | Protozoa | no  | no  | no  |
| ireland | ochrobactrum anthropi                | Bacteria | yes | no  | no  |
| ireland | newcastle disease virus              | Virus    | yes | yes | no  |
| ireland | foot-and-mouth disease virus         | Virus    | no  | no  | no  |
| ireland | visna/maedi virus                    | Virus    | no  | no  | no  |
| ireland | piscirickettsia salmonis             | Bacteria | no  | no  | no  |
| ireland | infectious pancreatic necrosis virus | Virus    | no  | no  | no  |
| ireland | candida glabrata                     | Fungi    | yes | yes | yes |
| ireland | acinetobacter baumannii              | Bacteria | yes | no  | no  |
| ireland | angiostrongylus vasorum              | Helminth | no  | no  | no  |
| ireland | cryptosporidium parvum               | Protozoa | yes | yes | yes |
| ireland | klebsiella pneumoniae                | Bacteria | yes | yes | yes |
| ireland | influenza a virus                    | Virus    | yes | yes | yes |
| ireland | suid herpesvirus 1                   | Virus    | no  | no  | no  |

|             |                                     |          |     |     |     |
|-------------|-------------------------------------|----------|-----|-----|-----|
| ireland     | staphylococcus aureus               | Bacteria | yes | yes | yes |
| ireland     | debaryomyces hansenii               | Fungi    | no  | no  | no  |
| isle of man | feline calicivirus                  | Virus    | no  | no  | no  |
| israel      | foot-and-mouth disease virus        | Virus    | no  | no  | no  |
| israel      | bacillus thioeparans                | Bacteria | no  | no  | no  |
| israel      | hepatitis b virus                   | Virus    | yes | no  | yes |
| israel      | pepper mild mottle virus            | Virus    | no  | no  | no  |
| israel      | human immunodeficiency virus 2      | Virus    | yes | no  | yes |
| israel      | bacillus thuringiensis              | Bacteria | yes | no  | no  |
| israel      | rhinocladiella mackenziei           | Fungi    | no  | no  | no  |
| israel      | borrelia persica                    | Bacteria | yes | yes | no  |
| israel      | influenza b virus                   | Virus    | yes | yes | no  |
| israel      | burkholderia fungorum               | Bacteria | no  | no  | no  |
| israel      | bluetongue virus                    | Virus    | no  | no  | no  |
| israel      | measles virus                       | Virus    | yes | yes | yes |
| israel      | erwinia persicina                   | Bacteria | no  | no  | no  |
| israel      | lumpy skin disease virus            | Virus    | no  | no  | no  |
| israel      | prosthenhystera obesa               | Helminth | no  | no  | no  |
| israel      | epizootic hemorrhagic disease virus | Virus    | no  | no  | no  |
| israel      | mycobacterium marinum               | Bacteria | yes | yes | yes |
| israel      | agrobacterium tumefaciens           | Bacteria | no  | no  | no  |
| israel      | human herpesvirus 8                 | Virus    | yes | no  | yes |
| israel      | bacillus subtilis                   | Bacteria | yes | yes | no  |
| israel      | pseudomonas stutzeri                | Bacteria | yes | no  | no  |
| israel      | rotavirus a                         | Virus    | yes | yes | yes |
| israel      | spirocerca lupi                     | Helminth | yes | yes | no  |
| israel      | bacillus endophyticus               | Bacteria | no  | no  | no  |
| israel      | leishmania major                    | Protozoa | yes | yes | no  |
| israel      | anaplasma marginale                 | Bacteria | no  | no  | no  |
| israel      | lymphocystis disease virus 1        | Virus    | no  | no  | no  |
| israel      | newcastle disease virus             | Virus    | yes | yes | no  |
| israel      | human enterovirus b                 | Virus    | yes | no  | yes |
| israel      | equine encephalosis virus           | Virus    | no  | no  | no  |
| israel      | pseudomonas synxantha               | Bacteria | no  | no  | no  |
| israel      | pantoea agglomerans                 | Bacteria | yes | yes | no  |
| israel      | aeromonas hydrophila                | Bacteria | yes | yes | yes |
| israel      | colletotrichum truncatum            | Fungi    | no  | no  | no  |
| israel      | anaplasma centrale                  | Bacteria | no  | no  | no  |
| israel      | babesia bigemina                    | Protozoa | no  | no  | no  |
| israel      | rickettsia massiliae                | Bacteria | yes | yes | no  |
| israel      | bacillus megaterium                 | Bacteria | no  | no  | no  |
| israel      | burkholderia cepacia                | Bacteria | yes | no  | no  |
| israel      | acinetobacter lwoffii               | Bacteria | yes | no  | no  |
| israel      | aeromonas aquariorum                | Bacteria | no  | no  | no  |
| israel      | escherichia coli                    | Bacteria | yes | yes | yes |
| israel      | influenza a virus                   | Virus    | yes | yes | yes |
| israel      | bacillus mojavensis                 | Bacteria | no  | no  | no  |
| israel      | avian metapneumovirus               | Virus    | no  | no  | no  |
| israel      | brevibacterium casei                | Bacteria | no  | no  | no  |
| israel      | cyprinid herpesvirus 3              | Virus    | no  | no  | no  |

|        |                                    |          |     |     |     |
|--------|------------------------------------|----------|-----|-----|-----|
| israel | haemoproteus ptyodactylis          | Protozoa | no  | no  | no  |
| israel | rhodococcus erythropolis           | Bacteria | yes | no  | no  |
| israel | staphylococcus warneri             | Bacteria | yes | yes | no  |
| israel | aeromonas salmonicida              | Bacteria | no  | no  | no  |
| israel | corynebacterium pseudotuberculosis | Bacteria | yes | yes | no  |
| israel | neisseria meningitidis             | Bacteria | yes | no  | yes |
| israel | human metapneumovirus              | Virus    | no  | no  | no  |
| israel | human immunodeficiency virus 1     | Virus    | yes | no  | yes |
| israel | human adenovirus b                 | Virus    | yes | no  | no  |
| israel | rabies virus                       | Virus    | yes | yes | yes |
| israel | beak and feather disease virus     | Virus    | no  | no  | no  |
| israel | stenotrophomonas maltophilia       | Bacteria | no  | no  | no  |
| israel | rubella virus                      | Virus    | yes | no  | no  |
| israel | staphylococcus pseudintermedius    | Bacteria | no  | no  | no  |
| israel | aeromonas veronii                  | Bacteria | yes | no  | yes |
| israel | leishmania infantum                | Protozoa | yes | yes | yes |
| israel | yersinia pestis                    | Bacteria | yes | yes | yes |
| israel | infectious bursal disease virus    | Virus    | no  | no  | no  |
| israel | besnoitia besnoiti                 | Protozoa | no  | no  | no  |
| israel | bacillus licheniformis             | Bacteria | yes | yes | no  |
| israel | staphylococcus pasteurii           | Bacteria | no  | no  | no  |
| israel | staphylococcus haemolyticus        | Bacteria | yes | yes | no  |
| israel | human enterovirus c                | Virus    | yes | no  | no  |
| israel | cladosporium cladosporioides       | Fungi    | yes | no  | no  |
| israel | fusarium oxysporum                 | Fungi    | yes | no  | yes |
| israel | staphylococcus epidermidis         | Bacteria | yes | yes | yes |
| israel | cryptosporidium parvum             | Protozoa | yes | yes | yes |
| israel | plasmodium relictum                | Protozoa | no  | no  | no  |
| israel | babesia bovis                      | Protozoa | yes | yes | no  |
| israel | burkholderia cenocepacia           | Bacteria | no  | no  | no  |
| israel | pseudomonas anguilliseptica        | Bacteria | no  | no  | no  |
| israel | campylobacter coli                 | Bacteria | yes | yes | no  |
| israel | avian orthoreovirus                | Virus    | no  | no  | no  |
| israel | fusarium subglutinans              | Fungi    | yes | no  | no  |
| israel | hepatitis e virus                  | Virus    | yes | yes | yes |
| israel | shewanella putrefaciens            | Bacteria | no  | no  | no  |
| israel | human parvovirus b19               | Virus    | no  | no  | no  |
| israel | bacillus infantis                  | Bacteria | no  | no  | no  |
| israel | bacillus amyloliquefaciens         | Bacteria | no  | no  | no  |
| israel | pseudomonas aeruginosa             | Bacteria | yes | yes | yes |
| israel | west nile virus                    | Virus    | yes | yes | yes |
| israel | micrococcus yunnanensis            | Bacteria | no  | no  | no  |
| israel | alternaria alternata               | Fungi    | yes | yes | no  |
| israel | avian coronavirus                  | Virus    | no  | no  | no  |
| italy  | yersinia pseudotuberculosis        | Bacteria | yes | yes | no  |
| italy  | saccharomyces cerevisiae           | Fungi    | yes | no  | no  |
| italy  | enterobacter cloacae               | Bacteria | yes | yes | no  |
| italy  | shigella sonnei                    | Bacteria | yes | yes | no  |
| italy  | stenotrophomonas maltophilia       | Bacteria | no  | no  | no  |
| italy  | pseudomonas fluorescens            | Bacteria | yes | no  | no  |

|       |                                         |          |     |     |     |
|-------|-----------------------------------------|----------|-----|-----|-----|
| italy | <i>candida tropicalis</i>               | Fungi    | yes | yes | no  |
| italy | <i>cordyceps bassiana</i>               | Fungi    | no  | no  | no  |
| italy | <i>nocardiopsis dassonvillei</i>        | Bacteria | no  | no  | no  |
| italy | <i>pantoea agglomerans</i>              | Bacteria | yes | yes | no  |
| italy | human parechovirus                      | Virus    | no  | no  | no  |
| italy | <i>aspergillus carbonarius</i>          | Fungi    | no  | no  | no  |
| italy | bk polyomavirus                         | Virus    | no  | no  | no  |
| italy | <i>bacillus megaterium</i>              | Bacteria | no  | no  | no  |
| italy | avian paramyxovirus 9                   | Virus    | no  | no  | no  |
| italy | <i>helicobacter pylori</i>              | Bacteria | yes | yes | no  |
| italy | pepper mild mottle virus                | Virus    | no  | no  | no  |
| italy | <i>clavospora lusitaniae</i>            | Fungi    | no  | no  | no  |
| italy | rubella virus                           | Virus    | yes | no  | no  |
| italy | <i>theileria annulata</i>               | Protozoa | no  | no  | no  |
| italy | human herpesvirus 4                     | Virus    | no  | no  | no  |
| italy | <i>lysiniibacillus fusiformis</i>       | Bacteria | no  | no  | no  |
| italy | <i>pestalotiopsis microspora</i>        | Fungi    | no  | no  | no  |
| italy | <i>echinococcus canadensis</i>          | Helminth | no  | no  | no  |
| italy | <i>anisakis physeteris</i>              | Helminth | yes | yes | no  |
| italy | hepatitis b virus                       | Virus    | yes | no  | yes |
| italy | mammalian orthoreovirus                 | Virus    | no  | no  | no  |
| italy | hepatitis c virus                       | Virus    | yes | no  | yes |
| italy | <i>rickettsia helvetica</i>             | Bacteria | yes | no  | no  |
| italy | foot-and-mouth disease virus            | Virus    | no  | no  | no  |
| italy | feline panleukopenia virus              | Virus    | no  | no  | no  |
| italy | <i>gibberella intermedia</i>            | Fungi    | no  | no  | no  |
| italy | <i>rhodococcus equi</i>                 | Bacteria | yes | yes | no  |
| italy | <i>brucella melitensis</i>              | Bacteria | yes | yes | yes |
| italy | infectious hematopoietic necrosis virus | Virus    | no  | no  | no  |
| italy | <i>onchocerca volvulus</i>              | Helminth | yes | yes | yes |
| italy | <i>gibberella moniliformis</i>          | Fungi    | no  | no  | no  |
| italy | human enterovirus b                     | Virus    | yes | no  | yes |
| italy | <i>enterobacter asburiae</i>            | Bacteria | yes | yes | no  |
| italy | <i>weissella confusa</i>                | Bacteria | no  | no  | no  |
| italy | feline astrovirus                       | Virus    | no  | no  | no  |
| italy | <i>pseudomonas putida</i>               | Bacteria | yes | no  | no  |
| italy | <i>staphylococcus aureus</i>            | Bacteria | yes | yes | yes |
| italy | <i>acinetobacter baumannii</i>          | Bacteria | yes | no  | no  |
| italy | human coronavirus 229e                  | Virus    | yes | no  | no  |
| italy | jc polyomavirus                         | Virus    | no  | no  | no  |
| italy | <i>haemophilus parasuis</i>             | Bacteria | no  | no  | no  |
| italy | <i>leishmania donovani</i>              | Protozoa | yes | yes | yes |
| italy | <i>anaplasma marginale</i>              | Bacteria | no  | no  | no  |
| italy | acidianus filamentous virus 2           | Virus    | no  | no  | no  |
| italy | <i>batrachochytrium dendrobatidis</i>   | Fungi    | no  | no  | no  |
| italy | west nile virus                         | Virus    | yes | yes | yes |
| italy | <i>burkholderia pseudomallei</i>        | Bacteria | yes | yes | no  |
| italy | <i>candida albicans</i>                 | Fungi    | yes | yes | yes |
| italy | <i>vibrio cholerae</i>                  | Bacteria | yes | no  | yes |
| italy | <i>listeria monocytogenes</i>           | Bacteria | yes | yes | yes |

|       |                                       |          |     |     |     |
|-------|---------------------------------------|----------|-----|-----|-----|
| italy | botryosphaeria dothidea               | Fungi    | no  | no  | no  |
| italy | lactobacillus brevis                  | Bacteria | no  | no  | no  |
| italy | alphacoronavirus 1                    | Virus    | no  | no  | no  |
| italy | caprine herpesvirus 1                 | Virus    | no  | no  | no  |
| italy | erwinia persicina                     | Bacteria | no  | no  | no  |
| italy | contraeaecum rudolphii                | Helminth | no  | no  | no  |
| italy | human papillomavirus 6                | Virus    | no  | no  | no  |
| italy | fusarium incarnatum                   | Fungi    | yes | no  | no  |
| italy | bifidobacterium breve                 | Bacteria | no  | no  | no  |
| italy | vibrio crassostreae                   | Bacteria | no  | no  | no  |
| italy | encephalomyocarditis virus            | Virus    | yes | yes | no  |
| italy | haemoproteus tartakovskyi             | Protozoa | no  | no  | no  |
| italy | mycobacterium celatum                 | Bacteria | yes | no  | no  |
| italy | weissella cibaria                     | Bacteria | no  | no  | no  |
| italy | human metapneumovirus                 | Virus    | no  | no  | no  |
| italy | african swine fever virus             | Virus    | no  | no  | no  |
| italy | enterobacter aerogenes                | Bacteria | yes | yes | no  |
| italy | beak and feather disease virus        | Virus    | no  | no  | no  |
| italy | rotavirus a                           | Virus    | yes | yes | yes |
| italy | achromobacter denitrificans           | Bacteria | no  | no  | no  |
| italy | pseudomonas stutzeri                  | Bacteria | yes | no  | no  |
| italy | avian paramyxovirus 2                 | Virus    | no  | no  | no  |
| italy | severe acute respiratory syndrome-rel | Virus    | no  | no  | no  |
| italy | betacoronavirus 1                     | Virus    | no  | no  | no  |
| italy | trichophyton rubrum                   | Fungi    | yes | yes | no  |
| italy | amphibiocystidium ranae               | Others   | no  | no  | no  |
| italy | streptococcus agalactiae              | Bacteria | yes | yes | no  |
| italy | legionella anisa                      | Bacteria | yes | no  | no  |
| italy | porcine sapelovirus                   | Virus    | no  | no  | no  |
| italy | candida inconspicua                   | Fungi    | no  | no  | no  |
| italy | tick-borne encephalitis virus         | Virus    | no  | no  | no  |
| italy | campylobacter jejuni                  | Bacteria | yes | yes | yes |
| italy | human herpesvirus 5                   | Virus    | yes | no  | yes |
| italy | lactobacillus mucosae                 | Bacteria | no  | no  | no  |
| italy | baylisascaris schroederi              | Helminth | no  | no  | no  |
| italy | bacillus subtilis                     | Bacteria | yes | yes | no  |
| italy | toxoplasma gondii                     | Protozoa | yes | yes | yes |
| italy | enterococcus durans                   | Bacteria | yes | yes | no  |
| italy | human adenovirus c                    | Virus    | yes | no  | no  |
| italy | burkholderia gladioli                 | Bacteria | no  | no  | no  |
| italy | bacillus pumilus                      | Bacteria | yes | no  | no  |
| italy | lactobacillus crispatus               | Bacteria | no  | no  | no  |
| italy | clinostomum complanatum               | Helminth | no  | no  | no  |
| italy | tatlockia micdadei                    | Bacteria | yes | no  | no  |
| italy | clostridium sordellii                 | Bacteria | yes | yes | no  |
| italy | campylobacter coli                    | Bacteria | yes | yes | no  |
| italy | enterococcus casseliflavus            | Bacteria | yes | no  | no  |
| italy | pseudomonas poae                      | Bacteria | no  | no  | no  |
| italy | newcastle disease virus               | Virus    | yes | yes | no  |
| italy | staphylococcus saprophyticus          | Bacteria | yes | no  | no  |

|       |                                     |          |     |     |     |
|-------|-------------------------------------|----------|-----|-----|-----|
| italy | setaria labiatopapillosa            | Helminth | no  | no  | no  |
| italy | photobacterium damsela              | Bacteria | yes | yes | no  |
| italy | clostridium botulinum               | Bacteria | yes | yes | yes |
| italy | nematodirus davtiani                | Helminth | no  | no  | no  |
| italy | streptococcus pneumoniae            | Bacteria | yes | yes | yes |
| italy | borrelia burgdorferi                | Bacteria | yes | yes | yes |
| italy | lactobacillus plantarum             | Bacteria | no  | no  | no  |
| italy | babesia canis                       | Protozoa | no  | no  | no  |
| italy | microbacterium trichothecenolyticum | Bacteria | no  | no  | no  |
| italy | arthroderma otae                    | Fungi    | no  | no  | no  |
| italy | human enterovirus d                 | Virus    | yes | no  | no  |
| italy | sapporo virus                       | Virus    | no  | no  | no  |
| italy | orf virus                           | Virus    | yes | yes | no  |
| italy | bovine viral diarrhea virus 2       | Virus    | no  | no  | no  |
| italy | bovine torovirus                    | Virus    | no  | no  | no  |
| italy | baylisascaris transfuga             | Helminth | no  | no  | no  |
| italy | calicophoron daubneyi               | Helminth | no  | no  | no  |
| italy | clostridium sporogenes              | Bacteria | yes | yes | no  |
| italy | lactobacillus ultunensis            | Bacteria | no  | no  | no  |
| italy | proteus penneri                     | Bacteria | yes | yes | no  |
| italy | mycoplasma haemocanis               | Bacteria | no  | no  | no  |
| italy | lactobacillus sakei                 | Bacteria | no  | no  | no  |
| italy | dicrocoelium hospes                 | Helminth | yes | yes | no  |
| italy | catenotaenia henttoneni             | Helminth | no  | no  | no  |
| italy | babesia gibsoni                     | Protozoa | yes | yes | no  |
| italy | human enterovirus a                 | Virus    | yes | no  | no  |
| italy | classical swine fever virus         | Virus    | no  | no  | no  |
| italy | bacillus clausii                    | Bacteria | no  | no  | no  |
| italy | cystoisospora suis                  | Protozoa | no  | no  | no  |
| italy | cupriavidus taiwanensis             | Bacteria | no  | no  | no  |
| italy | achromobacter xylosoxidans          | Bacteria | yes | no  | no  |
| italy | rickettsia conorii                  | Bacteria | yes | yes | no  |
| italy | neospora caninum                    | Protozoa | no  | no  | no  |
| italy | arthroderma gypseum                 | Fungi    | no  | no  | no  |
| italy | rhodotorula mucilaginosa            | Fungi    | yes | yes | no  |
| italy | lactobacillus parabuchneri          | Bacteria | no  | no  | no  |
| italy | ochrobactrum anthropi               | Bacteria | yes | no  | no  |
| italy | acinetobacter radioresistens        | Bacteria | yes | no  | no  |
| italy | bacillus anthracis                  | Bacteria | yes | yes | yes |
| italy | haemonchus contortus                | Helminth | yes | yes | no  |
| italy | morganella morganii                 | Bacteria | yes | yes | no  |
| italy | bacillus coagulans                  | Bacteria | yes | yes | no  |
| italy | pseudomonas alcaligenes             | Bacteria | yes | no  | no  |
| italy | jaagsiekte sheep retrovirus         | Virus    | no  | no  | no  |
| italy | clostridium chauvoei                | Bacteria | yes | yes | no  |
| italy | aspergillus tamarii                 | Fungi    | no  | no  | no  |
| italy | plasmodium falciparum               | Protozoa | yes | no  | yes |
| italy | hepatozoon canis                    | Protozoa | no  | no  | no  |
| italy | providencia rettgeri                | Bacteria | yes | yes | no  |
| italy | debaryomyces subglobosus            | Fungi    | no  | no  | no  |

|       |                                        |          |     |     |     |
|-------|----------------------------------------|----------|-----|-----|-----|
| italy | nematodirus rupicaprae                 | Helminth | no  | no  | no  |
| italy | chlamydia suis                         | Bacteria | no  | no  | no  |
| italy | variovorax paradoxus                   | Bacteria | no  | no  | no  |
| italy | citrobacter freundii                   | Bacteria | yes | yes | no  |
| italy | bacillus firmus                        | Bacteria | no  | no  | no  |
| italy | giardia intestinalis                   | Protozoa | no  | no  | no  |
| italy | borrelia afzelii                       | Bacteria | no  | no  | no  |
| italy | pseudomonas plecoglossicida            | Bacteria | no  | no  | no  |
| italy | brucella abortus                       | Bacteria | yes | yes | no  |
| italy | neisseria meningitidis                 | Bacteria | yes | no  | yes |
| italy | burkholderia fungorum                  | Bacteria | no  | no  | no  |
| italy | norwalk virus                          | Virus    | yes | no  | yes |
| italy | cryptosporidium canis                  | Protozoa | no  | no  | no  |
| italy | porcine reproductive and respiratory s | Virus    | no  | no  | no  |
| italy | lactococcus garvieae                   | Bacteria | no  | no  | no  |
| italy | dengue virus                           | Virus    | no  | no  | no  |
| italy | simian foamy virus                     | Virus    | no  | no  | no  |
| italy | canine minute virus                    | Virus    | no  | no  | no  |
| italy | aspergillus tubingensis                | Fungi    | no  | no  | no  |
| italy | legionella pneumophila                 | Bacteria | yes | no  | yes |
| italy | borrelia valaisiana                    | Bacteria | no  | no  | no  |
| italy | sarcocystis neurona                    | Protozoa | no  | no  | no  |
| italy | ehrlichia canis                        | Bacteria | no  | no  | no  |
| italy | chlamydophila felis                    | Bacteria | no  | no  | no  |
| italy | bluetongue virus                       | Virus    | no  | no  | no  |
| italy | avibacterium volantium                 | Bacteria | no  | no  | no  |
| italy | human papillomavirus 16                | Virus    | no  | no  | no  |
| italy | glypthelmins pennsylvaniensis          | Helminth | no  | no  | no  |
| italy | trichinella pseudospiralis             | Helminth | yes | yes | no  |
| italy | mycobacterium tuberculosis             | Bacteria | yes | yes | yes |
| italy | aureobasidium pullulans                | Fungi    | yes | no  | no  |
| italy | human papillomavirus 5                 | Virus    | no  | no  | no  |
| italy | wickerhamomyces anomalus               | Fungi    | no  | no  | no  |
| italy | enterococcus faecium                   | Bacteria | yes | yes | yes |
| italy | meyerozyma guilliermondii              | Fungi    | no  | no  | no  |
| italy | human papillomavirus 53                | Virus    | no  | no  | no  |
| italy | measles virus                          | Virus    | yes | yes | yes |
| italy | borrelia lusitaniae                    | Bacteria | no  | no  | no  |
| italy | neisseria gonorrhoeae                  | Bacteria | yes | no  | yes |
| italy | enterococcus faecalis                  | Bacteria | yes | yes | yes |
| italy | bovine herpesvirus 4                   | Virus    | no  | no  | no  |
| italy | rhodococcus erythropolis               | Bacteria | yes | no  | no  |
| italy | arthrographis kalrae                   | Fungi    | no  | no  | no  |
| italy | infectious pancreatic necrosis virus   | Virus    | no  | no  | no  |
| italy | strongyloides fuelleborni              | Helminth | yes | yes | no  |
| italy | rickettsia monacensis                  | Bacteria | yes | no  | no  |
| italy | mycoplasma agalactiae                  | Bacteria | no  | no  | no  |
| italy | porcine torovirus                      | Virus    | no  | no  | no  |
| italy | nematodirus oiratianus                 | Helminth | no  | no  | no  |
| italy | leuconostoc fallax                     | Bacteria | no  | no  | no  |

|       |                                      |          |     |     |     |
|-------|--------------------------------------|----------|-----|-----|-----|
| italy | clostridium difficile                | Bacteria | yes | yes | yes |
| italy | candida humilis                      | Fungi    | no  | no  | no  |
| italy | california encephalitis virus        | Virus    | yes | yes | yes |
| italy | human immunodeficiency virus 2       | Virus    | yes | no  | yes |
| italy | fascioloides magna                   | Helminth | no  | no  | no  |
| italy | human papillomavirus 61              | Virus    | no  | no  | no  |
| italy | fusarium solani                      | Fungi    | yes | yes | yes |
| italy | neoscytalidium dimidiatum            | Fungi    | no  | no  | no  |
| italy | citrobacter koseri                   | Bacteria | yes | yes | no  |
| italy | burkholderia cepacia                 | Bacteria | yes | no  | no  |
| italy | feline calicivirus                   | Virus    | no  | no  | no  |
| italy | bacillus altitudinis                 | Bacteria | no  | no  | no  |
| italy | human adenovirus b                   | Virus    | yes | no  | no  |
| italy | chikungunya virus                    | Virus    | yes | yes | yes |
| italy | proteus vulgaris                     | Bacteria | yes | yes | no  |
| italy | influenza a virus                    | Virus    | yes | yes | yes |
| italy | caprine arthritis encephalitis virus | Virus    | no  | no  | no  |
| italy | hepatitis e virus                    | Virus    | yes | yes | yes |
| italy | pseudomonas monteilii                | Bacteria | no  | no  | no  |
| italy | gallid herpesvirus 1                 | Virus    | no  | no  | no  |
| italy | pomphorhynchus laevis                | Helminth | no  | no  | no  |
| italy | sporothrix schenckii                 | Fungi    | yes | yes | no  |
| italy | bovine viral diarrhea virus 1        | Virus    | no  | no  | no  |
| italy | lactococcus lactis                   | Bacteria | no  | no  | no  |
| italy | pseudocowpox virus                   | Virus    | yes | yes | no  |
| italy | chryseobacterium indologenes         | Bacteria | no  | no  | no  |
| italy | haemophilus influenzae               | Bacteria | yes | no  | yes |
| italy | burkholderia anthina                 | Bacteria | no  | no  | no  |
| italy | usutu virus                          | Virus    | yes | yes | no  |
| italy | bacillus licheniformis               | Bacteria | yes | yes | no  |
| italy | cryptococcus neoformans              | Fungi    | yes | yes | yes |
| italy | feline immunodeficiency virus        | Virus    | no  | no  | no  |
| italy | klebsiella pneumoniae                | Bacteria | yes | yes | yes |
| italy | cryptococcus gattii                  | Fungi    | no  | no  | no  |
| italy | bacillus mycoides                    | Bacteria | yes | no  | no  |
| italy | clostridium tertium                  | Bacteria | yes | yes | no  |
| italy | anaplasma platys                     | Bacteria | no  | no  | no  |
| italy | pediococcus pentosaceus              | Bacteria | no  | no  | no  |
| italy | plectosphaerella cucumerina          | Fungi    | no  | no  | no  |
| italy | rickettsia slovaca                   | Bacteria | yes | yes | no  |
| italy | xanthomonas campestris               | Bacteria | no  | no  | no  |
| italy | acidianus two-tailed virus           | Virus    | no  | no  | no  |
| italy | dirofilaria repens                   | Helminth | yes | yes | no  |
| italy | oceanobacillus oncorhynchi           | Bacteria | no  | no  | no  |
| italy | yersinia enterocolitica              | Bacteria | yes | yes | yes |
| italy | lactobacillus reuteri                | Bacteria | no  | no  | no  |
| italy | porcine type-c oncovirus             | Virus    | no  | no  | no  |
| italy | cowpox virus                         | Virus    | yes | yes | no  |
| italy | neocosmospora vasinfecta             | Fungi    | yes | no  | no  |
| italy | pediococcus acidilactici             | Bacteria | no  | no  | no  |



|       |                                    |          |     |     |     |
|-------|------------------------------------|----------|-----|-----|-----|
| italy | janthinobacterium lividum          | Bacteria | no  | no  | no  |
| italy | trichinella britovi                | Helminth | yes | yes | no  |
| italy | escherichia coli                   | Bacteria | yes | yes | yes |
| italy | taenia martis                      | Helminth | no  | no  | no  |
| italy | simian virus 40                    | Virus    | no  | no  | no  |
| italy | staphylococcus xylosus             | Bacteria | no  | no  | no  |
| italy | cryptosporidium hominis            | Protozoa | yes | no  | yes |
| italy | aspergillus niger                  | Fungi    | yes | yes | no  |
| italy | alternaria alternata               | Fungi    | yes | yes | no  |
| italy | sporothrix brasiliensis            | Fungi    | no  | no  | no  |
| italy | primate t-lymphotropic virus 2     | Virus    | no  | no  | no  |
| italy | human immunodeficiency virus 1     | Virus    | yes | no  | yes |
| italy | rickettsia massiliae               | Bacteria | yes | yes | no  |
| italy | anisakis pegreffii                 | Helminth | no  | no  | no  |
| italy | porcine teschovirus                | Virus    | no  | no  | no  |
| italy | human respiratory syncytial virus  | Virus    | yes | no  | no  |
| italy | corynebacterium pseudotuberculosis | Bacteria | yes | yes | no  |
| italy | human enterovirus c                | Virus    | yes | no  | no  |
| italy | echinococcus granulosus            | Helminth | yes | yes | yes |
| italy | leishmania infantum                | Protozoa | yes | yes | yes |
| italy | influenza b virus                  | Virus    | yes | yes | no  |
| italy | epidermophyton floccosum           | Fungi    | yes | yes | no  |
| italy | cryptosporidium parvum             | Protozoa | yes | yes | yes |
| italy | human herpesvirus 8                | Virus    | yes | no  | yes |
| italy | salmonella enterica                | Bacteria | no  | no  | no  |
| italy | canine distemper virus             | Virus    | no  | no  | no  |
| italy | alcaligenes faecalis               | Bacteria | no  | no  | no  |
| italy | fusarium oxysporum                 | Fungi    | yes | no  | yes |
| italy | staphylococcus epidermidis         | Bacteria | yes | yes | yes |
| italy | plasmodium vivax                   | Protozoa | yes | no  | yes |
| italy | lactobacillus fermentum            | Bacteria | no  | no  | no  |
| italy | enterococcus italicus              | Bacteria | no  | no  | no  |
| italy | avian coronavirus                  | Virus    | no  | no  | no  |
| italy | proteus mirabilis                  | Bacteria | yes | yes | no  |
| italy | hepatitis delta virus              | Virus    | yes | no  | no  |
| italy | lactobacillus gasseri              | Bacteria | no  | no  | no  |
| italy | human astrovirus                   | Virus    | yes | no  | yes |
| italy | delftia acidovorans                | Bacteria | yes | no  | no  |
| italy | streptococcus pyogenes             | Bacteria | yes | yes | yes |
| italy | lactobacillus paracasei            | Bacteria | no  | no  | no  |
| italy | pseudomonas aeruginosa             | Bacteria | yes | yes | yes |
| italy | heligmosomoides polygyrus          | Helminth | no  | no  | no  |
| italy | bacillus aquimaris                 | Bacteria | no  | no  | no  |
| italy | babesia bovis                      | Protozoa | yes | yes | no  |
| italy | providencia stuartii               | Bacteria | yes | yes | no  |
| italy | taenia multiceps                   | Helminth | yes | no  | no  |
| italy | porcine enterovirus b              | Virus    | no  | no  | no  |
| italy | bacillus amyloliquefaciens         | Bacteria | no  | no  | no  |
| italy | clostridium septicum               | Bacteria | yes | yes | no  |
| italy | clostridium perfringens            | Bacteria | yes | yes | no  |

|             |                                  |          |     |     |     |
|-------------|----------------------------------|----------|-----|-----|-----|
| italy       | bifidobacterium longum           | Bacteria | no  | no  | no  |
| italy       | anaplasma phagocytophilum        | Bacteria | no  | no  | no  |
| italy       | thelazia callipaeda              | Helminth | yes | yes | no  |
| italy       | hepatitis a virus                | Virus    | yes | yes | yes |
| italy       | dirofilaria immitis              | Helminth | yes | yes | no  |
| italy       | trichophyton mentagrophytes      | Fungi    | yes | yes | no  |
| italy       | bacillus cereus                  | Bacteria | yes | yes | no  |
| italy       | fusarium napiforme               | Fungi    | yes | no  | no  |
| italy       | clostridium innocuum             | Bacteria | no  | no  | no  |
| italy       | borrelia garinii                 | Bacteria | no  | no  | no  |
| italy       | setaria tundra                   | Helminth | no  | no  | no  |
| italy       | turkey astrovirus                | Virus    | no  | no  | no  |
| italy       | human papillomavirus 9           | Virus    | no  | no  | no  |
| italy       | pseudomonas pseudoalcaligenes    | Bacteria | yes | no  | no  |
| italy       | sandfly fever naples virus       | Virus    | yes | yes | yes |
| ivory coast | foot-and-mouth disease virus     | Virus    | no  | no  | no  |
| ivory coast | trypanosoma brucei               | Protozoa | yes | yes | yes |
| ivory coast | polystoma occipitalis            | Helminth | no  | no  | no  |
| ivory coast | primate t-lymphotropic virus 1   | Virus    | no  | no  | no  |
| ivory coast | cordyceps bassiana               | Fungi    | no  | no  | no  |
| ivory coast | hepatitis b virus                | Virus    | yes | no  | yes |
| ivory coast | human enterovirus c              | Virus    | yes | no  | no  |
| ivory coast | polystoma baeri                  | Helminth | no  | no  | no  |
| ivory coast | fusarium oxysporum               | Fungi    | yes | no  | yes |
| ivory coast | rotavirus a                      | Virus    | yes | yes | yes |
| ivory coast | saccharomyces cerevisiae         | Fungi    | yes | no  | no  |
| ivory coast | gibberella moniliformis          | Fungi    | no  | no  | no  |
| ivory coast | simian foamy virus               | Virus    | no  | no  | no  |
| ivory coast | staphylococcus aureus            | Bacteria | yes | yes | yes |
| ivory coast | human immunodeficiency virus 2   | Virus    | yes | no  | yes |
| ivory coast | plasmodium malariae              | Protozoa | yes | yes | no  |
| ivory coast | influenza a virus                | Virus    | yes | yes | yes |
| ivory coast | human immunodeficiency virus 1   | Virus    | yes | no  | yes |
| ivory coast | african swine fever virus        | Virus    | no  | no  | no  |
| ivory coast | hepatitis delta virus            | Virus    | yes | no  | no  |
| ivory coast | plasmodium ovale                 | Protozoa | yes | no  | no  |
| ivory coast | yellow fever virus               | Virus    | yes | yes | yes |
| ivory coast | rabies virus                     | Virus    | yes | yes | yes |
| ivory coast | gibberella intermedia            | Fungi    | no  | no  | no  |
| ivory coast | dengue virus                     | Virus    | no  | no  | no  |
| ivory coast | pseudallescheria boydii          | Fungi    | no  | no  | no  |
| ivory coast | peste-des-petits-ruminants virus | Virus    | no  | no  | no  |
| ivory coast | measles virus                    | Virus    | yes | yes | yes |
| ivory coast | simian immunodeficiency virus    | Virus    | no  | no  | no  |
| ivory coast | bacillus cereus                  | Bacteria | yes | yes | no  |
| ivory coast | microsporium audouinii           | Fungi    | yes | yes | no  |
| ivory coast | plasmodium gaboni                | Protozoa | no  | no  | no  |
| ivory coast | plasmodium reichenowi            | Protozoa | no  | no  | no  |
| ivory coast | plasmodium falciparum            | Protozoa | yes | no  | yes |
| ivory coast | trypanosoma avium                | Protozoa | no  | no  | no  |

|             |                                      |          |     |     |     |
|-------------|--------------------------------------|----------|-----|-----|-----|
| ivory coast | <i>pasteurella multocida</i>         | Bacteria | yes | yes | no  |
| jamaica     | <i>chaetomium globosum</i>           | Fungi    | yes | no  | no  |
| jamaica     | <i>preptetos trulla</i>              | Helminth | no  | no  | no  |
| jamaica     | primate t-lymphotropic virus 1       | Virus    | no  | no  | no  |
| jamaica     | human enterovirus b                  | Virus    | yes | no  | yes |
| jamaica     | dengue virus                         | Virus    | no  | no  | no  |
| jamaica     | <i>cryptosporidium parvum</i>        | Protozoa | yes | yes | yes |
| jamaica     | <i>dinurus longisinus</i>            | Helminth | no  | no  | no  |
| jamaica     | <i>trichuris trichiura</i>           | Helminth | yes | yes | no  |
| jamaica     | human herpesvirus 2                  | Virus    | no  | no  | no  |
| jamaica     | <i>xanthomonas campestris</i>        | Bacteria | no  | no  | no  |
| jamaica     | <i>cryptosporidium hominis</i>       | Protozoa | yes | no  | yes |
| jamaica     | <i>schizophyllum commune</i>         | Fungi    | yes | no  | no  |
| jamaica     | human immunodeficiency virus 2       | Virus    | yes | no  | yes |
| jamaica     | human immunodeficiency virus 1       | Virus    | yes | no  | yes |
| jamaica     | bluetongue virus                     | Virus    | no  | no  | no  |
| japan       | <i>saccharomyces cerevisiae</i>      | Fungi    | yes | no  | no  |
| japan       | <i>prevotella dentalis</i>           | Bacteria | yes | no  | no  |
| japan       | <i>trichophyton tonsurans</i>        | Fungi    | yes | yes | no  |
| japan       | <i>heterobothrium okamotoi</i>       | Helminth | no  | no  | no  |
| japan       | ross river virus                     | Virus    | yes | yes | yes |
| japan       | <i>cryptosporidium meleagridis</i>   | Protozoa | no  | no  | no  |
| japan       | <i>ophiostoma stenoceras</i>         | Fungi    | no  | no  | no  |
| japan       | <i>bacillus circulans</i>            | Bacteria | yes | no  | no  |
| japan       | <i>enterococcus mundtii</i>          | Bacteria | yes | no  | no  |
| japan       | <i>lactococcus raffinolactis</i>     | Bacteria | no  | no  | no  |
| japan       | human herpesvirus 4                  | Virus    | no  | no  | no  |
| japan       | <i>pseudomonas oryzihabitans</i>     | Bacteria | no  | no  | no  |
| japan       | <i>arthroderma simii</i>             | Fungi    | no  | no  | no  |
| japan       | <i>strongyloides stercoralis</i>     | Helminth | yes | yes | yes |
| japan       | <i>pseudoalteromonas tetraodonis</i> | Bacteria | no  | no  | no  |
| japan       | <i>vibrio vulnificus</i>             | Bacteria | yes | yes | yes |
| japan       | rubella virus                        | Virus    | yes | no  | no  |
| japan       | <i>brevundimonas diminuta</i>        | Bacteria | yes | no  | no  |
| japan       | <i>pantoea agglomerans</i>           | Bacteria | yes | yes | no  |
| japan       | <i>toxocara canis</i>                | Helminth | yes | yes | no  |
| japan       | <i>heterosporis anguillarum</i>      | Fungi    | no  | no  | no  |
| japan       | bk polyomavirus                      | Virus    | no  | no  | no  |
| japan       | <i>streptococcus pneumoniae</i>      | Bacteria | yes | yes | yes |
| japan       | <i>lactobacillus sakei</i>           | Bacteria | no  | no  | no  |
| japan       | <i>mansonella perforata</i>          | Helminth | no  | no  | no  |
| japan       | <i>shigella sonnei</i>               | Bacteria | yes | yes | no  |
| japan       | <i>neoscytalidium dimidiatum</i>     | Fungi    | no  | no  | no  |
| japan       | torque teno sus virus 2              | Virus    | no  | no  | no  |
| japan       | <i>pseudodactylogyrus haze</i>       | Helminth | no  | no  | no  |
| japan       | <i>bacillus megaterium</i>           | Bacteria | no  | no  | no  |
| japan       | <i>trichuris trichiura</i>           | Helminth | yes | yes | no  |
| japan       | <i>corynebacterium mastitidis</i>    | Bacteria | no  | no  | no  |
| japan       | <i>campylobacter lanienae</i>        | Bacteria | no  | no  | no  |
| japan       | vesicular exanthema of swine virus   | Virus    | no  | no  | no  |

|       |                                       |          |     |     |     |
|-------|---------------------------------------|----------|-----|-----|-----|
| japan | <i>borrelia valaisiana</i>            | Bacteria | no  | no  | no  |
| japan | <i>mucor circinelloides</i>           | Fungi    | yes | yes | no  |
| japan | <i>lactobacillus gasseri</i>          | Bacteria | no  | no  | no  |
| japan | human herpesvirus 1                   | Virus    | no  | no  | no  |
| japan | <i>megasphaera elsdenii</i>           | Bacteria | no  | no  | no  |
| japan | <i>epicoccum nigrum</i>               | Fungi    | no  | no  | no  |
| japan | <i>borrelia afzelii</i>               | Bacteria | no  | no  | no  |
| japan | <i>ehrlichia canis</i>                | Bacteria | no  | no  | no  |
| japan | <i>enterovibrio norvegicus</i>        | Bacteria | no  | no  | no  |
| japan | <i>colletotrichum dematium</i>        | Fungi    | yes | no  | no  |
| japan | <i>trichinella nativa</i>             | Helminth | yes | yes | no  |
| japan | <i>agrobacterium tumefaciens</i>      | Bacteria | no  | no  | no  |
| japan | <i>pseudallescheria boydii</i>        | Fungi    | no  | no  | no  |
| japan | <i>proteocephalus tetrastomus</i>     | Helminth | no  | no  | no  |
| japan | <i>anisakis ziphidarum</i>            | Helminth | no  | no  | no  |
| japan | <i>trypanosoma theileri</i>           | Protozoa | no  | no  | no  |
| japan | <i>pseudomonas stutzeri</i>           | Bacteria | yes | no  | no  |
| japan | <i>fonsecaea monophora</i>            | Fungi    | no  | no  | no  |
| japan | <i>gyrodactylus nipponensis</i>       | Helminth | no  | no  | no  |
| japan | <i>batrachochytrium dendrobatidis</i> | Fungi    | no  | no  | no  |
| japan | <i>sphingomonas melonis</i>           | Bacteria | no  | no  | no  |
| japan | bovine leukemia virus                 | Virus    | no  | no  | no  |
| japan | <i>scolecobasidium humicola</i>       | Fungi    | yes | yes | no  |
| japan | <i>phanerochaete sordida</i>          | Fungi    | no  | no  | no  |
| japan | <i>vibrio alginolyticus</i>           | Bacteria | yes | yes | no  |
| japan | <i>bacillus thuringiensis</i>         | Bacteria | yes | no  | no  |
| japan | <i>legionella longbeachae</i>         | Bacteria | yes | no  | no  |
| japan | <i>listonella anguillarum</i>         | Bacteria | no  | no  | no  |
| japan | <i>thelazia callipaeda</i>            | Helminth | yes | yes | no  |
| japan | psittacid herpesvirus 1               | Virus    | no  | no  | no  |
| japan | <i>botryosphaeria dothidea</i>        | Fungi    | no  | no  | no  |
| japan | <i>candida albicans</i>               | Fungi    | yes | yes | yes |
| japan | bovine torovirus                      | Virus    | no  | no  | no  |
| japan | <i>spirometra erinaceieuropaei</i>    | Helminth | no  | no  | no  |
| japan | <i>prevotella brevis</i>              | Bacteria | no  | no  | no  |
| japan | human enterovirus c                   | Virus    | yes | no  | no  |
| japan | <i>candida palmiroleophila</i>        | Fungi    | no  | no  | no  |
| japan | <i>trichinella britovi</i>            | Helminth | yes | yes | no  |
| japan | <i>weissella cibaria</i>              | Bacteria | no  | no  | no  |
| japan | <i>candida glabrata</i>               | Fungi    | yes | yes | yes |
| japan | <i>staphylococcus aureus</i>          | Bacteria | yes | yes | yes |
| japan | <i>rhodococcus equi</i>               | Bacteria | yes | yes | no  |
| japan | torque teno sus virus 1               | Virus    | no  | no  | no  |
| japan | <i>vibrio fluvialis</i>               | Bacteria | yes | yes | no  |
| japan | <i>corynebacterium amycolatum</i>     | Bacteria | yes | no  | yes |
| japan | <i>aeromonas veronii</i>              | Bacteria | yes | no  | yes |
| japan | <i>carnobacterium maltaromaticum</i>  | Bacteria | no  | no  | no  |
| japan | bovine viral diarrhea virus 2         | Virus    | no  | no  | no  |
| japan | influenza a virus                     | Virus    | yes | yes | yes |
| japan | <i>babesia microti</i>                | Protozoa | yes | yes | yes |

|       |                                        |          |     |     |     |
|-------|----------------------------------------|----------|-----|-----|-----|
| japan | streptobacillus moniliformis           | Bacteria | yes | yes | no  |
| japan | achromobacter xylosoxidans             | Bacteria | yes | no  | no  |
| japan | japanese encephalitis virus            | Virus    | yes | yes | yes |
| japan | lactobacillus rhamnosus                | Bacteria | no  | no  | no  |
| japan | babesia ovata                          | Protozoa | no  | no  | no  |
| japan | actinomyces graevenitzii               | Bacteria | no  | no  | no  |
| japan | blepharocorys uncinata                 | Protozoa | no  | no  | no  |
| japan | burkholderia endofungorum              | Bacteria | no  | no  | no  |
| japan | bacillus mycoides                      | Bacteria | yes | no  | no  |
| japan | pseudomonas xanthomarina               | Bacteria | no  | no  | no  |
| japan | legionella pneumophila                 | Bacteria | yes | no  | yes |
| japan | burkholderia cenocepacia               | Bacteria | no  | no  | no  |
| japan | corynebacterium macginleyi             | Bacteria | yes | no  | no  |
| japan | anaerostipes caccae                    | Bacteria | no  | no  | no  |
| japan | aspergillus fumigatus                  | Fungi    | no  | no  | no  |
| japan | feline calicivirus                     | Virus    | no  | no  | no  |
| japan | cryptosporidium parvum                 | Protozoa | yes | yes | yes |
| japan | conchiformibius kuhniae                | Bacteria | no  | no  | no  |
| japan | rhodococcus rhodochrous                | Bacteria | yes | no  | no  |
| japan | rhodotorula minuta                     | Fungi    | yes | no  | no  |
| japan | strongyloides fuelleborni              | Helminth | yes | yes | no  |
| japan | micrococcus luteus                     | Bacteria | no  | no  | no  |
| japan | eimeria gruis                          | Protozoa | no  | no  | no  |
| japan | salmonella enterica                    | Bacteria | no  | no  | no  |
| japan | trichophyton violaceum                 | Fungi    | yes | yes | no  |
| japan | torque teno virus 10                   | Virus    | no  | no  | no  |
| japan | arachniotus littoralis                 | Fungi    | no  | no  | no  |
| japan | proteocephalus midoriensis             | Helminth | no  | no  | no  |
| japan | chlamydophila abortus                  | Bacteria | no  | no  | no  |
| japan | porcine reproductive and respiratory s | Virus    | no  | no  | no  |
| japan | syphacia frederici                     | Helminth | no  | no  | no  |
| japan | bovine kobuvirus                       | Virus    | no  | no  | no  |
| japan | human herpesvirus 8                    | Virus    | yes | no  | yes |
| japan | bovine viral diarrhea virus 1          | Virus    | no  | no  | no  |
| japan | tsukamurella tyrosinosolvens           | Bacteria | yes | no  | no  |
| japan | streptococcus pluranimalium            | Bacteria | no  | no  | no  |
| japan | photobacterium phosphoreum             | Bacteria | no  | no  | no  |
| japan | eimeria zuernii                        | Protozoa | no  | no  | no  |
| japan | mycobacterium kumamotonense            | Bacteria | no  | no  | no  |
| japan | concinnum ten                          | Helminth | no  | no  | no  |
| japan | foot-and-mouth disease virus           | Virus    | no  | no  | no  |
| japan | bordetella pertussis                   | Bacteria | yes | no  | yes |
| japan | avian paramyxovirus 5                  | Virus    | no  | no  | no  |
| japan | naegleria australiensis                | Protozoa | no  | no  | no  |
| japan | cryptosporidium andersoni              | Protozoa | no  | no  | no  |
| japan | paragonimus westermani                 | Helminth | yes | yes | no  |
| japan | chlamydophila psittaci                 | Bacteria | yes | yes | no  |
| japan | human coronavirus nl63                 | Virus    | no  | no  | no  |
| japan | staphylococcus xylosus                 | Bacteria | no  | no  | no  |
| japan | neisseria gonorrhoeae                  | Bacteria | yes | no  | yes |

|       |                                         |          |     |     |     |
|-------|-----------------------------------------|----------|-----|-----|-----|
| japan | tick-borne encephalitis virus           | Virus    | no  | no  | no  |
| japan | staphylococcus epidermidis              | Bacteria | yes | yes | yes |
| japan | microporus xanthopus                    | Fungi    | no  | no  | no  |
| japan | calicotyle japonica                     | Helminth | no  | no  | no  |
| japan | infectious pancreatic necrosis virus    | Virus    | no  | no  | no  |
| japan | renibacterium salmoninarum              | Bacteria | no  | no  | no  |
| japan | enterobacter cloacae                    | Bacteria | yes | yes | no  |
| japan | microbacterium foliorum                 | Bacteria | no  | no  | no  |
| japan | comamonas testosteroni                  | Bacteria | yes | no  | no  |
| japan | pseudozyma antarctica                   | Fungi    | no  | no  | no  |
| japan | photobacterium leiognathi               | Bacteria | no  | no  | no  |
| japan | raphidascaris gigi                      | Helminth | no  | no  | no  |
| japan | acanthamoeba polyphaga                  | Protozoa | yes | no  | no  |
| japan | aeromonas sobria                        | Bacteria | yes | yes | no  |
| japan | enterococcus hirae                      | Bacteria | yes | yes | no  |
| japan | bacillus altitudinis                    | Bacteria | no  | no  | no  |
| japan | bacillus cereus                         | Bacteria | yes | yes | no  |
| japan | lactobacillus brevis                    | Bacteria | no  | no  | no  |
| japan | trichosporon asahii                     | Fungi    | yes | yes | no  |
| japan | burkholderia cepacia                    | Bacteria | yes | no  | no  |
| japan | mycobacterium bovis                     | Bacteria | yes | yes | yes |
| japan | cooperia oncophora                      | Helminth | no  | no  | no  |
| japan | rhodotorula slooffiae                   | Fungi    | no  | no  | no  |
| japan | babesia gibsoni                         | Protozoa | yes | yes | no  |
| japan | streptococcus dysgalactiae              | Bacteria | no  | no  | no  |
| japan | breviscolex orientalis                  | Helminth | no  | no  | no  |
| japan | francisella tularensis                  | Bacteria | yes | yes | yes |
| japan | candida parapsilosis                    | Fungi    | yes | yes | no  |
| japan | staphylococcus kloosii                  | Bacteria | no  | no  | no  |
| japan | lactobacillus casei                     | Bacteria | no  | no  | no  |
| japan | infectious hematopoietic necrosis virus | Virus    | no  | no  | no  |
| japan | rhinocladiella aquaspersa               | Fungi    | yes | no  | no  |
| japan | contraecum bioccai                      | Helminth | no  | no  | no  |
| japan | exophiala xenobiotica                   | Fungi    | no  | no  | no  |
| japan | eimeria ellipsoidalis                   | Protozoa | no  | no  | no  |
| japan | hepatitis delta virus                   | Virus    | yes | no  | no  |
| japan | anaplasma phagocytophilum               | Bacteria | no  | no  | no  |
| japan | alteromonas macleodii                   | Bacteria | no  | no  | no  |
| japan | cryptococcus gattii                     | Fungi    | no  | no  | no  |
| japan | aichi virus                             | Virus    | no  | no  | no  |
| japan | rabies virus                            | Virus    | yes | yes | yes |
| japan | trichophyton rubrum                     | Fungi    | yes | yes | no  |
| japan | emericella nidulans                     | Fungi    | no  | no  | no  |
| japan | acinetobacter junii                     | Bacteria | yes | no  | no  |
| japan | fusarium falciforme                     | Fungi    | no  | no  | no  |
| japan | cyphellophora laciniata                 | Fungi    | no  | no  | no  |
| japan | bartonella henselae                     | Bacteria | yes | yes | no  |
| japan | taenia saginata                         | Helminth | yes | yes | no  |
| japan | stenotrophomonas maltophilia            | Bacteria | no  | no  | no  |
| japan | anoxybacillus pushchinoensis            | Bacteria | no  | no  | no  |

|       |                                    |          |     |     |     |
|-------|------------------------------------|----------|-----|-----|-----|
| japan | human enterovirus a                | Virus    | yes | no  | no  |
| japan | enterococcus casseliflavus         | Bacteria | yes | no  | no  |
| japan | dengue virus                       | Virus    | no  | no  | no  |
| japan | enterococcus gilvus                | Bacteria | no  | no  | no  |
| japan | mariannaea camptospora             | Fungi    | no  | no  | no  |
| japan | brevibacillus agri                 | Bacteria | no  | no  | no  |
| japan | heligmosomoides kurilensis         | Helminth | no  | no  | no  |
| japan | staphylococcus chromogenes         | Bacteria | no  | no  | no  |
| japan | plasmodium malariae                | Protozoa | yes | yes | no  |
| japan | arthroderma gypseum                | Fungi    | no  | no  | no  |
| japan | cercopithifilaria longa            | Helminth | no  | no  | no  |
| japan | lactococcus lactis                 | Bacteria | no  | no  | no  |
| japan | babesia equi                       | Protozoa | no  | no  | no  |
| japan | cercopithifilaria crassa           | Helminth | no  | no  | no  |
| japan | fowl adenovirus c                  | Virus    | no  | no  | no  |
| japan | mycobacterium kansasii             | Bacteria | yes | yes | no  |
| japan | human enterovirus d                | Virus    | yes | no  | no  |
| japan | newcastle disease virus            | Virus    | yes | yes | no  |
| japan | vibrio mimicus                     | Bacteria | yes | yes | no  |
| japan | trichoderma atroviride             | Fungi    | no  | no  | no  |
| japan | mammalian orthoreovirus            | Virus    | no  | no  | no  |
| japan | gnathostoma nipponicum             | Helminth | yes | yes | no  |
| japan | gibberella intermedia              | Fungi    | no  | no  | no  |
| japan | helicobacter pylori                | Bacteria | yes | yes | no  |
| japan | bovine papular stomatitis virus    | Virus    | yes | yes | no  |
| japan | candida aaseri                     | Fungi    | no  | no  | no  |
| japan | vibrio fortis                      | Bacteria | no  | no  | no  |
| japan | ehrlichia muris                    | Bacteria | no  | no  | no  |
| japan | anisakis paggiae                   | Helminth | no  | no  | no  |
| japan | phaeoacremonium rubrigenum         | Fungi    | no  | no  | no  |
| japan | rahnella aquatilis                 | Bacteria | yes | no  | no  |
| japan | alcaligenes faecalis               | Bacteria | no  | no  | no  |
| japan | microsporidium cypselurus          | Fungi    | no  | no  | no  |
| japan | mycoplasma suis                    | Bacteria | no  | no  | no  |
| japan | arthrographis kalrae               | Fungi    | no  | no  | no  |
| japan | trichoderma longibrachiatum        | Fungi    | no  | no  | no  |
| japan | shuni virus                        | Virus    | no  | no  | no  |
| japan | shamonda virus                     | Virus    | no  | no  | no  |
| japan | treponema refringens               | Bacteria | no  | no  | no  |
| japan | human rhinovirus b                 | Virus    | yes | no  | no  |
| japan | cochliobolus australiensis         | Fungi    | no  | no  | no  |
| japan | trichophyton verrucosum            | Fungi    | yes | yes | no  |
| japan | triadinium caudatum                | Protozoa | no  | no  | no  |
| japan | human immunodeficiency virus 2     | Virus    | yes | no  | yes |
| japan | ascaris lumbricoides               | Helminth | yes | yes | no  |
| japan | leuconostoc citreum                | Bacteria | no  | no  | no  |
| japan | mycobacterium intracellulare       | Bacteria | no  | no  | no  |
| japan | selenomonas ruminantium            | Bacteria | no  | no  | no  |
| japan | rotavirus a                        | Virus    | yes | yes | yes |
| japan | viral hemorrhagic septicemia virus | Virus    | no  | no  | no  |

|       |                                     |          |     |     |     |
|-------|-------------------------------------|----------|-----|-----|-----|
| japan | cochliobolus lunatus                | Fungi    | no  | no  | no  |
| japan | equid herpesvirus 1                 | Virus    | no  | no  | no  |
| japan | nocardia amamiensis                 | Bacteria | no  | no  | no  |
| japan | clostridium perfringens             | Bacteria | yes | yes | no  |
| japan | euryhelmis costaricensis            | Helminth | no  | no  | no  |
| japan | cercopithifilaria japonica          | Helminth | no  | no  | no  |
| japan | coprinopsis cinerea                 | Fungi    | no  | no  | no  |
| japan | moniezia benedeni                   | Helminth | no  | no  | no  |
| japan | staphylococcus gallinarum           | Bacteria | no  | no  | no  |
| japan | primate t-lymphotropic virus 1      | Virus    | no  | no  | no  |
| japan | mumps virus                         | Virus    | yes | no  | no  |
| japan | campylobacter jejuni                | Bacteria | yes | yes | yes |
| japan | lysinibacillus fusiformis           | Bacteria | no  | no  | no  |
| japan | hafnia alvei                        | Bacteria | yes | yes | no  |
| japan | streptococcus pyogenes              | Bacteria | yes | yes | yes |
| japan | scedosporium apiospermum            | Fungi    | no  | no  | no  |
| japan | toxocara cati                       | Helminth | yes | yes | no  |
| japan | campylobacter coli                  | Bacteria | yes | yes | no  |
| japan | rhodotorula mucilaginosa            | Fungi    | yes | yes | no  |
| japan | acinetobacter johnsonii             | Bacteria | yes | no  | no  |
| japan | measles virus                       | Virus    | yes | yes | yes |
| japan | mycoplasma genitalium               | Bacteria | yes | no  | no  |
| japan | aggregatibacter actinomycetemcomita | Bacteria | no  | no  | no  |
| japan | pseudomonas plecoglossicida         | Bacteria | no  | no  | no  |
| japan | coccidioides immitis                | Fungi    | yes | yes | yes |
| japan | strongyloides procyonis             | Helminth | no  | no  | no  |
| japan | vibrio tapetis                      | Bacteria | no  | no  | no  |
| japan | taenia asiatica                     | Helminth | no  | no  | no  |
| japan | hepatitis c virus                   | Virus    | yes | no  | yes |
| japan | cordyceps bassiana                  | Fungi    | no  | no  | no  |
| japan | anisakis physeteris                 | Helminth | yes | yes | no  |
| japan | legionella anisa                    | Bacteria | yes | no  | no  |
| japan | cystoisospora belli                 | Protozoa | yes | yes | yes |
| japan | mycobacterium arupense              | Bacteria | no  | no  | no  |
| japan | campylobacter fetus                 | Bacteria | yes | yes | yes |
| japan | onchocerca dewittei                 | Helminth | no  | no  | no  |
| japan | vagococcus fluvialis                | Bacteria | no  | no  | no  |
| japan | aeromonas hydrophila                | Bacteria | yes | yes | yes |
| japan | human respiratory syncytial virus   | Virus    | yes | no  | no  |
| japan | shigella flexneri                   | Bacteria | yes | yes | no  |
| japan | anguillicola globiceps              | Helminth | no  | no  | no  |
| japan | francisella noatunensis             | Bacteria | no  | no  | no  |
| japan | human adenovirus c                  | Virus    | yes | no  | no  |
| japan | columbid herpesvirus 1              | Virus    | no  | no  | no  |
| japan | anisakis typica                     | Helminth | no  | no  | no  |
| japan | philometroides seriolaie            | Helminth | no  | no  | no  |
| japan | schizophyllum commune               | Fungi    | yes | no  | no  |
| japan | influenza c virus                   | Virus    | yes | yes | no  |
| japan | arcobacter butzleri                 | Bacteria | yes | yes | no  |
| japan | hepatitis e virus                   | Virus    | yes | yes | yes |



|       |                                |          |     |     |     |
|-------|--------------------------------|----------|-----|-----|-----|
| japan | human papillomavirus 16        | Virus    | no  | no  | no  |
| japan | shewanella woodyi              | Bacteria | no  | no  | no  |
| japan | cycloposthium bipalmatum       | Protozoa | no  | no  | no  |
| japan | human adenovirus b             | Virus    | yes | no  | no  |
| japan | human enterovirus b            | Virus    | yes | no  | yes |
| japan | anisakis brevispiculata        | Helminth | no  | no  | no  |
| japan | lecythophora mutabilis         | Fungi    | yes | no  | no  |
| japan | bovine papillomavirus 3        | Virus    | no  | no  | no  |
| japan | feline immunodeficiency virus  | Virus    | no  | no  | no  |
| japan | burkholderia fungorum          | Bacteria | no  | no  | no  |
| japan | lactobacillus salivarius       | Bacteria | no  | no  | no  |
| japan | aeromonas salmonicida          | Bacteria | no  | no  | no  |
| japan | pseudodactylogyrus bini        | Helminth | no  | no  | no  |
| japan | nocardia seriolae              | Bacteria | no  | no  | no  |
| japan | pseudodactylogyroides apogonis | Helminth | no  | no  | no  |
| japan | diphyllobothrium nihonkaiense  | Helminth | yes | yes | no  |
| japan | entamoeba coli                 | Protozoa | no  | no  | no  |
| japan | strongyloides ratti            | Helminth | no  | no  | no  |
| japan | strongyloides planiceps        | Helminth | no  | no  | no  |
| japan | human metapneumovirus          | Virus    | no  | no  | no  |
| japan | dictyostelium discoideum       | Protozoa | no  | no  | no  |
| japan | histophilus somni              | Bacteria | no  | no  | no  |
| japan | enterobacter aerogenes         | Bacteria | yes | yes | no  |
| japan | encephalitozoon cuniculi       | Fungi    | yes | yes | yes |
| japan | human adenovirus f             | Virus    | yes | no  | no  |
| japan | anaplasma bovis                | Bacteria | no  | no  | no  |
| japan | lactococcus garvieae           | Bacteria | no  | no  | no  |
| japan | eimeria bovis                  | Protozoa | no  | no  | no  |
| japan | citrobacter koseri             | Bacteria | yes | yes | no  |
| japan | paecilomyces lilacinus         | Fungi    | yes | yes | no  |
| japan | haemophilus influenzae         | Bacteria | yes | no  | yes |
| japan | pseudoterranova decipiens      | Helminth | yes | no  | no  |
| japan | borrelia garinii               | Bacteria | no  | no  | no  |
| japan | hepatitis a virus              | Virus    | yes | yes | yes |
| japan | anaplasma centrale             | Bacteria | no  | no  | no  |
| japan | streptococcus sobrinus         | Bacteria | yes | no  | no  |
| japan | bacillus coagulans             | Bacteria | yes | yes | no  |
| japan | neisseria sicca                | Bacteria | yes | no  | no  |
| japan | clostridium botulinum          | Bacteria | yes | yes | yes |
| japan | staphylococcus saprophyticus   | Bacteria | yes | no  | no  |
| japan | arthroderma otae               | Fungi    | no  | no  | no  |
| japan | aureobasidium pullulans        | Fungi    | yes | no  | no  |
| japan | grimontia hollisae             | Bacteria | no  | no  | no  |
| japan | isthmiophora hortensis         | Helminth | no  | no  | no  |
| japan | exophiala dermatitidis         | Fungi    | yes | no  | no  |
| japan | rickettsia japonica            | Bacteria | yes | yes | no  |
| japan | pepper mild mottle virus       | Virus    | no  | no  | no  |
| japan | human astrovirus               | Virus    | yes | no  | yes |
| japan | paracoccidioides brasiliensis  | Fungi    | yes | yes | no  |
| japan | trypanoxyuris atelis           | Helminth | no  | no  | no  |

|       |                                 |          |     |     |     |
|-------|---------------------------------|----------|-----|-----|-----|
| japan | enterococcus faecalis           | Bacteria | yes | yes | yes |
| japan | cladosporium cladosporioides    | Fungi    | yes | no  | no  |
| japan | acinetobacter baumannii         | Bacteria | yes | no  | no  |
| japan | hendra virus                    | Virus    | no  | no  | no  |
| japan | anisakis pegreffii              | Helminth | no  | no  | no  |
| japan | lysinibacillus sphaericus       | Bacteria | no  | no  | no  |
| japan | human rhinovirus a              | Virus    | yes | no  | no  |
| japan | neisseria meningitidis          | Bacteria | yes | no  | yes |
| japan | human immunodeficiency virus 1  | Virus    | yes | no  | yes |
| japan | sapporo virus                   | Virus    | no  | no  | no  |
| japan | schistosoma japonicum           | Helminth | yes | yes | no  |
| japan | listeria monocytogenes          | Bacteria | yes | yes | yes |
| japan | anisakis simplex                | Helminth | yes | yes | yes |
| japan | rotavirus c                     | Virus    | yes | yes | yes |
| japan | flavobacterium psychrophilum    | Bacteria | no  | no  | no  |
| japan | mycobacterium abscessus         | Bacteria | yes | yes | no  |
| japan | babesia canis                   | Protozoa | no  | no  | no  |
| japan | theileria sergenti              | Protozoa | no  | no  | no  |
| japan | kocuria marina                  | Bacteria | no  | no  | no  |
| japan | glugea plecoglossi              | Fungi    | no  | no  | no  |
| japan | eimeria auburnensis             | Protozoa | no  | no  | no  |
| japan | cochliobolus geniculatus        | Fungi    | no  | no  | no  |
| japan | bacillus subtilis               | Bacteria | yes | yes | no  |
| japan | sarcocystis cruzi               | Protozoa | no  | no  | no  |
| japan | human rhinovirus c              | Virus    | no  | no  | no  |
| japan | simian immunodeficiency virus   | Virus    | no  | no  | no  |
| japan | chlamydia trachomatis           | Bacteria | yes | yes | yes |
| japan | aliivibrio fischeri             | Bacteria | no  | no  | no  |
| japan | mycobacterium pseudoshottsii    | Bacteria | no  | no  | no  |
| japan | staphylococcus equorum          | Bacteria | no  | no  | no  |
| japan | brachyspira innocens            | Bacteria | no  | no  | no  |
| japan | feline foamy virus              | Virus    | no  | no  | no  |
| japan | enterococcus faecium            | Bacteria | yes | yes | yes |
| japan | human herpesvirus 3             | Virus    | no  | no  | no  |
| japan | anoplocephala perfoliata        | Helminth | no  | no  | no  |
| japan | exophiala spinifera             | Fungi    | yes | yes | no  |
| japan | borrelia burgdorferi            | Bacteria | yes | yes | yes |
| japan | photobacterium kishitanii       | Bacteria | no  | no  | no  |
| japan | pseudomonas anguilliseptica     | Bacteria | no  | no  | no  |
| japan | alphacoronavirus 1              | Virus    | no  | no  | no  |
| japan | khawia sinensis                 | Helminth | no  | no  | no  |
| japan | microbacterium esteraromaticum  | Bacteria | no  | no  | no  |
| japan | enterobius anthropopithecii     | Helminth | no  | no  | no  |
| japan | nocardia farcinica              | Bacteria | yes | yes | no  |
| japan | arthrobacter oxydans            | Bacteria | no  | no  | no  |
| japan | giardia intestinalis            | Protozoa | no  | no  | no  |
| japan | anaplasma platys                | Bacteria | no  | no  | no  |
| japan | ectromelia virus                | Virus    | no  | no  | no  |
| japan | taenia taeniaeformis            | Helminth | yes | yes | no  |
| japan | infectious bursal disease virus | Virus    | no  | no  | no  |

|       |                                 |          |     |     |     |
|-------|---------------------------------|----------|-----|-----|-----|
| japan | treponema phagedenis            | Bacteria | no  | no  | no  |
| japan | agrobacterium rhizogenes        | Bacteria | no  | no  | no  |
| japan | mycobacterium marinum           | Bacteria | yes | yes | yes |
| japan | enterococcus avium              | Bacteria | yes | yes | no  |
| japan | coccidioides posadasii          | Fungi    | no  | no  | no  |
| japan | fusarium solani                 | Fungi    | yes | yes | yes |
| japan | acinetobacter lwoffii           | Bacteria | yes | no  | no  |
| japan | eperythrozoon parvum            | Bacteria | no  | no  | no  |
| japan | leptospira borgpetersenii       | Bacteria | yes | yes | no  |
| japan | microbacterium oxydans          | Bacteria | no  | no  | no  |
| japan | giardia psittaci                | Protozoa | no  | no  | no  |
| japan | cupriavidus basilensis          | Bacteria | no  | no  | no  |
| japan | human adenovirus a              | Virus    | yes | no  | no  |
| japan | penicillium citrinum            | Fungi    | yes | no  | no  |
| japan | bacteroides fragilis            | Bacteria | yes | yes | no  |
| japan | methylobacterium gregans        | Bacteria | no  | no  | no  |
| japan | nippotaenia chaenogobii         | Helminth | no  | no  | no  |
| japan | anguillicoloides crassus        | Helminth | no  | no  | no  |
| japan | eimeria exigua                  | Protozoa | no  | no  | no  |
| japan | alternaria alternata            | Fungi    | yes | yes | no  |
| japan | mycobacterium tuberculosis      | Bacteria | yes | yes | yes |
| japan | ceriporia lacerata              | Fungi    | no  | no  | no  |
| japan | suid herpesvirus 1              | Virus    | no  | no  | no  |
| japan | bunyamwera virus                | Virus    | yes | yes | no  |
| japan | cryptosporidium hominis         | Protozoa | yes | no  | yes |
| japan | plasmodium falciparum           | Protozoa | yes | no  | yes |
| japan | mycobacterium avium             | Bacteria | yes | yes | yes |
| japan | leptospira interrogans          | Bacteria | yes | yes | yes |
| japan | borna disease virus             | Virus    | yes | yes | no  |
| japan | orchitophrya stellarum          | Protozoa | no  | no  | no  |
| japan | enterocytozoon bieneusi         | Fungi    | yes | no  | yes |
| japan | fusarium chlamydosporum         | Fungi    | yes | no  | no  |
| japan | escherichia coli                | Bacteria | yes | yes | yes |
| japan | escherichia albertii            | Bacteria | no  | no  | no  |
| japan | mesorhizobium loti              | Bacteria | no  | no  | no  |
| japan | streptococcus agalactiae        | Bacteria | yes | yes | no  |
| japan | human herpesvirus 6             | Virus    | yes | no  | no  |
| japan | human adenovirus e              | Virus    | yes | no  | no  |
| japan | vibrio furnissii                | Bacteria | yes | yes | no  |
| japan | pseudomonas putida              | Bacteria | yes | no  | no  |
| japan | human parechovirus              | Virus    | no  | no  | no  |
| japan | betacoronavirus 1               | Virus    | no  | no  | no  |
| japan | tamiami virus                   | Virus    | no  | no  | no  |
| japan | human herpesvirus 2             | Virus    | no  | no  | no  |
| japan | fusarium incarnatum             | Fungi    | yes | no  | no  |
| japan | pseudoterranova azarasi         | Helminth | no  | no  | no  |
| japan | campylobacter lari              | Bacteria | yes | yes | no  |
| japan | bacteroides dorei               | Bacteria | no  | no  | no  |
| japan | actinobacillus pleuropneumoniae | Bacteria | yes | yes | no  |
| japan | arthroderma benhamiae           | Fungi    | no  | no  | no  |

|       |                                         |          |     |     |     |
|-------|-----------------------------------------|----------|-----|-----|-----|
| japan | ajellomyces capsulatus                  | Fungi    | no  | no  | no  |
| japan | debaryomyces hansenii                   | Fungi    | no  | no  | no  |
| japan | ancylostoma ceylanicum                  | Helminth | yes | yes | no  |
| japan | taylorella equigenitalis                | Bacteria | no  | no  | no  |
| japan | neoheterobothrium hirame                | Helminth | no  | no  | no  |
| japan | aspergillus penicillioides              | Fungi    | no  | no  | no  |
| japan | nippotaenia mogurndae                   | Helminth | no  | no  | no  |
| japan | cladophialophora carrionii              | Fungi    | yes | no  | no  |
| japan | ralstonia pickettii                     | Bacteria | yes | no  | no  |
| japan | cryptosporidium muris                   | Protozoa | no  | no  | no  |
| japan | entamoeba histolytica                   | Protozoa | yes | yes | no  |
| japan | setaria digitata                        | Helminth | no  | no  | no  |
| japan | proteocephalus plecoglossi              | Helminth | no  | no  | no  |
| japan | variola virus                           | Virus    | no  | no  | no  |
| japan | meyerozyma guilliermondii               | Fungi    | no  | no  | no  |
| japan | anoplocephala magna                     | Helminth | no  | no  | no  |
| japan | ascaris suum                            | Helminth | yes | yes | no  |
| japan | corynebacterium ulcerans                | Bacteria | yes | yes | no  |
| japan | gnathostoma doloresi                    | Helminth | yes | yes | no  |
| japan | streptococcus pasteurianus              | Bacteria | no  | no  | no  |
| japan | baylisascaris procyonis                 | Helminth | yes | yes | no  |
| japan | prevotella ruminicola                   | Bacteria | yes | yes | no  |
| japan | clostridium septicum                    | Bacteria | yes | yes | no  |
| japan | canine distemper virus                  | Virus    | no  | no  | no  |
| japan | vibrio parahaemolyticus                 | Bacteria | yes | yes | yes |
| japan | fusarium oxysporum                      | Fungi    | yes | no  | yes |
| japan | rhodococcus erythropolis                | Bacteria | yes | no  | no  |
| japan | fingoldia magna                         | Bacteria | yes | no  | no  |
| japan | cryptococcus neoformans                 | Fungi    | yes | yes | yes |
| japan | citrobacter freundii                    | Bacteria | yes | yes | no  |
| japan | hymenolepis nana                        | Helminth | yes | yes | no  |
| japan | torque teno felis virus                 | Virus    | no  | no  | no  |
| japan | moraxella lacunata                      | Bacteria | yes | yes | no  |
| japan | strongyloides mirzai                    | Helminth | no  | no  | no  |
| japan | bluetongue virus                        | Virus    | no  | no  | no  |
| japan | chaetomium globosum                     | Fungi    | yes | no  | no  |
| japan | beak and feather disease virus          | Virus    | no  | no  | no  |
| japan | classical swine fever virus             | Virus    | no  | no  | no  |
| japan | gordonia terrae                         | Bacteria | yes | no  | no  |
| japan | chlamydophila pecorum                   | Bacteria | no  | no  | no  |
| japan | infectious spleen and kidney necrosis v | Virus    | no  | no  | no  |
| japan | onchocerca eberhardi                    | Helminth | no  | no  | no  |
| japan | bartonella clarridgeiae                 | Bacteria | no  | no  | no  |
| japan | aspergillus oryzae                      | Fungi    | yes | no  | no  |
| japan | cryptosporidium baileyi                 | Protozoa | no  | no  | no  |
| japan | fonsecaea pedrosoi                      | Fungi    | no  | no  | no  |
| japan | ochrobactrum anthropi                   | Bacteria | yes | no  | no  |
| japan | paragonimus miyazakii                   | Helminth | yes | yes | no  |
| japan | enterococcus durans                     | Bacteria | yes | yes | no  |
| japan | eimeria cylindrica                      | Protozoa | no  | no  | no  |

|       |                                       |          |     |     |     |
|-------|---------------------------------------|----------|-----|-----|-----|
| japan | candida zeylanoides                   | Fungi    | yes | no  | no  |
| japan | onchocerca skrjabini                  | Helminth | no  | no  | no  |
| japan | propionibacterium acnes               | Bacteria | yes | yes | no  |
| japan | human herpesvirus 7                   | Virus    | yes | no  | no  |
| japan | trypanosoma grosi                     | Protozoa | no  | no  | no  |
| japan | angiostrongylus cantonensis           | Helminth | yes | no  | no  |
| japan | nocardia exalbida                     | Bacteria | no  | no  | no  |
| japan | sphingomonas rhizogenes               | Bacteria | no  | no  | no  |
| japan | aeromonas caviae                      | Bacteria | yes | yes | yes |
| japan | human adenovirus d                    | Virus    | yes | no  | no  |
| japan | chicken anemia virus                  | Virus    | no  | no  | no  |
| japan | bacillus licheniformis                | Bacteria | yes | yes | no  |
| japan | pseudomonas fluorescens               | Bacteria | yes | no  | no  |
| japan | staphylococcus lugdunensis            | Bacteria | yes | no  | no  |
| japan | neurospora crassa                     | Fungi    | no  | no  | no  |
| japan | paraproteocephalus parasiluri         | Helminth | no  | no  | no  |
| japan | feline leukemia virus                 | Virus    | no  | no  | no  |
| japan | torque teno canis virus               | Virus    | no  | no  | no  |
| japan | budgerigar fledgling disease polyomav | Virus    | no  | no  | no  |
| japan | enterobius vermicularis               | Helminth | yes | yes | no  |
| japan | arthroderma vanbreuseghemii           | Fungi    | no  | no  | no  |
| japan | klebsiella pneumoniae                 | Bacteria | yes | yes | yes |
| japan | exophiala jeanselmei                  | Fungi    | yes | yes | no  |
| japan | phialophora verrucosa                 | Fungi    | yes | yes | no  |
| japan | gongylonema pulchrum                  | Helminth | yes | yes | no  |
| japan | leucocytozoon lovati                  | Protozoa | no  | no  | no  |
| japan | klebsiella oxytoca                    | Bacteria | yes | yes | no  |
| japan | hepatitis b virus                     | Virus    | yes | no  | yes |
| japan | leuconostoc pseudomesenteroides       | Bacteria | no  | no  | no  |
| japan | dirofilaria immitis                   | Helminth | yes | yes | no  |
| japan | yersinia aleksiciae                   | Bacteria | no  | no  | no  |
| japan | entamoeba nuttalli                    | Protozoa | no  | no  | no  |
| japan | streptococcus suis                    | Bacteria | yes | yes | no  |
| japan | eimeria alabamensis                   | Protozoa | no  | no  | no  |
| japan | plasmodium knowlesi                   | Protozoa | yes | yes | no  |
| japan | kurthia gibsonii                      | Bacteria | no  | no  | no  |
| japan | bacillus amyloliquefaciens            | Bacteria | no  | no  | no  |
| japan | rhodococcus fascians                  | Bacteria | yes | no  | no  |
| japan | mecistocirrus digitatus               | Helminth | yes | yes | no  |
| japan | bovine ephemeral fever virus          | Virus    | yes | yes | no  |
| japan | microsporium gallinae                 | Fungi    | yes | yes | no  |
| japan | microsporidium seriolae               | Fungi    | no  | no  | no  |
| japan | vibrio harveyi                        | Bacteria | no  | no  | no  |
| japan | bacteroides finegoldii                | Bacteria | no  | no  | no  |
| japan | clostridium baratii                   | Bacteria | yes | no  | no  |
| japan | norwalk virus                         | Virus    | yes | no  | yes |
| japan | toxocara tanuki                       | Helminth | no  | no  | no  |
| japan | mycobacterium ulcerans                | Bacteria | yes | yes | yes |
| japan | sporothrix schenckii                  | Fungi    | yes | yes | no  |
| japan | bacteroides salanitronis              | Bacteria | no  | no  | no  |

|       |                                     |          |     |     |     |
|-------|-------------------------------------|----------|-----|-----|-----|
| japan | gangesia parasiluri                 | Helminth | no  | no  | no  |
| japan | hymenolepis diminuta                | Helminth | yes | yes | no  |
| japan | gnathostoma spinigerum              | Helminth | yes | yes | no  |
| japan | theileria orientalis                | Protozoa | no  | no  | no  |
| japan | nocardia nova                       | Bacteria | yes | yes | no  |
| japan | human coronavirus 229e              | Virus    | yes | no  | no  |
| japan | echinococcus multilocularis         | Helminth | yes | yes | no  |
| japan | variovorax paradoxus                | Bacteria | no  | no  | no  |
| japan | aleutian mink disease virus         | Virus    | no  | no  | no  |
| japan | toxoplasma gondii                   | Protozoa | yes | yes | yes |
| japan | diplogonoporus balaenopterae        | Helminth | yes | yes | no  |
| japan | streptococcus iniae                 | Bacteria | no  | no  | no  |
| japan | aspergillus sydowii                 | Fungi    | no  | no  | no  |
| japan | bacillus pumilus                    | Bacteria | yes | no  | no  |
| japan | influenza b virus                   | Virus    | yes | yes | no  |
| japan | contraeaecum spiculigerum           | Helminth | no  | no  | no  |
| japan | candida tropicalis                  | Fungi    | yes | yes | no  |
| japan | adlercreutzia equolifaciens         | Bacteria | no  | no  | no  |
| japan | mycobacterium leprae                | Bacteria | yes | yes | yes |
| japan | lactobacillus plantarum             | Bacteria | no  | no  | no  |
| japan | yersinia pseudotuberculosis         | Bacteria | yes | yes | no  |
| japan | paragonimus iloktsuenensis          | Helminth | no  | no  | no  |
| japan | mycobacterium genavense             | Bacteria | yes | yes | no  |
| japan | human parainfluenza virus 3         | Virus    | yes | no  | no  |
| japan | capnocytophaga canimorsus           | Bacteria | yes | yes | no  |
| japan | proteus mirabilis                   | Bacteria | yes | yes | no  |
| japan | fasciola hepatica                   | Helminth | yes | yes | no  |
| japan | borrelia hispanica                  | Bacteria | yes | yes | no  |
| japan | listeria innocua                    | Bacteria | no  | no  | no  |
| japan | bacteroides uniformis               | Bacteria | yes | no  | no  |
| japan | cyprinid herpesvirus 3              | Virus    | no  | no  | no  |
| japan | eimeria reichenowi                  | Protozoa | no  | no  | no  |
| japan | photobacterium damsela              | Bacteria | yes | yes | no  |
| japan | serratia marcescens                 | Bacteria | yes | yes | yes |
| japan | orientia tsutsugamushi              | Bacteria | yes | yes | no  |
| japan | epizootic hemorrhagic disease virus | Virus    | no  | no  | no  |
| japan | yersinia enterocolitica             | Bacteria | yes | yes | yes |
| japan | delftia acidovorans                 | Bacteria | yes | no  | no  |
| japan | raoultella terrigena                | Bacteria | no  | no  | no  |
| japan | bergeyella zoohelcum                | Bacteria | yes | yes | no  |
| japan | aspergillus tamaris                 | Fungi    | no  | no  | no  |
| japan | pseudomonas aeruginosa              | Bacteria | yes | yes | yes |
| japan | akabane virus                       | Virus    | no  | no  | no  |
| japan | jc polyomavirus                     | Virus    | no  | no  | no  |
| japan | coxiella burnetii                   | Bacteria | yes | yes | no  |
| japan | ostertagia ostertagi                | Helminth | yes | yes | no  |
| japan | vibrio azureus                      | Bacteria | no  | no  | no  |
| japan | metagonimus yokogawai               | Helminth | yes | yes | no  |
| japan | moniezia expansa                    | Helminth | yes | yes | no  |
| japan | bertiella studeri                   | Helminth | yes | yes | no  |

|            |                                      |          |     |     |     |
|------------|--------------------------------------|----------|-----|-----|-----|
| japan      | yersinia pestis                      | Bacteria | yes | yes | yes |
| japan      | leuconostoc mesenteroides            | Bacteria | no  | no  | no  |
| jordan     | newcastle disease virus              | Virus    | yes | yes | no  |
| jordan     | foot-and-mouth disease virus         | Virus    | no  | no  | no  |
| jordan     | schizophyllum commune                | Fungi    | yes | no  | no  |
| jordan     | rabies virus                         | Virus    | yes | yes | yes |
| jordan     | influenza a virus                    | Virus    | yes | yes | yes |
| jordan     | human enterovirus b                  | Virus    | yes | no  | yes |
| jordan     | echinococcus granulosus              | Helminth | yes | yes | yes |
| kazakhstan | influenza a virus                    | Virus    | yes | yes | yes |
| kazakhstan | borrelia miyamotoi                   | Bacteria | no  | no  | no  |
| kazakhstan | crimean-congo hemorrhagic fever viru | Virus    | no  | no  | no  |
| kazakhstan | camelpox virus                       | Virus    | no  | no  | no  |
| kazakhstan | avian coronavirus                    | Virus    | no  | no  | no  |
| kazakhstan | leishmania turanica                  | Protozoa | no  | no  | no  |
| kazakhstan | catenotaenioides kirgizica           | Helminth | no  | no  | no  |
| kazakhstan | hepatitis b virus                    | Virus    | yes | no  | yes |
| kazakhstan | human immunodeficiency virus 1       | Virus    | yes | no  | yes |
| kazakhstan | ectromelia virus                     | Virus    | no  | no  | no  |
| kazakhstan | measles virus                        | Virus    | yes | yes | yes |
| kazakhstan | cordyceps bassiana                   | Fungi    | no  | no  | no  |
| kazakhstan | yersinia pestis                      | Bacteria | yes | yes | yes |
| kazakhstan | helicobacter pylori                  | Bacteria | yes | yes | no  |
| kazakhstan | catenotaenia microti                 | Helminth | no  | no  | no  |
| kazakhstan | newcastle disease virus              | Virus    | yes | yes | no  |
| kazakhstan | borrelia garinii                     | Bacteria | no  | no  | no  |
| kenya      | cryptosporidium meleagridis          | Protozoa | no  | no  | no  |
| kenya      | foot-and-mouth disease virus         | Virus    | no  | no  | no  |
| kenya      | neisseria gonorrhoeae                | Bacteria | yes | no  | yes |
| kenya      | plasmodium knowlesi                  | Protozoa | yes | yes | no  |
| kenya      | lactobacillus fermentum              | Bacteria | no  | no  | no  |
| kenya      | weissella confusa                    | Bacteria | no  | no  | no  |
| kenya      | bacillus endophyticus                | Bacteria | no  | no  | no  |
| kenya      | trypanosoma simiae                   | Protozoa | no  | no  | no  |
| kenya      | akabane virus                        | Virus    | no  | no  | no  |
| kenya      | human respiratory syncytial virus    | Virus    | yes | no  | no  |
| kenya      | arthroderma benhamiae                | Fungi    | no  | no  | no  |
| kenya      | human astrovirus                     | Virus    | yes | no  | yes |
| kenya      | human enterovirus a                  | Virus    | yes | no  | no  |
| kenya      | anaplasma marginale                  | Bacteria | no  | no  | no  |
| kenya      | chlamydia trachomatis                | Bacteria | yes | yes | yes |
| kenya      | fusarium solani                      | Fungi    | yes | yes | yes |
| kenya      | california encephalitis virus        | Virus    | yes | yes | yes |
| kenya      | staphylococcus aureus                | Bacteria | yes | yes | yes |
| kenya      | morganella morganii                  | Bacteria | yes | yes | no  |
| kenya      | taenia hydatigena                    | Helminth | no  | no  | no  |
| kenya      | bacillus megaterium                  | Bacteria | no  | no  | no  |
| kenya      | hepatitis b virus                    | Virus    | yes | no  | yes |
| kenya      | bunyamwera virus                     | Virus    | yes | yes | no  |
| kenya      | african swine fever virus            | Virus    | no  | no  | no  |

|       |                                |          |     |     |     |
|-------|--------------------------------|----------|-----|-----|-----|
| kenya | schistosoma haematobium        | Helminth | yes | yes | no  |
| kenya | dugbe virus                    | Virus    | yes | yes | no  |
| kenya | rotavirus a                    | Virus    | yes | yes | yes |
| kenya | simian foamy virus             | Virus    | no  | no  | no  |
| kenya | human enterovirus c            | Virus    | yes | no  | no  |
| kenya | taenia madoquae                | Helminth | no  | no  | no  |
| kenya | lactobacillus plantarum        | Bacteria | no  | no  | no  |
| kenya | trypanosoma brucei             | Protozoa | yes | yes | yes |
| kenya | salmonella enterica            | Bacteria | no  | no  | no  |
| kenya | bacillus subtilis              | Bacteria | yes | yes | no  |
| kenya | enterobacter ludwigii          | Bacteria | no  | no  | no  |
| kenya | schistosoma mansoni            | Helminth | yes | yes | yes |
| kenya | theileria parva                | Protozoa | no  | no  | no  |
| kenya | vibrio cholerae                | Bacteria | yes | no  | yes |
| kenya | yellow fever virus             | Virus    | yes | yes | yes |
| kenya | leishmania donovani            | Protozoa | yes | yes | yes |
| kenya | xanthomonas campestris         | Bacteria | no  | no  | no  |
| kenya | plasmodium falciparum          | Protozoa | yes | no  | yes |
| kenya | human immunodeficiency virus 2 | Virus    | yes | no  | yes |
| kenya | theileria equi                 | Protozoa | no  | no  | no  |
| kenya | trichinella nelsoni            | Helminth | yes | yes | no  |
| kenya | helicobacter pylori            | Bacteria | yes | yes | no  |
| kenya | cryptosporidium muris          | Protozoa | no  | no  | no  |
| kenya | human herpesvirus 2            | Virus    | no  | no  | no  |
| kenya | pseudomonas oryzihabitans      | Bacteria | no  | no  | no  |
| kenya | jc polyomavirus                | Virus    | no  | no  | no  |
| kenya | leishmania major               | Protozoa | yes | yes | no  |
| kenya | leishmania tropica             | Protozoa | yes | yes | no  |
| kenya | ewingella americana            | Bacteria | yes | no  | no  |
| kenya | taenia serialis                | Helminth | yes | no  | no  |
| kenya | mycobacterium tuberculosis     | Bacteria | yes | yes | yes |
| kenya | theileria mutans               | Protozoa | no  | no  | no  |
| kenya | human enterovirus b            | Virus    | yes | no  | yes |
| kenya | rift valley fever virus        | Virus    | yes | yes | yes |
| kenya | ascaris lumbricoides           | Helminth | yes | yes | no  |
| kenya | rinderpest virus               | Virus    | no  | no  | no  |
| kenya | aspergillus niger              | Fungi    | yes | yes | no  |
| kenya | influenza b virus              | Virus    | yes | yes | no  |
| kenya | influenza a virus              | Virus    | yes | yes | yes |
| kenya | measles virus                  | Virus    | yes | yes | yes |
| kenya | bluetongue virus               | Virus    | no  | no  | no  |
| kenya | pseudomonas aeruginosa         | Bacteria | yes | yes | yes |
| kenya | human parvovirus b19           | Virus    | no  | no  | no  |
| kenya | ophiostoma stenoceras          | Fungi    | no  | no  | no  |
| kenya | lagos bat virus                | Virus    | no  | no  | no  |
| kenya | feline immunodeficiency virus  | Virus    | no  | no  | no  |
| kenya | ross river virus               | Virus    | yes | yes | yes |
| kenya | enterocytozoon bienewisi       | Fungi    | yes | no  | yes |
| kenya | haemophilus influenzae         | Bacteria | yes | no  | yes |
| kenya | cryptosporidium hominis        | Protozoa | yes | no  | yes |



|          |                                       |          |     |     |     |
|----------|---------------------------------------|----------|-----|-----|-----|
| kenya    | corynebacterium pseudotuberculosis    | Bacteria | yes | yes | no  |
| kenya    | taenia regis                          | Helminth | no  | no  | no  |
| kenya    | streptococcus pneumoniae              | Bacteria | yes | yes | yes |
| kenya    | human herpesvirus 1                   | Virus    | no  | no  | no  |
| kenya    | echinococcus granulosus               | Helminth | yes | yes | yes |
| kenya    | escherichia coli                      | Bacteria | yes | yes | yes |
| kenya    | trypanosoma evansi                    | Protozoa | no  | no  | no  |
| kenya    | schizophyllum commune                 | Fungi    | yes | no  | no  |
| kenya    | simian immunodeficiency virus         | Virus    | no  | no  | no  |
| kenya    | taenia saginata                       | Helminth | yes | yes | no  |
| kenya    | lumpy skin disease virus              | Virus    | no  | no  | no  |
| kenya    | lake victoria marburgvirus            | Virus    | no  | no  | no  |
| kenya    | cryptosporidium parvum                | Protozoa | yes | yes | yes |
| kenya    | yersinia pestis                       | Bacteria | yes | yes | yes |
| kenya    | trichomonas vaginalis                 | Protozoa | yes | no  | yes |
| kenya    | hepatitis c virus                     | Virus    | yes | no  | yes |
| kenya    | rahnella aquatilis                    | Bacteria | yes | no  | no  |
| kenya    | bk polyomavirus                       | Virus    | no  | no  | no  |
| kenya    | fusarium oxysporum                    | Fungi    | yes | no  | yes |
| kenya    | klebsiella pneumoniae                 | Bacteria | yes | yes | yes |
| kenya    | west Nile virus                       | Virus    | yes | yes | yes |
| kenya    | entamoeba polecki                     | Protozoa | yes | yes | no  |
| kenya    | wuchereria bancrofti                  | Helminth | yes | no  | yes |
| kenya    | echinococcus canadensis               | Helminth | no  | no  | no  |
| kenya    | trypanosoma congolense                | Protozoa | no  | no  | no  |
| kenya    | haemophilus ducreyi                   | Bacteria | yes | no  | yes |
| kenya    | human immunodeficiency virus 1        | Virus    | yes | no  | yes |
| kenya    | rabies virus                          | Virus    | yes | yes | yes |
| kenya    | acinetobacter baumannii               | Bacteria | yes | no  | no  |
| kenya    | Crimean-Congo hemorrhagic fever virus | Virus    | no  | no  | no  |
| kenya    | staphylococcus epidermidis            | Bacteria | yes | yes | yes |
| kiribati | dengue virus                          | Virus    | no  | no  | no  |
| kiribati | jc polyomavirus                       | Virus    | no  | no  | no  |
| kiribati | hepatitis b virus                     | Virus    | yes | no  | yes |
| kuwait   | mycobacterium gordonae                | Bacteria | yes | no  | no  |
| kuwait   | mycobacterium chelonae                | Bacteria | yes | yes | no  |
| kuwait   | dietzia natronolimnaea                | Bacteria | no  | no  | no  |
| kuwait   | vibrio communis                       | Bacteria | no  | no  | no  |
| kuwait   | cryptosporidium hominis               | Protozoa | yes | no  | yes |
| kuwait   | candida glabrata                      | Fungi    | yes | yes | yes |
| kuwait   | schizorchis caballeroi                | Helminth | no  | no  | no  |
| kuwait   | jc polyomavirus                       | Virus    | no  | no  | no  |
| kuwait   | bk polyomavirus                       | Virus    | no  | no  | no  |
| kuwait   | foot-and-mouth disease virus          | Virus    | no  | no  | no  |
| kuwait   | bluetongue virus                      | Virus    | no  | no  | no  |
| kuwait   | pseudomonas aeruginosa                | Bacteria | yes | yes | yes |
| kuwait   | vibrio shilonii                       | Bacteria | no  | no  | no  |
| kuwait   | mycobacterium abscessus               | Bacteria | yes | yes | no  |
| kuwait   | vibrio fortis                         | Bacteria | no  | no  | no  |
| kuwait   | mycobacterium kansasii                | Bacteria | yes | yes | no  |

|            |                                  |          |     |     |     |
|------------|----------------------------------|----------|-----|-----|-----|
| kuwait     | vibrio sinaloensis               | Bacteria | no  | no  | no  |
| kuwait     | human herpesvirus 8              | Virus    | yes | no  | yes |
| kuwait     | aspergillus flavus               | Fungi    | no  | no  | no  |
| kuwait     | cryptococcus neoformans          | Fungi    | yes | yes | yes |
| kuwait     | agrobacterium tumefaciens        | Bacteria | no  | no  | no  |
| kuwait     | bacteroides fragilis             | Bacteria | yes | yes | no  |
| kuwait     | hepatitis b virus                | Virus    | yes | no  | yes |
| kuwait     | mycobacterium chlorophenolicum   | Bacteria | no  | no  | no  |
| kuwait     | mycobacterium fortuitum          | Bacteria | no  | no  | no  |
| kuwait     | paecilomyces lilacinus           | Fungi    | yes | yes | no  |
| kuwait     | dietzia maris                    | Bacteria | no  | no  | no  |
| kuwait     | mycobacterium tuberculosis       | Bacteria | yes | yes | yes |
| kuwait     | photobacterium phosphoreum       | Bacteria | no  | no  | no  |
| kuwait     | vibrio azureus                   | Bacteria | no  | no  | no  |
| kuwait     | influenza a virus                | Virus    | yes | yes | yes |
| kuwait     | mycobacterium intracellulare     | Bacteria | no  | no  | no  |
| kuwait     | vibrio parahaemolyticus          | Bacteria | yes | yes | yes |
| kuwait     | vibrio alginolyticus             | Bacteria | yes | yes | no  |
| kuwait     | micrococcus yunnanensis          | Bacteria | no  | no  | no  |
| kuwait     | hepatitis c virus                | Virus    | yes | no  | yes |
| kuwait     | fowl adenovirus c                | Virus    | no  | no  | no  |
| kuwait     | cryptosporidium parvum           | Protozoa | yes | yes | yes |
| kuwait     | peste-des-petits-ruminants virus | Virus    | no  | no  | no  |
| kyrgyzstan | influenza a virus                | Virus    | yes | yes | yes |
| kyrgyzstan | measles virus                    | Virus    | yes | yes | yes |
| kyrgyzstan | tick-borne encephalitis virus    | Virus    | no  | no  | no  |
| kyrgyzstan | nosema ceranae                   | Fungi    | no  | no  | no  |
| kyrgyzstan | pseudomonas fluorescens          | Bacteria | yes | no  | no  |
| kyrgyzstan | yersinia pestis                  | Bacteria | yes | yes | yes |
| kyrgyzstan | human parvovirus b19             | Virus    | no  | no  | no  |
| kyrgyzstan | human enterovirus b              | Virus    | yes | no  | yes |
| kyrgyzstan | acinetobacter calcoaceticus      | Bacteria | yes | no  | no  |
| kyrgyzstan | hepatitis e virus                | Virus    | yes | yes | yes |
| kyrgyzstan | cordyceps bassiana               | Fungi    | no  | no  | no  |
| kyrgyzstan | aravan virus                     | Virus    | no  | no  | no  |
| laos       | hepatitis b virus                | Virus    | yes | no  | yes |
| laos       | opisthorchis viverrini           | Helminth | yes | yes | no  |
| laos       | hepatitis c virus                | Virus    | yes | no  | yes |
| laos       | schistosoma mekongi              | Helminth | yes | yes | no  |
| laos       | bordetella hinzii                | Bacteria | no  | no  | no  |
| laos       | vibrio cholerae                  | Bacteria | yes | no  | yes |
| laos       | ancylostoma duodenale            | Helminth | yes | yes | no  |
| laos       | foot-and-mouth disease virus     | Virus    | no  | no  | no  |
| laos       | trichostrongylus colubriformis   | Helminth | yes | yes | no  |
| laos       | ancylostoma ceylanicum           | Helminth | yes | yes | no  |
| laos       | plasmodium falciparum            | Protozoa | yes | no  | yes |
| laos       | japanese encephalitis virus      | Virus    | yes | yes | yes |
| laos       | ancylostoma caninum              | Helminth | yes | yes | no  |
| laos       | seoul virus                      | Virus    | yes | yes | yes |
| laos       | orientia tsutsugamushi           | Bacteria | yes | yes | no  |

|         |                                        |          |     |     |     |
|---------|----------------------------------------|----------|-----|-----|-----|
| laos    | human enterovirus c                    | Virus    | yes | no  | no  |
| laos    | haplorchis taichui                     | Helminth | yes | yes | no  |
| latvia  | borrelia garinii                       | Bacteria | no  | no  | no  |
| latvia  | influenza b virus                      | Virus    | yes | yes | no  |
| latvia  | epicoccum nigrum                       | Fungi    | no  | no  | no  |
| latvia  | retrovarium brooksi                    | Helminth | no  | no  | no  |
| latvia  | babesia canis                          | Protozoa | no  | no  | no  |
| latvia  | agrobacterium larrymoorei              | Bacteria | no  | no  | no  |
| latvia  | porcine reproductive and respiratory s | Virus    | no  | no  | no  |
| latvia  | measles virus                          | Virus    | yes | yes | yes |
| latvia  | tick-borne encephalitis virus          | Virus    | no  | no  | no  |
| latvia  | rabies virus                           | Virus    | yes | yes | yes |
| latvia  | cladosporium cladosporioides           | Fungi    | yes | no  | no  |
| latvia  | human enterovirus a                    | Virus    | yes | no  | no  |
| latvia  | gyrodactylus salaris                   | Helminth | no  | no  | no  |
| latvia  | human enterovirus b                    | Virus    | yes | no  | yes |
| latvia  | aureobasidium pullulans                | Fungi    | yes | no  | no  |
| latvia  | cryptococcus neoformans                | Fungi    | yes | yes | yes |
| latvia  | anaplasma phagocytophilum              | Bacteria | no  | no  | no  |
| latvia  | aspergillus ustus                      | Fungi    | no  | no  | no  |
| latvia  | hepatitis b virus                      | Virus    | yes | no  | yes |
| latvia  | rhodotorula mucilaginosa               | Fungi    | yes | yes | no  |
| latvia  | human respiratory syncytial virus      | Virus    | yes | no  | no  |
| latvia  | human immunodeficiency virus 1         | Virus    | yes | no  | yes |
| lebanon | human immunodeficiency virus 1         | Virus    | yes | no  | yes |
| lebanon | influenza b virus                      | Virus    | yes | yes | no  |
| lebanon | influenza a virus                      | Virus    | yes | yes | yes |
| lebanon | mycobacterium tuberculosis             | Bacteria | yes | yes | yes |
| lebanon | hepatitis b virus                      | Virus    | yes | no  | yes |
| lebanon | leishmania donovani                    | Protozoa | yes | yes | yes |
| lebanon | rabies virus                           | Virus    | yes | yes | yes |
| lebanon | foot-and-mouth disease virus           | Virus    | no  | no  | no  |
| lebanon | bacillus thuringiensis                 | Bacteria | yes | no  | no  |
| lebanon | escherichia coli                       | Bacteria | yes | yes | yes |
| lesotho | measles virus                          | Virus    | yes | yes | yes |
| liberia | trypanosoma congolense                 | Protozoa | no  | no  | no  |
| liberia | schistosoma mansoni                    | Helminth | yes | yes | yes |
| liberia | measles virus                          | Virus    | yes | yes | yes |
| liberia | human immunodeficiency virus 1         | Virus    | yes | no  | yes |
| liberia | plasmodium falciparum                  | Protozoa | yes | no  | yes |
| liberia | lassa virus                            | Virus    | yes | yes | yes |
| liberia | monkeypox virus                        | Virus    | yes | yes | yes |
| liberia | human enterovirus c                    | Virus    | yes | no  | no  |
| liberia | plasmodium vivax                       | Protozoa | yes | no  | yes |
| libya   | escherichia coli                       | Bacteria | yes | yes | yes |
| libya   | pseudomonas aeruginosa                 | Bacteria | yes | yes | yes |
| libya   | rotavirus a                            | Virus    | yes | yes | yes |
| libya   | human enterovirus b                    | Virus    | yes | no  | yes |
| libya   | human immunodeficiency virus 1         | Virus    | yes | no  | yes |
| libya   | measles virus                          | Virus    | yes | yes | yes |

|               |                                        |          |     |     |     |
|---------------|----------------------------------------|----------|-----|-----|-----|
| libya         | foot-and-mouth disease virus           | Virus    | no  | no  | no  |
| liechtenstein | borna disease virus                    | Virus    | yes | yes | no  |
| lithuania     | phyllodistomum folium                  | Helminth | no  | no  | no  |
| lithuania     | rhodococcus equi                       | Bacteria | yes | yes | no  |
| lithuania     | asaia bogorensis                       | Bacteria | no  | no  | no  |
| lithuania     | cordyceps bassiana                     | Fungi    | no  | no  | no  |
| lithuania     | fusarium oxysporum                     | Fungi    | yes | no  | yes |
| lithuania     | eubothrium crassum                     | Helminth | no  | no  | no  |
| lithuania     | aureobasidium pullulans                | Fungi    | yes | no  | no  |
| lithuania     | cetacean morbillivirus                 | Virus    | no  | no  | no  |
| lithuania     | edwardsiella tarda                     | Bacteria | yes | yes | no  |
| lithuania     | human immunodeficiency virus 1         | Virus    | yes | no  | yes |
| lithuania     | pycnoporus heteroporus                 | Helminth | no  | no  | no  |
| lithuania     | classical swine fever virus            | Virus    | no  | no  | no  |
| lithuania     | meyerozyma guilliermondii              | Fungi    | no  | no  | no  |
| lithuania     | santee-cooper ranavirus                | Virus    | no  | no  | no  |
| lithuania     | mucor hiemalis                         | Fungi    | yes | no  | no  |
| lithuania     | erwinia persicina                      | Bacteria | no  | no  | no  |
| lithuania     | malassezia restricta                   | Fungi    | yes | yes | no  |
| lithuania     | vagococcus fluvialis                   | Bacteria | no  | no  | no  |
| lithuania     | pseudomonas plecoglossicida            | Bacteria | no  | no  | no  |
| lithuania     | porcine reproductive and respiratory s | Virus    | no  | no  | no  |
| lithuania     | aeromonas sobria                       | Bacteria | yes | yes | no  |
| lithuania     | penicillium citreonigrum               | Fungi    | no  | no  | no  |
| lithuania     | lecythophora mutabilis                 | Fungi    | yes | no  | no  |
| lithuania     | tick-borne encephalitis virus          | Virus    | no  | no  | no  |
| lithuania     | anaplasma phagocytophilum              | Bacteria | no  | no  | no  |
| lithuania     | cladosporium cladosporioides           | Fungi    | yes | no  | no  |
| lithuania     | acinetobacter baumannii                | Bacteria | yes | no  | no  |
| lithuania     | pseudomonas aeruginosa                 | Bacteria | yes | yes | yes |
| lithuania     | human enterovirus b                    | Virus    | yes | no  | yes |
| lithuania     | microbacterium oxydans                 | Bacteria | no  | no  | no  |
| lithuania     | human enterovirus a                    | Virus    | yes | no  | no  |
| lithuania     | lecythophora hoffmannii                | Fungi    | yes | no  | no  |
| lithuania     | alternaria alternata                   | Fungi    | yes | yes | no  |
| lithuania     | chaetomium globosum                    | Fungi    | yes | no  | no  |
| lithuania     | redspotted grouper nervous necrosis v  | Virus    | no  | no  | no  |
| lithuania     | epicoccum nigrum                       | Fungi    | no  | no  | no  |
| lithuania     | helicobacter pylori                    | Bacteria | yes | yes | no  |
| lithuania     | cladosporium sphaerospermum            | Fungi    | no  | no  | no  |
| lithuania     | schizophyllum commune                  | Fungi    | yes | no  | no  |
| lithuania     | aspergillus versicolor                 | Fungi    | yes | no  | no  |
| lithuania     | penicillium chrysogenum                | Fungi    | yes | no  | no  |
| lithuania     | enterococcus faecalis                  | Bacteria | yes | yes | yes |
| lithuania     | aeromonas salmonicida                  | Bacteria | no  | no  | no  |
| lithuania     | mumps virus                            | Virus    | yes | no  | no  |
| lithuania     | gardnerella vaginalis                  | Bacteria | yes | no  | no  |
| lithuania     | influenza a virus                      | Virus    | yes | yes | yes |
| lithuania     | penicillium commune                    | Fungi    | yes | no  | no  |
| luxembourg    | measles virus                          | Virus    | yes | yes | yes |

|            |                                 |          |     |     |     |
|------------|---------------------------------|----------|-----|-----|-----|
| luxembourg | human parvovirus b19            | Virus    | no  | no  | no  |
| luxembourg | heligmosomoides polygyrus       | Helminth | no  | no  | no  |
| luxembourg | human immunodeficiency virus 2  | Virus    | yes | no  | yes |
| luxembourg | norwalk virus                   | Virus    | yes | no  | yes |
| luxembourg | human immunodeficiency virus 1  | Virus    | yes | no  | yes |
| luxembourg | cowpox virus                    | Virus    | yes | yes | no  |
| macao      | hepatitis c virus               | Virus    | yes | no  | yes |
| macedonia  | rabies virus                    | Virus    | yes | yes | yes |
| macedonia  | torque teno sus virus 2         | Virus    | no  | no  | no  |
| macedonia  | jc polyomavirus                 | Virus    | no  | no  | no  |
| macedonia  | torque teno sus virus 1         | Virus    | no  | no  | no  |
| madagascar | african swine fever virus       | Virus    | no  | no  | no  |
| madagascar | meggittina baeri                | Helminth | no  | no  | no  |
| madagascar | xanthomonas campestris          | Bacteria | no  | no  | no  |
| madagascar | fonsecaea pedrosoi              | Fungi    | no  | no  | no  |
| madagascar | influenza b virus               | Virus    | yes | yes | no  |
| madagascar | dengue virus                    | Virus    | no  | no  | no  |
| madagascar | yersinia pestis                 | Bacteria | yes | yes | yes |
| madagascar | staphylococcus aureus           | Bacteria | yes | yes | yes |
| madagascar | influenza a virus               | Virus    | yes | yes | yes |
| madagascar | taenia solium                   | Helminth | yes | no  | yes |
| madagascar | plasmodium vivax                | Protozoa | yes | no  | yes |
| madagascar | plasmodium falciparum           | Protozoa | yes | no  | yes |
| madagascar | rift valley fever virus         | Virus    | yes | yes | yes |
| madagascar | leptospira interrogans          | Bacteria | yes | yes | yes |
| madagascar | anguillicoloides novaezelandiae | Helminth | no  | no  | no  |
| madagascar | human astrovirus                | Virus    | yes | no  | yes |
| madagascar | west nile virus                 | Virus    | yes | yes | yes |
| madagascar | mycobacterium tuberculosis      | Bacteria | yes | yes | yes |
| madagascar | human enterovirus c             | Virus    | yes | no  | no  |
| madagascar | hepatitis b virus               | Virus    | yes | no  | yes |
| madagascar | candida albicans                | Fungi    | yes | yes | yes |
| madagascar | rabies virus                    | Virus    | yes | yes | yes |
| madagascar | metapolystoma bryoonis          | Helminth | no  | no  | no  |
| madagascar | anguillicoloides papernai       | Helminth | no  | no  | no  |
| madagascar | schistosoma mansoni             | Helminth | yes | yes | yes |
| madagascar | norwalk virus                   | Virus    | yes | no  | yes |
| madagascar | human enterovirus b             | Virus    | yes | no  | yes |
| madagascar | escherichia coli                | Bacteria | yes | yes | yes |
| madagascar | hepatitis c virus               | Virus    | yes | no  | yes |
| malawi     | influenza a virus               | Virus    | yes | yes | yes |
| malawi     | human immunodeficiency virus 2  | Virus    | yes | no  | yes |
| malawi     | rotavirus a                     | Virus    | yes | yes | yes |
| malawi     | foot-and-mouth disease virus    | Virus    | no  | no  | no  |
| malawi     | plasmodium vivax                | Protozoa | yes | no  | yes |
| malawi     | cryptosporidium parvum          | Protozoa | yes | yes | yes |
| malawi     | streptococcus pneumoniae        | Bacteria | yes | yes | yes |
| malawi     | cryptococcus neoformans         | Fungi    | yes | yes | yes |
| malawi     | human immunodeficiency virus 1  | Virus    | yes | no  | yes |
| malawi     | salmonella enterica             | Bacteria | no  | no  | no  |

|          |                                         |          |     |     |     |
|----------|-----------------------------------------|----------|-----|-----|-----|
| malawi   | african swine fever virus               | Virus    | no  | no  | no  |
| malawi   | plasmodium falciparum                   | Protozoa | yes | no  | yes |
| malawi   | hepatitis b virus                       | Virus    | yes | no  | yes |
| malawi   | human herpesvirus 5                     | Virus    | yes | no  | yes |
| malawi   | haemophilus influenzae                  | Bacteria | yes | no  | yes |
| malawi   | neisseria meningitidis                  | Bacteria | yes | no  | yes |
| malawi   | human herpesvirus 8                     | Virus    | yes | no  | yes |
| malawi   | measles virus                           | Virus    | yes | yes | yes |
| malawi   | mycobacterium tuberculosis              | Bacteria | yes | yes | yes |
| malawi   | entamoeba coli                          | Protozoa | no  | no  | no  |
| malawi   | mycobacterium leprae                    | Bacteria | yes | yes | yes |
| malaysia | enterobacter ludwigii                   | Bacteria | no  | no  | no  |
| malaysia | bacillus megaterium                     | Bacteria | no  | no  | no  |
| malaysia | fowl adenovirus d                       | Virus    | no  | no  | no  |
| malaysia | gibberella intermedia                   | Fungi    | no  | no  | no  |
| malaysia | microbacterium paraoxydans              | Bacteria | no  | no  | no  |
| malaysia | bacillus cereus                         | Bacteria | yes | yes | no  |
| malaysia | ascaris lumbricoides                    | Helminth | yes | yes | no  |
| malaysia | dengue virus                            | Virus    | no  | no  | no  |
| malaysia | enterobacter cancerogenus               | Bacteria | yes | yes | no  |
| malaysia | helicobacter pylori                     | Bacteria | yes | yes | no  |
| malaysia | pseudotobothrium arii                   | Helminth | no  | no  | no  |
| malaysia | staphylococcus kloosii                  | Bacteria | no  | no  | no  |
| malaysia | bacillus anthracis                      | Bacteria | yes | yes | yes |
| malaysia | dichelobacter nodosus                   | Bacteria | yes | yes | no  |
| malaysia | prochristianella macracantha            | Helminth | no  | no  | no  |
| malaysia | pseudomonas aeruginosa                  | Bacteria | yes | yes | yes |
| malaysia | human adenovirus c                      | Virus    | yes | no  | no  |
| malaysia | brevibacillus brevis                    | Bacteria | yes | no  | no  |
| malaysia | plasmodium vivax                        | Protozoa | yes | no  | yes |
| malaysia | chikungunya virus                       | Virus    | yes | yes | yes |
| malaysia | ehrlichia canis                         | Bacteria | no  | no  | no  |
| malaysia | chlamydia trachomatis                   | Bacteria | yes | yes | yes |
| malaysia | trygonicola macroporus                  | Helminth | no  | no  | no  |
| malaysia | nelson bay orthoreovirus                | Virus    | no  | no  | no  |
| malaysia | infectious spleen and kidney necrosis v | Virus    | no  | no  | no  |
| malaysia | plasmodium falciparum                   | Protozoa | yes | no  | yes |
| malaysia | salmonella enterica                     | Bacteria | no  | no  | no  |
| malaysia | ancylostoma ceylanicum                  | Helminth | yes | yes | no  |
| malaysia | leclercia adecarboxylata                | Bacteria | no  | no  | no  |
| malaysia | micrococcus luteus                      | Bacteria | no  | no  | no  |
| malaysia | human immunodeficiency virus 2          | Virus    | yes | no  | yes |
| malaysia | aeromonas jandaei                       | Bacteria | no  | no  | no  |
| malaysia | jc polyomavirus                         | Virus    | no  | no  | no  |
| malaysia | bacillus altitudinis                    | Bacteria | no  | no  | no  |
| malaysia | enterobacter aerogenes                  | Bacteria | yes | yes | no  |
| malaysia | neocallimastix frontalis                | Fungi    | no  | no  | no  |
| malaysia | cryptosporidium hominis                 | Protozoa | yes | no  | yes |
| malaysia | human enterovirus c                     | Virus    | yes | no  | no  |
| malaysia | aeromonas veronii                       | Bacteria | yes | no  | yes |

|          |                                |          |     |     |     |
|----------|--------------------------------|----------|-----|-----|-----|
| malaysia | weissella cibaria              | Bacteria | no  | no  | no  |
| malaysia | haemonchus contortus           | Helminth | yes | yes | no  |
| malaysia | shigella sonnei                | Bacteria | yes | yes | no  |
| malaysia | exiguobacterium acetylicum     | Bacteria | no  | no  | no  |
| malaysia | sanguilevator yearsleyi        | Helminth | no  | no  | no  |
| malaysia | schizophyllum commune          | Fungi    | yes | no  | no  |
| malaysia | bacillus subtilis              | Bacteria | yes | yes | no  |
| malaysia | staphylococcus epidermidis     | Bacteria | yes | yes | yes |
| malaysia | west Nile virus                | Virus    | yes | yes | yes |
| malaysia | klebsiella oxytoca             | Bacteria | yes | yes | no  |
| malaysia | human immunodeficiency virus 1 | Virus    | yes | no  | yes |
| malaysia | aeromonas hydrophila           | Bacteria | yes | yes | yes |
| malaysia | multicotyle purvisi            | Helminth | no  | no  | no  |
| malaysia | tembusu virus                  | Virus    | no  | no  | no  |
| malaysia | heteronybelinia estigmena      | Helminth | no  | no  | no  |
| malaysia | plasmodium cynomolgi           | Protozoa | no  | no  | no  |
| malaysia | Newcastle disease virus        | Virus    | yes | yes | no  |
| malaysia | lysibacillus fusiformis        | Bacteria | no  | no  | no  |
| malaysia | bacillus mycoides              | Bacteria | yes | no  | no  |
| malaysia | fusarium oxysporum             | Fungi    | yes | no  | yes |
| malaysia | staphylococcus hominis         | Bacteria | no  | no  | no  |
| malaysia | fusarium solani                | Fungi    | yes | yes | yes |
| malaysia | candida tropicalis             | Fungi    | yes | yes | no  |
| malaysia | enterococcus casseliflavus     | Bacteria | yes | no  | no  |
| malaysia | aspergillus fumigatus          | Fungi    | no  | no  | no  |
| malaysia | photobacterium damsela         | Bacteria | yes | yes | no  |
| malaysia | bacillus tequilensis           | Bacteria | no  | no  | no  |
| malaysia | cryptosporidium meleagridis    | Protozoa | no  | no  | no  |
| malaysia | acinetobacter radioresistens   | Bacteria | yes | no  | no  |
| malaysia | bacillus endophyticus          | Bacteria | no  | no  | no  |
| malaysia | spironucleus meleagridis       | Protozoa | no  | no  | no  |
| malaysia | hepatitis B virus              | Virus    | yes | no  | yes |
| malaysia | rotavirus A                    | Virus    | yes | yes | yes |
| malaysia | Serratia liquefaciens          | Bacteria | no  | no  | no  |
| malaysia | human rhinovirus A             | Virus    | yes | no  | no  |
| malaysia | Escherichia coli               | Bacteria | yes | yes | yes |
| malaysia | trypanosoma evansi             | Protozoa | no  | no  | no  |
| malaysia | feline leukemia virus          | Virus    | no  | no  | no  |
| malaysia | Burkholderia pseudomallei      | Bacteria | yes | yes | no  |
| malaysia | cryptosporidium parvum         | Protozoa | yes | yes | yes |
| malaysia | Nybelinia sphyrnae             | Helminth | no  | no  | no  |
| malaysia | staphylococcus pasteurii       | Bacteria | no  | no  | no  |
| malaysia | hepatitis C virus              | Virus    | yes | no  | yes |
| malaysia | Paragonimus westermani         | Helminth | yes | yes | no  |
| malaysia | bacillus thuringiensis         | Bacteria | yes | no  | no  |
| malaysia | aspergillus oryzae             | Fungi    | yes | no  | no  |
| malaysia | bacillus flexus                | Bacteria | no  | no  | no  |
| malaysia | plasmodium knowlesi            | Protozoa | yes | yes | no  |
| malaysia | Stenotrophomonas maltophilia   | Bacteria | no  | no  | no  |
| malaysia | Neocallimastix patriciarum     | Fungi    | no  | no  | no  |

|          |                                 |          |     |     |     |
|----------|---------------------------------|----------|-----|-----|-----|
| malaysia | vibrio harveyi                  | Bacteria | no  | no  | no  |
| malaysia | nybelinia africana              | Helminth | no  | no  | no  |
| malaysia | alphacoronavirus 1              | Virus    | no  | no  | no  |
| malaysia | bacillus pumilus                | Bacteria | yes | no  | no  |
| malaysia | human adenovirus b              | Virus    | yes | no  | no  |
| malaysia | polystomoides siebenrockiella   | Helminth | no  | no  | no  |
| malaysia | streptococcus pyogenes          | Bacteria | yes | yes | yes |
| malaysia | polystomoides malayi            | Helminth | no  | no  | no  |
| malaysia | acinetobacter baumannii         | Bacteria | yes | no  | no  |
| malaysia | nybelinia aequidentata          | Helminth | no  | no  | no  |
| malaysia | sundapolystoma chalconotae      | Helminth | no  | no  | no  |
| malaysia | neopolystoma liewi              | Helminth | no  | no  | no  |
| malaysia | vibrio cholerae                 | Bacteria | yes | no  | yes |
| malaysia | anaplasma platys                | Bacteria | no  | no  | no  |
| malaysia | klebsiella pneumoniae           | Bacteria | yes | yes | yes |
| malaysia | influenza a virus               | Virus    | yes | yes | yes |
| malaysia | cellulosimicrobium cellulans    | Bacteria | no  | no  | no  |
| malaysia | lysiniibacillus sphaericus      | Bacteria | no  | no  | no  |
| malaysia | bacillus amyloliquefaciens      | Bacteria | no  | no  | no  |
| malaysia | botryosphaeria dothidea         | Fungi    | no  | no  | no  |
| malaysia | schistosoma malayensis          | Helminth | yes | yes | no  |
| malaysia | polystomoides bourgati          | Helminth | no  | no  | no  |
| malaysia | nipah virus                     | Virus    | yes | yes | yes |
| malaysia | bacillus aquimaris              | Bacteria | no  | no  | no  |
| malaysia | human herpesvirus 4             | Virus    | no  | no  | no  |
| malaysia | pseudomonas oryzihabitans       | Bacteria | no  | no  | no  |
| malaysia | mycobacterium ulcerans          | Bacteria | yes | yes | yes |
| malaysia | pantoea agglomerans             | Bacteria | yes | yes | no  |
| malaysia | human enterovirus a             | Virus    | yes | no  | no  |
| malaysia | chicken anemia virus            | Virus    | no  | no  | no  |
| malaysia | pantoea eucrina                 | Bacteria | no  | no  | no  |
| malaysia | pasteurella multocida           | Bacteria | yes | yes | no  |
| malaysia | polystomoides asiaticus         | Helminth | no  | no  | no  |
| malaysia | acinetobacter calcoaceticus     | Bacteria | yes | no  | no  |
| malaysia | vibrio parahaemolyticus         | Bacteria | yes | yes | yes |
| malaysia | staphylococcus aureus           | Bacteria | yes | yes | yes |
| malaysia | fowl adenovirus e               | Virus    | no  | no  | no  |
| malaysia | sundanonchus micropeltis        | Helminth | no  | no  | no  |
| malaysia | measles virus                   | Virus    | yes | yes | yes |
| malaysia | necator americanus              | Helminth | yes | yes | no  |
| malaysia | candida rugosa                  | Fungi    | yes | no  | no  |
| malaysia | trichuris trichiura             | Helminth | yes | yes | no  |
| malaysia | rhinebothrium megacanthophallus | Helminth | no  | no  | no  |
| malaysia | pseudomonas putida              | Bacteria | yes | no  | no  |
| malaysia | influenza b virus               | Virus    | yes | yes | no  |
| malaysia | botryosphaeria rhodina          | Fungi    | no  | no  | no  |
| malaysia | foot-and-mouth disease virus    | Virus    | no  | no  | no  |
| malaysia | shirleyrhynchus aetobatis       | Helminth | no  | no  | no  |
| malaysia | norwalk virus                   | Virus    | yes | no  | yes |
| malaysia | thaparocleidus siamensis        | Helminth | no  | no  | no  |



|          |                                 |          |     |     |     |
|----------|---------------------------------|----------|-----|-----|-----|
| malaysia | burkholderia cepacia            | Bacteria | yes | no  | no  |
| malaysia | infectious bursal disease virus | Virus    | no  | no  | no  |
| malaysia | human rhinovirus c              | Virus    | no  | no  | no  |
| malaysia | mitsuokella jalaludinii         | Bacteria | no  | no  | no  |
| malaysia | enterobius vermicularis         | Helminth | yes | yes | no  |
| malaysia | japanese encephalitis virus     | Virus    | yes | yes | yes |
| malaysia | enterobacter cloacae            | Bacteria | yes | yes | no  |
| malaysia | cronobacter sakazakii           | Bacteria | no  | no  | no  |
| malaysia | geobacillus stearothermophilus  | Bacteria | no  | no  | no  |
| malaysia | bacillus licheniformis          | Bacteria | yes | yes | no  |
| malaysia | getah virus                     | Virus    | yes | yes | no  |
| malaysia | neisseria gonorrhoeae           | Bacteria | yes | no  | yes |
| malaysia | aeromonas tecta                 | Bacteria | no  | no  | no  |
| malaysia | pasteurella pneumotropica       | Bacteria | yes | yes | no  |
| malaysia | acinetobacter johnsonii         | Bacteria | yes | no  | no  |
| malaysia | brucella melitensis             | Bacteria | yes | yes | yes |
| malaysia | enterobacter hormaechei         | Bacteria | yes | yes | no  |
| maldives | fonsecaea pedrosoi              | Fungi    | no  | no  | no  |
| maldives | leptospira interrogans          | Bacteria | yes | yes | yes |
| maldives | plasmodium vivax                | Protozoa | yes | no  | yes |
| maldives | escherichia coli                | Bacteria | yes | yes | yes |
| maldives | saccharomyces cerevisiae        | Fungi    | yes | no  | no  |
| maldives | neisseria gonorrhoeae           | Bacteria | yes | no  | yes |
| maldives | primate t-lymphotropic virus 1  | Virus    | no  | no  | no  |
| maldives | plasmodium falciparum           | Protozoa | yes | no  | yes |
| maldives | human herpesvirus 3             | Virus    | no  | no  | no  |
| maldives | entamoeba histolytica           | Protozoa | yes | yes | no  |
| maldives | trichuris trichiura             | Helminth | yes | yes | no  |
| maldives | wuchereria bancrofti            | Helminth | yes | no  | yes |
| maldives | burkholderia pseudomallei       | Bacteria | yes | yes | no  |
| maldives | mycobacterium tuberculosis      | Bacteria | yes | yes | yes |
| maldives | staphylococcus aureus           | Bacteria | yes | yes | yes |
| maldives | bacillus cereus                 | Bacteria | yes | yes | no  |
| maldives | yersinia pestis                 | Bacteria | yes | yes | yes |
| maldives | chlamydia trachomatis           | Bacteria | yes | yes | yes |
| maldives | mycobacterium leprae            | Bacteria | yes | yes | yes |
| maldives | salmonella enterica             | Bacteria | no  | no  | no  |
| maldives | human enterovirus c             | Virus    | yes | no  | no  |
| maldives | influenza b virus               | Virus    | yes | yes | no  |
| maldives | necator americanus              | Helminth | yes | yes | no  |
| maldives | leishmania donovani             | Protozoa | yes | yes | yes |
| maldives | schistosoma haematobium         | Helminth | yes | yes | no  |
| maldives | enterococcus faecalis           | Bacteria | yes | yes | yes |
| maldives | human immunodeficiency virus 2  | Virus    | yes | no  | yes |
| maldives | hepatitis a virus               | Virus    | yes | yes | yes |
| maldives | chikungunya virus               | Virus    | yes | yes | yes |
| maldives | hepatitis b virus               | Virus    | yes | no  | yes |
| maldives | vibrio parahaemolyticus         | Bacteria | yes | yes | yes |
| maldives | clostridium perfringens         | Bacteria | yes | yes | no  |
| maldives | aspergillus fumigatus           | Fungi    | no  | no  | no  |

|          |                                |          |     |     |     |
|----------|--------------------------------|----------|-----|-----|-----|
| maldives | shigella dysenteriae           | Bacteria | yes | yes | yes |
| maldives | hepatitis c virus              | Virus    | yes | no  | yes |
| maldives | taenia solium                  | Helminth | yes | no  | yes |
| maldives | fasciola gigantica             | Helminth | yes | yes | no  |
| maldives | ascaris lumbricoides           | Helminth | yes | yes | no  |
| maldives | human immunodeficiency virus 1 | Virus    | yes | no  | yes |
| maldives | orientia tsutsugamushi         | Bacteria | yes | yes | no  |
| maldives | vibrio cholerae                | Bacteria | yes | no  | yes |
| maldives | pseudomonas aeruginosa         | Bacteria | yes | yes | yes |
| maldives | dengue virus                   | Virus    | no  | no  | no  |
| maldives | bacillus anthracis             | Bacteria | yes | yes | yes |
| maldives | streptococcus pneumoniae       | Bacteria | yes | yes | yes |
| maldives | treponema pallidum             | Bacteria | yes | no  | yes |
| maldives | klebsiella pneumoniae          | Bacteria | yes | yes | yes |
| maldives | plasmodium ovale               | Protozoa | yes | no  | no  |
| maldives | trichomonas vaginalis          | Protozoa | yes | no  | yes |
| maldives | plasmodium malariae            | Protozoa | yes | yes | no  |
| maldives | candida albicans               | Fungi    | yes | yes | yes |
| maldives | helicobacter pylori            | Bacteria | yes | yes | no  |
| maldives | rift valley fever virus        | Virus    | yes | yes | yes |
| maldives | haemophilus influenzae         | Bacteria | yes | no  | yes |
| maldives | schistosoma mansoni            | Helminth | yes | yes | yes |
| maldives | angiostrongylus cantonensis    | Helminth | yes | no  | no  |
| maldives | japanese encephalitis virus    | Virus    | yes | yes | yes |
| maldives | influenza a virus              | Virus    | yes | yes | yes |
| maldives | mycobacterium bovis            | Bacteria | yes | yes | yes |
| maldives | aspergillus flavus             | Fungi    | no  | no  | no  |
| maldives | west Nile virus                | Virus    | yes | yes | yes |
| maldives | toxoplasma gondii              | Protozoa | yes | yes | yes |
| maldives | rabies virus                   | Virus    | yes | yes | yes |
| mali     | bacillus subtilis              | Bacteria | yes | yes | no  |
| mali     | cladosporium cladosporioides   | Fungi    | yes | no  | no  |
| mali     | plasmodium falciparum          | Protozoa | yes | no  | yes |
| mali     | staphylococcus gallinarum      | Bacteria | no  | no  | no  |
| mali     | neisseria meningitidis         | Bacteria | yes | no  | yes |
| mali     | foot-and-mouth disease virus   | Virus    | no  | no  | no  |
| mali     | bacillus firmus                | Bacteria | no  | no  | no  |
| mali     | escherichia coli               | Bacteria | yes | yes | yes |
| mali     | aspergillus niger              | Fungi    | yes | yes | no  |
| mali     | onchocerca gutturosa           | Helminth | no  | no  | no  |
| mali     | bacillus mycoides              | Bacteria | yes | no  | no  |
| mali     | kocuria polaris                | Bacteria | no  | no  | no  |
| mali     | neoscytalidium dimidiatum      | Fungi    | no  | no  | no  |
| mali     | haemophilus influenzae         | Bacteria | yes | no  | yes |
| mali     | human immunodeficiency virus 1 | Virus    | yes | no  | yes |
| mali     | onchocerca volvulus            | Helminth | yes | yes | yes |
| mali     | bacillus megaterium            | Bacteria | no  | no  | no  |
| mali     | bacillus endophyticus          | Bacteria | no  | no  | no  |
| mali     | mycobacterium leprae           | Bacteria | yes | yes | yes |
| mali     | neisseria lactamica            | Bacteria | yes | no  | no  |

|            |                                |          |     |     |     |
|------------|--------------------------------|----------|-----|-----|-----|
| mali       | hepatitis delta virus          | Virus    | yes | no  | no  |
| mali       | acinetobacter calcoaceticus    | Bacteria | yes | no  | no  |
| mali       | schistosoma haematobium        | Helminth | yes | yes | no  |
| mali       | bacillus pumilus               | Bacteria | yes | no  | no  |
| mali       | aspergillus versicolor         | Fungi    | yes | no  | no  |
| mali       | schistosoma mansoni            | Helminth | yes | yes | yes |
| mali       | hepatitis b virus              | Virus    | yes | no  | yes |
| mali       | onchocerca ochengi             | Helminth | no  | no  | no  |
| mali       | staphylococcus xylosus         | Bacteria | no  | no  | no  |
| mali       | human immunodeficiency virus 2 | Virus    | yes | no  | yes |
| malta      | african swine fever virus      | Virus    | no  | no  | no  |
| malta      | vibrio cholerae                | Bacteria | yes | no  | yes |
| malta      | leishmania infantum            | Protozoa | yes | yes | yes |
| malta      | staphylococcus aureus          | Bacteria | yes | yes | yes |
| martinique | human immunodeficiency virus 1 | Virus    | yes | no  | yes |
| martinique | human immunodeficiency virus 2 | Virus    | yes | no  | yes |
| martinique | mycobacterium tuberculosis     | Bacteria | yes | yes | yes |
| martinique | primate t-lymphotropic virus 1 | Virus    | no  | no  | no  |
| martinique | schistosoma mansoni            | Helminth | yes | yes | yes |
| martinique | dengue virus                   | Virus    | no  | no  | no  |
| martinique | hepatitis c virus              | Virus    | yes | no  | yes |
| martinique | bluetongue virus               | Virus    | no  | no  | no  |
| martinique | hepatitis b virus              | Virus    | yes | no  | yes |
| mauritania | rift valley fever virus        | Virus    | yes | yes | yes |
| mauritania | fasciola gigantica             | Helminth | yes | yes | no  |
| mauritania | haemonchus longistipes         | Helminth | no  | no  | no  |
| mauritania | bk polyomavirus                | Virus    | no  | no  | no  |
| mauritania | jc polyomavirus                | Virus    | no  | no  | no  |
| mauritania | hepatitis b virus              | Virus    | yes | no  | yes |
| mauritania | echinococcus granulosus        | Helminth | yes | yes | yes |
| mauritania | plasmodium vivax               | Protozoa | yes | no  | yes |
| mauritania | measles virus                  | Virus    | yes | yes | yes |
| mauritania | echinococcus canadensis        | Helminth | no  | no  | no  |
| mauritania | human immunodeficiency virus 2 | Virus    | yes | no  | yes |
| mauritania | theileria annulata             | Protozoa | no  | no  | no  |
| mauritiu   | xanthomonas campestris         | Bacteria | no  | no  | no  |
| mauritiu   | human immunodeficiency virus 2 | Virus    | yes | no  | yes |
| mauritiu   | african swine fever virus      | Virus    | no  | no  | no  |
| mauritiu   | jc polyomavirus                | Virus    | no  | no  | no  |
| mauritiu   | mycoplasma capricolum          | Bacteria | no  | no  | no  |
| mauritiu   | human immunodeficiency virus 1 | Virus    | yes | no  | yes |
| mauritiu   | chikungunya virus              | Virus    | yes | yes | yes |
| mauritiu   | human papillomavirus 18        | Virus    | no  | no  | no  |
| mauritiu   | schistosoma haematobium        | Helminth | yes | yes | no  |
| mayotte    | plasmodium falciparum          | Protozoa | yes | no  | yes |
| mayotte    | corynebacterium diphtheriae    | Bacteria | yes | no  | yes |
| mayotte    | measles virus                  | Virus    | yes | yes | yes |
| mayotte    | chikungunya virus              | Virus    | yes | yes | yes |
| mayotte    | influenza a virus              | Virus    | yes | yes | yes |
| mexico     | bacillus megaterium            | Bacteria | no  | no  | no  |

|        |                                  |          |     |     |     |
|--------|----------------------------------|----------|-----|-----|-----|
| mexico | bacillus cereus                  | Bacteria | yes | yes | no  |
| mexico | corynebacterium amycolatum       | Bacteria | yes | no  | yes |
| mexico | rotavirus a                      | Virus    | yes | yes | yes |
| mexico | taenia solium                    | Helminth | yes | no  | yes |
| mexico | plasmodium vivax                 | Protozoa | yes | no  | yes |
| mexico | fusarium napiforme               | Fungi    | yes | no  | no  |
| mexico | salmonella enterica              | Bacteria | no  | no  | no  |
| mexico | pseudomonas monteilii            | Bacteria | no  | no  | no  |
| mexico | entamoeba histolytica            | Protozoa | yes | yes | no  |
| mexico | newcastle disease virus          | Virus    | yes | yes | no  |
| mexico | rabbit hemorrhagic disease virus | Virus    | no  | no  | no  |
| mexico | mycobacterium bovis              | Bacteria | yes | yes | yes |
| mexico | pediococcus acidilactici         | Bacteria | no  | no  | no  |
| mexico | vibrio campbellii                | Bacteria | no  | no  | no  |
| mexico | staphylococcus gallinarum        | Bacteria | no  | no  | no  |
| mexico | fusarium solani                  | Fungi    | yes | yes | yes |
| mexico | anaplasma marginale              | Bacteria | no  | no  | no  |
| mexico | lysiniabacillus fusiformis       | Bacteria | no  | no  | no  |
| mexico | agrobacterium tumefaciens        | Bacteria | no  | no  | no  |
| mexico | aspergillus aculeatinus          | Fungi    | no  | no  | no  |
| mexico | vibrio communis                  | Bacteria | no  | no  | no  |
| mexico | rahnella aquatilis               | Bacteria | yes | no  | no  |
| mexico | mycobacterium arupense           | Bacteria | no  | no  | no  |
| mexico | avian metapneumovirus            | Virus    | no  | no  | no  |
| mexico | human adenovirus b               | Virus    | yes | no  | no  |
| mexico | cryptosporidium hominis          | Protozoa | yes | no  | yes |
| mexico | haematoloechus longiplexus       | Helminth | no  | no  | no  |
| mexico | aeromonas veronii                | Bacteria | yes | no  | yes |
| mexico | soonwooa buanensis               | Bacteria | no  | no  | no  |
| mexico | vibrio sinaloensis               | Bacteria | no  | no  | no  |
| mexico | rhinebothrium maccallumi         | Helminth | no  | no  | no  |
| mexico | rickettsia typhi                 | Bacteria | yes | yes | no  |
| mexico | bacillus altitudinis             | Bacteria | no  | no  | no  |
| mexico | coprinellus domesticus           | Fungi    | no  | no  | no  |
| mexico | primate t-lymphotropic virus 2   | Virus    | no  | no  | no  |
| mexico | glyphelmins quieta               | Helminth | no  | no  | no  |
| mexico | pantoea agglomerans              | Bacteria | yes | yes | no  |
| mexico | glyphelmins tuxtlasensis         | Helminth | no  | no  | no  |
| mexico | human immunodeficiency virus 1   | Virus    | yes | no  | yes |
| mexico | bacillus amyloliquefaciens       | Bacteria | no  | no  | no  |
| mexico | pediococcus pentosaceus          | Bacteria | no  | no  | no  |
| mexico | alternaria alternata             | Fungi    | yes | yes | no  |
| mexico | haemophilus influenzae           | Bacteria | yes | no  | yes |
| mexico | human enterovirus c              | Virus    | yes | no  | no  |
| mexico | fusarium oxysporum               | Fungi    | yes | no  | yes |
| mexico | edwardsiella tarda               | Bacteria | yes | yes | no  |
| mexico | babesia bigemina                 | Protozoa | no  | no  | no  |
| mexico | bacillus thuringiensis           | Bacteria | yes | no  | no  |
| mexico | burkholderia tropica             | Bacteria | no  | no  | no  |
| mexico | helicobacter pylori              | Bacteria | yes | yes | no  |

|        |                                   |          |     |     |     |
|--------|-----------------------------------|----------|-----|-----|-----|
| mexico | gnathostoma binucleatum           | Helminth | no  | no  | no  |
| mexico | hepatitis e virus                 | Virus    | yes | yes | yes |
| mexico | litobothrium amplifica            | Helminth | no  | no  | no  |
| mexico | pseudomonas mosselii              | Bacteria | no  | no  | no  |
| mexico | bacillus mycoides                 | Bacteria | yes | no  | no  |
| mexico | enterococcus faecium              | Bacteria | yes | yes | yes |
| mexico | contraecaecum rudolphii           | Helminth | no  | no  | no  |
| mexico | choledocystus hepaticus           | Helminth | no  | no  | no  |
| mexico | hepatitis b virus                 | Virus    | yes | no  | yes |
| mexico | proteocephalus chamelensis        | Helminth | no  | no  | no  |
| mexico | mycobacterium gordonae            | Bacteria | yes | no  | no  |
| mexico | ajellomyces capsulatus            | Fungi    | no  | no  | no  |
| mexico | pleisiomonas shigelloides         | Bacteria | yes | no  | no  |
| mexico | proteus penneri                   | Bacteria | yes | yes | no  |
| mexico | human papillomavirus 16           | Virus    | no  | no  | no  |
| mexico | babesia bovis                     | Protozoa | yes | yes | no  |
| mexico | cochliobolus lunatus              | Fungi    | no  | no  | no  |
| mexico | glypthelmins poncedeleoni         | Helminth | no  | no  | no  |
| mexico | megathylacoides giganteum         | Helminth | no  | no  | no  |
| mexico | chelonid herpesvirus 5            | Virus    | no  | no  | no  |
| mexico | megathylacoides lamothei          | Helminth | no  | no  | no  |
| mexico | cryptococcus neoformans           | Fungi    | yes | yes | yes |
| mexico | glypthelmins brownorumae          | Helminth | no  | no  | no  |
| mexico | bacillus flexus                   | Bacteria | no  | no  | no  |
| mexico | bunyamwera virus                  | Virus    | yes | yes | no  |
| mexico | trypanosoma cruzi                 | Protozoa | yes | yes | yes |
| mexico | lactobacillus rhamnosus           | Bacteria | no  | no  | no  |
| mexico | lactobacillus casei               | Bacteria | no  | no  | no  |
| mexico | vibrio alginolyticus              | Bacteria | yes | yes | no  |
| mexico | mycobacterium avium               | Bacteria | yes | yes | yes |
| mexico | human herpesvirus 2               | Virus    | no  | no  | no  |
| mexico | streptococcus pneumoniae          | Bacteria | yes | yes | yes |
| mexico | vibrio parahaemolyticus           | Bacteria | yes | yes | yes |
| mexico | mycobacterium manteni             | Bacteria | no  | no  | no  |
| mexico | cordyceps bassiana                | Fungi    | no  | no  | no  |
| mexico | vibrio ponticus                   | Bacteria | no  | no  | no  |
| mexico | glypthelmins californiensis       | Helminth | no  | no  | no  |
| mexico | pachypsolus irroratus             | Helminth | no  | no  | no  |
| mexico | enterobacter asburiae             | Bacteria | yes | yes | no  |
| mexico | mycobacterium smegmatis           | Bacteria | no  | no  | no  |
| mexico | infectious bursal disease virus   | Virus    | no  | no  | no  |
| mexico | eastern equine encephalitis virus | Virus    | yes | yes | yes |
| mexico | paecilomyces lilacinus            | Fungi    | yes | yes | no  |
| mexico | enterobacter hormaechei           | Bacteria | yes | yes | no  |
| mexico | haematoloechus floedae            | Helminth | no  | no  | no  |
| mexico | bacillus tequilensis              | Bacteria | no  | no  | no  |
| mexico | human adenovirus c                | Virus    | yes | no  | no  |
| mexico | human immunodeficiency virus 2    | Virus    | yes | no  | yes |
| mexico | aspergillus niger                 | Fungi    | yes | yes | no  |
| mexico | staphylococcus epidermidis        | Bacteria | yes | yes | yes |

|        |                               |          |     |     |     |
|--------|-------------------------------|----------|-----|-----|-----|
| mexico | trichoderma longibrachiatum   | Fungi    | no  | no  | no  |
| mexico | hepatitis c virus             | Virus    | yes | no  | yes |
| mexico | klebsiella pneumoniae         | Bacteria | yes | yes | yes |
| mexico | bacillus subtilis             | Bacteria | yes | yes | no  |
| mexico | lysinibacillus sphaericus     | Bacteria | no  | no  | no  |
| mexico | rickettsia felis              | Bacteria | yes | yes | no  |
| mexico | corallobothrium fimbriatum    | Helminth | no  | no  | no  |
| mexico | vibrio rotiferianus           | Bacteria | no  | no  | no  |
| mexico | fowl adenovirus c             | Virus    | no  | no  | no  |
| mexico | pseudomonas pseudoalcaligenes | Bacteria | yes | no  | no  |
| mexico | streptococcus pyogenes        | Bacteria | yes | yes | yes |
| mexico | gnathostoma turgidum          | Helminth | no  | no  | no  |
| mexico | acinetobacter lwoffii         | Bacteria | yes | no  | no  |
| mexico | emericella rugulosa           | Fungi    | no  | no  | no  |
| mexico | vibrio ichthyenteri           | Bacteria | no  | no  | no  |
| mexico | crassicutis cichlasomae       | Helminth | no  | no  | no  |
| mexico | aeromonas jandaei             | Bacteria | no  | no  | no  |
| mexico | gibberella moniliformis       | Fungi    | no  | no  | no  |
| mexico | west nile virus               | Virus    | yes | yes | yes |
| mexico | brevibacterium casei          | Bacteria | no  | no  | no  |
| mexico | euryhaliotrema perezponcei    | Helminth | no  | no  | no  |
| mexico | cryptosporidium parvum        | Protozoa | yes | yes | yes |
| mexico | micrococcus yunnanensis       | Bacteria | no  | no  | no  |
| mexico | bacillus mojavenis            | Bacteria | no  | no  | no  |
| mexico | enterobacter aerogenes        | Bacteria | yes | yes | no  |
| mexico | bacillus endophyticus         | Bacteria | no  | no  | no  |
| mexico | pseudomonas aeruginosa        | Bacteria | yes | yes | yes |
| mexico | vibrio harveyi                | Bacteria | no  | no  | no  |
| mexico | rickettsia rickettsii         | Bacteria | yes | yes | no  |
| mexico | human papillomavirus 6        | Virus    | no  | no  | no  |
| mexico | oceanobacillus oncorhynchi    | Bacteria | no  | no  | no  |
| mexico | aeromonas hydrophila          | Bacteria | yes | yes | yes |
| mexico | human papillomavirus 53       | Virus    | no  | no  | no  |
| mexico | toxoplasma gondii             | Protozoa | yes | yes | yes |
| mexico | haplometrana intestinalis     | Helminth | no  | no  | no  |
| mexico | human herpesvirus 4           | Virus    | no  | no  | no  |
| mexico | haematoloechus parviplexus    | Helminth | no  | no  | no  |
| mexico | fusarium polyphialidicum      | Fungi    | no  | no  | no  |
| mexico | saccharomyces cerevisiae      | Fungi    | yes | no  | no  |
| mexico | pseudomonas poae              | Bacteria | no  | no  | no  |
| mexico | haliotrematoides plectridium  | Helminth | no  | no  | no  |
| mexico | haematoloechus meridionalis   | Helminth | no  | no  | no  |
| mexico | litobothrium janovyi          | Helminth | no  | no  | no  |
| mexico | human enterovirus b           | Virus    | yes | no  | yes |
| mexico | norwalk virus                 | Virus    | yes | no  | yes |
| mexico | fusarium falciforme           | Fungi    | no  | no  | no  |
| mexico | hepatitis a virus             | Virus    | yes | yes | yes |
| mexico | photobacterium damsela        | Bacteria | yes | yes | no  |
| mexico | mycobacterium peregrinum      | Bacteria | yes | no  | no  |
| mexico | pseudomonas fluorescens       | Bacteria | yes | no  | no  |

|        |                                        |          |     |     |     |
|--------|----------------------------------------|----------|-----|-----|-----|
| mexico | human astrovirus                       | Virus    | yes | no  | yes |
| mexico | vibrio splendidus                      | Bacteria | no  | no  | no  |
| mexico | candida humilis                        | Fungi    | no  | no  | no  |
| mexico | stenotrophomonas maltophilia           | Bacteria | no  | no  | no  |
| mexico | haliotrematoides spinatus              | Helminth | no  | no  | no  |
| mexico | haematoloechus danbrooksi              | Helminth | no  | no  | no  |
| mexico | pseudomonas anguilliseptica            | Bacteria | no  | no  | no  |
| mexico | geobacillus stearothermophilus         | Bacteria | no  | no  | no  |
| mexico | phyllostomum lacustri                  | Helminth | no  | no  | no  |
| mexico | microbacterium oxydans                 | Bacteria | no  | no  | no  |
| mexico | bacillus pumilus                       | Bacteria | yes | no  | no  |
| mexico | rabies virus                           | Virus    | yes | yes | yes |
| mexico | mycobacterium fortuitum                | Bacteria | no  | no  | no  |
| mexico | oligogonotylus mayae                   | Helminth | no  | no  | no  |
| mexico | measles virus                          | Virus    | yes | yes | yes |
| mexico | enterobacter cloacae                   | Bacteria | yes | yes | no  |
| mexico | sporothrix schenckii                   | Fungi    | yes | yes | no  |
| mexico | vibrio cholerae                        | Bacteria | yes | no  | yes |
| mexico | fusarium chlamyosporum                 | Fungi    | yes | no  | no  |
| mexico | microbacterium esteraromaticum         | Bacteria | no  | no  | no  |
| mexico | canine distemper virus                 | Virus    | no  | no  | no  |
| mexico | kluveromyces marxianus                 | Fungi    | no  | no  | no  |
| mexico | haematoloechus exoterorchis            | Helminth | no  | no  | no  |
| mexico | porcine reproductive and respiratory s | Virus    | no  | no  | no  |
| mexico | leishmania mexicana                    | Protozoa | yes | yes | no  |
| mexico | neomicrocotyle pacifica                | Helminth | no  | no  | no  |
| mexico | avian coronavirus                      | Virus    | no  | no  | no  |
| mexico | pseudomonas alcaligenes                | Bacteria | yes | no  | no  |
| mexico | vibrio fortis                          | Bacteria | no  | no  | no  |
| mexico | classical swine fever virus            | Virus    | no  | no  | no  |
| mexico | infectious pancreatic necrosis virus   | Virus    | no  | no  | no  |
| mexico | mycobacterium ulcerans                 | Bacteria | yes | yes | yes |
| mexico | monticellia ophisterni                 | Helminth | no  | no  | no  |
| mexico | botryosphaeria rhodina                 | Fungi    | no  | no  | no  |
| mexico | bordetella bronchiseptica              | Bacteria | yes | yes | no  |
| mexico | venezuelan equine encephalitis virus   | Virus    | yes | yes | yes |
| mexico | escherichia coli                       | Bacteria | yes | yes | yes |
| mexico | human papillomavirus 18                | Virus    | no  | no  | no  |
| mexico | lactobacillus helveticus               | Bacteria | no  | no  | no  |
| mexico | colletotrichum dematium                | Fungi    | yes | no  | no  |
| mexico | pseudomonas putida                     | Bacteria | yes | no  | no  |
| mexico | microbacterium paraoxydans             | Bacteria | no  | no  | no  |
| mexico | haliotrematoides guttati               | Helminth | no  | no  | no  |
| mexico | staphylococcus aureus                  | Bacteria | yes | yes | yes |
| mexico | oligogonotylus manteri                 | Helminth | no  | no  | no  |
| mexico | brucella melitensis                    | Bacteria | yes | yes | yes |
| mexico | gallibacterium anatis                  | Bacteria | no  | no  | no  |
| mexico | delftia tsuruhatensis                  | Bacteria | no  | no  | no  |
| mexico | giardia intestinalis                   | Protozoa | no  | no  | no  |
| mexico | thausioscolex didelphidis              | Helminth | no  | no  | no  |

|            |                                |          |     |     |     |
|------------|--------------------------------|----------|-----|-----|-----|
| mexico     | cryptococcus gattii            | Fungi    | no  | no  | no  |
| mexico     | langeronia macrocirra          | Helminth | no  | no  | no  |
| mexico     | hyphopichia burtonii           | Fungi    | no  | no  | no  |
| mexico     | clavispora lusitaniae          | Fungi    | no  | no  | no  |
| mexico     | acremonium strictum            | Fungi    | yes | no  | no  |
| mexico     | coccidioides posadasii         | Fungi    | no  | no  | no  |
| mexico     | influenza b virus              | Virus    | yes | yes | no  |
| mexico     | rauschiella tineri             | Helminth | no  | no  | no  |
| mexico     | sapporo virus                  | Virus    | no  | no  | no  |
| mexico     | bacillus firmus                | Bacteria | no  | no  | no  |
| mexico     | lactobacillus plantarum        | Bacteria | no  | no  | no  |
| mexico     | mycobacterium tuberculosis     | Bacteria | yes | yes | yes |
| mexico     | meyerozyma guilliermondii      | Fungi    | no  | no  | no  |
| mexico     | enterobacter ludwigii          | Bacteria | no  | no  | no  |
| mexico     | fusarium sacchari              | Fungi    | yes | no  | no  |
| mexico     | coccidioides immitis           | Fungi    | yes | yes | yes |
| mexico     | penicillium marneffeii         | Fungi    | yes | yes | yes |
| mexico     | staphylococcus pasteurii       | Bacteria | no  | no  | no  |
| mexico     | treponema pallidum             | Bacteria | yes | no  | yes |
| mexico     | mouse mammary tumor virus      | Virus    | no  | no  | no  |
| mexico     | acinetobacter junii            | Bacteria | yes | no  | no  |
| mexico     | onchocerca volvulus            | Helminth | yes | yes | yes |
| mexico     | dengue virus                   | Virus    | no  | no  | no  |
| mexico     | hymenolepis nana               | Helminth | yes | yes | no  |
| mexico     | fusarium subglutinans          | Fungi    | yes | no  | no  |
| mexico     | taenia asiatica                | Helminth | no  | no  | no  |
| mexico     | photobacterium leiognathi      | Bacteria | no  | no  | no  |
| mexico     | bacillus licheniformis         | Bacteria | yes | yes | no  |
| mexico     | influenza a virus              | Virus    | yes | yes | yes |
| mexico     | rhodotorula mucilaginosa       | Fungi    | yes | yes | no  |
| mexico     | burkholderia gladioli          | Bacteria | no  | no  | no  |
| mexico     | acinetobacter johnsonii        | Bacteria | yes | no  | no  |
| mexico     | brevundimonas vesicularis      | Bacteria | yes | no  | no  |
| micronesia | dengue virus                   | Virus    | no  | no  | no  |
| micronesia | jc polyomavirus                | Virus    | no  | no  | no  |
| micronesia | human immunodeficiency virus 2 | Virus    | yes | no  | yes |
| micronesia | human immunodeficiency virus 1 | Virus    | yes | no  | yes |
| micronesia | candida albicans               | Fungi    | yes | yes | yes |
| micronesia | hepatitis b virus              | Virus    | yes | no  | yes |
| micronesia | vibrio cholerae                | Bacteria | yes | no  | yes |
| micronesia | escherichia coli               | Bacteria | yes | yes | yes |
| moldova    | spring viraemia of carp virus  | Virus    | no  | no  | no  |
| moldova    | measles virus                  | Virus    | yes | yes | yes |
| moldova    | human enterovirus b            | Virus    | yes | no  | yes |
| mongolia   | human astrovirus               | Virus    | yes | no  | yes |
| mongolia   | bk polyomavirus                | Virus    | no  | no  | no  |
| mongolia   | hepatitis delta virus          | Virus    | yes | no  | no  |
| mongolia   | leishmania turanica            | Protozoa | no  | no  | no  |
| mongolia   | hepatitis c virus              | Virus    | yes | no  | yes |
| mongolia   | influenza a virus              | Virus    | yes | yes | yes |



|            |                                     |          |     |     |     |
|------------|-------------------------------------|----------|-----|-----|-----|
| mongolia   | sapporo virus                       | Virus    | no  | no  | no  |
| mongolia   | tick-borne encephalitis virus       | Virus    | no  | no  | no  |
| mongolia   | cytauzoon manul                     | Protozoa | no  | no  | no  |
| mongolia   | alphacoronavirus 1                  | Virus    | no  | no  | no  |
| mongolia   | human enterovirus b                 | Virus    | yes | no  | yes |
| mongolia   | haemonchus contortus                | Helminth | yes | yes | no  |
| mongolia   | human enterovirus a                 | Virus    | yes | no  | no  |
| mongolia   | hepatitis b virus                   | Virus    | yes | no  | yes |
| mongolia   | human herpesvirus 3                 | Virus    | no  | no  | no  |
| mongolia   | rubella virus                       | Virus    | yes | no  | no  |
| mongolia   | theileria orientalis                | Protozoa | no  | no  | no  |
| mongolia   | echinococcus multilocularis         | Helminth | yes | yes | no  |
| mongolia   | human immunodeficiency virus 1      | Virus    | yes | no  | yes |
| mongolia   | human enterovirus c                 | Virus    | yes | no  | no  |
| mongolia   | jc polyomavirus                     | Virus    | no  | no  | no  |
| mongolia   | norwalk virus                       | Virus    | yes | no  | yes |
| mongolia   | anaplasma marginale                 | Bacteria | no  | no  | no  |
| mongolia   | rabies virus                        | Virus    | yes | yes | yes |
| mongolia   | yersinia pestis                     | Bacteria | yes | yes | yes |
| mongolia   | babesia ovata                       | Protozoa | no  | no  | no  |
| montserrat | dengue virus                        | Virus    | no  | no  | no  |
| montserrat | human immunodeficiency virus 1      | Virus    | yes | no  | yes |
| morocco    | hepatitis c virus                   | Virus    | yes | no  | yes |
| morocco    | rotavirus a                         | Virus    | yes | yes | yes |
| morocco    | staphylococcus warneri              | Bacteria | yes | yes | no  |
| morocco    | burkholderia fungorum               | Bacteria | no  | no  | no  |
| morocco    | agrobacterium rhizogenes            | Bacteria | no  | no  | no  |
| morocco    | micrococcus luteus                  | Bacteria | no  | no  | no  |
| morocco    | cordyceps bassiana                  | Fungi    | no  | no  | no  |
| morocco    | bluetongue virus                    | Virus    | no  | no  | no  |
| morocco    | human adenovirus f                  | Virus    | yes | no  | no  |
| morocco    | bacillus flexus                     | Bacteria | no  | no  | no  |
| morocco    | human immunodeficiency virus 1      | Virus    | yes | no  | yes |
| morocco    | bacillus thioeparans                | Bacteria | no  | no  | no  |
| morocco    | agrobacterium tumefaciens           | Bacteria | no  | no  | no  |
| morocco    | oerskovia turbata                   | Bacteria | no  | no  | no  |
| morocco    | rabies virus                        | Virus    | yes | yes | yes |
| morocco    | human adenovirus c                  | Virus    | yes | no  | no  |
| morocco    | human papillomavirus 53             | Virus    | no  | no  | no  |
| morocco    | staphylococcus sciuri               | Bacteria | no  | no  | no  |
| morocco    | heligmosomoides polygyrus           | Helminth | no  | no  | no  |
| morocco    | peste-des-petits-ruminants virus    | Virus    | no  | no  | no  |
| morocco    | vibrio alginolyticus                | Bacteria | yes | yes | no  |
| morocco    | human adenovirus d                  | Virus    | yes | no  | no  |
| morocco    | human enterovirus b                 | Virus    | yes | no  | yes |
| morocco    | leishmania major                    | Protozoa | yes | yes | no  |
| morocco    | escherichia coli                    | Bacteria | yes | yes | yes |
| morocco    | schizophyllum commune               | Fungi    | yes | no  | no  |
| morocco    | human adenovirus b                  | Virus    | yes | no  | no  |
| morocco    | epizootic hemorrhagic disease virus | Virus    | no  | no  | no  |

|            |                                |          |     |     |     |
|------------|--------------------------------|----------|-----|-----|-----|
| morocco    | rahnella aquatilis             | Bacteria | yes | no  | no  |
| morocco    | jc polyomavirus                | Virus    | no  | no  | no  |
| morocco    | neisseria meningitidis         | Bacteria | yes | no  | yes |
| morocco    | measles virus                  | Virus    | yes | yes | yes |
| morocco    | borrelia burgdorferi           | Bacteria | yes | yes | yes |
| morocco    | borrelia lusitaniae            | Bacteria | no  | no  | no  |
| morocco    | stenotrophomonas maltophilia   | Bacteria | no  | no  | no  |
| morocco    | aeromonas hydrophila           | Bacteria | yes | yes | yes |
| morocco    | bacillus pumilus               | Bacteria | yes | no  | no  |
| morocco    | bacillus megaterium            | Bacteria | no  | no  | no  |
| morocco    | foot-and-mouth disease virus   | Virus    | no  | no  | no  |
| morocco    | theileria annulata             | Protozoa | no  | no  | no  |
| morocco    | hepatitis e virus              | Virus    | yes | yes | yes |
| morocco    | kluveromyces marxianus         | Fungi    | no  | no  | no  |
| morocco    | mycobacterium tuberculosis     | Bacteria | yes | yes | yes |
| morocco    | hepatitis a virus              | Virus    | yes | yes | yes |
| morocco    | hepatitis b virus              | Virus    | yes | no  | yes |
| morocco    | human enterovirus c            | Virus    | yes | no  | no  |
| morocco    | pseudomonas aeruginosa         | Bacteria | yes | yes | yes |
| morocco    | enterobacter cancerogenus      | Bacteria | yes | yes | no  |
| morocco    | leishmania tropica             | Protozoa | yes | yes | no  |
| morocco    | west nile virus                | Virus    | yes | yes | yes |
| mozambique | aspergillus niger              | Fungi    | yes | yes | no  |
| mozambique | primate t-lymphotropic virus 1 | Virus    | no  | no  | no  |
| mozambique | african swine fever virus      | Virus    | no  | no  | no  |
| mozambique | torque teno sus virus 1        | Virus    | no  | no  | no  |
| mozambique | plasmodium falciparum          | Protozoa | yes | no  | yes |
| mozambique | bacillus licheniformis         | Bacteria | yes | yes | no  |
| mozambique | plasmodium vivax               | Protozoa | yes | no  | yes |
| mozambique | penicillium citrinum           | Fungi    | yes | no  | no  |
| mozambique | human immunodeficiency virus 2 | Virus    | yes | no  | yes |
| mozambique | human immunodeficiency virus 1 | Virus    | yes | no  | yes |
| mozambique | fonsecaea pedrosoi             | Fungi    | no  | no  | no  |
| mozambique | bacillus circulans             | Bacteria | yes | no  | no  |
| mozambique | bacillus cereus                | Bacteria | yes | yes | no  |
| mozambique | bacillus coagulans             | Bacteria | yes | yes | no  |
| mozambique | aspergillus flavus             | Fungi    | no  | no  | no  |
| mozambique | measles virus                  | Virus    | yes | yes | yes |
| mozambique | bacillus thuringiensis         | Bacteria | yes | no  | no  |
| mozambique | dengue virus                   | Virus    | no  | no  | no  |
| mozambique | treponema pallidum             | Bacteria | yes | no  | yes |
| mozambique | trypanosoma vivax              | Protozoa | no  | no  | no  |
| mozambique | foot-and-mouth disease virus   | Virus    | no  | no  | no  |
| mozambique | aspergillus tubingensis        | Fungi    | no  | no  | no  |
| mozambique | torque teno sus virus 2        | Virus    | no  | no  | no  |
| myanmar    | plasmodium falciparum          | Protozoa | yes | no  | yes |
| myanmar    | bk polyomavirus                | Virus    | no  | no  | no  |
| myanmar    | burkholderia mallei            | Bacteria | yes | yes | no  |
| myanmar    | bacillus subtilis              | Bacteria | yes | yes | no  |
| myanmar    | rubella virus                  | Virus    | yes | no  | no  |

|         |                                       |          |     |     |     |
|---------|---------------------------------------|----------|-----|-----|-----|
| myanmar | japanese encephalitis virus           | Virus    | yes | yes | yes |
| myanmar | rotavirus b                           | Virus    | yes | yes | yes |
| myanmar | plasmodium ovale                      | Protozoa | yes | no  | no  |
| myanmar | cochliobolus geniculatus              | Fungi    | no  | no  | no  |
| myanmar | influenza a virus                     | Virus    | yes | yes | yes |
| myanmar | newcastle disease virus               | Virus    | yes | yes | no  |
| myanmar | wickerhamomyces anomalus              | Fungi    | no  | no  | no  |
| myanmar | staphylococcus aureus                 | Bacteria | yes | yes | yes |
| myanmar | jc polyomavirus                       | Virus    | no  | no  | no  |
| myanmar | foot-and-mouth disease virus          | Virus    | no  | no  | no  |
| myanmar | dengue virus                          | Virus    | no  | no  | no  |
| myanmar | mycobacterium tuberculosis            | Bacteria | yes | yes | yes |
| myanmar | hepatitis c virus                     | Virus    | yes | no  | yes |
| myanmar | fasciola gigantica                    | Helminth | yes | yes | no  |
| myanmar | saccharomyces cerevisiae              | Fungi    | yes | no  | no  |
| myanmar | pichia kudriavzevii                   | Fungi    | no  | no  | no  |
| myanmar | hepatitis b virus                     | Virus    | yes | no  | yes |
| myanmar | plasmodium vivax                      | Protozoa | yes | no  | yes |
| myanmar | rotavirus a                           | Virus    | yes | yes | yes |
| myanmar | plasmodium malariae                   | Protozoa | yes | yes | no  |
| myanmar | human immunodeficiency virus 1        | Virus    | yes | no  | yes |
| namibia | echinococcus equinus                  | Helminth | no  | no  | no  |
| namibia | measles virus                         | Virus    | yes | yes | yes |
| namibia | rift valley fever virus               | Virus    | yes | yes | yes |
| namibia | ehrlichia ruminantium                 | Bacteria | no  | no  | no  |
| namibia | botryosphaeria dothidea               | Fungi    | no  | no  | no  |
| namibia | hepatitis b virus                     | Virus    | yes | no  | yes |
| namibia | bacillus cereus                       | Bacteria | yes | yes | no  |
| namibia | xanthomonas campestris                | Bacteria | no  | no  | no  |
| namibia | crimean-congo hemorrhagic fever virus | Virus    | no  | no  | no  |
| namibia | rabies virus                          | Virus    | yes | yes | yes |
| namibia | saccharomyces cerevisiae              | Fungi    | yes | no  | no  |
| namibia | african swine fever virus             | Virus    | no  | no  | no  |
| namibia | hepatitis e virus                     | Virus    | yes | yes | yes |
| namibia | foot-and-mouth disease virus          | Virus    | no  | no  | no  |
| nepal   | infectious bursal disease virus       | Virus    | no  | no  | no  |
| nepal   | bacillus licheniformis                | Bacteria | yes | yes | no  |
| nepal   | shigella dysenteriae                  | Bacteria | yes | yes | yes |
| nepal   | mycobacterium fortuitum               | Bacteria | no  | no  | no  |
| nepal   | borrelia tanukii                      | Bacteria | no  | no  | no  |
| nepal   | hepatitis e virus                     | Virus    | yes | yes | yes |
| nepal   | bacillus pumilus                      | Bacteria | yes | no  | no  |
| nepal   | leuconostoc citreum                   | Bacteria | no  | no  | no  |
| nepal   | salmonella enterica                   | Bacteria | no  | no  | no  |
| nepal   | colletotrichum truncatum              | Fungi    | no  | no  | no  |
| nepal   | pichia kudriavzevii                   | Fungi    | no  | no  | no  |
| nepal   | taenia saginata                       | Helminth | yes | yes | no  |
| nepal   | ascaris lumbricoides                  | Helminth | yes | yes | no  |
| nepal   | neisseria meningitidis                | Bacteria | yes | no  | yes |
| nepal   | streptococcus pyogenes                | Bacteria | yes | yes | yes |

|             |                                  |          |     |     |     |
|-------------|----------------------------------|----------|-----|-----|-----|
| nepal       | cyclospora cayetanensis          | Protozoa | yes | yes | yes |
| nepal       | foot-and-mouth disease virus     | Virus    | no  | no  | no  |
| nepal       | hepatitis b virus                | Virus    | yes | no  | yes |
| nepal       | streptococcus pneumoniae         | Bacteria | yes | yes | yes |
| nepal       | xanthomonas campestris           | Bacteria | no  | no  | no  |
| nepal       | entamoeba nuttalli               | Protozoa | no  | no  | no  |
| nepal       | mycobacterium bovis              | Bacteria | yes | yes | yes |
| nepal       | echinococcus granulosus          | Helminth | yes | yes | yes |
| nepal       | human enterovirus c              | Virus    | yes | no  | no  |
| nepal       | taenia solium                    | Helminth | yes | no  | yes |
| nepal       | classical swine fever virus      | Virus    | no  | no  | no  |
| nepal       | cryptosporidium parvum           | Protozoa | yes | yes | yes |
| nepal       | measles virus                    | Virus    | yes | yes | yes |
| nepal       | peste-des-petits-ruminants virus | Virus    | no  | no  | no  |
| nepal       | borrelia valaisiana              | Bacteria | no  | no  | no  |
| nepal       | staphylococcus aureus            | Bacteria | yes | yes | yes |
| nepal       | hepatitis c virus                | Virus    | yes | no  | yes |
| nepal       | human immunodeficiency virus 2   | Virus    | yes | no  | yes |
| nepal       | rabies virus                     | Virus    | yes | yes | yes |
| nepal       | brevibacillus agri               | Bacteria | no  | no  | no  |
| nepal       | trichuris trichiura              | Helminth | yes | yes | no  |
| nepal       | thottapalayam virus              | Virus    | no  | no  | no  |
| nepal       | citrobacter freundii             | Bacteria | yes | yes | no  |
| nepal       | human immunodeficiency virus 1   | Virus    | yes | no  | yes |
| nepal       | escherichia coli                 | Bacteria | yes | yes | yes |
| nepal       | dengue virus                     | Virus    | no  | no  | no  |
| nepal       | mycobacterium thermoresistibile  | Bacteria | no  | no  | no  |
| nepal       | pestalotiopsis microspora        | Fungi    | no  | no  | no  |
| nepal       | rotavirus a                      | Virus    | yes | yes | yes |
| netherlands | neisseria gonorrhoeae            | Bacteria | yes | no  | yes |
| netherlands | echinococcus ortleppi            | Helminth | no  | no  | no  |
| netherlands | brachyspira pilosicoli           | Bacteria | no  | no  | no  |
| netherlands | measles virus                    | Virus    | yes | yes | yes |
| netherlands | staphylococcus hominis           | Bacteria | no  | no  | no  |
| netherlands | staphylococcus aureus            | Bacteria | yes | yes | yes |
| netherlands | streptococcus suis               | Bacteria | yes | yes | no  |
| netherlands | saccharomyces cerevisiae         | Fungi    | yes | no  | no  |
| netherlands | raoultella planticola            | Bacteria | no  | no  | no  |
| netherlands | gallid herpesvirus 2             | Virus    | no  | no  | no  |
| netherlands | taylorella equigenitalis         | Bacteria | no  | no  | no  |
| netherlands | cetacean morbillivirus           | Virus    | no  | no  | no  |
| netherlands | human adenovirus b               | Virus    | yes | no  | no  |
| netherlands | haemonchus contortus             | Helminth | yes | yes | no  |
| netherlands | neisseria lactamica              | Bacteria | yes | no  | no  |
| netherlands | mycobacterium avium              | Bacteria | yes | yes | yes |
| netherlands | bacillus pumilus                 | Bacteria | yes | no  | no  |
| netherlands | neisseria meningitidis           | Bacteria | yes | no  | yes |
| netherlands | micrococcus luteus               | Bacteria | no  | no  | no  |
| netherlands | torque teno sus virus 1          | Virus    | no  | no  | no  |
| netherlands | pseudomonas chlororaphis         | Bacteria | no  | no  | no  |

|             |                                        |          |     |     |     |
|-------------|----------------------------------------|----------|-----|-----|-----|
| netherlands | chicken astrovirus                     | Virus    | no  | no  | no  |
| netherlands | bacillus coagulans                     | Bacteria | yes | yes | no  |
| netherlands | klebsiella oxytoca                     | Bacteria | yes | yes | no  |
| netherlands | classical swine fever virus            | Virus    | no  | no  | no  |
| netherlands | bovine viral diarrhea virus 1          | Virus    | no  | no  | no  |
| netherlands | gyrodactylus rugiensoides              | Helminth | no  | no  | no  |
| netherlands | bacillus subtilis                      | Bacteria | yes | yes | no  |
| netherlands | plasmodium falciparum                  | Protozoa | yes | no  | yes |
| netherlands | human parvovirus b19                   | Virus    | no  | no  | no  |
| netherlands | human immunodeficiency virus 2         | Virus    | yes | no  | yes |
| netherlands | gyrodactylus branchialis               | Helminth | no  | no  | no  |
| netherlands | human immunodeficiency virus 1         | Virus    | yes | no  | yes |
| netherlands | bordetella pertussis                   | Bacteria | yes | no  | yes |
| netherlands | pseudomonas putida                     | Bacteria | yes | no  | no  |
| netherlands | streptococcus pneumoniae               | Bacteria | yes | yes | yes |
| netherlands | enterococcus faecium                   | Bacteria | yes | yes | yes |
| netherlands | schizophyllum commune                  | Fungi    | yes | no  | no  |
| netherlands | human enterovirus d                    | Virus    | yes | no  | no  |
| netherlands | geomyces destructans                   | Fungi    | no  | no  | no  |
| netherlands | bovine herpesvirus 1                   | Virus    | no  | no  | no  |
| netherlands | ochrobactrum intermedium               | Bacteria | no  | no  | no  |
| netherlands | fusarium solani                        | Fungi    | yes | yes | yes |
| netherlands | porcine reproductive and respiratory s | Virus    | no  | no  | no  |
| netherlands | collinsella aerofaciens                | Bacteria | yes | yes | no  |
| netherlands | rabies virus                           | Virus    | yes | yes | yes |
| netherlands | european bat lyssavirus 1              | Virus    | yes | yes | no  |
| netherlands | helicobacter pylori                    | Bacteria | yes | yes | no  |
| netherlands | human enterovirus c                    | Virus    | yes | no  | no  |
| netherlands | acinetobacter lwoffii                  | Bacteria | yes | no  | no  |
| netherlands | candida albicans                       | Fungi    | yes | yes | yes |
| netherlands | scedosporium apiospermum               | Fungi    | no  | no  | no  |
| netherlands | molluscum contagiosum virus            | Virus    | yes | no  | no  |
| netherlands | torque teno sus virus 2                | Virus    | no  | no  | no  |
| netherlands | human herpesvirus 8                    | Virus    | yes | no  | yes |
| netherlands | haemophilus influenzae                 | Bacteria | yes | no  | yes |
| netherlands | aspergillus carbonarius                | Fungi    | no  | no  | no  |
| netherlands | cryptococcus curvatus                  | Fungi    | no  | no  | no  |
| netherlands | angiostrongylus vasorum                | Helminth | no  | no  | no  |
| netherlands | actinobaculum schaalii                 | Bacteria | no  | no  | no  |
| netherlands | gyrodactylus gondae                    | Helminth | no  | no  | no  |
| netherlands | orchitophrya stellarum                 | Protozoa | no  | no  | no  |
| netherlands | human herpesvirus 1                    | Virus    | no  | no  | no  |
| netherlands | ophiostoma stenoceras                  | Fungi    | no  | no  | no  |
| netherlands | pseudomonas fluorescens                | Bacteria | yes | no  | no  |
| netherlands | microbacterium aurum                   | Bacteria | no  | no  | no  |
| netherlands | human coronavirus nl63                 | Virus    | no  | no  | no  |
| netherlands | brachyspira aalborgi                   | Bacteria | no  | no  | no  |
| netherlands | caprine herpesvirus 2                  | Virus    | no  | no  | no  |
| netherlands | chlamydia trachomatis                  | Bacteria | yes | yes | yes |
| netherlands | rothia mucilaginosa                    | Bacteria | no  | no  | no  |

|             |                                    |          |     |     |     |
|-------------|------------------------------------|----------|-----|-----|-----|
| netherlands | aspergillus awamori                | Fungi    | no  | no  | no  |
| netherlands | staphylococcus fleurettii          | Bacteria | no  | no  | no  |
| netherlands | elephantid herpesvirus 1           | Virus    | no  | no  | no  |
| netherlands | simian immunodeficiency virus      | Virus    | no  | no  | no  |
| netherlands | faecalibacterium prausnitzii       | Bacteria | no  | no  | no  |
| netherlands | enterobacter amnigenus             | Bacteria | yes | yes | no  |
| netherlands | human parechovirus                 | Virus    | no  | no  | no  |
| netherlands | klebsiella pneumoniae              | Bacteria | yes | yes | yes |
| netherlands | alphacoronavirus 1                 | Virus    | no  | no  | no  |
| netherlands | hepatitis a virus                  | Virus    | yes | yes | yes |
| netherlands | enterobacter cloacae               | Bacteria | yes | yes | no  |
| netherlands | gyrodactylus ostendicus            | Helminth | no  | no  | no  |
| netherlands | equine arteritis virus             | Virus    | no  | no  | no  |
| netherlands | hepatitis b virus                  | Virus    | yes | no  | yes |
| netherlands | arthroderma benhamiae              | Fungi    | no  | no  | no  |
| netherlands | babesia canis                      | Protozoa | no  | no  | no  |
| netherlands | borna disease virus                | Virus    | yes | yes | no  |
| netherlands | staphylococcus vitulinus           | Bacteria | no  | no  | no  |
| netherlands | clavospora lusitaniae              | Fungi    | no  | no  | no  |
| netherlands | human enterovirus a                | Virus    | yes | no  | no  |
| netherlands | staphylococcus equorum             | Bacteria | no  | no  | no  |
| netherlands | porcine torovirus                  | Virus    | no  | no  | no  |
| netherlands | cooperia oncophora                 | Helminth | no  | no  | no  |
| netherlands | debaryomyces hansenii              | Fungi    | no  | no  | no  |
| netherlands | bacteroides fragilis               | Bacteria | yes | yes | no  |
| netherlands | trichobilharzia szidati            | Helminth | no  | no  | no  |
| netherlands | bovine respiratory syncytial virus | Virus    | no  | no  | no  |
| netherlands | influenza a virus                  | Virus    | yes | yes | yes |
| netherlands | bacillus cereus                    | Bacteria | yes | yes | no  |
| netherlands | kluyveromyces marxianus            | Fungi    | no  | no  | no  |
| netherlands | foot-and-mouth disease virus       | Virus    | no  | no  | no  |
| netherlands | norwalk virus                      | Virus    | yes | no  | yes |
| netherlands | borrelia burgdorferi               | Bacteria | yes | yes | yes |
| netherlands | haemonchus placei                  | Helminth | no  | no  | no  |
| netherlands | malassezia furfur                  | Fungi    | yes | yes | no  |
| netherlands | mycobacterium bovis                | Bacteria | yes | yes | yes |
| netherlands | escherichia coli                   | Bacteria | yes | yes | yes |
| netherlands | raoultella terrigena               | Bacteria | no  | no  | no  |
| netherlands | human herpesvirus 5                | Virus    | yes | no  | yes |
| netherlands | staphylococcus epidermidis         | Bacteria | yes | yes | yes |
| netherlands | african swine fever virus          | Virus    | no  | no  | no  |
| netherlands | scedosporium dehoogii              | Fungi    | no  | no  | no  |
| netherlands | mycobacterium noviomagense         | Bacteria | no  | no  | no  |
| netherlands | mycobacterium xenopi               | Bacteria | yes | yes | no  |
| netherlands | human enterovirus b                | Virus    | yes | no  | yes |
| netherlands | toxoplasma gondii                  | Protozoa | yes | yes | yes |
| netherlands | babesia motasi                     | Protozoa | no  | no  | no  |
| netherlands | haemophilus parasuis               | Bacteria | no  | no  | no  |
| netherlands | staphylococcus pseudintermedius    | Bacteria | no  | no  | no  |
| netherlands | bacillus megaterium                | Bacteria | no  | no  | no  |

|               |                                 |          |     |     |     |
|---------------|---------------------------------|----------|-----|-----|-----|
| netherlands   | cladosporium cucumerinum        | Fungi    | no  | no  | no  |
| netherlands   | avibacterium paragallinarum     | Bacteria | no  | no  | no  |
| netherlands   | fusarium oxysporum              | Fungi    | yes | no  | yes |
| netherlands   | fusobacterium nucleatum         | Bacteria | yes | yes | no  |
| netherlands   | infectious bursal disease virus | Virus    | no  | no  | no  |
| netherlands   | bacillus circulans              | Bacteria | yes | no  | no  |
| netherlands   | human coronavirus 229e          | Virus    | yes | no  | no  |
| netherlands   | cladosporium cladosporioides    | Fungi    | yes | no  | no  |
| netherlands   | mucor circinelloides            | Fungi    | yes | yes | no  |
| netherlands   | mycoplasma pneumoniae           | Bacteria | yes | no  | no  |
| netherlands   | variovorax paradoxus            | Bacteria | no  | no  | no  |
| netherlands   | vaccinia virus                  | Virus    | no  | no  | no  |
| netherlands   | yersinia pestis                 | Bacteria | yes | yes | yes |
| netherlands   | staphylococcus haemolyticus     | Bacteria | yes | yes | no  |
| netherlands   | jc polyomavirus                 | Virus    | no  | no  | no  |
| netherlands   | cryptococcus gattii             | Fungi    | no  | no  | no  |
| netherlands   | cryptococcus neoformans         | Fungi    | yes | yes | yes |
| netherlands   | hepatitis c virus               | Virus    | yes | no  | yes |
| netherlands   | ovine herpesvirus 2             | Virus    | no  | no  | no  |
| netherlands   | human herpesvirus 2             | Virus    | no  | no  | no  |
| netherlands   | chlamydomyces psittaci          | Bacteria | yes | yes | no  |
| netherlands   | bacillus licheniformis          | Bacteria | yes | yes | no  |
| netherlands   | sporothrix schenckii            | Fungi    | yes | yes | no  |
| netherlands   | pseudomonas brenneri            | Bacteria | no  | no  | no  |
| netherlands   | candida inconspicua             | Fungi    | no  | no  | no  |
| netherlands   | european bat lyssavirus 2       | Virus    | yes | yes | no  |
| netherlands   | mesorhizobium loti              | Bacteria | no  | no  | no  |
| netherlands   | bovine torovirus                | Virus    | no  | no  | no  |
| netherlands   | monkeypox virus                 | Virus    | yes | yes | yes |
| netherlands   | sapporo virus                   | Virus    | no  | no  | no  |
| netherlands   | fasciola hepatica               | Helminth | yes | yes | no  |
| netherlands   | rhodococcus erythropolis        | Bacteria | yes | no  | no  |
| new caledonia | haplosporidium purii            | Helminth | no  | no  | no  |
| new caledonia | bartonella henselae             | Bacteria | yes | yes | no  |
| new caledonia | human herpesvirus 8             | Virus    | yes | no  | yes |
| new caledonia | bartonella chomelii             | Bacteria | no  | no  | no  |
| new caledonia | jc polyomavirus                 | Virus    | no  | no  | no  |
| new caledonia | leptospira borgpetersenii       | Bacteria | yes | yes | no  |
| new caledonia | human immunodeficiency virus 2  | Virus    | yes | no  | yes |
| new caledonia | cupriavidus taiwanensis         | Bacteria | no  | no  | no  |
| new caledonia | escherichia coli                | Bacteria | yes | yes | yes |
| new caledonia | vibrio penaeicida               | Bacteria | no  | no  | no  |
| new caledonia | streptococcus pneumoniae        | Bacteria | yes | yes | yes |
| new caledonia | hepatitis e virus               | Virus    | yes | yes | yes |
| new caledonia | dengue virus                    | Virus    | no  | no  | no  |
| new caledonia | influenza a virus               | Virus    | yes | yes | yes |
| new caledonia | cochliobolus geniculatus        | Fungi    | no  | no  | no  |
| new caledonia | human immunodeficiency virus 1  | Virus    | yes | no  | yes |
| new caledonia | leptospira interrogans          | Bacteria | yes | yes | yes |
| new caledonia | plasmodium falciparum           | Protozoa | yes | no  | yes |

|             |                                  |          |     |     |     |
|-------------|----------------------------------|----------|-----|-----|-----|
| new zealand | mycobacterium avium              | Bacteria | yes | yes | yes |
| new zealand | streptococcus pneumoniae         | Bacteria | yes | yes | yes |
| new zealand | pseudomonas fluorescens          | Bacteria | yes | no  | no  |
| new zealand | rabbit hemorrhagic disease virus | Virus    | no  | no  | no  |
| new zealand | hepatitis b virus                | Virus    | yes | no  | yes |
| new zealand | colletotrichum truncatum         | Fungi    | no  | no  | no  |
| new zealand | human enterovirus d              | Virus    | yes | no  | no  |
| new zealand | measles virus                    | Virus    | yes | yes | yes |
| new zealand | staphylococcus aureus            | Bacteria | yes | yes | yes |
| new zealand | lactobacillus plantarum          | Bacteria | no  | no  | no  |
| new zealand | hepatitis e virus                | Virus    | yes | yes | yes |
| new zealand | campylobacter jejuni             | Bacteria | yes | yes | yes |
| new zealand | pantoea agglomerans              | Bacteria | yes | yes | no  |
| new zealand | feline immunodeficiency virus    | Virus    | no  | no  | no  |
| new zealand | amurotaenia decidua              | Helminth | no  | no  | no  |
| new zealand | hammondia heydorni               | Protozoa | no  | no  | no  |
| new zealand | giardia intestinalis             | Protozoa | no  | no  | no  |
| new zealand | rotavirus a                      | Virus    | yes | yes | yes |
| new zealand | fowlpox virus                    | Virus    | no  | no  | no  |
| new zealand | cryptococcus gattii              | Fungi    | no  | no  | no  |
| new zealand | human immunodeficiency virus 1   | Virus    | yes | no  | yes |
| new zealand | schizophyllum commune            | Fungi    | yes | no  | no  |
| new zealand | naegleria fowleri                | Protozoa | yes | no  | no  |
| new zealand | human herpesvirus 8              | Virus    | yes | no  | yes |
| new zealand | helicobacter pylori              | Bacteria | yes | yes | no  |
| new zealand | feline papillomavirus            | Virus    | no  | no  | no  |
| new zealand | orf virus                        | Virus    | yes | yes | no  |
| new zealand | escherichia coli                 | Bacteria | yes | yes | yes |
| new zealand | taenia ovis                      | Helminth | no  | no  | no  |
| new zealand | beak and feather disease virus   | Virus    | no  | no  | no  |
| new zealand | cryptosporidium parvum           | Protozoa | yes | yes | yes |
| new zealand | elaphostrongylus cervi           | Helminth | no  | no  | no  |
| new zealand | saccharomyces cerevisiae         | Fungi    | yes | no  | no  |
| new zealand | pigmentiphaga daeguensis         | Bacteria | no  | no  | no  |
| new zealand | cordyceps bassiana               | Fungi    | no  | no  | no  |
| new zealand | norwalk virus                    | Virus    | yes | no  | yes |
| new zealand | infectious bursal disease virus  | Virus    | no  | no  | no  |
| new zealand | cryptosporidium hominis          | Protozoa | yes | no  | yes |
| new zealand | klebsiella pneumoniae            | Bacteria | yes | yes | yes |
| new zealand | neisseria meningitidis           | Bacteria | yes | no  | yes |
| new zealand | megamonas hypermegale            | Bacteria | yes | no  | no  |
| new zealand | human rhinovirus b               | Virus    | yes | no  | no  |
| new zealand | bovine viral diarrhea virus 1    | Virus    | no  | no  | no  |
| new zealand | borrelia bissettii               | Bacteria | no  | no  | no  |
| new zealand | xanthomonas campestris           | Bacteria | no  | no  | no  |
| new zealand | teladorsagia circumcincta        | Helminth | yes | yes | no  |
| new zealand | bartonella clarridgeiae          | Bacteria | no  | no  | no  |
| new zealand | streptococcus pyogenes           | Bacteria | yes | yes | yes |
| new zealand | neospora caninum                 | Protozoa | no  | no  | no  |
| new zealand | veillonella parvula              | Bacteria | yes | no  | no  |



|             |                                       |          |     |     |     |
|-------------|---------------------------------------|----------|-----|-----|-----|
| new zealand | cellulosimicrobium funkei             | Bacteria | no  | no  | no  |
| new zealand | hepatitis c virus                     | Virus    | yes | no  | yes |
| new zealand | copiatestes filiferus                 | Helminth | no  | no  | no  |
| new zealand | influenza a virus                     | Virus    | yes | yes | yes |
| new zealand | feline panleukopenia virus            | Virus    | no  | no  | no  |
| new zealand | ewingella americana                   | Bacteria | yes | no  | no  |
| new zealand | mesorhizobium loti                    | Bacteria | no  | no  | no  |
| new zealand | mycobacterium tuberculosis            | Bacteria | yes | yes | yes |
| new zealand | botryosphaeria dothidea               | Fungi    | no  | no  | no  |
| new zealand | clistobothrium carcharodoni           | Helminth | no  | no  | no  |
| new zealand | bacillus fordii                       | Bacteria | no  | no  | no  |
| new zealand | cryptosporidium canis                 | Protozoa | no  | no  | no  |
| new zealand | chlamydomyces pecorum                 | Bacteria | no  | no  | no  |
| new zealand | influenza b virus                     | Virus    | yes | yes | no  |
| new zealand | pestalotiopsis microspora             | Fungi    | no  | no  | no  |
| new zealand | arthroderma benhamiae                 | Fungi    | no  | no  | no  |
| new zealand | chlamydia trachomatis                 | Bacteria | yes | yes | yes |
| new zealand | ophiostoma stenoceras                 | Fungi    | no  | no  | no  |
| new zealand | canarypox virus                       | Virus    | no  | no  | no  |
| nicaragua   | cryptosporidium parvum                | Protozoa | yes | yes | yes |
| nicaragua   | colletotrichum truncatum              | Fungi    | no  | no  | no  |
| nicaragua   | treponema succinifaciens              | Bacteria | no  | no  | no  |
| nicaragua   | gibberella moniliformis               | Fungi    | no  | no  | no  |
| nicaragua   | escherichia coli                      | Bacteria | yes | yes | yes |
| nicaragua   | newcastle disease virus               | Virus    | yes | yes | no  |
| nicaragua   | botryosphaeria rhodina                | Fungi    | no  | no  | no  |
| nicaragua   | dengue virus                          | Virus    | no  | no  | no  |
| nicaragua   | hepatitis b virus                     | Virus    | yes | no  | yes |
| nicaragua   | influenza b virus                     | Virus    | yes | yes | no  |
| nicaragua   | human enterovirus c                   | Virus    | yes | no  | no  |
| nicaragua   | norwalk virus                         | Virus    | yes | no  | yes |
| nicaragua   | human respiratory syncytial virus     | Virus    | yes | no  | no  |
| nicaragua   | vesicular stomatitis new jersey virus | Virus    | no  | no  | no  |
| nicaragua   | influenza a virus                     | Virus    | yes | yes | yes |
| nicaragua   | plasmodium vivax                      | Protozoa | yes | no  | yes |
| nicaragua   | fusarium incarnatum                   | Fungi    | yes | no  | no  |
| nicaragua   | fusarium chlamydosporum               | Fungi    | yes | no  | no  |
| niger       | human enterovirus c                   | Virus    | yes | no  | no  |
| niger       | neisseria meningitidis                | Bacteria | yes | no  | yes |
| niger       | jc polyomavirus                       | Virus    | no  | no  | no  |
| niger       | plasmodium falciparum                 | Protozoa | yes | no  | yes |
| niger       | fasciola hepatica                     | Helminth | yes | yes | no  |
| niger       | human immunodeficiency virus 2        | Virus    | yes | no  | yes |
| niger       | measles virus                         | Virus    | yes | yes | yes |
| niger       | fasciola gigantica                    | Helminth | yes | yes | no  |
| niger       | human immunodeficiency virus 1        | Virus    | yes | no  | yes |
| niger       | hepatitis b virus                     | Virus    | yes | no  | yes |
| niger       | schistosoma haematobium               | Helminth | yes | yes | no  |
| niger       | bk polyomavirus                       | Virus    | no  | no  | no  |
| niger       | aureobasidium pullulans               | Fungi    | yes | no  | no  |

|         |                                  |          |     |     |     |
|---------|----------------------------------|----------|-----|-----|-----|
| nigeria | aspergillus niger                | Fungi    | yes | yes | no  |
| nigeria | pediococcus pentosaceus          | Bacteria | no  | no  | no  |
| nigeria | rabies virus                     | Virus    | yes | yes | yes |
| nigeria | human immunodeficiency virus 2   | Virus    | yes | no  | yes |
| nigeria | influenza a virus                | Virus    | yes | yes | yes |
| nigeria | yellow fever virus               | Virus    | yes | yes | yes |
| nigeria | cryptosporidium parvum           | Protozoa | yes | yes | yes |
| nigeria | dengue virus                     | Virus    | no  | no  | no  |
| nigeria | staphylococcus hominis           | Bacteria | no  | no  | no  |
| nigeria | haemophilus influenzae           | Bacteria | yes | no  | yes |
| nigeria | providencia rettgeri             | Bacteria | yes | yes | no  |
| nigeria | primate t-lymphotropic virus 2   | Virus    | no  | no  | no  |
| nigeria | entamoeba histolytica            | Protozoa | yes | yes | no  |
| nigeria | campylobacter fetus              | Bacteria | yes | yes | yes |
| nigeria | variola virus                    | Virus    | no  | no  | no  |
| nigeria | paecilomyces lilacinus           | Fungi    | yes | yes | no  |
| nigeria | human immunodeficiency virus 1   | Virus    | yes | no  | yes |
| nigeria | ehrlichia canis                  | Bacteria | no  | no  | no  |
| nigeria | rotavirus a                      | Virus    | yes | yes | yes |
| nigeria | peste-des-petits-ruminants virus | Virus    | no  | no  | no  |
| nigeria | neisseria gonorrhoeae            | Bacteria | yes | no  | yes |
| nigeria | vibrio cholerae                  | Bacteria | yes | no  | yes |
| nigeria | schizophyllum commune            | Fungi    | yes | no  | no  |
| nigeria | monkeypox virus                  | Virus    | yes | yes | yes |
| nigeria | salmonella enterica              | Bacteria | no  | no  | no  |
| nigeria | escherichia coli                 | Bacteria | yes | yes | yes |
| nigeria | nelson bay orthoreovirus         | Virus    | no  | no  | no  |
| nigeria | measles virus                    | Virus    | yes | yes | yes |
| nigeria | streptococcus gallolyticus       | Bacteria | no  | no  | no  |
| nigeria | burkholderia cepacia             | Bacteria | yes | no  | no  |
| nigeria | bacillus amyloliquefaciens       | Bacteria | no  | no  | no  |
| nigeria | newcastle disease virus          | Virus    | yes | yes | no  |
| nigeria | trichomonas vaginalis            | Protozoa | yes | no  | yes |
| nigeria | loa loa                          | Helminth | yes | yes | yes |
| nigeria | lassa virus                      | Virus    | yes | yes | yes |
| nigeria | human enterovirus b              | Virus    | yes | no  | yes |
| nigeria | plasmodium falciparum            | Protozoa | yes | no  | yes |
| nigeria | pseudomonas aeruginosa           | Bacteria | yes | yes | yes |
| nigeria | streptococcus pneumoniae         | Bacteria | yes | yes | yes |
| nigeria | lagos bat virus                  | Virus    | no  | no  | no  |
| nigeria | trypanosoma brucei               | Protozoa | yes | yes | yes |
| nigeria | trypanosoma vivax                | Protozoa | no  | no  | no  |
| nigeria | schistosoma haematobium          | Helminth | yes | yes | no  |
| nigeria | aspergillus flavus               | Fungi    | no  | no  | no  |
| nigeria | primate t-lymphotropic virus 1   | Virus    | no  | no  | no  |
| nigeria | enterococcus gallinarum          | Bacteria | yes | no  | no  |
| nigeria | serratia marcescens              | Bacteria | yes | yes | yes |
| nigeria | enterococcus faecium             | Bacteria | yes | yes | yes |
| nigeria | shigella flexneri                | Bacteria | yes | yes | no  |
| nigeria | lactobacillus fermentum          | Bacteria | no  | no  | no  |

|                          |                                       |          |     |     |     |
|--------------------------|---------------------------------------|----------|-----|-----|-----|
| nigeria                  | enterococcus casseliflavus            | Bacteria | yes | no  | no  |
| nigeria                  | hepatitis b virus                     | Virus    | yes | no  | yes |
| nigeria                  | candida albicans                      | Fungi    | yes | yes | yes |
| nigeria                  | african swine fever virus             | Virus    | no  | no  | no  |
| nigeria                  | alcaligenes faecalis                  | Bacteria | no  | no  | no  |
| nigeria                  | vibrio parahaemolyticus               | Bacteria | yes | yes | yes |
| nigeria                  | fusarium oxysporum                    | Fungi    | yes | no  | yes |
| nigeria                  | klebsiella pneumoniae                 | Bacteria | yes | yes | yes |
| nigeria                  | mumps virus                           | Virus    | yes | no  | no  |
| nigeria                  | proteus mirabilis                     | Bacteria | yes | yes | no  |
| nigeria                  | bluetongue virus                      | Virus    | no  | no  | no  |
| nigeria                  | plasmodium ovale                      | Protozoa | yes | no  | no  |
| nigeria                  | shamonda virus                        | Virus    | no  | no  | no  |
| nigeria                  | enterococcus faecalis                 | Bacteria | yes | yes | yes |
| nigeria                  | trichuris trichiura                   | Helminth | yes | yes | no  |
| nigeria                  | plasmodium yoelii                     | Protozoa | no  | no  | no  |
| nigeria                  | bacillus subtilis                     | Bacteria | yes | yes | no  |
| nigeria                  | schistosoma mansoni                   | Helminth | yes | yes | yes |
| nigeria                  | human herpesvirus 2                   | Virus    | no  | no  | no  |
| nigeria                  | bacillus pumilus                      | Bacteria | yes | no  | no  |
| nigeria                  | entamoeba coli                        | Protozoa | no  | no  | no  |
| nigeria                  | hepatitis c virus                     | Virus    | yes | no  | yes |
| nigeria                  | campylobacter jejuni                  | Bacteria | yes | yes | yes |
| nigeria                  | human enterovirus a                   | Virus    | yes | no  | no  |
| nigeria                  | ascaris lumbricoides                  | Helminth | yes | yes | no  |
| nigeria                  | human parvovirus b19                  | Virus    | no  | no  | no  |
| nigeria                  | foot-and-mouth disease virus          | Virus    | no  | no  | no  |
| nigeria                  | west nile virus                       | Virus    | yes | yes | yes |
| nigeria                  | ajellomyces capsulatus                | Fungi    | no  | no  | no  |
| nigeria                  | infectious bursal disease virus       | Virus    | no  | no  | no  |
| nigeria                  | chicken anemia virus                  | Virus    | no  | no  | no  |
| nigeria                  | lactobacillus plantarum               | Bacteria | no  | no  | no  |
| nigeria                  | mycobacterium tuberculosis            | Bacteria | yes | yes | yes |
| nigeria                  | simian immunodeficiency virus         | Virus    | no  | no  | no  |
| nigeria                  | staphylococcus aureus                 | Bacteria | yes | yes | yes |
| nigeria                  | crimean-congo hemorrhagic fever virus | Virus    | no  | no  | no  |
| nigeria                  | staphylococcus sciuri                 | Bacteria | no  | no  | no  |
| nigeria                  | chikungunya virus                     | Virus    | yes | yes | yes |
| nigeria                  | human enterovirus c                   | Virus    | yes | no  | no  |
| nigeria                  | onchocerca volvulus                   | Helminth | yes | yes | yes |
| niue                     | dengue virus                          | Virus    | no  | no  | no  |
| north korea              | plasmodium vivax                      | Protozoa | yes | no  | yes |
| north korea              | seoul virus                           | Virus    | yes | yes | yes |
| northern mariana islands | influenza a virus                     | Virus    | yes | yes | yes |
| northern mariana islands | influenza b virus                     | Virus    | yes | yes | no  |
| norway                   | chlamydia trachomatis                 | Bacteria | yes | yes | yes |
| norway                   | aliivibrio wodanis                    | Bacteria | no  | no  | no  |
| norway                   | influenza a virus                     | Virus    | yes | yes | yes |
| norway                   | actinobacillus arthritidis            | Bacteria | no  | no  | no  |
| norway                   | lactobacillus sakei                   | Bacteria | no  | no  | no  |

|        |                                        |          |     |     |     |
|--------|----------------------------------------|----------|-----|-----|-----|
| norway | helicobacter pylori                    | Bacteria | yes | yes | no  |
| norway | sarcocystis ovalis                     | Protozoa | no  | no  | no  |
| norway | spironucleus barkhanus                 | Protozoa | no  | no  | no  |
| norway | sarcocystis tarandi                    | Protozoa | no  | no  | no  |
| norway | infectious salmon anemia virus         | Virus    | no  | no  | no  |
| norway | mycobacterium tuberculosis             | Bacteria | yes | yes | yes |
| norway | campylobacter jejuni                   | Bacteria | yes | yes | yes |
| norway | schistocephalus solidus                | Helminth | yes | yes | no  |
| norway | influenza b virus                      | Virus    | yes | yes | no  |
| norway | bk polyomavirus                        | Virus    | no  | no  | no  |
| norway | trichinella nativa                     | Helminth | yes | yes | no  |
| norway | ophiostoma stenoceras                  | Fungi    | no  | no  | no  |
| norway | streptococcus pneumoniae               | Bacteria | yes | yes | yes |
| norway | gyrodactylus salaris                   | Helminth | no  | no  | no  |
| norway | budgerigar fledgling disease polyomavi | Virus    | no  | no  | no  |
| norway | actinobacillus rossii                  | Bacteria | no  | no  | no  |
| norway | calicotyle affinis                     | Helminth | no  | no  | no  |
| norway | anisakis simplex                       | Helminth | yes | yes | yes |
| norway | pleistophora hippoglossoideos          | Fungi    | no  | no  | no  |
| norway | brachyspira pulli                      | Bacteria | no  | no  | no  |
| norway | actinobacillus equuli                  | Bacteria | yes | yes | no  |
| norway | gyrodactylus gondae                    | Helminth | no  | no  | no  |
| norway | spironucleus salmonicida               | Protozoa | no  | no  | no  |
| norway | gyrodactylus rarus                     | Helminth | no  | no  | no  |
| norway | bluetongue virus                       | Virus    | no  | no  | no  |
| norway | rabies virus                           | Virus    | yes | yes | yes |
| norway | caprine arthritis encephalitis virus   | Virus    | no  | no  | no  |
| norway | neisseria gonorrhoeae                  | Bacteria | yes | no  | yes |
| norway | human immunodeficiency virus 1         | Virus    | yes | no  | yes |
| norway | renibacterium salmoninarum             | Bacteria | no  | no  | no  |
| norway | staphylococcus haemolyticus            | Bacteria | yes | yes | no  |
| norway | viral hemorrhagic septicemia virus     | Virus    | no  | no  | no  |
| norway | ichthyobodo necator                    | Protozoa | no  | no  | no  |
| norway | pseudocowpox virus                     | Virus    | yes | yes | no  |
| norway | moritella viscosa                      | Bacteria | no  | no  | no  |
| norway | gyrodactylus thymalli                  | Helminth | no  | no  | no  |
| norway | cryptosporidium parvum                 | Protozoa | yes | yes | yes |
| norway | escherichia coli                       | Bacteria | yes | yes | yes |
| norway | anaplasma phagocytophilum              | Bacteria | no  | no  | no  |
| norway | aliivibrio logei                       | Bacteria | no  | no  | no  |
| norway | hepatitis a virus                      | Virus    | yes | yes | yes |
| norway | gyrodactylus arcuatooides              | Helminth | no  | no  | no  |
| norway | candida aaseri                         | Fungi    | no  | no  | no  |
| norway | nucleospora salmonis                   | Fungi    | no  | no  | no  |
| norway | gyrocotyle urna                        | Helminth | no  | no  | no  |
| norway | vibrio splendidus                      | Bacteria | no  | no  | no  |
| norway | fusarium solani                        | Fungi    | yes | yes | yes |
| norway | measles virus                          | Virus    | yes | yes | yes |
| norway | aeromonas salmonicida                  | Bacteria | no  | no  | no  |
| norway | brachyspira aalborgi                   | Bacteria | no  | no  | no  |

|        |                                      |          |     |     |     |
|--------|--------------------------------------|----------|-----|-----|-----|
| norway | sarcocystis rangiferi                | Protozoa | no  | no  | no  |
| norway | piscirickettsia salmonis             | Bacteria | no  | no  | no  |
| norway | human immunodeficiency virus 2       | Virus    | yes | no  | yes |
| norway | rahnella aquatilis                   | Bacteria | yes | no  | no  |
| norway | pasteurella mairii                   | Bacteria | no  | no  | no  |
| norway | streptococcus pyogenes               | Bacteria | yes | yes | yes |
| norway | mannheimia haemolytica               | Bacteria | no  | no  | no  |
| norway | gyrodactylus flesi                   | Helminth | no  | no  | no  |
| norway | gyrodactylus flavescens              | Helminth | no  | no  | no  |
| norway | mannheimia varigena                  | Bacteria | no  | no  | no  |
| norway | penicillium polonicum                | Fungi    | no  | no  | no  |
| norway | pasteurella dagmatis                 | Bacteria | yes | yes | no  |
| norway | torque teno sus virus 2              | Virus    | no  | no  | no  |
| norway | neisseria meningitidis               | Bacteria | yes | no  | yes |
| norway | staphylococcus pasteurii             | Bacteria | no  | no  | no  |
| norway | equine arteritis virus               | Virus    | no  | no  | no  |
| norway | hammondia truffittae                 | Protozoa | no  | no  | no  |
| norway | infectious pancreatic necrosis virus | Virus    | no  | no  | no  |
| norway | cowpox virus                         | Virus    | yes | yes | no  |
| norway | sarcocystis hardangeri               | Protozoa | no  | no  | no  |
| norway | staphylococcus aureus                | Bacteria | yes | yes | yes |
| norway | salmon pancreas disease virus        | Virus    | no  | no  | no  |
| norway | brachyspira canis                    | Bacteria | no  | no  | no  |
| norway | bacillus cereus                      | Bacteria | yes | yes | no  |
| norway | moraxella nonliquefaciens            | Bacteria | yes | no  | no  |
| norway | staphylococcus pseudintermedius      | Bacteria | no  | no  | no  |
| norway | sarcocystis hjorti                   | Protozoa | no  | no  | no  |
| norway | bibersteinia trehalosi               | Bacteria | no  | no  | no  |
| norway | torque teno sus virus 1              | Virus    | no  | no  | no  |
| norway | lawsonia intracellularis             | Bacteria | no  | no  | no  |
| norway | enterococcus gallinarum              | Bacteria | yes | no  | no  |
| norway | chlamydomphila psittaci              | Bacteria | yes | yes | no  |
| norway | enterococcus faecium                 | Bacteria | yes | yes | yes |
| norway | brachyspira pilosicoli               | Bacteria | no  | no  | no  |
| norway | paranucleospora theridion            | Fungi    | no  | no  | no  |
| norway | nematodirus battus                   | Helminth | no  | no  | no  |
| norway | norwalk virus                        | Virus    | yes | no  | yes |
| norway | photobacterium iliopiscarium         | Bacteria | no  | no  | no  |
| norway | staphylococcus warneri               | Bacteria | yes | yes | no  |
| norway | acinetobacter baumannii              | Bacteria | yes | no  | no  |
| norway | pasteurella multocida                | Bacteria | yes | yes | no  |
| norway | yersinia enterocolitica              | Bacteria | yes | yes | yes |
| norway | aeromonas hydrophila                 | Bacteria | yes | yes | yes |
| norway | orf virus                            | Virus    | yes | yes | no  |
| norway | haemophilus influenzae               | Bacteria | yes | no  | yes |
| norway | hepatitis b virus                    | Virus    | yes | no  | yes |
| norway | candida intermedia                   | Fungi    | yes | no  | no  |
| norway | listeria monocytogenes               | Bacteria | yes | yes | yes |
| norway | paranoplocephala fellmani            | Helminth | no  | no  | no  |
| norway | clostridium perfringens              | Bacteria | yes | yes | no  |

|          |                                       |          |     |     |     |
|----------|---------------------------------------|----------|-----|-----|-----|
| norway   | <i>pasteurella caballi</i>            | Bacteria | yes | yes | no  |
| norway   | avian coronavirus                     | Virus    | no  | no  | no  |
| norway   | <i>chimaerohemecus trondheimensis</i> | Helminth | no  | no  | no  |
| norway   | <i>pasteurella canis</i>              | Bacteria | yes | yes | no  |
| oman     | <i>setosphaeria rostrata</i>          | Fungi    | yes | no  | no  |
| oman     | rabies virus                          | Virus    | yes | yes | yes |
| oman     | <i>trichophyton mentagrophytes</i>    | Fungi    | yes | yes | no  |
| oman     | <i>cladosporium sphaerospermum</i>    | Fungi    | no  | no  | no  |
| oman     | <i>cochliobolus hawaiiensis</i>       | Fungi    | no  | no  | no  |
| oman     | <i>cladosporium cladosporioides</i>   | Fungi    | yes | no  | no  |
| oman     | influenza b virus                     | Virus    | yes | yes | no  |
| oman     | <i>scedosporium apiospermum</i>       | Fungi    | no  | no  | no  |
| oman     | <i>candida glabrata</i>               | Fungi    | yes | yes | yes |
| oman     | <i>cryptendoxyla hypophloia</i>       | Fungi    | no  | no  | no  |
| oman     | <i>arthroderma gypseum</i>            | Fungi    | no  | no  | no  |
| oman     | <i>dipodascus capitatus</i>           | Fungi    | no  | no  | no  |
| oman     | <i>aspergillus terreus</i>            | Fungi    | no  | no  | no  |
| oman     | foot-and-mouth disease virus          | Virus    | no  | no  | no  |
| oman     | human enterovirus b                   | Virus    | yes | no  | yes |
| oman     | <i>trichophyton soudanense</i>        | Fungi    | yes | no  | no  |
| oman     | peste-des-petits-ruminants virus      | Virus    | no  | no  | no  |
| oman     | <i>candida tropicalis</i>             | Fungi    | yes | yes | no  |
| oman     | <i>epidermophyton floccosum</i>       | Fungi    | yes | yes | no  |
| oman     | <i>penicillium chrysogenum</i>        | Fungi    | yes | no  | no  |
| oman     | <i>aspergillus niger</i>              | Fungi    | yes | yes | no  |
| oman     | <i>schistosoma mansoni</i>            | Helminth | yes | yes | yes |
| oman     | <i>arthroderma otae</i>               | Fungi    | no  | no  | no  |
| oman     | <i>candida albicans</i>               | Fungi    | yes | yes | yes |
| oman     | <i>candida parapsilosis</i>           | Fungi    | yes | yes | no  |
| oman     | <i>rhizopus oryzae</i>                | Fungi    | yes | yes | no  |
| oman     | <i>alternaria alternata</i>           | Fungi    | yes | yes | no  |
| oman     | <i>kluveromyces marxianus</i>         | Fungi    | no  | no  | no  |
| oman     | measles virus                         | Virus    | yes | yes | yes |
| oman     | <i>aspergillus flavus</i>             | Fungi    | no  | no  | no  |
| pakistan | <i>rahnella aquatilis</i>             | Bacteria | yes | no  | no  |
| pakistan | <i>enterococcus faecalis</i>          | Bacteria | yes | yes | yes |
| pakistan | <i>microbacterium paraoxydans</i>     | Bacteria | no  | no  | no  |
| pakistan | <i>neisseria gonorrhoeae</i>          | Bacteria | yes | no  | yes |
| pakistan | crimean-congo hemorrhagic fever virus | Virus    | no  | no  | no  |
| pakistan | <i>lysiniabacillus fusiformis</i>     | Bacteria | no  | no  | no  |
| pakistan | <i>bacillus amyloliquefaciens</i>     | Bacteria | no  | no  | no  |
| pakistan | <i>salmonella enterica</i>            | Bacteria | no  | no  | no  |
| pakistan | <i>aspergillus niger</i>              | Fungi    | yes | yes | no  |
| pakistan | newcastle disease virus               | Virus    | yes | yes | no  |
| pakistan | <i>bacillus megaterium</i>            | Bacteria | no  | no  | no  |
| pakistan | <i>lysiniabacillus sphaericus</i>     | Bacteria | no  | no  | no  |
| pakistan | <i>staphylococcus gallinarum</i>      | Bacteria | no  | no  | no  |
| pakistan | hepatitis b virus                     | Virus    | yes | no  | yes |
| pakistan | <i>bacillus subtilis</i>              | Bacteria | yes | yes | no  |
| pakistan | <i>pseudomonas putida</i>             | Bacteria | yes | no  | no  |

|          |                                  |          |     |     |     |
|----------|----------------------------------|----------|-----|-----|-----|
| pakistan | sapporo virus                    | Virus    | no  | no  | no  |
| pakistan | bacillus licheniformis           | Bacteria | yes | yes | no  |
| pakistan | delftia acidovorans              | Bacteria | yes | no  | no  |
| pakistan | colletotrichum truncatum         | Fungi    | no  | no  | no  |
| pakistan | alcaligenes faecalis             | Bacteria | no  | no  | no  |
| pakistan | pseudomonas plecoglossicida      | Bacteria | no  | no  | no  |
| pakistan | human enterovirus c              | Virus    | yes | no  | no  |
| pakistan | mycoplasma vulturii              | Bacteria | no  | no  | no  |
| pakistan | human immunodeficiency virus 2   | Virus    | yes | no  | yes |
| pakistan | pseudomonas aeruginosa           | Bacteria | yes | yes | yes |
| pakistan | lactobacillus rhamnosus          | Bacteria | no  | no  | no  |
| pakistan | streptococcus pyogenes           | Bacteria | yes | yes | yes |
| pakistan | staphylococcus aureus            | Bacteria | yes | yes | yes |
| pakistan | human enterovirus b              | Virus    | yes | no  | yes |
| pakistan | enterococcus faecium             | Bacteria | yes | yes | yes |
| pakistan | rotavirus a                      | Virus    | yes | yes | yes |
| pakistan | norwalk virus                    | Virus    | yes | no  | yes |
| pakistan | bacillus mycoides                | Bacteria | yes | no  | no  |
| pakistan | hepatitis c virus                | Virus    | yes | no  | yes |
| pakistan | influenza a virus                | Virus    | yes | yes | yes |
| pakistan | lactobacillus fermentum          | Bacteria | no  | no  | no  |
| pakistan | mycobacterium tuberculosis       | Bacteria | yes | yes | yes |
| pakistan | fowl adenovirus c                | Virus    | no  | no  | no  |
| pakistan | serratia marcescens              | Bacteria | yes | yes | yes |
| pakistan | variola virus                    | Virus    | no  | no  | no  |
| pakistan | candida tropicalis               | Fungi    | yes | yes | no  |
| pakistan | dengue virus                     | Virus    | no  | no  | no  |
| pakistan | human immunodeficiency virus 1   | Virus    | yes | no  | yes |
| pakistan | plasmodium falciparum            | Protozoa | yes | no  | yes |
| pakistan | plasmodium vivax                 | Protozoa | yes | no  | yes |
| pakistan | enterobacter cloacae             | Bacteria | yes | yes | no  |
| pakistan | enterococcus casseliflavus       | Bacteria | yes | no  | no  |
| pakistan | peste-des-petits-ruminants virus | Virus    | no  | no  | no  |
| pakistan | dobrava-belgrade virus           | Virus    | yes | yes | no  |
| pakistan | bacillus pumilus                 | Bacteria | yes | no  | no  |
| pakistan | encephalitozoon intestinalis     | Fungi    | yes | no  | yes |
| pakistan | hepatitis delta virus            | Virus    | yes | no  | no  |
| pakistan | enterobacter aerogenes           | Bacteria | yes | yes | no  |
| pakistan | vibrio cholerae                  | Bacteria | yes | no  | yes |
| pakistan | bacillus cereus                  | Bacteria | yes | yes | no  |
| pakistan | brucella abortus                 | Bacteria | yes | yes | no  |
| pakistan | measles virus                    | Virus    | yes | yes | yes |
| pakistan | rabies virus                     | Virus    | yes | yes | yes |
| pakistan | foot-and-mouth disease virus     | Virus    | no  | no  | no  |
| pakistan | trypanosoma theileri             | Protozoa | no  | no  | no  |
| pakistan | hepatitis e virus                | Virus    | yes | yes | yes |
| pakistan | bacillus thuringiensis           | Bacteria | yes | no  | no  |
| pakistan | cellulosimicrobium cellulans     | Bacteria | no  | no  | no  |
| pakistan | stenotrophomonas maltophilia     | Bacteria | no  | no  | no  |
| pakistan | klebsiella oxytoca               | Bacteria | yes | yes | no  |

|                      |                                       |          |     |     |     |
|----------------------|---------------------------------------|----------|-----|-----|-----|
| pakistan             | bacillus mojavensis                   | Bacteria | no  | no  | no  |
| pakistan             | mycoplasma gallisepticum              | Bacteria | no  | no  | no  |
| pakistan             | pseudomonas fluorescens               | Bacteria | yes | no  | no  |
| pakistan             | fowl adenovirus a                     | Virus    | no  | no  | no  |
| pakistan             | leuconostoc mesenteroides             | Bacteria | no  | no  | no  |
| pakistan             | pseudomonas chlororaphis              | Bacteria | no  | no  | no  |
| pakistan             | escherichia coli                      | Bacteria | yes | yes | yes |
| pakistan             | helicobacter pylori                   | Bacteria | yes | yes | no  |
| pakistan             | bluetongue virus                      | Virus    | no  | no  | no  |
| pakistan             | proteus mirabilis                     | Bacteria | yes | yes | no  |
| palau                | salinispora arenicola                 | Bacteria | no  | no  | no  |
| palau                | euryhaliotrematoides grandis          | Helminth | no  | no  | no  |
| palau                | euryhaliotrematoides triangulovagina  | Helminth | no  | no  | no  |
| palau                | prochloron didemni                    | Bacteria | no  | no  | no  |
| palau                | haliotrema angelopterum               | Helminth | no  | no  | no  |
| palau                | euryhaliotrematoides microphallus     | Helminth | no  | no  | no  |
| palestinian territor | brucella melitensis                   | Bacteria | yes | yes | yes |
| palestinian territor | foot-and-mouth disease virus          | Virus    | no  | no  | no  |
| palestinian territor | human enterovirus c                   | Virus    | yes | no  | no  |
| panama               | vesicular stomatitis new jersey virus | Virus    | no  | no  | no  |
| panama               | human enterovirus b                   | Virus    | yes | no  | yes |
| panama               | leishmania braziliensis               | Protozoa | yes | yes | no  |
| panama               | vesicular stomatitis indiana virus    | Virus    | yes | yes | no  |
| panama               | schizophyllum commune                 | Fungi    | yes | no  | no  |
| panama               | human immunodeficiency virus 1        | Virus    | yes | no  | yes |
| panama               | candida haemulonis                    | Fungi    | yes | no  | no  |
| panama               | toxoplasma gondii                     | Protozoa | yes | yes | yes |
| panama               | dengue virus                          | Virus    | no  | no  | no  |
| panama               | leishmania panamensis                 | Protozoa | yes | yes | no  |
| panama               | primate t-lymphotropic virus 1        | Virus    | no  | no  | no  |
| panama               | madrid virus                          | Virus    | yes | yes | no  |
| panama               | coprinellus domesticus                | Fungi    | no  | no  | no  |
| panama               | plasmodium vivax                      | Protozoa | yes | no  | yes |
| panama               | xanthomonas campestris                | Bacteria | no  | no  | no  |
| panama               | hepatitis b virus                     | Virus    | yes | no  | yes |
| panama               | human immunodeficiency virus 2        | Virus    | yes | no  | yes |
| panama               | batrachochytrium dendrobatidis        | Fungi    | no  | no  | no  |
| panama               | eastern equine encephalitis virus     | Virus    | yes | yes | yes |
| panama               | ascaris lumbricoides                  | Helminth | yes | yes | no  |
| panama               | leishmania mexicana                   | Protozoa | yes | yes | no  |
| panama               | escherichia coli                      | Bacteria | yes | yes | yes |
| panama               | echinococcus oligarthrus              | Helminth | no  | no  | no  |
| panama               | plasmodium falciparum                 | Protozoa | yes | no  | yes |
| panama               | bunyamwera virus                      | Virus    | yes | yes | no  |
| panama               | primate t-lymphotropic virus 2        | Virus    | no  | no  | no  |
| panama               | caraparu virus                        | Virus    | yes | yes | no  |
| panama               | influenza a virus                     | Virus    | yes | yes | yes |
| panama               | talaromyces indigoticus               | Fungi    | no  | no  | no  |
| panama               | bothriocephalus acheilognathi         | Helminth | no  | no  | no  |
| panama               | staphylococcus aureus                 | Bacteria | yes | yes | yes |



|                  |                                      |          |     |     |     |
|------------------|--------------------------------------|----------|-----|-----|-----|
| panama           | trichuris trichiura                  | Helminth | yes | yes | no  |
| panama           | human rhinovirus a                   | Virus    | yes | no  | no  |
| panama           | ajellomyces capsulatus               | Fungi    | no  | no  | no  |
| panama           | helicobacter pylori                  | Bacteria | yes | yes | no  |
| panama           | human rhinovirus b                   | Virus    | yes | no  | no  |
| panama           | venezuelan equine encephalitis virus | Virus    | yes | yes | yes |
| panama           | measles virus                        | Virus    | yes | yes | yes |
| panama           | human rhinovirus c                   | Virus    | no  | no  | no  |
| panama           | influenza b virus                    | Virus    | yes | yes | no  |
| panama           | trypanosoma cruzi                    | Protozoa | yes | yes | yes |
| panama           | pseudomonas aeruginosa               | Bacteria | yes | yes | yes |
| panama           | rickettsia rickettsii                | Bacteria | yes | yes | no  |
| panama           | trypanosoma rangeli                  | Protozoa | no  | no  | no  |
| papua new guinea | xanthomonas campestris               | Bacteria | no  | no  | no  |
| papua new guinea | japanese encephalitis virus          | Virus    | yes | yes | yes |
| papua new guinea | wuchereria bancrofti                 | Helminth | yes | no  | yes |
| papua new guinea | botryosphaeria rhodina               | Fungi    | no  | no  | no  |
| papua new guinea | hepatitis b virus                    | Virus    | yes | no  | yes |
| papua new guinea | plasmodium vivax                     | Protozoa | yes | no  | yes |
| papua new guinea | aspergillus penicillioides           | Fungi    | no  | no  | no  |
| papua new guinea | streptococcus pneumoniae             | Bacteria | yes | yes | yes |
| papua new guinea | streptococcus pyogenes               | Bacteria | yes | yes | yes |
| papua new guinea | cryptococcus gattii                  | Fungi    | no  | no  | no  |
| papua new guinea | human immunodeficiency virus 1       | Virus    | yes | no  | yes |
| papua new guinea | schizophyllum commune                | Fungi    | yes | no  | no  |
| papua new guinea | jc polyomavirus                      | Virus    | no  | no  | no  |
| papua new guinea | haemophilus influenzae               | Bacteria | yes | no  | yes |
| papua new guinea | measles virus                        | Virus    | yes | yes | yes |
| papua new guinea | neisseria gonorrhoeae                | Bacteria | yes | no  | yes |
| papua new guinea | influenza b virus                    | Virus    | yes | yes | no  |
| papua new guinea | dengue virus                         | Virus    | no  | no  | no  |
| papua new guinea | human rhinovirus c                   | Virus    | no  | no  | no  |
| papua new guinea | chlamydia trachomatis                | Bacteria | yes | yes | yes |
| papua new guinea | human immunodeficiency virus 2       | Virus    | yes | no  | yes |
| papua new guinea | trichinella papuae                   | Helminth | no  | no  | no  |
| papua new guinea | plasmodium falciparum                | Protozoa | yes | no  | yes |
| paraguay         | human adenovirus c                   | Virus    | yes | no  | no  |
| paraguay         | peltidocotyle rugosa                 | Helminth | no  | no  | no  |
| paraguay         | human parvovirus b19                 | Virus    | no  | no  | no  |
| paraguay         | nomimoscolex lopesi                  | Helminth | no  | no  | no  |
| paraguay         | polystoma cuvieri                    | Helminth | no  | no  | no  |
| paraguay         | influenza a virus                    | Virus    | yes | yes | yes |
| paraguay         | andes virus                          | Virus    | yes | yes | yes |
| paraguay         | peltidocotyle lenha                  | Helminth | no  | no  | no  |
| paraguay         | monticellia coryphicephala           | Helminth | no  | no  | no  |
| paraguay         | human adenovirus d                   | Virus    | yes | no  | no  |
| paraguay         | spatulifer maringaensis              | Helminth | no  | no  | no  |
| paraguay         | trypanosoma cruzi                    | Protozoa | yes | yes | yes |
| paraguay         | rotavirus a                          | Virus    | yes | yes | yes |
| paraguay         | nomimoscolex matogrossensis          | Helminth | no  | no  | no  |

|          |                                   |          |     |     |     |
|----------|-----------------------------------|----------|-----|-----|-----|
| paraguay | nomimoscolex chubbi               | Helminth | no  | no  | no  |
| paraguay | human papillomavirus 16           | Virus    | no  | no  | no  |
| paraguay | ageneiella brevifilis             | Helminth | no  | no  | no  |
| paraguay | gibsoniella meursaulti            | Helminth | no  | no  | no  |
| paraguay | dengue virus                      | Virus    | no  | no  | no  |
| paraguay | polystoma lopezromani             | Helminth | no  | no  | no  |
| paraguay | human immunodeficiency virus 1    | Virus    | yes | no  | yes |
| peru     | dengue virus                      | Virus    | no  | no  | no  |
| peru     | fasciola hepatica                 | Helminth | yes | yes | no  |
| peru     | allpahuayo virus                  | Virus    | no  | no  | no  |
| peru     | bunyamwera virus                  | Virus    | yes | yes | no  |
| peru     | newcastle disease virus           | Virus    | yes | yes | no  |
| peru     | plasmodium vivax                  | Protozoa | yes | no  | yes |
| peru     | taenia solium                     | Helminth | yes | no  | yes |
| peru     | foot-and-mouth disease virus      | Virus    | no  | no  | no  |
| peru     | salmonella enterica               | Bacteria | no  | no  | no  |
| peru     | enterocytozoon bienewisi          | Fungi    | yes | no  | yes |
| peru     | yellow fever virus                | Virus    | yes | yes | yes |
| peru     | paracoccidioides brasiliensis     | Fungi    | yes | yes | no  |
| peru     | human immunodeficiency virus 1    | Virus    | yes | no  | yes |
| peru     | neisseria gonorrhoeae             | Bacteria | yes | no  | yes |
| peru     | primate t-lymphotropic virus 1    | Virus    | no  | no  | no  |
| peru     | plasmodium ovale                  | Protozoa | yes | no  | no  |
| peru     | echinococcus canadensis           | Helminth | no  | no  | no  |
| peru     | yersinia pestis                   | Bacteria | yes | yes | yes |
| peru     | cyclospora cayentanensis          | Protozoa | yes | yes | yes |
| peru     | human respiratory syncytial virus | Virus    | yes | no  | no  |
| peru     | leishmania peruviana              | Protozoa | yes | yes | no  |
| peru     | cryptosporidium meleagridis       | Protozoa | no  | no  | no  |
| peru     | rabies virus                      | Virus    | yes | yes | yes |
| peru     | helicobacter pylori               | Bacteria | yes | yes | no  |
| peru     | influenza b virus                 | Virus    | yes | yes | no  |
| peru     | gibberella intermedia             | Fungi    | no  | no  | no  |
| peru     | chlamydia trachomatis             | Bacteria | yes | yes | yes |
| peru     | vibrio cholerae                   | Bacteria | yes | no  | yes |
| peru     | entamoeba coli                    | Protozoa | no  | no  | no  |
| peru     | leptospira kirschneri             | Bacteria | yes | yes | no  |
| peru     | marituba virus                    | Virus    | yes | yes | no  |
| peru     | caraparuvirus                     | Virus    | yes | yes | no  |
| peru     | escherichia coli                  | Bacteria | yes | yes | yes |
| peru     | cryptosporidium parvum            | Protozoa | yes | yes | yes |
| peru     | influenza a virus                 | Virus    | yes | yes | yes |
| peru     | human herpesvirus 8               | Virus    | yes | no  | yes |
| peru     | hepatitis b virus                 | Virus    | yes | no  | yes |
| peru     | diphyllobothrium pacificum        | Helminth | yes | yes | no  |
| peru     | eastern equine encephalitis virus | Virus    | yes | yes | yes |
| peru     | sporothrix schenckii              | Fungi    | yes | yes | no  |
| peru     | hepatitis c virus                 | Virus    | yes | no  | yes |
| peru     | mayaro virus                      | Virus    | yes | yes | yes |
| peru     | bacillus amyloliquefaciens        | Bacteria | no  | no  | no  |

|             |                                      |          |     |     |     |
|-------------|--------------------------------------|----------|-----|-----|-----|
| peru        | fusarium solani                      | Fungi    | yes | yes | yes |
| peru        | phocoena spinipinnis papillomavirus  | Virus    | no  | no  | no  |
| peru        | leptospira borgpetersenii            | Bacteria | yes | yes | no  |
| peru        | rio mamore virus                     | Virus    | no  | no  | no  |
| peru        | leptospira interrogans               | Bacteria | yes | yes | yes |
| peru        | bartonella bacilliformis             | Bacteria | no  | no  | no  |
| peru        | trypanosoma cruzi                    | Protozoa | yes | yes | yes |
| peru        | leptospira fainei                    | Bacteria | no  | no  | no  |
| peru        | mycobacterium tuberculosis           | Bacteria | yes | yes | yes |
| peru        | fowl adenovirus c                    | Virus    | no  | no  | no  |
| peru        | potamotrygonocotyle rionegrense      | Helminth | no  | no  | no  |
| peru        | prosthenhystera obesa                | Helminth | no  | no  | no  |
| peru        | plasmodium falciparum                | Protozoa | yes | no  | yes |
| peru        | human immunodeficiency virus 2       | Virus    | yes | no  | yes |
| peru        | venezuelan equine encephalitis virus | Virus    | yes | yes | yes |
| peru        | echinococcus granulosus              | Helminth | yes | yes | yes |
| philippines | hepatitis c virus                    | Virus    | yes | no  | yes |
| philippines | japanese encephalitis virus          | Virus    | yes | yes | yes |
| philippines | balantidium coli                     | Protozoa | yes | yes | no  |
| philippines | wuchereria bancrofti                 | Helminth | yes | no  | yes |
| philippines | human immunodeficiency virus 1       | Virus    | yes | no  | yes |
| philippines | fusarium solani                      | Fungi    | yes | yes | yes |
| philippines | mecistocirrus digitatus              | Helminth | yes | yes | no  |
| philippines | influenza a virus                    | Virus    | yes | yes | yes |
| philippines | anaplasma platys                     | Bacteria | no  | no  | no  |
| philippines | naegleria philippinensis             | Protozoa | no  | no  | no  |
| philippines | paragonimus westermani               | Helminth | yes | yes | no  |
| philippines | schistosoma japonicum                | Helminth | yes | yes | no  |
| philippines | foot-and-mouth disease virus         | Virus    | no  | no  | no  |
| philippines | staphylococcus aureus                | Bacteria | yes | yes | yes |
| philippines | salmonella enterica                  | Bacteria | no  | no  | no  |
| philippines | plasmodium vivax                     | Protozoa | yes | no  | yes |
| philippines | taenia solium                        | Helminth | yes | no  | yes |
| philippines | jc polyomavirus                      | Virus    | no  | no  | no  |
| philippines | caprine arthritis encephalitis virus | Virus    | no  | no  | no  |
| philippines | human rhinovirus a                   | Virus    | yes | no  | no  |
| philippines | bk polyomavirus                      | Virus    | no  | no  | no  |
| philippines | mycobacterium leprae                 | Bacteria | yes | yes | yes |
| philippines | saccharomyces cerevisiae             | Fungi    | yes | no  | no  |
| philippines | mycobacterium tuberculosis           | Bacteria | yes | yes | yes |
| philippines | fusarium oxysporum                   | Fungi    | yes | no  | yes |
| philippines | rabies virus                         | Virus    | yes | yes | yes |
| philippines | human immunodeficiency virus 2       | Virus    | yes | no  | yes |
| philippines | leptospira interrogans               | Bacteria | yes | yes | yes |
| philippines | cordyceps bassiana                   | Fungi    | no  | no  | no  |
| philippines | helicobacter pylori                  | Bacteria | yes | yes | no  |
| philippines | gnathostoma spinigerum               | Helminth | yes | yes | no  |
| philippines | hepatitis b virus                    | Virus    | yes | no  | yes |
| philippines | human enterovirus c                  | Virus    | yes | no  | no  |
| philippines | haemophilus influenzae               | Bacteria | yes | no  | yes |

|             |                                        |          |     |     |     |
|-------------|----------------------------------------|----------|-----|-----|-----|
| philippines | serratia marcescens                    | Bacteria | yes | yes | yes |
| philippines | human rhinovirus c                     | Virus    | no  | no  | no  |
| philippines | leptospira borgpetersenii              | Bacteria | yes | yes | no  |
| philippines | rotavirus a                            | Virus    | yes | yes | yes |
| philippines | vibrio alginolyticus                   | Bacteria | yes | yes | no  |
| philippines | plasmodium falciparum                  | Protozoa | yes | no  | yes |
| philippines | streptococcus pneumoniae               | Bacteria | yes | yes | yes |
| philippines | dengue virus                           | Virus    | no  | no  | no  |
| philippines | influenza b virus                      | Virus    | yes | yes | no  |
| philippines | entamoeba histolytica                  | Protozoa | yes | yes | no  |
| poland      | staphylococcus saprophyticus           | Bacteria | yes | no  | no  |
| poland      | cryptosporidium parvum                 | Protozoa | yes | yes | yes |
| poland      | goose parvovirus                       | Virus    | no  | no  | no  |
| poland      | bovine leukemia virus                  | Virus    | no  | no  | no  |
| poland      | bartonella bovis                       | Bacteria | no  | no  | no  |
| poland      | ophiostoma stenoceras                  | Fungi    | no  | no  | no  |
| poland      | borrelia valaisiana                    | Bacteria | no  | no  | no  |
| poland      | human parvovirus b19                   | Virus    | no  | no  | no  |
| poland      | pasteurella dagmatis                   | Bacteria | yes | yes | no  |
| poland      | hepatozoon canis                       | Protozoa | no  | no  | no  |
| poland      | foot-and-mouth disease virus           | Virus    | no  | no  | no  |
| poland      | bartonella schoenbuchensis             | Bacteria | no  | no  | no  |
| poland      | anaplasma phagocytophilum              | Bacteria | no  | no  | no  |
| poland      | diplostomum baeri                      | Helminth | no  | no  | no  |
| poland      | equine arteritis virus                 | Virus    | no  | no  | no  |
| poland      | anguillicoloides crassus               | Helminth | no  | no  | no  |
| poland      | diplostomum paracaudum                 | Helminth | no  | no  | no  |
| poland      | brachyspira hyodysenteriae             | Bacteria | no  | no  | no  |
| poland      | agrobacterium tumefaciens              | Bacteria | no  | no  | no  |
| poland      | giardia intestinalis                   | Protozoa | no  | no  | no  |
| poland      | borrelia burgdorferi                   | Bacteria | yes | yes | yes |
| poland      | fowl adenovirus a                      | Virus    | no  | no  | no  |
| poland      | sporothrix mexicana                    | Fungi    | no  | no  | no  |
| poland      | trichomonas vaginalis                  | Protozoa | yes | no  | yes |
| poland      | penicillium polonicum                  | Fungi    | no  | no  | no  |
| poland      | toxoplasma gondii                      | Protozoa | yes | yes | yes |
| poland      | turkey astrovirus                      | Virus    | no  | no  | no  |
| poland      | porcine reproductive and respiratory s | Virus    | no  | no  | no  |
| poland      | measles virus                          | Virus    | yes | yes | yes |
| poland      | european bat lyssavirus 1              | Virus    | yes | yes | no  |
| poland      | echinococcus granulosus                | Helminth | yes | yes | yes |
| poland      | anaplasma marginale                    | Bacteria | no  | no  | no  |
| poland      | trichobilharzia regenti                | Helminth | no  | no  | no  |
| poland      | heligmosomoides polygyrus              | Helminth | no  | no  | no  |
| poland      | hepatitis delta virus                  | Virus    | yes | no  | no  |
| poland      | agrobacterium rhizogenes               | Bacteria | no  | no  | no  |
| poland      | corynebacterium tuberculostearicum     | Bacteria | no  | no  | no  |
| poland      | bacillus subtilis                      | Bacteria | yes | yes | no  |
| poland      | bovine foamy virus                     | Virus    | no  | no  | no  |
| poland      | echinococcus multilocularis            | Helminth | yes | yes | no  |

|        |                                      |          |     |     |     |
|--------|--------------------------------------|----------|-----|-----|-----|
| poland | <i>geomyces destructans</i>          | Fungi    | no  | no  | no  |
| poland | human enterovirus b                  | Virus    | yes | no  | yes |
| poland | <i>borrelia bissetii</i>             | Bacteria | no  | no  | no  |
| poland | <i>bacillus megaterium</i>           | Bacteria | no  | no  | no  |
| poland | <i>bartonella grahamii</i>           | Bacteria | no  | no  | no  |
| poland | <i>proteus mirabilis</i>             | Bacteria | yes | yes | no  |
| poland | <i>gyrodactylus turnbulli</i>        | Helminth | no  | no  | no  |
| poland | influenza b virus                    | Virus    | yes | yes | no  |
| poland | <i>diplostomum spathaceum</i>        | Helminth | yes | yes | no  |
| poland | tula virus                           | Virus    | no  | no  | no  |
| poland | <i>echinococcus canadensis</i>       | Helminth | no  | no  | no  |
| poland | <i>acinetobacter baumannii</i>       | Bacteria | yes | no  | no  |
| poland | <i>staphylococcus epidermidis</i>    | Bacteria | yes | yes | yes |
| poland | <i>rhizomucor pusillus</i>           | Fungi    | yes | yes | no  |
| poland | <i>ruminococcus flavefaciens</i>     | Bacteria | no  | no  | no  |
| poland | <i>taenia hydatigena</i>             | Helminth | no  | no  | no  |
| poland | <i>staphylococcus aureus</i>         | Bacteria | yes | yes | yes |
| poland | <i>borrelia lusitaniae</i>           | Bacteria | no  | no  | no  |
| poland | gallid herpesvirus 2                 | Virus    | no  | no  | no  |
| poland | <i>mesocestoides litteratus</i>      | Helminth | no  | no  | no  |
| poland | rabies virus                         | Virus    | yes | yes | yes |
| poland | <i>hysterothylacium aduncum</i>      | Helminth | no  | no  | no  |
| poland | hepatitis c virus                    | Virus    | yes | no  | yes |
| poland | <i>ajellomyces capsulatus</i>        | Fungi    | no  | no  | no  |
| poland | <i>babesia canis</i>                 | Protozoa | no  | no  | no  |
| poland | <i>clostridium difficile</i>         | Bacteria | yes | yes | yes |
| poland | <i>borrelia spielmanii</i>           | Bacteria | no  | no  | no  |
| poland | <i>candida albicans</i>              | Fungi    | yes | yes | yes |
| poland | <i>schistocephalus solidus</i>       | Helminth | yes | yes | no  |
| poland | <i>staphylococcus lentus</i>         | Bacteria | no  | no  | no  |
| poland | <i>acinetobacter lwoffii</i>         | Bacteria | yes | no  | no  |
| poland | <i>aureobasidium pullulans</i>       | Fungi    | yes | no  | no  |
| poland | fowl adenovirus d                    | Virus    | no  | no  | no  |
| poland | <i>babesia capreoli</i>              | Protozoa | no  | no  | no  |
| poland | <i>borrelia miyamotoi</i>            | Bacteria | no  | no  | no  |
| poland | <i>trichomonas canistomae</i>        | Protozoa | no  | no  | no  |
| poland | <i>anisakis simplex</i>              | Helminth | yes | yes | yes |
| poland | <i>rhodococcus erythropolis</i>      | Bacteria | yes | no  | no  |
| poland | influenza a virus                    | Virus    | yes | yes | yes |
| poland | <i>rickettsia helvetica</i>          | Bacteria | yes | no  | no  |
| poland | <i>pasteurella canis</i>             | Bacteria | yes | yes | no  |
| poland | <i>escherichia coli</i>              | Bacteria | yes | yes | yes |
| poland | <i>paracoccus marcusii</i>           | Bacteria | no  | no  | no  |
| poland | avian coronavirus                    | Virus    | no  | no  | no  |
| poland | <i>borrelia garinii</i>              | Bacteria | no  | no  | no  |
| poland | <i>pseudomonas aeruginosa</i>        | Bacteria | yes | yes | yes |
| poland | caprine arthritis encephalitis virus | Virus    | no  | no  | no  |
| poland | hepatitis b virus                    | Virus    | yes | no  | yes |
| poland | hepatitis e virus                    | Virus    | yes | yes | yes |
| poland | <i>trichinella spiralis</i>          | Helminth | yes | yes | yes |

|          |                                 |          |     |     |     |
|----------|---------------------------------|----------|-----|-----|-----|
| poland   | mycobacterium tuberculosis      | Bacteria | yes | yes | yes |
| poland   | infectious bursal disease virus | Virus    | no  | no  | no  |
| poland   | staphylococcus pasteurii        | Bacteria | no  | no  | no  |
| poland   | brucella abortus                | Bacteria | yes | yes | no  |
| poland   | trichobilharzia szidati         | Helminth | no  | no  | no  |
| poland   | babesia divergens               | Protozoa | yes | yes | no  |
| poland   | helicobacter pylori             | Bacteria | yes | yes | no  |
| poland   | streptococcus pneumoniae        | Bacteria | yes | yes | yes |
| poland   | bacillus circulans              | Bacteria | yes | no  | no  |
| poland   | diplostomum mergi               | Helminth | no  | no  | no  |
| poland   | human immunodeficiency virus 1  | Virus    | yes | no  | yes |
| poland   | mycoplasma haemofelis           | Bacteria | no  | no  | no  |
| poland   | campylobacter coli              | Bacteria | yes | yes | no  |
| poland   | leptospira interrogans          | Bacteria | yes | yes | yes |
| poland   | borrelia afzelii                | Bacteria | no  | no  | no  |
| poland   | trichobilharzia franki          | Helminth | no  | no  | no  |
| poland   | babesia microti                 | Protozoa | yes | yes | yes |
| poland   | bacillus thuringiensis          | Bacteria | yes | no  | no  |
| poland   | campylobacter jejuni            | Bacteria | yes | yes | yes |
| poland   | klebsiella pneumoniae           | Bacteria | yes | yes | yes |
| poland   | toxocara canis                  | Helminth | yes | yes | no  |
| portugal | clavospora lusitaniae           | Fungi    | no  | no  | no  |
| portugal | bacillus pumilus                | Bacteria | yes | no  | no  |
| portugal | candida tropicalis              | Fungi    | yes | yes | no  |
| portugal | klebsiella pneumoniae           | Bacteria | yes | yes | yes |
| portugal | pseudomonas stutzeri            | Bacteria | yes | no  | no  |
| portugal | lymphocystis disease virus 1    | Virus    | no  | no  | no  |
| portugal | west nile virus                 | Virus    | yes | yes | yes |
| portugal | micrococcus luteus              | Bacteria | no  | no  | no  |
| portugal | human papillomavirus 16         | Virus    | no  | no  | no  |
| portugal | hepatitis c virus               | Virus    | yes | no  | yes |
| portugal | fusarium solani                 | Fungi    | yes | yes | yes |
| portugal | angiostrongylus vasorum         | Helminth | no  | no  | no  |
| portugal | staphylococcus pasteurii        | Bacteria | no  | no  | no  |
| portugal | botryosphaeria dothidea         | Fungi    | no  | no  | no  |
| portugal | bacillus megaterium             | Bacteria | no  | no  | no  |
| portugal | saccharomyces cerevisiae        | Fungi    | yes | no  | no  |
| portugal | trichosporon mucoides           | Fungi    | yes | yes | no  |
| portugal | aureobasidium pullulans         | Fungi    | yes | no  | no  |
| portugal | candida zeylanoides             | Fungi    | yes | no  | no  |
| portugal | beak and feather disease virus  | Virus    | no  | no  | no  |
| portugal | babesia canis                   | Protozoa | no  | no  | no  |
| portugal | leishmania donovani             | Protozoa | yes | yes | yes |
| portugal | lewia infectoria                | Fungi    | no  | no  | no  |
| portugal | trichosporon inkin              | Fungi    | yes | yes | no  |
| portugal | schizophyllum commune           | Fungi    | yes | no  | no  |
| portugal | cryptosporidium parvum          | Protozoa | yes | yes | yes |
| portugal | bovine viral diarrhea virus 1   | Virus    | no  | no  | no  |
| portugal | stenotrophomonas maltophilia    | Bacteria | no  | no  | no  |
| portugal | enterococcus faecalis           | Bacteria | yes | yes | yes |

|          |                                 |          |     |     |     |
|----------|---------------------------------|----------|-----|-----|-----|
| portugal | dietzia natronolimnaea          | Bacteria | no  | no  | no  |
| portugal | enterobacter cloacae            | Bacteria | yes | yes | no  |
| portugal | bacillus licheniformis          | Bacteria | yes | yes | no  |
| portugal | aeromonas allosaccharophila     | Bacteria | no  | no  | no  |
| portugal | infectious bursal disease virus | Virus    | no  | no  | no  |
| portugal | aspergillus carbonarius         | Fungi    | no  | no  | no  |
| portugal | heligmosomoides polygyrus       | Helminth | no  | no  | no  |
| portugal | trichosporon cutaneum           | Fungi    | yes | yes | no  |
| portugal | staphylococcus schleiferi       | Bacteria | no  | no  | no  |
| portugal | klebsiella oxytoca              | Bacteria | yes | yes | no  |
| portugal | streptococcus dysgalactiae      | Bacteria | no  | no  | no  |
| portugal | anguillicoloides crassus        | Helminth | no  | no  | no  |
| portugal | hepatitis b virus               | Virus    | yes | no  | yes |
| portugal | ctenotaenia marmotae            | Helminth | no  | no  | no  |
| portugal | primate t-lymphotropic virus 2  | Virus    | no  | no  | no  |
| portugal | candida intermedia              | Fungi    | yes | no  | no  |
| portugal | bacillus circulans              | Bacteria | yes | no  | no  |
| portugal | anisakis simplex                | Helminth | yes | yes | yes |
| portugal | vibrio alginolyticus            | Bacteria | yes | yes | no  |
| portugal | rhodotorula slooffiae           | Fungi    | no  | no  | no  |
| portugal | citrobacter braakii             | Bacteria | yes | yes | no  |
| portugal | rothia dentocariosa             | Bacteria | yes | no  | no  |
| portugal | staphylococcus cohnii           | Bacteria | no  | no  | no  |
| portugal | staphylococcus hominis          | Bacteria | no  | no  | no  |
| portugal | cryptococcus neoformans         | Fungi    | yes | yes | yes |
| portugal | rickettsia massiliae            | Bacteria | yes | yes | no  |
| portugal | feline immunodeficiency virus   | Virus    | no  | no  | no  |
| portugal | pseudomonas plecoglossicida     | Bacteria | no  | no  | no  |
| portugal | aeromonas salmonicida           | Bacteria | no  | no  | no  |
| portugal | citrobacter freundii            | Bacteria | yes | yes | no  |
| portugal | candida bracarensis             | Fungi    | no  | no  | no  |
| portugal | acinetobacter baumannii         | Bacteria | yes | no  | no  |
| portugal | cryptosporidium hominis         | Protozoa | yes | no  | yes |
| portugal | measles virus                   | Virus    | yes | yes | yes |
| portugal | aeromonas hydrophila            | Bacteria | yes | yes | yes |
| portugal | achromobacter xylosoxidans      | Bacteria | yes | no  | no  |
| portugal | microbacterium oxydans          | Bacteria | no  | no  | no  |
| portugal | aeromonas media                 | Bacteria | no  | no  | no  |
| portugal | bovine viral diarrhea virus 2   | Virus    | no  | no  | no  |
| portugal | canine distemper virus          | Virus    | no  | no  | no  |
| portugal | vibrio splendidus               | Bacteria | no  | no  | no  |
| portugal | kytrococcus sedentarius         | Bacteria | no  | no  | no  |
| portugal | mycobacterium tuberculosis      | Bacteria | yes | yes | yes |
| portugal | theileria annulata              | Protozoa | no  | no  | no  |
| portugal | candida catenulata              | Fungi    | yes | no  | no  |
| portugal | aeromonas veronii               | Bacteria | yes | no  | yes |
| portugal | theileria ovis                  | Protozoa | no  | no  | no  |
| portugal | bacillus subtilis               | Bacteria | yes | yes | no  |
| portugal | shewanella putrefaciens         | Bacteria | no  | no  | no  |
| portugal | staphylococcus epidermidis      | Bacteria | yes | yes | yes |

|          |                                |          |     |     |     |
|----------|--------------------------------|----------|-----|-----|-----|
| portugal | echinococcus granulosus        | Helminth | yes | yes | yes |
| portugal | newcastle disease virus        | Virus    | yes | yes | no  |
| portugal | salmonella enterica            | Bacteria | no  | no  | no  |
| portugal | streptococcus pneumoniae       | Bacteria | yes | yes | yes |
| portugal | babesia bovis                  | Protozoa | yes | yes | no  |
| portugal | borrelia afzelii               | Bacteria | no  | no  | no  |
| portugal | rhodotorula mucilaginosa       | Fungi    | yes | yes | no  |
| portugal | colletotrichum dematium        | Fungi    | yes | no  | no  |
| portugal | aeromonas jandaei              | Bacteria | no  | no  | no  |
| portugal | candida parapsilosis           | Fungi    | yes | yes | no  |
| portugal | bacillus cereus                | Bacteria | yes | yes | no  |
| portugal | legionella pneumophila         | Bacteria | yes | no  | yes |
| portugal | influenza a virus              | Virus    | yes | yes | yes |
| portugal | paragonimus westermani         | Helminth | yes | yes | no  |
| portugal | pseudomonas anguilliseptica    | Bacteria | no  | no  | no  |
| portugal | anisakis pegreffii             | Helminth | no  | no  | no  |
| portugal | human immunodeficiency virus 1 | Virus    | yes | no  | yes |
| portugal | raoultella terrigena           | Bacteria | no  | no  | no  |
| portugal | aeromonas caviae               | Bacteria | yes | yes | yes |
| portugal | bacillus firmus                | Bacteria | no  | no  | no  |
| portugal | aeromonas eucrenophila         | Bacteria | no  | no  | no  |
| portugal | escherichia coli               | Bacteria | yes | yes | yes |
| portugal | african swine fever virus      | Virus    | no  | no  | no  |
| portugal | babesia bigemina               | Protozoa | no  | no  | no  |
| portugal | shigella boydii                | Bacteria | yes | yes | no  |
| portugal | rickettsia slovacae            | Bacteria | yes | yes | no  |
| portugal | microbacterium phyllosphaerae  | Bacteria | no  | no  | no  |
| portugal | bluetongue virus               | Virus    | no  | no  | no  |
| portugal | enterococcus faecium           | Bacteria | yes | yes | yes |
| portugal | human papillomavirus 53        | Virus    | no  | no  | no  |
| portugal | mumps virus                    | Virus    | yes | no  | no  |
| portugal | meyerozyma guilliermondii      | Fungi    | no  | no  | no  |
| portugal | primate t-lymphotropic virus 1 | Virus    | no  | no  | no  |
| portugal | trypanosoma granulosum         | Protozoa | no  | no  | no  |
| portugal | babesia occultans              | Protozoa | no  | no  | no  |
| portugal | human adenovirus b             | Virus    | yes | no  | no  |
| portugal | toxoplasma gondii              | Protozoa | yes | yes | yes |
| portugal | rickettsia conorii             | Bacteria | yes | yes | no  |
| portugal | rhodococcus erythropolis       | Bacteria | yes | no  | no  |
| portugal | pichia kudriavzevii            | Fungi    | no  | no  | no  |
| portugal | aeromonas aquariorum           | Bacteria | no  | no  | no  |
| portugal | bacillus thuringiensis         | Bacteria | yes | no  | no  |
| portugal | xanthomonas campestris         | Bacteria | no  | no  | no  |
| portugal | helicobacter pylori            | Bacteria | yes | yes | no  |
| portugal | shewanella haliotis            | Bacteria | no  | no  | no  |
| portugal | debaryomyces hansenii          | Fungi    | no  | no  | no  |
| portugal | jc polyomavirus                | Virus    | no  | no  | no  |
| portugal | anisakis typica                | Helminth | no  | no  | no  |
| portugal | human immunodeficiency virus 2 | Virus    | yes | no  | yes |
| portugal | aeromonas enteropelogenes      | Bacteria | no  | no  | no  |



|             |                                  |          |     |     |     |
|-------------|----------------------------------|----------|-----|-----|-----|
| portugal    | listonella anguillarum           | Bacteria | no  | no  | no  |
| portugal    | staphylococcus aureus            | Bacteria | yes | yes | yes |
| portugal    | ochrobactrum anthropi            | Bacteria | yes | no  | no  |
| portugal    | acinetobacter berezinae          | Bacteria | no  | no  | no  |
| portugal    | pseudomonas pseudoalcaligenes    | Bacteria | yes | no  | no  |
| puerto rico | aspergillus niger                | Fungi    | yes | yes | no  |
| puerto rico | hepatitis b virus                | Virus    | yes | no  | yes |
| puerto rico | west nile virus                  | Virus    | yes | yes | yes |
| puerto rico | escherichia coli                 | Bacteria | yes | yes | yes |
| puerto rico | botryosphaeria rhodina           | Fungi    | no  | no  | no  |
| puerto rico | fasciola hepatica                | Helminth | yes | yes | no  |
| puerto rico | human immunodeficiency virus 2   | Virus    | yes | no  | yes |
| puerto rico | influenza a virus                | Virus    | yes | yes | yes |
| puerto rico | pneumocystis carinii             | Fungi    | yes | yes | yes |
| puerto rico | strongyloides stercoralis        | Helminth | yes | yes | yes |
| puerto rico | alternaria alternata             | Fungi    | yes | yes | no  |
| puerto rico | campylobacter jejuni             | Bacteria | yes | yes | yes |
| puerto rico | cochliobolus spicifer            | Fungi    | no  | no  | no  |
| puerto rico | dengue virus                     | Virus    | no  | no  | no  |
| puerto rico | aspergillus tamaritii            | Fungi    | no  | no  | no  |
| puerto rico | staphylococcus aureus            | Bacteria | yes | yes | yes |
| puerto rico | hepatitis c virus                | Virus    | yes | no  | yes |
| puerto rico | babesia bigemina                 | Protozoa | no  | no  | no  |
| puerto rico | bluetongue virus                 | Virus    | no  | no  | no  |
| puerto rico | pseudomonas aeruginosa           | Bacteria | yes | yes | yes |
| puerto rico | schistosoma mansoni              | Helminth | yes | yes | yes |
| puerto rico | aspergillus flavus               | Fungi    | no  | no  | no  |
| puerto rico | chelonid herpesvirus 5           | Virus    | no  | no  | no  |
| puerto rico | aspergillus sydowii              | Fungi    | no  | no  | no  |
| puerto rico | aspergillus awamori              | Fungi    | no  | no  | no  |
| puerto rico | schizophyllum commune            | Fungi    | yes | no  | no  |
| puerto rico | aspergillus terreus              | Fungi    | no  | no  | no  |
| puerto rico | aspergillus versicolor           | Fungi    | yes | no  | no  |
| puerto rico | beak and feather disease virus   | Virus    | no  | no  | no  |
| puerto rico | rabies virus                     | Virus    | yes | yes | yes |
| puerto rico | cladosporium cladosporioides     | Fungi    | yes | no  | no  |
| puerto rico | ajellomyces capsulatus           | Fungi    | no  | no  | no  |
| puerto rico | cryptococcus neoformans          | Fungi    | yes | yes | yes |
| puerto rico | plasmodium falciparum            | Protozoa | yes | no  | yes |
| puerto rico | mycobacterium tuberculosis       | Bacteria | yes | yes | yes |
| puerto rico | cryptococcus gattii              | Fungi    | no  | no  | no  |
| puerto rico | klebsiella pneumoniae            | Bacteria | yes | yes | yes |
| puerto rico | macacine herpesvirus 5           | Virus    | no  | no  | no  |
| puerto rico | human immunodeficiency virus 1   | Virus    | yes | no  | yes |
| qatar       | bacillus licheniformis           | Bacteria | yes | yes | no  |
| qatar       | peste-des-petits-ruminants virus | Virus    | no  | no  | no  |
| qatar       | influenza a virus                | Virus    | yes | yes | yes |
| qatar       | fusarium solani                  | Fungi    | yes | yes | yes |
| qatar       | bacillus cereus                  | Bacteria | yes | yes | no  |
| qatar       | foot-and-mouth disease virus     | Virus    | no  | no  | no  |

|                     |                                        |          |     |     |     |
|---------------------|----------------------------------------|----------|-----|-----|-----|
| qatar               | bacillus thuringiensis                 | Bacteria | yes | no  | no  |
| republic of the con | hepatitis c virus                      | Virus    | yes | no  | yes |
| republic of the con | human immunodeficiency virus 2         | Virus    | yes | no  | yes |
| republic of the con | plasmodium billcollinsi                | Protozoa | no  | no  | no  |
| republic of the con | cryptococcus gattii                    | Fungi    | no  | no  | no  |
| republic of the con | treponema pallidum                     | Bacteria | yes | no  | yes |
| republic of the con | neisseria meningitidis                 | Bacteria | yes | no  | yes |
| republic of the con | zaire ebolavirus                       | Virus    | yes | yes | yes |
| republic of the con | plasmodium reichenowi                  | Protozoa | no  | no  | no  |
| republic of the con | african swine fever virus              | Virus    | no  | no  | no  |
| republic of the con | plasmodium billbrayi                   | Protozoa | no  | no  | no  |
| republic of the con | plasmodium falciparum                  | Protozoa | yes | no  | yes |
| republic of the con | human herpesvirus 8                    | Virus    | yes | no  | yes |
| republic of the con | hepatitis delta virus                  | Virus    | yes | no  | no  |
| republic of the con | measles virus                          | Virus    | yes | yes | yes |
| republic of the con | fonsecaea pedrosoi                     | Fungi    | no  | no  | no  |
| republic of the con | hepatitis b virus                      | Virus    | yes | no  | yes |
| republic of the con | yersinia pestis                        | Bacteria | yes | yes | yes |
| republic of the con | trypanosoma brucei                     | Protozoa | yes | yes | yes |
| republic of the con | plasmodium yoelii                      | Protozoa | no  | no  | no  |
| republic of the con | human immunodeficiency virus 1         | Virus    | yes | no  | yes |
| reunion             | rabbit hemorrhagic disease virus       | Virus    | no  | no  | no  |
| reunion             | trichobilharzia franki                 | Helminth | no  | no  | no  |
| reunion             | chikungunya virus                      | Virus    | yes | yes | yes |
| reunion             | pseudoalteromonas spongiae             | Bacteria | no  | no  | no  |
| reunion             | sporothrix albicans                    | Fungi    | no  | no  | no  |
| reunion             | epizootic hemorrhagic disease virus    | Virus    | no  | no  | no  |
| reunion             | dengue virus                           | Virus    | no  | no  | no  |
| reunion             | angiostrongylus cantonensis            | Helminth | yes | no  | no  |
| reunion             | babesia canis                          | Protozoa | no  | no  | no  |
| reunion             | influenza a virus                      | Virus    | yes | yes | yes |
| romania             | west nile virus                        | Virus    | yes | yes | yes |
| romania             | aspergillus candidus                   | Fungi    | yes | no  | no  |
| romania             | heligmosomoides polygyrus              | Helminth | no  | no  | no  |
| romania             | mycobacterium tuberculosis             | Bacteria | yes | yes | yes |
| romania             | cryptosporidium xiaoi                  | Protozoa | no  | no  | no  |
| romania             | echinococcus granulosus                | Helminth | yes | yes | yes |
| romania             | porcine reproductive and respiratory s | Virus    | no  | no  | no  |
| romania             | vibrio tasmaniensis                    | Bacteria | no  | no  | no  |
| romania             | human immunodeficiency virus 1         | Virus    | yes | no  | yes |
| romania             | gyrodactylus salaris                   | Helminth | no  | no  | no  |
| romania             | human enterovirus b                    | Virus    | yes | no  | yes |
| romania             | rickettsia helvetica                   | Bacteria | yes | no  | no  |
| romania             | influenza b virus                      | Virus    | yes | yes | no  |
| romania             | staphylococcus epidermidis             | Bacteria | yes | yes | yes |
| romania             | influenza a virus                      | Virus    | yes | yes | yes |
| romania             | hepatitis delta virus                  | Virus    | yes | no  | no  |
| romania             | alphacoronavirus 1                     | Virus    | no  | no  | no  |
| romania             | vibrio campbellii                      | Bacteria | no  | no  | no  |
| romania             | human immunodeficiency virus 2         | Virus    | yes | no  | yes |

|         |                              |          |     |     |     |
|---------|------------------------------|----------|-----|-----|-----|
| romania | micrococcus yunnanensis      | Bacteria | no  | no  | no  |
| romania | escherichia coli             | Bacteria | yes | yes | yes |
| romania | babesia gibsoni              | Protozoa | yes | yes | no  |
| romania | hepatitis c virus            | Virus    | yes | no  | yes |
| romania | pseudomonas aeruginosa       | Bacteria | yes | yes | yes |
| romania | burkholderia fungorum        | Bacteria | no  | no  | no  |
| romania | rhodococcus erythropolis     | Bacteria | yes | no  | no  |
| romania | rabies virus                 | Virus    | yes | yes | yes |
| romania | bacillus pumilus             | Bacteria | yes | no  | no  |
| romania | rickettsia monacensis        | Bacteria | yes | no  | no  |
| romania | echinococcus multilocularis  | Helminth | yes | yes | no  |
| romania | measles virus                | Virus    | yes | yes | yes |
| romania | trichinella spiralis         | Helminth | yes | yes | yes |
| romania | cryptosporidium parvum       | Protozoa | yes | yes | yes |
| romania | staphylococcus aureus        | Bacteria | yes | yes | yes |
| romania | atractolytocestus huronensis | Helminth | no  | no  | no  |
| romania | idiomarina loihiensis        | Bacteria | no  | no  | no  |
| romania | bacillus aquimaris           | Bacteria | no  | no  | no  |
| romania | dobrava-belgrade virus       | Virus    | yes | yes | no  |
| romania | echinococcus canadensis      | Helminth | no  | no  | no  |
| romania | bacillus megaterium          | Bacteria | no  | no  | no  |
| romania | staphylococcus warneri       | Bacteria | yes | yes | no  |
| russia  | trypanosoma grosi            | Protozoa | no  | no  | no  |
| russia  | rhodotorula slooffiae        | Fungi    | no  | no  | no  |
| russia  | pseudomonas xanthomarina     | Bacteria | no  | no  | no  |
| russia  | hepatitis a virus            | Virus    | yes | yes | yes |
| russia  | bordetella bronchiseptica    | Bacteria | yes | yes | no  |
| russia  | lewia infectoria             | Fungi    | no  | no  | no  |
| russia  | sapporo virus                | Virus    | no  | no  | no  |
| russia  | fusarium solani              | Fungi    | yes | yes | yes |
| russia  | encephalitozoon intestinalis | Fungi    | yes | no  | yes |
| russia  | saccharomyces cerevisiae     | Fungi    | yes | no  | no  |
| russia  | alphacoronavirus 1           | Virus    | no  | no  | no  |
| russia  | microbacterium oxydans       | Bacteria | no  | no  | no  |
| russia  | haemophilus influenzae       | Bacteria | yes | no  | yes |
| russia  | mumps virus                  | Virus    | yes | no  | no  |
| russia  | borrelia miyamotoi           | Bacteria | no  | no  | no  |
| russia  | bordetella pertussis         | Bacteria | yes | no  | yes |
| russia  | bacillus licheniformis       | Bacteria | yes | yes | no  |
| russia  | flavobacterium johnsoniae    | Bacteria | no  | no  | no  |
| russia  | trichostrongylus probolurus  | Helminth | yes | yes | no  |
| russia  | lactococcus lactis           | Bacteria | no  | no  | no  |
| russia  | human herpesvirus 4          | Virus    | no  | no  | no  |
| russia  | omsk hemorrhagic fever virus | Virus    | no  | no  | no  |
| russia  | rhodococcus erythropolis     | Bacteria | yes | no  | no  |
| russia  | eubothrium rugosum           | Helminth | no  | no  | no  |
| russia  | variovorax paradoxus         | Bacteria | no  | no  | no  |
| russia  | aspergillus terreus          | Fungi    | no  | no  | no  |
| russia  | legionella pneumophila       | Bacteria | yes | no  | yes |
| russia  | rickettsia sibirica          | Bacteria | yes | yes | no  |

|        |                                         |          |     |     |     |
|--------|-----------------------------------------|----------|-----|-----|-----|
| russia | staphylococcus aureus                   | Bacteria | yes | yes | yes |
| russia | bacillus mycoides                       | Bacteria | yes | no  | no  |
| russia | aquamicrobium lusatiense                | Bacteria | no  | no  | no  |
| russia | fowl adenovirus c                       | Virus    | no  | no  | no  |
| russia | acholeplasma laidlawii                  | Bacteria | no  | no  | no  |
| russia | avian orthoreovirus                     | Virus    | no  | no  | no  |
| russia | kluuvera ascorbata                      | Bacteria | yes | yes | no  |
| russia | babesia microti                         | Protozoa | yes | yes | yes |
| russia | hepatitis c virus                       | Virus    | yes | no  | yes |
| russia | human enterovirus a                     | Virus    | yes | no  | no  |
| russia | chlamydia trachomatis                   | Bacteria | yes | yes | yes |
| russia | morganella morganii                     | Bacteria | yes | yes | no  |
| russia | hepatitis e virus                       | Virus    | yes | yes | yes |
| russia | citrobacter freundii                    | Bacteria | yes | yes | no  |
| russia | borrelia afzelii                        | Bacteria | no  | no  | no  |
| russia | microbacterium resistens                | Bacteria | no  | no  | no  |
| russia | rotavirus a                             | Virus    | yes | yes | yes |
| russia | plasmodium vivax                        | Protozoa | yes | no  | yes |
| russia | human adenovirus c                      | Virus    | yes | no  | no  |
| russia | bacillus anthracis                      | Bacteria | yes | yes | yes |
| russia | clonorchis sinensis                     | Helminth | yes | no  | no  |
| russia | trichostrongylus colubriformis          | Helminth | yes | yes | no  |
| russia | candida tropicalis                      | Fungi    | yes | yes | no  |
| russia | borrelia valaisiana                     | Bacteria | no  | no  | no  |
| russia | leishmania donovani                     | Protozoa | yes | yes | yes |
| russia | ectromelia virus                        | Virus    | no  | no  | no  |
| russia | haemoproteus lanii                      | Protozoa | no  | no  | no  |
| russia | cryptococcus laurentii                  | Fungi    | no  | no  | no  |
| russia | dobrava-belgrade virus                  | Virus    | yes | yes | no  |
| russia | meleagrid herpesvirus 1                 | Virus    | no  | no  | no  |
| russia | pichia kudriavzevii                     | Fungi    | no  | no  | no  |
| russia | human parvovirus b19                    | Virus    | no  | no  | no  |
| russia | measles virus                           | Virus    | yes | yes | yes |
| russia | bovine leukemia virus                   | Virus    | no  | no  | no  |
| russia | bartonella taylorii                     | Bacteria | no  | no  | no  |
| russia | feline panleukopenia virus              | Virus    | no  | no  | no  |
| russia | aspergillus ustus                       | Fungi    | no  | no  | no  |
| russia | trichinella pseudospiralis              | Helminth | yes | yes | no  |
| russia | candida aaseri                          | Fungi    | no  | no  | no  |
| russia | shigella sonnei                         | Bacteria | yes | yes | no  |
| russia | tick-borne encephalitis virus           | Virus    | no  | no  | no  |
| russia | influenza b virus                       | Virus    | yes | yes | no  |
| russia | influenza a virus                       | Virus    | yes | yes | yes |
| russia | infectious hematopoietic necrosis virus | Virus    | no  | no  | no  |
| russia | haemoproteus tartakovskyi               | Protozoa | no  | no  | no  |
| russia | borrelia lusitaniae                     | Bacteria | no  | no  | no  |
| russia | eimeria irrsidua                        | Protozoa | no  | no  | no  |
| russia | agrobacterium tumefaciens               | Bacteria | no  | no  | no  |
| russia | cowpox virus                            | Virus    | yes | yes | no  |
| russia | mycobacterium tuberculosis              | Bacteria | yes | yes | yes |

|        |                                                     |          |     |     |     |
|--------|-----------------------------------------------------|----------|-----|-----|-----|
| russia | helicobacter pylori                                 | Bacteria | yes | yes | no  |
| russia | lysinibacillus sphaericus                           | Bacteria | no  | no  | no  |
| russia | streptococcus pneumoniae                            | Bacteria | yes | yes | yes |
| russia | paranoplocephala jarrelli                           | Helminth | no  | no  | no  |
| russia | rhodotorula mucilaginosa                            | Fungi    | yes | yes | no  |
| russia | zaire ebolavirus                                    | Virus    | yes | yes | yes |
| russia | heligmosomoides polygyrus                           | Helminth | no  | no  | no  |
| russia | avian coronavirus                                   | Virus    | no  | no  | no  |
| russia | avian metapneumovirus                               | Virus    | no  | no  | no  |
| russia | massilia timonae                                    | Bacteria | no  | no  | no  |
| russia | yarrowia lipolytica                                 | Fungi    | no  | no  | no  |
| russia | human adenovirus f                                  | Virus    | yes | no  | no  |
| russia | rabies virus                                        | Virus    | yes | yes | yes |
| russia | enterobacter cloacae                                | Bacteria | yes | yes | no  |
| russia | soboliphyme jamesoni                                | Helminth | no  | no  | no  |
| russia | aeromonas hydrophila                                | Bacteria | yes | yes | yes |
| russia | cordyceps bassiana                                  | Fungi    | no  | no  | no  |
| russia | bacillus pumilus                                    | Bacteria | yes | no  | no  |
| russia | crimean-congo hemorrhagic fever virus               | Virus    | no  | no  | no  |
| russia | bartonella vinsonii                                 | Bacteria | no  | no  | no  |
| russia | candida zeylanoides                                 | Fungi    | yes | no  | no  |
| russia | bunodera luciopercae                                | Helminth | no  | no  | no  |
| russia | enterococcus durans                                 | Bacteria | yes | yes | no  |
| russia | haemoproteus payevskyi                              | Protozoa | no  | no  | no  |
| russia | haemoproteus pallidus                               | Protozoa | no  | no  | no  |
| russia | digramma interrupta                                 | Helminth | no  | no  | no  |
| russia | aeromonas salmonicida                               | Bacteria | no  | no  | no  |
| russia | porcine reproductive and respiratory syndrome virus | Virus    | no  | no  | no  |
| russia | raoultella planticola                               | Bacteria | no  | no  | no  |
| russia | rabbit hemorrhagic disease virus                    | Virus    | no  | no  | no  |
| russia | avian paramyxovirus 6                               | Virus    | no  | no  | no  |
| russia | bacillus subtilis                                   | Bacteria | yes | yes | no  |
| russia | opisthorchis felinus                                | Helminth | yes | yes | no  |
| russia | acinetobacter lwoffii                               | Bacteria | yes | no  | no  |
| russia | aspergillus awamori                                 | Fungi    | no  | no  | no  |
| russia | delftia acidovorans                                 | Bacteria | yes | no  | no  |
| russia | paranoplocephala arctica                            | Helminth | no  | no  | no  |
| russia | canine distemper virus                              | Virus    | no  | no  | no  |
| russia | newcastle disease virus                             | Virus    | yes | yes | no  |
| russia | human herpesvirus 2                                 | Virus    | no  | no  | no  |
| russia | bartonella henselae                                 | Bacteria | yes | yes | no  |
| russia | emericella nidulans                                 | Fungi    | no  | no  | no  |
| russia | pseudomonas fluorescens                             | Bacteria | yes | no  | no  |
| russia | trichostrongylus axei                               | Helminth | yes | yes | no  |
| russia | shigella flexneri                                   | Bacteria | yes | yes | no  |
| russia | cladosporium bruhnei                                | Fungi    | no  | no  | no  |
| russia | coxiella burnetii                                   | Bacteria | yes | yes | no  |
| russia | discocotyle sagittata                               | Helminth | no  | no  | no  |
| russia | bk polyomavirus                                     | Virus    | no  | no  | no  |
| russia | vibrio cholerae                                     | Bacteria | yes | no  | yes |

|        |                                       |          |     |     |     |
|--------|---------------------------------------|----------|-----|-----|-----|
| russia | california encephalitis virus         | Virus    | yes | yes | yes |
| russia | foot-and-mouth disease virus          | Virus    | no  | no  | no  |
| russia | bovine adenovirus d                   | Virus    | no  | no  | no  |
| russia | haemoproteus belopolskyi              | Protozoa | no  | no  | no  |
| russia | puumala virus                         | Virus    | yes | yes | yes |
| russia | soboliphyme baturini                  | Helminth | no  | no  | no  |
| russia | stenotrophomonas maltophilia          | Bacteria | no  | no  | no  |
| russia | human adenovirus d                    | Virus    | yes | no  | no  |
| russia | sindbis virus                         | Virus    | yes | yes | yes |
| russia | pseudomonas putida                    | Bacteria | yes | no  | no  |
| russia | babesia canis                         | Protozoa | no  | no  | no  |
| russia | ligula intestinalis                   | Helminth | yes | yes | no  |
| russia | debaryomyces hansenii                 | Fungi    | no  | no  | no  |
| russia | borrelia garinii                      | Bacteria | no  | no  | no  |
| russia | african swine fever virus             | Virus    | no  | no  | no  |
| russia | bacillus mojavensis                   | Bacteria | no  | no  | no  |
| russia | human immunodeficiency virus 1        | Virus    | yes | no  | yes |
| russia | streptococcus agalactiae              | Bacteria | yes | yes | no  |
| russia | achromobacter xylooxidans             | Bacteria | yes | no  | no  |
| russia | wickerhamomyces anomalus              | Fungi    | no  | no  | no  |
| russia | candida glabrata                      | Fungi    | yes | yes | yes |
| russia | anaplasma phagocytophilum             | Bacteria | no  | no  | no  |
| russia | escherichia coli                      | Bacteria | yes | yes | yes |
| russia | severe acute respiratory syndrome-rel | Virus    | no  | no  | no  |
| russia | babesia divergens                     | Protozoa | yes | yes | no  |
| russia | aspergillus versicolor                | Fungi    | yes | no  | no  |
| russia | trichinella spiralis                  | Helminth | yes | yes | yes |
| russia | bacillus amyloliquefaciens            | Bacteria | no  | no  | no  |
| russia | cyathocephalus truncatus              | Helminth | no  | no  | no  |
| russia | anaplasma bovis                       | Bacteria | no  | no  | no  |
| russia | enterobacter aerogenes                | Bacteria | yes | yes | no  |
| russia | arthrobacter oxydans                  | Bacteria | no  | no  | no  |
| russia | hepatitis b virus                     | Virus    | yes | no  | yes |
| russia | candida albicans                      | Fungi    | yes | yes | yes |
| russia | human herpesvirus 3                   | Virus    | no  | no  | no  |
| russia | pseudomonas stutzeri                  | Bacteria | yes | no  | no  |
| russia | yersinia pestis                       | Bacteria | yes | yes | yes |
| russia | aleutian mink disease virus           | Virus    | no  | no  | no  |
| russia | jc polyomavirus                       | Virus    | no  | no  | no  |
| russia | yersinia pseudotuberculosis           | Bacteria | yes | yes | no  |
| russia | norwalk virus                         | Virus    | yes | no  | yes |
| russia | microbacterium paraoxydans            | Bacteria | no  | no  | no  |
| russia | human immunodeficiency virus 2        | Virus    | yes | no  | yes |
| russia | human astrovirus                      | Virus    | yes | no  | yes |
| russia | west Nile virus                       | Virus    | yes | yes | yes |
| russia | bacillus megaterium                   | Bacteria | no  | no  | no  |
| russia | feline immunodeficiency virus         | Virus    | no  | no  | no  |
| russia | borrelia burgdorferi                  | Bacteria | yes | yes | yes |
| russia | aspergillus sydowii                   | Fungi    | no  | no  | no  |
| russia | nitzschia sturionis                   | Helminth | no  | no  | no  |

|        |                                      |          |     |     |     |
|--------|--------------------------------------|----------|-----|-----|-----|
| russia | serratia marcescens                  | Bacteria | yes | yes | yes |
| russia | schizophyllum commune                | Fungi    | yes | no  | no  |
| russia | paranoplocephala blanchardi          | Helminth | no  | no  | no  |
| russia | trichobilharzia szidati              | Helminth | no  | no  | no  |
| russia | fusarium oxysporum                   | Fungi    | yes | no  | yes |
| russia | cladosporium cladosporioides         | Fungi    | yes | no  | no  |
| russia | hantaan virus                        | Virus    | yes | yes | yes |
| russia | human enterovirus c                  | Virus    | yes | no  | no  |
| russia | anoplocephaloides lemmi              | Helminth | no  | no  | no  |
| russia | avian leukosis virus                 | Virus    | no  | no  | no  |
| russia | human herpesvirus 8                  | Virus    | yes | no  | yes |
| russia | spring viraemia of carp virus        | Virus    | no  | no  | no  |
| russia | alocreadium isoporum                 | Helminth | no  | no  | no  |
| russia | corynebacterium diphtheriae          | Bacteria | yes | no  | yes |
| russia | comamonas testosteroni               | Bacteria | yes | no  | no  |
| russia | xanthomonas campestris               | Bacteria | no  | no  | no  |
| russia | tula virus                           | Virus    | no  | no  | no  |
| russia | salmonella enterica                  | Bacteria | no  | no  | no  |
| russia | getah virus                          | Virus    | yes | yes | no  |
| russia | bunyamwera virus                     | Virus    | yes | yes | no  |
| russia | porcine epidemic diarrhea virus      | Virus    | no  | no  | no  |
| russia | catenotaenia cricetuli               | Helminth | no  | no  | no  |
| russia | pseudomonas aeruginosa               | Bacteria | yes | yes | yes |
| russia | serratia liquefaciens                | Bacteria | no  | no  | no  |
| russia | rotavirus c                          | Virus    | yes | yes | yes |
| russia | neisseria meningitidis               | Bacteria | yes | no  | yes |
| russia | catenotaenia apodemi                 | Helminth | no  | no  | no  |
| russia | candida parapsilosis                 | Fungi    | yes | yes | no  |
| russia | human enterovirus b                  | Virus    | yes | no  | yes |
| russia | streptococcus pyogenes               | Bacteria | yes | yes | yes |
| russia | ehrlichia muris                      | Bacteria | no  | no  | no  |
| russia | enterococcus faecium                 | Bacteria | yes | yes | yes |
| russia | brevundimonas diminuta               | Bacteria | yes | no  | no  |
| russia | bacillus thuringiensis               | Bacteria | yes | no  | no  |
| russia | acinetobacter baumannii              | Bacteria | yes | no  | no  |
| russia | streptococcus suis                   | Bacteria | yes | yes | no  |
| russia | mycobacterium avium                  | Bacteria | yes | yes | yes |
| russia | primate t-lymphotropic virus 1       | Virus    | no  | no  | no  |
| russia | hepatitis delta virus                | Virus    | yes | no  | no  |
| russia | bartonella grahamii                  | Bacteria | no  | no  | no  |
| russia | polyonchobothrium polypteri          | Helminth | no  | no  | no  |
| russia | caprine arthritis encephalitis virus | Virus    | no  | no  | no  |
| russia | pantoea agglomerans                  | Bacteria | yes | yes | no  |
| russia | echinococcus granulosus              | Helminth | yes | yes | yes |
| russia | rubella virus                        | Virus    | yes | no  | no  |
| russia | loma morhua                          | Fungi    | no  | no  | no  |
| russia | aureobasidium pullulans              | Fungi    | yes | no  | no  |
| russia | alcaligenes faecalis                 | Bacteria | no  | no  | no  |
| russia | leclercia adecarboxylata             | Bacteria | no  | no  | no  |
| russia | psychrobacter arcticus               | Bacteria | no  | no  | no  |

|                                  |                                |          |     |     |     |
|----------------------------------|--------------------------------|----------|-----|-----|-----|
| russia                           | mycobacterium terrae           | Bacteria | no  | no  | no  |
| russia                           | actinomyces ruminicola         | Bacteria | no  | no  | no  |
| rwanda                           | human immunodeficiency virus 2 | Virus    | yes | no  | yes |
| rwanda                           | hepatitis c virus              | Virus    | yes | no  | yes |
| rwanda                           | haemophilus ducreyi            | Bacteria | yes | no  | yes |
| rwanda                           | measles virus                  | Virus    | yes | yes | yes |
| rwanda                           | foot-and-mouth disease virus   | Virus    | no  | no  | no  |
| rwanda                           | neisseria gonorrhoeae          | Bacteria | yes | no  | yes |
| rwanda                           | hepatitis b virus              | Virus    | yes | no  | yes |
| rwanda                           | chlamydia trachomatis          | Bacteria | yes | yes | yes |
| rwanda                           | human immunodeficiency virus 1 | Virus    | yes | no  | yes |
| rwanda                           | xanthomonas campestris         | Bacteria | no  | no  | no  |
| rwanda                           | simian immunodeficiency virus  | Virus    | no  | no  | no  |
| rwanda                           | rickettsia prowazekii          | Bacteria | yes | yes | yes |
| saint helena                     | chlamydia trachomatis          | Bacteria | yes | yes | yes |
| saint helena                     | escherichia coli               | Bacteria | yes | yes | yes |
| saint kitts and nevi             | babesia caballi                | Protozoa | no  | no  | no  |
| saint kitts and nevi             | dengue virus                   | Virus    | no  | no  | no  |
| saint kitts and nevi             | theileria equi                 | Protozoa | no  | no  | no  |
| saint lucia                      | dengue virus                   | Virus    | no  | no  | no  |
| saint lucia                      | human immunodeficiency virus 1 | Virus    | yes | no  | yes |
| saint martin                     | human immunodeficiency virus 1 | Virus    | yes | no  | yes |
| saint martin                     | human immunodeficiency virus 1 | Virus    | yes | no  | yes |
| saint vincent and the grenadines | human immunodeficiency virus 1 | Virus    | yes | no  | yes |
| saint vincent and the grenadines | dengue virus                   | Virus    | no  | no  | no  |
| samoa                            | human immunodeficiency virus 1 | Virus    | yes | no  | yes |
| samoa                            | staphylococcus aureus          | Bacteria | yes | yes | yes |
| samoa                            | wuchereria bancrofti           | Helminth | yes | no  | yes |
| samoa                            | influenza a virus              | Virus    | yes | yes | yes |
| samoa                            | dengue virus                   | Virus    | no  | no  | no  |
| samoa                            | human immunodeficiency virus 2 | Virus    | yes | no  | yes |
| samoa                            | hepatitis b virus              | Virus    | yes | no  | yes |
| sao tome and principia           | plasmodium ovale               | Protozoa | yes | no  | no  |
| sao tome and principia           | plasmodium falciparum          | Protozoa | yes | no  | yes |
| sao tome and principia           | schistosoma intercalatum       | Helminth | yes | yes | no  |
| saudi arabia                     | aspergillus niger              | Fungi    | yes | yes | no  |
| saudi arabia                     | human parainfluenza virus 3    | Virus    | yes | no  | no  |
| saudi arabia                     | kyasanur forest disease virus  | Virus    | yes | yes | yes |
| saudi arabia                     | rhinocladiella mackenziei      | Fungi    | no  | no  | no  |
| saudi arabia                     | human adenovirus b             | Virus    | yes | no  | no  |
| saudi arabia                     | cryptosporidium hominis        | Protozoa | yes | no  | yes |
| saudi arabia                     | human herpesvirus 8            | Virus    | yes | no  | yes |
| saudi arabia                     | fasciola hepatica              | Helminth | yes | yes | no  |
| saudi arabia                     | leishmania tropica             | Protozoa | yes | yes | no  |
| saudi arabia                     | staphylococcus aureus          | Bacteria | yes | yes | yes |
| saudi arabia                     | influenza a virus              | Virus    | yes | yes | yes |
| saudi arabia                     | hepatitis c virus              | Virus    | yes | no  | yes |
| saudi arabia                     | pseudomonas aeruginosa         | Bacteria | yes | yes | yes |
| saudi arabia                     | brucella melitensis            | Bacteria | yes | yes | yes |
| saudi arabia                     | avian coronavirus              | Virus    | no  | no  | no  |



|              |                                   |          |     |     |     |
|--------------|-----------------------------------|----------|-----|-----|-----|
| saudi arabia | haemophilus influenzae            | Bacteria | yes | no  | yes |
| saudi arabia | peste-des-petits-ruminants virus  | Virus    | no  | no  | no  |
| saudi arabia | penicillium chrysogenum           | Fungi    | yes | no  | no  |
| saudi arabia | hepatitis a virus                 | Virus    | yes | yes | yes |
| saudi arabia | human adenovirus d                | Virus    | yes | no  | no  |
| saudi arabia | fusarium oxysporum                | Fungi    | yes | no  | yes |
| saudi arabia | rinderpest virus                  | Virus    | no  | no  | no  |
| saudi arabia | leishmania major                  | Protozoa | yes | yes | no  |
| saudi arabia | staphylococcus epidermidis        | Bacteria | yes | yes | yes |
| saudi arabia | alternaria alternata              | Fungi    | yes | yes | no  |
| saudi arabia | rotavirus a                       | Virus    | yes | yes | yes |
| saudi arabia | entamoeba histolytica             | Protozoa | yes | yes | no  |
| saudi arabia | streptococcus pneumoniae          | Bacteria | yes | yes | yes |
| saudi arabia | micrococcus luteus                | Bacteria | no  | no  | no  |
| saudi arabia | mucor circinelloides              | Fungi    | yes | yes | no  |
| saudi arabia | escherichia coli                  | Bacteria | yes | yes | yes |
| saudi arabia | streptococcus pyogenes            | Bacteria | yes | yes | yes |
| saudi arabia | helicobacter pylori               | Bacteria | yes | yes | no  |
| saudi arabia | cladosporium cladosporioides      | Fungi    | yes | no  | no  |
| saudi arabia | vaccinia virus                    | Virus    | no  | no  | no  |
| saudi arabia | lactobacillus acidophilus         | Bacteria | no  | no  | no  |
| saudi arabia | human respiratory syncytial virus | Virus    | yes | no  | no  |
| saudi arabia | newcastle disease virus           | Virus    | yes | yes | no  |
| saudi arabia | camelpox virus                    | Virus    | no  | no  | no  |
| saudi arabia | mycobacterium tuberculosis        | Bacteria | yes | yes | yes |
| saudi arabia | escherichia vulneris              | Bacteria | no  | no  | no  |
| saudi arabia | aspergillus flavus                | Fungi    | no  | no  | no  |
| saudi arabia | neisseria meningitidis            | Bacteria | yes | no  | yes |
| saudi arabia | rabies virus                      | Virus    | yes | yes | yes |
| saudi arabia | mucor hiemalis                    | Fungi    | yes | no  | no  |
| saudi arabia | bk polyomavirus                   | Virus    | no  | no  | no  |
| saudi arabia | trichoderma longibrachiatum       | Fungi    | no  | no  | no  |
| saudi arabia | jc polyomavirus                   | Virus    | no  | no  | no  |
| saudi arabia | cryptosporidium muris             | Protozoa | no  | no  | no  |
| saudi arabia | fusarium solani                   | Fungi    | yes | yes | yes |
| saudi arabia | human immunodeficiency virus 1    | Virus    | yes | no  | yes |
| saudi arabia | klebsiella pneumoniae             | Bacteria | yes | yes | yes |
| saudi arabia | human parainfluenza virus 2       | Virus    | yes | no  | no  |
| saudi arabia | rift valley fever virus           | Virus    | yes | yes | yes |
| saudi arabia | penicillium brevicompactum        | Fungi    | no  | no  | no  |
| saudi arabia | human immunodeficiency virus 2    | Virus    | yes | no  | yes |
| saudi arabia | rhizopus stolonifer               | Fungi    | yes | no  | no  |
| saudi arabia | dengue virus                      | Virus    | no  | no  | no  |
| saudi arabia | acinetobacter calcoaceticus       | Bacteria | yes | no  | no  |
| saudi arabia | beak and feather disease virus    | Virus    | no  | no  | no  |
| saudi arabia | toxoplasma gondii                 | Protozoa | yes | yes | yes |
| saudi arabia | hepatitis b virus                 | Virus    | yes | no  | yes |
| saudi arabia | mycobacterium riyadhense          | Bacteria | no  | no  | no  |
| saudi arabia | cryptosporidium parvum            | Protozoa | yes | yes | yes |
| saudi arabia | salmonella enterica               | Bacteria | no  | no  | no  |

|              |                                  |          |     |     |     |
|--------------|----------------------------------|----------|-----|-----|-----|
| saudi arabia | cryptosporidium meleagridis      | Protozoa | no  | no  | no  |
| saudi arabia | human enterovirus a              | Virus    | yes | no  | no  |
| saudi arabia | foot-and-mouth disease virus     | Virus    | no  | no  | no  |
| saudi arabia | leishmania donovani              | Protozoa | yes | yes | yes |
| saudi arabia | rhizopus oryzae                  | Fungi    | yes | yes | no  |
| senegal      | hepatitis b virus                | Virus    | yes | no  | yes |
| senegal      | influenza a virus                | Virus    | yes | yes | yes |
| senegal      | schistosoma bovis                | Helminth | yes | yes | no  |
| senegal      | mycobacterium tuberculosis       | Bacteria | yes | yes | yes |
| senegal      | schistosoma haematobium          | Helminth | yes | yes | no  |
| senegal      | hepatitis delta virus            | Virus    | yes | no  | no  |
| senegal      | salmonella enterica              | Bacteria | no  | no  | no  |
| senegal      | macrogyrodactylus heterobranchii | Helminth | no  | no  | no  |
| senegal      | trichophyton soudanense          | Fungi    | yes | no  | no  |
| senegal      | neisseria meningitidis           | Bacteria | yes | no  | yes |
| senegal      | ajellomyces capsulatus           | Fungi    | no  | no  | no  |
| senegal      | chikungunya virus                | Virus    | yes | yes | yes |
| senegal      | klebsiella pneumoniae            | Bacteria | yes | yes | yes |
| senegal      | vibrio cholerae                  | Bacteria | yes | no  | yes |
| senegal      | pseudomonas aeruginosa           | Bacteria | yes | yes | yes |
| senegal      | peste-des-petits-ruminants virus | Virus    | no  | no  | no  |
| senegal      | west nile virus                  | Virus    | yes | yes | yes |
| senegal      | feline immunodeficiency virus    | Virus    | no  | no  | no  |
| senegal      | plasmodium falciparum            | Protozoa | yes | no  | yes |
| senegal      | human immunodeficiency virus 2   | Virus    | yes | no  | yes |
| senegal      | fasciola gigantica               | Helminth | yes | yes | no  |
| senegal      | hepatitis c virus                | Virus    | yes | no  | yes |
| senegal      | rhinebothrium megacanthophallus  | Helminth | no  | no  | no  |
| senegal      | foot-and-mouth disease virus     | Virus    | no  | no  | no  |
| senegal      | haemophilus influenzae           | Bacteria | yes | no  | yes |
| senegal      | human immunodeficiency virus 1   | Virus    | yes | no  | yes |
| senegal      | streptococcus pneumoniae         | Bacteria | yes | yes | yes |
| senegal      | macrogyrodactylus congolensis    | Helminth | no  | no  | no  |
| senegal      | shigella dysenteriae             | Bacteria | yes | yes | yes |
| senegal      | yellow fever virus               | Virus    | yes | yes | yes |
| senegal      | staphylococcus aureus            | Bacteria | yes | yes | yes |
| senegal      | african swine fever virus        | Virus    | no  | no  | no  |
| senegal      | chlamydia trachomatis            | Bacteria | yes | yes | yes |
| senegal      | leishmania major                 | Protozoa | yes | yes | no  |
| senegal      | ralstonia pickettii              | Bacteria | yes | no  | no  |
| senegal      | helicobacter pylori              | Bacteria | yes | yes | no  |
| senegal      | lagos bat virus                  | Virus    | no  | no  | no  |
| senegal      | human herpesvirus 8              | Virus    | yes | no  | yes |
| senegal      | bunyamwera virus                 | Virus    | yes | yes | no  |
| senegal      | schistosoma mansoni              | Helminth | yes | yes | yes |
| senegal      | aspergillus terreus              | Fungi    | no  | no  | no  |
| senegal      | measles virus                    | Virus    | yes | yes | yes |
| senegal      | borrelia crocidurae              | Bacteria | yes | yes | no  |
| senegal      | simian immunodeficiency virus    | Virus    | no  | no  | no  |
| senegal      | shigella flexneri                | Bacteria | yes | yes | no  |

|              |                                         |          |     |     |     |
|--------------|-----------------------------------------|----------|-----|-----|-----|
| senegal      | dengue virus                            | Virus    | no  | no  | no  |
| senegal      | escherichia coli                        | Bacteria | yes | yes | yes |
| senegal      | candida albicans                        | Fungi    | yes | yes | yes |
| senegal      | human enterovirus c                     | Virus    | yes | no  | no  |
| senegal      | rift valley fever virus                 | Virus    | yes | yes | yes |
| senegal      | neisseria gonorrhoeae                   | Bacteria | yes | no  | yes |
| serbia       | listonella anguillarum                  | Bacteria | no  | no  | no  |
| serbia       | human herpesvirus 4                     | Virus    | no  | no  | no  |
| serbia       | gibberella intermedia                   | Fungi    | no  | no  | no  |
| serbia       | lactobacillus gasseri                   | Bacteria | no  | no  | no  |
| serbia       | staphylococcus sciuri                   | Bacteria | no  | no  | no  |
| serbia       | lactobacillus casei                     | Bacteria | no  | no  | no  |
| serbia       | rickettsia monacensis                   | Bacteria | yes | no  | no  |
| serbia       | hepatitis e virus                       | Virus    | yes | yes | yes |
| serbia       | borrelia burgdorferi                    | Bacteria | yes | yes | yes |
| serbia       | epicoccum nigrum                        | Fungi    | no  | no  | no  |
| serbia       | human parvovirus b19                    | Virus    | no  | no  | no  |
| serbia       | borrelia afzelii                        | Bacteria | no  | no  | no  |
| serbia       | hepatitis b virus                       | Virus    | yes | no  | yes |
| serbia       | rickettsia helvetica                    | Bacteria | yes | no  | no  |
| serbia       | lactococcus lactis                      | Bacteria | no  | no  | no  |
| serbia       | lactobacillus plantarum                 | Bacteria | no  | no  | no  |
| serbia       | rabies virus                            | Virus    | yes | yes | yes |
| seychelles   | human immunodeficiency virus 1          | Virus    | yes | no  | yes |
| seychelles   | chikungunya virus                       | Virus    | yes | yes | yes |
| seychelles   | measles virus                           | Virus    | yes | yes | yes |
| seychelles   | trichomonas gallinae                    | Protozoa | no  | no  | no  |
| sierra leone | hepatitis a virus                       | Virus    | yes | yes | yes |
| sierra leone | measles virus                           | Virus    | yes | yes | yes |
| sierra leone | variola virus                           | Virus    | no  | no  | no  |
| sierra leone | human immunodeficiency virus 1          | Virus    | yes | no  | yes |
| sierra leone | peste-des-petits-ruminants virus        | Virus    | no  | no  | no  |
| sierra leone | hepatitis b virus                       | Virus    | yes | no  | yes |
| sierra leone | plasmodium falciparum                   | Protozoa | yes | no  | yes |
| sierra leone | haematoloechus floedae                  | Helminth | no  | no  | no  |
| sierra leone | lassa virus                             | Virus    | yes | yes | yes |
| sierra leone | simian immunodeficiency virus           | Virus    | no  | no  | no  |
| sierra leone | monkeypox virus                         | Virus    | yes | yes | yes |
| singapore    | mycoplasma pneumoniae                   | Bacteria | yes | no  | no  |
| singapore    | escherichia coli                        | Bacteria | yes | yes | yes |
| singapore    | aeromonas veronii                       | Bacteria | yes | no  | yes |
| singapore    | chikungunya virus                       | Virus    | yes | yes | yes |
| singapore    | japanese encephalitis virus             | Virus    | yes | yes | yes |
| singapore    | encephalomyocarditis virus              | Virus    | yes | yes | no  |
| singapore    | influenza a virus                       | Virus    | yes | yes | yes |
| singapore    | infectious spleen and kidney necrosis v | Virus    | no  | no  | no  |
| singapore    | staphylococcus aureus                   | Bacteria | yes | yes | yes |
| singapore    | pneumocystis carinii                    | Fungi    | yes | yes | yes |
| singapore    | human herpesvirus 1                     | Virus    | no  | no  | no  |
| singapore    | candida albicans                        | Fungi    | yes | yes | yes |

|           |                                       |          |     |     |     |
|-----------|---------------------------------------|----------|-----|-----|-----|
| singapore | mycobacterium tuberculosis            | Bacteria | yes | yes | yes |
| singapore | human enterovirus d                   | Virus    | yes | no  | no  |
| singapore | hepatitis c virus                     | Virus    | yes | no  | yes |
| singapore | legionella pneumophila                | Bacteria | yes | no  | yes |
| singapore | seoul virus                           | Virus    | yes | yes | yes |
| singapore | burkholderia pseudomallei             | Bacteria | yes | yes | no  |
| singapore | human herpesvirus 4                   | Virus    | no  | no  | no  |
| singapore | influenza b virus                     | Virus    | yes | yes | no  |
| singapore | neisseria meningitidis                | Bacteria | yes | no  | yes |
| singapore | staphylococcus lugdunensis            | Bacteria | yes | no  | no  |
| singapore | human herpesvirus 3                   | Virus    | no  | no  | no  |
| singapore | toxoplasma gondii                     | Protozoa | yes | yes | yes |
| singapore | pseudomonas putida                    | Bacteria | yes | no  | no  |
| singapore | foot-and-mouth disease virus          | Virus    | no  | no  | no  |
| singapore | hepatitis a virus                     | Virus    | yes | yes | yes |
| singapore | human enterovirus b                   | Virus    | yes | no  | yes |
| singapore | nipah virus                           | Virus    | yes | yes | yes |
| singapore | haemophilus influenzae                | Bacteria | yes | no  | yes |
| singapore | pseudomonas aeruginosa                | Bacteria | yes | yes | yes |
| singapore | vibrio parahaemolyticus               | Bacteria | yes | yes | yes |
| singapore | human adenovirus b                    | Virus    | yes | no  | no  |
| singapore | chlamydia trachomatis                 | Bacteria | yes | yes | yes |
| singapore | human respiratory syncytial virus     | Virus    | yes | no  | no  |
| singapore | chlamydophila pneumoniae              | Bacteria | yes | yes | no  |
| singapore | human immunodeficiency virus 1        | Virus    | yes | no  | yes |
| singapore | infectious bursal disease virus       | Virus    | no  | no  | no  |
| singapore | plasmodium vivax                      | Protozoa | yes | no  | yes |
| singapore | vibrio cholerae                       | Bacteria | yes | no  | yes |
| singapore | campylobacter jejuni                  | Bacteria | yes | yes | yes |
| singapore | klebsiella pneumoniae                 | Bacteria | yes | yes | yes |
| singapore | aeromonas hydrophila                  | Bacteria | yes | yes | yes |
| singapore | avian coronavirus                     | Virus    | no  | no  | no  |
| singapore | enterococcus faecium                  | Bacteria | yes | yes | yes |
| singapore | kluveria cryocrescens                 | Bacteria | yes | yes | no  |
| singapore | mumps virus                           | Virus    | yes | no  | no  |
| singapore | streptococcus pneumoniae              | Bacteria | yes | yes | yes |
| singapore | hepatitis b virus                     | Virus    | yes | no  | yes |
| singapore | clostridium difficile                 | Bacteria | yes | yes | yes |
| singapore | salmonella enterica                   | Bacteria | no  | no  | no  |
| singapore | helicobacter pylori                   | Bacteria | yes | yes | no  |
| singapore | mycobacterium lepromatosis            | Bacteria | no  | no  | no  |
| singapore | saccharomyces cerevisiae              | Fungi    | yes | no  | no  |
| singapore | streptococcus agalactiae              | Bacteria | yes | yes | no  |
| singapore | acinetobacter baumannii               | Bacteria | yes | no  | no  |
| singapore | human enterovirus a                   | Virus    | yes | no  | no  |
| singapore | plasmodium falciparum                 | Protozoa | yes | no  | yes |
| singapore | lysiniibacillus sphaericus            | Bacteria | no  | no  | no  |
| singapore | severe acute respiratory syndrome-rel | Virus    | no  | no  | no  |
| singapore | dengue virus                          | Virus    | no  | no  | no  |
| singapore | human immunodeficiency virus 2        | Virus    | yes | no  | yes |

|           |                                        |          |     |     |     |
|-----------|----------------------------------------|----------|-----|-----|-----|
| singapore | spirometra erinaceieuropaei            | Helminth | no  | no  | no  |
| singapore | cryptococcus neoformans                | Fungi    | yes | yes | yes |
| singapore | enterococcus faecalis                  | Bacteria | yes | yes | yes |
| singapore | human enterovirus c                    | Virus    | yes | no  | no  |
| singapore | newcastle disease virus                | Virus    | yes | yes | no  |
| singapore | human metapneumovirus                  | Virus    | no  | no  | no  |
| singapore | neisseria gonorrhoeae                  | Bacteria | yes | no  | yes |
| slovakia  | pseudomonas fluorescens                | Bacteria | yes | no  | no  |
| slovakia  | khawia sinensis                        | Helminth | no  | no  | no  |
| slovakia  | enterobacter ludwigii                  | Bacteria | no  | no  | no  |
| slovakia  | borrelia afzelii                       | Bacteria | no  | no  | no  |
| slovakia  | atractolytocestus huronensis           | Helminth | no  | no  | no  |
| slovakia  | taenia taeniaeformis                   | Helminth | yes | yes | no  |
| slovakia  | streptococcus pneumoniae               | Bacteria | yes | yes | yes |
| slovakia  | pseudomonas plecoglossicida            | Bacteria | no  | no  | no  |
| slovakia  | geomyces destructans                   | Fungi    | no  | no  | no  |
| slovakia  | stenotrophomonas maltophilia           | Bacteria | no  | no  | no  |
| slovakia  | gyrodactylus hrabei                    | Helminth | no  | no  | no  |
| slovakia  | puumala virus                          | Virus    | yes | yes | yes |
| slovakia  | porcine reproductive and respiratory s | Virus    | no  | no  | no  |
| slovakia  | echinococcus canadensis                | Helminth | no  | no  | no  |
| slovakia  | pseudomonas brenneri                   | Bacteria | no  | no  | no  |
| slovakia  | human immunodeficiency virus 1         | Virus    | yes | no  | yes |
| slovakia  | echinococcus granulosus                | Helminth | yes | yes | yes |
| slovakia  | microbacterium oxydans                 | Bacteria | no  | no  | no  |
| slovakia  | trichoderma longibrachiatum            | Fungi    | no  | no  | no  |
| slovakia  | murid herpesvirus 4                    | Virus    | no  | no  | no  |
| slovakia  | neospora caninum                       | Protozoa | no  | no  | no  |
| slovakia  | aerococcus viridans                    | Bacteria | yes | no  | no  |
| slovakia  | torque teno sus virus 2                | Virus    | no  | no  | no  |
| slovakia  | pseudomonas putida                     | Bacteria | yes | no  | no  |
| slovakia  | gyrodactylus thymalli                  | Helminth | no  | no  | no  |
| slovakia  | fascioloides magna                     | Helminth | no  | no  | no  |
| slovakia  | babesia canis                          | Protozoa | no  | no  | no  |
| slovakia  | enterobacter cloacae                   | Bacteria | yes | yes | no  |
| slovakia  | torque teno sus virus 1                | Virus    | no  | no  | no  |
| slovakia  | human herpesvirus 1                    | Virus    | no  | no  | no  |
| slovakia  | borrelia burgdorferi                   | Bacteria | yes | yes | yes |
| slovakia  | mycobacterium avium                    | Bacteria | yes | yes | yes |
| slovakia  | bacillus megaterium                    | Bacteria | no  | no  | no  |
| slovakia  | borrelia garinii                       | Bacteria | no  | no  | no  |
| slovakia  | budgerigar fledgling disease polyomav  | Virus    | no  | no  | no  |
| slovakia  | enterobacter amnigenus                 | Bacteria | yes | yes | no  |
| slovakia  | trypanosoma avium                      | Protozoa | no  | no  | no  |
| slovakia  | achromobacter xylosoxidans             | Bacteria | yes | no  | no  |
| slovakia  | nosema ceranae                         | Fungi    | no  | no  | no  |
| slovakia  | mesocestoides litteratus               | Helminth | no  | no  | no  |
| slovakia  | acinetobacter calcoaceticus            | Bacteria | yes | no  | no  |
| slovakia  | mesocestoides lineatus                 | Helminth | yes | yes | no  |
| slovakia  | escherichia coli                       | Bacteria | yes | yes | yes |

|                 |                                         |          |     |     |     |
|-----------------|-----------------------------------------|----------|-----|-----|-----|
| slovakia        | heligmosomoides polygyrus               | Helminth | no  | no  | no  |
| slovakia        | dobrava-belgrade virus                  | Virus    | yes | yes | no  |
| slovakia        | human enterovirus a                     | Virus    | yes | no  | no  |
| slovakia        | classical swine fever virus             | Virus    | no  | no  | no  |
| slovakia        | influenza a virus                       | Virus    | yes | yes | yes |
| slovakia        | echinococcus multilocularis             | Helminth | yes | yes | no  |
| slovenia        | human adenovirus d                      | Virus    | yes | no  | no  |
| slovenia        | cryptosporidium parvum                  | Protozoa | yes | yes | yes |
| slovenia        | borrelia afzelii                        | Bacteria | no  | no  | no  |
| slovenia        | clostridium difficile                   | Bacteria | yes | yes | yes |
| slovenia        | human papillomavirus 6                  | Virus    | no  | no  | no  |
| slovenia        | molluscum contagiosum virus             | Virus    | yes | no  | no  |
| slovenia        | caprine arthritis encephalitis virus    | Virus    | no  | no  | no  |
| slovenia        | influenza a virus                       | Virus    | yes | yes | yes |
| slovenia        | heligmosomoides polygyrus               | Helminth | no  | no  | no  |
| slovenia        | campylobacter coli                      | Bacteria | yes | yes | no  |
| slovenia        | dobrava-belgrade virus                  | Virus    | yes | yes | no  |
| slovenia        | staphylococcus aureus                   | Bacteria | yes | yes | yes |
| slovenia        | human papillomavirus 5                  | Virus    | no  | no  | no  |
| slovenia        | measles virus                           | Virus    | yes | yes | yes |
| slovenia        | hepatitis e virus                       | Virus    | yes | yes | yes |
| slovenia        | botryosphaeria dothidea                 | Fungi    | no  | no  | no  |
| slovenia        | norwalk virus                           | Virus    | yes | no  | yes |
| slovenia        | mycoplasma synoviae                     | Bacteria | no  | no  | no  |
| slovenia        | vibrio parahaemolyticus                 | Bacteria | yes | yes | yes |
| slovenia        | babesia microti                         | Protozoa | yes | yes | yes |
| slovenia        | infectious hematopoietic necrosis virus | Virus    | no  | no  | no  |
| slovenia        | butyrivibrio fibrisolvens               | Bacteria | no  | no  | no  |
| slovenia        | avian coronavirus                       | Virus    | no  | no  | no  |
| slovenia        | kyasanur forest disease virus           | Virus    | yes | yes | yes |
| slovenia        | rotavirus a                             | Virus    | yes | yes | yes |
| slovenia        | human immunodeficiency virus 1          | Virus    | yes | no  | yes |
| slovenia        | pseudobutyrvibrio xylanivorans          | Bacteria | no  | no  | no  |
| slovenia        | borrelia burgdorferi                    | Bacteria | yes | yes | yes |
| slovenia        | trichoderma atroviride                  | Fungi    | no  | no  | no  |
| slovenia        | cladosporium oxysporum                  | Fungi    | yes | no  | no  |
| slovenia        | nosema ceranae                          | Fungi    | no  | no  | no  |
| slovenia        | tick-borne encephalitis virus           | Virus    | no  | no  | no  |
| slovenia        | fowl adenovirus e                       | Virus    | no  | no  | no  |
| slovenia        | borrelia garinii                        | Bacteria | no  | no  | no  |
| slovenia        | hortaea werneckii                       | Fungi    | yes | no  | no  |
| slovenia        | cladosporium cladosporioides            | Fungi    | yes | no  | no  |
| slovenia        | human herpesvirus 4                     | Virus    | no  | no  | no  |
| slovenia        | anaplasma phagocytophilum               | Bacteria | no  | no  | no  |
| slovenia        | cryptosporidium hominis                 | Protozoa | yes | no  | yes |
| slovenia        | babesia canis                           | Protozoa | no  | no  | no  |
| solomon islands | dengue virus                            | Virus    | no  | no  | no  |
| solomon islands | influenza b virus                       | Virus    | yes | yes | no  |
| solomon islands | influenza a virus                       | Virus    | yes | yes | yes |
| solomon islands | human immunodeficiency virus 2          | Virus    | yes | no  | yes |

|                 |                                       |          |     |     |     |
|-----------------|---------------------------------------|----------|-----|-----|-----|
| solomon islands | human immunodeficiency virus 1        | Virus    | yes | no  | yes |
| solomon islands | hepatitis b virus                     | Virus    | yes | no  | yes |
| solomon islands | jc polyomavirus                       | Virus    | no  | no  | no  |
| solomon islands | human herpesvirus 8                   | Virus    | yes | no  | yes |
| solomon islands | primate t-lymphotropic virus 1        | Virus    | no  | no  | no  |
| solomon islands | escherichia coli                      | Bacteria | yes | yes | yes |
| solomon islands | plasmodium vivax                      | Protozoa | yes | no  | yes |
| solomon islands | wuchereria bancrofti                  | Helminth | yes | no  | yes |
| solomon islands | plasmodium falciparum                 | Protozoa | yes | no  | yes |
| somalia         | mycobacterium bovis                   | Bacteria | yes | yes | yes |
| somalia         | camelpox virus                        | Virus    | no  | no  | no  |
| somalia         | hepatitis b virus                     | Virus    | yes | no  | yes |
| somalia         | hepatitis c virus                     | Virus    | yes | no  | yes |
| somalia         | variola virus                         | Virus    | no  | no  | no  |
| somalia         | human enterovirus c                   | Virus    | yes | no  | no  |
| somalia         | hepatitis delta virus                 | Virus    | yes | no  | no  |
| somalia         | measles virus                         | Virus    | yes | yes | yes |
| somalia         | entamoeba polecki                     | Protozoa | yes | yes | no  |
| somalia         | human immunodeficiency virus 1        | Virus    | yes | no  | yes |
| somalia         | escherichia coli                      | Bacteria | yes | yes | yes |
| somalia         | human immunodeficiency virus 2        | Virus    | yes | no  | yes |
| somalia         | california encephalitis virus         | Virus    | yes | yes | yes |
| south africa    | duck hepatitis b virus                | Virus    | no  | no  | no  |
| south africa    | human enterovirus c                   | Virus    | yes | no  | no  |
| south africa    | chicken astrovirus                    | Virus    | no  | no  | no  |
| south africa    | cryptococcus gattii                   | Fungi    | no  | no  | no  |
| south africa    | helicobacter pylori                   | Bacteria | yes | yes | no  |
| south africa    | fusarium solani                       | Fungi    | yes | yes | yes |
| south africa    | human papillomavirus 18               | Virus    | no  | no  | no  |
| south africa    | feline immunodeficiency virus         | Virus    | no  | no  | no  |
| south africa    | alphacoronavirus 1                    | Virus    | no  | no  | no  |
| south africa    | haemophilus parainfluenzae            | Bacteria | yes | no  | no  |
| south africa    | babesia felis                         | Protozoa | no  | no  | no  |
| south africa    | sporothrix schenckii                  | Fungi    | yes | yes | no  |
| south africa    | listeria monocytogenes                | Bacteria | yes | yes | yes |
| south africa    | avian paramyxovirus 4                 | Virus    | no  | no  | no  |
| south africa    | ehrlichia ruminantium                 | Bacteria | no  | no  | no  |
| south africa    | shigella dysenteriae                  | Bacteria | yes | yes | yes |
| south africa    | vibrio cholerae                       | Bacteria | yes | no  | yes |
| south africa    | myrmecridium schulzeri                | Fungi    | no  | no  | no  |
| south africa    | staphylococcus saprophyticus          | Bacteria | yes | no  | no  |
| south africa    | spirocerca lupi                       | Helminth | yes | yes | no  |
| south africa    | carnobacterium divergens              | Bacteria | no  | no  | no  |
| south africa    | jaagsiekte sheep retrovirus           | Virus    | no  | no  | no  |
| south africa    | babesia caballi                       | Protozoa | no  | no  | no  |
| south africa    | mycoplasma haemofelis                 | Bacteria | no  | no  | no  |
| south africa    | gyrodactylus eyipayipi                | Helminth | no  | no  | no  |
| south africa    | gyrodactylus ulinganisus              | Helminth | no  | no  | no  |
| south africa    | crimean-congo hemorrhagic fever virus | Virus    | no  | no  | no  |
| south africa    | cryptococcus neoformans               | Fungi    | yes | yes | yes |

|              |                              |          |     |     |     |
|--------------|------------------------------|----------|-----|-----|-----|
| south africa | necator americanus           | Helminth | yes | yes | no  |
| south africa | gallid herpesvirus 2         | Virus    | no  | no  | no  |
| south africa | avibacterium paragallinarum  | Bacteria | no  | no  | no  |
| south africa | cryptosporidium parvum       | Protozoa | yes | yes | yes |
| south africa | trichomonas vaginalis        | Protozoa | yes | no  | yes |
| south africa | foot-and-mouth disease virus | Virus    | no  | no  | no  |
| south africa | salmonella enterica          | Bacteria | no  | no  | no  |
| south africa | nocardia cyriacigeorgica     | Bacteria | no  | no  | no  |
| south africa | duvenhage virus              | Virus    | yes | yes | no  |
| south africa | plasmodium relictum          | Protozoa | no  | no  | no  |
| south africa | anaplasma ovis               | Bacteria | no  | no  | no  |
| south africa | malassezia slooffiae         | Fungi    | no  | no  | no  |
| south africa | hepatitis b virus            | Virus    | yes | no  | yes |
| south africa | bacillus licheniformis       | Bacteria | yes | yes | no  |
| south africa | schistosoma haematobium      | Helminth | yes | yes | no  |
| south africa | bacillus coagulans           | Bacteria | yes | yes | no  |
| south africa | eupolystoma vanasi           | Helminth | no  | no  | no  |
| south africa | influenza c virus            | Virus    | yes | yes | no  |
| south africa | neisseria gonorrhoeae        | Bacteria | yes | no  | yes |
| south africa | bacillus anthracis           | Bacteria | yes | yes | yes |
| south africa | streptococcus pneumoniae     | Bacteria | yes | yes | yes |
| south africa | bluetongue virus             | Virus    | no  | no  | no  |
| south africa | mycobacterium bovis          | Bacteria | yes | yes | yes |
| south africa | bk polyomavirus              | Virus    | no  | no  | no  |
| south africa | mycoplasma mycoides          | Bacteria | no  | no  | no  |
| south africa | newcastle disease virus      | Virus    | yes | yes | no  |
| south africa | ophiostoma stenoceras        | Fungi    | no  | no  | no  |
| south africa | rift valley fever virus      | Virus    | yes | yes | yes |
| south africa | pneumocystis jirovecii       | Fungi    | no  | no  | no  |
| south africa | plasmodium falciparum        | Protozoa | yes | no  | yes |
| south africa | human papillomavirus 16      | Virus    | no  | no  | no  |
| south africa | ascaris lumbricoides         | Helminth | yes | yes | no  |
| south africa | anisakis ziphidarum          | Helminth | no  | no  | no  |
| south africa | polystoma dawiekoki          | Helminth | no  | no  | no  |
| south africa | pseudodactylogyrus anguillae | Helminth | no  | no  | no  |
| south africa | cylindrocladiella peruviana  | Fungi    | no  | no  | no  |
| south africa | african swine fever virus    | Virus    | no  | no  | no  |
| south africa | contraecum ogmorhini         | Helminth | no  | no  | no  |
| south africa | west nile virus              | Virus    | yes | yes | yes |
| south africa | colletotrichum dematium      | Fungi    | yes | no  | no  |
| south africa | human metapneumovirus        | Virus    | no  | no  | no  |
| south africa | burkholderia tropica         | Bacteria | no  | no  | no  |
| south africa | acholeplasma laidlawii       | Bacteria | no  | no  | no  |
| south africa | rabies virus                 | Virus    | yes | yes | yes |
| south africa | nocardia nova                | Bacteria | yes | yes | no  |
| south africa | nocardia farcinica           | Bacteria | yes | yes | no  |
| south africa | schizophyllum commune        | Fungi    | yes | no  | no  |
| south africa | chlamydia trachomatis        | Bacteria | yes | yes | yes |
| south africa | lactobacillus brevis         | Bacteria | no  | no  | no  |
| south africa | trichinella zimbabwensis     | Helminth | no  | no  | no  |



|              |                                |          |     |     |     |
|--------------|--------------------------------|----------|-----|-----|-----|
| south africa | influenza b virus              | Virus    | yes | yes | no  |
| south africa | anguillicoloides papernai      | Helminth | no  | no  | no  |
| south africa | neisseria meningitidis         | Bacteria | yes | no  | yes |
| south africa | jc polyomavirus                | Virus    | no  | no  | no  |
| south africa | aeromonas veronii              | Bacteria | yes | no  | yes |
| south africa | agrobacterium tumefaciens      | Bacteria | no  | no  | no  |
| south africa | acanthamoeba lenticulata       | Protozoa | no  | no  | no  |
| south africa | babesia rossi                  | Protozoa | no  | no  | no  |
| south africa | helicobacter cinaedi           | Bacteria | yes | no  | no  |
| south africa | trichuris trichiura            | Helminth | yes | yes | no  |
| south africa | polystoma australis            | Helminth | no  | no  | no  |
| south africa | schistosoma hippopotami        | Helminth | no  | no  | no  |
| south africa | babesia leo                    | Protozoa | no  | no  | no  |
| south africa | human astrovirus               | Virus    | yes | no  | yes |
| south africa | cordyceps bassiana             | Fungi    | no  | no  | no  |
| south africa | providencia rettgeri           | Bacteria | yes | yes | no  |
| south africa | hepatitis c virus              | Virus    | yes | no  | yes |
| south africa | fowl adenovirus e              | Virus    | no  | no  | no  |
| south africa | primate t-lymphotropic virus 1 | Virus    | no  | no  | no  |
| south africa | arthrographis kalrae           | Fungi    | no  | no  | no  |
| south africa | ajellomyces capsulatus         | Fungi    | no  | no  | no  |
| south africa | beak and feather disease virus | Virus    | no  | no  | no  |
| south africa | kluveromyces marxianus         | Fungi    | no  | no  | no  |
| south africa | brucella canis                 | Bacteria | yes | yes | no  |
| south africa | botryosphaeria rhodina         | Fungi    | no  | no  | no  |
| south africa | candida albicans               | Fungi    | yes | yes | yes |
| south africa | cladosporium cladosporioides   | Fungi    | yes | no  | no  |
| south africa | classical swine fever virus    | Virus    | no  | no  | no  |
| south africa | human adenovirus f             | Virus    | yes | no  | no  |
| south africa | rubella virus                  | Virus    | yes | no  | no  |
| south africa | botryosphaeria dothidea        | Fungi    | no  | no  | no  |
| south africa | human adenovirus c             | Virus    | yes | no  | no  |
| south africa | actinomucor elegans            | Fungi    | no  | no  | no  |
| south africa | fusarium subglutinans          | Fungi    | yes | no  | no  |
| south africa | staphylococcus aureus          | Bacteria | yes | yes | yes |
| south africa | human herpesvirus 8            | Virus    | yes | no  | yes |
| south africa | anaplasma marginale            | Bacteria | no  | no  | no  |
| south africa | nocardia exalbida              | Bacteria | no  | no  | no  |
| south africa | saccharomyces cerevisiae       | Fungi    | yes | no  | no  |
| south africa | hepatitis e virus              | Virus    | yes | yes | yes |
| south africa | polystoma umthakathi           | Helminth | no  | no  | no  |
| south africa | polystoma testimagna           | Helminth | no  | no  | no  |
| south africa | pseudomonas aeruginosa         | Bacteria | yes | yes | yes |
| south africa | polystoma marmorati            | Helminth | no  | no  | no  |
| south africa | xanthomonas campestris         | Bacteria | no  | no  | no  |
| south africa | usutu virus                    | Virus    | yes | yes | no  |
| south africa | ovine herpesvirus 2            | Virus    | no  | no  | no  |
| south africa | theileria parva                | Protozoa | no  | no  | no  |
| south africa | human immunodeficiency virus 1 | Virus    | yes | no  | yes |
| south africa | human immunodeficiency virus 2 | Virus    | yes | no  | yes |

|              |                                     |          |     |     |     |
|--------------|-------------------------------------|----------|-----|-----|-----|
| south africa | human papillomavirus 6              | Virus    | no  | no  | no  |
| south africa | butyrivibrio hungatei               | Bacteria | no  | no  | no  |
| south africa | klebsiella pneumoniae               | Bacteria | yes | yes | yes |
| south africa | lumpy skin disease virus            | Virus    | no  | no  | no  |
| south africa | bacillus circulans                  | Bacteria | yes | no  | no  |
| south africa | fusarium oxysporum                  | Fungi    | yes | no  | yes |
| south africa | human herpesvirus 2                 | Virus    | no  | no  | no  |
| south africa | infectious bursal disease virus     | Virus    | no  | no  | no  |
| south africa | anaplasma centrale                  | Bacteria | no  | no  | no  |
| south africa | human respiratory syncytial virus   | Virus    | yes | no  | no  |
| south africa | nocardia brasiliensis               | Bacteria | yes | yes | no  |
| south africa | clavospora lusitaniae               | Fungi    | no  | no  | no  |
| south africa | nocardia otitidiscaviarum           | Bacteria | yes | yes | no  |
| south africa | escherichia coli                    | Bacteria | yes | yes | yes |
| south africa | butyrivibrio fibrisolvens           | Bacteria | no  | no  | no  |
| south africa | norwalk virus                       | Virus    | yes | no  | yes |
| south africa | influenza a virus                   | Virus    | yes | yes | yes |
| south africa | mycobacterium tuberculosis          | Bacteria | yes | yes | yes |
| south africa | middelburg virus                    | Virus    | no  | no  | no  |
| south africa | pantoea agglomerans                 | Bacteria | yes | yes | no  |
| south africa | epizootic hemorrhagic disease virus | Virus    | no  | no  | no  |
| south africa | human adenovirus d                  | Virus    | yes | no  | no  |
| south africa | measles virus                       | Virus    | yes | yes | yes |
| south africa | nematodirus spathiger               | Helminth | no  | no  | no  |
| south africa | schistosoma mansoni                 | Helminth | yes | yes | yes |
| south africa | mokola virus                        | Virus    | yes | yes | no  |
| south africa | fowl adenovirus d                   | Virus    | no  | no  | no  |
| south africa | human papillomavirus 53             | Virus    | no  | no  | no  |
| south africa | haemophilus influenzae              | Bacteria | yes | no  | yes |
| south africa | protopolystoma xenopodis            | Helminth | no  | no  | no  |
| south africa | rotavirus a                         | Virus    | yes | yes | yes |
| south africa | lagos bat virus                     | Virus    | no  | no  | no  |
| south africa | bacillus thuringiensis              | Bacteria | yes | no  | no  |
| south africa | pseudobutyrvibrio xylanivorans      | Bacteria | no  | no  | no  |
| south korea  | gibberella intermedia               | Fungi    | no  | no  | no  |
| south korea  | human herpesvirus 5                 | Virus    | yes | no  | yes |
| south korea  | babesia microti                     | Protozoa | yes | yes | yes |
| south korea  | fowl adenovirus d                   | Virus    | no  | no  | no  |
| south korea  | hepatitis a virus                   | Virus    | yes | yes | yes |
| south korea  | lactobacillus casei                 | Bacteria | no  | no  | no  |
| south korea  | riemerella anatipestifer            | Bacteria | no  | no  | no  |
| south korea  | border disease virus                | Virus    | no  | no  | no  |
| south korea  | micrococcus luteus                  | Bacteria | no  | no  | no  |
| south korea  | streptococcus iniae                 | Bacteria | no  | no  | no  |
| south korea  | rotavirus a                         | Virus    | yes | yes | yes |
| south korea  | human herpesvirus 3                 | Virus    | no  | no  | no  |
| south korea  | dengue virus                        | Virus    | no  | no  | no  |
| south korea  | torque teno sus virus 1             | Virus    | no  | no  | no  |
| south korea  | borrelia valaisiana                 | Bacteria | no  | no  | no  |
| south korea  | brachyspira murdochii               | Bacteria | no  | no  | no  |

|             |                                         |          |     |     |     |
|-------------|-----------------------------------------|----------|-----|-----|-----|
| south korea | weissella confusa                       | Bacteria | no  | no  | no  |
| south korea | human adenovirus e                      | Virus    | yes | no  | no  |
| south korea | microbacterium resistens                | Bacteria | no  | no  | no  |
| south korea | mammalian orthoreovirus                 | Virus    | no  | no  | no  |
| south korea | escherichia coli                        | Bacteria | yes | yes | yes |
| south korea | cephalotheca foveolata                  | Fungi    | no  | no  | no  |
| south korea | theileria equi                          | Protozoa | no  | no  | no  |
| south korea | human papillomavirus 16                 | Virus    | no  | no  | no  |
| south korea | rhodococcus erythropolis                | Bacteria | yes | no  | no  |
| south korea | rickettsia felis                        | Bacteria | yes | yes | no  |
| south korea | lactobacillus brevis                    | Bacteria | no  | no  | no  |
| south korea | burkholderia cepacia                    | Bacteria | yes | no  | no  |
| south korea | pseudocohnilembus persalinus            | Protozoa | no  | no  | no  |
| south korea | borrelia garinii                        | Bacteria | no  | no  | no  |
| south korea | infectious hematopoietic necrosis virus | Virus    | no  | no  | no  |
| south korea | avian paramyxovirus 4                   | Virus    | no  | no  | no  |
| south korea | lactococcus lactis                      | Bacteria | no  | no  | no  |
| south korea | enterobacter asburiae                   | Bacteria | yes | yes | no  |
| south korea | streptococcus pneumoniae                | Bacteria | yes | yes | yes |
| south korea | feline panleukopenia virus              | Virus    | no  | no  | no  |
| south korea | microbacterium oxydans                  | Bacteria | no  | no  | no  |
| south korea | viral hemorrhagic septicemia virus      | Virus    | no  | no  | no  |
| south korea | lactobacillus sakei                     | Bacteria | no  | no  | no  |
| south korea | bacillus anthracis                      | Bacteria | yes | yes | yes |
| south korea | pseudocohnilembus hargisi               | Protozoa | no  | no  | no  |
| south korea | anaplasma bovis                         | Bacteria | no  | no  | no  |
| south korea | mycobacterium abscessus                 | Bacteria | yes | yes | no  |
| south korea | borrelia afzelii                        | Bacteria | no  | no  | no  |
| south korea | theileria sergenti                      | Protozoa | no  | no  | no  |
| south korea | fusarium solani                         | Fungi    | yes | yes | yes |
| south korea | streptococcus dysgalactiae              | Bacteria | no  | no  | no  |
| south korea | bovine leukemia virus                   | Virus    | no  | no  | no  |
| south korea | staphylococcus succinus                 | Bacteria | no  | no  | no  |
| south korea | weissella cibaria                       | Bacteria | no  | no  | no  |
| south korea | hepatitis e virus                       | Virus    | yes | yes | yes |
| south korea | bacillus sonorensis                     | Bacteria | no  | no  | no  |
| south korea | norwalk virus                           | Virus    | yes | no  | yes |
| south korea | bk polyomavirus                         | Virus    | no  | no  | no  |
| south korea | human enterovirus a                     | Virus    | yes | no  | no  |
| south korea | penicillium citrinum                    | Fungi    | yes | no  | no  |
| south korea | paragonimus westermani                  | Helminth | yes | yes | no  |
| south korea | dipodascus capitatus                    | Fungi    | no  | no  | no  |
| south korea | human coronavirus nl63                  | Virus    | no  | no  | no  |
| south korea | arthrobacter woluwensis                 | Bacteria | no  | no  | no  |
| south korea | leptospira interrogans                  | Bacteria | yes | yes | yes |
| south korea | dugbe virus                             | Virus    | yes | yes | no  |
| south korea | lactobacillus reuteri                   | Bacteria | no  | no  | no  |
| south korea | influenza b virus                       | Virus    | yes | yes | no  |
| south korea | pseudomonas fluorescens                 | Bacteria | yes | no  | no  |
| south korea | gallid herpesvirus 2                    | Virus    | no  | no  | no  |

|             |                                         |          |     |     |     |
|-------------|-----------------------------------------|----------|-----|-----|-----|
| south korea | human metapneumovirus                   | Virus    | no  | no  | no  |
| south korea | suid herpesvirus 1                      | Virus    | no  | no  | no  |
| south korea | human herpesvirus 1                     | Virus    | no  | no  | no  |
| south korea | rinderpest virus                        | Virus    | no  | no  | no  |
| south korea | cyprinid herpesvirus 3                  | Virus    | no  | no  | no  |
| south korea | japanese encephalitis virus             | Virus    | yes | yes | yes |
| south korea | bacillus coagulans                      | Bacteria | yes | yes | no  |
| south korea | rabies virus                            | Virus    | yes | yes | yes |
| south korea | human respiratory syncytial virus       | Virus    | yes | no  | no  |
| south korea | human enterovirus c                     | Virus    | yes | no  | no  |
| south korea | newcastle disease virus                 | Virus    | yes | yes | no  |
| south korea | brevibacillus brevis                    | Bacteria | yes | no  | no  |
| south korea | flavobacterium johnsoniae               | Bacteria | no  | no  | no  |
| south korea | bacillus subtilis                       | Bacteria | yes | yes | no  |
| south korea | fowl adenovirus e                       | Virus    | no  | no  | no  |
| south korea | infectious bursal disease virus         | Virus    | no  | no  | no  |
| south korea | foot-and-mouth disease virus            | Virus    | no  | no  | no  |
| south korea | chlamydomyces pneumoniae                | Bacteria | yes | yes | no  |
| south korea | human rhinovirus c                      | Virus    | no  | no  | no  |
| south korea | leuconostoc citreum                     | Bacteria | no  | no  | no  |
| south korea | human rhinovirus a                      | Virus    | yes | no  | no  |
| south korea | salmonella enterica                     | Bacteria | no  | no  | no  |
| south korea | vibrio cholerae                         | Bacteria | yes | no  | yes |
| south korea | orientia tsutsugamushi                  | Bacteria | yes | yes | no  |
| south korea | chicken anemia virus                    | Virus    | no  | no  | no  |
| south korea | redspotted grouper nervous necrosis v   | Virus    | no  | no  | no  |
| south korea | leclercia adecarboxylata                | Bacteria | no  | no  | no  |
| south korea | bifidobacterium longum                  | Bacteria | no  | no  | no  |
| south korea | citrobacter braakii                     | Bacteria | yes | yes | no  |
| south korea | bothriocephalus acheilognathi           | Helminth | no  | no  | no  |
| south korea | bacillus amyloliquefaciens              | Bacteria | no  | no  | no  |
| south korea | leuconostoc pseudomesenteroides         | Bacteria | no  | no  | no  |
| south korea | bacillus cereus                         | Bacteria | yes | yes | no  |
| south korea | pentatrichomonas hominis                | Protozoa | yes | yes | no  |
| south korea | vibrio ichthyenteri                     | Bacteria | no  | no  | no  |
| south korea | staphylococcus sciuri                   | Bacteria | no  | no  | no  |
| south korea | trichoderma longibrachiatum             | Fungi    | no  | no  | no  |
| south korea | human enterovirus b                     | Virus    | yes | no  | yes |
| south korea | infectious spleen and kidney necrosis v | Virus    | no  | no  | no  |
| south korea | bacillus megaterium                     | Bacteria | no  | no  | no  |
| south korea | citrobacter freundii                    | Bacteria | yes | yes | no  |
| south korea | tick-borne encephalitis virus           | Virus    | no  | no  | no  |
| south korea | human parechovirus                      | Virus    | no  | no  | no  |
| south korea | cellulosimicrobium cellulans            | Bacteria | no  | no  | no  |
| south korea | tritrichomonas foetus                   | Protozoa | no  | no  | no  |
| south korea | enterobacter aerogenes                  | Bacteria | yes | yes | no  |
| south korea | pediococcus pentosaceus                 | Bacteria | no  | no  | no  |
| south korea | aeromonas salmonicida                   | Bacteria | no  | no  | no  |
| south korea | rhizopus oryzae                         | Fungi    | yes | yes | no  |
| south korea | rotavirus c                             | Virus    | yes | yes | yes |

|             |                                        |          |     |     |     |
|-------------|----------------------------------------|----------|-----|-----|-----|
| south korea | duck adenovirus a                      | Virus    | no  | no  | no  |
| south korea | brevundimonas vesicularis              | Bacteria | yes | no  | no  |
| south korea | cronobacter sakazakii                  | Bacteria | no  | no  | no  |
| south korea | fowl adenovirus c                      | Virus    | no  | no  | no  |
| south korea | getah virus                            | Virus    | yes | yes | no  |
| south korea | mycoplasma hyorhinitis                 | Bacteria | no  | no  | no  |
| south korea | mycobacterium parascrofulaceum         | Bacteria | no  | no  | no  |
| south korea | hepatitis b virus                      | Virus    | yes | no  | yes |
| south korea | porcine reproductive and respiratory s | Virus    | no  | no  | no  |
| south korea | clonorchis sinensis                    | Helminth | yes | no  | no  |
| south korea | human adenovirus f                     | Virus    | yes | no  | no  |
| south korea | enterococcus faecalis                  | Bacteria | yes | yes | yes |
| south korea | fusarium chlamydosporum                | Fungi    | yes | no  | no  |
| south korea | stenotrophomonas maltophilia           | Bacteria | no  | no  | no  |
| south korea | pseudomonas putida                     | Bacteria | yes | no  | no  |
| south korea | enterovibrio nigricans                 | Bacteria | no  | no  | no  |
| south korea | anaplasma phagocytophilum              | Bacteria | no  | no  | no  |
| south korea | aeromonas veronii                      | Bacteria | yes | no  | yes |
| south korea | trichinella spiralis                   | Helminth | yes | yes | yes |
| south korea | botryosphaeria rhodina                 | Fungi    | no  | no  | no  |
| south korea | infectious pancreatic necrosis virus   | Virus    | no  | no  | no  |
| south korea | mycobacterium leprae                   | Bacteria | yes | yes | yes |
| south korea | ruminococcus flavefaciens              | Bacteria | no  | no  | no  |
| south korea | exiguobacterium acetylicum             | Bacteria | no  | no  | no  |
| south korea | lactococcus garvieae                   | Bacteria | no  | no  | no  |
| south korea | torque teno sus virus 2                | Virus    | no  | no  | no  |
| south korea | tsukamurella tyrosinosolvens           | Bacteria | yes | no  | no  |
| south korea | lactobacillus plantarum                | Bacteria | no  | no  | no  |
| south korea | renibacterium salmoninarum             | Bacteria | no  | no  | no  |
| south korea | taenia asiatica                        | Helminth | no  | no  | no  |
| south korea | lactobacillus curvatus                 | Bacteria | no  | no  | no  |
| south korea | pasteurella multocida                  | Bacteria | yes | yes | no  |
| south korea | crimean-congo hemorrhagic fever viru   | Virus    | no  | no  | no  |
| south korea | staphylococcus epidermidis             | Bacteria | yes | yes | yes |
| south korea | helicobacter pylori                    | Bacteria | yes | yes | no  |
| south korea | lactobacillus delbrueckii              | Bacteria | no  | no  | no  |
| south korea | gibberella moniliformis                | Fungi    | no  | no  | no  |
| south korea | pseudomonas aeruginosa                 | Bacteria | yes | yes | yes |
| south korea | bovine viral diarrhea virus 2          | Virus    | no  | no  | no  |
| south korea | hantaan virus                          | Virus    | yes | yes | yes |
| south korea | fasciola gigantica                     | Helminth | yes | yes | no  |
| south korea | babesia gibsoni                        | Protozoa | yes | yes | no  |
| south korea | human coronavirus hku1                 | Virus    | no  | no  | no  |
| south korea | reticuloendotheliosis virus            | Virus    | no  | no  | no  |
| south korea | mycoplasma fermentans                  | Bacteria | yes | yes | no  |
| south korea | bacillus pumilus                       | Bacteria | yes | no  | no  |
| south korea | human immunodeficiency virus 1         | Virus    | yes | no  | yes |
| south korea | pseudomonas otitidis                   | Bacteria | no  | no  | no  |
| south korea | clostridium perfringens                | Bacteria | yes | yes | no  |
| south korea | jc polyomavirus                        | Virus    | no  | no  | no  |

|             |                                 |          |     |     |     |
|-------------|---------------------------------|----------|-----|-----|-----|
| south korea | bacillus thuringiensis          | Bacteria | yes | no  | no  |
| south korea | anisakis simplex                | Helminth | yes | yes | yes |
| south korea | human adenovirus b              | Virus    | yes | no  | no  |
| south korea | fasciola hepatica               | Helminth | yes | yes | no  |
| south korea | equid herpesvirus 2             | Virus    | no  | no  | no  |
| south korea | porcine epidemic diarrhea virus | Virus    | no  | no  | no  |
| south korea | bovine kobuvirus                | Virus    | no  | no  | no  |
| south korea | enterobius vermicularis         | Helminth | yes | yes | no  |
| south korea | seoul virus                     | Virus    | yes | yes | yes |
| south korea | influenza a virus               | Virus    | yes | yes | yes |
| south korea | moraxella bovoculi              | Bacteria | no  | no  | no  |
| south korea | anisakis pegreffii              | Helminth | no  | no  | no  |
| south korea | rickettsia typhi                | Bacteria | yes | yes | no  |
| south korea | plasmodium vivax                | Protozoa | yes | no  | yes |
| south korea | pepper mild mottle virus        | Virus    | no  | no  | no  |
| south korea | human rhinovirus b              | Virus    | yes | no  | no  |
| south korea | porcine type-c oncovirus        | Virus    | no  | no  | no  |
| south korea | torque teno canis virus         | Virus    | no  | no  | no  |
| south korea | sapporo virus                   | Virus    | no  | no  | no  |
| south korea | lactobacillus acidophilus       | Bacteria | no  | no  | no  |
| south korea | gordonia terrae                 | Bacteria | yes | no  | no  |
| south korea | ochrobactrum anthropi           | Bacteria | yes | no  | no  |
| south korea | alphacoronavirus 1              | Virus    | no  | no  | no  |
| south korea | cladosporium sphaerospermum     | Fungi    | no  | no  | no  |
| south korea | fusarium oxysporum              | Fungi    | yes | no  | yes |
| south korea | flavobacterium psychrophilum    | Bacteria | no  | no  | no  |
| south korea | hepatitis c virus               | Virus    | yes | no  | yes |
| south korea | trichoderma atroviride          | Fungi    | no  | no  | no  |
| south korea | acinetobacter baumannii         | Bacteria | yes | no  | no  |
| south korea | aureobasidium pullulans         | Fungi    | yes | no  | no  |
| south korea | enterococcus faecium            | Bacteria | yes | yes | yes |
| south korea | giardia intestinalis            | Protozoa | no  | no  | no  |
| south korea | streptomyces somaliensis        | Bacteria | no  | no  | no  |
| south korea | bartonella grahamii             | Bacteria | no  | no  | no  |
| south korea | aeromonas aquariorum            | Bacteria | no  | no  | no  |
| south korea | avian orthoreovirus             | Virus    | no  | no  | no  |
| south korea | lactobacillus paracasei         | Bacteria | no  | no  | no  |
| south korea | eimeria maxima                  | Protozoa | no  | no  | no  |
| south korea | bacillus licheniformis          | Bacteria | yes | yes | no  |
| south korea | leuconostoc mesenteroides       | Bacteria | no  | no  | no  |
| south korea | avian metapneumovirus           | Virus    | no  | no  | no  |
| south korea | mycobacterium bolletii          | Bacteria | no  | no  | no  |
| south korea | emerella nidulans               | Fungi    | no  | no  | no  |
| south korea | serratia marcescens             | Bacteria | yes | yes | yes |
| south korea | avian coronavirus               | Virus    | no  | no  | no  |
| south korea | cladosporium cladosporioides    | Fungi    | yes | no  | no  |
| south korea | miamiensis avidus               | Protozoa | no  | no  | no  |
| south korea | staphylococcus aureus           | Bacteria | yes | yes | yes |
| south korea | anisakis brevispiculata         | Helminth | no  | no  | no  |
| south korea | measles virus                   | Virus    | yes | yes | yes |

|             |                                    |          |     |     |     |
|-------------|------------------------------------|----------|-----|-----|-----|
| south korea | <i>hysterothylacium aduncum</i>    | Helminth | no  | no  | no  |
| south korea | betacoronavirus 1                  | Virus    | no  | no  | no  |
| south korea | lymphocystis disease virus 1       | Virus    | no  | no  | no  |
| south sudan | <i>onchocerca volvulus</i>         | Helminth | yes | yes | yes |
| south sudan | <i>theileria parva</i>             | Protozoa | no  | no  | no  |
| south sudan | <i>theileria annulata</i>          | Protozoa | no  | no  | no  |
| south sudan | sudan ebolavirus                   | Virus    | no  | no  | no  |
| south sudan | <i>trypanosoma brucei</i>          | Protozoa | yes | yes | yes |
| south sudan | <i>theileria mutans</i>            | Protozoa | no  | no  | no  |
| spain       | european bat lyssavirus 1          | Virus    | yes | yes | no  |
| spain       | <i>schikhobalotrema sparisomae</i> | Helminth | no  | no  | no  |
| spain       | <i>candida parapsilosis</i>        | Fungi    | yes | yes | no  |
| spain       | <i>agrobacterium tumefaciens</i>   | Bacteria | no  | no  | no  |
| spain       | pepper mild mottle virus           | Virus    | no  | no  | no  |
| spain       | <i>tenacibaculum gallaicum</i>     | Bacteria | no  | no  | no  |
| spain       | <i>pseudomonas synxantha</i>       | Bacteria | no  | no  | no  |
| spain       | <i>nosema ceranae</i>              | Fungi    | no  | no  | no  |
| spain       | <i>erwinia persicina</i>           | Bacteria | no  | no  | no  |
| spain       | <i>candida pseudoglaebosa</i>      | Fungi    | no  | no  | no  |
| spain       | <i>euparyphium albuferensis</i>    | Helminth | no  | no  | no  |
| spain       | <i>contraeaecum septentrionale</i> | Helminth | no  | no  | no  |
| spain       | visna/maedi virus                  | Virus    | no  | no  | no  |
| spain       | <i>arcobacter butzleri</i>         | Bacteria | yes | yes | no  |
| spain       | <i>escherichia coli</i>            | Bacteria | yes | yes | yes |
| spain       | <i>bacillus cereus</i>             | Bacteria | yes | yes | no  |
| spain       | <i>serratia proteamaculans</i>     | Bacteria | yes | no  | no  |
| spain       | <i>candida glabrata</i>            | Fungi    | yes | yes | yes |
| spain       | <i>theileria ovis</i>              | Protozoa | no  | no  | no  |
| spain       | <i>staphylococcus hominis</i>      | Bacteria | no  | no  | no  |
| spain       | <i>listonella anguillarum</i>      | Bacteria | no  | no  | no  |
| spain       | <i>lewia infectoria</i>            | Fungi    | no  | no  | no  |
| spain       | <i>saccocoelium brayi</i>          | Helminth | no  | no  | no  |
| spain       | <i>trypanosoma cruzi</i>           | Protozoa | yes | yes | yes |
| spain       | <i>helicobacter pylori</i>         | Bacteria | yes | yes | no  |
| spain       | yellow fever virus                 | Virus    | yes | yes | yes |
| spain       | border disease virus               | Virus    | no  | no  | no  |
| spain       | <i>vibrio campbellii</i>           | Bacteria | no  | no  | no  |
| spain       | <i>saccocoelium tensum</i>         | Helminth | no  | no  | no  |
| spain       | <i>aspergillus fumigatus</i>       | Fungi    | no  | no  | no  |
| spain       | <i>andrya cuniculi</i>             | Helminth | no  | no  | no  |
| spain       | <i>babesia gibsoni</i>             | Protozoa | yes | yes | no  |
| spain       | <i>mycoplasma mycoides</i>         | Bacteria | no  | no  | no  |
| spain       | torque teno sus virus 1            | Virus    | no  | no  | no  |
| spain       | hepatitis a virus                  | Virus    | yes | yes | yes |
| spain       | <i>corynebacterium propinquum</i>  | Bacteria | yes | no  | no  |
| spain       | <i>haemophilus influenzae</i>      | Bacteria | yes | no  | yes |
| spain       | <i>babesia canis</i>               | Protozoa | no  | no  | no  |
| spain       | <i>oerskovia turbata</i>           | Bacteria | no  | no  | no  |
| spain       | <i>epicoccum nigrum</i>            | Fungi    | no  | no  | no  |
| spain       | <i>theileria equi</i>              | Protozoa | no  | no  | no  |

|       |                                      |          |     |     |     |
|-------|--------------------------------------|----------|-----|-----|-----|
| spain | saccocoelium obesum                  | Helminth | no  | no  | no  |
| spain | lactococcus lactis                   | Bacteria | no  | no  | no  |
| spain | dietzia timorensis                   | Bacteria | no  | no  | no  |
| spain | gut metagenome                       | Others   | no  | no  | no  |
| spain | penicillium chrysogenum              | Fungi    | yes | no  | no  |
| spain | anaplasma ovis                       | Bacteria | no  | no  | no  |
| spain | infectious pancreatic necrosis virus | Virus    | no  | no  | no  |
| spain | rotavirus a                          | Virus    | yes | yes | yes |
| spain | lactobacillus mucosae                | Bacteria | no  | no  | no  |
| spain | haemophilus parainfluenzae           | Bacteria | yes | no  | no  |
| spain | enterococcus raffinosus              | Bacteria | yes | no  | no  |
| spain | fusarium solani                      | Fungi    | yes | yes | yes |
| spain | lactobacillus gasseri                | Bacteria | no  | no  | no  |
| spain | cetacean morbillivirus               | Virus    | no  | no  | no  |
| spain | toxoplasma gondii                    | Protozoa | yes | yes | yes |
| spain | mycoplasma agalactiae                | Bacteria | no  | no  | no  |
| spain | microbacterium resistens             | Bacteria | no  | no  | no  |
| spain | burkholderia cepacia                 | Bacteria | yes | no  | no  |
| spain | lactobacillus fermentum              | Bacteria | no  | no  | no  |
| spain | shewanella pneumatophori             | Bacteria | no  | no  | no  |
| spain | rhodococcus erythropolis             | Bacteria | yes | no  | no  |
| spain | aliivibrio fischeri                  | Bacteria | no  | no  | no  |
| spain | bacillus pumilus                     | Bacteria | yes | no  | no  |
| spain | lankesterella valsainensis           | Protozoa | no  | no  | no  |
| spain | campylobacter sputorum               | Bacteria | yes | no  | no  |
| spain | aliivibrio wodanis                   | Bacteria | no  | no  | no  |
| spain | aeromonas bivalvium                  | Bacteria | no  | no  | no  |
| spain | bacillus subtilis                    | Bacteria | yes | yes | no  |
| spain | taenia pisiformis                    | Helminth | no  | no  | no  |
| spain | rhodococcus equi                     | Bacteria | yes | yes | no  |
| spain | bacteroides ovatus                   | Bacteria | yes | no  | no  |
| spain | acinetobacter calcoaceticus          | Bacteria | yes | no  | no  |
| spain | dietzia natronolimnaea               | Bacteria | no  | no  | no  |
| spain | lactobacillus casei                  | Bacteria | no  | no  | no  |
| spain | paenibacillus barcinonensis          | Bacteria | no  | no  | no  |
| spain | human herpesvirus 5                  | Virus    | yes | no  | yes |
| spain | aeromonas hydrophila                 | Bacteria | yes | yes | yes |
| spain | staphylococcus equorum               | Bacteria | no  | no  | no  |
| spain | psychrobacter pulmonis               | Bacteria | no  | no  | no  |
| spain | enterobacter asburiae                | Bacteria | yes | yes | no  |
| spain | babesia caballi                      | Protozoa | no  | no  | no  |
| spain | bartonella henselae                  | Bacteria | yes | yes | no  |
| spain | campylobacter lanienae               | Bacteria | no  | no  | no  |
| spain | vibrio parahaemolyticus              | Bacteria | yes | yes | yes |
| spain | scedosporium dehoogii                | Fungi    | no  | no  | no  |
| spain | citrobacter freundii                 | Bacteria | yes | yes | no  |
| spain | aeromonas salmonicida                | Bacteria | no  | no  | no  |
| spain | streptococcus pneumoniae             | Bacteria | yes | yes | yes |
| spain | mucor circinelloides                 | Fungi    | yes | yes | no  |
| spain | arthrobacter oxydans                 | Bacteria | no  | no  | no  |



|       |                                        |          |     |     |     |
|-------|----------------------------------------|----------|-----|-----|-----|
| spain | babesia equi                           | Protozoa | no  | no  | no  |
| spain | vibrio scophthalmi                     | Bacteria | no  | no  | no  |
| spain | aspergillus novofumigatus              | Fungi    | no  | no  | no  |
| spain | hepatozoon canis                       | Protozoa | no  | no  | no  |
| spain | neospora caninum                       | Protozoa | no  | no  | no  |
| spain | mycobacterium intracellulare           | Bacteria | no  | no  | no  |
| spain | cordyceps bassiana                     | Fungi    | no  | no  | no  |
| spain | pseudallescheria minutispora           | Fungi    | no  | no  | no  |
| spain | primate t-lymphotropic virus 2         | Virus    | no  | no  | no  |
| spain | arthroderma benhamiae                  | Fungi    | no  | no  | no  |
| spain | pseudidiogenes nana                    | Helminth | no  | no  | no  |
| spain | paecilomyces lilacinus                 | Fungi    | yes | yes | no  |
| spain | chrysosporium guarroi                  | Fungi    | no  | no  | no  |
| spain | bacteroides fragilis                   | Bacteria | yes | yes | no  |
| spain | chaetomium globosum                    | Fungi    | yes | no  | no  |
| spain | saccharomyces cerevisiae               | Fungi    | yes | no  | no  |
| spain | porcine reproductive and respiratory s | Virus    | no  | no  | no  |
| spain | haploporus benedeni                    | Helminth | no  | no  | no  |
| spain | lyruterina nigropunctata               | Helminth | no  | no  | no  |
| spain | staphylococcus cohnii                  | Bacteria | no  | no  | no  |
| spain | ehrlichia canis                        | Bacteria | no  | no  | no  |
| spain | microbacterium oxydans                 | Bacteria | no  | no  | no  |
| spain | parabacteroides distasonis             | Bacteria | no  | no  | no  |
| spain | asordaria tenerifae                    | Fungi    | no  | no  | no  |
| spain | aeromonas veronii                      | Bacteria | yes | no  | yes |
| spain | micrococcus luteus                     | Bacteria | no  | no  | no  |
| spain | bacteroides uniformis                  | Bacteria | yes | no  | no  |
| spain | viral hemorrhagic septicemia virus     | Virus    | no  | no  | no  |
| spain | streptococcus gordonii                 | Bacteria | yes | no  | no  |
| spain | candida albicans                       | Fungi    | yes | yes | yes |
| spain | entamoeba struthionis                  | Protozoa | no  | no  | no  |
| spain | lactobacillus murinus                  | Bacteria | no  | no  | no  |
| spain | human immunodeficiency virus 2         | Virus    | yes | no  | yes |
| spain | enterococcus faecalis                  | Bacteria | yes | yes | yes |
| spain | streptococcus pyogenes                 | Bacteria | yes | yes | yes |
| spain | enterovibrio nigricans                 | Bacteria | no  | no  | no  |
| spain | salmonella enterica                    | Bacteria | no  | no  | no  |
| spain | forticulcita gibsoni                   | Helminth | no  | no  | no  |
| spain | kluveromyces marxianus                 | Fungi    | no  | no  | no  |
| spain | phanerochaete sordida                  | Fungi    | no  | no  | no  |
| spain | weissella cibaria                      | Bacteria | no  | no  | no  |
| spain | cryptococcus gattii                    | Fungi    | no  | no  | no  |
| spain | norwalk virus                          | Virus    | yes | no  | yes |
| spain | vibrio ponticus                        | Bacteria | no  | no  | no  |
| spain | rothia mucilaginosa                    | Bacteria | no  | no  | no  |
| spain | spironucleus torosa                    | Protozoa | no  | no  | no  |
| spain | aspergillus lentulus                   | Fungi    | no  | no  | no  |
| spain | leuconostoc citreum                    | Bacteria | no  | no  | no  |
| spain | candida tropicalis                     | Fungi    | yes | yes | no  |
| spain | enterococcus hirae                     | Bacteria | yes | yes | no  |

|       |                                  |          |     |     |     |
|-------|----------------------------------|----------|-----|-----|-----|
| spain | campylobacter hyointestinalis    | Bacteria | yes | yes | no  |
| spain | trichinella britovi              | Helminth | yes | yes | no  |
| spain | cryptosporidium parvum           | Protozoa | yes | yes | yes |
| spain | acinetobacter lwoffii            | Bacteria | yes | no  | no  |
| spain | streptococcus mitis              | Bacteria | yes | no  | no  |
| spain | simian immunodeficiency virus    | Virus    | no  | no  | no  |
| spain | nocardia asteroides              | Bacteria | yes | yes | no  |
| spain | lactobacillus rhamnosus          | Bacteria | no  | no  | no  |
| spain | trichuris suis                   | Helminth | yes | yes | no  |
| spain | hepatozoon felis                 | Protozoa | no  | no  | no  |
| spain | taenia parva                     | Helminth | no  | no  | no  |
| spain | foot-and-mouth disease virus     | Virus    | no  | no  | no  |
| spain | mycoleptodiscus indicus          | Fungi    | yes | no  | no  |
| spain | tenacibaculum discolor           | Bacteria | no  | no  | no  |
| spain | rabbit hemorrhagic disease virus | Virus    | no  | no  | no  |
| spain | streptococcus oralis             | Bacteria | no  | no  | no  |
| spain | heligmosomoides polygyrus        | Helminth | no  | no  | no  |
| spain | gibberella intermedia            | Fungi    | no  | no  | no  |
| spain | human herpesvirus 1              | Virus    | no  | no  | no  |
| spain | campylobacter jejuni             | Bacteria | yes | yes | yes |
| spain | leishmania infantum              | Protozoa | yes | yes | yes |
| spain | sporothrix schenckii             | Fungi    | yes | yes | no  |
| spain | petasiger phalacrocoracis        | Helminth | no  | no  | no  |
| spain | phaeoacremonium rubrigenum       | Fungi    | no  | no  | no  |
| spain | gemella haemolysans              | Bacteria | no  | no  | no  |
| spain | pseudallescheria ellipsoidea     | Fungi    | no  | no  | no  |
| spain | rickettsia massiliae             | Bacteria | yes | yes | no  |
| spain | lactobacillus crispatus          | Bacteria | no  | no  | no  |
| spain | bacillus megaterium              | Bacteria | no  | no  | no  |
| spain | agrobacterium rhizogenes         | Bacteria | no  | no  | no  |
| spain | choanotaenia infundibulum        | Helminth | no  | no  | no  |
| spain | listeria monocytogenes           | Bacteria | yes | yes | yes |
| spain | infectious bursal disease virus  | Virus    | no  | no  | no  |
| spain | lactococcus garvieae             | Bacteria | no  | no  | no  |
| spain | trichuris muris                  | Helminth | no  | no  | no  |
| spain | prosthodendrium parvouterus      | Helminth | no  | no  | no  |
| spain | candida nivariensis              | Fungi    | no  | no  | no  |
| spain | stenotrophomonas maltophilia     | Bacteria | no  | no  | no  |
| spain | human enterovirus a              | Virus    | yes | no  | no  |
| spain | pseudomonas fragi                | Bacteria | no  | no  | no  |
| spain | vibrio cholerae                  | Bacteria | yes | no  | yes |
| spain | aurantimonas altamirensis        | Bacteria | no  | no  | no  |
| spain | lactobacillus reuteri            | Bacteria | no  | no  | no  |
| spain | echinococcus multilocularis      | Helminth | yes | yes | no  |
| spain | chryseobacterium shigense        | Bacteria | no  | no  | no  |
| spain | rickettsia conorii               | Bacteria | yes | yes | no  |
| spain | sarcocystis hominis              | Protozoa | yes | yes | no  |
| spain | rabies virus                     | Virus    | yes | yes | yes |
| spain | nematodiroides zembrae           | Helminth | no  | no  | no  |
| spain | enterococcus durans              | Bacteria | yes | yes | no  |

|       |                                 |          |     |     |     |
|-------|---------------------------------|----------|-----|-----|-----|
| spain | leuconostoc fallax              | Bacteria | no  | no  | no  |
| spain | ragaia lizae                    | Helminth | no  | no  | no  |
| spain | campylobacter coli              | Bacteria | yes | yes | no  |
| spain | aspergillus ustus               | Fungi    | no  | no  | no  |
| spain | streptococcus parasanguinis     | Bacteria | no  | no  | no  |
| spain | sarcocystis sui hominis         | Protozoa | yes | yes | no  |
| spain | saccocoelium cephalii           | Helminth | no  | no  | no  |
| spain | bacillus thuringiensis          | Bacteria | yes | no  | no  |
| spain | xanthomonas campestris          | Bacteria | no  | no  | no  |
| spain | aspergillus tamarii             | Fungi    | no  | no  | no  |
| spain | streptococcus equinus           | Bacteria | no  | no  | no  |
| spain | bacillus amyloliquefaciens      | Bacteria | no  | no  | no  |
| spain | cryptosporidium struthionis     | Protozoa | no  | no  | no  |
| spain | neisseria gonorrhoeae           | Bacteria | yes | no  | yes |
| spain | haemophilus parasuis            | Bacteria | no  | no  | no  |
| spain | weissella confusa               | Bacteria | no  | no  | no  |
| spain | aspergillus calidoustus         | Fungi    | no  | no  | no  |
| spain | aspergillus viridinutans        | Fungi    | no  | no  | no  |
| spain | taenia saginata                 | Helminth | yes | yes | no  |
| spain | porcine teschovirus             | Virus    | no  | no  | no  |
| spain | human parechovirus              | Virus    | no  | no  | no  |
| spain | mycoplasma haemofelis           | Bacteria | no  | no  | no  |
| spain | bacteroides caccae              | Bacteria | yes | no  | no  |
| spain | anisakis simplex                | Helminth | yes | yes | yes |
| spain | feline leukemia virus           | Virus    | no  | no  | no  |
| spain | klebsiella pneumoniae           | Bacteria | yes | yes | yes |
| spain | theileria annulata              | Protozoa | no  | no  | no  |
| spain | pneumocystis carinii            | Fungi    | yes | yes | yes |
| spain | anguillicoloides crassus        | Helminth | no  | no  | no  |
| spain | theileria sergenti              | Protozoa | no  | no  | no  |
| spain | staphylococcus pseudintermedius | Bacteria | no  | no  | no  |
| spain | aspergillus tubingensis         | Fungi    | no  | no  | no  |
| spain | bk polyomavirus                 | Virus    | no  | no  | no  |
| spain | rickettsia slovaca              | Bacteria | yes | yes | no  |
| spain | lactobacillus paracasei         | Bacteria | no  | no  | no  |
| spain | bluetongue virus                | Virus    | no  | no  | no  |
| spain | aleutian mink disease virus     | Virus    | no  | no  | no  |
| spain | lecithobotrys putrescens        | Helminth | no  | no  | no  |
| spain | malassezia sympodialis          | Fungi    | yes | yes | no  |
| spain | vibrio ichthyenteri             | Bacteria | no  | no  | no  |
| spain | lactobacillus jensenii          | Bacteria | no  | no  | no  |
| spain | lactobacillus plantarum         | Bacteria | no  | no  | no  |
| spain | aeromonas eucrenophila          | Bacteria | no  | no  | no  |
| spain | angiostrongylus cantonensis     | Helminth | yes | no  | no  |
| spain | staphylococcus haemolyticus     | Bacteria | yes | yes | no  |
| spain | african swine fever virus       | Virus    | no  | no  | no  |
| spain | rhizobium cellulosilyticum      | Bacteria | no  | no  | no  |
| spain | anaplasma phagocytophilum       | Bacteria | no  | no  | no  |
| spain | lactobacillus iners             | Bacteria | no  | no  | no  |
| spain | porcine sapelovirus             | Virus    | no  | no  | no  |

|       |                                |          |     |     |     |
|-------|--------------------------------|----------|-----|-----|-----|
| spain | aspergillus versicolor         | Fungi    | yes | no  | no  |
| spain | vibrio aestuarianus            | Bacteria | no  | no  | no  |
| spain | kluyvera cryocrescens          | Bacteria | yes | yes | no  |
| spain | enterobacter aerogenes         | Bacteria | yes | yes | no  |
| spain | kocuria marina                 | Bacteria | no  | no  | no  |
| spain | rubella virus                  | Virus    | yes | no  | no  |
| spain | klebsiella oxytoca             | Bacteria | yes | yes | no  |
| spain | dietzia maris                  | Bacteria | no  | no  | no  |
| spain | lactobacillus salivarius       | Bacteria | no  | no  | no  |
| spain | phyllobothrium delphini        | Helminth | no  | no  | no  |
| spain | hepatitis e virus              | Virus    | yes | yes | yes |
| spain | scedosporium apiospermum       | Fungi    | no  | no  | no  |
| spain | pseudallescheria boydii        | Fungi    | no  | no  | no  |
| spain | dengue virus                   | Virus    | no  | no  | no  |
| spain | raillietina micracantha        | Helminth | no  | no  | no  |
| spain | tropheryma whipplei            | Bacteria | no  | no  | no  |
| spain | enterococcus faecium           | Bacteria | yes | yes | yes |
| spain | pantoea eucrina                | Bacteria | no  | no  | no  |
| spain | aeromonas sobria               | Bacteria | yes | yes | no  |
| spain | dicrogaster contracta          | Helminth | no  | no  | no  |
| spain | gyrodactylus anguillae         | Helminth | no  | no  | no  |
| spain | aeromonas tecta                | Bacteria | no  | no  | no  |
| spain | babesia motasi                 | Protozoa | no  | no  | no  |
| spain | coxiella burnetii              | Bacteria | yes | yes | no  |
| spain | sandfly fever naples virus     | Virus    | yes | yes | yes |
| spain | legionella pneumophila         | Bacteria | yes | no  | yes |
| spain | francisella tularensis         | Bacteria | yes | yes | yes |
| spain | pneumocystis jirovecii         | Fungi    | no  | no  | no  |
| spain | human immunodeficiency virus 1 | Virus    | yes | no  | yes |
| spain | babesia ovis                   | Protozoa | no  | no  | no  |
| spain | vibrio splendidus              | Bacteria | no  | no  | no  |
| spain | borrelia burgdorferi           | Bacteria | yes | yes | yes |
| spain | yersinia pseudotuberculosis    | Bacteria | yes | yes | no  |
| spain | rhizopus oryzae                | Fungi    | yes | yes | no  |
| spain | pseudomonas fluorescens        | Bacteria | yes | no  | no  |
| spain | neisseria meningitidis         | Bacteria | yes | no  | yes |
| spain | porcine torovirus              | Virus    | no  | no  | no  |
| spain | acremonium strictum            | Fungi    | yes | no  | no  |
| spain | human herpesvirus 3            | Virus    | no  | no  | no  |
| spain | influenza a virus              | Virus    | yes | yes | yes |
| spain | delftia acidovorans            | Bacteria | yes | no  | no  |
| spain | chlamydia trachomatis          | Bacteria | yes | yes | yes |
| spain | vibrio lentus                  | Bacteria | no  | no  | no  |
| spain | trichuris arvicolae            | Helminth | no  | no  | no  |
| spain | penicillium polonicum          | Fungi    | no  | no  | no  |
| spain | human adenovirus b             | Virus    | yes | no  | no  |
| spain | microbacterium phyllosphaerae  | Bacteria | no  | no  | no  |
| spain | cryptosporidium xiaoi          | Protozoa | no  | no  | no  |
| spain | borrelia lusitaniae            | Bacteria | no  | no  | no  |
| spain | lymphocystis disease virus 1   | Virus    | no  | no  | no  |

|       |                                |          |     |     |     |
|-------|--------------------------------|----------|-----|-----|-----|
| spain | botryosphaeria dothidea        | Fungi    | no  | no  | no  |
| spain | methylobacterium radiotolerans | Bacteria | no  | no  | no  |
| spain | monorygma grimaldii            | Helminth | no  | no  | no  |
| spain | aspergillus terreus            | Fungi    | no  | no  | no  |
| spain | streptococcus anginosus        | Bacteria | yes | no  | no  |
| spain | mycobacterium chlorophenicum   | Bacteria | no  | no  | no  |
| spain | engyodontium album             | Fungi    | yes | no  | no  |
| spain | myxoma virus                   | Virus    | no  | no  | no  |
| spain | rotavirus c                    | Virus    | yes | yes | yes |
| spain | mycobacterium tuberculosis     | Bacteria | yes | yes | yes |
| spain | aeromonas encheleia            | Bacteria | no  | no  | no  |
| spain | pantoea agglomerans            | Bacteria | yes | yes | no  |
| spain | fasciola hepatica              | Helminth | yes | yes | no  |
| spain | fusarium chlamyosporum         | Fungi    | yes | no  | no  |
| spain | propionibacterium acnes        | Bacteria | yes | yes | no  |
| spain | aeromonas bestiarum            | Bacteria | no  | no  | no  |
| spain | fusarium polyphialidicum       | Fungi    | no  | no  | no  |
| spain | plasmodium falciparum          | Protozoa | yes | no  | yes |
| spain | brachycladium atlanticum       | Helminth | no  | no  | no  |
| spain | yersinia enterocolitica        | Bacteria | yes | yes | yes |
| spain | babesia bovis                  | Protozoa | yes | yes | no  |
| spain | dicrogaster perpusilla         | Helminth | no  | no  | no  |
| spain | plectosphaerella cucumerina    | Fungi    | no  | no  | no  |
| spain | bacteroides coprosuis          | Bacteria | no  | no  | no  |
| spain | babesia microti                | Protozoa | yes | yes | yes |
| spain | human enterovirus b            | Virus    | yes | no  | yes |
| spain | bacteroides dorei              | Bacteria | no  | no  | no  |
| spain | torque teno sus virus 2        | Virus    | no  | no  | no  |
| spain | west nile virus                | Virus    | yes | yes | yes |
| spain | pichia kudriavzevii            | Fungi    | no  | no  | no  |
| spain | jaagsiekte sheep retrovirus    | Virus    | no  | no  | no  |
| spain | phialosimplex chlamyosporus    | Fungi    | no  | no  | no  |
| spain | bacteroides finegoldii         | Bacteria | no  | no  | no  |
| spain | hortaea werneckii              | Fungi    | yes | no  | no  |
| spain | staphylococcus epidermidis     | Bacteria | yes | yes | yes |
| spain | neoctenotaenia ctenoides       | Helminth | no  | no  | no  |
| spain | acinetobacter johnsonii        | Bacteria | yes | no  | no  |
| spain | balantidium coli               | Protozoa | yes | yes | no  |
| spain | pseudomonas stutzeri           | Bacteria | yes | no  | no  |
| spain | scedosporium aurantiacum       | Fungi    | no  | no  | no  |
| spain | primate t-lymphotropic virus 1 | Virus    | no  | no  | no  |
| spain | streptococcus agalactiae       | Bacteria | yes | yes | no  |
| spain | lactobacillus curvatus         | Bacteria | no  | no  | no  |
| spain | neosartorya hiratsukae         | Fungi    | no  | no  | no  |
| spain | mumps virus                    | Virus    | yes | no  | no  |
| spain | anaplasma marginale            | Bacteria | no  | no  | no  |
| spain | aureobasidium pullulans        | Fungi    | yes | no  | no  |
| spain | hepatitis c virus              | Virus    | yes | no  | yes |
| spain | trichinella spiralis           | Helminth | yes | yes | yes |
| spain | fusarium oxysporum             | Fungi    | yes | no  | yes |

|           |                                      |          |     |     |     |
|-----------|--------------------------------------|----------|-----|-----|-----|
| spain     | candida membranifaciens              | Fungi    | no  | no  | no  |
| spain     | rhizopus microsporus                 | Fungi    | yes | yes | no  |
| spain     | sinorhizobium medicae                | Bacteria | no  | no  | no  |
| spain     | pseudomonas putida                   | Bacteria | yes | no  | no  |
| spain     | human metapneumovirus                | Virus    | no  | no  | no  |
| spain     | theileria buffeli                    | Protozoa | no  | no  | no  |
| spain     | yersinia ruckeri                     | Bacteria | yes | yes | no  |
| spain     | aeromonas piscicola                  | Bacteria | no  | no  | no  |
| spain     | staphylococcus aureus                | Bacteria | yes | yes | yes |
| spain     | lysini bacillus sphaericus           | Bacteria | no  | no  | no  |
| spain     | sapporo virus                        | Virus    | no  | no  | no  |
| spain     | microbacterium oleivorans            | Bacteria | no  | no  | no  |
| spain     | giardia intestinalis                 | Protozoa | no  | no  | no  |
| spain     | brevundimonas diminuta               | Bacteria | yes | no  | no  |
| spain     | bacillus circulans                   | Bacteria | yes | no  | no  |
| spain     | pseudomonas chlororaphis             | Bacteria | no  | no  | no  |
| spain     | jc polyomavirus                      | Virus    | no  | no  | no  |
| spain     | influenza b virus                    | Virus    | yes | yes | no  |
| spain     | measles virus                        | Virus    | yes | yes | yes |
| spain     | aspergillus niger                    | Fungi    | yes | yes | no  |
| spain     | caprine arthritis encephalitis virus | Virus    | no  | no  | no  |
| spain     | gibberella moniliformis              | Fungi    | no  | no  | no  |
| spain     | dicrocoelium dendriticum             | Helminth | yes | yes | no  |
| spain     | alternaria alternata                 | Fungi    | yes | yes | no  |
| spain     | aspergillus carbonarius              | Fungi    | no  | no  | no  |
| spain     | photobacterium damsela               | Bacteria | yes | yes | no  |
| spain     | streptococcus salivarius             | Bacteria | yes | no  | no  |
| spain     | haplospalchnus pachysomus            | Helminth | no  | no  | no  |
| spain     | molluscum contagiosum virus          | Virus    | yes | no  | no  |
| spain     | borrelia hispanica                   | Bacteria | yes | yes | no  |
| spain     | pseudomonas anguilliseptica          | Bacteria | no  | no  | no  |
| spain     | rhodotorula mucilaginosa             | Fungi    | yes | yes | no  |
| spain     | pseudomonas aeruginosa               | Bacteria | yes | yes | yes |
| spain     | wickerhamomyces anomalus             | Fungi    | no  | no  | no  |
| spain     | bacteroides thetaiotaomicron         | Bacteria | yes | no  | no  |
| spain     | trichuris ovis                       | Helminth | no  | no  | no  |
| spain     | anaplasma platys                     | Bacteria | no  | no  | no  |
| spain     | corynebacterium xerosis              | Bacteria | yes | no  | no  |
| spain     | beak and feather disease virus       | Virus    | no  | no  | no  |
| spain     | avian coronavirus                    | Virus    | no  | no  | no  |
| spain     | hepatitis b virus                    | Virus    | yes | no  | yes |
| spain     | bacillus flexus                      | Bacteria | no  | no  | no  |
| spain     | debaryomyces hansenii                | Fungi    | no  | no  | no  |
| sri lanka | chikungunya virus                    | Virus    | yes | yes | yes |
| sri lanka | mycobacterium tuberculosis           | Bacteria | yes | yes | yes |
| sri lanka | botryosphaeria dothidea              | Fungi    | no  | no  | no  |
| sri lanka | human parechovirus                   | Virus    | no  | no  | no  |
| sri lanka | setaria digitata                     | Helminth | no  | no  | no  |
| sri lanka | jc polyomavirus                      | Virus    | no  | no  | no  |
| sri lanka | plasmodium vivax                     | Protozoa | yes | no  | yes |

|           |                                  |          |     |     |     |
|-----------|----------------------------------|----------|-----|-----|-----|
| sri lanka | trichoderma atroviride           | Fungi    | no  | no  | no  |
| sri lanka | foot-and-mouth disease virus     | Virus    | no  | no  | no  |
| sri lanka | schistosoma spindale             | Helminth | yes | yes | no  |
| sri lanka | wuchereria bancrofti             | Helminth | yes | no  | yes |
| sri lanka | dengue virus                     | Virus    | no  | no  | no  |
| sri lanka | human immunodeficiency virus 2   | Virus    | yes | no  | yes |
| sri lanka | theileria orientalis             | Protozoa | no  | no  | no  |
| sri lanka | rabies virus                     | Virus    | yes | yes | yes |
| sri lanka | schistosoma nasale               | Helminth | no  | no  | no  |
| sri lanka | fusarium solani                  | Fungi    | yes | yes | yes |
| sri lanka | leishmania donovani              | Protozoa | yes | yes | yes |
| sri lanka | plasmodium falciparum            | Protozoa | yes | no  | yes |
| sudan     | echinococcus granulosus          | Helminth | yes | yes | yes |
| sudan     | aspergillus fumigatus            | Fungi    | no  | no  | no  |
| sudan     | leishmania infantum              | Protozoa | yes | yes | yes |
| sudan     | peste-des-petits-ruminants virus | Virus    | no  | no  | no  |
| sudan     | theileria annulata               | Protozoa | no  | no  | no  |
| sudan     | measles virus                    | Virus    | yes | yes | yes |
| sudan     | ehrlichia ruminantium            | Bacteria | no  | no  | no  |
| sudan     | jc polyomavirus                  | Virus    | no  | no  | no  |
| sudan     | trypanosoma rangeli              | Protozoa | no  | no  | no  |
| sudan     | enterobius vermicularis          | Helminth | yes | yes | no  |
| sudan     | mycobacterium tuberculosis       | Bacteria | yes | yes | yes |
| sudan     | bacillus thuringiensis           | Bacteria | yes | no  | no  |
| sudan     | human immunodeficiency virus 1   | Virus    | yes | no  | yes |
| sudan     | plasmodium vivax                 | Protozoa | yes | no  | yes |
| sudan     | staphylococcus aureus            | Bacteria | yes | yes | yes |
| sudan     | rabies virus                     | Virus    | yes | yes | yes |
| sudan     | yellow fever virus               | Virus    | yes | yes | yes |
| sudan     | leishmania major                 | Protozoa | yes | yes | no  |
| sudan     | onchocerca volvulus              | Helminth | yes | yes | yes |
| sudan     | aspergillus niger                | Fungi    | yes | yes | no  |
| sudan     | schistosoma haematobium          | Helminth | yes | yes | no  |
| sudan     | theileria ovis                   | Protozoa | no  | no  | no  |
| sudan     | bluetongue virus                 | Virus    | no  | no  | no  |
| sudan     | theileria lestoquardi            | Protozoa | no  | no  | no  |
| sudan     | polyonchobothrium polypteri      | Helminth | no  | no  | no  |
| sudan     | foot-and-mouth disease virus     | Virus    | no  | no  | no  |
| sudan     | newcastle disease virus          | Virus    | yes | yes | no  |
| sudan     | leishmania tropica               | Protozoa | yes | yes | no  |
| sudan     | human enterovirus c              | Virus    | yes | no  | no  |
| sudan     | trypanosoma simiae               | Protozoa | no  | no  | no  |
| sudan     | schistosoma mansoni              | Helminth | yes | yes | yes |
| sudan     | leishmania donovani              | Protozoa | yes | yes | yes |
| sudan     | escherichia coli                 | Bacteria | yes | yes | yes |
| sudan     | avian orthoreovirus              | Virus    | no  | no  | no  |
| sudan     | influenza a virus                | Virus    | yes | yes | yes |
| sudan     | plasmodium falciparum            | Protozoa | yes | no  | yes |
| sudan     | hepatozoon canis                 | Protozoa | no  | no  | no  |
| sudan     | babesia canis                    | Protozoa | no  | no  | no  |

|           |                                    |          |     |     |     |
|-----------|------------------------------------|----------|-----|-----|-----|
| sudan     | colletotrichum truncatum           | Fungi    | no  | no  | no  |
| sudan     | hepatitis b virus                  | Virus    | yes | no  | yes |
| suriname  | primate t-lymphotropic virus 1     | Virus    | no  | no  | no  |
| suriname  | dengue virus                       | Virus    | no  | no  | no  |
| suriname  | plasmodium falciparum              | Protozoa | yes | no  | yes |
| suriname  | human immunodeficiency virus 1     | Virus    | yes | no  | yes |
| swaziland | protopolystoma orientalis          | Helminth | no  | no  | no  |
| swaziland | measles virus                      | Virus    | yes | yes | yes |
| swaziland | foot-and-mouth disease virus       | Virus    | no  | no  | no  |
| sweden    | clostridium butyricum              | Bacteria | yes | no  | no  |
| sweden    | gyrodactylus pungitii              | Helminth | no  | no  | no  |
| sweden    | phanerochaete sordida              | Fungi    | no  | no  | no  |
| sweden    | collinsella aerofaciens            | Bacteria | yes | yes | no  |
| sweden    | suid herpesvirus 1                 | Virus    | no  | no  | no  |
| sweden    | pseudomonas lundensis              | Bacteria | no  | no  | no  |
| sweden    | human coronavirus nl63             | Virus    | no  | no  | no  |
| sweden    | klebsiella pneumoniae              | Bacteria | yes | yes | yes |
| sweden    | torque teno virus 2                | Virus    | no  | no  | no  |
| sweden    | lactobacillus gasseri              | Bacteria | no  | no  | no  |
| sweden    | viral hemorrhagic septicemia virus | Virus    | no  | no  | no  |
| sweden    | gyrodactylus harengi               | Helminth | no  | no  | no  |
| sweden    | cordyceps bassiana                 | Fungi    | no  | no  | no  |
| sweden    | staphylococcus auricularis         | Bacteria | no  | no  | no  |
| sweden    | bifidobacterium longum             | Bacteria | no  | no  | no  |
| sweden    | gyrodactylus rugiensis             | Helminth | no  | no  | no  |
| sweden    | brachyspira aalborgi               | Bacteria | no  | no  | no  |
| sweden    | mycobacterium tuberculosis         | Bacteria | yes | yes | yes |
| sweden    | renibacterium salmoninarum         | Bacteria | no  | no  | no  |
| sweden    | dictyocaulus viviparus             | Helminth | no  | no  | no  |
| sweden    | gyrodactylus salaris               | Helminth | no  | no  | no  |
| sweden    | parabacteroides distasonis         | Bacteria | no  | no  | no  |
| sweden    | dichelobacter nodosus              | Bacteria | yes | yes | no  |
| sweden    | bifidobacterium dentium            | Bacteria | yes | no  | no  |
| sweden    | actinomyces naeslundii             | Bacteria | yes | yes | no  |
| sweden    | streptococcus pneumoniae           | Bacteria | yes | yes | yes |
| sweden    | enterobacter cloacae               | Bacteria | yes | yes | no  |
| sweden    | prevotella buccae                  | Bacteria | yes | no  | no  |
| sweden    | human papillomavirus 16            | Virus    | no  | no  | no  |
| sweden    | malassezia sympodialis             | Fungi    | yes | yes | no  |
| sweden    | bifidobacterium adolescentis       | Bacteria | no  | no  | no  |
| sweden    | borrelia afzelii                   | Bacteria | no  | no  | no  |
| sweden    | taylorella asinigenitalis          | Bacteria | no  | no  | no  |
| sweden    | nicoletella semolina               | Bacteria | no  | no  | no  |
| sweden    | aeromonas hydrophila               | Bacteria | yes | yes | yes |
| sweden    | influenza a virus                  | Virus    | yes | yes | yes |
| sweden    | brachyspira suanatina              | Bacteria | no  | no  | no  |
| sweden    | rhodococcus erythropolis           | Bacteria | yes | no  | no  |
| sweden    | ophiostoma stenoceras              | Fungi    | no  | no  | no  |
| sweden    | malassezia pachydermatis           | Fungi    | yes | yes | yes |
| sweden    | sutterella wadsworthensis          | Bacteria | yes | no  | no  |



|        |                            |          |     |     |     |
|--------|----------------------------|----------|-----|-----|-----|
| sweden | hepatitis c virus          | Virus    | yes | no  | yes |
| sweden | chlamydia trachomatis      | Bacteria | yes | yes | yes |
| sweden | neisseria meningitidis     | Bacteria | yes | no  | yes |
| sweden | clostridium innocuum       | Bacteria | no  | no  | no  |
| sweden | anaplasma phagocytophilum  | Bacteria | no  | no  | no  |
| sweden | sapporo virus              | Virus    | no  | no  | no  |
| sweden | giardia intestinalis       | Protozoa | no  | no  | no  |
| sweden | streptococcus dysgalactiae | Bacteria | no  | no  | no  |
| sweden | streptococcus mutans       | Bacteria | yes | no  | no  |
| sweden | human enterovirus a        | Virus    | yes | no  | no  |
| sweden | paecilomyces lilacinus     | Fungi    | yes | yes | no  |
| sweden | francisella tularensis     | Bacteria | yes | yes | yes |
| sweden | torque teno virus 1        | Virus    | no  | no  | no  |
| sweden | alternaria alternata       | Fungi    | yes | yes | no  |
| sweden | bifidobacterium breve      | Bacteria | no  | no  | no  |
| sweden | mycoplasma genitalium      | Bacteria | yes | no  | no  |
| sweden | brachyspira hyodysenteriae | Bacteria | no  | no  | no  |
| sweden | lactobacillus acidophilus  | Bacteria | no  | no  | no  |
| sweden | chlamydophila pneumoniae   | Bacteria | yes | yes | no  |
| sweden | clostridium perfringens    | Bacteria | yes | yes | no  |
| sweden | betacoronavirus 1          | Virus    | no  | no  | no  |
| sweden | norwalk virus              | Virus    | yes | no  | yes |
| sweden | helicobacter pylori        | Bacteria | yes | yes | no  |
| sweden | haemoproteus majoris       | Protozoa | no  | no  | no  |
| sweden | taylorella equigenitalis   | Bacteria | no  | no  | no  |
| sweden | campylobacter jejuni       | Bacteria | yes | yes | yes |
| sweden | bartonella grahamii        | Bacteria | no  | no  | no  |
| sweden | fowl adenovirus d          | Virus    | no  | no  | no  |
| sweden | lecythophora hoffmannii    | Fungi    | yes | no  | no  |
| sweden | avian coronavirus          | Virus    | no  | no  | no  |
| sweden | staphylococcus hyicus      | Bacteria | yes | yes | no  |
| sweden | streptococcus pyogenes     | Bacteria | yes | yes | yes |
| sweden | cowpox virus               | Virus    | yes | yes | no  |
| sweden | human papillomavirus 61    | Virus    | no  | no  | no  |
| sweden | hepatitis b virus          | Virus    | yes | no  | yes |
| sweden | saccharomyces cerevisiae   | Fungi    | yes | no  | no  |
| sweden | bacteroides dorei          | Bacteria | no  | no  | no  |
| sweden | anaerostipes caccae        | Bacteria | no  | no  | no  |
| sweden | acinetobacter baumannii    | Bacteria | yes | no  | no  |
| sweden | haemophilus influenzae     | Bacteria | yes | no  | yes |
| sweden | streptococcus phocae       | Bacteria | no  | no  | no  |
| sweden | clostridium hiranonis      | Bacteria | no  | no  | no  |
| sweden | borrelia miyamotoi         | Bacteria | no  | no  | no  |
| sweden | preussia minima            | Fungi    | no  | no  | no  |
| sweden | jc polyomavirus            | Virus    | no  | no  | no  |
| sweden | bacteroides fragilis       | Bacteria | yes | yes | no  |
| sweden | enterococcus gallinarum    | Bacteria | yes | no  | no  |
| sweden | newcastle disease virus    | Virus    | yes | yes | no  |
| sweden | gyrodactylus arcuatus      | Helminth | no  | no  | no  |
| sweden | mesorhizobium loti         | Bacteria | no  | no  | no  |

|        |                                |          |     |     |     |
|--------|--------------------------------|----------|-----|-----|-----|
| sweden | simian immunodeficiency virus  | Virus    | no  | no  | no  |
| sweden | bacillus subtilis              | Bacteria | yes | yes | no  |
| sweden | actinomyces oris               | Bacteria | no  | no  | no  |
| sweden | legionella pneumophila         | Bacteria | yes | no  | yes |
| sweden | epicoccum nigrum               | Fungi    | no  | no  | no  |
| sweden | human coronavirus hku1         | Virus    | no  | no  | no  |
| sweden | clostridium difficile          | Bacteria | yes | yes | yes |
| sweden | acinetobacter calcoaceticus    | Bacteria | yes | no  | no  |
| sweden | enterococcus faecalis          | Bacteria | yes | yes | yes |
| sweden | cryptosporidium parvum         | Protozoa | yes | yes | yes |
| sweden | human immunodeficiency virus 1 | Virus    | yes | no  | yes |
| sweden | flavonifractor plautii         | Bacteria | no  | no  | no  |
| sweden | pseudomonas brenneri           | Bacteria | no  | no  | no  |
| sweden | malassezia furfur              | Fungi    | yes | yes | no  |
| sweden | bk polyomavirus                | Virus    | no  | no  | no  |
| sweden | lactobacillus rhamnosus        | Bacteria | no  | no  | no  |
| sweden | bacillus cereus                | Bacteria | yes | yes | no  |
| sweden | streptococcus mitis            | Bacteria | yes | no  | no  |
| sweden | ruminococcus gnavus            | Bacteria | no  | no  | no  |
| sweden | toxoplasma gondii              | Protozoa | yes | yes | yes |
| sweden | chlamydomyces psittaci         | Bacteria | yes | yes | no  |
| sweden | puumala virus                  | Virus    | yes | yes | yes |
| sweden | bordetella bronchiseptica      | Bacteria | yes | yes | no  |
| sweden | sindbis virus                  | Virus    | yes | yes | yes |
| sweden | primate t-lymphotropic virus 1 | Virus    | no  | no  | no  |
| sweden | bovine papillomavirus 1        | Virus    | no  | no  | no  |
| sweden | brachyspira canis              | Bacteria | no  | no  | no  |
| sweden | human immunodeficiency virus 2 | Virus    | yes | no  | yes |
| sweden | escherichia coli               | Bacteria | yes | yes | yes |
| sweden | streptococcus sanguinis        | Bacteria | yes | no  | no  |
| sweden | brachyspira intermedia         | Bacteria | no  | no  | no  |
| sweden | human herpesvirus 2            | Virus    | no  | no  | no  |
| sweden | entamoeba bovis                | Protozoa | no  | no  | no  |
| sweden | brachyspira alvinipulli        | Bacteria | no  | no  | no  |
| sweden | elaphostrongylus alces         | Helminth | no  | no  | no  |
| sweden | lysiniibacillus fusiformis     | Bacteria | no  | no  | no  |
| sweden | human enterovirus b            | Virus    | yes | no  | yes |
| sweden | bacillus amyloliquefaciens     | Bacteria | no  | no  | no  |
| sweden | tick-borne encephalitis virus  | Virus    | no  | no  | no  |
| sweden | staphylococcus haemolyticus    | Bacteria | yes | yes | no  |
| sweden | gemella haemolysans            | Bacteria | no  | no  | no  |
| sweden | chimaericola leptogaster       | Helminth | no  | no  | no  |
| sweden | campylobacter coli             | Bacteria | yes | yes | no  |
| sweden | brachyspira pulli              | Bacteria | no  | no  | no  |
| sweden | staphylococcus aureus          | Bacteria | yes | yes | yes |
| sweden | morganella morganii            | Bacteria | yes | yes | no  |
| sweden | bacteroides ovatus             | Bacteria | yes | no  | no  |
| sweden | propionibacterium acnes        | Bacteria | yes | yes | no  |
| sweden | human herpesvirus 1            | Virus    | no  | no  | no  |
| sweden | entamoeba polecki              | Protozoa | yes | yes | no  |

|             |                                     |          |     |     |     |
|-------------|-------------------------------------|----------|-----|-----|-----|
| sweden      | <i>fusobacterium nucleatum</i>      | Bacteria | yes | yes | no  |
| sweden      | <i>schizophyllum commune</i>        | Fungi    | yes | no  | no  |
| sweden      | <i>aggregatibacter segnis</i>       | Bacteria | no  | no  | no  |
| sweden      | hepatitis e virus                   | Virus    | yes | yes | yes |
| sweden      | <i>brachyspira pilosicoli</i>       | Bacteria | no  | no  | no  |
| sweden      | <i>streptococcus agalactiae</i>     | Bacteria | yes | yes | no  |
| sweden      | <i>clostridium tertium</i>          | Bacteria | yes | yes | no  |
| sweden      | <i>acremonium strictum</i>          | Fungi    | yes | no  | no  |
| sweden      | <i>lactobacillus casei</i>          | Bacteria | no  | no  | no  |
| sweden      | <i>cryptosporidium hominis</i>      | Protozoa | yes | no  | yes |
| sweden      | <i>neisseria gonorrhoeae</i>        | Bacteria | yes | no  | yes |
| sweden      | <i>borrelia burgdorferi</i>         | Bacteria | yes | yes | yes |
| sweden      | <i>lecythophora lignicola</i>       | Fungi    | no  | no  | no  |
| switzerland | <i>babesia divergens</i>            | Protozoa | yes | yes | no  |
| switzerland | feline immunodeficiency virus       | Virus    | no  | no  | no  |
| switzerland | <i>epicoccum nigrum</i>             | Fungi    | no  | no  | no  |
| switzerland | <i>chlamydomyces abortus</i>        | Bacteria | no  | no  | no  |
| switzerland | human enterovirus a                 | Virus    | yes | no  | no  |
| switzerland | <i>staphylococcus rostri</i>        | Bacteria | no  | no  | no  |
| switzerland | <i>caryophyllaeus laticeps</i>      | Helminth | no  | no  | no  |
| switzerland | <i>borrelia spielmanii</i>          | Bacteria | no  | no  | no  |
| switzerland | <i>neisseria cinerea</i>            | Bacteria | yes | no  | no  |
| switzerland | <i>echinococcus ortleppi</i>        | Helminth | no  | no  | no  |
| switzerland | <i>campylobacter coli</i>           | Bacteria | yes | yes | no  |
| switzerland | <i>penicillium biourgeianum</i>     | Fungi    | no  | no  | no  |
| switzerland | <i>corynebacterium mastitidis</i>   | Bacteria | no  | no  | no  |
| switzerland | <i>borrelia afzelii</i>             | Bacteria | no  | no  | no  |
| switzerland | <i>ascaris suum</i>                 | Helminth | yes | yes | no  |
| switzerland | <i>diphyllobothrium dendriticum</i> | Helminth | yes | yes | no  |
| switzerland | border disease virus                | Virus    | no  | no  | no  |
| switzerland | <i>aspergillus flavus</i>           | Fungi    | no  | no  | no  |
| switzerland | <i>aeromonas salmonicida</i>        | Bacteria | no  | no  | no  |
| switzerland | bovine papillomavirus 1             | Virus    | no  | no  | no  |
| switzerland | <i>aeromonas hydrophila</i>         | Bacteria | yes | yes | yes |
| switzerland | equine rhinitis b virus             | Virus    | no  | no  | no  |
| switzerland | <i>cyathocephalus truncatus</i>     | Helminth | no  | no  | no  |
| switzerland | <i>trichobilharzia franki</i>       | Helminth | no  | no  | no  |
| switzerland | equid herpesvirus 2                 | Virus    | no  | no  | no  |
| switzerland | <i>varibaculum cambriense</i>       | Bacteria | no  | no  | no  |
| switzerland | <i>histophilus somni</i>            | Bacteria | no  | no  | no  |
| switzerland | <i>corynebacterium amycolatum</i>   | Bacteria | yes | no  | yes |
| switzerland | <i>trichobilharzia regenti</i>      | Helminth | no  | no  | no  |
| switzerland | bovine viral diarrhea virus 1       | Virus    | no  | no  | no  |
| switzerland | <i>actinomyces funkei</i>           | Bacteria | no  | no  | no  |
| switzerland | tula virus                          | Virus    | no  | no  | no  |
| switzerland | <i>borrelia garinii</i>             | Bacteria | no  | no  | no  |
| switzerland | <i>streptococcus dysgalactiae</i>   | Bacteria | no  | no  | no  |
| switzerland | <i>staphylococcus fleurettii</i>    | Bacteria | no  | no  | no  |
| switzerland | <i>lactobacillus fermentum</i>      | Bacteria | no  | no  | no  |
| switzerland | <i>arthroderma gypseum</i>          | Fungi    | no  | no  | no  |

|             |                                      |          |     |     |     |
|-------------|--------------------------------------|----------|-----|-----|-----|
| switzerland | human enterovirus b                  | Virus    | yes | no  | yes |
| switzerland | cordyceps bassiana                   | Fungi    | no  | no  | no  |
| switzerland | pantoea agglomerans                  | Bacteria | yes | yes | no  |
| switzerland | cryptococcus neoformans              | Fungi    | yes | yes | yes |
| switzerland | european bat lyssavirus 2            | Virus    | yes | yes | no  |
| switzerland | diphyllobothrium latum               | Helminth | yes | yes | no  |
| switzerland | staphylococcus aureus                | Bacteria | yes | yes | yes |
| switzerland | escherichia coli                     | Bacteria | yes | yes | yes |
| switzerland | human immunodeficiency virus 1       | Virus    | yes | no  | yes |
| switzerland | human rhinovirus c                   | Virus    | no  | no  | no  |
| switzerland | aeromonas tecta                      | Bacteria | no  | no  | no  |
| switzerland | anaplasma phagocytophilum            | Bacteria | no  | no  | no  |
| switzerland | lactobacillus plantarum              | Bacteria | no  | no  | no  |
| switzerland | elephantid herpesvirus 1             | Virus    | no  | no  | no  |
| switzerland | borna disease virus                  | Virus    | yes | yes | no  |
| switzerland | staphylococcus succinus              | Bacteria | no  | no  | no  |
| switzerland | pseudomonas chlororaphis             | Bacteria | no  | no  | no  |
| switzerland | mucor hiemalis                       | Fungi    | yes | no  | no  |
| switzerland | influenza b virus                    | Virus    | yes | yes | no  |
| switzerland | amphibocystidium ranae               | Others   | no  | no  | no  |
| switzerland | chlamydomyces pneumoniae             | Bacteria | yes | yes | no  |
| switzerland | actinomyces georgiae                 | Bacteria | yes | no  | no  |
| switzerland | aureobasidium pullulans              | Fungi    | yes | no  | no  |
| switzerland | norwalk virus                        | Virus    | yes | no  | yes |
| switzerland | anaplasma marginale                  | Bacteria | no  | no  | no  |
| switzerland | alternaria alternata                 | Fungi    | yes | yes | no  |
| switzerland | babesia microti                      | Protozoa | yes | yes | yes |
| switzerland | actinobacillus pleuropneumoniae      | Bacteria | yes | yes | no  |
| switzerland | mycoplasma haemofelis                | Bacteria | no  | no  | no  |
| switzerland | staphylococcus epidermidis           | Bacteria | yes | yes | yes |
| switzerland | equine rhinitis a virus              | Virus    | no  | no  | no  |
| switzerland | alphacoronavirus 1                   | Virus    | no  | no  | no  |
| switzerland | botryosphaeria dothidea              | Fungi    | no  | no  | no  |
| switzerland | foot-and-mouth disease virus         | Virus    | no  | no  | no  |
| switzerland | haemophilus influenzae               | Bacteria | yes | no  | yes |
| switzerland | streptococcus pneumoniae             | Bacteria | yes | yes | yes |
| switzerland | hepatitis b virus                    | Virus    | yes | no  | yes |
| switzerland | babesia equi                         | Protozoa | no  | no  | no  |
| switzerland | pseudomonas putida                   | Bacteria | yes | no  | no  |
| switzerland | equine arteritis virus               | Virus    | no  | no  | no  |
| switzerland | caprine arthritis encephalitis virus | Virus    | no  | no  | no  |
| switzerland | rhodococcus erythropolis             | Bacteria | yes | no  | no  |
| switzerland | diphyllobothrium nihonkaiense        | Helminth | yes | yes | no  |
| switzerland | beauveria bassiana                   | Fungi    | yes | no  | no  |
| switzerland | cryptosporidium parvum               | Protozoa | yes | yes | yes |
| switzerland | influenza a virus                    | Virus    | yes | yes | yes |
| switzerland | bacillus cereus                      | Bacteria | yes | yes | no  |
| switzerland | tick-borne encephalitis virus        | Virus    | no  | no  | no  |
| switzerland | alloiococcus otitis                  | Bacteria | no  | no  | no  |
| switzerland | staphylococcus haemolyticus          | Bacteria | yes | yes | no  |

|             |                                  |          |     |     |     |
|-------------|----------------------------------|----------|-----|-----|-----|
| switzerland | staphylococcus lentus            | Bacteria | no  | no  | no  |
| switzerland | treponema putidum                | Bacteria | no  | no  | no  |
| switzerland | actinobacillus porcitonisillarum | Bacteria | no  | no  | no  |
| switzerland | fusobacterium nucleatum          | Bacteria | yes | yes | no  |
| switzerland | measles virus                    | Virus    | yes | yes | yes |
| switzerland | pseudomonas aeruginosa           | Bacteria | yes | yes | yes |
| switzerland | human immunodeficiency virus 2   | Virus    | yes | no  | yes |
| switzerland | staphylococcus xylosus           | Bacteria | no  | no  | no  |
| switzerland | brevibacterium sanguinis         | Bacteria | no  | no  | no  |
| switzerland | plasmodium falciparum            | Protozoa | yes | no  | yes |
| switzerland | rickettsia helvetica             | Bacteria | yes | no  | no  |
| switzerland | lactobacillus paracasei          | Bacteria | no  | no  | no  |
| switzerland | echinococcus multilocularis      | Helminth | yes | yes | no  |
| switzerland | pseudallescheria boydii          | Fungi    | no  | no  | no  |
| switzerland | lecythophora hoffmannii          | Fungi    | yes | no  | no  |
| switzerland | staphylococcus pseudintermedius  | Bacteria | no  | no  | no  |
| switzerland | mesocestoides corti              | Helminth | no  | no  | no  |
| switzerland | aeromonas bestiarum              | Bacteria | no  | no  | no  |
| switzerland | babesia canis                    | Protozoa | no  | no  | no  |
| syria       | bacillus thuringiensis           | Bacteria | yes | no  | no  |
| syria       | foot-and-mouth disease virus     | Virus    | no  | no  | no  |
| syria       | human enterovirus c              | Virus    | yes | no  | no  |
| syria       | pasteurella multocida            | Bacteria | yes | yes | no  |
| syria       | hepatitis c virus                | Virus    | yes | no  | yes |
| syria       | penicillium chrysogenum          | Fungi    | yes | no  | no  |
| syria       | human astrovirus                 | Virus    | yes | no  | yes |
| syria       | babesia bovis                    | Protozoa | yes | yes | no  |
| syria       | measles virus                    | Virus    | yes | yes | yes |
| syria       | leishmania major                 | Protozoa | yes | yes | no  |
| syria       | camelpox virus                   | Virus    | no  | no  | no  |
| syria       | cordyceps bassiana               | Fungi    | no  | no  | no  |
| syria       | babesia bigemina                 | Protozoa | no  | no  | no  |
| syria       | hepatitis b virus                | Virus    | yes | no  | yes |
| syria       | sinorhizobium medicae            | Bacteria | no  | no  | no  |
| taiwan      | acanthamoeba castellanii         | Protozoa | no  | no  | no  |
| taiwan      | simian virus 40                  | Virus    | no  | no  | no  |
| taiwan      | aeromonas caviae                 | Bacteria | yes | yes | yes |
| taiwan      | meyerozyma guilliermondii        | Fungi    | no  | no  | no  |
| taiwan      | hepatitis delta virus            | Virus    | yes | no  | no  |
| taiwan      | elizabethkingia meningoseptica   | Bacteria | no  | no  | no  |
| taiwan      | acanthamoeba lenticulata         | Protozoa | no  | no  | no  |
| taiwan      | mycobacterium avium              | Bacteria | yes | yes | yes |
| taiwan      | acanthamoeba polyphaga           | Protozoa | yes | no  | no  |
| taiwan      | avian leukosis virus             | Virus    | no  | no  | no  |
| taiwan      | nocardia seriolae                | Bacteria | no  | no  | no  |
| taiwan      | campylobacter coli               | Bacteria | yes | yes | no  |
| taiwan      | rhodotorula mucilaginosa         | Fungi    | yes | yes | no  |
| taiwan      | mycoplasma haemofelis            | Bacteria | no  | no  | no  |
| taiwan      | bacillus licheniformis           | Bacteria | yes | yes | no  |
| taiwan      | giardia intestinalis             | Protozoa | no  | no  | no  |

|        |                                     |          |     |     |     |
|--------|-------------------------------------|----------|-----|-----|-----|
| taiwan | <i>candida intermedia</i>           | Fungi    | yes | no  | no  |
| taiwan | <i>moraxella catarrhalis</i>        | Bacteria | no  | no  | no  |
| taiwan | <i>pseudomonas putida</i>           | Bacteria | yes | no  | no  |
| taiwan | <i>wuchereria bancrofti</i>         | Helminth | yes | no  | yes |
| taiwan | human herpesvirus 4                 | Virus    | no  | no  | no  |
| taiwan | <i>penicillium polonicum</i>        | Fungi    | no  | no  | no  |
| taiwan | <i>enterobacter cloacae</i>         | Bacteria | yes | yes | no  |
| taiwan | <i>stenotrophomonas maltophilia</i> | Bacteria | no  | no  | no  |
| taiwan | influenza b virus                   | Virus    | yes | yes | no  |
| taiwan | reticuloendotheliosis virus         | Virus    | no  | no  | no  |
| taiwan | <i>trichosporon asahii</i>          | Fungi    | yes | yes | no  |
| taiwan | human adenovirus c                  | Virus    | yes | no  | no  |
| taiwan | <i>saccharomyces cerevisiae</i>     | Fungi    | yes | no  | no  |
| taiwan | <i>pseudozyma hubeiensis</i>        | Fungi    | no  | no  | no  |
| taiwan | <i>legionella pneumophila</i>       | Bacteria | yes | no  | yes |
| taiwan | <i>plasmodium falciparum</i>        | Protozoa | yes | no  | yes |
| taiwan | <i>ehrlichia canis</i>              | Bacteria | no  | no  | no  |
| taiwan | <i>morganella morganii</i>          | Bacteria | yes | yes | no  |
| taiwan | suid herpesvirus 1                  | Virus    | no  | no  | no  |
| taiwan | human herpesvirus 5                 | Virus    | yes | no  | yes |
| taiwan | <i>bacillus subtilis</i>            | Bacteria | yes | yes | no  |
| taiwan | human papillomavirus 16             | Virus    | no  | no  | no  |
| taiwan | <i>gibberella intermedia</i>        | Fungi    | no  | no  | no  |
| taiwan | <i>trichosporon mucoides</i>        | Fungi    | yes | yes | no  |
| taiwan | <i>mycoplasma pneumoniae</i>        | Bacteria | yes | no  | no  |
| taiwan | <i>babesia microti</i>              | Protozoa | yes | yes | yes |
| taiwan | <i>pseudomonas stutzeri</i>         | Bacteria | yes | no  | no  |
| taiwan | <i>pasteurella multocida</i>        | Bacteria | yes | yes | no  |
| taiwan | <i>campylobacter jejuni</i>         | Bacteria | yes | yes | yes |
| taiwan | human herpesvirus 1                 | Virus    | no  | no  | no  |
| taiwan | hepatitis e virus                   | Virus    | yes | yes | yes |
| taiwan | <i>angiostrongylus cantonensis</i>  | Helminth | yes | no  | no  |
| taiwan | <i>streptococcus agalactiae</i>     | Bacteria | yes | yes | no  |
| taiwan | <i>entamoeba coli</i>               | Protozoa | no  | no  | no  |
| taiwan | <i>mycobacterium fortuitum</i>      | Bacteria | no  | no  | no  |
| taiwan | human enterovirus c                 | Virus    | yes | no  | no  |
| taiwan | <i>avibacterium paragallinarum</i>  | Bacteria | no  | no  | no  |
| taiwan | <i>helicobacter pylori</i>          | Bacteria | yes | yes | no  |
| taiwan | <i>clonorchis sinensis</i>          | Helminth | yes | no  | no  |
| taiwan | <i>vibrio harveyi</i>               | Bacteria | no  | no  | no  |
| taiwan | <i>pediococcus acidilactici</i>     | Bacteria | no  | no  | no  |
| taiwan | <i>klebsiella pneumoniae</i>        | Bacteria | yes | yes | yes |
| taiwan | <i>hepatozoon canis</i>             | Protozoa | no  | no  | no  |
| taiwan | norwalk virus                       | Virus    | yes | no  | yes |
| taiwan | <i>leuconostoc citreum</i>          | Bacteria | no  | no  | no  |
| taiwan | <i>pneumocystis carinii</i>         | Fungi    | yes | yes | yes |
| taiwan | bk polyomavirus                     | Virus    | no  | no  | no  |
| taiwan | <i>neisseria shayeganii</i>         | Bacteria | no  | no  | no  |
| taiwan | <i>pediococcus pentosaceus</i>      | Bacteria | no  | no  | no  |
| taiwan | <i>bacillus pumilus</i>             | Bacteria | yes | no  | no  |

|        |                                         |          |     |     |     |
|--------|-----------------------------------------|----------|-----|-----|-----|
| taiwan | naegleria australiensis                 | Protozoa | no  | no  | no  |
| taiwan | human enterovirus d                     | Virus    | yes | no  | no  |
| taiwan | anguillicoloides crassus                | Helminth | no  | no  | no  |
| taiwan | entamoeba histolytica                   | Protozoa | yes | yes | no  |
| taiwan | naegleria clarki                        | Protozoa | no  | no  | no  |
| taiwan | foot-and-mouth disease virus            | Virus    | no  | no  | no  |
| taiwan | leuconostoc mesenteroides               | Bacteria | no  | no  | no  |
| taiwan | akabane virus                           | Virus    | no  | no  | no  |
| taiwan | seoul virus                             | Virus    | yes | yes | yes |
| taiwan | avian coronavirus                       | Virus    | no  | no  | no  |
| taiwan | trichuris trichiura                     | Helminth | yes | yes | no  |
| taiwan | proteus mirabilis                       | Bacteria | yes | yes | no  |
| taiwan | schizophyllum commune                   | Fungi    | yes | no  | no  |
| taiwan | human adenovirus b                      | Virus    | yes | no  | no  |
| taiwan | duck adenovirus a                       | Virus    | no  | no  | no  |
| taiwan | candida albicans                        | Fungi    | yes | yes | yes |
| taiwan | canine distemper virus                  | Virus    | no  | no  | no  |
| taiwan | neocallimastix frontalis                | Fungi    | no  | no  | no  |
| taiwan | vibrio parahaemolyticus                 | Bacteria | yes | yes | yes |
| taiwan | schistosoma japonicum                   | Helminth | yes | yes | no  |
| taiwan | phanerochaete sordida                   | Fungi    | no  | no  | no  |
| taiwan | acinetobacter baumannii                 | Bacteria | yes | no  | no  |
| taiwan | mycobacterium mucogenicum               | Bacteria | yes | yes | no  |
| taiwan | goose parvovirus                        | Virus    | no  | no  | no  |
| taiwan | human immunodeficiency virus 2          | Virus    | yes | no  | yes |
| taiwan | budgerigar fledgling disease polyomav   | Virus    | no  | no  | no  |
| taiwan | mycobacterium abscessus                 | Bacteria | yes | yes | no  |
| taiwan | pseudomonas aeruginosa                  | Bacteria | yes | yes | yes |
| taiwan | theileria sergenti                      | Protozoa | no  | no  | no  |
| taiwan | coxiella burnetii                       | Bacteria | yes | yes | no  |
| taiwan | infectious spleen and kidney necrosis v | Virus    | no  | no  | no  |
| taiwan | babesia canis                           | Protozoa | no  | no  | no  |
| taiwan | bluetongue virus                        | Virus    | no  | no  | no  |
| taiwan | ross river virus                        | Virus    | yes | yes | yes |
| taiwan | vibrio shilonii                         | Bacteria | no  | no  | no  |
| taiwan | chlamydomyces pneumoniae                | Bacteria | yes | yes | no  |
| taiwan | porcine enterovirus b                   | Virus    | no  | no  | no  |
| taiwan | candida glabrata                        | Fungi    | yes | yes | yes |
| taiwan | hepatitis a virus                       | Virus    | yes | yes | yes |
| taiwan | candida parapsilosis                    | Fungi    | yes | yes | no  |
| taiwan | williamsia serinedens                   | Bacteria | no  | no  | no  |
| taiwan | human herpesvirus 3                     | Virus    | no  | no  | no  |
| taiwan | escherichia coli                        | Bacteria | yes | yes | yes |
| taiwan | bacillus thuringiensis                  | Bacteria | yes | no  | no  |
| taiwan | leuconostoc pseudomesenteroides         | Bacteria | no  | no  | no  |
| taiwan | penicillium marneffeii                  | Fungi    | yes | yes | yes |
| taiwan | human rhinovirus a                      | Virus    | yes | no  | no  |
| taiwan | neisseria gonorrhoeae                   | Bacteria | yes | no  | yes |
| taiwan | redspotted grouper nervous necrosis v   | Virus    | no  | no  | no  |
| taiwan | human metapneumovirus                   | Virus    | no  | no  | no  |

|        |                                        |          |     |     |     |
|--------|----------------------------------------|----------|-----|-----|-----|
| taiwan | alphacoronavirus 1                     | Virus    | no  | no  | no  |
| taiwan | strongyloides stercoralis              | Helminth | yes | yes | yes |
| taiwan | rhodotorula slooffiae                  | Fungi    | no  | no  | no  |
| taiwan | vibrio vulnificus                      | Bacteria | yes | yes | yes |
| taiwan | duck parvovirus                        | Virus    | no  | no  | no  |
| taiwan | weissella confusa                      | Bacteria | no  | no  | no  |
| taiwan | babesia gibsoni                        | Protozoa | yes | yes | no  |
| taiwan | acinetobacter lwoffii                  | Bacteria | yes | no  | no  |
| taiwan | botryosphaeria dothidea                | Fungi    | no  | no  | no  |
| taiwan | burkholderia pseudomallei              | Bacteria | yes | yes | no  |
| taiwan | cupriavidus taiwanensis                | Bacteria | no  | no  | no  |
| taiwan | burkholderia cepacia                   | Bacteria | yes | no  | no  |
| taiwan | hepatitis b virus                      | Virus    | yes | no  | yes |
| taiwan | mycobacterium kansasii                 | Bacteria | yes | yes | no  |
| taiwan | shewanella putrefaciens                | Bacteria | no  | no  | no  |
| taiwan | lactococcus lactis                     | Bacteria | no  | no  | no  |
| taiwan | fusarium solani                        | Fungi    | yes | yes | yes |
| taiwan | porcine reproductive and respiratory s | Virus    | no  | no  | no  |
| taiwan | borrelia valaisiana                    | Bacteria | no  | no  | no  |
| taiwan | human enterovirus a                    | Virus    | yes | no  | no  |
| taiwan | enterobius vermicularis                | Helminth | yes | yes | no  |
| taiwan | human parvovirus b19                   | Virus    | no  | no  | no  |
| taiwan | shigella sonnei                        | Bacteria | yes | yes | no  |
| taiwan | pichia kudriavzevii                    | Fungi    | no  | no  | no  |
| taiwan | rotavirus a                            | Virus    | yes | yes | yes |
| taiwan | lactobacillus sakei                    | Bacteria | no  | no  | no  |
| taiwan | xanthomonas campestris                 | Bacteria | no  | no  | no  |
| taiwan | staphylococcus aureus                  | Bacteria | yes | yes | yes |
| taiwan | enterococcus faecium                   | Bacteria | yes | yes | yes |
| taiwan | dirofilaria immitis                    | Helminth | yes | yes | no  |
| taiwan | lactobacillus plantarum                | Bacteria | no  | no  | no  |
| taiwan | measles virus                          | Virus    | yes | yes | yes |
| taiwan | neisseria meningitidis                 | Bacteria | yes | no  | yes |
| taiwan | bacillus megaterium                    | Bacteria | no  | no  | no  |
| taiwan | plasmodium inui                        | Protozoa | no  | no  | no  |
| taiwan | cryptococcus gattii                    | Fungi    | no  | no  | no  |
| taiwan | human papillomavirus 18                | Virus    | no  | no  | no  |
| taiwan | cryptococcus neoformans                | Fungi    | yes | yes | yes |
| taiwan | cyprinid herpesvirus 3                 | Virus    | no  | no  | no  |
| taiwan | streptococcus pneumoniae               | Bacteria | yes | yes | yes |
| taiwan | staphylococcus epidermidis             | Bacteria | yes | yes | yes |
| taiwan | lactococcus garvieae                   | Bacteria | no  | no  | no  |
| taiwan | feline leukemia virus                  | Virus    | no  | no  | no  |
| taiwan | cladosporium cladosporioides           | Fungi    | yes | no  | no  |
| taiwan | enterococcus casseliflavus             | Bacteria | yes | no  | no  |
| taiwan | borrelia garinii                       | Bacteria | no  | no  | no  |
| taiwan | weissella paramesenteroides            | Bacteria | no  | no  | no  |
| taiwan | beak and feather disease virus         | Virus    | no  | no  | no  |
| taiwan | debaryomyces hansenii                  | Fungi    | no  | no  | no  |
| taiwan | leuconostoc fallax                     | Bacteria | no  | no  | no  |



|        |                                       |          |     |     |     |
|--------|---------------------------------------|----------|-----|-----|-----|
| taiwan | bacteroides fragilis                  | Bacteria | yes | yes | no  |
| taiwan | bordetella pertussis                  | Bacteria | yes | no  | yes |
| taiwan | desmospora activa                     | Bacteria | no  | no  | no  |
| taiwan | toxoplasma gondii                     | Protozoa | yes | yes | yes |
| taiwan | ascaris lumbricoides                  | Helminth | yes | yes | no  |
| taiwan | aeromonas hydrophila                  | Bacteria | yes | yes | yes |
| taiwan | opisthorchis viverrini                | Helminth | yes | yes | no  |
| taiwan | severe acute respiratory syndrome-rel | Virus    | no  | no  | no  |
| taiwan | bacillus amyloliquefaciens            | Bacteria | no  | no  | no  |
| taiwan | photobacterium damsela                | Bacteria | yes | yes | no  |
| taiwan | bacillus cereus                       | Bacteria | yes | yes | no  |
| taiwan | human herpesvirus 8                   | Virus    | yes | no  | yes |
| taiwan | aspergillus niger                     | Fungi    | yes | yes | no  |
| taiwan | haemophilus influenzae                | Bacteria | yes | no  | yes |
| taiwan | chicken anemia virus                  | Virus    | no  | no  | no  |
| taiwan | newcastle disease virus               | Virus    | yes | yes | no  |
| taiwan | orf virus                             | Virus    | yes | yes | no  |
| taiwan | streptococcus pyogenes                | Bacteria | yes | yes | yes |
| taiwan | enterococcus faecalis                 | Bacteria | yes | yes | yes |
| taiwan | taenia asiatica                       | Helminth | no  | no  | no  |
| taiwan | dengue virus                          | Virus    | no  | no  | no  |
| taiwan | rhodococcus erythropolis              | Bacteria | yes | no  | no  |
| taiwan | mycobacterium marinum                 | Bacteria | yes | yes | yes |
| taiwan | fusarium oxysporum                    | Fungi    | yes | no  | yes |
| taiwan | epizootic hemorrhagic disease virus   | Virus    | no  | no  | no  |
| taiwan | infectious bursal disease virus       | Virus    | no  | no  | no  |
| taiwan | rhodotorula minuta                    | Fungi    | yes | no  | no  |
| taiwan | feline panleukopenia virus            | Virus    | no  | no  | no  |
| taiwan | orientia tsutsugamushi                | Bacteria | yes | yes | no  |
| taiwan | vibrio cholerae                       | Bacteria | yes | no  | yes |
| taiwan | human enterovirus b                   | Virus    | yes | no  | yes |
| taiwan | shigella flexneri                     | Bacteria | yes | yes | no  |
| taiwan | human immunodeficiency virus 1        | Virus    | yes | no  | yes |
| taiwan | santee-cooper ranavirus               | Virus    | no  | no  | no  |
| taiwan | anisakis typica                       | Helminth | no  | no  | no  |
| taiwan | chlamydia trachomatis                 | Bacteria | yes | yes | yes |
| taiwan | hepatitis c virus                     | Virus    | yes | no  | yes |
| taiwan | primate t-lymphotropic virus 1        | Virus    | no  | no  | no  |
| taiwan | feline immunodeficiency virus         | Virus    | no  | no  | no  |
| taiwan | listeria monocytogenes                | Bacteria | yes | yes | yes |
| taiwan | clavospora lusitaniae                 | Fungi    | no  | no  | no  |
| taiwan | chikungunya virus                     | Virus    | yes | yes | yes |
| taiwan | mycobacterium xenopi                  | Bacteria | yes | yes | no  |
| taiwan | vibrio alginolyticus                  | Bacteria | yes | yes | no  |
| taiwan | caecomyces communis                   | Fungi    | no  | no  | no  |
| taiwan | actinobacillus pleuropneumoniae       | Bacteria | yes | yes | no  |
| taiwan | pseudomonas fluorescens               | Bacteria | yes | no  | no  |
| taiwan | cryptococcus laurentii                | Fungi    | no  | no  | no  |
| taiwan | acinetobacter junii                   | Bacteria | yes | no  | no  |
| taiwan | mycobacterium tuberculosis            | Bacteria | yes | yes | yes |

|            |                                       |          |     |     |     |
|------------|---------------------------------------|----------|-----|-----|-----|
| taiwan     | clostridium difficile                 | Bacteria | yes | yes | yes |
| taiwan     | piomyces polycephalus                 | Fungi    | no  | no  | no  |
| taiwan     | citrobacter freundii                  | Bacteria | yes | yes | no  |
| taiwan     | neoscytalidium dimidiatum             | Fungi    | no  | no  | no  |
| taiwan     | salmonella enterica                   | Bacteria | no  | no  | no  |
| taiwan     | wickerhamomyces anomalus              | Fungi    | no  | no  | no  |
| taiwan     | classical swine fever virus           | Virus    | no  | no  | no  |
| taiwan     | caprine arthritis encephalitis virus  | Virus    | no  | no  | no  |
| taiwan     | human adenovirus f                    | Virus    | yes | no  | no  |
| taiwan     | candida tropicalis                    | Fungi    | yes | yes | no  |
| taiwan     | methylobacterium radiotolerans        | Bacteria | no  | no  | no  |
| taiwan     | jc polyomavirus                       | Virus    | no  | no  | no  |
| taiwan     | influenza a virus                     | Virus    | yes | yes | yes |
| taiwan     | taenia saginata                       | Helminth | yes | yes | no  |
| taiwan     | rubella virus                         | Virus    | yes | no  | no  |
| taiwan     | bovine ephemeral fever virus          | Virus    | yes | yes | no  |
| taiwan     | paragonimus westermani                | Helminth | yes | yes | no  |
| taiwan     | borrelia burgdorferi                  | Bacteria | yes | yes | yes |
| taiwan     | geobacillus stearothermophilus        | Bacteria | no  | no  | no  |
| taiwan     | borrelia afzelii                      | Bacteria | no  | no  | no  |
| taiwan     | japanese encephalitis virus           | Virus    | yes | yes | yes |
| taiwan     | weissella cibaria                     | Bacteria | no  | no  | no  |
| taiwan     | serratia marcescens                   | Bacteria | yes | yes | yes |
| tajikistan | yersinia pestis                       | Bacteria | yes | yes | yes |
| tajikistan | bacillus amyloliquefaciens            | Bacteria | no  | no  | no  |
| tajikistan | babesia muratovi                      | Protozoa | no  | no  | no  |
| tajikistan | bacillus mojavensis                   | Bacteria | no  | no  | no  |
| tajikistan | crimean-congo hemorrhagic fever virus | Virus    | no  | no  | no  |
| tajikistan | hepatitis b virus                     | Virus    | yes | no  | yes |
| tajikistan | bacillus subtilis                     | Bacteria | yes | yes | no  |
| tajikistan | pseudallescheria ellipsoidea          | Fungi    | no  | no  | no  |
| tajikistan | west nile virus                       | Virus    | yes | yes | yes |
| tanzania   | variola virus                         | Virus    | no  | no  | no  |
| tanzania   | schistosoma mansoni                   | Helminth | yes | yes | yes |
| tanzania   | cryptococcus neoformans               | Fungi    | yes | yes | yes |
| tanzania   | foot-and-mouth disease virus          | Virus    | no  | no  | no  |
| tanzania   | rabies virus                          | Virus    | yes | yes | yes |
| tanzania   | human immunodeficiency virus 2        | Virus    | yes | no  | yes |
| tanzania   | simian immunodeficiency virus         | Virus    | no  | no  | no  |
| tanzania   | mycobacterium bovis                   | Bacteria | yes | yes | yes |
| tanzania   | rift valley fever virus               | Virus    | yes | yes | yes |
| tanzania   | rinderpest virus                      | Virus    | no  | no  | no  |
| tanzania   | colletotrichum truncatum              | Fungi    | no  | no  | no  |
| tanzania   | trypanosoma congolense                | Protozoa | no  | no  | no  |
| tanzania   | schistosoma bovis                     | Helminth | yes | yes | no  |
| tanzania   | xanthomonas campestris                | Bacteria | no  | no  | no  |
| tanzania   | ancylostoma duodenale                 | Helminth | yes | yes | no  |
| tanzania   | brucella melitensis                   | Bacteria | yes | yes | yes |
| tanzania   | trypanosoma brucei                    | Protozoa | yes | yes | yes |
| tanzania   | staphylococcus aureus                 | Bacteria | yes | yes | yes |

|          |                                  |          |     |     |     |
|----------|----------------------------------|----------|-----|-----|-----|
| tanzania | trypanosoma simiae               | Protozoa | no  | no  | no  |
| tanzania | borrelia duttonii                | Bacteria | yes | no  | no  |
| tanzania | diplostomum mashonense           | Helminth | no  | no  | no  |
| tanzania | chlamydia trachomatis            | Bacteria | yes | yes | yes |
| tanzania | polystoma dawiekoki              | Helminth | no  | no  | no  |
| tanzania | fusarium oxysporum               | Fungi    | yes | no  | yes |
| tanzania | peste-des-petits-ruminants virus | Virus    | no  | no  | no  |
| tanzania | campylobacter troglodytis        | Bacteria | no  | no  | no  |
| tanzania | mycoplasma haemofelis            | Bacteria | no  | no  | no  |
| tanzania | feline immunodeficiency virus    | Virus    | no  | no  | no  |
| tanzania | trichuris trichiura              | Helminth | yes | yes | no  |
| tanzania | strongyloides stercoralis        | Helminth | yes | yes | yes |
| tanzania | wuchereria bancrofti             | Helminth | yes | no  | yes |
| tanzania | hepatitis b virus                | Virus    | yes | no  | yes |
| tanzania | mycobacterium tuberculosis       | Bacteria | yes | yes | yes |
| tanzania | vibrio cholerae                  | Bacteria | yes | no  | yes |
| tanzania | african swine fever virus        | Virus    | no  | no  | no  |
| tanzania | taenia solium                    | Helminth | yes | no  | yes |
| tanzania | chikungunya virus                | Virus    | yes | yes | yes |
| tanzania | newcastle disease virus          | Virus    | yes | yes | no  |
| tanzania | plasmodium falciparum            | Protozoa | yes | no  | yes |
| tanzania | jc polyomavirus                  | Virus    | no  | no  | no  |
| tanzania | neisseria gonorrhoeae            | Bacteria | yes | no  | yes |
| tanzania | fasciola gigantica               | Helminth | yes | yes | no  |
| tanzania | necator americanus               | Helminth | yes | yes | no  |
| tanzania | escherichia coli                 | Bacteria | yes | yes | yes |
| tanzania | ascaris lumbricoides             | Helminth | yes | yes | no  |
| tanzania | human immunodeficiency virus 1   | Virus    | yes | no  | yes |
| tanzania | infectious bursal disease virus  | Virus    | no  | no  | no  |
| tanzania | treponema pallidum               | Bacteria | yes | no  | yes |
| tanzania | schistosoma haematobium          | Helminth | yes | yes | no  |
| tanzania | alphacoronavirus 1               | Virus    | no  | no  | no  |
| tanzania | human herpesvirus 2              | Virus    | no  | no  | no  |
| tanzania | candida albicans                 | Fungi    | yes | yes | yes |
| tanzania | strongyloides fuelleborni        | Helminth | yes | yes | no  |
| thailand | plasmodium knowlesi              | Protozoa | yes | yes | no  |
| thailand | taenia asiatica                  | Helminth | no  | no  | no  |
| thailand | candida parapsilosis             | Fungi    | yes | yes | no  |
| thailand | rotavirus c                      | Virus    | yes | yes | yes |
| thailand | spirometra erinaceieuropaei      | Helminth | no  | no  | no  |
| thailand | staphylococcus aureus            | Bacteria | yes | yes | yes |
| thailand | torque teno sus virus 2          | Virus    | no  | no  | no  |
| thailand | legionella pneumophila           | Bacteria | yes | no  | yes |
| thailand | vibrio harveyi                   | Bacteria | no  | no  | no  |
| thailand | aeromonas hydrophila             | Bacteria | yes | yes | yes |
| thailand | trypanosoma evansi               | Protozoa | no  | no  | no  |
| thailand | kluveromyces marxianus           | Fungi    | no  | no  | no  |
| thailand | treponema pallidum               | Bacteria | yes | no  | yes |
| thailand | penicillium marneffeii           | Fungi    | yes | yes | yes |
| thailand | borrelia valaisiana              | Bacteria | no  | no  | no  |

|          |                                    |          |     |     |     |
|----------|------------------------------------|----------|-----|-----|-----|
| thailand | feline immunodeficiency virus      | Virus    | no  | no  | no  |
| thailand | <i>lactobacillus brevis</i>        | Bacteria | no  | no  | no  |
| thailand | <i>arcobacter butzleri</i>         | Bacteria | yes | yes | no  |
| thailand | <i>klebsiella pneumoniae</i>       | Bacteria | yes | yes | yes |
| thailand | <i>weissella cibaria</i>           | Bacteria | no  | no  | no  |
| thailand | <i>bartonella quintana</i>         | Bacteria | yes | no  | no  |
| thailand | <i>streptococcus anginosus</i>     | Bacteria | yes | no  | no  |
| thailand | <i>pneumocystis jirovecii</i>      | Fungi    | no  | no  | no  |
| thailand | <i>babesia canis</i>               | Protozoa | no  | no  | no  |
| thailand | <i>bacillus subtilis</i>           | Bacteria | yes | yes | no  |
| thailand | <i>enterococcus faecalis</i>       | Bacteria | yes | yes | yes |
| thailand | torque teno sus virus 1            | Virus    | no  | no  | no  |
| thailand | <i>leptospira interrogans</i>      | Bacteria | yes | yes | yes |
| thailand | <i>cryptosporidium meleagridis</i> | Protozoa | no  | no  | no  |
| thailand | <i>agrobacterium tumefaciens</i>   | Bacteria | no  | no  | no  |
| thailand | human parechovirus                 | Virus    | no  | no  | no  |
| thailand | hepatitis b virus                  | Virus    | yes | no  | yes |
| thailand | <i>necator americanus</i>          | Helminth | yes | yes | no  |
| thailand | <i>fusarium solani</i>             | Fungi    | yes | yes | yes |
| thailand | <i>candida rugosa</i>              | Fungi    | yes | no  | no  |
| thailand | <i>bacillus megaterium</i>         | Bacteria | no  | no  | no  |
| thailand | <i>rickettsia akari</i>            | Bacteria | yes | yes | no  |
| thailand | human adenovirus b                 | Virus    | yes | no  | no  |
| thailand | human metapneumovirus              | Virus    | no  | no  | no  |
| thailand | <i>bacillus circulans</i>          | Bacteria | yes | no  | no  |
| thailand | <i>candida tropicalis</i>          | Fungi    | yes | yes | no  |
| thailand | human herpesvirus 5                | Virus    | yes | no  | yes |
| thailand | <i>haplorchis taichui</i>          | Helminth | yes | yes | no  |
| thailand | <i>achromobacter xylosoxidans</i>  | Bacteria | yes | no  | no  |
| thailand | japanese encephalitis virus        | Virus    | yes | yes | yes |
| thailand | <i>naegleria australiensis</i>     | Protozoa | no  | no  | no  |
| thailand | <i>plasmodium falciparum</i>       | Protozoa | yes | no  | yes |
| thailand | <i>streptococcus agalactiae</i>    | Bacteria | yes | yes | no  |
| thailand | <i>toxoplasma gondii</i>           | Protozoa | yes | yes | yes |
| thailand | <i>corynebacterium diphtheriae</i> | Bacteria | yes | no  | yes |
| thailand | hepatitis a virus                  | Virus    | yes | yes | yes |
| thailand | <i>paragonimus westermani</i>      | Helminth | yes | yes | no  |
| thailand | <i>streptococcus pneumoniae</i>    | Bacteria | yes | yes | yes |
| thailand | human papillomavirus 16            | Virus    | no  | no  | no  |
| thailand | <i>opisthorchis viverrini</i>      | Helminth | yes | yes | no  |
| thailand | <i>entamoeba histolytica</i>       | Protozoa | yes | yes | no  |
| thailand | human papillomavirus 18            | Virus    | no  | no  | no  |
| thailand | feline panleukopenia virus         | Virus    | no  | no  | no  |
| thailand | <i>candida membranifaciens</i>     | Fungi    | no  | no  | no  |
| thailand | <i>mycobacterium tuberculosis</i>  | Bacteria | yes | yes | yes |
| thailand | human enterovirus a                | Virus    | yes | no  | no  |
| thailand | <i>lactobacillus agilis</i>        | Bacteria | no  | no  | no  |
| thailand | classical swine fever virus        | Virus    | no  | no  | no  |
| thailand | <i>neosartorya fischeri</i>        | Fungi    | no  | no  | no  |
| thailand | human picobirnavirus               | Virus    | no  | no  | no  |

|          |                                       |          |     |     |     |
|----------|---------------------------------------|----------|-----|-----|-----|
| thailand | paragonimus heterotremus              | Helminth | yes | yes | no  |
| thailand | streptococcus constellatus            | Bacteria | yes | no  | no  |
| thailand | cryptosporidium hominis               | Protozoa | yes | no  | yes |
| thailand | candida nivariensis                   | Fungi    | no  | no  | no  |
| thailand | staphylococcus saprophyticus          | Bacteria | yes | no  | no  |
| thailand | plasmodium vivax                      | Protozoa | yes | no  | yes |
| thailand | lactobacillus fermentum               | Bacteria | no  | no  | no  |
| thailand | burkholderia pseudomallei             | Bacteria | yes | yes | no  |
| thailand | sporopachydermia lactativora          | Fungi    | no  | no  | no  |
| thailand | candida orthopsilosis                 | Fungi    | no  | no  | no  |
| thailand | human papillomavirus 26               | Virus    | no  | no  | no  |
| thailand | redspotted grouper nervous necrosis v | Virus    | no  | no  | no  |
| thailand | burkholderia mallei                   | Bacteria | yes | yes | no  |
| thailand | human herpesvirus 7                   | Virus    | yes | no  | no  |
| thailand | streptococcus iniae                   | Bacteria | no  | no  | no  |
| thailand | cephalobothrium aetobatidis           | Helminth | no  | no  | no  |
| thailand | kluvera ascorbata                     | Bacteria | yes | yes | no  |
| thailand | canine distemper virus                | Virus    | no  | no  | no  |
| thailand | streptococcus dysgalactiae            | Bacteria | no  | no  | no  |
| thailand | geobacillus stearothermophilus        | Bacteria | no  | no  | no  |
| thailand | cryptosporidium felis                 | Protozoa | no  | no  | no  |
| thailand | bartonella vinsonii                   | Bacteria | no  | no  | no  |
| thailand | human papillomavirus 32               | Virus    | no  | no  | no  |
| thailand | bacillus firmus                       | Bacteria | no  | no  | no  |
| thailand | norwalk virus                         | Virus    | yes | no  | yes |
| thailand | rickettsia rickettsii                 | Bacteria | yes | yes | no  |
| thailand | candida glabrata                      | Fungi    | yes | yes | yes |
| thailand | corynebacterium propinquum            | Bacteria | yes | no  | no  |
| thailand | human immunodeficiency virus 2        | Virus    | yes | no  | yes |
| thailand | rubella virus                         | Virus    | yes | no  | no  |
| thailand | bacillus mycoides                     | Bacteria | yes | no  | no  |
| thailand | cryptococcus gattii                   | Fungi    | no  | no  | no  |
| thailand | rickettsia typhi                      | Bacteria | yes | yes | no  |
| thailand | human papillomavirus 34               | Virus    | no  | no  | no  |
| thailand | human rhinovirus b                    | Virus    | yes | no  | no  |
| thailand | giardia intestinalis                  | Protozoa | no  | no  | no  |
| thailand | candida metapsilosis                  | Fungi    | no  | no  | no  |
| thailand | human adenovirus f                    | Virus    | yes | no  | no  |
| thailand | neisseria gonorrhoeae                 | Bacteria | yes | no  | yes |
| thailand | neosartorya glabra                    | Fungi    | no  | no  | no  |
| thailand | nocardiopsis dassonvillei             | Bacteria | no  | no  | no  |
| thailand | nosema ceranae                        | Fungi    | no  | no  | no  |
| thailand | taenia saginata                       | Helminth | yes | yes | no  |
| thailand | bacillus licheniformis                | Bacteria | yes | yes | no  |
| thailand | trichosporon asahii                   | Fungi    | yes | yes | no  |
| thailand | dengue virus                          | Virus    | no  | no  | no  |
| thailand | paecilomyces lilacinus                | Fungi    | yes | yes | no  |
| thailand | pediococcus pentosaceus               | Bacteria | no  | no  | no  |
| thailand | wellcomia siamensis                   | Helminth | no  | no  | no  |
| thailand | salmonella enterica                   | Bacteria | no  | no  | no  |

|          |                                        |          |     |     |     |
|----------|----------------------------------------|----------|-----|-----|-----|
| thailand | <i>lactobacillus salivarius</i>        | Bacteria | no  | no  | no  |
| thailand | <i>acinetobacter baumannii</i>         | Bacteria | yes | no  | no  |
| thailand | <i>enterobacter aerogenes</i>          | Bacteria | yes | yes | no  |
| thailand | <i>schistosoma spindale</i>            | Helminth | yes | yes | no  |
| thailand | <i>helicobacter pylori</i>             | Bacteria | yes | yes | no  |
| thailand | human immunodeficiency virus 1         | Virus    | yes | no  | yes |
| thailand | <i>cordyceps bassiana</i>              | Fungi    | no  | no  | no  |
| thailand | <i>vibrio parahaemolyticus</i>         | Bacteria | yes | yes | yes |
| thailand | rabies virus                           | Virus    | yes | yes | yes |
| thailand | sapporo virus                          | Virus    | no  | no  | no  |
| thailand | <i>babesia bigemina</i>                | Protozoa | no  | no  | no  |
| thailand | human rhinovirus a                     | Virus    | yes | no  | no  |
| thailand | <i>anaplasma platys</i>                | Bacteria | no  | no  | no  |
| thailand | <i>edwardsiella ictaluri</i>           | Bacteria | no  | no  | no  |
| thailand | <i>pseudomonas stutzeri</i>            | Bacteria | yes | no  | no  |
| thailand | hepatitis e virus                      | Virus    | yes | yes | yes |
| thailand | measles virus                          | Virus    | yes | yes | yes |
| thailand | <i>schizophyllum commune</i>           | Fungi    | yes | no  | no  |
| thailand | <i>streptococcus pyogenes</i>          | Bacteria | yes | yes | yes |
| thailand | human coronavirus 229e                 | Virus    | yes | no  | no  |
| thailand | foot-and-mouth disease virus           | Virus    | no  | no  | no  |
| thailand | <i>neisseria meningitidis</i>          | Bacteria | yes | no  | yes |
| thailand | porcine reproductive and respiratory s | Virus    | no  | no  | no  |
| thailand | human papillomavirus 6                 | Virus    | no  | no  | no  |
| thailand | influenza a virus                      | Virus    | yes | yes | yes |
| thailand | <i>trichuris trichiura</i>             | Helminth | yes | yes | no  |
| thailand | hepatitis c virus                      | Virus    | yes | no  | yes |
| thailand | <i>fasciola hepatica</i>               | Helminth | yes | yes | no  |
| thailand | kaeng khoi virus                       | Virus    | no  | no  | no  |
| thailand | rotavirus a                            | Virus    | yes | yes | yes |
| thailand | <i>enterocytozoon bienewisi</i>        | Fungi    | yes | no  | yes |
| thailand | <i>trichosporon mucoides</i>           | Fungi    | yes | yes | no  |
| thailand | <i>haplorchis pumilio</i>              | Helminth | no  | no  | no  |
| thailand | <i>brugia malayi</i>                   | Helminth | yes | yes | no  |
| thailand | <i>debaryomyces fabryi</i>             | Fungi    | no  | no  | no  |
| thailand | <i>bacillus thuringiensis</i>          | Bacteria | yes | no  | no  |
| thailand | <i>cladosporium cladosporioides</i>    | Fungi    | yes | no  | no  |
| thailand | <i>saccharomyces cerevisiae</i>        | Fungi    | yes | no  | no  |
| thailand | <i>lactobacillus plantarum</i>         | Bacteria | no  | no  | no  |
| thailand | <i>enterococcus faecium</i>            | Bacteria | yes | yes | yes |
| thailand | <i>campylobacter jejuni</i>            | Bacteria | yes | yes | yes |
| thailand | <i>cryptosporidium canis</i>           | Protozoa | no  | no  | no  |
| thailand | <i>trichinella spiralis</i>            | Helminth | yes | yes | yes |
| thailand | <i>xanthomonas campestris</i>          | Bacteria | no  | no  | no  |
| thailand | <i>burkholderia cenocepacia</i>        | Bacteria | no  | no  | no  |
| thailand | <i>bartonella elizabethae</i>          | Bacteria | yes | yes | no  |
| thailand | beak and feather disease virus         | Virus    | no  | no  | no  |
| thailand | <i>acinetobacter lwoffii</i>           | Bacteria | yes | no  | no  |
| thailand | <i>cryptococcus laurentii</i>          | Fungi    | no  | no  | no  |
| thailand | <i>bacillus cereus</i>                 | Bacteria | yes | yes | no  |

|          |                                         |          |     |     |     |
|----------|-----------------------------------------|----------|-----|-----|-----|
| thailand | gnathostoma spinigerum                  | Helminth | yes | yes | no  |
| thailand | ajellomyces capsulatus                  | Fungi    | no  | no  | no  |
| thailand | babesia bovis                           | Protozoa | yes | yes | no  |
| thailand | schistosoma incognitum                  | Helminth | no  | no  | no  |
| thailand | human papillomavirus 53                 | Virus    | no  | no  | no  |
| thailand | thailand virus                          | Virus    | no  | no  | no  |
| thailand | taenia solium                           | Helminth | yes | no  | yes |
| thailand | haplorchis yokogawai                    | Helminth | yes | yes | no  |
| thailand | streptococcus mutans                    | Bacteria | yes | no  | no  |
| thailand | pichia kudriavzevii                     | Fungi    | no  | no  | no  |
| thailand | chikungunya virus                       | Virus    | yes | yes | yes |
| thailand | human parvovirus b19                    | Virus    | no  | no  | no  |
| thailand | orientia tsutsugamushi                  | Bacteria | yes | yes | no  |
| thailand | escherichia coli                        | Bacteria | yes | yes | yes |
| thailand | chlamydia trachomatis                   | Bacteria | yes | yes | yes |
| thailand | staphylococcus gallinarum               | Bacteria | no  | no  | no  |
| thailand | bacillus aquimaris                      | Bacteria | no  | no  | no  |
| thailand | plasmodium ovale                        | Protozoa | yes | no  | no  |
| thailand | shigella sonnei                         | Bacteria | yes | yes | no  |
| thailand | pseudomonas aeruginosa                  | Bacteria | yes | yes | yes |
| thailand | haemophilus influenzae                  | Bacteria | yes | no  | yes |
| thailand | bacillus pumilus                        | Bacteria | yes | no  | no  |
| thailand | jc polyomavirus                         | Virus    | no  | no  | no  |
| thailand | aureobasidium pullulans                 | Fungi    | yes | no  | no  |
| thailand | bacillus clausii                        | Bacteria | no  | no  | no  |
| thailand | meyerozyma guilliermondii               | Fungi    | no  | no  | no  |
| thailand | human papillomavirus 61                 | Virus    | no  | no  | no  |
| thailand | human rhinovirus c                      | Virus    | no  | no  | no  |
| thailand | acinetobacter calcoaceticus             | Bacteria | yes | no  | no  |
| thailand | trypanosoma theileri                    | Protozoa | no  | no  | no  |
| thailand | bacillus flexus                         | Bacteria | no  | no  | no  |
| thailand | pneumocystis wakefieldiae               | Fungi    | no  | no  | no  |
| thailand | infectious spleen and kidney necrosis v | Virus    | no  | no  | no  |
| thailand | clavospora lusitaniae                   | Fungi    | no  | no  | no  |
| thailand | influenza b virus                       | Virus    | yes | yes | no  |
| thailand | human herpesvirus 4                     | Virus    | no  | no  | no  |
| thailand | wickerhamomyces anomalus                | Fungi    | no  | no  | no  |
| thailand | cryptococcus neoformans                 | Fungi    | yes | yes | yes |
| thailand | cryptosporidium parvum                  | Protozoa | yes | yes | yes |
| thailand | vibrio cholerae                         | Bacteria | yes | no  | yes |
| thailand | fasciola gigantica                      | Helminth | yes | yes | no  |
| thailand | providencia alcalifaciens               | Bacteria | yes | yes | no  |
| thailand | fusarium oxysporum                      | Fungi    | yes | no  | yes |
| togo     | onchocerca volvulus                     | Helminth | yes | yes | yes |
| togo     | hepatitis b virus                       | Virus    | yes | no  | yes |
| togo     | measles virus                           | Virus    | yes | yes | yes |
| togo     | staphylococcus aureus                   | Bacteria | yes | yes | yes |
| togo     | wuchereria bancrofti                    | Helminth | yes | no  | yes |
| togo     | polystomoides bourgati                  | Helminth | no  | no  | no  |
| togo     | human immunodeficiency virus 1          | Virus    | yes | no  | yes |

|                     |                                      |          |     |     |     |
|---------------------|--------------------------------------|----------|-----|-----|-----|
| togo                | <i>schistosoma mansoni</i>           | Helminth | yes | yes | yes |
| togo                | <i>necator americanus</i>            | Helminth | yes | yes | no  |
| togo                | <i>plasmodium falciparum</i>         | Protozoa | yes | no  | yes |
| togo                | <i>vibrio parahaemolyticus</i>       | Bacteria | yes | yes | yes |
| togo                | <i>schistosoma haematobium</i>       | Helminth | yes | yes | no  |
| togo                | human immunodeficiency virus 2       | Virus    | yes | no  | yes |
| togo                | <i>protopolystoma occidentalis</i>   | Helminth | no  | no  | no  |
| togo                | african swine fever virus            | Virus    | no  | no  | no  |
| togo                | <i>oesophagostomum bifurcum</i>      | Helminth | yes | yes | no  |
| togo                | <i>mycobacterium ulcerans</i>        | Bacteria | yes | yes | yes |
| tonga               | dengue virus                         | Virus    | no  | no  | no  |
| tonga               | jc polyomavirus                      | Virus    | no  | no  | no  |
| tonga               | hepatitis b virus                    | Virus    | yes | no  | yes |
| trinidad and tobago | <i>streptococcus agalactiae</i>      | Bacteria | yes | yes | no  |
| trinidad and tobago | <i>plasmodium vivax</i>              | Protozoa | yes | no  | yes |
| trinidad and tobago | <i>neisseria gonorrhoeae</i>         | Bacteria | yes | no  | yes |
| trinidad and tobago | <i>escherichia coli</i>              | Bacteria | yes | yes | yes |
| trinidad and tobago | <i>streptococcus pyogenes</i>        | Bacteria | yes | yes | yes |
| trinidad and tobago | <i>mansonella ozzardi</i>            | Helminth | yes | no  | no  |
| trinidad and tobago | human immunodeficiency virus 2       | Virus    | yes | no  | yes |
| trinidad and tobago | marituba virus                       | Virus    | yes | yes | no  |
| trinidad and tobago | <i>wuchereria bancrofti</i>          | Helminth | yes | no  | yes |
| trinidad and tobago | <i>pseudomonas aeruginosa</i>        | Bacteria | yes | yes | yes |
| trinidad and tobago | eastern equine encephalitis virus    | Virus    | yes | yes | yes |
| trinidad and tobago | <i>staphylococcus aureus</i>         | Bacteria | yes | yes | yes |
| trinidad and tobago | primate t-lymphotropic virus 1       | Virus    | no  | no  | no  |
| trinidad and tobago | yellow fever virus                   | Virus    | yes | yes | yes |
| trinidad and tobago | <i>brucella abortus</i>              | Bacteria | yes | yes | no  |
| trinidad and tobago | human immunodeficiency virus 1       | Virus    | yes | no  | yes |
| trinidad and tobago | <i>klebsiella pneumoniae</i>         | Bacteria | yes | yes | yes |
| trinidad and tobago | dengue virus                         | Virus    | no  | no  | no  |
| trinidad and tobago | <i>colletotrichum truncatum</i>      | Fungi    | no  | no  | no  |
| trinidad and tobago | <i>trypanosoma cruzi</i>             | Protozoa | yes | yes | yes |
| trinidad and tobago | <i>toxoplasma gondii</i>             | Protozoa | yes | yes | yes |
| trinidad and tobago | mayaro virus                         | Virus    | yes | yes | yes |
| trinidad and tobago | venezuelan equine encephalitis virus | Virus    | yes | yes | yes |
| trinidad and tobago | bluetongue virus                     | Virus    | no  | no  | no  |
| tunisia             | <i>penicillium polonicum</i>         | Fungi    | no  | no  | no  |
| tunisia             | <i>staphylococcus hominis</i>        | Bacteria | no  | no  | no  |
| tunisia             | <i>aspergillus flavus</i>            | Fungi    | no  | no  | no  |
| tunisia             | <i>staphylococcus epidermidis</i>    | Bacteria | yes | yes | yes |
| tunisia             | <i>borrelia garinii</i>              | Bacteria | no  | no  | no  |
| tunisia             | lymphocystis disease virus 1         | Virus    | no  | no  | no  |
| tunisia             | human immunodeficiency virus 1       | Virus    | yes | no  | yes |
| tunisia             | infectious bursal disease virus      | Virus    | no  | no  | no  |
| tunisia             | <i>leishmania major</i>              | Protozoa | yes | yes | no  |
| tunisia             | <i>serratia marcescens</i>           | Bacteria | yes | yes | yes |
| tunisia             | <i>legionella pneumophila</i>        | Bacteria | yes | no  | yes |
| tunisia             | bluetongue virus                     | Virus    | no  | no  | no  |
| tunisia             | hepatitis a virus                    | Virus    | yes | yes | yes |



|         |                               |          |     |     |     |
|---------|-------------------------------|----------|-----|-----|-----|
| tunisia | avian coronavirus             | Virus    | no  | no  | no  |
| tunisia | foot-and-mouth disease virus  | Virus    | no  | no  | no  |
| tunisia | pseudomonas putida            | Bacteria | yes | no  | no  |
| tunisia | trichophyton violaceum        | Fungi    | yes | yes | no  |
| tunisia | leishmania tropica            | Protozoa | yes | yes | no  |
| tunisia | human enterovirus c           | Virus    | yes | no  | no  |
| tunisia | bacillus subtilis             | Bacteria | yes | yes | no  |
| tunisia | enterococcus faecalis         | Bacteria | yes | yes | yes |
| tunisia | theileria annulata            | Protozoa | no  | no  | no  |
| tunisia | aspergillus niger             | Fungi    | yes | yes | no  |
| tunisia | candida albicans              | Fungi    | yes | yes | yes |
| tunisia | echinococcus granulosus       | Helminth | yes | yes | yes |
| tunisia | anaplasma phagocytophilum     | Bacteria | no  | no  | no  |
| tunisia | oropouche virus               | Virus    | yes | yes | yes |
| tunisia | bacillus licheniformis        | Bacteria | yes | yes | no  |
| tunisia | sinorhizobium medicae         | Bacteria | no  | no  | no  |
| tunisia | bovine viral diarrhea virus 1 | Virus    | no  | no  | no  |
| tunisia | pseudomonas aeruginosa        | Bacteria | yes | yes | yes |
| tunisia | agrobacterium tumefaciens     | Bacteria | no  | no  | no  |
| tunisia | human enterovirus b           | Virus    | yes | no  | yes |
| tunisia | bacillus pumilus              | Bacteria | yes | no  | no  |
| tunisia | stenotrophomonas maltophilia  | Bacteria | no  | no  | no  |
| tunisia | giardia intestinalis          | Protozoa | no  | no  | no  |
| tunisia | chlamydomyxa abortus          | Bacteria | no  | no  | no  |
| tunisia | klebsiella pneumoniae         | Bacteria | yes | yes | yes |
| tunisia | ligula intestinalis           | Helminth | yes | yes | no  |
| tunisia | borrelia lusitaniae           | Bacteria | no  | no  | no  |
| tunisia | hysterothylacium aduncum      | Helminth | no  | no  | no  |
| tunisia | anoxybacillus pushchinoensis  | Bacteria | no  | no  | no  |
| tunisia | sandfly fever naples virus    | Virus    | yes | yes | yes |
| tunisia | bacillus thuringiensis        | Bacteria | yes | no  | no  |
| tunisia | acinetobacter baumannii       | Bacteria | yes | no  | no  |
| tunisia | leishmania infantum           | Protozoa | yes | yes | yes |
| tunisia | bacillus cereus               | Bacteria | yes | yes | no  |
| tunisia | calicotyle palombi            | Helminth | no  | no  | no  |
| tunisia | enterococcus faecium          | Bacteria | yes | yes | yes |
| tunisia | proteus mirabilis             | Bacteria | yes | yes | no  |
| tunisia | salmonella enterica           | Bacteria | no  | no  | no  |
| tunisia | fasciola hepatica             | Helminth | yes | yes | no  |
| tunisia | aichi virus                   | Virus    | no  | no  | no  |
| tunisia | enterocytozoon bienewisi      | Fungi    | yes | no  | yes |
| tunisia | human adenovirus f            | Virus    | yes | no  | no  |
| tunisia | bacillus amyloliquefaciens    | Bacteria | no  | no  | no  |
| tunisia | influenza a virus             | Virus    | yes | yes | yes |
| tunisia | staphylococcus simulans       | Bacteria | no  | no  | no  |
| tunisia | measles virus                 | Virus    | yes | yes | yes |
| tunisia | staphylococcus aureus         | Bacteria | yes | yes | yes |
| tunisia | escherichia coli              | Bacteria | yes | yes | yes |
| tunisia | hepatitis c virus             | Virus    | yes | no  | yes |
| turkey  | bacillus amyloliquefaciens    | Bacteria | no  | no  | no  |

|        |                                    |          |     |     |     |
|--------|------------------------------------|----------|-----|-----|-----|
| turkey | brucella abortus                   | Bacteria | yes | yes | no  |
| turkey | hepatitis a virus                  | Virus    | yes | yes | yes |
| turkey | fusarium solani                    | Fungi    | yes | yes | yes |
| turkey | foot-and-mouth disease virus       | Virus    | no  | no  | no  |
| turkey | entamoeba coli                     | Protozoa | no  | no  | no  |
| turkey | borrelia afzelii                   | Bacteria | no  | no  | no  |
| turkey | cordyceps bassiana                 | Fungi    | no  | no  | no  |
| turkey | aliivibrio logei                   | Bacteria | no  | no  | no  |
| turkey | bacillus subtilis                  | Bacteria | yes | yes | no  |
| turkey | herminiimonas saxobsidens          | Bacteria | no  | no  | no  |
| turkey | lactobacillus brevis               | Bacteria | no  | no  | no  |
| turkey | ehrlichia canis                    | Bacteria | no  | no  | no  |
| turkey | candida albicans                   | Fungi    | yes | yes | yes |
| turkey | onchocerca lupi                    | Helminth | no  | no  | no  |
| turkey | border disease virus               | Virus    | no  | no  | no  |
| turkey | bovine viral diarrhea virus 1      | Virus    | no  | no  | no  |
| turkey | vibrio crassostreae                | Bacteria | no  | no  | no  |
| turkey | human immunodeficiency virus 1     | Virus    | yes | no  | yes |
| turkey | aeromonas salmonicida              | Bacteria | no  | no  | no  |
| turkey | hepatitis c virus                  | Virus    | yes | no  | yes |
| turkey | eimeria acervulina                 | Protozoa | no  | no  | no  |
| turkey | trichosporon coremiiforme          | Fungi    | no  | no  | no  |
| turkey | taenia multiceps                   | Helminth | yes | no  | no  |
| turkey | hepatozoon canis                   | Protozoa | no  | no  | no  |
| turkey | human enterovirus a                | Virus    | yes | no  | no  |
| turkey | equid herpesvirus 2                | Virus    | no  | no  | no  |
| turkey | human adenovirus b                 | Virus    | yes | no  | no  |
| turkey | rubella virus                      | Virus    | yes | no  | no  |
| turkey | enterococcus faecium               | Bacteria | yes | yes | yes |
| turkey | newcastle disease virus            | Virus    | yes | yes | no  |
| turkey | leuconostoc mesenteroides          | Bacteria | no  | no  | no  |
| turkey | viral hemorrhagic septicemia virus | Virus    | no  | no  | no  |
| turkey | equid herpesvirus 1                | Virus    | no  | no  | no  |
| turkey | staphylococcus intermedius         | Bacteria | yes | yes | no  |
| turkey | toxoplasma gondii                  | Protozoa | yes | yes | yes |
| turkey | borrelia burgdorferi               | Bacteria | yes | yes | yes |
| turkey | echinococcus granulosus            | Helminth | yes | yes | yes |
| turkey | anoplocephaloides dentata          | Helminth | no  | no  | no  |
| turkey | influenza a virus                  | Virus    | yes | yes | yes |
| turkey | pediococcus acidilactici           | Bacteria | no  | no  | no  |
| turkey | escherichia coli                   | Bacteria | yes | yes | yes |
| turkey | babesia ovis                       | Protozoa | no  | no  | no  |
| turkey | babesia gibsoni                    | Protozoa | yes | yes | no  |
| turkey | measles virus                      | Virus    | yes | yes | yes |
| turkey | human respiratory syncytial virus  | Virus    | yes | no  | no  |
| turkey | lactococcus lactis                 | Bacteria | no  | no  | no  |
| turkey | aliivibrio fischeri                | Bacteria | no  | no  | no  |
| turkey | anguillicoloides crassus           | Helminth | no  | no  | no  |
| turkey | klebsiella pneumoniae              | Bacteria | yes | yes | yes |
| turkey | bacillus thuringiensis             | Bacteria | yes | no  | no  |

|        |                                      |          |     |     |     |
|--------|--------------------------------------|----------|-----|-----|-----|
| turkey | cryptosporidium ryanae               | Protozoa | no  | no  | no  |
| turkey | bacillus licheniformis               | Bacteria | yes | yes | no  |
| turkey | anaplasma phagocytophilum            | Bacteria | no  | no  | no  |
| turkey | plasmodium vivax                     | Protozoa | yes | no  | yes |
| turkey | anoxybacillus pushchinoensis         | Bacteria | no  | no  | no  |
| turkey | leptospira interrogans               | Bacteria | yes | yes | yes |
| turkey | mycobacterium tuberculosis           | Bacteria | yes | yes | yes |
| turkey | enterobius vermicularis              | Helminth | yes | yes | no  |
| turkey | bacillus pumilus                     | Bacteria | yes | no  | no  |
| turkey | babesia bigemina                     | Protozoa | no  | no  | no  |
| turkey | bk polyomavirus                      | Virus    | no  | no  | no  |
| turkey | theileria orientalis                 | Protozoa | no  | no  | no  |
| turkey | mycoplasma capricolum                | Bacteria | no  | no  | no  |
| turkey | eimeria mitis                        | Protozoa | no  | no  | no  |
| turkey | bovine herpesvirus 4                 | Virus    | no  | no  | no  |
| turkey | brugia pahangi                       | Helminth | yes | yes | no  |
| turkey | clavospora lusitaniae                | Fungi    | no  | no  | no  |
| turkey | vibrio harveyi                       | Bacteria | no  | no  | no  |
| turkey | borrelia lusitaniae                  | Bacteria | no  | no  | no  |
| turkey | human adenovirus e                   | Virus    | yes | no  | no  |
| turkey | anaplasma ovis                       | Bacteria | no  | no  | no  |
| turkey | ascaris lumbricoides                 | Helminth | yes | yes | no  |
| turkey | cryptosporidium parvum               | Protozoa | yes | yes | yes |
| turkey | bovine viral diarrhea virus 2        | Virus    | no  | no  | no  |
| turkey | human enterovirus b                  | Virus    | yes | no  | yes |
| turkey | babesia bovis                        | Protozoa | yes | yes | no  |
| turkey | eimeria maxima                       | Protozoa | no  | no  | no  |
| turkey | giardia intestinalis                 | Protozoa | no  | no  | no  |
| turkey | equid herpesvirus 4                  | Virus    | no  | no  | no  |
| turkey | helicobacter pylori                  | Bacteria | yes | yes | no  |
| turkey | lewia infectoria                     | Fungi    | no  | no  | no  |
| turkey | streptococcus pneumoniae             | Bacteria | yes | yes | yes |
| turkey | theileria annulata                   | Protozoa | no  | no  | no  |
| turkey | acinetobacter baumannii              | Bacteria | yes | no  | no  |
| turkey | burkholderia mallei                  | Bacteria | yes | yes | no  |
| turkey | pseudomonas aeruginosa               | Bacteria | yes | yes | yes |
| turkey | staphylococcus delphini              | Bacteria | no  | no  | no  |
| turkey | fasciola gigantica                   | Helminth | yes | yes | no  |
| turkey | eimeria brunetti                     | Protozoa | no  | no  | no  |
| turkey | leishmania infantum                  | Protozoa | yes | yes | yes |
| turkey | caprine arthritis encephalitis virus | Virus    | no  | no  | no  |
| turkey | geobacillus stearothermophilus       | Bacteria | no  | no  | no  |
| turkey | leishmania tropica                   | Protozoa | yes | yes | no  |
| turkey | lactobacillus plantarum              | Bacteria | no  | no  | no  |
| turkey | equid herpesvirus 5                  | Virus    | no  | no  | no  |
| turkey | avian leukosis virus                 | Virus    | no  | no  | no  |
| turkey | mycoplasma bovigenitalium            | Bacteria | no  | no  | no  |
| turkey | salmonella enterica                  | Bacteria | no  | no  | no  |
| turkey | bovine leukemia virus                | Virus    | no  | no  | no  |
| turkey | rotavirus c                          | Virus    | yes | yes | yes |

|                      |                                      |          |     |     |     |
|----------------------|--------------------------------------|----------|-----|-----|-----|
| turkey               | trichuris trichiura                  | Helminth | yes | yes | no  |
| turkey               | rhodotorula mucilaginosa             | Fungi    | yes | yes | no  |
| turkey               | serratia marcescens                  | Bacteria | yes | yes | yes |
| turkey               | crimean-congo hemorrhagic fever viru | Virus    | no  | no  | no  |
| turkey               | shigella sonnei                      | Bacteria | yes | yes | no  |
| turkey               | photobacterium kishitanii            | Bacteria | no  | no  | no  |
| turkey               | staphylococcus haemolyticus          | Bacteria | yes | yes | no  |
| turkey               | vaccinia virus                       | Virus    | no  | no  | no  |
| turkey               | fasciola hepatica                    | Helminth | yes | yes | no  |
| turkey               | vibrio gigantis                      | Bacteria | no  | no  | no  |
| turkey               | eimeria praecox                      | Protozoa | no  | no  | no  |
| turkey               | ovine herpesvirus 2                  | Virus    | no  | no  | no  |
| turkey               | theileria ovis                       | Protozoa | no  | no  | no  |
| turkey               | anisakis simplex                     | Helminth | yes | yes | yes |
| turkey               | hepatitis b virus                    | Virus    | yes | no  | yes |
| turkey               | haemophilus influenzae               | Bacteria | yes | no  | yes |
| turkey               | dirofilaria immitis                  | Helminth | yes | yes | no  |
| turkey               | bluetongue virus                     | Virus    | no  | no  | no  |
| turkey               | ligula intestinalis                  | Helminth | yes | yes | no  |
| turkey               | borrelia valaisiana                  | Bacteria | no  | no  | no  |
| turkey               | peste-des-petits-ruminants virus     | Virus    | no  | no  | no  |
| turkey               | staphylococcus epidermidis           | Bacteria | yes | yes | yes |
| turkey               | shewanella woodyi                    | Bacteria | no  | no  | no  |
| turkey               | human enterovirus c                  | Virus    | yes | no  | no  |
| turkey               | borrelia garinii                     | Bacteria | no  | no  | no  |
| turkey               | lactobacillus salivarius             | Bacteria | no  | no  | no  |
| turkey               | staphylococcus aureus                | Bacteria | yes | yes | yes |
| turkey               | heligmosomoides polygyrus            | Helminth | no  | no  | no  |
| turkey               | hepatitis delta virus                | Virus    | yes | no  | no  |
| turkey               | jc polyomavirus                      | Virus    | no  | no  | no  |
| turkey               | chilomastix mesnili                  | Protozoa | no  | no  | no  |
| turkey               | human adenovirus d                   | Virus    | yes | no  | no  |
| turkey               | eimeria tenella                      | Protozoa | no  | no  | no  |
| turkey               | rabies virus                         | Virus    | yes | yes | yes |
| turkey               | borrelia turcica                     | Bacteria | no  | no  | no  |
| turkey               | rotavirus a                          | Virus    | yes | yes | yes |
| turkey               | wickerhamomyces anomalus             | Fungi    | no  | no  | no  |
| turkey               | babesia major                        | Protozoa | no  | no  | no  |
| turkey               | hymenolepis nana                     | Helminth | yes | yes | no  |
| turkmenistan         | leishmania major                     | Protozoa | yes | yes | no  |
| turkmenistan         | hepatitis b virus                    | Virus    | yes | no  | yes |
| turkmenistan         | human enterovirus c                  | Virus    | yes | no  | no  |
| turkmenistan         | crimean-congo hemorrhagic fever viru | Virus    | no  | no  | no  |
| turkmenistan         | leishmania turanica                  | Protozoa | no  | no  | no  |
| turkmenistan         | influenza a virus                    | Virus    | yes | yes | yes |
| turks and caicos isl | cryptosporidium hominis              | Protozoa | yes | no  | yes |
| u.s. virgin islands  | haemonchus contortus                 | Helminth | yes | yes | no  |
| u.s. virgin islands  | babesia bigemina                     | Protozoa | no  | no  | no  |
| uganda               | plasmodium billcollinsi              | Protozoa | no  | no  | no  |
| uganda               | sudan ebolavirus                     | Virus    | no  | no  | no  |

|        |                                       |          |     |     |     |
|--------|---------------------------------------|----------|-----|-----|-----|
| uganda | measles virus                         | Virus    | yes | yes | yes |
| uganda | ajellomyces capsulatus                | Fungi    | no  | no  | no  |
| uganda | toxoplasma gondii                     | Protozoa | yes | yes | yes |
| uganda | rabies virus                          | Virus    | yes | yes | yes |
| uganda | cryptococcus neoformans               | Fungi    | yes | yes | yes |
| uganda | echinococcus felidis                  | Helminth | no  | no  | no  |
| uganda | schistosoma bovis                     | Helminth | yes | yes | no  |
| uganda | mycobacterium bovis                   | Bacteria | yes | yes | yes |
| uganda | streptococcus mutans                  | Bacteria | yes | no  | no  |
| uganda | pneumocystis jirovecii                | Fungi    | no  | no  | no  |
| uganda | streptococcus pneumoniae              | Bacteria | yes | yes | yes |
| uganda | cryptosporidium meleagridis           | Protozoa | no  | no  | no  |
| uganda | neisseria gonorrhoeae                 | Bacteria | yes | no  | yes |
| uganda | trichomonas vaginalis                 | Protozoa | yes | no  | yes |
| uganda | plasmodium billbrayi                  | Protozoa | no  | no  | no  |
| uganda | plasmodium vivax                      | Protozoa | yes | no  | yes |
| uganda | enterocytozoon bienewisi              | Fungi    | yes | no  | yes |
| uganda | aspergillus ochraceus                 | Fungi    | no  | no  | no  |
| uganda | klebsiella pneumoniae                 | Bacteria | yes | yes | yes |
| uganda | plasmodium malariae                   | Protozoa | yes | yes | no  |
| uganda | rift valley fever virus               | Virus    | yes | yes | yes |
| uganda | leuconostoc mesenteroides             | Bacteria | no  | no  | no  |
| uganda | mycobacterium tuberculosis            | Bacteria | yes | yes | yes |
| uganda | chlamydia trachomatis                 | Bacteria | yes | yes | yes |
| uganda | xanthomonas campestris                | Bacteria | no  | no  | no  |
| uganda | hepatitis c virus                     | Virus    | yes | no  | yes |
| uganda | tick-borne encephalitis virus         | Virus    | no  | no  | no  |
| uganda | semliki forest virus                  | Virus    | yes | yes | no  |
| uganda | cryptosporidium hominis               | Protozoa | yes | no  | yes |
| uganda | zika virus                            | Virus    | yes | yes | yes |
| uganda | dengue virus                          | Virus    | no  | no  | no  |
| uganda | chaetomium globosum                   | Fungi    | yes | no  | no  |
| uganda | human herpesvirus 2                   | Virus    | no  | no  | no  |
| uganda | lactococcus lactis                    | Bacteria | no  | no  | no  |
| uganda | protopolystoma simplicis              | Helminth | no  | no  | no  |
| uganda | streptococcus sobrinus                | Bacteria | yes | no  | no  |
| uganda | crimean-congo hemorrhagic fever virus | Virus    | no  | no  | no  |
| uganda | escherichia coli                      | Bacteria | yes | yes | yes |
| uganda | botryosphaeria rhodina                | Fungi    | no  | no  | no  |
| uganda | plasmodium falciparum                 | Protozoa | yes | no  | yes |
| uganda | cryptosporidium parvum                | Protozoa | yes | yes | yes |
| uganda | trypanosoma brucei                    | Protozoa | yes | yes | yes |
| uganda | enterococcus hirae                    | Bacteria | yes | yes | no  |
| uganda | foot-and-mouth disease virus          | Virus    | no  | no  | no  |
| uganda | hepatitis b virus                     | Virus    | yes | no  | yes |
| uganda | talaromyces eburneus                  | Fungi    | no  | no  | no  |
| uganda | enterococcus faecalis                 | Bacteria | yes | yes | yes |
| uganda | yellow fever virus                    | Virus    | yes | yes | yes |
| uganda | peste-des-petits-ruminants virus      | Virus    | no  | no  | no  |
| uganda | west Nile virus                       | Virus    | yes | yes | yes |

|         |                                 |          |     |     |     |
|---------|---------------------------------|----------|-----|-----|-----|
| uganda  | lake victoria marburgvirus      | Virus    | no  | no  | no  |
| uganda  | trichuris trichiura             | Helminth | yes | yes | no  |
| uganda  | cladosporium cladosporioides    | Fungi    | yes | no  | no  |
| uganda  | human immunodeficiency virus 2  | Virus    | yes | no  | yes |
| uganda  | enterococcus faecium            | Bacteria | yes | yes | yes |
| uganda  | human immunodeficiency virus 1  | Virus    | yes | no  | yes |
| uganda  | influenza a virus               | Virus    | yes | yes | yes |
| uganda  | lactobacillus plantarum         | Bacteria | no  | no  | no  |
| uganda  | african swine fever virus       | Virus    | no  | no  | no  |
| uganda  | human herpesvirus 6             | Virus    | yes | no  | no  |
| uganda  | schistosoma mansoni             | Helminth | yes | yes | yes |
| uganda  | lactobacillus paracasei         | Bacteria | no  | no  | no  |
| uganda  | rubella virus                   | Virus    | yes | no  | no  |
| uganda  | onchocerca volvulus             | Helminth | yes | yes | yes |
| uganda  | human herpesvirus 8             | Virus    | yes | no  | yes |
| uganda  | lactobacillus casei             | Bacteria | no  | no  | no  |
| uganda  | feline immunodeficiency virus   | Virus    | no  | no  | no  |
| uganda  | protopolystoma xenopodis        | Helminth | no  | no  | no  |
| uganda  | trypanosoma vivax               | Protozoa | no  | no  | no  |
| uganda  | plasmodium reichenowi           | Protozoa | no  | no  | no  |
| ukraine | haematoloechus abbreviatus      | Helminth | no  | no  | no  |
| ukraine | pseudallescheria boydii         | Fungi    | no  | no  | no  |
| ukraine | bunyamwera virus                | Virus    | yes | yes | no  |
| ukraine | hepatitis a virus               | Virus    | yes | yes | yes |
| ukraine | brachycoelium salamandrae       | Helminth | no  | no  | no  |
| ukraine | alaria alata                    | Helminth | no  | no  | no  |
| ukraine | tick-borne encephalitis virus   | Virus    | no  | no  | no  |
| ukraine | haematoloechus asper            | Helminth | no  | no  | no  |
| ukraine | bacillus subtilis               | Bacteria | yes | yes | no  |
| ukraine | cardiocephaloides longicollis   | Helminth | no  | no  | no  |
| ukraine | allassogonoporus amphoraeformis | Helminth | no  | no  | no  |
| ukraine | influenza a virus               | Virus    | yes | yes | yes |
| ukraine | brandesia turgida               | Helminth | no  | no  | no  |
| ukraine | bacillus thuringiensis          | Bacteria | yes | no  | no  |
| ukraine | avian coronavirus               | Virus    | no  | no  | no  |
| ukraine | prosotocus confusus             | Helminth | no  | no  | no  |
| ukraine | tetrabothrius erostris          | Helminth | no  | no  | no  |
| ukraine | human enterovirus b             | Virus    | yes | no  | yes |
| ukraine | neoglyphe sobolevi              | Helminth | no  | no  | no  |
| ukraine | plasmodium relictum             | Protozoa | no  | no  | no  |
| ukraine | prosthogonimus ovatus           | Helminth | no  | no  | no  |
| ukraine | borrelia valaisiana             | Bacteria | no  | no  | no  |
| ukraine | plagiorchis koreanus            | Helminth | no  | no  | no  |
| ukraine | pleurogenoides medians          | Helminth | no  | no  | no  |
| ukraine | pleurogenes claviger            | Helminth | no  | no  | no  |
| ukraine | urogonimus macrostomus          | Helminth | no  | no  | no  |
| ukraine | newcastle disease virus         | Virus    | yes | yes | no  |
| ukraine | lecithodendrium linstowi        | Helminth | no  | no  | no  |
| ukraine | acinetobacter junii             | Bacteria | yes | no  | no  |
| ukraine | bacillus amyloliquefaciens      | Bacteria | no  | no  | no  |

|                     |                                        |          |     |     |     |
|---------------------|----------------------------------------|----------|-----|-----|-----|
| ukraine             | human immunodeficiency virus 1         | Virus    | yes | no  | yes |
| ukraine             | plagiorchis vespertilionis             | Helminth | no  | no  | no  |
| ukraine             | schistogonimus rarus                   | Helminth | no  | no  | no  |
| ukraine             | prosthogonimus cuneatus                | Helminth | no  | no  | no  |
| ukraine             | psilochasmus oxyurus                   | Helminth | no  | no  | no  |
| ukraine             | rubenstrema opisthovitellinum          | Helminth | no  | no  | no  |
| ukraine             | bovine leukemia virus                  | Virus    | no  | no  | no  |
| ukraine             | rubenstrema exasperatum                | Helminth | no  | no  | no  |
| ukraine             | spirhapalum polesianum                 | Helminth | no  | no  | no  |
| ukraine             | measles virus                          | Virus    | yes | yes | yes |
| ukraine             | prosthodendrium longiforme             | Helminth | no  | no  | no  |
| ukraine             | ophiosacculus mehelyi                  | Helminth | no  | no  | no  |
| ukraine             | borrelia afzelii                       | Bacteria | no  | no  | no  |
| ukraine             | human immunodeficiency virus 2         | Virus    | yes | no  | yes |
| ukraine             | opisthioglyphe ranae                   | Helminth | no  | no  | no  |
| ukraine             | parabascus joannae                     | Helminth | no  | no  | no  |
| ukraine             | telorchis assula                       | Helminth | no  | no  | no  |
| ukraine             | parabascus duboisi                     | Helminth | no  | no  | no  |
| ukraine             | avian metapneumovirus                  | Virus    | no  | no  | no  |
| ukraine             | pseudomonas putida                     | Bacteria | yes | no  | no  |
| ukraine             | galactosomum lacteum                   | Helminth | no  | no  | no  |
| ukraine             | spring viraemia of carp virus          | Virus    | no  | no  | no  |
| ukraine             | euparyphium melis                      | Helminth | no  | no  | no  |
| ukraine             | neoglyphe locellus                     | Helminth | no  | no  | no  |
| ukraine             | apharyngostrigea cornu                 | Helminth | no  | no  | no  |
| ukraine             | bilharziella polonica                  | Helminth | yes | yes | no  |
| ukraine             | acinetobacter lwoffii                  | Bacteria | yes | no  | no  |
| ukraine             | plagiorchis maculosus                  | Helminth | no  | no  | no  |
| ukraine             | rabies virus                           | Virus    | yes | yes | yes |
| ukraine             | rhizomucor pusillus                    | Fungi    | yes | yes | no  |
| ukraine             | skrjabinoeces similis                  | Helminth | no  | no  | no  |
| ukraine             | porcine reproductive and respiratory s | Virus    | no  | no  | no  |
| ukraine             | haematoloechus variegatus              | Helminth | no  | no  | no  |
| ukraine             | rhabdias sphaerocephala                | Helminth | no  | no  | no  |
| ukraine             | tanaisia fedtschenkoii                 | Helminth | no  | no  | no  |
| ukraine             | candidotrema loossi                    | Helminth | no  | no  | no  |
| united arab emirati | hepatitis b virus                      | Virus    | yes | no  | yes |
| united arab emirati | camel pox virus                        | Virus    | no  | no  | no  |
| united arab emirati | peste-des-petits-ruminants virus       | Virus    | no  | no  | no  |
| united arab emirati | equine rhinitis a virus                | Virus    | no  | no  | no  |
| united arab emirati | brucella melitensis                    | Bacteria | yes | yes | yes |
| united arab emirati | rhinocladiella mackenziei              | Fungi    | no  | no  | no  |
| united arab emirati | orientia tsutsugamushi                 | Bacteria | yes | yes | no  |
| united arab emirati | newcastle disease virus                | Virus    | yes | yes | no  |
| united arab emirati | influenza a virus                      | Virus    | yes | yes | yes |
| united arab emirati | foot-and-mouth disease virus           | Virus    | no  | no  | no  |
| united arab emirati | orf virus                              | Virus    | yes | yes | no  |
| united arab emirati | enterocytozoon bienersi                | Fungi    | yes | no  | yes |
| united kingdom      | bovine papillomavirus 1                | Virus    | no  | no  | no  |
| united kingdom      | hepatitis c virus                      | Virus    | yes | no  | yes |

|                |                                    |          |     |     |     |
|----------------|------------------------------------|----------|-----|-----|-----|
| united kingdom | <i>rhodococcus equi</i>            | Bacteria | yes | yes | no  |
| united kingdom | <i>orymatobothrium musteli</i>     | Helminth | no  | no  | no  |
| united kingdom | <i>cochliobolus spicifer</i>       | Fungi    | no  | no  | no  |
| united kingdom | <i>klebsiella oxytoca</i>          | Bacteria | yes | yes | no  |
| united kingdom | bovine viral diarrhea virus 1      | Virus    | no  | no  | no  |
| united kingdom | <i>babesia canis</i>               | Protozoa | no  | no  | no  |
| united kingdom | <i>campylobacter jejuni</i>        | Bacteria | yes | yes | yes |
| united kingdom | <i>neisseria gonorrhoeae</i>       | Bacteria | yes | no  | yes |
| united kingdom | <i>echinostoma revolutum</i>       | Helminth | yes | yes | no  |
| united kingdom | <i>nematodirus filicollis</i>      | Helminth | no  | no  | no  |
| united kingdom | human enterovirus a                | Virus    | yes | no  | no  |
| united kingdom | <i>ancylocoelium typicum</i>       | Helminth | no  | no  | no  |
| united kingdom | <i>achromobacter xylosoxidans</i>  | Bacteria | yes | no  | no  |
| united kingdom | avian metapneumovirus              | Virus    | no  | no  | no  |
| united kingdom | <i>trypanosoma brucei</i>          | Protozoa | yes | yes | yes |
| united kingdom | <i>enterococcus faecium</i>        | Bacteria | yes | yes | yes |
| united kingdom | mumps virus                        | Virus    | yes | no  | no  |
| united kingdom | <i>pleistophora typicalis</i>      | Fungi    | no  | no  | no  |
| united kingdom | <i>mycoplasma salivarium</i>       | Bacteria | yes | no  | no  |
| united kingdom | <i>eubothrium crassum</i>          | Helminth | no  | no  | no  |
| united kingdom | <i>diplostomum phoxini</i>         | Helminth | no  | no  | no  |
| united kingdom | <i>malassezia sympodialis</i>      | Fungi    | yes | yes | no  |
| united kingdom | seoul virus                        | Virus    | yes | yes | yes |
| united kingdom | <i>giardia intestinalis</i>        | Protozoa | no  | no  | no  |
| united kingdom | <i>granulicatella adiacens</i>     | Bacteria | no  | no  | no  |
| united kingdom | <i>corynebacterium striatum</i>    | Bacteria | yes | no  | no  |
| united kingdom | <i>ajellomyces capsulatus</i>      | Fungi    | no  | no  | no  |
| united kingdom | <i>enterobacter asburiae</i>       | Bacteria | yes | yes | no  |
| united kingdom | <i>entamoeba histolytica</i>       | Protozoa | yes | yes | no  |
| united kingdom | <i>agrobacterium tumefaciens</i>   | Bacteria | no  | no  | no  |
| united kingdom | <i>encephalitozoon cuniculi</i>    | Fungi    | yes | yes | yes |
| united kingdom | <i>aeromonas salmonicida</i>       | Bacteria | no  | no  | no  |
| united kingdom | avian coronavirus                  | Virus    | no  | no  | no  |
| united kingdom | <i>peracreadium idoneum</i>        | Helminth | no  | no  | no  |
| united kingdom | <i>otodistomum cestoides</i>       | Helminth | no  | no  | no  |
| united kingdom | <i>mycobacterium bovis</i>         | Bacteria | yes | yes | yes |
| united kingdom | <i>saccharomyces cerevisiae</i>    | Fungi    | yes | no  | no  |
| united kingdom | <i>mycobacterium avium</i>         | Bacteria | yes | yes | yes |
| united kingdom | <i>lactobacillus crispatus</i>     | Bacteria | no  | no  | no  |
| united kingdom | canid herpesvirus 1                | Virus    | no  | no  | no  |
| united kingdom | <i>variovorax paradoxus</i>        | Bacteria | no  | no  | no  |
| united kingdom | human herpesvirus 1                | Virus    | no  | no  | no  |
| united kingdom | <i>rothia mucilaginosa</i>         | Bacteria | no  | no  | no  |
| united kingdom | <i>sphingomonas melonis</i>        | Bacteria | no  | no  | no  |
| united kingdom | <i>vibrio cholerae</i>             | Bacteria | yes | no  | yes |
| united kingdom | <i>streptococcus gordonii</i>      | Bacteria | yes | no  | no  |
| united kingdom | <i>mycoplasma synoviae</i>         | Bacteria | no  | no  | no  |
| united kingdom | <i>trichophyton tonsurans</i>      | Fungi    | yes | yes | no  |
| united kingdom | <i>avibacterium endocarditidis</i> | Bacteria | no  | no  | no  |
| united kingdom | <i>khawia sinensis</i>             | Helminth | no  | no  | no  |



|                |                                    |          |     |     |     |
|----------------|------------------------------------|----------|-----|-----|-----|
| united kingdom | entamoeba hartmanni                | Protozoa | no  | no  | no  |
| united kingdom | scrapie agent                      | Others   | no  | no  | no  |
| united kingdom | schizophyllum commune              | Fungi    | yes | no  | no  |
| united kingdom | spring viraemia of carp virus      | Virus    | no  | no  | no  |
| united kingdom | plasmodium vivax                   | Protozoa | yes | no  | yes |
| united kingdom | bovine adenovirus c                | Virus    | no  | no  | no  |
| united kingdom | prevotella buccae                  | Bacteria | yes | no  | no  |
| united kingdom | bacillus mycooides                 | Bacteria | yes | no  | no  |
| united kingdom | moraxella osloensis                | Bacteria | yes | no  | no  |
| united kingdom | trichuris ovis                     | Helminth | no  | no  | no  |
| united kingdom | acinetobacter lwoffii              | Bacteria | yes | no  | no  |
| united kingdom | taenia multiceps                   | Helminth | yes | no  | no  |
| united kingdom | cordyceps bassiana                 | Fungi    | no  | no  | no  |
| united kingdom | leishmania donovani                | Protozoa | yes | yes | yes |
| united kingdom | viral hemorrhagic septicemia virus | Virus    | no  | no  | no  |
| united kingdom | bacillus anthracis                 | Bacteria | yes | yes | yes |
| united kingdom | equid herpesvirus 1                | Virus    | no  | no  | no  |
| united kingdom | cyclocoelum mutabile               | Helminth | no  | no  | no  |
| united kingdom | sphaerothecum destruens            | Others   | no  | no  | no  |
| united kingdom | accacoelium contortum              | Helminth | no  | no  | no  |
| united kingdom | staphylococcus aureus              | Bacteria | yes | yes | yes |
| united kingdom | cryptosporidium baileyi            | Protozoa | no  | no  | no  |
| united kingdom | hafnia alvei                       | Bacteria | yes | yes | no  |
| united kingdom | butyrivibrio fibrisolvens          | Bacteria | no  | no  | no  |
| united kingdom | prevotella melaninogenica          | Bacteria | yes | yes | no  |
| united kingdom | human papillomavirus 53            | Virus    | no  | no  | no  |
| united kingdom | babesia microti                    | Protozoa | yes | yes | yes |
| united kingdom | hepatitis delta virus              | Virus    | yes | no  | no  |
| united kingdom | dictyocaulus filaria               | Helminth | no  | no  | no  |
| united kingdom | enterocytozoon bienewisi           | Fungi    | yes | no  | yes |
| united kingdom | epidinium ecaudatum                | Protozoa | no  | no  | no  |
| united kingdom | louping ill virus                  | Virus    | yes | yes | no  |
| united kingdom | abothrium gadi                     | Helminth | no  | no  | no  |
| united kingdom | human immunodeficiency virus 1     | Virus    | yes | no  | yes |
| united kingdom | babesia divergens                  | Protozoa | yes | yes | no  |
| united kingdom | rhodotorula mucilaginosa           | Fungi    | yes | yes | no  |
| united kingdom | malassezia obtusa                  | Fungi    | yes | yes | no  |
| united kingdom | trypanosoma corvi                  | Protozoa | no  | no  | no  |
| united kingdom | treponema vincentii                | Bacteria | no  | no  | no  |
| united kingdom | entobdella soleae                  | Helminth | no  | no  | no  |
| united kingdom | leptocotyle minor                  | Helminth | no  | no  | no  |
| united kingdom | aporocotyle spinosicanalis         | Helminth | no  | no  | no  |
| united kingdom | cryptococcus neoformans            | Fungi    | yes | yes | yes |
| united kingdom | renibacterium salmoninarum         | Bacteria | no  | no  | no  |
| united kingdom | piscirickettsia salmonis           | Bacteria | no  | no  | no  |
| united kingdom | yersinia pestis                    | Bacteria | yes | yes | yes |
| united kingdom | primate t-lymphotropic virus 1     | Virus    | no  | no  | no  |
| united kingdom | stenotrophomonas maltophilia       | Bacteria | no  | no  | no  |
| united kingdom | myxoma virus                       | Virus    | no  | no  | no  |
| united kingdom | coxiella burnetii                  | Bacteria | yes | yes | no  |

|                |                                    |          |     |     |     |
|----------------|------------------------------------|----------|-----|-----|-----|
| united kingdom | taylorella equigenitalis           | Bacteria | no  | no  | no  |
| united kingdom | chryseobacterium indologenes       | Bacteria | no  | no  | no  |
| united kingdom | trypanosoma simiae                 | Protozoa | no  | no  | no  |
| united kingdom | unidentified nematode              | Helminth | no  | no  | no  |
| united kingdom | clostridium botulinum              | Bacteria | yes | yes | yes |
| united kingdom | teladorsagia circumcincta          | Helminth | yes | yes | no  |
| united kingdom | plectanocotyle gurnardi            | Helminth | no  | no  | no  |
| united kingdom | trypanosoma dionisii               | Protozoa | no  | no  | no  |
| united kingdom | aeromonas hydrophila               | Bacteria | yes | yes | yes |
| united kingdom | legionella pneumophila             | Bacteria | yes | no  | yes |
| united kingdom | zoogonoides viviparus              | Helminth | no  | no  | no  |
| united kingdom | variola virus                      | Virus    | no  | no  | no  |
| united kingdom | plasmodium falciparum              | Protozoa | yes | no  | yes |
| united kingdom | rabbit picobirnavirus              | Virus    | no  | no  | no  |
| united kingdom | delftia acidovorans                | Bacteria | yes | no  | no  |
| united kingdom | lecythophora hoffmannii            | Fungi    | yes | no  | no  |
| united kingdom | mycoplasma genitalium              | Bacteria | yes | no  | no  |
| united kingdom | mycoplasma pneumoniae              | Bacteria | yes | no  | no  |
| united kingdom | border disease virus               | Virus    | no  | no  | no  |
| united kingdom | gyrodactyloides bychowskii         | Helminth | no  | no  | no  |
| united kingdom | capsala martinieri                 | Helminth | no  | no  | no  |
| united kingdom | human astrovirus                   | Virus    | yes | no  | yes |
| united kingdom | trichostrongylus axei              | Helminth | yes | yes | no  |
| united kingdom | bovine respiratory syncytial virus | Virus    | no  | no  | no  |
| united kingdom | veillonella atypica                | Bacteria | yes | no  | no  |
| united kingdom | pilobolus sphaerosporus            | Fungi    | no  | no  | no  |
| united kingdom | pasteurella skyensis               | Bacteria | no  | no  | no  |
| united kingdom | bacillus megaterium                | Bacteria | no  | no  | no  |
| united kingdom | discocotyle sagittata              | Helminth | no  | no  | no  |
| united kingdom | sapporo virus                      | Virus    | no  | no  | no  |
| united kingdom | campylobacter lari                 | Bacteria | yes | yes | no  |
| united kingdom | human papillomavirus 18            | Virus    | no  | no  | no  |
| united kingdom | pseudallescheria boydii            | Fungi    | no  | no  | no  |
| united kingdom | streptococcus pneumoniae           | Bacteria | yes | yes | yes |
| united kingdom | varibaculum cambriense             | Bacteria | no  | no  | no  |
| united kingdom | campylobacter hominis              | Bacteria | no  | no  | no  |
| united kingdom | flavonifractor plautii             | Bacteria | no  | no  | no  |
| united kingdom | ichthyocotylurus variegatus        | Helminth | no  | no  | no  |
| united kingdom | enterobacter cloacae               | Bacteria | yes | yes | no  |
| united kingdom | eggerthella lenta                  | Bacteria | yes | yes | no  |
| united kingdom | diplostomum mergi                  | Helminth | no  | no  | no  |
| united kingdom | mycobacterium tuberculosis         | Bacteria | yes | yes | yes |
| united kingdom | stephanostomum baccatum            | Helminth | no  | no  | no  |
| united kingdom | crossobothrium longicolle          | Helminth | no  | no  | no  |
| united kingdom | eubothrium salvelini               | Helminth | no  | no  | no  |
| united kingdom | diplostomum spathaceum             | Helminth | yes | yes | no  |
| united kingdom | jc polyomavirus                    | Virus    | no  | no  | no  |
| united kingdom | human respiratory syncytial virus  | Virus    | yes | no  | no  |
| united kingdom | arthroderma otae                   | Fungi    | no  | no  | no  |
| united kingdom | exiguobacterium acetylicum         | Bacteria | no  | no  | no  |

|                |                                      |          |     |     |     |
|----------------|--------------------------------------|----------|-----|-----|-----|
| united kingdom | actinomyces oricola                  | Bacteria | no  | no  | no  |
| united kingdom | streptococcus dysgalactiae           | Bacteria | no  | no  | no  |
| united kingdom | merlucciotrema praeclarum            | Helminth | no  | no  | no  |
| united kingdom | human herpesvirus 5                  | Virus    | yes | no  | yes |
| united kingdom | diphyllobothrium dendriticum         | Helminth | yes | yes | no  |
| united kingdom | theileria mutans                     | Protozoa | no  | no  | no  |
| united kingdom | pichia kudriavzevii                  | Fungi    | no  | no  | no  |
| united kingdom | prevotella oris                      | Bacteria | yes | no  | no  |
| united kingdom | echinobothrium harfordi              | Helminth | no  | no  | no  |
| united kingdom | burkholderia fungorum                | Bacteria | no  | no  | no  |
| united kingdom | pasteurella multocida                | Bacteria | yes | yes | no  |
| united kingdom | pseudomonas stutzeri                 | Bacteria | yes | no  | no  |
| united kingdom | chlamydia trachomatis                | Bacteria | yes | yes | yes |
| united kingdom | murid herpesvirus 2                  | Virus    | no  | no  | no  |
| united kingdom | flavobacterium columnare             | Bacteria | no  | no  | no  |
| united kingdom | infectious pancreatic necrosis virus | Virus    | no  | no  | no  |
| united kingdom | paracoccus zeaxanthinifaciens        | Bacteria | no  | no  | no  |
| united kingdom | borrelia burgdorferi                 | Bacteria | yes | yes | yes |
| united kingdom | didymozoon scombri                   | Helminth | no  | no  | no  |
| united kingdom | candida albicans                     | Fungi    | yes | yes | yes |
| united kingdom | cooperia oncophora                   | Helminth | no  | no  | no  |
| united kingdom | infectious salmon anemia virus       | Virus    | no  | no  | no  |
| united kingdom | burkholderia multivorans             | Bacteria | no  | no  | no  |
| united kingdom | neodeightonia subglobosa             | Fungi    | no  | no  | no  |
| united kingdom | goose parvovirus                     | Virus    | no  | no  | no  |
| united kingdom | cryptosporidium felis                | Protozoa | no  | no  | no  |
| united kingdom | campylobacter gracilis               | Bacteria | yes | no  | no  |
| united kingdom | streptococcus milleri                | Bacteria | yes | no  | no  |
| united kingdom | streptococcus sanguinis              | Bacteria | yes | no  | no  |
| united kingdom | bartonella taylorii                  | Bacteria | no  | no  | no  |
| united kingdom | lecithaster gibbosus                 | Helminth | no  | no  | no  |
| united kingdom | serratia plymuthica                  | Bacteria | yes | no  | no  |
| united kingdom | klebsiella pneumoniae                | Bacteria | yes | yes | yes |
| united kingdom | diplostomum paracaudum               | Helminth | no  | no  | no  |
| united kingdom | toxascaris leonina                   | Helminth | yes | yes | no  |
| united kingdom | ligula intestinalis                  | Helminth | yes | yes | no  |
| united kingdom | burkholderia cepacia                 | Bacteria | yes | no  | no  |
| united kingdom | pomphorhynchus laevis                | Helminth | no  | no  | no  |
| united kingdom | molluscum contagiosum virus          | Virus    | yes | no  | no  |
| united kingdom | ureaplasma urealyticum               | Bacteria | yes | yes | no  |
| united kingdom | raoultella planticola                | Bacteria | no  | no  | no  |
| united kingdom | cryptosporidium parvum               | Protozoa | yes | yes | yes |
| united kingdom | ascaris suum                         | Helminth | yes | yes | no  |
| united kingdom | toxocara canis                       | Helminth | yes | yes | no  |
| united kingdom | rabies virus                         | Virus    | yes | yes | yes |
| united kingdom | anaplasma phagocytophilum            | Bacteria | no  | no  | no  |
| united kingdom | fellodistomum fellis                 | Helminth | no  | no  | no  |
| united kingdom | streptococcus uberis                 | Bacteria | yes | yes | no  |
| united kingdom | bacillus subtilis                    | Bacteria | yes | yes | no  |
| united kingdom | rhpidocotyle galeata                 | Helminth | no  | no  | no  |

|                |                                 |          |     |     |     |
|----------------|---------------------------------|----------|-----|-----|-----|
| united kingdom | human herpesvirus 3             | Virus    | no  | no  | no  |
| united kingdom | proteus mirabilis               | Bacteria | yes | yes | no  |
| united kingdom | malassezia furfur               | Fungi    | yes | yes | no  |
| united kingdom | fasciola hepatica               | Helminth | yes | yes | no  |
| united kingdom | porcine parvovirus              | Virus    | no  | no  | no  |
| united kingdom | treponema pallidum              | Bacteria | yes | no  | yes |
| united kingdom | ectromelia virus                | Virus    | no  | no  | no  |
| united kingdom | apatemon annuligerum            | Helminth | no  | no  | no  |
| united kingdom | vaccinia virus                  | Virus    | no  | no  | no  |
| united kingdom | duck hepatitis a virus          | Virus    | no  | no  | no  |
| united kingdom | human metapneumovirus           | Virus    | no  | no  | no  |
| united kingdom | apatemon gracilis               | Helminth | no  | no  | no  |
| united kingdom | alphacoronavirus 1              | Virus    | no  | no  | no  |
| united kingdom | trichostrongylus retortaeformis | Helminth | no  | no  | no  |
| united kingdom | campylobacter fetus             | Bacteria | yes | yes | yes |
| united kingdom | diplostomum baeri               | Helminth | no  | no  | no  |
| united kingdom | staphylococcus epidermidis      | Bacteria | yes | yes | yes |
| united kingdom | eubacterium brachy              | Bacteria | yes | yes | no  |
| united kingdom | neisseria lactamica             | Bacteria | yes | no  | no  |
| united kingdom | coprinellus micaceus            | Fungi    | no  | no  | no  |
| united kingdom | primate t-lymphotropic virus 2  | Virus    | no  | no  | no  |
| united kingdom | malassezia slooffiae            | Fungi    | no  | no  | no  |
| united kingdom | classical swine fever virus     | Virus    | no  | no  | no  |
| united kingdom | influenza b virus               | Virus    | yes | yes | no  |
| united kingdom | coprinopsis cinerea             | Fungi    | no  | no  | no  |
| united kingdom | feline calicivirus              | Virus    | no  | no  | no  |
| united kingdom | bk polyomavirus                 | Virus    | no  | no  | no  |
| united kingdom | lactobacillus rhamnosus         | Bacteria | no  | no  | no  |
| united kingdom | bordetella petrii               | Bacteria | no  | no  | no  |
| united kingdom | bartonella doshiae              | Bacteria | no  | no  | no  |
| united kingdom | equine rhinitis a virus         | Virus    | no  | no  | no  |
| united kingdom | carnobacterium maltaromaticum   | Bacteria | no  | no  | no  |
| united kingdom | stercorophorus margolisi        | Helminth | no  | no  | no  |
| united kingdom | mycobacterium celatum           | Bacteria | yes | no  | no  |
| united kingdom | mycobacterium smegmatis         | Bacteria | no  | no  | no  |
| united kingdom | arcobacter cryaerophilus        | Bacteria | yes | yes | no  |
| united kingdom | streptococcus parasanguinis     | Bacteria | no  | no  | no  |
| united kingdom | mosgovoyia pectinata            | Helminth | no  | no  | no  |
| united kingdom | schistosoma haematobium         | Helminth | yes | yes | no  |
| united kingdom | faecalibacterium prausnitzii    | Bacteria | no  | no  | no  |
| united kingdom | bartonella grahamii             | Bacteria | no  | no  | no  |
| united kingdom | fowl adenovirus d               | Virus    | no  | no  | no  |
| united kingdom | brevundimonas vesicularis       | Bacteria | yes | no  | no  |
| united kingdom | rotavirus a                     | Virus    | yes | yes | yes |
| united kingdom | bothriocephalus scorpii         | Helminth | no  | no  | no  |
| united kingdom | leptospira interrogans          | Bacteria | yes | yes | yes |
| united kingdom | salmon pancreas disease virus   | Virus    | no  | no  | no  |
| united kingdom | pseudomonas fluorescens         | Bacteria | yes | no  | no  |
| united kingdom | hepatitis e virus               | Virus    | yes | yes | yes |
| united kingdom | prosorhynchoides gracilescens   | Helminth | no  | no  | no  |

|                |                             |          |     |     |     |
|----------------|-----------------------------|----------|-----|-----|-----|
| united kingdom | streptococcus agalactiae    | Bacteria | yes | yes | no  |
| united kingdom | brucella abortus            | Bacteria | yes | yes | no  |
| united kingdom | trichostrongylus tenuis     | Helminth | no  | no  | no  |
| united kingdom | yersinia enterocolitica     | Bacteria | yes | yes | yes |
| united kingdom | human enterovirus c         | Virus    | yes | no  | no  |
| united kingdom | pseudomonas putida          | Bacteria | yes | no  | no  |
| united kingdom | bacillus licheniformis      | Bacteria | yes | yes | no  |
| united kingdom | angiostrongylus vasorum     | Helminth | no  | no  | no  |
| united kingdom | streptococcus constellatus  | Bacteria | yes | no  | no  |
| united kingdom | onchocerca lienalis         | Helminth | no  | no  | no  |
| united kingdom | cladophialophora bantiana   | Fungi    | yes | yes | no  |
| united kingdom | neisseria meningitidis      | Bacteria | yes | no  | yes |
| united kingdom | norwalk virus               | Virus    | yes | no  | yes |
| united kingdom | shigella flexneri           | Bacteria | yes | yes | no  |
| united kingdom | cupriavidus taiwanensis     | Bacteria | no  | no  | no  |
| united kingdom | cladophialophora devriesii  | Fungi    | yes | no  | no  |
| united kingdom | eimeria tenella             | Protozoa | no  | no  | no  |
| united kingdom | kuhnia scombri              | Helminth | no  | no  | no  |
| united kingdom | streptococcus mitis         | Bacteria | yes | no  | no  |
| united kingdom | brucella melitensis         | Bacteria | yes | yes | yes |
| united kingdom | actinomyces naeslundii      | Bacteria | yes | yes | no  |
| united kingdom | gyrodactylus teuchis        | Helminth | no  | no  | no  |
| united kingdom | pneumocystis jirovecii      | Fungi    | no  | no  | no  |
| united kingdom | haemonchus contortus        | Helminth | yes | yes | no  |
| united kingdom | shewanella putrefaciens     | Bacteria | no  | no  | no  |
| united kingdom | actinomyces oris            | Bacteria | no  | no  | no  |
| united kingdom | cetacean morbillivirus      | Virus    | no  | no  | no  |
| united kingdom | shigella sonnei             | Bacteria | yes | yes | no  |
| united kingdom | streptococcus oralis        | Bacteria | no  | no  | no  |
| united kingdom | diphyllobothrium ditremum   | Helminth | no  | no  | no  |
| united kingdom | murid herpesvirus 1         | Virus    | no  | no  | no  |
| united kingdom | corynebacterium diphtheriae | Bacteria | yes | no  | yes |
| united kingdom | aspergillus niger           | Fungi    | yes | yes | no  |
| united kingdom | mycobacterium xenopi        | Bacteria | yes | yes | no  |
| united kingdom | cryptosporidium canis       | Protozoa | no  | no  | no  |
| united kingdom | acanthamoeba polyphaga      | Protozoa | yes | no  | no  |
| united kingdom | talaromyces eburneus        | Fungi    | no  | no  | no  |
| united kingdom | staphylococcus sciuri       | Bacteria | no  | no  | no  |
| united kingdom | lactobacillus plantarum     | Bacteria | no  | no  | no  |
| united kingdom | histophilus somni           | Bacteria | no  | no  | no  |
| united kingdom | human papillomavirus 6      | Virus    | no  | no  | no  |
| united kingdom | chlamydomyces abortus       | Bacteria | no  | no  | no  |
| united kingdom | neisseria bacilliformis     | Bacteria | no  | no  | no  |
| united kingdom | chicken astrovirus          | Virus    | no  | no  | no  |
| united kingdom | streptococcus pyogenes      | Bacteria | yes | yes | yes |
| united kingdom | streptococcus salivarius    | Bacteria | yes | no  | no  |
| united kingdom | selenomonas infelix         | Bacteria | yes | no  | no  |
| united kingdom | clostridium novyi           | Bacteria | yes | yes | no  |
| united kingdom | serratia marcescens         | Bacteria | yes | yes | yes |
| united kingdom | trichomonas gallinae        | Protozoa | no  | no  | no  |

|                |                                           |          |     |     |     |
|----------------|-------------------------------------------|----------|-----|-----|-----|
| united kingdom | <i>candida dubliniensis</i>               | Fungi    | yes | no  | no  |
| united kingdom | <i>mycoplasma coccoides</i>               | Bacteria | no  | no  | no  |
| united kingdom | human herpesvirus 2                       | Virus    | no  | no  | no  |
| united kingdom | <i>lactobacillus paracasei</i>            | Bacteria | no  | no  | no  |
| united kingdom | <i>corynebacterium pseudotuberculosis</i> | Bacteria | yes | yes | no  |
| united kingdom | <i>cryptosporidium andersoni</i>          | Protozoa | no  | no  | no  |
| united kingdom | <i>pseudamphistomum truncatum</i>         | Helminth | yes | yes | no  |
| united kingdom | human adenovirus c                        | Virus    | yes | no  | no  |
| united kingdom | <i>bordetella pertussis</i>               | Bacteria | yes | no  | yes |
| united kingdom | <i>serratia proteamaculans</i>            | Bacteria | yes | no  | no  |
| united kingdom | bluetongue virus                          | Virus    | no  | no  | no  |
| united kingdom | <i>abiotrophia defectiva</i>              | Bacteria | yes | no  | no  |
| united kingdom | <i>streptococcus suis</i>                 | Bacteria | yes | yes | no  |
| united kingdom | <i>fusarium solani</i>                    | Fungi    | yes | yes | yes |
| united kingdom | simian immunodeficiency virus             | Virus    | no  | no  | no  |
| united kingdom | <i>acanthamoeba castellanii</i>           | Protozoa | no  | no  | no  |
| united kingdom | <i>candida glabrata</i>                   | Fungi    | yes | yes | yes |
| united kingdom | elephantid herpesvirus 1                  | Virus    | no  | no  | no  |
| united kingdom | <i>lactobacillus casei</i>                | Bacteria | no  | no  | no  |
| united kingdom | <i>prevotella loescheii</i>               | Bacteria | yes | no  | no  |
| united kingdom | <i>moritella viscosa</i>                  | Bacteria | no  | no  | no  |
| united kingdom | <i>fusobacterium gonidiaformans</i>       | Bacteria | no  | no  | no  |
| united kingdom | hepatitis a virus                         | Virus    | yes | yes | yes |
| united kingdom | <i>microbacterium phyllosphaerae</i>      | Bacteria | no  | no  | no  |
| united kingdom | <i>xanthomonas campestris</i>             | Bacteria | no  | no  | no  |
| united kingdom | <i>cryptosporidium hominis</i>            | Protozoa | yes | no  | yes |
| united kingdom | <i>haemophilus influenzae</i>             | Bacteria | yes | no  | yes |
| united kingdom | <i>dictyocotyle coeliaca</i>              | Helminth | no  | no  | no  |
| united kingdom | <i>bacillus thuringiensis</i>             | Bacteria | yes | no  | no  |
| united kingdom | <i>campylobacter coli</i>                 | Bacteria | yes | yes | no  |
| united kingdom | <i>listeria monocytogenes</i>             | Bacteria | yes | yes | yes |
| united kingdom | human parechovirus                        | Virus    | no  | no  | no  |
| united kingdom | <i>bordetella bronchiseptica</i>          | Bacteria | yes | yes | no  |
| united kingdom | porcine type-c oncovirus                  | Virus    | no  | no  | no  |
| united kingdom | <i>aspergillus fumigatus</i>              | Fungi    | no  | no  | no  |
| united kingdom | <i>ichthyocotylurus erraticus</i>         | Helminth | no  | no  | no  |
| united kingdom | <i>malassezia restricta</i>               | Fungi    | yes | yes | no  |
| united kingdom | <i>anchistrocephalus microcephalus</i>    | Helminth | no  | no  | no  |
| united kingdom | <i>yersinia pseudotuberculosis</i>        | Bacteria | yes | yes | no  |
| united kingdom | <i>phyllobothrium lactuca</i>             | Helminth | no  | no  | no  |
| united kingdom | <i>staphylococcus hominis</i>             | Bacteria | no  | no  | no  |
| united kingdom | human herpesvirus 4                       | Virus    | no  | no  | no  |
| united kingdom | <i>arthroderma benhamiae</i>              | Fungi    | no  | no  | no  |
| united kingdom | human adenovirus f                        | Virus    | yes | no  | no  |
| united kingdom | rotavirus c                               | Virus    | yes | yes | yes |
| united kingdom | <i>plasmodium malariae</i>                | Protozoa | yes | yes | no  |
| united kingdom | <i>ochrobactrum anthropi</i>              | Bacteria | yes | no  | no  |
| united kingdom | <i>pneumocystis carinii</i>               | Fungi    | yes | yes | yes |
| united kingdom | <i>echinococcus multilocularis</i>        | Helminth | yes | yes | no  |
| united kingdom | <i>pasteurella mairii</i>                 | Bacteria | no  | no  | no  |

|                |                                      |          |     |     |     |
|----------------|--------------------------------------|----------|-----|-----|-----|
| united kingdom | carnobacterium divergens             | Bacteria | no  | no  | no  |
| united kingdom | neospora caninum                     | Protozoa | no  | no  | no  |
| united kingdom | dilepis undula                       | Helminth | no  | no  | no  |
| united kingdom | diclidophora denticulata             | Helminth | no  | no  | no  |
| united kingdom | bacteroides ovatus                   | Bacteria | yes | no  | no  |
| united kingdom | diclidophora minor                   | Helminth | no  | no  | no  |
| united kingdom | jaagsiekte sheep retrovirus          | Virus    | no  | no  | no  |
| united kingdom | human papillomavirus 16              | Virus    | no  | no  | no  |
| united kingdom | porcine enterovirus b                | Virus    | no  | no  | no  |
| united kingdom | uronema marinum                      | Protozoa | no  | no  | no  |
| united kingdom | aureobasidium pullulans              | Fungi    | yes | no  | no  |
| united kingdom | aeromonas veronii                    | Bacteria | yes | no  | yes |
| united kingdom | bothriocephalus acheilognathi        | Helminth | no  | no  | no  |
| united kingdom | prevotella veroralis                 | Bacteria | yes | no  | no  |
| united kingdom | hippotragine herpesvirus 1           | Virus    | no  | no  | no  |
| united kingdom | wardoides nyrocae                    | Helminth | no  | no  | no  |
| united kingdom | european bat lyssavirus 2            | Virus    | yes | yes | no  |
| united kingdom | trypanosoma granulorum               | Protozoa | no  | no  | no  |
| united kingdom | human adenovirus b                   | Virus    | yes | no  | no  |
| united kingdom | propionibacterium acnes              | Bacteria | yes | yes | no  |
| united kingdom | feline immunodeficiency virus        | Virus    | no  | no  | no  |
| united kingdom | trypanosoma microti                  | Protozoa | no  | no  | no  |
| united kingdom | citrobacter freundii                 | Bacteria | yes | yes | no  |
| united kingdom | aspergillus ochraceus                | Fungi    | no  | no  | no  |
| united kingdom | ditrachocephalum macrocephalum       | Helminth | no  | no  | no  |
| united kingdom | measles virus                        | Virus    | yes | yes | yes |
| united kingdom | corynebacterium pseudodiphtheriticum | Bacteria | no  | no  | no  |
| united kingdom | entodinium caudatum                  | Protozoa | no  | no  | no  |
| united kingdom | actinobacillus rossii                | Bacteria | no  | no  | no  |
| united kingdom | taenia hydatigena                    | Helminth | no  | no  | no  |
| united kingdom | glugea anomala                       | Fungi    | no  | no  | no  |
| united kingdom | cryptosporidium meleagridis          | Protozoa | no  | no  | no  |
| united kingdom | echinococcus equinus                 | Helminth | no  | no  | no  |
| united kingdom | debaryomyces hansenii                | Fungi    | no  | no  | no  |
| united kingdom | human immunodeficiency virus 2       | Virus    | yes | no  | yes |
| united kingdom | pseudomonas aeruginosa               | Bacteria | yes | yes | yes |
| united kingdom | echeneibothrium maculatum            | Helminth | no  | no  | no  |
| united kingdom | human enterovirus b                  | Virus    | yes | no  | yes |
| united kingdom | dermatophilus congolensis            | Bacteria | yes | yes | no  |
| united kingdom | bacteroides fragilis                 | Bacteria | yes | yes | no  |
| united kingdom | feline foamy virus                   | Virus    | no  | no  | no  |
| united kingdom | human rhinovirus c                   | Virus    | no  | no  | no  |
| united kingdom | lactococcus lactis                   | Bacteria | no  | no  | no  |
| united kingdom | bovine herpesvirus 1                 | Virus    | no  | no  | no  |
| united kingdom | grillotia erinaceus                  | Helminth | no  | no  | no  |
| united kingdom | chlamydomyces pneumoniae             | Bacteria | yes | yes | no  |
| united kingdom | nematodirus battus                   | Helminth | no  | no  | no  |
| united kingdom | micrococcus luteus                   | Bacteria | no  | no  | no  |
| united kingdom | mycobacterium chelonae               | Bacteria | yes | yes | no  |
| united kingdom | newcastle disease virus              | Virus    | yes | yes | no  |

|                |                                    |          |     |     |     |
|----------------|------------------------------------|----------|-----|-----|-----|
| united kingdom | gyrodactylus kobayashii            | Helminth | no  | no  | no  |
| united kingdom | torque teno sus virus 1            | Virus    | no  | no  | no  |
| united kingdom | epidermophyton floccosum           | Fungi    | yes | yes | no  |
| united kingdom | aspergillus versicolor             | Fungi    | yes | no  | no  |
| united kingdom | mannheimia haemolytica             | Bacteria | no  | no  | no  |
| united kingdom | prevotella ruminicola              | Bacteria | yes | yes | no  |
| united kingdom | sutterella wadsworthensis          | Bacteria | yes | no  | no  |
| united kingdom | clostridium innocuum               | Bacteria | no  | no  | no  |
| united kingdom | gyrodactylus derjavini             | Helminth | no  | no  | no  |
| united kingdom | malassezia globosa                 | Fungi    | yes | yes | no  |
| united kingdom | cowpox virus                       | Virus    | yes | yes | no  |
| united kingdom | mycoplasma bovigenitalium          | Bacteria | no  | no  | no  |
| united kingdom | lymphocytic choriomeningitis virus | Virus    | yes | yes | no  |
| united kingdom | echinococcus granulosus            | Helminth | yes | yes | yes |
| united kingdom | trypanosoma lewisi                 | Protozoa | no  | no  | no  |
| united kingdom | neocallimastix hurleyensis         | Fungi    | no  | no  | no  |
| united kingdom | rhodococcus erythropolis           | Bacteria | yes | no  | no  |
| united kingdom | streptococcus intermedius          | Bacteria | yes | yes | no  |
| united kingdom | acinetobacter baumannii            | Bacteria | yes | no  | no  |
| united kingdom | rubella virus                      | Virus    | yes | no  | no  |
| united kingdom | chabertia ovina                    | Helminth | no  | no  | no  |
| united kingdom | dietzia maris                      | Bacteria | no  | no  | no  |
| united kingdom | mycoplasma hominis                 | Bacteria | yes | no  | no  |
| united kingdom | feline leukemia virus              | Virus    | no  | no  | no  |
| united kingdom | proteocephalus filicollis          | Helminth | no  | no  | no  |
| united kingdom | orchipedum tracheicola             | Helminth | no  | no  | no  |
| united kingdom | hepatitis b virus                  | Virus    | yes | no  | yes |
| united kingdom | bunostomum trigonocephalum         | Helminth | no  | no  | no  |
| united kingdom | streptococcus equi                 | Bacteria | yes | yes | no  |
| united kingdom | lecithocladium excisum             | Helminth | no  | no  | no  |
| united kingdom | derogenes varicus                  | Helminth | no  | no  | no  |
| united kingdom | sordaria alcina                    | Fungi    | no  | no  | no  |
| united kingdom | human parainfluenza virus 3        | Virus    | yes | no  | no  |
| united kingdom | trichostrongylus vitrinus          | Helminth | yes | yes | no  |
| united kingdom | flavobacterium psychrophilum       | Bacteria | no  | no  | no  |
| united kingdom | infectious bursal disease virus    | Virus    | no  | no  | no  |
| united kingdom | ostertagia ostertagi               | Helminth | yes | yes | no  |
| united kingdom | echinoparyphium recurvatum         | Helminth | yes | yes | no  |
| united kingdom | escherichia coli                   | Bacteria | yes | yes | yes |
| united kingdom | cryptosporidium ubiquitum          | Protozoa | no  | no  | no  |
| united kingdom | shigella boydii                    | Bacteria | yes | yes | no  |
| united kingdom | simian foamy virus                 | Virus    | no  | no  | no  |
| united kingdom | arthroderma vanbreuseghemii        | Fungi    | no  | no  | no  |
| united kingdom | eimeria maxima                     | Protozoa | no  | no  | no  |
| united kingdom | human herpesvirus 8                | Virus    | yes | no  | yes |
| united kingdom | heligmosomoides polygyrus          | Helminth | no  | no  | no  |
| united kingdom | trogloodytella abrassarti          | Protozoa | no  | no  | no  |
| united kingdom | moraxella catarrhalis              | Bacteria | no  | no  | no  |
| united kingdom | gilquinia squali                   | Helminth | no  | no  | no  |
| united kingdom | atractolytocestus huronensis       | Helminth | no  | no  | no  |



|                |                                |          |     |     |     |
|----------------|--------------------------------|----------|-----|-----|-----|
| united kingdom | chlamydomyces psittaci         | Bacteria | yes | yes | no  |
| united kingdom | beak and feather disease virus | Virus    | no  | no  | no  |
| united kingdom | streptococcus sobrinus         | Bacteria | yes | no  | no  |
| united kingdom | burkholderia cenocepacia       | Bacteria | no  | no  | no  |
| united kingdom | clostridium perfringens        | Bacteria | yes | yes | no  |
| united kingdom | fusobacterium ulcerans         | Bacteria | yes | no  | no  |
| united kingdom | staphylococcus pasteurii       | Bacteria | no  | no  | no  |
| united kingdom | neoscytalidium dimidiatum      | Fungi    | no  | no  | no  |
| united kingdom | helicobacter pylori            | Bacteria | yes | yes | no  |
| united kingdom | foot-and-mouth disease virus   | Virus    | no  | no  | no  |
| united kingdom | lewisia infectoria             | Fungi    | no  | no  | no  |
| united kingdom | porphyromonas gingivalis       | Bacteria | yes | yes | no  |
| united kingdom | fowlpox virus                  | Virus    | no  | no  | no  |
| united kingdom | bacillus pumilus               | Bacteria | yes | no  | no  |
| united kingdom | trichomonas vaginalis          | Protozoa | yes | no  | yes |
| united kingdom | parainfluenza virus 5          | Virus    | no  | no  | no  |
| united kingdom | newbury-1 virus                | Virus    | no  | no  | no  |
| united kingdom | acinetobacter calcoaceticus    | Bacteria | yes | no  | no  |
| united kingdom | alternaria alternata           | Fungi    | yes | yes | no  |
| united kingdom | human parvovirus b19           | Virus    | no  | no  | no  |
| united kingdom | salmonella enterica            | Bacteria | no  | no  | no  |
| united kingdom | bacillus cereus                | Bacteria | yes | yes | no  |
| united kingdom | entobdella hippoglossi         | Helminth | no  | no  | no  |
| united kingdom | haemophilus ducreyi            | Bacteria | yes | no  | yes |
| united kingdom | bovine enterovirus             | Virus    | no  | no  | no  |
| united kingdom | mycoplasma canis               | Bacteria | no  | no  | no  |
| united kingdom | mycoplasma bovis               | Bacteria | no  | no  | no  |
| united kingdom | lysiniibacillus sphaericus     | Bacteria | no  | no  | no  |
| united kingdom | pseudomonas brenneri           | Bacteria | no  | no  | no  |
| united kingdom | influenza a virus              | Virus    | yes | yes | yes |
| united kingdom | cryptosporidium cuniculus      | Protozoa | yes | yes | no  |
| united kingdom | torque teno sus virus 2        | Virus    | no  | no  | no  |
| united kingdom | mycobacterium marinum          | Bacteria | yes | yes | yes |
| united kingdom | corynebacterium atypicum       | Bacteria | no  | no  | no  |
| united kingdom | neocallimastix frontalis       | Fungi    | no  | no  | no  |
| united kingdom | streptococcus mutans           | Bacteria | yes | no  | no  |
| united kingdom | toxoplasma gondii              | Protozoa | yes | yes | yes |
| united kingdom | porcine adenovirus a           | Virus    | no  | no  | no  |
| united kingdom | enterococcus faecalis          | Bacteria | yes | yes | yes |
| united kingdom | rahnella aquatilis             | Bacteria | yes | no  | no  |
| united kingdom | emericella nidulans            | Fungi    | no  | no  | no  |
| united kingdom | bacillus circulans             | Bacteria | yes | no  | no  |
| united kingdom | neoparamoeba pemaquidensis     | Protozoa | no  | no  | no  |
| united kingdom | moniezia expansa               | Helminth | yes | yes | no  |
| united kingdom | pseudomonas fragi              | Bacteria | no  | no  | no  |
| united kingdom | canine distemper virus         | Virus    | no  | no  | no  |
| united kingdom | clostridium difficile          | Bacteria | yes | yes | yes |
| united kingdom | gaevskajatrema halosauropsi    | Helminth | no  | no  | no  |
| united kingdom | streptococcus anginosus        | Bacteria | yes | no  | no  |
| united kingdom | mycobacterium mucogenicum      | Bacteria | yes | yes | no  |

|               |                                    |          |     |     |     |
|---------------|------------------------------------|----------|-----|-----|-----|
| united states | plasmodium falciparum              | Protozoa | yes | no  | yes |
| united states | variola virus                      | Virus    | no  | no  | no  |
| united states | penicillium chrysogenum            | Fungi    | yes | no  | no  |
| united states | contraeaecum bioocai               | Helminth | no  | no  | no  |
| united states | vibrio mimicus                     | Bacteria | yes | yes | no  |
| united states | leptospira interrogans             | Bacteria | yes | yes | yes |
| united states | ajellomyces capsulatus             | Fungi    | no  | no  | no  |
| united states | avian adeno-associated virus       | Virus    | no  | no  | no  |
| united states | pilobolus sphaerosporus            | Fungi    | no  | no  | no  |
| united states | mycoplasma anatis                  | Bacteria | no  | no  | no  |
| united states | vibrio ordalii                     | Bacteria | no  | no  | no  |
| united states | bartonella vinsonii                | Bacteria | no  | no  | no  |
| united states | platybothrium auriculatum          | Helminth | no  | no  | no  |
| united states | canid herpesvirus 1                | Virus    | no  | no  | no  |
| united states | entamoeba histolytica              | Protozoa | yes | yes | no  |
| united states | viral hemorrhagic septicemia virus | Virus    | no  | no  | no  |
| united states | brucella neotomae                  | Bacteria | no  | no  | no  |
| united states | bacillus mycoides                  | Bacteria | yes | no  | no  |
| united states | bifidobacterium longum             | Bacteria | no  | no  | no  |
| united states | human papillomavirus 5             | Virus    | no  | no  | no  |
| united states | stenurus minor                     | Helminth | no  | no  | no  |
| united states | burkholderia rhizoxinica           | Bacteria | no  | no  | no  |
| united states | brachyspira pilosicoli             | Bacteria | no  | no  | no  |
| united states | bacillus anthracis                 | Bacteria | yes | yes | yes |
| united states | nybelinia indica                   | Helminth | no  | no  | no  |
| united states | ovine adenovirus a                 | Virus    | no  | no  | no  |
| united states | babesia divergens                  | Protozoa | yes | yes | no  |
| united states | chlamydia suis                     | Bacteria | no  | no  | no  |
| united states | taylorella equigenitalis           | Bacteria | no  | no  | no  |
| united states | psychrobacter sanguinis            | Bacteria | no  | no  | no  |
| united states | vibrio cholerae                    | Bacteria | yes | no  | yes |
| united states | sarcocystis neurona                | Protozoa | no  | no  | no  |
| united states | aspergillus carbonarius            | Fungi    | no  | no  | no  |
| united states | echinostoma revolutum              | Helminth | yes | yes | no  |
| united states | alphacoronavirus 1                 | Virus    | no  | no  | no  |
| united states | mycobacterium bovis                | Bacteria | yes | yes | yes |
| united states | cryptosporidium serpentis          | Protozoa | no  | no  | no  |
| united states | human respiratory syncytial virus  | Virus    | yes | no  | no  |
| united states | human enterovirus d                | Virus    | yes | no  | no  |
| united states | legionella pneumophila             | Bacteria | yes | no  | yes |
| united states | staphylococcus schleiferi          | Bacteria | no  | no  | no  |
| united states | fusarium falciforme                | Fungi    | no  | no  | no  |
| united states | massilia timonae                   | Bacteria | no  | no  | no  |
| united states | pseudodiplorchis americanus        | Helminth | no  | no  | no  |
| united states | bacillus megaterium                | Bacteria | no  | no  | no  |
| united states | burkholderia pseudomallei          | Bacteria | yes | yes | no  |
| united states | human parechovirus                 | Virus    | no  | no  | no  |
| united states | haemoproteus meleagridis           | Protozoa | no  | no  | no  |
| united states | rothia aeria                       | Bacteria | no  | no  | no  |
| united states | theileria cervi                    | Protozoa | no  | no  | no  |

|               |                                         |          |     |     |     |
|---------------|-----------------------------------------|----------|-----|-----|-----|
| united states | bk polyomavirus                         | Virus    | no  | no  | no  |
| united states | babesia motasi                          | Protozoa | no  | no  | no  |
| united states | chlamydia trachomatis                   | Bacteria | yes | yes | yes |
| united states | bovine respiratory syncytial virus      | Virus    | no  | no  | no  |
| united states | porcine reproductive and respiratory s  | Virus    | no  | no  | no  |
| united states | pseudallescheria minutispora            | Fungi    | no  | no  | no  |
| united states | infectious bursal disease virus         | Virus    | no  | no  | no  |
| united states | pasteurella caballi                     | Bacteria | yes | yes | no  |
| united states | dietzia maris                           | Bacteria | no  | no  | no  |
| united states | human immunodeficiency virus 2          | Virus    | yes | no  | yes |
| united states | paranoplocephala arctica                | Helminth | no  | no  | no  |
| united states | equid herpesvirus 2                     | Virus    | no  | no  | no  |
| united states | capronia semiimmersa                    | Fungi    | no  | no  | no  |
| united states | helicobacter pullorum                   | Bacteria | yes | yes | no  |
| united states | thelazia lacrymalis                     | Helminth | no  | no  | no  |
| united states | pongine herpesvirus 2                   | Virus    | no  | no  | no  |
| united states | heterobilharzia americana               | Helminth | yes | yes | no  |
| united states | sporothrix schenckii                    | Fungi    | yes | yes | no  |
| united states | plasmodium relictum                     | Protozoa | no  | no  | no  |
| united states | mycoplasma ovis                         | Bacteria | no  | no  | no  |
| united states | infectious pancreatic necrosis virus    | Virus    | no  | no  | no  |
| united states | dirofilaria tenuis                      | Helminth | yes | yes | no  |
| united states | monkeypox virus                         | Virus    | yes | yes | yes |
| united states | feline immunodeficiency virus           | Virus    | no  | no  | no  |
| united states | human metapneumovirus                   | Virus    | no  | no  | no  |
| united states | chicken astrovirus                      | Virus    | no  | no  | no  |
| united states | bordetella holmesii                     | Bacteria | no  | no  | no  |
| united states | contraecum rudolphii                    | Helminth | no  | no  | no  |
| united states | brucella suis                           | Bacteria | yes | yes | no  |
| united states | agrobacterium larrymoorei               | Bacteria | no  | no  | no  |
| united states | tenacibaculum discolor                  | Bacteria | no  | no  | no  |
| united states | infectious hematopoietic necrosis virus | Virus    | no  | no  | no  |
| united states | vibrio tapetis                          | Bacteria | no  | no  | no  |
| united states | st. louis encephalitis virus            | Virus    | yes | yes | yes |
| united states | bartonella capreoli                     | Bacteria | no  | no  | no  |
| united states | enterobacter cloacae                    | Bacteria | yes | yes | no  |
| united states | aspergillus tubingensis                 | Fungi    | no  | no  | no  |
| united states | pentatrichomonas hominis                | Protozoa | yes | yes | no  |
| united states | chelonid herpesvirus 5                  | Virus    | no  | no  | no  |
| united states | carettacola hawaiiensis                 | Helminth | no  | no  | no  |
| united states | dietzia natronolimnaea                  | Bacteria | no  | no  | no  |
| united states | encephalomyocarditis virus              | Virus    | yes | yes | no  |
| united states | arcobacter butzleri                     | Bacteria | yes | yes | no  |
| united states | mycobacterium leprae                    | Bacteria | yes | yes | yes |
| united states | gyrodactylus anguillae                  | Helminth | no  | no  | no  |
| united states | ictalurid herpesvirus 1                 | Virus    | no  | no  | no  |
| united states | streptococcus dysgalactiae              | Bacteria | no  | no  | no  |
| united states | tentacularia coryphaenae                | Helminth | no  | no  | no  |
| united states | neorickettsia risticii                  | Bacteria | no  | no  | no  |
| united states | bacteroides uniformis                   | Bacteria | yes | no  | no  |

|               |                                 |          |     |     |     |
|---------------|---------------------------------|----------|-----|-----|-----|
| united states | alaria mustelae                 | Helminth | no  | no  | no  |
| united states | aspergillus aculeatinus         | Fungi    | no  | no  | no  |
| united states | vibrio fortis                   | Bacteria | no  | no  | no  |
| united states | chikungunya virus               | Virus    | yes | yes | yes |
| united states | haemonchus placei               | Helminth | no  | no  | no  |
| united states | vibrio splendidus               | Bacteria | no  | no  | no  |
| united states | frog virus 3                    | Virus    | no  | no  | no  |
| united states | plasmodium chiricahuae          | Protozoa | no  | no  | no  |
| united states | carnobacterium maltaromaticum   | Bacteria | no  | no  | no  |
| united states | human herpesvirus 7             | Virus    | yes | no  | no  |
| united states | aspergillus westerdijkiae       | Fungi    | no  | no  | no  |
| united states | fusobacterium nucleatum         | Bacteria | yes | yes | no  |
| united states | enterovibrio norvegicus         | Bacteria | no  | no  | no  |
| united states | anaplasma platys                | Bacteria | no  | no  | no  |
| united states | tannerella forsythia            | Bacteria | no  | no  | no  |
| united states | apharyngostrigea pipientis      | Helminth | no  | no  | no  |
| united states | candida catenulata              | Fungi    | yes | no  | no  |
| united states | echinococcus canadensis         | Helminth | no  | no  | no  |
| united states | sturgeon adenovirus a           | Virus    | no  | no  | no  |
| united states | spirocamallanus istiblenni      | Helminth | no  | no  | no  |
| united states | mycobacterium avium             | Bacteria | yes | yes | yes |
| united states | campylobacter jejuni            | Bacteria | yes | yes | yes |
| united states | staphylococcus pseudintermedius | Bacteria | no  | no  | no  |
| united states | dujardinascaris waltoni         | Helminth | no  | no  | no  |
| united states | cystoopsis atractostei          | Helminth | no  | no  | no  |
| united states | borrelia americana              | Bacteria | no  | no  | no  |
| united states | borrelia andersonii             | Bacteria | no  | no  | no  |
| united states | neisseria meningitidis          | Bacteria | yes | no  | yes |
| united states | soboliphyme baturini            | Helminth | no  | no  | no  |
| united states | gallid herpesvirus 1            | Virus    | no  | no  | no  |
| united states | borrelia bissettii              | Bacteria | no  | no  | no  |
| united states | seneca valley virus             | Virus    | no  | no  | no  |
| united states | black creek canal virus         | Virus    | yes | yes | no  |
| united states | brucella melitensis             | Bacteria | yes | yes | yes |
| united states | mycoplasma ovipneumoniae        | Bacteria | no  | no  | no  |
| united states | psittacid herpesvirus 1         | Virus    | no  | no  | no  |
| united states | trichosporon dermatis           | Fungi    | no  | no  | no  |
| united states | bovine viral diarrhea virus 1   | Virus    | no  | no  | no  |
| united states | cotylogaster basiri             | Helminth | no  | no  | no  |
| united states | naegleria fowleri               | Protozoa | yes | no  | no  |
| united states | streptococcus pasteurianus      | Bacteria | no  | no  | no  |
| united states | shigella sonnei                 | Bacteria | yes | yes | no  |
| united states | pseudalius inflexus             | Helminth | no  | no  | no  |
| united states | dasymetra nicolli               | Helminth | no  | no  | no  |
| united states | photobacterium kishitanii       | Bacteria | no  | no  | no  |
| united states | haematoloechus complexus        | Helminth | no  | no  | no  |
| united states | leuconostoc pseudomesenteroides | Bacteria | no  | no  | no  |
| united states | pleistophora ovariae            | Fungi    | no  | no  | no  |
| united states | caecincola parvulus             | Helminth | no  | no  | no  |
| united states | microphallus basodactylophallus | Helminth | no  | no  | no  |

|               |                                   |          |     |     |     |
|---------------|-----------------------------------|----------|-----|-----|-----|
| united states | bovine viral diarrhea virus 2     | Virus    | no  | no  | no  |
| united states | human rhinovirus a                | Virus    | yes | no  | no  |
| united states | babesia odocoilei                 | Protozoa | no  | no  | no  |
| united states | aeromonas salmonicida             | Bacteria | no  | no  | no  |
| united states | diphyllobothrium stemmacephalum   | Helminth | yes | yes | no  |
| united states | prospect hill virus               | Virus    | no  | no  | no  |
| united states | leptonema illini                  | Bacteria | no  | no  | no  |
| united states | neisseria gonorrhoeae             | Bacteria | yes | no  | yes |
| united states | margolisianum bulbosum            | Helminth | no  | no  | no  |
| united states | edwardsiella tarda                | Bacteria | yes | yes | no  |
| united states | rickettsia africae                | Bacteria | yes | yes | no  |
| united states | human papillomavirus 7            | Virus    | no  | no  | no  |
| united states | chlamydomyces pecorum             | Bacteria | no  | no  | no  |
| united states | pseudoterranova decipiens         | Helminth | yes | no  | no  |
| united states | cladosporium cladosporioides      | Fungi    | yes | no  | no  |
| united states | floridatrema heardi               | Helminth | no  | no  | no  |
| united states | human herpesvirus 2               | Virus    | no  | no  | no  |
| united states | coxiella burnetii                 | Bacteria | yes | yes | no  |
| united states | klebsiella pneumoniae             | Bacteria | yes | yes | yes |
| united states | enterobacter amnigenus            | Bacteria | yes | yes | no  |
| united states | unidentified nematode             | Helminth | no  | no  | no  |
| united states | trypanosoma avium                 | Protozoa | no  | no  | no  |
| united states | mycobacterium salmoniphilum       | Bacteria | no  | no  | no  |
| united states | macrovestibulum obtusicaudum      | Helminth | no  | no  | no  |
| united states | ajellomyces dermatitidis          | Fungi    | no  | no  | no  |
| united states | penicillium concentricum          | Fungi    | no  | no  | no  |
| united states | canine adenovirus                 | Virus    | no  | no  | no  |
| united states | visna/maedi virus                 | Virus    | no  | no  | no  |
| united states | eastern equine encephalitis virus | Virus    | yes | yes | yes |
| united states | cottontail rabbit papillomavirus  | Virus    | no  | no  | no  |
| united states | leuconostoc mesenteroides         | Bacteria | no  | no  | no  |
| united states | avian coronavirus                 | Virus    | no  | no  | no  |
| united states | toxocara cati                     | Helminth | yes | yes | no  |
| united states | streptococcus uberis              | Bacteria | yes | yes | no  |
| united states | neorickettsia helminthoeca        | Bacteria | no  | no  | no  |
| united states | human herpesvirus 3               | Virus    | no  | no  | no  |
| united states | labiosimplex australis            | Helminth | no  | no  | no  |
| united states | simian adenovirus a               | Virus    | no  | no  | no  |
| united states | bacteroides vulgatus              | Bacteria | yes | no  | no  |
| united states | dendritobilharzia pulverulenta    | Helminth | no  | no  | no  |
| united states | porcine parvovirus                | Virus    | no  | no  | no  |
| united states | human adenovirus b                | Virus    | yes | no  | no  |
| united states | haematoloechus floedae            | Helminth | no  | no  | no  |
| united states | tritrichomonas foetus             | Protozoa | no  | no  | no  |
| united states | vaccinia virus                    | Virus    | no  | no  | no  |
| united states | ovine herpesvirus 2               | Virus    | no  | no  | no  |
| united states | mycobacterium haemophilum         | Bacteria | yes | yes | yes |
| united states | yersinia enterocolitica           | Bacteria | yes | yes | yes |
| united states | chlamydomyces felis               | Bacteria | no  | no  | no  |
| united states | pseudomonas putida                | Bacteria | yes | no  | no  |

|               |                                |          |     |     |     |
|---------------|--------------------------------|----------|-----|-----|-----|
| united states | spring viraemia of carp virus  | Virus    | no  | no  | no  |
| united states | truttaedacnitis truttae        | Helminth | no  | no  | no  |
| united states | babesia gibsoni                | Protozoa | yes | yes | no  |
| united states | paragonimus kellicotti         | Helminth | yes | yes | no  |
| united states | reptilian orthoreovirus        | Virus    | no  | no  | no  |
| united states | human herpesvirus 4            | Virus    | no  | no  | no  |
| united states | primate t-lymphotropic virus 2 | Virus    | no  | no  | no  |
| united states | ichthyophonus hoferi           | Others   | no  | no  | no  |
| united states | phyllostomum lacustri          | Helminth | no  | no  | no  |
| united states | influenza b virus              | Virus    | yes | yes | no  |
| united states | equine infectious anemia virus | Virus    | no  | no  | no  |
| united states | francisella tularensis         | Bacteria | yes | yes | yes |
| united states | cordyceps bassiana             | Fungi    | no  | no  | no  |
| united states | proctoeces maculatus           | Helminth | no  | no  | no  |
| united states | cochliobolus spicifer          | Fungi    | no  | no  | no  |
| united states | burkholderia endofungorum      | Bacteria | no  | no  | no  |
| united states | avian paramyxovirus 3          | Virus    | no  | no  | no  |
| united states | trypanosoma theileri           | Protozoa | no  | no  | no  |
| united states | feline panleukopenia virus     | Virus    | no  | no  | no  |
| united states | octomacrum lanceatum           | Helminth | no  | no  | no  |
| united states | bunyamwera virus               | Virus    | yes | yes | no  |
| united states | mammalian orthoreovirus        | Virus    | no  | no  | no  |
| united states | bacillus aquimaris             | Bacteria | no  | no  | no  |
| united states | mycoplasma pneumoniae          | Bacteria | yes | no  | no  |
| united states | bacillus subtilis              | Bacteria | yes | yes | no  |
| united states | paranoplocephala etholeni      | Helminth | no  | no  | no  |
| united states | halocercus invaginatus         | Helminth | no  | no  | no  |
| united states | monoecocestus americanus       | Helminth | no  | no  | no  |
| united states | microbacterium phyllosphaerae  | Bacteria | no  | no  | no  |
| united states | schizophyllum commune          | Fungi    | yes | no  | no  |
| united states | pilobolus longipes             | Fungi    | no  | no  | no  |
| united states | avibacterium gallinarum        | Bacteria | no  | no  | no  |
| united states | pestalotiopsis microspora      | Fungi    | no  | no  | no  |
| united states | pilobolus roridus              | Fungi    | no  | no  | no  |
| united states | pseudomonas fluorescens        | Bacteria | yes | no  | no  |
| united states | hepatitis e virus              | Virus    | yes | yes | yes |
| united states | listeria monocytogenes         | Bacteria | yes | yes | yes |
| united states | edwardsiella ictaluri          | Bacteria | no  | no  | no  |
| united states | enterococcus gallinarum        | Bacteria | yes | no  | no  |
| united states | renibacterium salmoninarum     | Bacteria | no  | no  | no  |
| united states | strongylus vulgaris            | Helminth | no  | no  | no  |
| united states | duck parvovirus                | Virus    | no  | no  | no  |
| united states | polystomoides coronatum        | Helminth | no  | no  | no  |
| united states | avian metapneumovirus          | Virus    | no  | no  | no  |
| united states | haemoproteus elani             | Protozoa | no  | no  | no  |
| united states | ceratobothrium xanthocephalum  | Helminth | no  | no  | no  |
| united states | botryosphaeria dothidea        | Fungi    | no  | no  | no  |
| united states | myxoma virus                   | Virus    | no  | no  | no  |
| united states | powassan virus                 | Virus    | yes | yes | no  |
| united states | shigella flexneri              | Bacteria | yes | yes | no  |

|               |                                       |          |     |     |     |
|---------------|---------------------------------------|----------|-----|-----|-----|
| united states | actinomucor elegans                   | Fungi    | no  | no  | no  |
| united states | mycobacterium tuberculosis            | Bacteria | yes | yes | yes |
| united states | neisseria shayeganii                  | Bacteria | no  | no  | no  |
| united states | clostridium botulinum                 | Bacteria | yes | yes | yes |
| united states | vesicular exanthema of swine virus    | Virus    | no  | no  | no  |
| united states | rhodococcus equi                      | Bacteria | yes | yes | no  |
| united states | vesicular stomatitis indiana virus    | Virus    | yes | yes | no  |
| united states | ehrlichia canis                       | Bacteria | no  | no  | no  |
| united states | human enterovirus a                   | Virus    | yes | no  | no  |
| united states | bothitrema bothi                      | Helminth | no  | no  | no  |
| united states | sphingomonas melonis                  | Bacteria | no  | no  | no  |
| united states | clostridium chauvoei                  | Bacteria | yes | yes | no  |
| united states | seoul virus                           | Virus    | yes | yes | yes |
| united states | actinomyces oris                      | Bacteria | no  | no  | no  |
| united states | bacillus endophyticus                 | Bacteria | no  | no  | no  |
| united states | bovine parainfluenza virus 3          | Virus    | no  | no  | no  |
| united states | aggregatibacter actinomycetemcomitans | Bacteria | no  | no  | no  |
| united states | streptococcus equinus                 | Bacteria | no  | no  | no  |
| united states | murid herpesvirus 1                   | Virus    | no  | no  | no  |
| united states | nucleospora salmonis                  | Fungi    | no  | no  | no  |
| united states | dirofilaria immitis                   | Helminth | yes | yes | no  |
| united states | bayou virus                           | Virus    | yes | yes | no  |
| united states | histomonas meleagridis                | Protozoa | no  | no  | no  |
| united states | hepatitis c virus                     | Virus    | yes | no  | yes |
| united states | bacillus firmus                       | Bacteria | no  | no  | no  |
| united states | murine pneumonia virus                | Virus    | no  | no  | no  |
| united states | mycobacterium fortuitum               | Bacteria | no  | no  | no  |
| united states | colletotrichum truncatum              | Fungi    | no  | no  | no  |
| united states | human papillomavirus 18               | Virus    | no  | no  | no  |
| united states | measles virus                         | Virus    | yes | yes | yes |
| united states | human rhinovirus b                    | Virus    | yes | no  | no  |
| united states | streptococcus lutetiensis             | Bacteria | no  | no  | no  |
| united states | klebsiella oxytoca                    | Bacteria | yes | yes | no  |
| united states | hapalotrema pambanensis               | Helminth | no  | no  | no  |
| united states | fasciola gigantica                    | Helminth | yes | yes | no  |
| united states | lawsonia intracellularis              | Bacteria | no  | no  | no  |
| united states | rubella virus                         | Virus    | yes | no  | no  |
| united states | learedius learedi                     | Helminth | no  | no  | no  |
| united states | beak and feather disease virus        | Virus    | no  | no  | no  |
| united states | pseudomonas aeruginosa                | Bacteria | yes | yes | yes |
| united states | human parainfluenza virus 1           | Virus    | yes | no  | no  |
| united states | santee-cooper ranavirus               | Virus    | no  | no  | no  |
| united states | aeromonas bestiarum                   | Bacteria | no  | no  | no  |
| united states | coprinopsis cinerea                   | Fungi    | no  | no  | no  |
| united states | aliivibrio fischeri                   | Bacteria | no  | no  | no  |
| united states | equid herpesvirus 1                   | Virus    | no  | no  | no  |
| united states | human rhinovirus c                    | Virus    | no  | no  | no  |
| united states | actinomyces naeslundii                | Bacteria | yes | yes | no  |
| united states | rickettsia typhi                      | Bacteria | yes | yes | no  |
| united states | rabbit hemorrhagic disease virus      | Virus    | no  | no  | no  |

|               |                                   |          |     |     |     |
|---------------|-----------------------------------|----------|-----|-----|-----|
| united states | rabies virus                      | Virus    | yes | yes | yes |
| united states | anoplocephala perfoliata          | Helminth | no  | no  | no  |
| united states | meyerozyma guilliermondii         | Fungi    | no  | no  | no  |
| united states | anaplasma phagocytophilum         | Bacteria | no  | no  | no  |
| united states | lecythophora hoffmannii           | Fungi    | yes | no  | no  |
| united states | cryptosporidium bovis             | Protozoa | no  | no  | no  |
| united states | helicobacter marmotae             | Bacteria | no  | no  | no  |
| united states | hepatitis a virus                 | Virus    | yes | yes | yes |
| united states | anoplocephaloides kontrimavichusi | Helminth | no  | no  | no  |
| united states | bovine herpesvirus 5              | Virus    | no  | no  | no  |
| united states | acanthamoeba polyphaga            | Protozoa | yes | no  | no  |
| united states | acanthobothrium margieae          | Helminth | no  | no  | no  |
| united states | avian leukosis virus              | Virus    | no  | no  | no  |
| united states | paranucleospora theridion         | Fungi    | no  | no  | no  |
| united states | didelphostrongylus hayesi         | Helminth | no  | no  | no  |
| united states | campylobacter coli                | Bacteria | yes | yes | no  |
| united states | moraxella bovoculi                | Bacteria | no  | no  | no  |
| united states | fowl adenovirus e                 | Virus    | no  | no  | no  |
| united states | chlamydophila caviae              | Bacteria | no  | no  | no  |
| united states | phialemonium curvatum             | Fungi    | yes | yes | no  |
| united states | vibrio tasmaniensis               | Bacteria | no  | no  | no  |
| united states | duck hepatitis b virus            | Virus    | no  | no  | no  |
| united states | haematoloechus varioplexus        | Helminth | no  | no  | no  |
| united states | renifer kansensis                 | Helminth | no  | no  | no  |
| united states | strongyloides westeri             | Helminth | yes | yes | no  |
| united states | rickettsia akari                  | Bacteria | yes | yes | no  |
| united states | staphylococcus hominis            | Bacteria | no  | no  | no  |
| united states | aspergillus flavipes              | Fungi    | yes | no  | no  |
| united states | sinorhizobium medicae             | Bacteria | no  | no  | no  |
| united states | mycoplasma hyopneumoniae          | Bacteria | no  | no  | no  |
| united states | mycoplasma iguanae                | Bacteria | no  | no  | no  |
| united states | reticuloendotheliosis virus       | Virus    | no  | no  | no  |
| united states | burkholderia cepacia              | Bacteria | yes | no  | no  |
| united states | stenotrophomonas maltophilia      | Bacteria | no  | no  | no  |
| united states | trypanosoma cruzi                 | Protozoa | yes | yes | yes |
| united states | rhabdias ranae                    | Helminth | no  | no  | no  |
| united states | stephanostomum interruptum        | Helminth | no  | no  | no  |
| united states | bartonella clarridgeiae           | Bacteria | no  | no  | no  |
| united states | vibrio crassostreae               | Bacteria | no  | no  | no  |
| united states | equine rhinitis b virus           | Virus    | no  | no  | no  |
| united states | besnoitia bennetti                | Protozoa | no  | no  | no  |
| united states | rickettsia felis                  | Bacteria | yes | yes | no  |
| united states | human herpesvirus 5               | Virus    | yes | no  | yes |
| united states | fusarium subglutinans             | Fungi    | yes | no  | no  |
| united states | tetrabothrius forsteri            | Helminth | no  | no  | no  |
| united states | gibberella intermedia             | Fungi    | no  | no  | no  |
| united states | bovine papular stomatitis virus   | Virus    | yes | yes | no  |
| united states | bacillus cereus                   | Bacteria | yes | yes | no  |
| united states | loma salmonae                     | Fungi    | no  | no  | no  |
| united states | pasteurella multocida             | Bacteria | yes | yes | no  |



|               |                                     |          |     |     |     |
|---------------|-------------------------------------|----------|-----|-----|-----|
| united states | <i>pseudomonas stutzeri</i>         | Bacteria | yes | no  | no  |
| united states | mouse parvovirus 1                  | Virus    | no  | no  | no  |
| united states | cyprinid herpesvirus 2              | Virus    | no  | no  | no  |
| united states | <i>vasotrema robustum</i>           | Helminth | no  | no  | no  |
| united states | <i>prosobothrium armigerum</i>      | Helminth | no  | no  | no  |
| united states | <i>scedosporium aurantiacum</i>     | Fungi    | no  | no  | no  |
| united states | <i>enterobius vermicularis</i>      | Helminth | yes | yes | no  |
| united states | <i>bartonella henselae</i>          | Bacteria | yes | yes | no  |
| united states | <i>escherichia coli</i>             | Bacteria | yes | yes | yes |
| united states | <i>parascaris equorum</i>           | Helminth | yes | yes | no  |
| united states | <i>rickettsia prowazekii</i>        | Bacteria | yes | yes | yes |
| united states | <i>pseudoterranova azarasi</i>      | Helminth | no  | no  | no  |
| united states | <i>cronobacter malonaticus</i>      | Bacteria | no  | no  | no  |
| united states | <i>helicobacter pylori</i>          | Bacteria | yes | yes | no  |
| united states | <i>schistocephalus solidus</i>      | Helminth | yes | yes | no  |
| united states | columbid herpesvirus 1              | Virus    | no  | no  | no  |
| united states | <i>vibrio harveyi</i>               | Bacteria | no  | no  | no  |
| united states | <i>cryptosporidium meleagridis</i>  | Protozoa | no  | no  | no  |
| united states | <i>glythelmins brownorumae</i>      | Helminth | no  | no  | no  |
| united states | norwalk virus                       | Virus    | yes | no  | yes |
| united states | <i>selinia pulchra</i>              | Fungi    | no  | no  | no  |
| united states | <i>glythelmins californiensis</i>   | Helminth | no  | no  | no  |
| united states | <i>marsipometra hastata</i>         | Helminth | no  | no  | no  |
| united states | <i>theileria buffeli</i>            | Protozoa | no  | no  | no  |
| united states | <i>glythelmins pennsylvaniensis</i> | Helminth | no  | no  | no  |
| united states | <i>cryptosporidium muris</i>        | Protozoa | no  | no  | no  |
| united states | <i>glythelmins quieta</i>           | Helminth | no  | no  | no  |
| united states | <i>mycobacterium kansasii</i>       | Bacteria | yes | yes | no  |
| united states | <i>bartonella washoensis</i>        | Bacteria | no  | no  | no  |
| united states | <i>cladosporium bruhnei</i>         | Fungi    | no  | no  | no  |
| united states | <i>fundulotrema stableri</i>        | Helminth | no  | no  | no  |
| united states | <i>chlamydomyxa pneumoniae</i>      | Bacteria | yes | yes | no  |
| united states | <i>epicoccum nigrum</i>             | Fungi    | no  | no  | no  |
| united states | <i>kluveria ascorbata</i>           | Bacteria | yes | yes | no  |
| united states | <i>penicillium brevicompactum</i>   | Fungi    | no  | no  | no  |
| united states | <i>mesocestoides corti</i>          | Helminth | no  | no  | no  |
| united states | <i>gnathostoma spinigerum</i>       | Helminth | yes | yes | no  |
| united states | <i>aspergillus niger</i>            | Fungi    | yes | yes | no  |
| united states | human herpesvirus 8                 | Virus    | yes | no  | yes |
| united states | <i>haematoloechus breviplexus</i>   | Helminth | no  | no  | no  |
| united states | <i>chaetomidium arxii</i>           | Fungi    | no  | no  | no  |
| united states | <i>aureobasidium pullulans</i>      | Fungi    | yes | no  | no  |
| united states | <i>proteus mirabilis</i>            | Bacteria | yes | yes | no  |
| united states | <i>chaetomium brasiliense</i>       | Fungi    | no  | no  | no  |
| united states | human herpesvirus 1                 | Virus    | no  | no  | no  |
| united states | murine coronavirus                  | Virus    | no  | no  | no  |
| united states | <i>spraguea lophii</i>              | Fungi    | no  | no  | no  |
| united states | <i>brachylaima virginianum</i>      | Helminth | no  | no  | no  |
| united states | <i>mycoplasma synoviae</i>          | Bacteria | no  | no  | no  |
| united states | <i>campylobacter lari</i>           | Bacteria | yes | yes | no  |

|               |                                         |          |     |     |     |
|---------------|-----------------------------------------|----------|-----|-----|-----|
| united states | simian hemorrhagic fever virus          | Virus    | no  | no  | no  |
| united states | infectious salmon anemia virus          | Virus    | no  | no  | no  |
| united states | enterococcus faecalis                   | Bacteria | yes | yes | yes |
| united states | anisakis simplex                        | Helminth | yes | yes | yes |
| united states | brachyspira alvinipulli                 | Bacteria | no  | no  | no  |
| united states | callitrichine herpesvirus 3             | Virus    | no  | no  | no  |
| united states | turkey astrovirus                       | Virus    | no  | no  | no  |
| united states | hapalotrema mistroides                  | Helminth | no  | no  | no  |
| united states | neoheterobothrium affine                | Helminth | no  | no  | no  |
| united states | brachyspira canis                       | Bacteria | no  | no  | no  |
| united states | kotorella pronosoma                     | Helminth | no  | no  | no  |
| united states | infectious spleen and kidney necrosis v | Virus    | no  | no  | no  |
| united states | ochrobactrum anthropi                   | Bacteria | yes | no  | no  |
| united states | leishmania mexicana                     | Protozoa | yes | yes | no  |
| united states | ornithobilharzia canaliculata           | Helminth | no  | no  | no  |
| united states | trypanosoma bennetti                    | Protozoa | no  | no  | no  |
| united states | human coronavirus nl63                  | Virus    | no  | no  | no  |
| united states | babesia canis                           | Protozoa | no  | no  | no  |
| united states | brachyspira innocens                    | Bacteria | no  | no  | no  |
| united states | equine rhinitis a virus                 | Virus    | no  | no  | no  |
| united states | enterobacter asburiae                   | Bacteria | yes | yes | no  |
| united states | suid herpesvirus 1                      | Virus    | no  | no  | no  |
| united states | acanthamoeba castellanii                | Protozoa | no  | no  | no  |
| united states | besnoitia darlingi                      | Protozoa | no  | no  | no  |
| united states | dracunculus insignis                    | Helminth | yes | yes | no  |
| united states | gymnorhynchus isuri                     | Helminth | no  | no  | no  |
| united states | babesia conradae                        | Protozoa | no  | no  | no  |
| united states | otostrongylus circumlitus               | Helminth | no  | no  | no  |
| united states | woodchuck hepatitis virus               | Virus    | no  | no  | no  |
| united states | enterobacter cancerogenus               | Bacteria | yes | yes | no  |
| united states | cryptosporidium saurophilum             | Protozoa | no  | no  | no  |
| united states | malassezia furfur                       | Fungi    | yes | yes | no  |
| united states | lecythophora mutabilis                  | Fungi    | yes | no  | no  |
| united states | balamuthia mandrillaris                 | Protozoa | yes | no  | no  |
| united states | penicillium marneffeii                  | Fungi    | yes | yes | yes |
| united states | enterococcus faecium                    | Bacteria | yes | yes | yes |
| united states | chlamydomyces psittaci                  | Bacteria | yes | yes | no  |
| united states | trypanosoma corvi                       | Protozoa | no  | no  | no  |
| united states | betacoronavirus 1                       | Virus    | no  | no  | no  |
| united states | echinococcus granulosus                 | Helminth | yes | yes | yes |
| united states | cryptosporidium wrairi                  | Protozoa | no  | no  | no  |
| united states | oxyuris equi                            | Helminth | no  | no  | no  |
| united states | neoscytalidium dimidiatum               | Fungi    | no  | no  | no  |
| united states | listeria seeligeri                      | Bacteria | yes | yes | no  |
| united states | sarcocystis felis                       | Protozoa | no  | no  | no  |
| united states | campylobacter fetus                     | Bacteria | yes | yes | yes |
| united states | fowlpox virus                           | Virus    | no  | no  | no  |
| united states | vibrio vulnificus                       | Bacteria | yes | yes | yes |
| united states | enterococcus hirae                      | Bacteria | yes | yes | no  |
| united states | brevibacillus agri                      | Bacteria | no  | no  | no  |

|               |                                      |          |     |     |     |
|---------------|--------------------------------------|----------|-----|-----|-----|
| united states | torque teno virus 10                 | Virus    | no  | no  | no  |
| united states | trichinella murrelli                 | Helminth | no  | no  | no  |
| united states | pneumocystis carinii                 | Fungi    | yes | yes | yes |
| united states | listonella anguillarum               | Bacteria | no  | no  | no  |
| united states | cupriavidus taiwanensis              | Bacteria | no  | no  | no  |
| united states | human adenovirus c                   | Virus    | yes | no  | no  |
| united states | zalophotrema hepaticum               | Helminth | no  | no  | no  |
| united states | influenza c virus                    | Virus    | yes | yes | no  |
| united states | spathebothrium simplex               | Helminth | no  | no  | no  |
| united states | aspergillus sydowii                  | Fungi    | no  | no  | no  |
| united states | bartonella durdenii                  | Bacteria | no  | no  | no  |
| united states | cryptosporidium parvum               | Protozoa | yes | yes | yes |
| united states | neurospora crassa                    | Fungi    | no  | no  | no  |
| united states | newbury-1 virus                      | Virus    | no  | no  | no  |
| united states | shigella boydii                      | Bacteria | yes | yes | no  |
| united states | mycobacterium chesapeaki             | Bacteria | no  | no  | no  |
| united states | cyclospora cayetanensis              | Protozoa | yes | yes | yes |
| united states | human papillomavirus 16              | Virus    | no  | no  | no  |
| united states | volepox virus                        | Virus    | no  | no  | no  |
| united states | mouse mammary tumor virus            | Virus    | no  | no  | no  |
| united states | weeksella virosa                     | Bacteria | no  | no  | no  |
| united states | corynebacterium diphtheriae          | Bacteria | yes | no  | yes |
| united states | mycobacterium conceptionense         | Bacteria | no  | no  | no  |
| united states | enterorhabdus caecimuris             | Bacteria | no  | no  | no  |
| united states | pilobolus kleinii                    | Fungi    | no  | no  | no  |
| united states | acremonium strictum                  | Fungi    | yes | no  | no  |
| united states | human adenovirus e                   | Virus    | yes | no  | no  |
| united states | ehrlichia ruminantium                | Bacteria | no  | no  | no  |
| united states | schizorchis caballeroi               | Helminth | no  | no  | no  |
| united states | haemophilus ducreyi                  | Bacteria | yes | no  | yes |
| united states | diplomonorchis leiostomi             | Helminth | no  | no  | no  |
| united states | lactobacillus farciminis             | Bacteria | no  | no  | no  |
| united states | brucella canis                       | Bacteria | yes | yes | no  |
| united states | streptococcus pneumoniae             | Bacteria | yes | yes | yes |
| united states | japanese encephalitis virus          | Virus    | yes | yes | yes |
| united states | corynebacterium pseudodiphtheriticum | Bacteria | no  | no  | no  |
| united states | torque teno sus virus 2              | Virus    | no  | no  | no  |
| united states | enterococcus casseliflavus           | Bacteria | yes | no  | no  |
| united states | cystoisospora rivolta                | Protozoa | no  | no  | no  |
| united states | pantoea conspicua                    | Bacteria | no  | no  | no  |
| united states | whitewater arroyo virus              | Virus    | no  | no  | no  |
| united states | lymphocytic choriomeningitis virus   | Virus    | yes | yes | no  |
| united states | uncinaria stenocephala               | Helminth | yes | yes | no  |
| united states | arthroderma grubyi                   | Fungi    | no  | no  | no  |
| united states | candida zeylanoides                  | Fungi    | yes | no  | no  |
| united states | lactobacillus fermentum              | Bacteria | no  | no  | no  |
| united states | corynebacterium pseudotuberculosis   | Bacteria | yes | yes | no  |
| united states | enterococcus durans                  | Bacteria | yes | yes | no  |
| united states | heronimus mollis                     | Helminth | no  | no  | no  |
| united states | teladorsagia circumcincta            | Helminth | yes | yes | no  |

|               |                               |          |     |     |     |
|---------------|-------------------------------|----------|-----|-----|-----|
| united states | cervid herpesvirus 2          | Virus    | no  | no  | no  |
| united states | achromobacter xylooxidans     | Bacteria | yes | no  | no  |
| united states | neoparamoeba perurans         | Protozoa | no  | no  | no  |
| united states | nematodirus battus            | Helminth | no  | no  | no  |
| united states | plasmodium elongatum          | Protozoa | no  | no  | no  |
| united states | brucella ovis                 | Bacteria | no  | no  | no  |
| united states | micrococcus luteus            | Bacteria | no  | no  | no  |
| united states | raccoonpox virus              | Virus    | no  | no  | no  |
| united states | nagmia floridensis            | Helminth | no  | no  | no  |
| united states | falcon adenovirus a           | Virus    | no  | no  | no  |
| united states | chaetomidium cephalothecoides | Fungi    | no  | no  | no  |
| united states | nanophyetus salminicola       | Helminth | no  | no  | no  |
| united states | contraeaecum multipapillatum  | Helminth | no  | no  | no  |
| united states | austrobilharzia variglandis   | Helminth | no  | no  | no  |
| united states | chicken anemia virus          | Virus    | no  | no  | no  |
| united states | fasciola hepatica             | Helminth | yes | yes | no  |
| united states | bacillus thuringiensis        | Bacteria | yes | no  | no  |
| united states | flavobacterium columnare      | Bacteria | no  | no  | no  |
| united states | murine leukemia virus         | Virus    | no  | no  | no  |
| united states | staphylococcus aureus         | Bacteria | yes | yes | yes |
| united states | simian foamy virus            | Virus    | no  | no  | no  |
| united states | histophilus somni             | Bacteria | no  | no  | no  |
| united states | streptococcus pyogenes        | Bacteria | yes | yes | yes |
| united states | salmonella enterica           | Bacteria | no  | no  | no  |
| united states | troglostrongylus wilsoni      | Helminth | no  | no  | no  |
| united states | phialemonium obovatum         | Fungi    | yes | yes | no  |
| united states | phialemonium dimorphosporum   | Fungi    | no  | no  | no  |
| united states | hapalotrema mehrai            | Helminth | no  | no  | no  |
| united states | west nile virus               | Virus    | yes | yes | yes |
| united states | bovine foamy virus            | Virus    | no  | no  | no  |
| united states | muellerius capillaris         | Helminth | no  | no  | no  |
| united states | debaryomyces hansenii         | Fungi    | no  | no  | no  |
| united states | marituba virus                | Virus    | yes | yes | no  |
| united states | serratia plymuthica           | Bacteria | yes | no  | no  |
| united states | deerpox virus w-848-83        | Virus    | no  | no  | no  |
| united states | cryptosporidium andersoni     | Protozoa | no  | no  | no  |
| united states | human parainfluenza virus 2   | Virus    | yes | no  | no  |
| united states | lissorachus kritskyi          | Helminth | no  | no  | no  |
| united states | ruminococcus flavefaciens     | Bacteria | no  | no  | no  |
| united states | parabacteroides distasonis    | Bacteria | no  | no  | no  |
| united states | neospora caninum              | Protozoa | no  | no  | no  |
| united states | hunterella nodulosa           | Helminth | no  | no  | no  |
| united states | cokeromyces recurvatus        | Fungi    | no  | no  | no  |
| united states | brachyspira murdochii         | Bacteria | no  | no  | no  |
| united states | human parainfluenza virus 4   | Virus    | yes | no  | no  |
| united states | photobacterium damsela        | Bacteria | yes | yes | no  |
| united states | delftia acidovorans           | Bacteria | yes | no  | no  |
| united states | setosphaeria rostrata         | Fungi    | yes | no  | no  |
| united states | clostridium septicum          | Bacteria | yes | yes | no  |
| united states | kabatana newberryi            | Fungi    | no  | no  | no  |

|               |                                      |          |     |     |     |
|---------------|--------------------------------------|----------|-----|-----|-----|
| united states | <i>trichinella spiralis</i>          | Helminth | yes | yes | yes |
| united states | <i>pseudallescheria angusta</i>      | Fungi    | no  | no  | no  |
| united states | fowl adenovirus d                    | Virus    | no  | no  | no  |
| united states | <i>ambystoma tigrinum virus</i>      | Virus    | no  | no  | no  |
| united states | <i>spinitectus carolini</i>          | Helminth | no  | no  | no  |
| united states | <i>trichostrongylus axei</i>         | Helminth | yes | yes | no  |
| united states | <i>emericella nidulans</i>           | Fungi    | no  | no  | no  |
| united states | ectromelia virus                     | Virus    | no  | no  | no  |
| united states | <i>borrelia miyamotoi</i>            | Bacteria | no  | no  | no  |
| united states | <i>lactobacillus plantarum</i>       | Bacteria | no  | no  | no  |
| united states | primate t-lymphotropic virus 1       | Virus    | no  | no  | no  |
| united states | <i>aspergillus terreus</i>           | Fungi    | no  | no  | no  |
| united states | sapporo virus                        | Virus    | no  | no  | no  |
| united states | <i>scedosporium prolificans</i>      | Fungi    | yes | no  | yes |
| united states | <i>bacillus licheniformis</i>        | Bacteria | yes | yes | no  |
| united states | <i>pseudallescheria boydii</i>       | Fungi    | no  | no  | no  |
| united states | <i>sarcocystis falcatula</i>         | Protozoa | no  | no  | no  |
| united states | <i>parelaphostrongylus tenuis</i>    | Helminth | no  | no  | no  |
| united states | <i>skrjabingylus chitwoodorum</i>    | Helminth | no  | no  | no  |
| united states | <i>siphodera vinaledwardsii</i>      | Helminth | no  | no  | no  |
| united states | <i>staphylococcus epidermidis</i>    | Bacteria | yes | yes | yes |
| united states | venezuelan equine encephalitis virus | Virus    | yes | yes | yes |
| united states | <i>hapalotrema postorchis</i>        | Helminth | no  | no  | no  |
| united states | <i>bartonella tribocorum</i>         | Bacteria | no  | no  | no  |
| united states | human adenovirus g                   | Virus    | no  | no  | no  |
| united states | <i>paecilomyces lilacinus</i>        | Fungi    | yes | yes | no  |
| united states | <i>rhabdias bakeri</i>               | Helminth | no  | no  | no  |
| united states | <i>enterococcus mundtii</i>          | Bacteria | yes | no  | no  |
| united states | <i>bartonella volans</i>             | Bacteria | no  | no  | no  |
| united states | jc polyomavirus                      | Virus    | no  | no  | no  |
| united states | <i>cladosporium oxysporum</i>        | Fungi    | yes | no  | no  |
| united states | bovine leukemia virus                | Virus    | no  | no  | no  |
| united states | <i>haemonchus contortus</i>          | Helminth | yes | yes | no  |
| united states | <i>fusarium solani</i>               | Fungi    | yes | yes | yes |
| united states | <i>trichinella pseudospiralis</i>    | Helminth | yes | yes | no  |
| united states | <i>aspergillus flavus</i>            | Fungi    | no  | no  | no  |
| united states | <i>alternaria alternata</i>          | Fungi    | yes | yes | no  |
| united states | <i>ehrlichia ewingii</i>             | Bacteria | yes | yes | yes |
| united states | torque teno sus virus 1              | Virus    | no  | no  | no  |
| united states | <i>rhinoptericola megacantha</i>     | Helminth | no  | no  | no  |
| united states | <i>anaplasma marginale</i>           | Bacteria | no  | no  | no  |
| united states | <i>aspergillus versicolor</i>        | Fungi    | yes | no  | no  |
| united states | <i>bothriocephalus acheilognathi</i> | Helminth | no  | no  | no  |
| united states | <i>botryosphaeria rhodina</i>        | Fungi    | no  | no  | no  |
| united states | <i>babesia bovis</i>                 | Protozoa | yes | yes | no  |
| united states | <i>cathetocephalus thatcheri</i>     | Helminth | no  | no  | no  |
| united states | <i>clinostomum marginatum</i>        | Helminth | no  | no  | no  |
| united states | <i>clitobothrium montaukensis</i>    | Helminth | no  | no  | no  |
| united states | <i>rickettsia massiliae</i>          | Bacteria | yes | yes | no  |
| united states | <i>trichoderma longibrachiatum</i>   | Fungi    | no  | no  | no  |

|               |                                       |          |     |     |     |
|---------------|---------------------------------------|----------|-----|-----|-----|
| united states | vibrio parahaemolyticus               | Bacteria | yes | yes | yes |
| united states | brucella abortus                      | Bacteria | yes | yes | no  |
| united states | rhizopus microsporus                  | Fungi    | yes | yes | no  |
| united states | macacine herpesvirus 3                | Virus    | no  | no  | no  |
| united states | avibacterium paragallinarum           | Bacteria | no  | no  | no  |
| united states | pseudoterranova bulbosa               | Helminth | no  | no  | no  |
| united states | eimeria auritusi                      | Protozoa | no  | no  | no  |
| united states | pseudomonas luteola                   | Bacteria | no  | no  | no  |
| united states | bartonella schoenbuchensis            | Bacteria | no  | no  | no  |
| united states | cephalotheca foveolata                | Fungi    | no  | no  | no  |
| united states | pseudallescheria ellipsoidea          | Fungi    | no  | no  | no  |
| united states | chandlerella quiscali                 | Helminth | no  | no  | no  |
| united states | proteocephalus ambloplitis            | Helminth | no  | no  | no  |
| united states | mycoplasma canis                      | Bacteria | no  | no  | no  |
| united states | human enterovirus b                   | Virus    | yes | no  | yes |
| united states | rotavirus c                           | Virus    | yes | yes | yes |
| united states | torynurus convolutus                  | Helminth | no  | no  | no  |
| united states | torque teno virus 9                   | Virus    | no  | no  | no  |
| united states | anisakis typica                       | Helminth | no  | no  | no  |
| united states | heron hepatitis b virus               | Virus    | no  | no  | no  |
| united states | crenosoma mephitidis                  | Helminth | no  | no  | no  |
| united states | ruminococcus albus                    | Bacteria | no  | no  | no  |
| united states | paecilomyces variotii                 | Fungi    | yes | yes | no  |
| united states | simian immunodeficiency virus         | Virus    | no  | no  | no  |
| united states | trichomonas vaginalis                 | Protozoa | yes | no  | yes |
| united states | taenia pisiformis                     | Helminth | no  | no  | no  |
| united states | vesicular stomatitis new jersey virus | Virus    | no  | no  | no  |
| united states | acanthamoeba culbertsoni              | Protozoa | yes | yes | no  |
| united states | prevotella maculosa                   | Bacteria | no  | no  | no  |
| united states | human papillomavirus 53               | Virus    | no  | no  | no  |
| united states | ostertagia ostertagi                  | Helminth | yes | yes | no  |
| united states | aeromonas veronii                     | Bacteria | yes | no  | yes |
| united states | dasyrhynchus variouncinatus           | Helminth | no  | no  | no  |
| united states | gyrocotyle rugosa                     | Helminth | no  | no  | no  |
| united states | cryptosporidium hominis               | Protozoa | yes | no  | yes |
| united states | rotavirus a                           | Virus    | yes | yes | yes |
| united states | equid herpesvirus 5                   | Virus    | no  | no  | no  |
| united states | aerococcus viridans                   | Bacteria | yes | no  | no  |
| united states | streptococcus gallolyticus            | Bacteria | no  | no  | no  |
| united states | dictyostelium discoideum              | Protozoa | no  | no  | no  |
| united states | equine adenovirus a                   | Virus    | no  | no  | no  |
| united states | chlamydophila abortus                 | Bacteria | no  | no  | no  |
| united states | haematoloechus medioplexus            | Helminth | no  | no  | no  |
| united states | streptococcus agalactiae              | Bacteria | yes | yes | no  |
| united states | homalometron armatum                  | Helminth | no  | no  | no  |
| united states | libyostrogylus douglasi               | Helminth | no  | no  | no  |
| united states | neodiplorchis scaphiopi               | Helminth | no  | no  | no  |
| united states | dengue virus                          | Virus    | no  | no  | no  |
| united states | haematoloechus parviplexus            | Helminth | no  | no  | no  |
| united states | macaque simian foamy virus            | Virus    | no  | no  | no  |

|               |                                       |          |     |     |     |
|---------------|---------------------------------------|----------|-----|-----|-----|
| united states | spirorchis artericola                 | Helminth | no  | no  | no  |
| united states | anaplasma bovis                       | Bacteria | no  | no  | no  |
| united states | serratia marcescens                   | Bacteria | yes | yes | yes |
| united states | bacillus mojavensis                   | Bacteria | no  | no  | no  |
| united states | cytauxzoon felis                      | Protozoa | no  | no  | no  |
| united states | macroderoides typicus                 | Helminth | no  | no  | no  |
| united states | bear canyon virus                     | Virus    | no  | no  | no  |
| united states | penicillium citrinum                  | Fungi    | yes | no  | no  |
| united states | ophiotaenia grandis                   | Helminth | no  | no  | no  |
| united states | fusarium sacchari                     | Fungi    | yes | no  | no  |
| united states | human adenovirus a                    | Virus    | yes | no  | no  |
| united states | echinococcus multilocularis           | Helminth | yes | yes | no  |
| united states | penicillium commune                   | Fungi    | yes | no  | no  |
| united states | aeromonas hydrophila                  | Bacteria | yes | yes | yes |
| united states | bilophila wadsworthia                 | Bacteria | yes | no  | no  |
| united states | cryptosporidium baileyi               | Protozoa | no  | no  | no  |
| united states | elephantid herpesvirus 1              | Virus    | no  | no  | no  |
| united states | mycobacterium chelonae                | Bacteria | yes | yes | no  |
| united states | sin nombre virus                      | Virus    | yes | yes | yes |
| united states | hepatitis b virus                     | Virus    | yes | no  | yes |
| united states | pseudobutyrvibrio xylanivorans        | Bacteria | no  | no  | no  |
| united states | foot-and-mouth disease virus          | Virus    | no  | no  | no  |
| united states | cryptosporidium ryanae                | Protozoa | no  | no  | no  |
| united states | scedosporium apiospermum              | Fungi    | no  | no  | no  |
| united states | human adenovirus d                    | Virus    | yes | no  | no  |
| united states | highlands j virus                     | Virus    | no  | no  | no  |
| united states | xanthomonas campestris                | Bacteria | no  | no  | no  |
| united states | severe acute respiratory syndrome-rel | Virus    | no  | no  | no  |
| united states | coccidioides posadasii                | Fungi    | no  | no  | no  |
| united states | variovorax paradoxus                  | Bacteria | no  | no  | no  |
| united states | arthrographis kalrae                  | Fungi    | no  | no  | no  |
| united states | paranoplocephala jarrelli             | Helminth | no  | no  | no  |
| united states | coccidioides immitis                  | Fungi    | yes | yes | yes |
| united states | macacine herpesvirus 1                | Virus    | no  | no  | no  |
| united states | leucocytozoon dubreuilii              | Protozoa | no  | no  | no  |
| united states | cochliobolus australiensis            | Fungi    | no  | no  | no  |
| united states | strongyloides stercoralis             | Helminth | yes | yes | yes |
| united states | gigantobilharzia huronensis           | Helminth | no  | no  | no  |
| united states | giardia intestinalis                  | Protozoa | no  | no  | no  |
| united states | plasmodium vivax                      | Protozoa | yes | no  | yes |
| united states | metastrongylus salmi                  | Helminth | no  | no  | no  |
| united states | chalastospora gossypii                | Fungi    | no  | no  | no  |
| united states | spirorchis scripta                    | Helminth | no  | no  | no  |
| united states | fusarium oxysporum                    | Fungi    | yes | no  | yes |
| united states | mixonybelinia lepturi                 | Helminth | no  | no  | no  |
| united states | cercopithecine herpesvirus 5          | Virus    | no  | no  | no  |
| united states | onchocerca lupi                       | Helminth | no  | no  | no  |
| united states | bordetella pertussis                  | Bacteria | yes | no  | yes |
| united states | macroderoides spiniferus              | Helminth | no  | no  | no  |
| united states | sphyranura oligorchis                 | Helminth | no  | no  | no  |

|               |                                      |          |     |     |     |
|---------------|--------------------------------------|----------|-----|-----|-----|
| united states | auridistomum chelydrae               | Helminth | no  | no  | no  |
| united states | pseudomonas otitidis                 | Bacteria | no  | no  | no  |
| united states | avian orthoreovirus                  | Virus    | no  | no  | no  |
| united states | simian virus 12                      | Virus    | no  | no  | no  |
| united states | dollfusiella tenuispinis             | Helminth | no  | no  | no  |
| united states | streptococcus mutans                 | Bacteria | yes | no  | no  |
| united states | sulcascaris sulcata                  | Helminth | no  | no  | no  |
| united states | gallid herpesvirus 2                 | Virus    | no  | no  | no  |
| united states | echinobothrium bonasum               | Helminth | no  | no  | no  |
| united states | candida parapsilosis                 | Fungi    | yes | yes | no  |
| united states | anisakis brevispiculata              | Helminth | no  | no  | no  |
| united states | agrobacterium tumefaciens            | Bacteria | no  | no  | no  |
| united states | cyprinid herpesvirus 3               | Virus    | no  | no  | no  |
| united states | bartonella quintana                  | Bacteria | yes | no  | no  |
| united states | rhodococcus erythropolis             | Bacteria | yes | no  | no  |
| united states | maritrema prosthometra               | Helminth | no  | no  | no  |
| united states | brevundimonas vesicularis            | Bacteria | yes | no  | no  |
| united states | enterocytozoon bieneusi              | Fungi    | yes | no  | yes |
| united states | angiostrongylus cantonensis          | Helminth | yes | no  | no  |
| united states | mesorhizobium loti                   | Bacteria | no  | no  | no  |
| united states | babesia duncani                      | Protozoa | yes | yes | no  |
| united states | candida albicans                     | Fungi    | yes | yes | yes |
| united states | hammondia heydorni                   | Protozoa | no  | no  | no  |
| united states | anaplasma ovis                       | Bacteria | no  | no  | no  |
| united states | bacteroides coprosuis                | Bacteria | no  | no  | no  |
| united states | feline calicivirus                   | Virus    | no  | no  | no  |
| united states | baylisascaris procyonis              | Helminth | yes | yes | no  |
| united states | plectosphaerella cucumerina          | Fungi    | no  | no  | no  |
| united states | loma psittaca                        | Fungi    | no  | no  | no  |
| united states | rickettsia rickettsii                | Bacteria | yes | yes | no  |
| united states | moraxella catarrhalis                | Bacteria | no  | no  | no  |
| united states | equine arteritis virus               | Virus    | no  | no  | no  |
| united states | acinetobacter baumannii              | Bacteria | yes | no  | no  |
| united states | porphyromonas levii                  | Bacteria | yes | no  | no  |
| united states | streptococcus canis                  | Bacteria | yes | yes | no  |
| united states | mycobacterium arupense               | Bacteria | no  | no  | no  |
| united states | uncinaria lucasi                     | Helminth | no  | no  | no  |
| united states | semliki forest virus                 | Virus    | yes | yes | no  |
| united states | batrachochytrium dendrobatidis       | Fungi    | no  | no  | no  |
| united states | haematoloechus longiplexus           | Helminth | no  | no  | no  |
| united states | canine distemper virus               | Virus    | no  | no  | no  |
| united states | fascioloides magna                   | Helminth | no  | no  | no  |
| united states | bacteroides fragilis                 | Bacteria | yes | yes | no  |
| united states | malassezia sympodialis               | Fungi    | yes | yes | no  |
| united states | saccharomyces cerevisiae             | Fungi    | yes | no  | no  |
| united states | borrelia hermsii                     | Bacteria | yes | yes | no  |
| united states | ascaris suum                         | Helminth | yes | yes | no  |
| united states | borrelia lonestari                   | Bacteria | no  | no  | no  |
| united states | caprine arthritis encephalitis virus | Virus    | no  | no  | no  |
| united states | candida glabrata                     | Fungi    | yes | yes | yes |



|               |                               |          |     |     |     |
|---------------|-------------------------------|----------|-----|-----|-----|
| united states | paramacroderoides kinsellai   | Helminth | no  | no  | no  |
| united states | dirofilaria ursi              | Helminth | yes | yes | no  |
| united states | cladosporium cucumerinum      | Fungi    | no  | no  | no  |
| united states | feline papillomavirus         | Virus    | no  | no  | no  |
| united states | naegleria pagei               | Protozoa | no  | no  | no  |
| united states | taenia serialis               | Helminth | yes | no  | no  |
| united states | ehrlichia muris               | Bacteria | no  | no  | no  |
| united states | babesia microti               | Protozoa | yes | yes | yes |
| united states | fort morgan virus             | Virus    | no  | no  | no  |
| united states | treponema pallidum            | Bacteria | yes | no  | yes |
| united states | pilobolus heterosporus        | Fungi    | no  | no  | no  |
| united states | duck circovirus               | Virus    | no  | no  | no  |
| united states | ascaridia galli               | Helminth | no  | no  | no  |
| united states | moraxella bovis               | Bacteria | yes | yes | no  |
| united states | haplometrana intestinalis     | Helminth | no  | no  | no  |
| united states | parainfluenza virus 5         | Virus    | no  | no  | no  |
| united states | porphyromonas asaccharolytica | Bacteria | yes | yes | no  |
| united states | yarrowia lipolytica           | Fungi    | no  | no  | no  |
| united states | aspergillus fumigatus         | Fungi    | no  | no  | no  |
| united states | flavobacterium psychrophilum  | Bacteria | no  | no  | no  |
| united states | rhizopus oryzae               | Fungi    | yes | yes | no  |
| united states | ophiostoma stenoceras         | Fungi    | no  | no  | no  |
| united states | taylorella asinigenitalis     | Bacteria | no  | no  | no  |
| united states | calyptrozyna arxii            | Fungi    | no  | no  | no  |
| united states | macacine herpesvirus 5        | Virus    | no  | no  | no  |
| united states | geomyces destructans          | Fungi    | no  | no  | no  |
| united states | ralstonia pickettii           | Bacteria | yes | no  | no  |
| united states | ehrlichia chaffeensis         | Bacteria | yes | yes | yes |
| united states | borrelia burgdorferi          | Bacteria | yes | yes | yes |
| united states | simian virus 40               | Virus    | no  | no  | no  |
| united states | nosema ceranae                | Fungi    | no  | no  | no  |
| united states | mumps virus                   | Virus    | yes | no  | no  |
| united states | porphyromonas gingivalis      | Bacteria | yes | yes | no  |
| united states | aliivibrio logei              | Bacteria | no  | no  | no  |
| united states | bluetongue virus              | Virus    | no  | no  | no  |
| united states | oslerus osleri                | Helminth | no  | no  | no  |
| united states | toxoplasma gondii             | Protozoa | yes | yes | yes |
| united states | feline foamy virus            | Virus    | no  | no  | no  |
| united states | acipenserid herpesvirus 2     | Virus    | no  | no  | no  |
| united states | human parvovirus b19          | Virus    | no  | no  | no  |
| united states | hapalorhynchus gracilis       | Helminth | no  | no  | no  |
| united states | cladosporium sphaerospermum   | Fungi    | no  | no  | no  |
| united states | saimiriine herpesvirus 2      | Virus    | no  | no  | no  |
| united states | clostridium difficile         | Bacteria | yes | yes | yes |
| united states | newcastle disease virus       | Virus    | yes | yes | no  |
| united states | parafilaroides decorus        | Helminth | no  | no  | no  |
| united states | parelaphostrongylus odocoilei | Helminth | no  | no  | no  |
| united states | chaetomium globosum           | Fungi    | yes | no  | no  |
| united states | hymenolepis nana              | Helminth | yes | yes | no  |
| united states | rhizomucor miehei             | Fungi    | yes | yes | no  |

|               |                                     |          |     |     |     |
|---------------|-------------------------------------|----------|-----|-----|-----|
| united states | yersinia pestis                     | Bacteria | yes | yes | yes |
| united states | photobacterium phosphoreum          | Bacteria | no  | no  | no  |
| united states | tamiami virus                       | Virus    | no  | no  | no  |
| united states | allobilharzia visceralis            | Helminth | no  | no  | no  |
| united states | ochrobactrum pseudintermedium       | Bacteria | no  | no  | no  |
| united states | crepidostomum cooperi               | Helminth | no  | no  | no  |
| united states | listeria innocua                    | Bacteria | no  | no  | no  |
| united states | williamsia serinedens               | Bacteria | no  | no  | no  |
| united states | bacteroides thetaiotaomicron        | Bacteria | yes | no  | no  |
| united states | mycobacterium marinum               | Bacteria | yes | yes | yes |
| united states | baboon orthoreovirus                | Virus    | no  | no  | no  |
| united states | bovine ephemeral fever virus        | Virus    | yes | yes | no  |
| united states | feline leukemia virus               | Virus    | no  | no  | no  |
| united states | bartonella rochalimae               | Bacteria | no  | no  | no  |
| united states | cryptococcus neoformans             | Fungi    | yes | yes | yes |
| united states | epizootic hemorrhagic disease virus | Virus    | no  | no  | no  |
| united states | paranoplocephala macrocephala       | Helminth | no  | no  | no  |
| united states | bacteroides ovatus                  | Bacteria | yes | no  | no  |
| united states | deinococcus proteolyticus           | Bacteria | no  | no  | no  |
| united states | taenia solium                       | Helminth | yes | no  | yes |
| united states | bovine enterovirus                  | Virus    | no  | no  | no  |
| united states | alcelaphine herpesvirus 1           | Virus    | no  | no  | no  |
| united states | gibberella moniliformis             | Fungi    | no  | no  | no  |
| united states | anantrum tortum                     | Helminth | no  | no  | no  |
| united states | atractolytocestus huronensis        | Helminth | no  | no  | no  |
| united states | cryptosporidium felis               | Protozoa | no  | no  | no  |
| united states | mycoplasma gallisepticum            | Bacteria | no  | no  | no  |
| united states | paragrillotia similis               | Helminth | no  | no  | no  |
| united states | human immunodeficiency virus 1      | Virus    | yes | no  | yes |
| united states | bacillus pumilus                    | Bacteria | yes | no  | no  |
| united states | mycobacterium simiae                | Bacteria | yes | yes | no  |
| united states | borrelia carolinensis               | Bacteria | no  | no  | no  |
| united states | aspergillus ochraceus               | Fungi    | no  | no  | no  |
| united states | clostridium perfringens             | Bacteria | yes | yes | no  |
| united states | influenza a virus                   | Virus    | yes | yes | yes |
| united states | california encephalitis virus       | Virus    | yes | yes | yes |
| united states | haemophilus influenzae              | Bacteria | yes | no  | yes |
| united states | polystoma nearcticum                | Helminth | no  | no  | no  |
| united states | mycobacterium shottsii              | Bacteria | no  | no  | no  |
| united states | bovine herpesvirus 1                | Virus    | no  | no  | no  |
| united states | neoparamoeba pemaquidensis          | Protozoa | no  | no  | no  |
| united states | human picobirnavirus                | Virus    | no  | no  | no  |
| united states | pseudomonas alcaligenes             | Bacteria | yes | no  | no  |
| united states | eimeria arnyi                       | Protozoa | no  | no  | no  |
| united states | human enterovirus c                 | Virus    | yes | no  | no  |
| united states | human parainfluenza virus 3         | Virus    | yes | no  | no  |
| united states | bacillus amyloliquefaciens          | Bacteria | no  | no  | no  |
| united states | orf virus                           | Virus    | yes | yes | no  |
| united states | lysiniibacillus sphaericus          | Bacteria | no  | no  | no  |
| united states | minute virus of mice                | Virus    | no  | no  | no  |

|                     |                                   |          |     |     |     |
|---------------------|-----------------------------------|----------|-----|-----|-----|
| united states       | staphylococcus xylosus            | Bacteria | no  | no  | no  |
| united states       | pantoea agglomerans               | Bacteria | yes | yes | no  |
| united states       | borrelia coriaceae                | Bacteria | no  | no  | no  |
| united states       | alcaligenes faecalis              | Bacteria | no  | no  | no  |
| united states       | cryptococcus gattii               | Fungi    | no  | no  | no  |
| united states       | taenia crassiceps                 | Helminth | yes | yes | no  |
| united states       | paracryptotrematina limi          | Helminth | no  | no  | no  |
| united states       | human papillomavirus 6            | Virus    | no  | no  | no  |
| united states minor | staphylococcus aureus             | Bacteria | yes | yes | yes |
| united states minor | human immunodeficiency virus 2    | Virus    | yes | no  | yes |
| united states minor | mycobacterium tuberculosis        | Bacteria | yes | yes | yes |
| united states minor | saccharomyces cerevisiae          | Fungi    | yes | no  | no  |
| united states minor | trypanosoma brucei                | Protozoa | yes | yes | yes |
| united states minor | escherichia coli                  | Bacteria | yes | yes | yes |
| united states minor | bacillus subtilis                 | Bacteria | yes | yes | no  |
| united states minor | bacillus anthracis                | Bacteria | yes | yes | yes |
| united states minor | human immunodeficiency virus 1    | Virus    | yes | no  | yes |
| united states minor | influenza a virus                 | Virus    | yes | yes | yes |
| uruguay             | bacillus megaterium               | Bacteria | no  | no  | no  |
| uruguay             | sindbis virus                     | Virus    | yes | yes | yes |
| uruguay             | helicobacter pylori               | Bacteria | yes | yes | no  |
| uruguay             | bacillus subtilis                 | Bacteria | yes | yes | no  |
| uruguay             | bacillus pumilus                  | Bacteria | yes | no  | no  |
| uruguay             | enterobacter ludwigii             | Bacteria | no  | no  | no  |
| uruguay             | achromobacter xylosoxidans        | Bacteria | yes | no  | no  |
| uruguay             | hepatitis c virus                 | Virus    | yes | no  | yes |
| uruguay             | bacillus licheniformis            | Bacteria | yes | yes | no  |
| uruguay             | bovine herpesvirus 5              | Virus    | no  | no  | no  |
| uruguay             | foot-and-mouth disease virus      | Virus    | no  | no  | no  |
| uruguay             | pseudomonas putida                | Bacteria | yes | no  | no  |
| uruguay             | fasciola hepatica                 | Helminth | yes | yes | no  |
| uruguay             | hepatitis e virus                 | Virus    | yes | yes | yes |
| uruguay             | measles virus                     | Virus    | yes | yes | yes |
| uruguay             | hepatitis b virus                 | Virus    | yes | no  | yes |
| uruguay             | andes virus                       | Virus    | yes | yes | yes |
| uruguay             | raoultella terrigena              | Bacteria | no  | no  | no  |
| uruguay             | anaplasma marginale               | Bacteria | no  | no  | no  |
| uruguay             | streptococcus pneumoniae          | Bacteria | yes | yes | yes |
| uruguay             | influenza a virus                 | Virus    | yes | yes | yes |
| uruguay             | moraxella bovis                   | Bacteria | yes | yes | no  |
| uruguay             | bovine herpesvirus 1              | Virus    | no  | no  | no  |
| uruguay             | human respiratory syncytial virus | Virus    | yes | no  | no  |
| uruguay             | hepatitis a virus                 | Virus    | yes | yes | yes |
| uruguay             | moraxella bovoculi                | Bacteria | no  | no  | no  |
| uruguay             | raoultella planticola             | Bacteria | no  | no  | no  |
| uruguay             | bacillus thuringiensis            | Bacteria | yes | no  | no  |
| uruguay             | ophiostoma stenoceras             | Fungi    | no  | no  | no  |
| uruguay             | cryptococcus gattii               | Fungi    | no  | no  | no  |
| uruguay             | human immunodeficiency virus 1    | Virus    | yes | no  | yes |
| uruguay             | feline panleukopenia virus        | Virus    | no  | no  | no  |

|            |                                       |          |     |     |     |
|------------|---------------------------------------|----------|-----|-----|-----|
| uruguay    | klebsiella oxytoca                    | Bacteria | yes | yes | no  |
| uruguay    | bacillus circulans                    | Bacteria | yes | no  | no  |
| uruguay    | escherichia coli                      | Bacteria | yes | yes | yes |
| uruguay    | bacillus cereus                       | Bacteria | yes | yes | no  |
| uruguay    | echinococcus granulosus               | Helminth | yes | yes | yes |
| uruguay    | neisseria gonorrhoeae                 | Bacteria | yes | no  | yes |
| uruguay    | canine distemper virus                | Virus    | no  | no  | no  |
| uruguay    | human immunodeficiency virus 2        | Virus    | yes | no  | yes |
| uzbekistan | leishmania infantum                   | Protozoa | yes | yes | yes |
| uzbekistan | jc polyomavirus                       | Virus    | no  | no  | no  |
| uzbekistan | leishmania turanica                   | Protozoa | no  | no  | no  |
| uzbekistan | hepatitis b virus                     | Virus    | yes | no  | yes |
| uzbekistan | cordyceps bassiana                    | Fungi    | no  | no  | no  |
| uzbekistan | leishmania major                      | Protozoa | yes | yes | no  |
| uzbekistan | human enterovirus b                   | Virus    | yes | no  | yes |
| uzbekistan | measles virus                         | Virus    | yes | yes | yes |
| uzbekistan | crimean-congo hemorrhagic fever virus | Virus    | no  | no  | no  |
| uzbekistan | human immunodeficiency virus 1        | Virus    | yes | no  | yes |
| uzbekistan | influenza a virus                     | Virus    | yes | yes | yes |
| vanuatu    | jc polyomavirus                       | Virus    | no  | no  | no  |
| vanuatu    | hepatitis b virus                     | Virus    | yes | no  | yes |
| vanuatu    | plasmodium vivax                      | Protozoa | yes | no  | yes |
| vanuatu    | plasmodium falciparum                 | Protozoa | yes | no  | yes |
| vanuatu    | primate t-lymphotropic virus 1        | Virus    | no  | no  | no  |
| venezuela  | litomosoides yutajensis               | Helminth | no  | no  | no  |
| venezuela  | taenia solium                         | Helminth | yes | no  | yes |
| venezuela  | trichuris trichiura                   | Helminth | yes | yes | no  |
| venezuela  | mycobacterium tuberculosis            | Bacteria | yes | yes | yes |
| venezuela  | trypanosoma evansi                    | Protozoa | no  | no  | no  |
| venezuela  | hepatitis b virus                     | Virus    | yes | no  | yes |
| venezuela  | giardia intestinalis                  | Protozoa | no  | no  | no  |
| venezuela  | paracoccidioides brasiliensis         | Fungi    | yes | yes | no  |
| venezuela  | escherichia coli                      | Bacteria | yes | yes | yes |
| venezuela  | cano delgado virus                    | Virus    | no  | no  | no  |
| venezuela  | pseudomonas putida                    | Bacteria | yes | no  | no  |
| venezuela  | staphylococcus aureus                 | Bacteria | yes | yes | yes |
| venezuela  | ehrlichia canis                       | Bacteria | no  | no  | no  |
| venezuela  | stenella araguata                     | Fungi    | yes | no  | no  |
| venezuela  | human respiratory syncytial virus     | Virus    | yes | no  | no  |
| venezuela  | pseudomonas aeruginosa                | Bacteria | yes | yes | yes |
| venezuela  | plasmodium falciparum                 | Protozoa | yes | no  | yes |
| venezuela  | fonsecaea pedrosoi                    | Fungi    | no  | no  | no  |
| venezuela  | piratuba scaffii                      | Helminth | no  | no  | no  |
| venezuela  | sporothrix schenckii                  | Fungi    | yes | yes | no  |
| venezuela  | pirital virus                         | Virus    | no  | no  | no  |
| venezuela  | cladophialophora carrionii            | Fungi    | yes | no  | no  |
| venezuela  | venezuelan equine encephalitis virus  | Virus    | yes | yes | yes |
| venezuela  | clavispora lusitaniae                 | Fungi    | no  | no  | no  |
| venezuela  | foot-and-mouth disease virus          | Virus    | no  | no  | no  |
| venezuela  | leishmania braziliensis               | Protozoa | yes | yes | no  |

|           |                                   |          |     |     |     |
|-----------|-----------------------------------|----------|-----|-----|-----|
| venezuela | dipetalonema gracile              | Helminth | no  | no  | no  |
| venezuela | cladosporium oxysporum            | Fungi    | yes | no  | no  |
| venezuela | schistosoma mansoni               | Helminth | yes | yes | yes |
| venezuela | human immunodeficiency virus 1    | Virus    | yes | no  | yes |
| venezuela | ochrobactrum intermedium          | Bacteria | no  | no  | no  |
| venezuela | providencia rettgeri              | Bacteria | yes | yes | no  |
| venezuela | serratia marcescens               | Bacteria | yes | yes | yes |
| venezuela | pseudomonas pseudoalcaligenes     | Bacteria | yes | no  | no  |
| venezuela | dengue virus                      | Virus    | no  | no  | no  |
| venezuela | hepatitis c virus                 | Virus    | yes | no  | yes |
| venezuela | newcastle disease virus           | Virus    | yes | yes | no  |
| venezuela | influenza a virus                 | Virus    | yes | yes | yes |
| venezuela | andes virus                       | Virus    | yes | yes | yes |
| venezuela | hepatitis a virus                 | Virus    | yes | yes | yes |
| venezuela | litomosoides sigmodontis          | Helminth | no  | no  | no  |
| venezuela | entamoeba histolytica             | Protozoa | yes | yes | no  |
| venezuela | helicobacter pylori               | Bacteria | yes | yes | no  |
| venezuela | cladosporium velox                | Fungi    | no  | no  | no  |
| venezuela | mansonella atelensis              | Helminth | no  | no  | no  |
| venezuela | hepatitis delta virus             | Virus    | yes | no  | no  |
| venezuela | comamonas testosteroni            | Bacteria | yes | no  | no  |
| venezuela | plasmodium vivax                  | Protozoa | yes | no  | yes |
| venezuela | norwalk virus                     | Virus    | yes | no  | yes |
| venezuela | rotavirus c                       | Virus    | yes | yes | yes |
| venezuela | eastern equine encephalitis virus | Virus    | yes | yes | yes |
| venezuela | haemoproteus columbae             | Protozoa | no  | no  | no  |
| venezuela | campylobacter fetus               | Bacteria | yes | yes | yes |
| venezuela | sapporo virus                     | Virus    | no  | no  | no  |
| venezuela | anaplasma marginale               | Bacteria | no  | no  | no  |
| venezuela | ochoterenella royi                | Helminth | no  | no  | no  |
| venezuela | guanarito virus                   | Virus    | yes | yes | yes |
| venezuela | mansonella ozzardi                | Helminth | yes | no  | no  |
| venezuela | infectious bursal disease virus   | Virus    | no  | no  | no  |
| venezuela | human immunodeficiency virus 2    | Virus    | yes | no  | yes |
| venezuela | trypanosoma rangeli               | Protozoa | no  | no  | no  |
| venezuela | ascaris lumbricoides              | Helminth | yes | yes | no  |
| venezuela | trypanosoma cruzi                 | Protozoa | yes | yes | yes |
| venezuela | cryptococcus gattii               | Fungi    | no  | no  | no  |
| venezuela | anaplasma platys                  | Bacteria | no  | no  | no  |
| venezuela | primate t-lymphotropic virus 2    | Virus    | no  | no  | no  |
| vietnam   | entamoeba coli                    | Protozoa | no  | no  | no  |
| vietnam   | acholeplasma laidlawii            | Bacteria | no  | no  | no  |
| vietnam   | vibrio cholerae                   | Bacteria | yes | no  | yes |
| vietnam   | hepatitis c virus                 | Virus    | yes | no  | yes |
| vietnam   | yersinia pestis                   | Bacteria | yes | yes | yes |
| vietnam   | canine distemper virus            | Virus    | no  | no  | no  |
| vietnam   | helicobacter pylori               | Bacteria | yes | yes | no  |
| vietnam   | plasmodium vivax                  | Protozoa | yes | no  | yes |
| vietnam   | haplorchis pumilio                | Helminth | no  | no  | no  |
| vietnam   | human enterovirus c               | Virus    | yes | no  | no  |

|         |                                        |          |     |     |     |
|---------|----------------------------------------|----------|-----|-----|-----|
| vietnam | plasmodium juxtannucleare              | Protozoa | no  | no  | no  |
| vietnam | pasteurella multocida                  | Bacteria | yes | yes | no  |
| vietnam | bacillus subtilis                      | Bacteria | yes | yes | no  |
| vietnam | human adenovirus c                     | Virus    | yes | no  | no  |
| vietnam | borrelia americana                     | Bacteria | no  | no  | no  |
| vietnam | entamoeba histolytica                  | Protozoa | yes | yes | no  |
| vietnam | human immunodeficiency virus 2         | Virus    | yes | no  | yes |
| vietnam | plasmodium gallinaceum                 | Protozoa | no  | no  | no  |
| vietnam | burkholderia cepacia                   | Bacteria | yes | no  | no  |
| vietnam | paragonimus heterotremus               | Helminth | yes | yes | no  |
| vietnam | infectious bursal disease virus        | Virus    | no  | no  | no  |
| vietnam | escherichia coli                       | Bacteria | yes | yes | yes |
| vietnam | rhodococcus rhodochrous                | Bacteria | yes | no  | no  |
| vietnam | norwalk virus                          | Virus    | yes | no  | yes |
| vietnam | severe acute respiratory syndrome-rel  | Virus    | no  | no  | no  |
| vietnam | bk polyomavirus                        | Virus    | no  | no  | no  |
| vietnam | ichthyodinium chabelardi               | Protozoa | no  | no  | no  |
| vietnam | mouse mammary tumor virus              | Virus    | no  | no  | no  |
| vietnam | porcine reproductive and respiratory s | Virus    | no  | no  | no  |
| vietnam | human enterovirus a                    | Virus    | yes | no  | no  |
| vietnam | pseudomonas putida                     | Bacteria | yes | no  | no  |
| vietnam | bacillus pumilus                       | Bacteria | yes | no  | no  |
| vietnam | rotavirus a                            | Virus    | yes | yes | yes |
| vietnam | bacillus cereus                        | Bacteria | yes | yes | no  |
| vietnam | saccharomyces cerevisiae               | Fungi    | yes | no  | no  |
| vietnam | measles virus                          | Virus    | yes | yes | yes |
| vietnam | mycoplasma gallinarum                  | Bacteria | no  | no  | no  |
| vietnam | fusarium oxysporum                     | Fungi    | yes | no  | yes |
| vietnam | mycoplasma iowae                       | Bacteria | no  | no  | no  |
| vietnam | cryptosporidium parvum                 | Protozoa | yes | yes | yes |
| vietnam | trichoderma longibrachiatum            | Fungi    | no  | no  | no  |
| vietnam | foot-and-mouth disease virus           | Virus    | no  | no  | no  |
| vietnam | vibrio parahaemolyticus                | Bacteria | yes | yes | yes |
| vietnam | dengue virus                           | Virus    | no  | no  | no  |
| vietnam | mycobacterium leprae                   | Bacteria | yes | yes | yes |
| vietnam | hepatitis e virus                      | Virus    | yes | yes | yes |
| vietnam | fusarium incarnatum                    | Fungi    | yes | no  | no  |
| vietnam | theileria orientalis                   | Protozoa | no  | no  | no  |
| vietnam | fasciola gigantica                     | Helminth | yes | yes | no  |
| vietnam | pseudomonas aeruginosa                 | Bacteria | yes | yes | yes |
| vietnam | human respiratory syncytial virus      | Virus    | yes | no  | no  |
| vietnam | rubella virus                          | Virus    | yes | no  | no  |
| vietnam | cyprinid herpesvirus 3                 | Virus    | no  | no  | no  |
| vietnam | penicillium chrysogenum                | Fungi    | yes | no  | no  |
| vietnam | japanese encephalitis virus            | Virus    | yes | yes | yes |
| vietnam | mycobacterium tuberculosis             | Bacteria | yes | yes | yes |
| vietnam | aspergillus terreus                    | Fungi    | no  | no  | no  |
| vietnam | methylobacterium radiotolerans         | Bacteria | no  | no  | no  |
| vietnam | klebsiella pneumoniae                  | Bacteria | yes | yes | yes |
| vietnam | aspergillus niger                      | Fungi    | yes | yes | no  |

|                   |                                  |          |     |     |     |
|-------------------|----------------------------------|----------|-----|-----|-----|
| vietnam           | human immunodeficiency virus 1   | Virus    | yes | no  | yes |
| vietnam           | mycoplasma synoviae              | Bacteria | no  | no  | no  |
| vietnam           | bartonella elizabethae           | Bacteria | yes | yes | no  |
| vietnam           | haplorchis taichui               | Helminth | yes | yes | no  |
| vietnam           | influenza a virus                | Virus    | yes | yes | yes |
| vietnam           | hepatitis b virus                | Virus    | yes | no  | yes |
| vietnam           | edwardsiella ictaluri            | Bacteria | no  | no  | no  |
| vietnam           | taenia saginata                  | Helminth | yes | yes | no  |
| vietnam           | rabies virus                     | Virus    | yes | yes | yes |
| vietnam           | fasciolopsis buski               | Helminth | yes | yes | no  |
| vietnam           | bacillus thuringiensis           | Bacteria | yes | no  | no  |
| vietnam           | bacillus flexus                  | Bacteria | no  | no  | no  |
| vietnam           | human papillomavirus 61          | Virus    | no  | no  | no  |
| vietnam           | clonorchis sinensis              | Helminth | yes | no  | no  |
| vietnam           | plasmodium ovale                 | Protozoa | yes | no  | no  |
| vietnam           | salmonella enterica              | Bacteria | no  | no  | no  |
| vietnam           | taenia solium                    | Helminth | yes | no  | yes |
| vietnam           | seoul virus                      | Virus    | yes | yes | yes |
| vietnam           | bacillus mycoides                | Bacteria | yes | no  | no  |
| vietnam           | porcine epidemic diarrhea virus  | Virus    | no  | no  | no  |
| vietnam           | plasmodium falciparum            | Protozoa | yes | no  | yes |
| vietnam           | mycoplasma gallisepticum         | Bacteria | no  | no  | no  |
| vietnam           | haliotrema cromileptis           | Helminth | no  | no  | no  |
| vietnam           | neopolystoma palpebrae           | Helminth | no  | no  | no  |
| vietnam           | jc polyomavirus                  | Virus    | no  | no  | no  |
| wallis and futuna | brucella suis                    | Bacteria | yes | yes | no  |
| wallis and futuna | jc polyomavirus                  | Virus    | no  | no  | no  |
| yemen             | haemonchus contortus             | Helminth | yes | yes | no  |
| yemen             | onchocerca volvulus              | Helminth | yes | yes | yes |
| yemen             | hepatitis b virus                | Virus    | yes | no  | yes |
| yemen             | cryptosporidium parvum           | Protozoa | yes | yes | yes |
| yemen             | cryptosporidium hominis          | Protozoa | yes | no  | yes |
| yemen             | cochliobolus spicifer            | Fungi    | no  | no  | no  |
| yemen             | human immunodeficiency virus 1   | Virus    | yes | no  | yes |
| yemen             | dengue virus                     | Virus    | no  | no  | no  |
| yemen             | peste-des-petits-ruminants virus | Virus    | no  | no  | no  |
| yemen             | foot-and-mouth disease virus     | Virus    | no  | no  | no  |
| zambia            | mycobacterium tuberculosis       | Bacteria | yes | yes | yes |
| zambia            | human enterovirus c              | Virus    | yes | no  | no  |
| zambia            | human immunodeficiency virus 2   | Virus    | yes | no  | yes |
| zambia            | african swine fever virus        | Virus    | no  | no  | no  |
| zambia            | trypanosoma congolense           | Protozoa | no  | no  | no  |
| zambia            | human immunodeficiency virus 1   | Virus    | yes | no  | yes |
| zambia            | theileria parva                  | Protozoa | no  | no  | no  |
| zambia            | rift valley fever virus          | Virus    | yes | yes | yes |
| zambia            | influenza a virus                | Virus    | yes | yes | yes |
| zambia            | botryosphaeria dothidea          | Fungi    | no  | no  | no  |
| zambia            | cladosporium cladosporioides     | Fungi    | yes | no  | no  |
| zambia            | schistosoma mattheei             | Helminth | yes | yes | no  |
| zambia            | plasmodium falciparum            | Protozoa | yes | no  | yes |

|          |                                |          |     |     |     |
|----------|--------------------------------|----------|-----|-----|-----|
| zambia   | botryosphaeria rhodina         | Fungi    | no  | no  | no  |
| zambia   | cryptosporidium parvum         | Protozoa | yes | yes | yes |
| zambia   | schistosoma haematobium        | Helminth | yes | yes | no  |
| zambia   | cryptococcus neoformans        | Fungi    | yes | yes | yes |
| zambia   | jc polyomavirus                | Virus    | no  | no  | no  |
| zambia   | fasciola gigantica             | Helminth | yes | yes | no  |
| zambia   | schistosoma mansoni            | Helminth | yes | yes | yes |
| zambia   | measles virus                  | Virus    | yes | yes | yes |
| zambia   | foot-and-mouth disease virus   | Virus    | no  | no  | no  |
| zambia   | xanthomonas campestris         | Bacteria | no  | no  | no  |
| zambia   | trypanosoma brucei             | Protozoa | yes | yes | yes |
| zambia   | human herpesvirus 8            | Virus    | yes | no  | yes |
| zambia   | rabies virus                   | Virus    | yes | yes | yes |
| zimbabwe | staphylococcus aureus          | Bacteria | yes | yes | yes |
| zimbabwe | human immunodeficiency virus 2 | Virus    | yes | no  | yes |
| zimbabwe | hepatitis b virus              | Virus    | yes | no  | yes |
| zimbabwe | rotavirus a                    | Virus    | yes | yes | yes |
| zimbabwe | measles virus                  | Virus    | yes | yes | yes |
| zimbabwe | macrogyrodactylus clarii       | Helminth | no  | no  | no  |
| zimbabwe | human immunodeficiency virus 1 | Virus    | yes | no  | yes |
| zimbabwe | streptococcus agalactiae       | Bacteria | yes | yes | no  |
| zimbabwe | xanthomonas campestris         | Bacteria | no  | no  | no  |
| zimbabwe | middelburg virus               | Virus    | no  | no  | no  |
| zimbabwe | human papillomavirus 16        | Virus    | no  | no  | no  |
| zimbabwe | escherichia coli               | Bacteria | yes | yes | yes |
| zimbabwe | trichinella zimbabweensis      | Helminth | no  | no  | no  |
| zimbabwe | anaplasma marginale            | Bacteria | no  | no  | no  |
| zimbabwe | macrogyrodactylus karibae      | Helminth | no  | no  | no  |
| zimbabwe | neisseria gonorrhoeae          | Bacteria | yes | no  | yes |
| zimbabwe | mycoplasma crocodyli           | Bacteria | no  | no  | no  |
| zimbabwe | rift valley fever virus        | Virus    | yes | yes | yes |
| zimbabwe | mycobacterium tuberculosis     | Bacteria | yes | yes | yes |
| zimbabwe | plasmodium falciparum          | Protozoa | yes | no  | yes |
| zimbabwe | mokola virus                   | Virus    | yes | yes | no  |
| zimbabwe | human herpesvirus 8            | Virus    | yes | no  | yes |
| zimbabwe | african swine fever virus      | Virus    | no  | no  | no  |
| zimbabwe | avibacterium gallinarum        | Bacteria | no  | no  | no  |
| zimbabwe | duvenhage virus                | Virus    | yes | yes | no  |
| zimbabwe | human herpesvirus 2            | Virus    | no  | no  | no  |
| zimbabwe | foot-and-mouth disease virus   | Virus    | no  | no  | no  |
| zimbabwe | rabies virus                   | Virus    | yes | yes | yes |
| zimbabwe | bluetongue virus               | Virus    | no  | no  | no  |
| zimbabwe | trichoderma longibrachiatum    | Fungi    | no  | no  | no  |
